# Supplementary material for: Evaluation of Methane Sources in Groundwater in Northeastern Pennsylvania
Source: PubMed Central journal article supplement (PMC3746116; doi:10.1111/gwat.12056), 2013-04-05
Supplement: gwat0051-0333-SD2.pdf [file gwat0051-0333-SD2.pdf]

Table S.8. Groundwater Quality Data for 1701 "Pre-Drill" Water Well Samples from Susquehanna County, Pennsylvania

| Water Well ID | Sample Date | Sampling Port                      | Topographic Location | Gas Extraction Area (Within 1 km of Active Gas Well) | Groundwater Type (If Determined) | Alkalinity (mg/L) | Aluminum (mg/L) | Arsenic (mg/L) | Barium (mg/L) | Boron (mg/L) | Bromide (mg/L) | Cadmium (mg/L) | Calcium (mg/L) | Chloride (mg/L) | Chromium (mg/L) | Conductivity - Field (µs/cm) |
|---------------|-------------|------------------------------------|----------------------|------------------------------------------------------|----------------------------------|-------------------|-----------------|----------------|---------------|--------------|----------------|----------------|----------------|-----------------|-----------------|------------------------------|
| 1             | 6/3/2011    |                                    | Valley               |                                                      | Calcium-Bicarbonate              | 44                | <0.03           | <0.001         | 0.047         |              |                | <0.001         | 15             | 2               | <0.002          |                              |
| 2             | 5/27/2010   | Pressure Tank                      | Valley               |                                                      |                                  |                   |                 | 0.018          | 1.28          |              |                |                |                |                 |                 | 364                          |
| 3             | 6/29/2011   |                                    | Upland               |                                                      |                                  | 110               | <0.03           | <0.001         |               |              |                | <0.001         | 29             |                 | <0.002          | 0.072                        |
| 4             | 6/29/2011   |                                    | Upland               |                                                      | Calcium-Sodium-Bicarbonate       | 50                | <.03            | <.001          | 0.066         |              | <.02           | <.001          | 6.2            | 1.7             | <.002           |                              |
| 5             | 6/17/2010   | Outside Spigot                     | Upland               | Yes                                                  |                                  |                   |                 |                |               |              |                |                |                |                 |                 | 379                          |
| 6             | 6/17/2010   | Kitchen Sink                       | Valley               |                                                      |                                  |                   |                 |                |               |              |                |                |                |                 |                 | 153.5                        |
| 7             | 6/17/2010   | Kitchen Sink                       | Upland               |                                                      |                                  |                   |                 |                |               |              |                |                |                |                 |                 | 142.7                        |
| 8             | 4/10/2010   | Pressure Tank                      | Upland               |                                                      |                                  |                   | <.1             | <.003          | 0.105         | <.1          |                |                |                | 12.2            |                 | 105.7                        |
| 9             | 4/10/2010   | Basement At Pressure Tank          | Upland               |                                                      |                                  |                   | <.1             | <.003          | 0.131         | <.1          |                |                |                | 4.41            |                 | 201                          |
| 10            | 4/10/2010   | Pressure Tank                      | Valley               |                                                      |                                  |                   | <.1             | <.003          | 0.13          | <.1          |                |                |                | 5.2             |                 | 153.5                        |
| 11            | 4/11/2010   | Outside Hydrant Directly From Well | Upland               |                                                      |                                  |                   | <.1             | <.003          | 0.097         | <.1          |                |                |                | 6.41            |                 | 151.8                        |
| 12            | 4/11/2010   |                                    | Valley               |                                                      |                                  |                   | <.1             | <.003          | 0.058         | <.1          |                |                |                | 6.36            |                 |                              |
| 13            | 4/11/2010   | Kitchen Sink                       | Valley               |                                                      |                                  |                   | <.1             | 0.038          | 0.3           | <.1          |                |                |                | 5.93            |                 | 257                          |
| 14            | 4/11/2010   | Kitchen Sink                       | Upland               | Yes                                                  |                                  |                   | <.1             | <.003          | 0.154         | <.1          |                |                |                | 5.84            |                 | 190.4                        |
| 15            | 4/11/2010   | Pressures Tank                     | Upland               |                                                      |                                  |                   | <.1             | <.003          | 0.146         | <.1          |                |                |                | 42.6            |                 | 284                          |
| 16            | 4/11/2010   | Kitchen Sink                       | Valley               |                                                      |                                  |                   | <.1             | <.003          | 1.62          | 0.168        |                |                |                | 9.14            |                 | 255                          |
| 17            | 4/11/2010   | Kitchen Sink                       | Upland               |                                                      |                                  |                   | <.1             | <.003          | 0.4           | <.1          |                |                |                | 6.64            |                 |                              |
| 18            | 4/11/2010   | Outside Hydrant Direct From Well   | Upland               |                                                      |                                  |                   | <.1             | <.003          | 0.614         | <.1          |                |                |                | 3.72            |                 |                              |
| 19            | 4/15/2010   | Outside Hydrant                    | Upland               |                                                      |                                  |                   | <.1             | <.003          | 0.165         | <.1          |                |                |                | 5.04            |                 |                              |
| 20            | 4/15/2010   | Kitchen Sink                       | Upland               |                                                      |                                  |                   | <.1             | <.003          | 0.264         | <.1          |                |                |                | 7.73            |                 |                              |
| 21            | 4/15/2010   | Outside Hydrant                    | Valley               |                                                      |                                  |                   | <.1             | <.003          | 0.064         | <.1          |                |                |                | 20.8            |                 |                              |
| 22            | 4/15/2010   | Pressure Tank                      | Valley               |                                                      |                                  |                   | <.1             | <.003          | 0.105         | <.1          |                |                |                | 7.94            |                 |                              |
| 23            | 4/19/2010   | Laundry Room Sink                  | Upland               |                                                      |                                  |                   | <.1             | <.003          | 0.069         | <.1          |                |                |                | 7.3             |                 |                              |

Table S.8. Groundwater Quality Data for 1701 "Pre-Drill" Water Well Samples from Susquehanna County, Pennsylvania

| Water Well ID | Sample Date | Sampling Port             | Topographic Location | Gas Extraction Area (Within 1 km of Active Gas Well) | Groundwater Type (If Determined) | Alkalinity (mg/L) | Aluminum (mg/L) | Arsenic (mg/L) | Barium (mg/L) | Boron (mg/L) | Bromide (mg/L) | Cadmium (mg/L) | Calcium (mg/L) | Chloride (mg/L) | Chromium (mg/L) | Conductivity - Field (µs/cm) |
|---------------|-------------|---------------------------|----------------------|------------------------------------------------------|----------------------------------|-------------------|-----------------|----------------|---------------|--------------|----------------|----------------|----------------|-----------------|-----------------|------------------------------|
| 24            | 4/19/2010   | Hydrant At Well Head      | Valley               |                                                      |                                  |                   | < .1            | < .003         | 0.11          | < .1         |                |                |                | 8.35            |                 |                              |
| 25            | 4/19/2010   | Diversion Ditch           | Upland               | Yes                                                  |                                  |                   | 0.159           |                | < .025        |              |                |                |                | 4.96            |                 |                              |
| 26            | 4/22/2010   | Kitchen Sink              | Valley               |                                                      |                                  |                   | 0.1             | < .003         | < .191        | < .1         |                |                |                | 47.7            |                 |                              |
| 27            | 4/22/2010   | Kitchen Sink              | Upland               | Yes                                                  |                                  |                   | < .1            | < .003         | 0.051         | < .1         |                |                |                | 7.48            |                 |                              |
| 28            | 4/22/2010   | Basement Sink             | Upland               |                                                      |                                  |                   | < .1            | < .003         | 0.196         | < .1         |                |                |                | 8.65            |                 |                              |
| 29            | 6/24/2010   | Pond                      | Upland               |                                                      |                                  |                   |                 |                |               |              |                |                |                |                 |                 | 84.4                         |
| 30            | 6/24/2010   | Pressure Tank             | Upland               |                                                      |                                  |                   |                 |                |               |              |                |                |                |                 |                 | 209                          |
| 31            | 5/14/2011   |                           | Upland               |                                                      | Calcium-Bicarbonate-Chloride     | 92                | < .03           | < .001         | 0.099         |              | < .02          | < .001         | 41             | 73              | < .002          | 0.351                        |
| 32            | 6/24/2010   | Kitchen Sink              | Valley               |                                                      |                                  |                   |                 |                |               |              |                |                |                |                 |                 | 273                          |
| 33            | 6/24/2010   | Outside Spigot            | Upland               |                                                      |                                  |                   | < .1            | < .003         | 0.105         | < .1         |                |                |                | 4.33            |                 | 174.1                        |
| 34            | 4/25/2010   | Bathroom Faucet           | Upland               | Yes                                                  |                                  |                   | < .1            | < .003         | 0.114         | < .1         |                |                |                | < 2             |                 | 143.7                        |
| 35            | 4/25/2010   |                           | Upland               | Yes                                                  |                                  |                   | < .1            |                | 0.191         |              |                |                |                | 19.1            |                 |                              |
| 36            | 4/24/2010   | Outside Spigot            | Valley               |                                                      |                                  |                   | < .1            | < .003         | 0.22          | < .1         |                |                |                | 153             |                 |                              |
| 37            | 4/24/2010   | Kitchen Sink              | Upland               | Yes                                                  |                                  |                   | < .1            | < .003         | 0.053         | < .1         |                |                |                | 7.61            |                 | 87.1                         |
| 38            | 4/24/2010   |                           | Upland               |                                                      |                                  |                   | < .1            | < .003         | 0.084         | < .1         |                |                |                | 8.26            |                 |                              |
| 39            | 4/24/2010   | Kitchen Bar Sink          | Upland               |                                                      |                                  |                   | < .1            | < .003         | 0.139         | < .1         |                |                |                | 38.5            |                 |                              |
| 40            | 4/24/2010   | Outside Spigot            | Upland               |                                                      |                                  |                   | < .1            | < .003         | 0.282         | < .1         |                |                |                | 2.43            |                 |                              |
| 41            | 4/24/2010   | Outside Spigot            | Upland               |                                                      |                                  |                   | < .1            | < .003         | 0.084         | < .1         |                |                |                | 2.37            |                 |                              |
| 42            | 4/29/2010   | Outside Spigot            | Upland               |                                                      |                                  |                   | < .1            | < .003         | 0.174         | < .1         |                |                |                | 2               |                 |                              |
| 43            | 4/29/2010   | Spring Culvert            | Upland               |                                                      |                                  |                   | < .1            | < .003         | < .029        | < .1         |                |                |                | < 2             |                 |                              |
| 44            | 4/29/2010   | Basement At Pressure Tank | Valley               |                                                      |                                  |                   | < .1            | < .003         | 0.091         | < .1         |                |                |                | 2.53            |                 |                              |
| 45            | 7/2/2010    | Kitchen Sink              | Valley               |                                                      |                                  |                   |                 |                |               |              |                |                |                |                 |                 | 172                          |
| 46            | 7/2/2010    | Bathroom Sink             | Valley               |                                                      |                                  |                   |                 |                |               |              |                |                |                |                 |                 | 194                          |
| 47            | 7/2/2010    | Kitchen Sink              | Valley               |                                                      |                                  |                   |                 |                |               |              |                |                |                |                 |                 | 238                          |
| 48            | 7/2/2010    | Kitchen Sink              | Valley               |                                                      |                                  |                   |                 |                |               |              |                |                |                |                 |                 | 248                          |
| 49            | 7/2/2010    | Kitchen Sink              | Upland               |                                                      |                                  |                   |                 |                |               |              |                |                |                |                 |                 | 231                          |

Table S.8. Groundwater Quality Data for 1701 "Pre-Drill" Water Well Samples from Susquehanna County, Pennsylvania

| Water Well ID | Sample Date | Sampling Port                   | Topographic Location | Gas Extraction Area (Within 1 km of Active Gas Well) | Groundwater Type (If Determined) | Alkalinity (mg/L) | Aluminum (mg/L) | Arsenic (mg/L) | Barium (mg/L) | Boron (mg/L) | Bromide (mg/L) | Cadmium (mg/L) | Calcium (mg/L) | Chloride (mg/L) | Chromium (mg/L) | Conductivity - Field (µs/cm) |
|---------------|-------------|---------------------------------|----------------------|------------------------------------------------------|----------------------------------|-------------------|-----------------|----------------|---------------|--------------|----------------|----------------|----------------|-----------------|-----------------|------------------------------|
| 50            | 7/2/2010    | Kitchen Sink                    | Upland               |                                                      |                                  |                   |                 |                |               |              |                |                |                |                 |                 | 203                          |
| 51            | 7/2/2010    | Kitchen Sink                    | Valley               |                                                      |                                  |                   |                 |                |               |              |                |                |                |                 |                 | 239                          |
| 52            | 7/6/2010    | Kitchen Sink                    | Upland               |                                                      |                                  |                   | < .1            | < .003         | 0.078         | < .1         |                |                |                | 3.54            |                 | 242                          |
| 53            | 7/6/2010    | Garage                          | Valley               |                                                      |                                  |                   | < .1            | 0.006          | 0.41          | < .1         |                |                |                | 4.05            |                 | 263                          |
| 54            | 7/6/2010    | Kitchen Sink                    | Valley               |                                                      |                                  |                   | < .1            | < .003         | 0.104         | < .1         |                |                |                | 3.1             |                 | 127                          |
| 55            | 7/6/2010    | Kitchen Sink                    | Upland               |                                                      |                                  |                   | < .1            | < .003         | 0.235         | 0.159        |                |                |                | 5.4             |                 | 210                          |
| 56            | 7/6/2010    | Kitchen Sink                    | Valley               |                                                      |                                  |                   | < .1            | < .003         | 1.64          | 0.103        |                |                |                | 52.6            |                 | 303                          |
| 57            | 7/6/2010    |                                 | Valley               |                                                      |                                  |                   | < .1            | < .003         | 0.768         | < .1         |                |                |                | 3.01            |                 |                              |
| 58            | 7/6/2010    | Kitchen Sink                    | Valley               |                                                      |                                  |                   | < .1            | < .003         | 0.129         | < .1         |                |                |                | 5.08            |                 | 194                          |
| 59            | 7/6/2010    | Basement At Pressure Tank       | Valley               |                                                      |                                  |                   | < .1            | < .003         | 0.094         | < .1         |                |                |                | 6.27            |                 | 131                          |
| 60            | 7/6/2010    |                                 | Upland               |                                                      |                                  |                   | < .1            | < .003         | 0.053         | < .1         |                |                |                | 29.5            |                 |                              |
| 61            | 7/7/2010    | Kitchen Sink                    | Valley               |                                                      |                                  |                   | < .1            | < .003         | 0.103         | < .1         |                |                |                | 17.8            |                 | 263                          |
| 62            | 7/7/2010    | Spring Head                     | Valley               |                                                      |                                  |                   | < .1            | < .003         | 0.043         | < .1         |                |                |                | 4.26            |                 | 83                           |
| 63            | 7/7/2010    | Kitchen Sink                    | Valley               |                                                      |                                  |                   | < .1            | < .003         | 0.074         | < .1         |                |                |                |                 |                 | 197                          |
| 64            | 7/7/2010    | Kitchen Sink                    | Valley               |                                                      |                                  |                   | < .1            | 0.005          | 0.51          | < .1         |                |                |                | 4.59            |                 | 241                          |
| 65            | 7/7/2010    | Kitchen Sink                    | Valley               |                                                      |                                  |                   | < .1            | < .003         | 0.062         | < .1         |                |                |                | 2.83            |                 | 146                          |
| 66            | 7/7/2010    | Basement Pressure Tank          | Valley               |                                                      |                                  |                   | < .1            | < .003         | 0.165         | < .1         |                |                |                | 3.58            |                 | 141                          |
| 67            | 7/7/2010    | Kitchen Sink                    | Valley               |                                                      |                                  |                   | < .1            | < .003         | 0.52          | < .1         |                |                |                | 18              |                 | 191                          |
| 68            | 7/8/2010    | Basement Sink                   | Valley               |                                                      |                                  |                   | < .1            | < .003         | 0.164         | < .1         |                |                |                | 7.64            |                 | 249                          |
| 69            | 7/8/2010    | Kitchen Sink                    | Upland               |                                                      |                                  |                   | < .1            | < .003         | 0.149         | < .1         |                |                |                | 3.22            |                 | 207                          |
| 70            | 7/8/2010    | Kitchen Sink                    | Valley               |                                                      |                                  |                   | < .1            | < .003         | 0.071         | < .1         |                |                |                | 8.52            |                 | 288                          |
| 71            | 7/9/2010    | Kitchen Sink                    | Valley               |                                                      |                                  |                   | < .1            | < .003         | 0.104         | < .1         |                |                |                | 9.32            |                 | 300                          |
| 72            | 7/9/2010    | Kitchen Sink - Debonis Property | Valley               |                                                      |                                  |                   | < .1            | < .003         | 0.172         | < .1         |                |                |                | 38.8            |                 | 249                          |
| 73            | 7/7/2010    | Kitchen Sink                    | Valley               |                                                      |                                  |                   | < .1            | < .003         | 0.287         | < .1         |                |                |                | 3.9             |                 | 216                          |
| 74            | 7/7/2010    | Outside Garage Spigot           | Valley               |                                                      |                                  |                   | < .1            | < .003         | 0.063         | < .1         |                |                |                | 3.14            |                 | 153                          |

Table S.8. Groundwater Quality Data for 1701 "Pre-Drill" Water Well Samples from Susquehanna County, Pennsylvania

| Water Well ID | Sample Date | Sampling Port | Topographic Location | Gas Extraction Area (Within 1 km of Active Gas Well) | Groundwater Type (If Determined) | Alkalinity (mg/L) | Aluminum (mg/L) | Arsenic (mg/L) | Barium (mg/L) | Boron (mg/L) | Bromide (mg/L) | Cadmium (mg/L) | Calcium (mg/L) | Chloride (mg/L) | Chromium (mg/L) | Conductivity - Field (µs/cm) |
|---------------|-------------|---------------|----------------------|------------------------------------------------------|----------------------------------|-------------------|-----------------|----------------|---------------|--------------|----------------|----------------|----------------|-----------------|-----------------|------------------------------|
| 75            | 7/8/2010    | Kitchen Sink  | Valley               |                                                      |                                  |                   | < .1            | < .003         | < .025        | < .1         |                |                |                | 7.01            |                 |                              |
| 76            | 7/7/2010    | Kitchen Sink  | Valley               |                                                      |                                  |                   | < .1            | < .003         | 0.117         | < .1         |                |                |                | 4.21            |                 | 181                          |
| 77            | 7/7/2010    | Kitchen Sink  | Valley               |                                                      |                                  |                   | < .1            | < .003         | 0.054         | < .1         |                |                |                | 3.32            |                 | 113                          |
| 78            | 7/8/2010    | Kitchen Sink  | Valley               |                                                      |                                  |                   | < .1            | < .003         | 0.887         | < .1         |                |                |                | 3.65            |                 | 159                          |
| 79            | 7/8/2010    | Kitchen Sink  | Upland               |                                                      |                                  |                   | < .1            | < .003         | 0.176         | < .1         |                |                |                | 8.49            |                 | 229                          |
| 80            | 7/8/2010    | Kitchen Sink  | Valley               |                                                      |                                  |                   | < .1            | < .003         | 0.132         | < .1         |                |                |                | 14.7            |                 | 282                          |
| 81            | 7/8/2010    | Kitchen Sink  | Valley               |                                                      |                                  |                   | < .1            | < .003         | 0.152         | < .1         |                |                |                | 46.8            |                 | 187                          |
| 82            | 7/9/2010    |               | Valley               | Yes                                                  |                                  |                   | < .1            | < .003         | 0.174         | < .1         |                |                |                | 42.8            |                 |                              |
| 83            | 7/9/2010    | Kitchen Sink  | Valley               |                                                      |                                  |                   | < .1            | < .003         | 0.197         | < .1         |                |                |                | 168             |                 | 840                          |
| 84            | 7/9/2010    | Kitchen Sink  | Valley               |                                                      |                                  |                   | < .1            | < .003         | 0.132         | < .1         |                |                |                | 6.8             |                 | 234                          |
| 85            | 7/9/2010    | Kitchen Sink  | Upland               |                                                      |                                  |                   | < .1            | < .003         | 0.083         | < .1         |                |                |                | 5.58            |                 | 213                          |
| 86            | 7/9/2010    | Kitchen Sink  | Valley               |                                                      |                                  |                   | < .1            | 0.004          | 0.74          | 0.106        |                |                |                | 2.92            |                 | 269                          |
| 87            | 7/9/2010    |               | Valley               |                                                      |                                  |                   | < .1            | < .003         | 0.058         | < .1         |                |                |                | 2.97            |                 |                              |
| 88            | 7/10/2010   |               | Valley               |                                                      |                                  |                   | < .1            | < .003         | 3.83          | < .1         |                |                |                | 194             |                 |                              |
| 89            | 7/8/2010    | Pressure Tank | Upland               |                                                      |                                  |                   | < .1            | < .003         | 0.096         | < .1         |                |                |                | 3.35            |                 | 146                          |
| 90            | 5/20/2010   | Kitchen Sink  | Valley               |                                                      |                                  |                   | < .1            | < .003         | 0.047         | < .1         |                |                |                | 2.43            |                 | 414                          |
| 91            | 7/11/2010   | Kitchen Sink  | Valley               |                                                      |                                  |                   | < .1            | < .003         | 0.185         | < .1         |                |                |                | 9.99            |                 | 327                          |
| 92            | 7/11/2010   | Barn Hose     | Valley               |                                                      |                                  |                   | <0.1            | <0.003         | 0.041         | <0.1         |                |                |                | 14.8            |                 |                              |
| 93            | 7/8/2010    | Kitchen Sink  | Upland               | Yes                                                  |                                  |                   | < .1            | < .003         | 0.179         | < .1         |                |                |                | 11.5            |                 | 228                          |
| 94            | 4/8/2009    |               | Upland               |                                                      |                                  |                   | <0.05           |                | 0.113         |              |                |                |                | 3.53            |                 |                              |
| 95            | 7/9/2010    |               | Valley               |                                                      |                                  |                   | < .1            | < .003         | 0.187         | < .1         |                |                |                | 4.59            |                 |                              |
| 96            | 7/10/2010   | Kitchen Sink  | Valley               |                                                      |                                  |                   | < .1            | < .003         | 0.145         | < .1         |                |                |                | 6.49            |                 | 296                          |
| 97            | 7/10/2010   | Kitchen Sink  | Upland               |                                                      |                                  |                   | < .1            | 0.004          | 0.028         | < .1         |                |                |                | 4.7             |                 | 109                          |
| 98            | 7/12/2010   | Artesian Well | Valley               |                                                      |                                  |                   | < .1            | < .003         | 0.088         | < .1         |                |                |                | 15.4            |                 |                              |
| 99            | 7/12/2010   |               | Valley               |                                                      |                                  |                   | < .1            | < .003         | 1.54          | 0.141        |                |                |                | 49.6            |                 |                              |
| 100           | 7/12/2010   | Kitchen Sink  | Valley               |                                                      |                                  |                   | < .1            | 0.003          | 0.693         | < .1         |                |                |                | 19.3            |                 | 278                          |
| 101           | 7/12/2010   |               | Valley               |                                                      |                                  |                   | < .1            | < .003         | 4.62          | 0.136        |                |                |                | 394             |                 |                              |
| 102           | 7/12/2010   |               | Valley               |                                                      |                                  |                   | < .1            | < .003         | 0.076         | < .1         |                |                |                | 6.91            |                 |                              |
| 103           | 7/11/2010   | Kitchen Sink  | Valley               | Yes                                                  |                                  |                   | < .1            | < .003         | 1.5           | < .1         |                |                |                | 18.5            |                 | 280                          |

Table S.8. Groundwater Quality Data for 1701 "Pre-Drill" Water Well Samples from Susquehanna County, Pennsylvania

| Water Well ID | Sample Date | Sampling Port  | Topographic Location | Gas Extraction Area (Within 1 km of Active Gas Well) | Groundwater Type (If Determined) | Alkalinity (mg/L) | Aluminum (mg/L) | Arsenic (mg/L) | Barium (mg/L) | Boron (mg/L) | Bromide (mg/L) | Cadmium (mg/L) | Calcium (mg/L) | Chloride (mg/L) | Chromium (mg/L) | Conductivity - Field (µs/cm) |
|---------------|-------------|----------------|----------------------|------------------------------------------------------|----------------------------------|-------------------|-----------------|----------------|---------------|--------------|----------------|----------------|----------------|-----------------|-----------------|------------------------------|
| 104           | 7/12/2010   | Kitchen Sink   | Valley               |                                                      |                                  |                   | < .1            | < .003         | 0.08          | < .1         |                |                |                | 3.26            |                 |                              |
| 105           | 7/13/2010   |                | Upland               |                                                      |                                  |                   | < .1            | < .003         | 0.169         | < .1         |                |                |                | 24.1            |                 |                              |
| 106           | 7/12/2010   | Kitchen Sink   | Valley               |                                                      |                                  |                   | < .1            | < .003         | 0.517         | 0.239        |                |                |                | 17.2            |                 |                              |
| 107           | 7/17/2010   | Kitchen Sink   | Valley               |                                                      |                                  |                   | < .1            | < .003         | 0.155         | < .1         |                |                |                | 5.77            |                 | 187                          |
| 108           | 7/17/2010   | Kitchen Sink   | Valley               |                                                      |                                  |                   | < .1            | < .003         | 0.086         | < .1         |                |                |                | 5.3             |                 | 269                          |
| 109           | 7/17/2010   | Kitchen Sink   | Valley               |                                                      |                                  |                   | < .1            | < .003         | 0.051         | < .1         |                |                |                | 2.98            |                 | 119                          |
| 110           | 7/11/2010   |                | Upland               |                                                      |                                  |                   | < .1            | < .003         | 0.092         | < .1         |                |                |                | 3.62            |                 |                              |
| 111           | 7/13/2010   | Kitchen Sink   | Valley               |                                                      |                                  |                   | < .1            | < .003         | 0.069         | < .1         |                |                |                | 2.39            |                 |                              |
| 112           | 7/13/2010   | Kitchen Sink   | Valley               |                                                      |                                  |                   | < .1            | 0.003          | 0.381         | 0.108        |                |                |                | 11.1            |                 |                              |
| 113           | 7/12/2010   |                | Valley               |                                                      |                                  |                   | < .1            | < .003         | 0.189         | < .1         |                |                |                | 23.5            |                 |                              |
| 114           | 7/25/2011   | Kitchen Sink   | Upland               |                                                      |                                  |                   |                 |                |               |              |                |                |                |                 |                 | 394                          |
| 115           | 8/17/2011   | Bathroom Sink  | Valley               |                                                      |                                  |                   |                 |                |               |              |                |                |                |                 |                 | 332                          |
| 116           | 7/5/2011    |                | Valley               |                                                      |                                  |                   |                 |                |               |              |                |                |                |                 |                 | 228                          |
| 117           | 3/12/2009   | Barn           | Valley               |                                                      |                                  |                   | < .05           |                | 0.721         |              |                |                |                | 11.7            |                 |                              |
| 118           | 2/20/2009   | Basement       | Upland               |                                                      |                                  |                   | < .05           |                | 0.112         |              |                |                |                | 12              |                 |                              |
| 119           | 7/1/2010    |                | Valley               |                                                      |                                  |                   | < .1            | < .003         | 0.041         | < .1         |                |                |                | 4.43            |                 |                              |
| 120           | 7/1/2010    |                | Upland               |                                                      |                                  |                   | < .1            | 0.005          | 0.241         | < .1         |                |                |                | 7.21            |                 |                              |
| 121           | 2/20/2009   |                | Upland               |                                                      |                                  |                   | < .05           |                | 0.136         |              |                |                |                | < 2             |                 |                              |
| 122           | 8/3/2010    | Hand Dug Well  | Upland               |                                                      |                                  |                   | < .1            | < .003         | 0.201         | < .1         |                |                |                | 6.99            |                 | 307                          |
| 123           | 2/20/2009   | Basement       | Valley               |                                                      |                                  |                   | < .05           |                | 0.05          |              |                |                |                | 2.33            |                 |                              |
| 124           | 8/7/2010    | Kitchen Sink   | Upland               |                                                      |                                  |                   | < .1            | < .003         | 1.36          | < .1         |                |                |                | 16.6            |                 | 332                          |
| 125           | 8/7/2010    | Hand Dug Well  | Upland               |                                                      |                                  |                   | 0.147           | 0.004          | 0.044         | < .1         |                |                |                | 2.69            |                 | 225                          |
| 126           | 8/8/2010    | Pressure Tank  | Valley               |                                                      |                                  |                   | <0.1            | <0.003         | 0.134         | <0.1         |                |                |                | 3.65            |                 |                              |
| 127           | 8/8/2010    | Kitchen Sink   | Valley               |                                                      |                                  |                   | < .1            | < .003         | < .025        | 0.105        |                |                |                | 28.1            |                 | 393                          |
| 128           | 8/8/2010    | Bathroom Sink  | Valley               |                                                      |                                  |                   | < .1            | < .003         | < .025        | < .1         |                |                |                | 6.56            |                 | 357                          |
| 129           | 8/8/2010    | Kitchen Sink   | Upland               |                                                      |                                  |                   | < .1            | < .003         | 0.051         | < .1         |                |                |                | 3.81            |                 | 136                          |
| 130           | 7/30/2010   | Bathroom Sink  | Valley               | Yes                                                  |                                  |                   | < .1            | < .003         | 0.462         | < .1         |                |                |                | 3.44            |                 | 184                          |
| 131           | 8/13/2010   | Outside Spigot | Upland               |                                                      |                                  |                   | < .1            | < .003         | 0.202         | < .1         |                |                |                | 3.26            |                 | 157                          |
| 132           | 7/20/2010   | Kitchen Sink   | Valley               |                                                      |                                  |                   | < .1            | < .003         | 0.175         | < .1         |                |                |                | 4.77            |                 | 365                          |
| 133           | 7/20/2010   | Heefer Barn    | Upland               |                                                      |                                  |                   | < .1            | < .003         | 0.113         | < .1         |                |                |                | 8.75            |                 | 317                          |
| 134           | 8/11/2010   | House #2       | Valley               |                                                      |                                  |                   | < .1            | < .003         | < .025        | < .1         |                |                |                | 3.73            |                 | 197                          |
| 135           | 4/15/2009   |                | Upland               |                                                      |                                  |                   | < .1            |                | 0.042         |              |                |                |                | 5.76            |                 |                              |

Table S.8. Groundwater Quality Data for 1701 "Pre-Drill" Water Well Samples from Susquehanna County, Pennsylvania

| Water Well ID | Sample Date | Sampling Port             | Topographic Location | Gas Extraction Area (Within 1 km of Active Gas Well) | Groundwater Type (If Determined) | Alkalinity (mg/L) | Aluminum (mg/L) | Arsenic (mg/L) | Barium (mg/L) | Boron (mg/L) | Bromide (mg/L) | Cadmium (mg/L) | Calcium (mg/L) | Chloride (mg/L) | Chromium (mg/L) | Conductivity - Field (µs/cm) |
|---------------|-------------|---------------------------|----------------------|------------------------------------------------------|----------------------------------|-------------------|-----------------|----------------|---------------|--------------|----------------|----------------|----------------|-----------------|-----------------|------------------------------|
| 136           | 8/11/2010   | Main House Kitchen Sink   | Valley               |                                                      |                                  |                   | < .1            | < .003         | 0.148         | < .1         |                |                |                | 2.89            |                 | 210                          |
| 137           | 8/19/2010   |                           | Upland               | Yes                                                  | Calcium-Bicarbonate              | 90                | < .05           | < .003         | 0.05          |              |                | < .002         | 35.5           | 4.74            | < .005          |                              |
| 138           | 8/19/2010   | Barn Well Milkhouse Sink  | Upland               | Yes                                                  | Calcium-Bicarbonate              | 70                | < .05           | < .003         | 0.055         |              |                | < .002         | 36.7           | 17.2            | < .005          | 238                          |
| 139           | 6/24/2009   | Basement Pressure Tank    | Valley               |                                                      |                                  |                   | < .1            |                | 0.029         |              |                |                |                | 2.66            |                 |                              |
| 140           | 8/19/2010   | Pressure Tank             | Upland               |                                                      | Calcium-Bicarbonate              | 110               | < .034          | 0.005          | 0.143         |              |                | < .002         | 32.9           | 2.51            | < .005          | 224                          |
| 141           | 8/19/2010   | Kitchen Sink              | Upland               | Yes                                                  | Calcium-Bicarbonate              | 130               | 0.068           | < .003         | 0.174         |              |                | < .002         | 52.5           | 6.34            | < .005          | 811                          |
| 142           | 8/19/2010   | Spigot Under Mobile Home  | Upland               | Yes                                                  | Calcium-Bicarbonate              | 105               | < .05           | < .003         | 0.11          |              |                | < .002         | 41             | 9.39            | < .005          | 229                          |
| 143           | 8/20/2010   | Laundry Room Sink         | Upland               |                                                      | Calcium-Bicarbonate-Chloride     | 195               | < .05           | < .003         | 0.639         |              |                | < .002         | 19.7           | 270             | < .005          |                              |
| 144           | 6/24/2009   | Well Head                 | Valley               |                                                      |                                  |                   | < .1            |                | < .025        |              |                |                |                | < 2             |                 |                              |
| 145           | 6/24/2009   | Kitchen Sink              | Valley               |                                                      |                                  |                   | < .1            |                | 0.039         |              |                |                |                | < 2             |                 |                              |
| 146           | 8/26/2010   | Outside Spigot            | Upland               |                                                      | Calcium-Bicarbonate              | 100               | < .05           | < .003         | 0.151         |              |                | < .002         | 42.9           | 39.2            | < .005          | 377                          |
| 147           | 7/29/2010   |                           | Valley               |                                                      |                                  |                   | < .1            | < .003         | 0.133         | < .1         |                |                |                | 3.44            |                 |                              |
| 148           | 7/29/2010   | Kitchen Sink              | Upland               | Yes                                                  |                                  |                   | < .1            | 0.005          | 0.121         | < .1         |                |                |                | 4.36            |                 | 238                          |
| 149           | 8/28/2010   | Pressure Tank             | Valley               |                                                      | Calcium-Bicarbonate              | 180               | < .05           | < .003         | < .122        |              |                | < .002         | < 41.6         | 4.22            | < .005          | 389                          |
| 150           | 8/28/2010   | Outside Spigot            | Valley               |                                                      | Calcium-Sodium Bicarbonate       | 150               | < .05           | < .003         | < .025        |              |                | < .002         | 43.8           | 2.52            | < .005          | 378                          |
| 151           | 9/2/2010    | Kitchen Sink              | Upland               |                                                      | Calcium-Bicarbonate              | 140               | < .05           | < .002         | 0.11          |              |                | < .002         | 49.3           | < 2             | < .005          | 292                          |
| 152           | 6/13/2011   | Kitchen Sink              | Valley               |                                                      |                                  |                   |                 |                |               |              |                |                |                |                 |                 | 152                          |
| 153           | 9/10/2010   | Kitchen Faucet            | Valley               |                                                      | Sodium-Bicarbonate               | 35                |                 | < .003         | 0.153         |              |                | < .002         | 15.5           | 4.05            | < .01           | 300                          |
| 154           | 7/20/2010   | Tenant House Kitchen Sink | Upland               |                                                      |                                  |                   | < .1            | < .003         | 0.246         | < .1         |                |                |                | 4.07            |                 | 258                          |
| 155           | 2/27/2010   | Kitchen Sink              | Upland               |                                                      |                                  |                   | < .1            |                | 0.068         |              |                |                |                | 7.07            |                 | 179.4                        |
| 156           | 2/22/2010   | Basement At Pressure Tank | Valley               |                                                      |                                  |                   | < .1            |                | 1.18          |              |                |                |                | 2.46            |                 |                              |

Table S.8. Groundwater Quality Data for 1701 "Pre-Drill" Water Well Samples from Susquehanna County, Pennsylvania

| Water Well ID | Sample Date | Sampling Port                    | Topographic Location | Gas Extraction Area (Within 1 km of Active Gas Well) | Groundwater Type (If Determined) | Alkalinity (mg/L) | Aluminum (mg/L) | Arsenic (mg/L) | Barium (mg/L) | Boron (mg/L) | Bromide (mg/L) | Cadmium (mg/L) | Calcium (mg/L) | Chloride (mg/L) | Chromium (mg/L) | Conductivity - Field (µs/cm) |
|---------------|-------------|----------------------------------|----------------------|------------------------------------------------------|----------------------------------|-------------------|-----------------|----------------|---------------|--------------|----------------|----------------|----------------|-----------------|-----------------|------------------------------|
| 157           | 9/17/2010   | Kitchen Sink                     | Valley               |                                                      | Sodium-Bicarbonate               | 145               |                 | < .003         | 1.92          |              |                | < .002         | 12.3           | 52.2            | < .005          | 345                          |
| 158           | 1/10/2010   | Basement Pressure Tank           | Upland               |                                                      |                                  |                   | < .1            |                | 0.093         |              |                |                |                | 4.54            |                 | 284                          |
| 159           | 10/3/2010   | Kitchen Sink                     | Valley               | Yes                                                  | Calcium-Bicarbonate              | 160               | < .05           | < .003         | 0.086         |              |                | < .002         | 49.2           | 26.2            | < .005          |                              |
| 160           | 1/31/2011   | Kitchen Sink                     | Upland               |                                                      | Calcium-Bicarbonate              | 70                | < .01           | < .001         | 0.13          |              |                | < .0001        | 24             | 5.71            | < .002          | 131                          |
| 161           | 4/8/2009    | Laundry Sink                     | Upland               |                                                      |                                  |                   | < .05           |                | 0.135         |              |                |                |                | 2.15            |                 |                              |
| 162           | 10/7/2010   | Kitchen Sink                     | Upland               |                                                      |                                  |                   | < .05           | < .003         | 0.083         |              |                | < .002         | 42.8           |                 | < .005          | 237                          |
| 163           | 10/7/2010   | Kitchen Sink                     | Valley               | Yes                                                  |                                  |                   | < .05           | < .003         | 0.031         |              |                | 0.002          | 40             |                 | < .005          | 230                          |
| 164           | 10/7/2010   |                                  | Valley               | Yes                                                  | Calcium-Bicarbonate              | 125               | < .05           | < .003         | 0.11          |              |                | < .002         | 42.8           | 3.15            | < .005          |                              |
| 165           | 4/8/2009    | Boiler Room                      | Upland               |                                                      |                                  |                   | < .05           |                | 0.172         |              |                |                |                | 8.19            |                 |                              |
| 166           | 7/14/2011   | Kitchen Sink                     | Upland               |                                                      |                                  |                   |                 |                |               |              |                |                |                |                 |                 | 296                          |
| 167           | 7/14/2011   | Kitchen Sink                     | Upland               |                                                      |                                  |                   |                 |                |               |              |                |                |                |                 |                 | 281                          |
| 168           | 10/8/2010   | Kitchen Faucet                   | Valley               | Yes                                                  | Calcium-Bicarbonate              | 115               | < .05           | < .002         | 0.128         |              |                | < .002         | 29.7           | 5.02            | < .005          | 274                          |
| 169           | 10/8/2010   | Outside Spigot                   | Valley               | Yes                                                  | Calcium-Bicarbonate              | 130               | < .05           | < .002         | 0.129         |              |                | < .002         | 41.8           | 2.99            | < .005          | 300                          |
| 170           | 7/22/2010   | Pressure Tank                    | Upland               | Yes                                                  |                                  |                   | < .1            | < .003         | 0.971         | < .1         |                |                |                | 3.76            |                 | 243                          |
| 171           | 4/8/2009    | Career & Tech Bldg Pressure Tank | Upland               |                                                      |                                  |                   | < .05           |                | 0.205         |              |                |                |                | 6.13            |                 |                              |
| 172           | 4/8/2009    | Boiler Room                      | Upland               |                                                      |                                  |                   | < .05           |                | 0.127         |              |                |                |                | 7.17            |                 |                              |
| 173           | 10/1/2010   | Kitchen Sink                     | Valley               | Yes                                                  | Sodium-Bicarbonate-Chloride      | 125               | < .05           | < .002         | 0.997         |              |                | < .002         | 12.8           | 56.5            | < .005          | 471                          |
| 174           | 11/5/2009   | Pressure Tank                    | Upland               | Yes                                                  |                                  |                   | < .1            |                | 0.117         |              |                |                |                | 8.16            |                 |                              |
| 175           | 7/14/2011   | Spigot On Side Of House          | Valley               |                                                      |                                  |                   |                 |                |               |              |                |                |                |                 |                 | 214                          |
| 176           | 7/14/2011   | Kitchen Sink                     | Valley               |                                                      |                                  |                   |                 |                |               |              |                |                |                |                 |                 | 185                          |
| 177           | 7/14/2011   | Kitchen Sink                     | Valley               |                                                      |                                  |                   |                 |                |               |              |                |                |                |                 |                 | 198                          |
| 178           | 7/14/2011   | Kitchen Sink                     | Upland               |                                                      |                                  |                   |                 |                |               |              |                |                |                |                 |                 | 194                          |
| 179           | 7/14/2011   | Kitchen Sink                     | Upland               |                                                      |                                  |                   |                 |                |               |              |                |                |                |                 |                 | 178                          |

Table S.8. Groundwater Quality Data for 1701 "Pre-Drill" Water Well Samples from Susquehanna County, Pennsylvania

| Water Well ID | Sample Date | Sampling Port                | Topographic Location | Gas Extraction Area (Within 1 km of Active Gas Well) | Groundwater Type (If Determined)    | Alkalinity (mg/L) | Aluminum (mg/L) | Arsenic (mg/L) | Barium (mg/L) | Boron (mg/L) | Bromide (mg/L) | Cadmium (mg/L) | Calcium (mg/L) | Chloride (mg/L) | Chromium (mg/L) | Conductivity - Field (µs/cm) |
|---------------|-------------|------------------------------|----------------------|------------------------------------------------------|-------------------------------------|-------------------|-----------------|----------------|---------------|--------------|----------------|----------------|----------------|-----------------|-----------------|------------------------------|
| 180           | 10/10/2010  | Kitchen Sink Rental Property | Valley               | Yes                                                  | Calcium-Sodium-Bicarbonate-Chloride | 95                | < .05           | < .002         | 0.027         |              |                | < .002         | 57.3           | 94.3            | < .005          | 616                          |
| 181           | 4/15/2009   | Pressure Tank                | Valley               | Yes                                                  |                                     |                   | < .1            |                | 0.086         |              |                |                |                | 5.62            |                 |                              |
| 182           | 10/10/2010  | Kitchen Sink                 | Valley               | Yes                                                  | Calcium-Bicarbonate                 | 100               | < .05           | < .002         | 0.059         |              |                | < .002         | 37.7           | 13.2            | < .005          | 283                          |
| 183           | 11/4/2010   | Kitchen Sink                 | Valley               |                                                      | Calcium-Bicarbonate                 | 80                | < .01           | < .001         | 0.1           |              |                | < .0001        | 21             | 9.8             | 0.002           | 145                          |
| 184           | 11/4/2010   | Kitchen Sink                 | Upland               |                                                      | Calcium-Sodium-Bicarbonate          | 135               | < .01           | < .001         | 0.15          |              |                | < .0001        | 23             | 4.54            | < .002          | 193                          |
| 185           | 3/12/2009   | Basement Before Filter       | Upland               | Yes                                                  |                                     |                   | < .05           |                | 0.45          |              |                |                |                | 179             |                 |                              |
| 186           | 10/10/2010  | Outside Spigot               | Valley               | Yes                                                  | Calcium-Bicarbonate                 | 100               | < .05           | < .002         | 0.029         |              |                | < .002         | 40.4           | 23.7            | < .005          | 307                          |
| 187           | 11/4/2010   | Pressure Tank                | Valley               |                                                      | Sodium-Bicarbonate                  | 145               | < .01           | < .001         | 0.55          |              |                | < .0001        | 17             | 19.7            | < .002          |                              |
| 188           | 11/6/2010   | Kitchen Sink                 | Valley               | Yes                                                  | Calcium-Bicarbonate                 | 130               | < .01           | < .001         | 0.04          |              |                | < .0001        | 31             | 6.75            | < .002          | 210                          |
| 189           | 11/6/2010   | Outside Spigot               | Valley               |                                                      | Calcium-Bicarbonate                 | 95                | < .01           | < .001         | 0.12          |              |                | 0.0001         | 24             | 17              | < .002          | 180                          |
| 190           | 11/7/2010   | Kitchen Sink                 | Valley               | Yes                                                  | Calcium-Bicarbonate-Chloride        | 155               | < .01           | < .001         | 0.03          |              |                | < .0001        | 56             | 55.5            | < .002          | 488                          |
| 191           | 11/7/2010   | Pressure Tank                | Valley               | Yes                                                  | Calcium-Bicarbonate-Chloride        | 100               | < .01           | < .001         | 0.043         |              |                | < .0001        | 40             | 51.3            | < .002          | 370                          |
| 192           | 11/7/2010   | Kitchen Sink                 | Valley               | Yes                                                  | Calcium-Sodium-Bicarbonate          | 190               | < .01           | < .001         | 0.0088        |              |                | < .0001        | 46             | 18.3            | < .002          | 437                          |
| 193           | 10/13/2010  | Kitchen Faucet               | Valley               | Yes                                                  | Calcium-Bicarbonate                 | 85                | < .05           | < .003         | 0.032         |              |                | < .002         | 43.3           | 28.3            | < .005          | 325                          |
| 194           | 10/13/2010  | Pressure Tank                | Valley               | Yes                                                  | Calcium-Bicarbonate                 | 150               | < .05           | < .003         | 0.123         |              |                | < .002         | 41.2           | 4.57            | < .005          | 324                          |
| 195           | 10/13/2010  | Pressure Tank                | Valley               | Yes                                                  | Calcium-Sodium-Bicarbonate-Chloride | 55                | < .05           | < .002         | 0.062         |              |                | < .002         | 36.1           | 52.8            | < .005          | 378                          |
| 196           | 10/13/2010  | Kitchen Sink                 | Valley               | Yes                                                  | Calcium-Bicarbonate                 | 95                | < .05           | < .003         | 0.071         |              |                | < .002         | 40             | 15.3            | < .005          | 288                          |
| 197           | 10/11/2010  | Kitchen Sink                 | Valley               | Yes                                                  | Calcium-Bicarbonate-Chloride        | 20                | < .05           | < .002         | 0.225         |              |                | < .002         | 13.9           | 19.2            | < .005          | 127                          |
| 198           | 10/18/2010  | Bathroom Sink                | Valley               |                                                      | Calcium-Bicarbonate-Chloride        | 75                | <0.05           | <0.003         | 0.099         |              |                | <0.002         | 52.9           | 53              | <0.005          |                              |
| 199           | 10/2/2010   | Kitchen Sink Faucet          | Upland               |                                                      | Calcium-Sodium-Bicarbonate          | 100               | < .05           | 0.007          | 0.371         |              |                | < .002         | 27.4           | 19              | < .005          | 282                          |



Table S.8. Groundwater Quality Data for 1701 "Pre-Drill" Water Well Samples from Susquehanna County, Pennsylvania

| Water Well ID | Sample Date | Sampling Port          | Topographic Location | Gas Extraction Area (Within 1 km of Active Gas Well) | Groundwater Type (If Determined) | Alkalinity (mg/L) | Aluminum (mg/L) | Arsenic (mg/L) | Barium (mg/L) | Boron (mg/L) | Bromide (mg/L) | Cadmium (mg/L) | Calcium (mg/L) | Chloride (mg/L) | Chromium (mg/L) | Conductivity - Field (µs/cm) |
|---------------|-------------|------------------------|----------------------|------------------------------------------------------|----------------------------------|-------------------|-----------------|----------------|---------------|--------------|----------------|----------------|----------------|-----------------|-----------------|------------------------------|
| 200           | 10/2/2010   | Pressure Tank          | Valley               |                                                      | Calcium-Bicarbonate              | 125               | < .05           | < .003         | 0.065         |              |                | < .002         | 36.5           | 3.9             | < .005          | 278                          |
| 201           | 10/2/2010   | Bathroom Faucet        | Valley               |                                                      | Calcium-Bicarbonate              | 120               | < .05           | < .003         | 0.095         |              |                | < .002         | 32.8           | 4.47            | < .005          |                              |
| 202           | 10/15/2010  | Kitchen Sink           | Valley               | Yes                                                  | Calcium-Bicarbonate              | 95                | < .05           | < .002         | 0.039         |              |                | < .002         | 35.2           | 18.8            | < .005          | 282                          |
| 203           | 4/19/2009   |                        | Valley               | Yes                                                  |                                  |                   | <0.05           |                | <0.025        |              |                |                |                | 78.6            |                 |                              |
| 204           | 4/4/2008    |                        | Upland               |                                                      |                                  |                   | <0.05           |                | <1            |              |                |                |                | 4.11            |                 |                              |
| 205           | 10/19/2010  | Kitchen Sink           | Valley               | Yes                                                  | Calcium-Sodium-Bicarbonate       | 150               | < .05           | 0.004          | 0.313         |              |                | < .002         | 29.1           | 4.45            | < .005          | 327                          |
| 206           | 10/19/2010  | Kitchen Sink           | Valley               | Yes                                                  | Calcium-Bicarbonate              | 75                | < .05           | < .003         | 0.046         |              |                | < .002         | 48.9           | 14.6            | < .005          | 352                          |
| 207           | 10/19/2010  | Hand Dug Well          | Valley               | Yes                                                  | Calcium-Bicarbonate              | 35                | 0.174           | < .003         | 0.028         |              |                | < .002         | 12.2           | 2.13            | < .005          | 97                           |
| 208           | 10/20/2010  | Kitchen Sink           | Valley               | Yes                                                  | Calcium-Bicarbonate              | < 90              | < .05           | < .003         | 0.036         |              |                | < .002         | 39.1           | 15.1            | < .005          | 230                          |
| 209           | 10/26/2010  | Kitchen Sink           | Valley               | Yes                                                  | Calcium-Bicarbonate              | 115               | < .05           | < .003         | < .025        |              |                | < .002         | 40.4           | 19.3            | < .005          | 302                          |
| 210           | 10/26/2010  | Outside Spigot         | Valley               |                                                      | Calcium-Bicarbonate              | 155               | < .05           | < .003         | < .025        |              |                | < .002         | 48             | 2.26            | < .005          | 337                          |
| 211           | 7/14/2011   | Kitchen Sink           | Upland               |                                                      |                                  |                   |                 |                |               |              |                |                |                |                 |                 | 105                          |
| 212           | 8/1/2011    | Kitchen Sink           | Valley               |                                                      |                                  |                   |                 |                |               |              |                |                |                |                 |                 | 191                          |
| 213           | 10/26/2010  |                        | Valley               | Yes                                                  | Calcium-Bicarbonate-Chloride     | 60                | < .05           | < .003         | < .025        |              |                | < .002         | 34.4           | 47.4            | < .005          |                              |
| 214           | 10/28/2010  | Kitchen Sink           | Valley               | Yes                                                  | Calcium-Bicarbonate              | 150               | < .05           | < .003         | < .025        |              |                | < .002         | 44.6           | 23.9            | < .005          |                              |
| 215           | 7/17/2010   | Outside Spigot         | Valley               |                                                      |                                  |                   | < .1            | < .003         | 0.115         | < .1         |                |                |                | 5.96            |                 | 225                          |
| 216           | 10/28/2010  | Basement Pressure Tank | Valley               |                                                      | Calcium-Sodium-Bicarbonate       | 135               | < .05           | 0.004          | 0.153         |              |                | < .002         | 33             | 4.52            | < .005          | 258                          |
| 217           | 10/28/2010  | Pressure Tank          | Upland               |                                                      | Calcium-Bicarbonate              | 130               | < .05           | < .003         | 0.096         |              |                | < .002         | 47             | 3.88            | < .005          | 300                          |
| 218           | 10/28/2010  | Bar Sink               | Upland               |                                                      | Calcium-Bicarbonate              | 35                | < .05           | < .003         | 0.073         |              |                | < .002         | 21.9           | 6.54            | < .005          |                              |
| 219           | 10/29/2010  | Outside Spigot         | Valley               | Yes                                                  | Sodium-Bicarbonate               | 120               | < .05           | 0.009          | 0.153         |              |                | < .002         | 24.4           | 9.17            | < .005          | 289                          |
| 220           | 10/29/2010  |                        | Valley               |                                                      | Calcium-Bicarbonate              | 115               | < .05           | < .003         | 0.16          |              |                | < .002         | 37.4           | 6.56            | < .005          |                              |
| 221           | 10/29/2010  | Outside Sink           | Valley               |                                                      | Calcium-Sodium-Chloride          | 25                | < .05           | < .003         | 0.085         |              |                | < .002         | 27.8           | 51              | < .005          | 346                          |
| 222           | 10/29/2010  | Kitchen Faucet         | Upland               |                                                      | Calcium-Bicarbonate              | 125               | < .05           | < .003         | 0.091         |              |                | < .002         | 41.6           | 5.16            | < .005          | 323                          |
| 223           | 11/10/2010  | Kitchen Sink           | Upland               |                                                      | Calcium-Bicarbonate              | 90                | < .01           | < .001         | 0.19          |              |                | < .0001        | 36             | 4.96            | < .002          | 223                          |

Table S.8. Groundwater Quality Data for 1701 "Pre-Drill" Water Well Samples from Susquehanna County, Pennsylvania

| Water Well ID | Sample Date | Sampling Port             | Topographic Location | Gas Extraction Area (Within 1 km of Active Gas Well) | Groundwater Type (If Determined)    | Alkalinity (mg/L) | Aluminum (mg/L) | Arsenic (mg/L) | Barium (mg/L) | Boron (mg/L) | Bromide (mg/L) | Cadmium (mg/L) | Calcium (mg/L) | Chloride (mg/L) | Chromium (mg/L) | Conductivity - Field (µs/cm) |
|---------------|-------------|---------------------------|----------------------|------------------------------------------------------|-------------------------------------|-------------------|-----------------|----------------|---------------|--------------|----------------|----------------|----------------|-----------------|-----------------|------------------------------|
| 224           | 11/10/2010  | Kitchen Sink              | Valley               |                                                      | Calcium-Bicarbonate                 | 130               | < .01           | < .001         | 0.093         |              |                | < .0001        | 24             | 3.31            | < .002          | 162                          |
| 225           | 9/28/2010   |                           | Upland               |                                                      | Calcium-Bicarbonate-Chloride        | 150               | < .05           | < .002         | 0.102         |              |                | < .002         | 43.2           | 112             | < .005          |                              |
| 226           | 11/11/2010  | Outside Spigot            | Valley               | Yes                                                  | Calcium-Bicarbonate                 | 185               | < .01           | < .001         | 0.14          |              |                | < .0001        | 49             | 3.52            | < .002          | 367                          |
| 227           | 11/11/2010  | Kitchen Faucet            | Valley               | Yes                                                  | Calcium-Bicarbonate                 | 90                | < .01           | < .001         | 0.23          |              |                | < .0001        | 29             | 23.9            | < .002          | 280                          |
| 228           | 9/28/2010   | Kitchen Sink              | Valley               |                                                      | Calcium-Bicarbonate                 | 65                | < .05           | < .002         | < .025        |              |                | < .002         | 29.1           | 7.55            | < .005          | 139                          |
| 229           | 11/17/2010  | Kitchen Sink              | Valley               | Yes                                                  | Calcium-Bicarbonate                 | 155               | 0.012           | 0.0013         | 0.095         |              |                | < .0001        | 40             | 14              | < .002          | 259                          |
| 230           | 11/17/2010  | Kitchen Sink              | Upland               |                                                      | Calcium-Bicarbonate                 | 135               | 0.18            | 0.0051         | 0.3           |              |                | 0.00018        | 56             | 15.7            | 0.02            | 286                          |
| 231           | 11/17/2010  | Kitchen Sink              | Upland               |                                                      | Calcium-Bicarbonate                 | 25                | < .01           | < .001         | 0.043         |              |                | < .0001        | 8.5            | 4.47            | < .002          | 62                           |
| 232           | 12/4/2010   | Kitchen Sink              | Valley               | Yes                                                  | Calcium-Bicarbonate                 | 160               | < .05           | < .003         | 0.13          |              |                | < .002         | 47.2           | 25.1            | < .005          | 323                          |
| 233           | 12/4/2010   | Kitchen Sink              | Valley               | Yes                                                  | Calcium-Bicarbonate-Chloride        | 20                | 0.088           | < .003         | 0.061         |              |                | < .002         | 9.6            | 2.98            | < .005          | 60                           |
| 234           | 12/4/2010   | Basement At Pressure Tank | Valley               | Yes                                                  | Calcium-Bicarbonate                 | 115               | < .05           | < .003         | < .025        |              |                | < .002         | 42.4           | 21.8            | < .005          | 223                          |
| 235           | 12/4/2010   | Kitchen Sink              | Valley               | Yes                                                  | Calcium-Bicarbonate                 | 140               | < .05           | < .003         | 0.102         |              |                | < .002         | 43.8           | 4.23            | < .005          | 245                          |
| 236           | 12/5/2010   | Kitchen Sink              | Upland               | Yes                                                  | Calcium-Bicarbonate-Chloride        | 20                | < .05           | < .003         | 0.109         |              |                | < .002         | 12.8           | 5.1             | < .005          | 110                          |
| 237           | 12/5/2010   | Kitchen Faucet            | Valley               | Yes                                                  | Calcium-Bicarbonate                 | 155               | < .05           | < .003         | 0.131         |              |                | < .002         | 46.8           | 3.87            | < .005          | 336                          |
| 238           | 12/5/2010   | Barn At Ceiling Spigot    | Valley               | Yes                                                  | Calcium-Sodium-Bicarbonate          | 100               | < .05           | 0.004          | < .025        |              |                | < .002         | 29.8           | 15              | < .005          | 280                          |
| 239           | 2/17/2009   | Kitchen Sink              | Valley               | Yes                                                  |                                     |                   | < .05           |                | 0.151         |              |                |                |                | 13.4            |                 |                              |
| 240           | 12/8/2010   | Kitchen Sink              | Valley               | Yes                                                  | Calcium-Bicarbonate                 | 160               | < .01           | 0.0011         | 0.099         |              |                | < .0001        | 44             | 6.75            | < .002          | 267                          |
| 241           | 12/8/2010   | Kitchen Sink              | Upland               |                                                      | Calcium-Sodium-Bicarbonate          | 35                | 0.018           | < .001         | 0.02          |              |                | < .0001        | 12             | 9.07            | < .002          | 109                          |
| 242           | 12/8/2010   | Kitchen Sink              | Valley               | Yes                                                  | Calcium-Bicarbonate                 | 20                | 0.023           | < .001         | 0.048         |              |                | < .0001        | 6.6            | 3.27            | < .002          | 44                           |
| 243           | 12/8/2010   | Hand Dug Well             | Upland               |                                                      | Calcium-Sodium-Bicarbonate-Chloride | 70                | 0.025           | 0.0026         | 0.14          |              |                | 0.00021        | 31             | 28              | < .002          | 201                          |
| 244           | 2/17/2009   | Kitchen Sink              | Valley               | Yes                                                  |                                     |                   | < .05           |                | 0.093         |              |                |                |                | 12.7            |                 |                              |
| 245           | 4/4/2009    | Well Head                 | Valley               | Yes                                                  |                                     |                   | < .05           |                | 0.148         |              |                |                |                | 13.5            |                 |                              |

Table S.8. Groundwater Quality Data for 1701 "Pre-Drill" Water Well Samples from Susquehanna County, Pennsylvania

| Water Well ID | Sample Date | Sampling Port             | Topographic Location | Gas Extraction Area (Within 1 km of Active Gas Well) | Groundwater Type (If Determined)    | Alkalinity (mg/L) | Aluminum (mg/L) | Arsenic (mg/L) | Barium (mg/L) | Boron (mg/L) | Bromide (mg/L) | Cadmium (mg/L) | Calcium (mg/L) | Chloride (mg/L) | Chromium (mg/L) | Conductivity - Field (µs/cm) |
|---------------|-------------|---------------------------|----------------------|------------------------------------------------------|-------------------------------------|-------------------|-----------------|----------------|---------------|--------------|----------------|----------------|----------------|-----------------|-----------------|------------------------------|
| 246           | 12/11/2010  | Kitchen Sink              | Valley               |                                                      | Calcium-Sodium-Bicarbonate          | 70                | < .01           | < .001         | 0.36          |              |                | < .0001        | 17             | < 2             | < .002          | 127                          |
| 247           | 12/11/2010  |                           | Upland               |                                                      | Calcium-Sodium-Bicarbonate-Chloride | 35                | 0.011           | < .001         | 0.096         |              |                | < .0001        | 15             | 15.9            | < .002          |                              |
| 248           | 12/11/2010  | Kitchen Sink              | Valley               |                                                      | Calcium-Bicarbonate                 | 95                | 0.018           | 0.0014         | 0.22          |              |                | < .0001        | 29             | < 2             | < .002          | 152                          |
| 249           | 3/16/2009   | Basement At Pressure Tank | Valley               | Yes                                                  |                                     |                   | < .05           |                | 0.169         |              |                |                |                | 10.5            |                 |                              |
| 250           | 12/17/2010  | Pressure Tank             | Upland               |                                                      | Calcium-Bicarbonate                 | 40                | 0.017           | 0.00083        | 0.076         |              |                | 7.60E-05       | 16             | 5.06            | 0.002           | 129                          |
| 251           | 12/17/2010  | Pressure Tank             | Upland               |                                                      | Calcium-Bicarbonate                 | 40                | 0.052           | 0.0058         | 0.13          |              |                | < .0001        | 17             | 8.49            | < .002          | 139                          |
| 252           | 12/18/2010  | Basement Pressure Tank    | Valley               | Yes                                                  | Calcium-Bicarbonate                 | 175               | < .01           | < .001         | 0.065         |              |                | < .0001        | 44             | 5.86            | < .002          | 253                          |
| 253           | 6/24/2009   | Kitchen Sink              | Upland               | Yes                                                  |                                     |                   | < .1            |                | 0.266         |              |                |                |                | 170             |                 |                              |
| 254           | 12/18/2010  | Kitchen Sink              | Valley               | Yes                                                  | Calcium-Sodium-Bicarbonate          | 120               | < .01           | 0.0087         | 1.2           |              |                | < .0001        | 26             | 13.7            | < .002          | 193                          |
| 255           | 3/19/2009   | Kitchen Sink              | Valley               | Yes                                                  |                                     |                   | < .05           |                | 0.091         |              |                |                |                | 58.6            |                 |                              |
| 256           | 3/19/2009   | Kitchen Sink              | Upland               | Yes                                                  |                                     |                   | < .05           |                | < .025        |              |                |                |                | 5.13            |                 |                              |
| 257           | 12/14/2010  | Kitchen Sink              | Valley               | Yes                                                  | Calcium-Bicarbonate                 | 120               | < .01           | < .001         | 0.076         |              |                | < .0001        | 39             | 4.57            | < .002          | 179                          |
| 258           | 3/4/2009    | Kitchen Sink              | Upland               |                                                      |                                     |                   | < .05           |                | 0.092         |              |                |                |                | 6.92            |                 |                              |
| 259           | 12/14/2010  | Hydrant                   | Valley               | Yes                                                  | Calcium-Bicarbonate                 | 105               | 1.2             | 0.038          | 0.25          |              |                | 0.0017         | 38             | < 2             | 0.0031          | 181                          |
| 260           | 12/14/2010  | Kitchen Sink              | Valley               | Yes                                                  | Calcium-Bicarbonate                 | 130               | < .01           | 0.0012         | 0.2           |              |                | < .0001        | 34             | 8.35            | < .002          | 200                          |
| 261           | 12/14/2010  | Bathtub Faucet            | Valley               | Yes                                                  | Calcium-Bicarbonate-Chloride        | 105               | < .01           | < .001         | 0.059         |              |                | < .0001        | 47             | 36.1            | < .002          | 286                          |
| 262           | 2/23/2011   |                           | Valley               | Yes                                                  | Calcium-Bicarbonate                 | 110               | 0.11            | < .001         | 0.046         |              |                | < .0001        | 32             | 6.72            | < .002          |                              |
| 263           | 12/19/2010  |                           | Valley               | Yes                                                  | Calcium-Bicarbonate                 | 110               | < .01           | < .001         | 0.025         |              |                | < .0001        | 45             | 15.7            | < .002          |                              |
| 264           | 12/19/2010  | Kitchen Sink              | Valley               |                                                      | Calcium-Sodium-Bicarbonate          | 115               | < .01           | < .001         | 1.8           |              |                | < .0001        | 16             | 8.42            | < .002          | 265                          |
| 265           | 12/19/2010  | Kitchen Faucet            | Valley               |                                                      | Calcium-Bicarbonate                 | 40                | 0.011           | < .001         | 0.048         |              |                | < .0001        | 15             | 11.5            | < .002          | 133                          |

Table S.8. Groundwater Quality Data for 1701 "Pre-Drill" Water Well Samples from Susquehanna County, Pennsylvania

| Water Well ID | Sample Date | Sampling Port                                      | Topographic Location | Gas Extraction Area (Within 1 km of Active Gas Well) | Groundwater Type (If Determined) | Alkalinity (mg/L) | Aluminum (mg/L) | Arsenic (mg/L) | Barium (mg/L) | Boron (mg/L) | Bromide (mg/L) | Cadmium (mg/L) | Calcium (mg/L) | Chloride (mg/L) | Chromium (mg/L) | Conductivity - Field (µs/cm) |
|---------------|-------------|----------------------------------------------------|----------------------|------------------------------------------------------|----------------------------------|-------------------|-----------------|----------------|---------------|--------------|----------------|----------------|----------------|-----------------|-----------------|------------------------------|
| 266           | 12/19/2010  | School Art Studio Bathroom Sink                    | Valley               | Yes                                                  | Calcium-Bicarbonate              | 85                | < .01           | < .001         | 0.07          |              |                | < .0001        | 42             | 18.2            | < .002          | 312                          |
| 267           | 2/26/2009   |                                                    | Upland               |                                                      |                                  |                   | <0.05           |                | 0.072         |              |                |                |                | 12.4            |                 |                              |
| 268           | 1/27/2011   | Downstairs Kitchen Sink                            | Valley               |                                                      | Sodium-Bicarbonate               | 140               | < .01           | 0.0033         | 0.071         |              |                | < .0001        | 4.8            | 10.5            | < .002          | 256                          |
| 269           | 1/27/2011   | Kitchen Sink                                       | Valley               |                                                      | Calcium-Bicarbonate              | 75                | < .01           | 0.00041        | 0.056         |              |                | < .0001        | 30             | 5.18            | < .002          | 155                          |
| 270           | 1/27/2011   | Kitchen Sink                                       | Valley               |                                                      | Calcium-Bicarbonate              | 60                | < .01           | < .001         | 0.049         |              |                | < .0001        | 27             | 5.26            | < .002          | 163                          |
| 271           | 3/4/2009    | Kitchen Sink                                       | Upland               |                                                      |                                  |                   | < .05           |                | 0.102         |              |                |                |                | 2.75            |                 |                              |
| 272           | 2/11/2011   | Kitchen Sink                                       | Upland               | Yes                                                  | Calcium-Bicarbonate              | 170               | < .01           | < .001         | 0.11          |              |                | < .0001        | 54             | 5.86            | < .002          | 270                          |
| 273           | 2/11/2011   | Kitchen Sink                                       | Upland               |                                                      | Calcium-Bicarbonate              | 160               | 0.065           | < .001         | 0.22          |              |                | < .0001        | 76             | 52.2            | < .002          | 358                          |
| 274           | 2/11/2011   | Kitchen Sink                                       | Upland               |                                                      | Sodium-Bicarbonate               | 165               | < .01           | < .001         | 0.54          |              |                | < .0001        | 11             | 5.3             | < .002          | 213                          |
| 275           | 2/11/2011   | Kitchen Sink                                       | Upland               | Yes                                                  | Calcium-Bicarbonate              | 195               | < .01           | < .001         | 0.2           |              |                | < .0001        | 71             | 48.1            | < .002          | 441                          |
| 276           | 2/11/2011   | In Milkhouse, At Bottom Of Pressure Tank           | Upland               |                                                      | Calcium-Bicarbonate              | 115               | < .01           | 0.0013         | 0.14          |              |                | < .0001        | 49             | 11.4            | < .002          | 234                          |
| 277           | 2/4/2011    | Pressure Tank                                      | Valley               | Yes                                                  | Calcium-Bicarbonate              | 160               | < .01           | 0.0015         | 0.11          |              |                | < .0001        | 42             | 5.21            | < .002          | 335                          |
| 278           | 2/8/2011    | Bathtub                                            | Valley               |                                                      | Calcium-Bicarbonate              | 110               | < .01           | < .001         | 0.083         |              |                | < .0001        | 47             | 11.1            | < .002          |                              |
| 279           | 3/4/2009    | Kitchen Sink                                       | Upland               |                                                      |                                  |                   | < .05           |                | 0.106         |              |                |                |                | 50.3            |                 |                              |
| 280           | 2/8/2011    | Kitchen Sink                                       | Upland               |                                                      | Calcium-Bicarbonate-Chloride     | 55                | < .01           | < .001         | 0.17          |              |                | < .0001        | 37             | 16.3            | < .002          | 196                          |
| 281           | 10/19/2010  | Kitchen Sink                                       | Valley               | Yes                                                  | Calcium-Bicarbonate              | 115               | 0.05            | < .003         | 0.062         |              |                | < .002         | 38.2           | 6.99            | < .005          | 269                          |
| 282           | 2/8/2011    | Kitchen Sink, Small Spigot On Right Hand Side Of S | Valley               |                                                      | Calcium-Bicarbonate              | 110               | < .01           | < .001         | 0.065         |              |                | < .0001        | 37             | 7.41            | < .002          | 169                          |
| 283           | 2/11/2011   | Kitchen Sink                                       | Upland               | Yes                                                  | Sodium-Bicarbonate               | 195               | < .01           | < .001         | 0.01          |              |                | < .0001        | 7.1            | 26              | < .002          |                              |
| 284           | 2/11/2011   | Kitchen Sink                                       | Upland               |                                                      | Calcium-Bicarbonate              | 110               | < .01           | < .001         | 0.19          |              |                | < .0001        | 35             | 5.49            | < .002          | 161                          |

Table S.8. Groundwater Quality Data for 1701 "Pre-Drill" Water Well Samples from Susquehanna County, Pennsylvania

| Water Well ID | Sample Date | Sampling Port                      | Topographic Location | Gas Extraction Area (Within 1 km of Active Gas Well) | Groundwater Type (If Determined)    | Alkalinity (mg/L) | Aluminum (mg/L) | Arsenic (mg/L) | Barium (mg/L) | Boron (mg/L) | Bromide (mg/L) | Cadmium (mg/L) | Calcium (mg/L) | Chloride (mg/L) | Chromium (mg/L) | Conductivity - Field (µs/cm) |
|---------------|-------------|------------------------------------|----------------------|------------------------------------------------------|-------------------------------------|-------------------|-----------------|----------------|---------------|--------------|----------------|----------------|----------------|-----------------|-----------------|------------------------------|
| 285           | 2/8/2011    | Rental (Adam Vibbard) Kitchen Sink | Upland               |                                                      | Calcium-Bicarbonate                 | 130               | < .01           | < .001         | 0.26          |              |                | < .0001        | 45             | 18.8            | < .002          | 233                          |
| 286           | 2/8/2011    | Kitchen Sink                       | Upland               |                                                      | Calcium-Bicarbonate                 | 70                | < .01           | < .001         | 0.097         |              |                | < .0001        | 25             | 19.7            | < .002          | 151                          |
| 287           | 1/13/2011   | Kitchen Sink                       | Valley               | Yes                                                  |                                     |                   | < .01           |                | 0.26          |              |                |                |                | 4.05            |                 | 188                          |
| 288           | 2/15/2011   | Pressure Tank                      | Upland               |                                                      | Calcium-Bicarbonate                 | 125               | < .01           | < .001         | 0.21          |              |                | < .0001        | 32             | 4.12            | < .002          | 258                          |
| 289           | 2/15/2011   | Laundry Room Faucet                | Upland               |                                                      | Calcium-Sodium-Bicarbonate          | 140               | < .01           | 0.0028         | 0.48          |              |                | < .0001        | 21             | 5.36            | < .002          | 278                          |
| 290           | 3/4/2009    | Kitchen Sink                       | Valley               |                                                      |                                     |                   | < .05           |                | < .025        |              |                |                |                | < 2             |                 |                              |
| 291           | 2/14/2011   | Kitchen Sink                       | Upland               |                                                      | Calcium-Bicarbonate                 | 160               | < .01           | < .001         | 0.27          |              |                | < .0001        | 42             | 4.36            | < .002          | 224                          |
| 292           | 2/15/2011   | Kitchen Faucet                     | Valley               |                                                      | Calcium-Sodium-Bicarbonate-Chloride | 130               | < .01           | < .001         | 0.11          |              |                | < .0001        | 50             | 174             | < .002          | 821                          |
| 293           | 2/14/2011   | Barn Milkhouse Sink                | Valley               |                                                      | Calcium-Bicarbonate                 | 125               | < .01           | < .001         | 0.037         |              |                | < .0001        | 34             | 2.6             | < .002          | 183                          |
| 294           | 2/15/2011   | Milkhouse Faucet                   | Upland               | Yes                                                  | Calcium-Sodium-Bicarbonate          | 110               | < .01           | 0.0049         | 0.18          |              |                | < .0001        | 29             | 12.5            | < .002          | 283                          |
| 295           | 2/15/2011   | 1St Floor Kitchen Faucet           | Upland               | Yes                                                  | Calcium-Bicarbonate                 | 135               | < .01           | < .001         | 0.12          |              |                | < .0001        | 41             | 9.91            | < .002          | 288                          |
| 296           | 2/17/2011   | Pressure Tank In Basement          | Upland               | Yes                                                  | Calcium-Bicarbonate                 | 215               | < .01           | < .001         | 0.049         |              |                | < .0001        | 60             | 7.24            | < .002          | 478                          |
| 297           | 3/4/2009    | 1St Floor Mens Room Sink           | Valley               |                                                      |                                     |                   | < .05           |                | 0.09          |              |                |                |                | 5.02            |                 |                              |
| 298           | 3/21/2011   |                                    | Valley               |                                                      | Sodium-Chloride                     | 85.8              | < .03           | 0.0024         | 5.9           |              |                | < .001         | 40             | 688             | < .002          |                              |
| 299           | 3/21/2011   |                                    | Upland               | Yes                                                  | Calcium-Bicarbonate-Chloride        | 76.7              | < .03           | < .001         | 0.15          |              |                | < .001         | 37.2           | 60.3            | < .002          |                              |
| 300           | 3/22/2011   |                                    | Valley               | Yes                                                  | Calcium-Bicarbonate                 | 119               | < .03           | 0.0072         | 0.33          |              |                | < .001         | 28             | 6.2             | < .002          |                              |
| 301           | 3/4/2009    | Kitchen Sink                       | Valley               |                                                      |                                     |                   | < .05           |                | 0.045         |              |                |                |                | 2.5             |                 |                              |
| 302           | 12/10/2010  | Garage Faucet                      | Upland               | Yes                                                  | Calcium-Bicarbonate                 | 170               | < .01           | 0.001          | 0.072         |              |                | < .0001        | 43             | 6.34            | < .002          | 373                          |
| 303           | 12/10/2010  | Kitchen Faucet                     | Upland               | Yes                                                  | Calcium-Bicarbonate                 | 120               | < .01           | < .001         | 0.11          |              |                | < .0001        | 38             | 2.6             | < .002          | 250                          |

Table S.8. Groundwater Quality Data for 1701 "Pre-Drill" Water Well Samples from Susquehanna County, Pennsylvania

| Water Well ID | Sample Date | Sampling Port             | Topographic Location | Gas Extraction Area (Within 1 km of Active Gas Well) | Groundwater Type (If Determined)    | Alkalinity (mg/L) | Aluminum (mg/L) | Arsenic (mg/L) | Barium (mg/L) | Boron (mg/L) | Bromide (mg/L) | Cadmium (mg/L) | Calcium (mg/L) | Chloride (mg/L) | Chromium (mg/L) | Conductivity - Field (µs/cm) |
|---------------|-------------|---------------------------|----------------------|------------------------------------------------------|-------------------------------------|-------------------|-----------------|----------------|---------------|--------------|----------------|----------------|----------------|-----------------|-----------------|------------------------------|
| 304           | 12/10/2010  | Kitchen Sink              | Valley               | Yes                                                  | Calcium-Bicarbonate                 | 95                | < .01           | < .001         | 0.06          |              |                | < .0001        | 39             | 17.2            | < .002          | 291                          |
| 305           | 12/10/2010  |                           | Upland               | Yes                                                  | Calcium-Bicarbonate                 | 175               | < .01           | 0.0012         | 0.051         |              |                | < .0001        | 38             | < 2             | < .002          | 326                          |
| 306           | 12/10/2010  | Pressure Tank             | Upland               |                                                      | Calcium-Sodium-Bicarbonate-Chloride | 75                | 0.013           | < .001         | 0.017         |              |                | < .0001        | 39             | 41.5            | < .002          | 364                          |
| 307           | 12/10/2010  | Kitchen Faucet            | Valley               |                                                      | Calcium-Bicarbonate                 | 30                | 0.018           | < .001         | 0.017         |              |                | < .0001        | 13             | 2.64            | < .002          | 96                           |
| 308           | 12/14/2010  | Kitchen Sink              | Valley               | Yes                                                  | Calcium-Bicarbonate                 | 110               | < .01           | 0.0011         | 0.029         |              |                | < .0001        | 41             | 7.26            | < .002          | 195                          |
| 309           | 3/12/2009   | Kitchen Sink Faucet       | Upland               |                                                      |                                     |                   | < .05           |                | 0.039         |              |                |                |                | < 2             |                 |                              |
| 310           | 12/20/2010  | Kitchen Sink              | Upland               |                                                      | Calcium-Bicarbonate                 | 160               | 0.05            | < .001         | 0.17          |              |                | < .0001        | 46             | 4.77            | < .002          | 243                          |
| 311           | 12/20/2010  | Pressure Tank             | Valley               |                                                      | Calcium-Sodium-Bicarbonate          | 130               | < .01           | 0.0039         | 0.2           |              |                | < .0001        | 30             | 2.92            | < .002          | 207                          |
| 312           | 12/20/2010  | Basement At Pressure Tank | Valley               |                                                      | Calcium-Bicarbonate                 | 155               | < .01           | < .001         | 0.15          |              |                | < .0001        | 45             | 3.73            | < .002          | 241                          |
| 313           | 12/20/2010  | Kitchen Sink              | Upland               |                                                      | Calcium-Bicarbonate                 | 90                | < .01           | < .001         | 0.24          |              |                | < .001         | 28             | 4.92            | < .002          | 142                          |
| 314           | 12/20/2010  | Kitchen Sink              | Upland               |                                                      | Calcium-Bicarbonate                 | 80                | 0.011           | < .001         | 0.18          |              |                | < .0001        | 27             | 3.79            | < .002          | 135                          |
| 315           | 3/4/2009    | Pressure Tank In Basement | Upland               |                                                      |                                     |                   | < .05           |                | 0.047         |              |                |                |                | 2.2             |                 |                              |
| 316           | 12/20/2010  | Bathtub Faucet            | Upland               |                                                      | Calcium-Bicarbonate                 | 80                | 0.011           | < .001         | 0.23          |              |                | < .0001        | 26             | 3.35            | < .002          | 137                          |
| 317           | 4/15/2009   | Horse Barn Faucet         | Valley               | Yes                                                  |                                     |                   | < .1            |                | 0.075         |              |                |                |                | 4.84            |                 |                              |
| 318           | 1/6/2011    | Kitchen Sink              | Upland               | Yes                                                  | Calcium-Sodium-Bicarbonate          | 120               | 0.011           | < .001         | 0.46          |              |                | < .0001        | 16             | 12.9            | < .002          | 210                          |
| 319           | 4/19/2009   | Kitchen Sink Faucet       | Valley               | Yes                                                  |                                     |                   | < .05           |                | 0.07          |              |                |                |                | 44.3            |                 | 252                          |
| 320           | 4/8/2009    | Barn After Filter         | Valley               |                                                      |                                     |                   | < .05           |                | 0.067         |              |                |                |                | 63.9            |                 |                              |
| 321           | 4/12/2011   | Cwt Of Kitchen Sink       | Valley               |                                                      | Calcium-Bicarbonate                 | 114               | < .03           | < .001         | 0.086         |              |                | < .001         | 36.5           | 10.2            | < .002          | 247                          |
| 322           | 4/13/2011   | Well                      | Upland               | Yes                                                  | Calcium-Sodium-Bicarbonate          | 114               | < .03           | 0.0053         | 0.35          |              |                | < .001         | 27.6           | 15.2            | < .002          |                              |
| 323           | 4/13/2011   | Kitchen Sink              | Valley               | Yes                                                  | Calcium-Bicarbonate                 | 71.3              | < .03           | < .001         | 0.021         |              |                | < .001         | 26.8           | 2               | < .002          | 128                          |
| 324           | 4/13/2011   | Kitchen Sink Cwt          | Upland               |                                                      | Calcium-Bicarbonate                 | 134               | 0.046           | < .001         | 0.095         |              |                | < .001         | 39.3           | 2.9             | < .002          | 225                          |

Table S.8. Groundwater Quality Data for 1701 "Pre-Drill" Water Well Samples from Susquehanna County, Pennsylvania

| Water Well ID | Sample Date | Sampling Port                                | Topographic Location | Gas Extraction Area (Within 1 km of Active Gas Well) | Groundwater Type (If Determined) | Alkalinity (mg/L) | Aluminum (mg/L) | Arsenic (mg/L) | Barium (mg/L) | Boron (mg/L) | Bromide (mg/L) | Cadmium (mg/L) | Calcium (mg/L) | Chloride (mg/L) | Chromium (mg/L) | Conductivity - Field (µs/cm) |
|---------------|-------------|----------------------------------------------|----------------------|------------------------------------------------------|----------------------------------|-------------------|-----------------|----------------|---------------|--------------|----------------|----------------|----------------|-----------------|-----------------|------------------------------|
| 325           | 4/13/2011   | Kitchen Sink Cwt                             | Upland               |                                                      | Calcium-Sodium-Bicarbonate       | 121               | < .03           | 0.0064         | 0.076         |              |                | < .001         | 28             | 15.9            | < .002          | 188                          |
| 326           | 3/12/2009   | Basement Before Filter                       | Upland               | Yes                                                  |                                  |                   | < .05           |                | 0.078         |              |                |                |                | 6.1             |                 |                              |
| 327           | 4/14/2011   | Farmhouse Kitchen Sink Cwt                   | Valley               |                                                      | Calcium-Bicarbonate              | 117               | < .03           | < .001         | 0.11          |              |                | < .001         | 45.1           | 15.1            | < .002          | 273                          |
| 328           | 4/15/2011   | Kitchen Sink Cwt                             | Upland               |                                                      | Calcium-Bicarbonate              | 120               | < .03           | 0.001          | 0.12          |              |                | < .001         | 43.3           | 10.3            | < .002          | 233                          |
| 329           | 4/18/2011   | Pressure Tank In Basement                    | Valley               |                                                      | Calcium-Sodium-Chloride          | 32.1              | < .03           | < .001         | 0.016         |              |                | < .001         | 24.1           | 103             | < .002          | 373                          |
| 330           | 4/18/2011   | Kitchen Sink                                 | Upland               |                                                      | Calcium-Bicarbonate              | 170               | < .03           | < .001         | 0.042         |              |                | < .001         | 63.8           | 10.3            | < .002          |                              |
| 331           | 4/19/2011   | Kitchen Faucet                               | Upland               |                                                      |                                  | 163               | < .03           | < .001         | 0.071         |              | < .02          | < .001         | 42             |                 | < .002          | 155                          |
| 332           | 4/22/2011   | Mary Steele Kitchen Sink                     | Valley               | Yes                                                  | Calcium-Bicarbonate              | 63                | < .03           | < .001         | 0.06          |              |                | < .001         | 27.6           | 18              | < .002          |                              |
| 333           | 4/26/2011   | Kitchen Sink                                 | Valley               | Yes                                                  | Calcium-Bicarbonate              | 117               | < .03           | < .001         | 0.055         |              |                | < .001         | 35.3           | 12.4            | < .002          |                              |
| 334           | 4/27/2011   | Well 2                                       | Upland               | Yes                                                  | Calcium-Bicarbonate              | 151               | < .03           | < .001         | 0.065         |              | < .2           | < .001         | 40.7           | 3.6             | < .002          |                              |
| 335           | 4/28/2011   | Basement Pressure Tank                       | Valley               | Yes                                                  | Calcium-Bicarbonate              | 133               | 0.13            | < .001         | 0.028         |              | < .2           | < .001         | 33.9           | 9.5             | < .002          |                              |
| 336           | 4/28/2011   | Pressure Tank In Basement On E Side Of House | Valley               | Yes                                                  | Calcium-Bicarbonate              | 118               | < .03           | < .001         | 0.031         |              | < .2           | < .001         | 40.7           | 16.3            | < .002          |                              |
| 337           | 5/2/2011    |                                              | Upland               | Yes                                                  |                                  | 104               | <0.03           | 0.002          | 0.1           |              | <0.2           | <0.001         | 38.2           |                 | <0.002          |                              |
| 338           | 5/2/2011    |                                              | Upland               | Yes                                                  | Calcium-Sodium-Chloride          | 28.3              | 0.068           | <0.001         | 0.095         |              | <0.2           | <0.001         | 15             | 39.9            | 0.003           |                              |
| 339           | 5/3/2011    | Kitchen Sink                                 | Valley               | Yes                                                  | Calcium-Bicarbonate              | 107               | < .03           | < .001         | 0.029         |              | < .2           | < .001         | 41.1           | 22.7            | < .002          |                              |
| 340           | 5/4/2011    | Kitchen Cwt                                  | Valley               | Yes                                                  | Calcium-Bicarbonate              | 94.9              | < .03           | < .001         | 0.048         |              | < .2           | < .001         | 31             | 3.8             | < .002          |                              |
| 341           | 5/4/2011    | Kitchen Sink                                 | Valley               | Yes                                                  | Calcium-Bicarbonate              | 93.6              | < .03           | < .001         | 0.12          |              | < .2           | < .001         | 32             | 3.8             | < .002          |                              |
| 342           | 5/4/2011    | Outside Hose Bib On The East Side Of Home    | Valley               | Yes                                                  | Calcium-Bicarbonate              | 155               | < .03           | < .001         | 0.074         |              | < .2           | < .001         | 45.1           | 23.1            | < .002          | 0.347                        |
| 343           | 5/4/2011    | Outdoor Spigot                               | Valley               | Yes                                                  | Calcium-Bicarbonate              | 112               | < .03           | < .001         | 0.04          |              | < .2           | < .001         | 35.8           | 14.5            | < .002          | 249                          |
| 344           | 2/26/2009   | Kitchen Sink                                 | Upland               |                                                      |                                  |                   | < .05           |                | 0.052         |              |                |                |                | 9.07            |                 |                              |

Table S.8. Groundwater Quality Data for 1701 "Pre-Drill" Water Well Samples from Susquehanna County, Pennsylvania

| Water Well ID | Sample Date | Sampling Port                   | Topographic Location | Gas Extraction Area (Within 1 km of Active Gas Well) | Groundwater Type (If Determined)    | Alkalinity (mg/L) | Aluminum (mg/L) | Arsenic (mg/L) | Barium (mg/L) | Boron (mg/L) | Bromide (mg/L) | Cadmium (mg/L) | Calcium (mg/L) | Chloride (mg/L) | Chromium (mg/L) | Conductivity - Field (µs/cm) |
|---------------|-------------|---------------------------------|----------------------|------------------------------------------------------|-------------------------------------|-------------------|-----------------|----------------|---------------|--------------|----------------|----------------|----------------|-----------------|-----------------|------------------------------|
| 345           | 5/4/2011    | School Art Studio Bathroom Sink | Valley               | Yes                                                  | Calcium-Bicarbonate                 | 102               | 0.11            | < .001         | 0.071         |              | < .2           | < .001         | 39             | 28.1            | < .002          |                              |
| 346           | 5/4/2011    | Pressure Tank                   | Valley               | Yes                                                  | Calcium-Bicarbonate                 | 101               | < .03           | < .001         | 0.045         |              | < .2           | < .001         | 37.1           | 25.6            | < .002          |                              |
| 347           | 5/5/2011    | Kitchen Sink Cwt                | Upland               | Yes                                                  | Calcium-Sodium-Bicarbonate          | 219               | < .03           | < .001         | 0.015         |              | < .2           | < .001         | 39.8           | < 1             | < .002          | 0.365                        |
| 348           | 5/5/2011    | Kitchen Sink                    | Valley               | Yes                                                  | Calcium-Sodium-Bicarbonate          | 200               | < .03           | < .001         | 0.01          |              | < .2           | < .001         | 40             | 15.8            | < .002          |                              |
| 349           | 5/5/2011    | Pressure Tank                   | Valley               | Yes                                                  | Calcium-Bicarbonate-Chloride        | 109               | 0.04            | < .001         | 0.023         |              | < .2           | < .001         | 38.5           | 60.4            | < .002          |                              |
| 350           | 5/5/2011    | Kitchen Sink Cwt                | Valley               | Yes                                                  | Calcium-Bicarbonate                 | 123               | < .03           | < .001         | 0.019         |              | < .2           | < .001         | 34.4           | 21.9            | < .002          | 277                          |
| 351           | 5/5/2011    | Pressure Tank                   | Valley               | Yes                                                  | Calcium-Bicarbonate                 | 176               | < .03           | 0.0025         | 0.12          |              | < .2           | < .001         | 43.5           | 2.6             | < .002          | 0.314                        |
| 352           | 5/6/2011    | Pressure Tank                   | Valley               | Yes                                                  | Calcium-Bicarbonate                 | 173               | < .03           | < .001         | 0.043         |              | 0.14           | < .001         | 49             | 18.5            | < .002          | 364                          |
| 353           | 5/6/2011    | Kitchen Sink                    | Valley               | Yes                                                  | Calcium-Bicarbonate                 | 115               | < .03           | < .001         | 0.066         |              | < .2           | < .001         | 35.6           | 6.3             | < .002          |                              |
| 354           | 5/7/2011    | Pressure Tank In Basement       | Valley               | Yes                                                  | Calcium-Bicarbonate                 | 166               | < .03           | 0.0013         | 0.11          |              | < .2           | < .001         | 34.8           | 3.4             | < .002          | 271                          |
| 355           | 5/7/2011    | Bathroom Sink Ctw               | Valley               | Yes                                                  | Calcium-Bicarbonate                 | 178               | < .03           | < .001         | 0.1           |              | < .2           | < .001         | 36.7           | 2.8             | < .002          | 0.298                        |
| 356           | 5/7/2011    | Backroom Sink                   | Valley               | Yes                                                  | Calcium-Bicarbonate                 | 160               | < .03           | < .001         | 0.095         |              | < .2           | < .001         | 34.6           | 2.5             | < .002          |                              |
| 357           | 5/7/2011    | Pressure Tank In Basement       | Upland               | Yes                                                  | Calcium-Bicarbonate                 | 181               | < .03           | < .001         | 0.077         |              | < .2           | < .001         | 36.5           | 2.2             | < .002          | 287                          |
| 358           | 5/7/2011    | Kitchen Sink                    | Valley               | Yes                                                  | Calcium-Bicarbonate                 | 118               | 0.037           | < .001         | 0.067         |              | < .2           | < .001         | 48.4           | 25.6            | < .002          | 260                          |
| 359           | 5/7/2011    | Pressure Tank                   | Valley               | Yes                                                  | Calcium-Bicarbonate                 | 125               | < .03           | < .001         | 0.058         |              | < .2           | < .001         | 42.5           | 18.6            | < .002          |                              |
| 360           | 5/9/2011    | Pressure Tank                   | Valley               | Yes                                                  | Calcium-Bicarbonate-Chloride        | 86.7              | < .03           | 0.0012         | 0.026         |              | < .2           | < .001         | 34.6           | 34.4            | < .002          | 0.277                        |
| 361           | 5/9/2011    | Basement Pressure Tank          | Valley               | Yes                                                  | Calcium-Bicarbonate                 | 123               | < .03           | 0.0012         | 0.023         |              | < .2           | < .001         | 41.4           | 21.3            | < .002          |                              |
| 362           | 5/9/2011    | Well                            | Valley               | Yes                                                  | Calcium-Sodium-Bicarbonate-Chloride | 55.3              | < .03           | < .001         | 0.04          |              | < .2           | < .001         | 18.6           | 30.5            | < .002          |                              |
| 363           | 5/9/2011    | Kitchen Sink                    | Valley               | Yes                                                  | Calcium-Bicarbonate-Chloride        | 122               | < .03           | < .001         | 0.047         |              | < .2           | < .001         | 39.9           | 43.7            | < .002          |                              |



Table S.8. Groundwater Quality Data for 1701 "Pre-Drill" Water Well Samples from Susquehanna County, Pennsylvania

| Water Well ID | Sample Date | Sampling Port                                 | Topographic Location | Gas Extraction Area (Within 1 km of Active Gas Well) | Groundwater Type (If Determined)    | Alkalinity (mg/L) | Aluminum (mg/L) | Arsenic (mg/L) | Barium (mg/L) | Boron (mg/L) | Bromide (mg/L) | Cadmium (mg/L) | Calcium (mg/L) | Chloride (mg/L) | Chromium (mg/L) | Conductivity - Field (µs/cm) |
|---------------|-------------|-----------------------------------------------|----------------------|------------------------------------------------------|-------------------------------------|-------------------|-----------------|----------------|---------------|--------------|----------------|----------------|----------------|-----------------|-----------------|------------------------------|
| 364           | 5/9/2011    | Outdoor Hose Bib On South Side Of Gas Station | Valley               | Yes                                                  | Calcium-Bicarbonate                 | 180               | < .03           | < .001         | 0.061         |              | < .2           | < .001         | 35.6           | 3.9             | < .002          |                              |
| 365           | 5/9/2011    | Outside Spigot                                | Valley               | Yes                                                  | Calcium-Bicarbonate                 | 170               | < .03           | 0.0013         | 0.13          |              | < .2           | < .001         | 40.4           | 2.4             | < .002          | 285                          |
| 366           | 5/9/2011    | Pressure Tank                                 | Upland               | Yes                                                  | Calcium-Bicarbonate-Chloride        | 68.7              | 0.073           | 0.0011         | 0.09          |              | < .2           | < .001         | 27.4           | 37.2            | 0.0049          |                              |
| 367           | 5/9/2011    | Pressure Tank                                 | Valley               | Yes                                                  | Calcium-Sodium-Bicarbonate-Chloride | 62.9              | < .03           | < .001         | 0.061         |              | < .2           | < .001         | 28.7           | 49.5            | < .002          |                              |
| 368           | 5/9/2011    | Outside Faucet                                | Valley               | Yes                                                  | Calcium-Bicarbonate                 | 179               | < .03           | < .001         | 0.06          |              | < .2           | < .001         | 34.7           | 3.7             | < .002          |                              |
| 369           | 5/10/2011   | Kitchen Sink                                  | Upland               | Yes                                                  | Calcium-Sodium-Chloride             | 15.8              | 0.087           | < .001         | 0.055         |              | < .2           | < .001         | 9.1            | 22.4            | < .002          | 140                          |
| 370           | 5/10/2011   | Inside Faucet                                 | Valley               | Yes                                                  | Calcium-Sodium-Bicarbonate-Chloride | 62.1              | < .03           | < .001         | 0.044         |              | < .2           | < .001         | 26.7           | 43.6            | < .002          |                              |
| 371           | 5/10/2011   | Inside Faucet                                 | Valley               | Yes                                                  | Calcium-Bicarbonate                 | 159               | < .03           | < .001         | < .01         |              | < .2           | < .001         | 36             | 10              | < .002          | 339                          |
| 372           | 5/11/2011   |                                               | Valley               | Yes                                                  | Calcium-Sodium-Bicarbonate-Chloride | 32.4              | 0.1             | < .001         | 0.024         |              | < .2           | < .001         | 11.8           | 18.8            | < .002          |                              |
| 373           | 5/11/2011   | Pressure Tank In Basement                     | Valley               | Yes                                                  | Calcium-Bicarbonate                 | 135               | < .03           | < .001         | 0.12          |              | < .2           | < .001         | 43.5           | 27.3            | < .002          | 0.435                        |
| 374           | 5/11/2011   |                                               | Valley               | Yes                                                  | Calcium-Sodium-Bicarbonate-Chloride | 50.9              | < .03           | < .001         | 0.022         |              | < .2           | < .001         | 25.4           | 47.5            | < .002          |                              |
| 375           | 5/11/2011   | Kitchen Sink                                  | Valley               | Yes                                                  | Calcium-Sodium-Bicarbonate-Chloride | 35                | < .03           | < .001         | 0.092         |              | < .2           | < .001         | 16.4           | 32.5            | < .002          |                              |
| 376           | 5/11/2011   | Outside Bib                                   | Valley               | Yes                                                  | Calcium-Bicarbonate                 | 133               | < .03           | < .001         | 0.1           |              | < .2           | < .001         | 38.2           | 36.7            | < .002          | 443                          |
| 377           | 5/11/2011   | Kitchen Sink                                  | Valley               | Yes                                                  | Calcium-Bicarbonate-Chloride        | 76.2              | < .03           | < .001         | 0.079         |              | < .2           | < .001         | 34             | 46.4            | < .002          | 276                          |
| 378           | 5/11/2011   | Pressure Tank In Basement                     | Valley               | Yes                                                  | Calcium-Sodium-Bicarbonate-Chloride | 74.7              | < .03           | < .001         | 0.015         |              | < .2           | < .001         | 32.3           | 61.3            | < .002          |                              |
| 379           | 5/12/2011   |                                               | Valley               | Yes                                                  | Calcium-Bicarbonate                 | 130               | < .03           | < .001         | 0.045         |              | < .2           | < .001         | 34.6           | 19.8            | < .002          |                              |

Table S.8. Groundwater Quality Data for 1701 "Pre-Drill" Water Well Samples from Susquehanna County, Pennsylvania

| Water Well ID | Sample Date | Sampling Port                        | Topographic Location | Gas Extraction Area (Within 1 km of Active Gas Well) | Groundwater Type (If Determined)    | Alkalinity (mg/L) | Aluminum (mg/L) | Arsenic (mg/L) | Barium (mg/L) | Boron (mg/L) | Bromide (mg/L) | Cadmium (mg/L) | Calcium (mg/L) | Chloride (mg/L) | Chromium (mg/L) | Conductivity - Field (µs/cm) |
|---------------|-------------|--------------------------------------|----------------------|------------------------------------------------------|-------------------------------------|-------------------|-----------------|----------------|---------------|--------------|----------------|----------------|----------------|-----------------|-----------------|------------------------------|
| 380           | 5/12/2011   | Outside Faucet                       | Valley               | Yes                                                  | Calcium-Sodium-Bicarbonate-Chloride | 38.9              | < .03           | < .001         | 0.11          |              | < .2           | < .001         | 20.1           | 48.9            | < .002          | 0.299                        |
| 381           | 5/12/2011   | Basement At Pressure Tank            | Valley               | Yes                                                  | Calcium-Bicarbonate                 | 121               | < .03           | < .001         | 0.019         |              | < .2           | < .001         | 32.9           | 17              | < .002          | 260                          |
| 382           | 5/12/2011   | Pressure Tank                        | Valley               | Yes                                                  | Sodium-Chloride                     | 78.6              | < .03           | < .001         | 0.14          |              | 0.17           | < .001         | 65             | 1310            | < .002          |                              |
| 383           | 5/12/2011   | Kitchen Sink                         | Valley               | Yes                                                  | Calcium-Bicarbonate-Chloride        | 85.6              | < .03           | < .001         | 0.03          |              | < .2           | < .001         | 34.4           | 62.8            | < .002          |                              |
| 384           | 5/13/2011   | Pressure Tank Rental Property        | Valley               | Yes                                                  | Calcium-Sodium-Bicarbonate-Chloride | 113               | < .03           | < .001         | 0.018         |              | < .2           | < .001         | 37.2           | 49.3            | < .002          | 334                          |
| 385           | 5/13/2011   | Pressure Tank                        | Valley               | Yes                                                  | Calcium-Bicarbonate                 | 164               | < .03           | < .001         | 0.092         |              | < .2           | < .001         | 38.8           | 1.9             | < .002          | 263                          |
| 386           | 5/13/2011   | Kitchen Sink                         | Valley               | Yes                                                  | Calcium-Sodium-Bicarbonate-Chloride | 39.2              | < .03           | < .001         | 0.11          |              | < .2           | < .001         | 23.4           | 41.3            | < .002          | 0.23                         |
| 387           | 5/13/2011   | Outside Faucet                       | Valley               | Yes                                                  | Calcium-Bicarbonate                 | 201               | < .03           | 0.0012         | 0.24          |              | < .2           | < .001         | 45.2           | 11.5            | < .002          | 363                          |
| 388           | 1/31/2011   | Kitchen Sink                         | Valley               |                                                      | Calcium-Bicarbonate                 | 125               | < .01           | < .001         | 0.12          |              |                | < .0001        | 39             | 4.85            | < .002          | 187                          |
| 389           | 1/8/2011    | Kitchen Sink                         | Upland               | Yes                                                  | Calcium-Bicarbonate                 | 110               | < .01           | 0.0011         | 0.11          |              |                | < .0001        | 39             | 18.5            | < .002          | 196                          |
| 390           | 1/8/2011    | Kitchen Sink                         | Valley               |                                                      | Calcium-Bicarbonate-Chloride        | 15                | 0.05            | < .001         | 0.1           |              |                | < .0001        | 14             | 6.8             | < .002          | 78                           |
| 391           | 1/4/2011    | Kitchen Sink                         | Valley               | Yes                                                  | Calcium-Bicarbonate-Chloride        | 45                | 0.026           | < .001         | 0.09          |              |                | < .0001        | 15             | 16.6            | < .002          |                              |
| 392           | 2/17/2011   | Outside Spigot                       | Upland               |                                                      | Sodium-Bicarbonate                  | 145               | < .01           | 0.013          | 0.074         |              |                | < .0001        | 2.1            | 8.16            | < .002          | 342                          |
| 393           | 2/22/2011   | Kitchen Sink                         | Upland               | Yes                                                  | Calcium-Bicarbonate                 | 145               | < .01           | 0.0011         | 0.17          |              |                | < .0001        | 46             | 42.6            | < .002          | 254                          |
| 394           | 2/22/2011   | Pressure Tank In Barn, Old Milkhouse | Upland               |                                                      | Calcium-Bicarbonate                 | 160               | < .01           | < .001         | 0.094         |              |                | < .0001        | 50             | 22              | < .002          | 300                          |
| 395           | 2/22/2011   | Rental Kitchen Sink                  | Upland               |                                                      | Calcium-Bicarbonate                 | 165               | < .01           | < .001         | 0.094         |              |                | < .0001        | 58             | 34.8            | < .002          | 371                          |
| 396           | 1/8/2011    | Basement At Pressure Tank            | Valley               | Yes                                                  | Calcium-Bicarbonate                 | 75                | 0.13            | < .001         | 0.15          |              |                | 0.00094        | 23             | 5               | < .002          | 132                          |
| 397           | 1/31/2011   | Kitchen Sink                         | Valley               |                                                      | Calcium-Bicarbonate                 | 30                | 0.079           | < .001         | 0.064         |              |                | < .0001        | 10             | 2.65            | < .002          | 58                           |

Table S.8. Groundwater Quality Data for 1701 "Pre-Drill" Water Well Samples from Susquehanna County, Pennsylvania

| Water Well ID | Sample Date | Sampling Port                       | Topographic Location | Gas Extraction Area (Within 1 km of Active Gas Well) | Groundwater Type (If Determined) | Alkalinity (mg/L) | Aluminum (mg/L) | Arsenic (mg/L) | Barium (mg/L) | Boron (mg/L) | Bromide (mg/L) | Cadmium (mg/L) | Calcium (mg/L) | Chloride (mg/L) | Chromium (mg/L) | Conductivity - Field (µs/cm) |
|---------------|-------------|-------------------------------------|----------------------|------------------------------------------------------|----------------------------------|-------------------|-----------------|----------------|---------------|--------------|----------------|----------------|----------------|-----------------|-----------------|------------------------------|
| 398           | 1/9/2011    | Hand Dug Well West Of House         | Upland               | Yes                                                  | Calcium-Bicarbonate-Chloride     | 20                | 0.062           | < .001         | 0.04          |              |                | < .0001        | 9              | 4.04            | < .002          | 76                           |
| 399           | 1/4/2011    | Pressure Tank                       | Upland               |                                                      | Calcium-Bicarbonate              | 125               | < .01           | < .001         | 0.042         | < .0001      |                | < .002         | 38             | 4.5             | < .002          | 190                          |
| 400           | 3/12/2009   | Kitchen Sink                        | Valley               |                                                      |                                  |                   | < .05           |                | 0.31          |              |                |                |                | < 2             |                 |                              |
| 401           | 1/31/2011   | Kitchen Sink                        | Upland               | Yes                                                  | Calcium-Bicarbonate              | 155               | 0.015           | 0.024          | 0.11          |              |                | < .0001        | 50             | 6.91            | < .002          | 223                          |
| 402           | 2/22/2011   | Upstairs Kitchen Sink               | Upland               |                                                      | Calcium-Bicarbonate              | 85                | < .01           | < .001         | 0.12          |              |                | < .0001        | 36             | < 2             | < .002          | 200                          |
| 403           | 1/31/2011   | Kitchen Sink                        | Upland               | Yes                                                  | Calcium-Bicarbonate              | 80                | < .01           | < .001         | 0.1           |              |                | < .0001        | 27             | 5.68            | < .002          | 150                          |
| 404           | 1/31/2011   | Kitchen Sink                        | Upland               |                                                      | Sodium-Bicarbonate               | 155               | < .01           | 0.0026         | 0.27          |              |                | < .0001        | 9.4            | 12.7            | < .002          | 228                          |
| 405           | 1/4/2011    | Hand Dug Well                       | Upland               |                                                      | Calcium-Bicarbonate-Chloride     | 15                | 0.016           | < .001         | 0.01          |              |                | < .0001        | 6.8            | 2.38            | < 2             | 35                           |
| 406           | 2/22/2011   | Basement Of Rental At Pressure Tank | Upland               |                                                      | Calcium-Bicarbonate              | 225               | < .01           | < .001         | 0.16          |              |                | < .0001        | 52             | 10.4            | < .002          | 340                          |
| 407           | 1/8/2011    | Basement At Pressure Tank           | Upland               |                                                      | Calcium-Bicarbonate              | 85                | < .01           | < .001         | 0.045         |              |                | < .0001        | 25             | 6.17            | < .002          | 115                          |
| 408           | 1/8/2011    | Kitchen Sink                        | Upland               |                                                      | Calcium-Bicarbonate              | 70                | < .01           | < .001         | 0.015         |              |                | < .0001        | 27             | 4.23            | < .002          | 125                          |
| 409           | 1/14/2011   | Laundry Room Sink                   | Upland               |                                                      | Calcium-Bicarbonate              | 110               | < .01           | < .001         | 0.073         |              |                | < .0001        | 37             | 5.82            | < .002          | 176                          |
| 410           | 3/12/2009   | Kitchen Sink                        | Valley               |                                                      |                                  |                   | < .05           |                | 0.093         |              |                |                |                | < 2             |                 |                              |
| 411           | 1/31/2011   | Kitchen Sink                        | Valley               |                                                      | Calcium-Sodium-Bicarbonate       | 115               | 0.023           | < .001         | 0.18          |              |                | < .0001        | 19             | 7.24            | < .002          | 160                          |
| 412           | 2/22/2011   | Breakroom Sink- Lower Level         | Upland               |                                                      | Calcium-Bicarbonate              | 185               | < .01           | 0.001          | 0.2           |              |                | < .0001        | 51             | 32.5            | < .002          | 325                          |
| 413           | 3/16/2009   | Kitchen Sink                        | Valley               |                                                      |                                  |                   | < .05           |                | 0.163         |              |                |                |                | < 2             |                 |                              |
| 414           | 1/8/2011    | Kitchen Sink                        | Valley               | Yes                                                  | Calcium-Bicarbonate              | 155               | < .01           | < .001         | 0.017         |              |                | < .0001        | 37             | 3.5             | < .002          | 217                          |
| 415           | 1/4/2011    | Kitchen Sink                        | Upland               |                                                      | Calcium-Bicarbonate              | 45                | 0.022           | < .001         | 0.12          |              |                | < .0001        | 16             | 3.85            | < .002          | 81                           |
| 416           | 1/31/2011   | Kitchen Sink                        | Valley               | Yes                                                  | Calcium-Bicarbonate              | 85                | < .01           | < .001         | 0.14          |              |                | < .0001        | 25             | 4.16            | < .002          | 135                          |
| 417           | 1/10/2011   | Hand Dug Well                       | Upland               |                                                      | Calcium-Bicarbonate              | 35                | 0.026           | < .001         | 0.024         |              |                | 0.00011        | 15             | 5.4             | < .002          | 70                           |
| 418           | 2/22/2011   | Kitchen Sink                        | Valley               |                                                      | Calcium-Bicarbonate              | 105               | 0.017           | 0.0019         | 0.36          |              |                | 0.00021        | 27             | 4.04            | < .002          | 168                          |

Table S.8. Groundwater Quality Data for 1701 "Pre-Drill" Water Well Samples from Susquehanna County, Pennsylvania

| Water Well ID | Sample Date | Sampling Port                                        | Topographic Location | Gas Extraction Area (Within 1 km of Active Gas Well) | Groundwater Type (If Determined) | Alkalinity (mg/L) | Aluminum (mg/L) | Arsenic (mg/L) | Barium (mg/L) | Boron (mg/L) | Bromide (mg/L) | Cadmium (mg/L) | Calcium (mg/L) | Chloride (mg/L) | Chromium (mg/L) | Conductivity - Field (µs/cm) |
|---------------|-------------|------------------------------------------------------|----------------------|------------------------------------------------------|----------------------------------|-------------------|-----------------|----------------|---------------|--------------|----------------|----------------|----------------|-----------------|-----------------|------------------------------|
| 419           | 1/10/2011   | Kitchen Sink                                         | Valley               |                                                      | Calcium-Bicarbonate              | 225               | < .01           | < .001         | 0.16          |              |                | < .0001        | 54             | 3.51            | < .002          | 293                          |
| 420           | 1/4/2011    |                                                      | Upland               |                                                      | Calcium-Bicarbonate              | 60                | < .01           | < .001         | 0.11          |              |                | < .0001        | 23             | 7.61            | < .002          |                              |
| 421           | 2/17/2011   | Kitchen Faucet On 2Nd Floor                          | Upland               |                                                      | Calcium-Bicarbonate              | 80                | < .01           | < .001         | 0.11          |              |                | < .0001        | 26             | 6.91            | < .002          | 190                          |
| 422           | 1/4/2011    |                                                      | Upland               | Yes                                                  | Calcium-Bicarbonate              | 120               | < .01           | < .001         | 3.3           |              |                | < .0001        | 27             | 18.3            | < .002          |                              |
| 423           | 1/7/2011    | Milkhouse Faucet                                     | Valley               | Yes                                                  | Calcium-Bicarbonate              | 115               | < .01           | < .001         | 0.19          |              |                | < .0001        | 34             | 23.3            | < .002          | 307                          |
| 424           | 1/7/2011    | Kitchen Sink Rental                                  | Upland               | Yes                                                  | Calcium-Bicarbonate              | 110               | 0.02            | < .001         | 0.37          |              |                | < .0001        | 34             | 3.46            | < .002          | 227                          |
| 425           | 10/8/2009   |                                                      | Upland               |                                                      |                                  |                   | 1.01            |                | 0.696         |              |                |                |                | 5.04            |                 |                              |
| 426           | 3/13/2009   | Kitchen Sink                                         | Valley               |                                                      |                                  |                   | < .05           |                | 0.806         |              |                |                |                | 20.4            |                 |                              |
| 427           | 3/12/2009   | Kitchen Sink                                         | Upland               |                                                      |                                  |                   | 0.051           |                | 0.062         |              |                |                |                | 2.49            |                 |                              |
| 428           | 6/24/2009   |                                                      | Upland               | Yes                                                  |                                  |                   | < .1            |                | 0.026         |              |                |                |                | 2.15            |                 |                              |
| 429           | 3/4/2009    |                                                      | Upland               |                                                      |                                  |                   | <0.05           |                | 0.106         |              |                |                |                | 50.3            |                 |                              |
| 430           | 6/13/2011   | Barn Spigot                                          | Upland               |                                                      |                                  |                   |                 |                |               |              |                |                |                |                 |                 | 164                          |
| 431           | 6/14/2011   | Kitchen Sink Overlooking Road                        | Upland               |                                                      |                                  |                   |                 |                |               |              |                |                |                |                 |                 | 180                          |
| 432           | 6/14/2011   | Pressure Tank                                        | Valley               |                                                      |                                  |                   |                 |                |               |              |                |                |                |                 |                 | 208                          |
| 433           | 6/16/2011   | Kitchen Sink On Island In Kitchen                    | Valley               |                                                      |                                  |                   |                 |                |               |              |                |                |                |                 |                 | 225                          |
| 434           | 6/16/2011   | Kitchen Sink                                         | Valley               |                                                      |                                  |                   |                 |                |               |              |                |                |                |                 |                 | 160                          |
| 435           | 6/16/2011   | In Barn Milkhouse-At Sink                            | Valley               |                                                      |                                  |                   |                 |                |               |              |                |                |                |                 |                 | 292                          |
| 436           | 6/16/2011   | Outside Spigot- Next To Porch At End Of Driveway     | Upland               |                                                      |                                  |                   |                 |                |               |              |                |                |                |                 |                 | 155                          |
| 437           | 6/16/2011   | Kitchen Sink On Lake Road Side Of House Under Window | Valley               |                                                      |                                  |                   |                 |                |               |              |                |                |                |                 |                 | 221                          |
| 438           | 6/17/2011   | Kitchen Sink                                         | Valley               |                                                      |                                  |                   |                 |                |               |              |                |                |                |                 |                 | 388                          |

Table S.8. Groundwater Quality Data for 1701 "Pre-Drill" Water Well Samples from Susquehanna County, Pennsylvania

| Water Well ID | Sample Date | Sampling Port                                         | Topographic Location | Gas Extraction Area (Within 1 km of Active Gas Well) | Groundwater Type (If Determined) | Alkalinity (mg/L) | Aluminum (mg/L) | Arsenic (mg/L) | Barium (mg/L) | Boron (mg/L) | Bromide (mg/L) | Cadmium (mg/L) | Calcium (mg/L) | Chloride (mg/L) | Chromium (mg/L) | Conductivity - Field (µs/cm) |
|---------------|-------------|-------------------------------------------------------|----------------------|------------------------------------------------------|----------------------------------|-------------------|-----------------|----------------|---------------|--------------|----------------|----------------|----------------|-----------------|-----------------|------------------------------|
| 439           | 6/23/2011   | Kitchen Sink                                          | Valley               |                                                      |                                  |                   |                 |                |               |              |                |                |                |                 |                 |                              |
| 440           | 6/23/2011   | Pressure Tank                                         | Upland               |                                                      |                                  |                   |                 |                |               |              |                |                |                |                 |                 | 194                          |
| 441           | 6/23/2011   | Pressure Tank                                         | Valley               |                                                      |                                  |                   |                 |                |               |              |                |                |                |                 |                 | 194                          |
| 442           | 6/24/2011   |                                                       | Valley               |                                                      |                                  |                   |                 |                |               |              |                |                |                |                 |                 |                              |
| 443           | 6/24/2011   | Kitchen Sink                                          | Upland               |                                                      |                                  |                   |                 |                |               |              |                |                |                |                 |                 | 159                          |
| 444           | 6/24/2011   | Kitchen Sink                                          | Valley               |                                                      |                                  |                   |                 |                |               |              |                |                |                |                 |                 | 252                          |
| 445           | 6/24/2011   | Kitchen Sink                                          | Upland               |                                                      |                                  |                   |                 |                |               |              |                |                |                |                 |                 | 247                          |
| 446           | 6/24/2011   | Shed Spigot                                           | Valley               |                                                      |                                  |                   |                 |                |               |              |                |                |                |                 |                 | 247                          |
| 447           | 6/13/2011   | Kitchen Faucet                                        | Upland               |                                                      |                                  |                   |                 |                |               |              |                |                |                |                 |                 |                              |
| 448           | 6/15/2011   | Kitchen Sink Near Rear Of House                       | Upland               |                                                      |                                  |                   |                 |                |               |              |                |                |                |                 |                 | 125                          |
| 449           | 6/15/2011   | Kitchen Sink On South Side Of House                   | Upland               |                                                      |                                  |                   |                 |                |               |              |                |                |                |                 |                 | 192                          |
| 450           | 6/15/2011   | Kitchen Sink On Wall Closest To Red Barn Behind House | Upland               |                                                      |                                  |                   |                 |                |               |              |                |                |                |                 |                 | 149                          |
| 451           | 6/15/2011   | Kitchen Sink                                          | Valley               |                                                      |                                  |                   |                 |                |               |              |                |                |                |                 |                 | 159                          |
| 452           | 6/15/2011   | Outside Spigot- On The North Side Of The Residence    | Upland               |                                                      |                                  |                   |                 |                |               |              |                |                |                |                 |                 | 113                          |
| 453           | 6/15/2011   |                                                       | Upland               |                                                      |                                  |                   |                 |                |               |              |                |                |                |                 |                 |                              |
| 454           | 3/25/2009   | Kitchen Sink                                          | Upland               |                                                      |                                  |                   | < .05           |                | 0.182         |              |                |                |                | 3.84            |                 |                              |
| 455           | 6/27/2011   | Greenhouse Sink                                       | Valley               |                                                      |                                  |                   |                 |                |               |              |                |                |                |                 |                 | 257                          |
| 456           | 4/15/2009   | Kitchen Sink                                          | Valley               |                                                      |                                  |                   | < .1            |                | 0.083         |              |                |                |                | 4.2             |                 |                              |
| 457           | 4/19/2009   | Basement Pressure Tank                                | Valley               |                                                      |                                  |                   | < .05           |                | 0.065         |              |                |                |                | 4.87            |                 |                              |
| 458           | 6/13/2011   | Outside Hose Bib                                      | Valley               | Yes                                                  | Calcium-Bicarbonate              | 65                | < .03           | < .001         | 0.06          |              | < .2           | < .001         | 22             | 2.9             | < .002          | 0.127                        |

Table S.8. Groundwater Quality Data for 1701 "Pre-Drill" Water Well Samples from Susquehanna County, Pennsylvania

| Water Well ID | Sample Date | Sampling Port                         | Topographic Location | Gas Extraction Area (Within 1 km of Active Gas Well) | Groundwater Type (If Determined) | Alkalinity (mg/L) | Aluminum (mg/L) | Arsenic (mg/L) | Barium (mg/L) | Boron (mg/L) | Bromide (mg/L) | Cadmium (mg/L) | Calcium (mg/L) | Chloride (mg/L) | Chromium (mg/L) | Conductivity - Field (µs/cm) |
|---------------|-------------|---------------------------------------|----------------------|------------------------------------------------------|----------------------------------|-------------------|-----------------|----------------|---------------|--------------|----------------|----------------|----------------|-----------------|-----------------|------------------------------|
| 459           | 6/13/2011   | Outside Cold Water Hose Bib           | Upland               | Yes                                                  | Calcium-Bicarbonate              | 180               | < .03           | < .001         | 0.099         |              | < .2           | < .001         | 43             | < 1             | < .002          | 0.263                        |
| 460           | 6/16/2011   | Bailed Directly From Well             | Upland               |                                                      | Calcium-Bicarbonate              | 38                | 0.25            | 0.0014         | 0.038         |              | < .2           | < .001         | 11             | 2.4             | < .002          | 0.087                        |
| 461           | 2/26/2009   | Mary Steele Kitchen Sink              | Valley               |                                                      |                                  |                   | < .05           |                | 0.058         |              |                |                |                | 23.4            |                 |                              |
| 462           | 6/16/2011   |                                       | Upland               |                                                      |                                  | 75                | <0.03           | <0.001         | 0.066         |              | <0.2           | <0.001         | 21             |                 | <0.002          |                              |
| 463           | 6/20/2011   | Kitchen Sink Cwt On Nw Side Of House  | Upland               |                                                      | Calcium-Bicarbonate              | 58                | < .03           | < .001         | 0.11          |              | < .2           | < .001         | 21             | 5               | < .002          | 0.214                        |
| 464           | 6/20/2011   | Well                                  | Upland               |                                                      | Calcium-Bicarbonate              | 39                | < .03           | < .001         | 0.082         |              | < .2           | < .001         | 15             | 9.4             | < .002          | 0.193                        |
| 465           | 1/25/2009   |                                       | Valley               |                                                      |                                  |                   | < .025          |                | 0.036         |              |                |                |                | 3.74            |                 |                              |
| 466           | 6/20/2011   |                                       | Upland               | Yes                                                  | Calcium-Sodium-Bicarbonate       | 150               | < .03           | 0.0015         | 0.11          |              | < .2           | < .001         | 30             | 2.4             | 0.002           |                              |
| 467           | 6/21/2011   | At Pressure Tank In Basement          | Upland               | Yes                                                  | Calcium-Bicarbonate-Chloride     | 54                | < .03           | < .001         | 0.074         |              | < .2           | < .001         | 20             | 23              | < .002          | 174                          |
| 468           | 6/22/2011   | Inside Hose Bib Located In The Garage | Valley               |                                                      | Calcium-Bicarbonate              | 75                | <0.03           | <0.001         | 0.1           |              | <0.2           | <0.001         | 24             | 1.3             | <0.002          | 0.15                         |
| 469           | 4/1/2009    |                                       | Valley               |                                                      |                                  |                   | < .05           |                | 0.101         |              |                |                |                | 30              |                 |                              |
| 470           | 6/22/2011   | Outside Hose                          | Valley               |                                                      | Calcium-Bicarbonate              | 110               | < .03           | < .001         | 0.1           |              | < .2           | < .001         | 27             | 3.7             | < .002          | 0.185                        |
| 471           | 6/22/2011   | Well                                  | Valley               | Yes                                                  | Calcium-Bicarbonate              | 180               | < .03           | < .001         | 0.044         |              | < .2           | < .001         | 41             | < 1             | < .002          | 0.297                        |
| 472           | 6/22/2011   | Kitchen Sink Cwt                      | Valley               |                                                      | Calcium-Bicarbonate              | 91                | < .03           | < .001         | 0.078         |              | < .2           | < .001         | 21             | < 1             | < .002          | 0.141                        |
| 473           | 6/23/2011   | Pipe In Basement                      | Upland               |                                                      | Calcium-Bicarbonate              | 26                | 0.034           | 0.0011         | 0.027         |              | < .2           | < .001         | 6.9            | < 1             | < .002          | 0.163                        |
| 474           | 4/1/2009    |                                       | Valley               |                                                      |                                  |                   | < .05           |                | 0.183         |              |                |                |                | 135             |                 |                              |
| 475           | 6/23/2011   | Outside Spigot                        | Valley               |                                                      | Calcium-Sodium-Bicarbonate       | 130               | < .03           | 0.0011         | 0.14          |              | < .2           | < .001         | 30             | 4.9             | < .002          | 0.225                        |
| 476           | 4/15/2009   | Kitchen Sink                          | Upland               |                                                      |                                  |                   | < .1            |                | 0.322         |              |                |                |                | 134             |                 |                              |
| 477           | 6/24/2011   | Kitchen Sink                          | Valley               |                                                      | Calcium-Bicarbonate              | 110               | 0.6             | 0.001          | 0.19          |              | < .2           | < .001         | 31             | 1.2             | < .002          | 0.135                        |
| 478           | 6/24/2011   | Outside Hose Bib On The W End Of Home | Valley               | Yes                                                  | Calcium-Bicarbonate-Chloride     | 89                | < .03           | < .001         | 0.015         |              | < .2           | < .001         | 38             | 49              | < .002          | 0.287                        |
| 479           | 4/15/2009   | Kitchen Sink                          | Upland               |                                                      |                                  |                   | < .1            |                | 0.355         |              |                |                |                | 42.2            |                 |                              |

Table S.8. Groundwater Quality Data for 1701 "Pre-Drill" Water Well Samples from Susquehanna County, Pennsylvania

| Water Well ID | Sample Date | Sampling Port                                                                                                                                                      | Topographic Location | Gas Extraction Area (Within 1 km of Active Gas Well) | Groundwater Type (If Determined)    | Alkalinity (mg/L) | Aluminum (mg/L) | Arsenic (mg/L) | Barium (mg/L) | Boron (mg/L) | Bromide (mg/L) | Cadmium (mg/L) | Calcium (mg/L) | Chloride (mg/L) | Chromium (mg/L) | Conductivity - Field (µs/cm) |
|---------------|-------------|--------------------------------------------------------------------------------------------------------------------------------------------------------------------|----------------------|------------------------------------------------------|-------------------------------------|-------------------|-----------------|----------------|---------------|--------------|----------------|----------------|----------------|-----------------|-----------------|------------------------------|
| 480           | 3/16/2009   | Pressure Tank                                                                                                                                                      | Upland               |                                                      |                                     |                   | < .05           |                | 0.16          |              |                |                |                | 3.5             |                 | 268                          |
| 481           | 6/27/2011   | Sample Collected From An Outside Spigot Located On The North Side Of The House.                                                                                    | Valley               |                                                      | Calcium-Sodium-Bicarbonate          | 100               | < .03           | 0.0063         | 0.23          |              |                | < .001         | 18             | < 1             | < .002          | 0.168                        |
| 482           | 6/27/2011   | Kitchen Sink                                                                                                                                                       | Valley               |                                                      | Calcium-Sodium-Bicarbonate          | 82                | < .03           | < .001         | 0.21          |              |                | < .001         | 20             | 2.8             | < .002          | 0.106                        |
| 483           | 6/28/2011   | Dip Sample Directly From Well. Well Is Located On The South End Of Property Inside Of Electric Fence. It Is Covered With Metal Sheeting And An Old Car Hood Frame. | Upland               |                                                      | Calcium-Sodium-Bicarbonate-Chloride | 120               | 0.048           | 0.0014         | 0.069         |              |                |                | 29             | 57              | < .002          | 0.403                        |
| 484           | 6/28/2011   | Kitchen Sink Cwt                                                                                                                                                   | Valley               |                                                      | Calcium-Sodium-Bicarbonate          | 110               | < .03           | < .001         | 0.036         |              |                | < .001         | 20             | 1.4             | < .002          | 0.24                         |
| 485           | 6/29/2011   | Well                                                                                                                                                               | Upland               |                                                      | Calcium-Bicarbonate                 | 40                | 0.35            | 0.0021         | 0.044         |              |                | < .001         | 14             | 2.3             | < .002          | 0.148                        |
| 486           | 6/29/2011   | Laundry Room Sink                                                                                                                                                  | Valley               |                                                      | Calcium-Bicarbonate                 | 110               | < .03           | 0.004          | 0.14          |              |                | < .001         | 26             | 2.5             | < .002          | 0.18                         |
| 487           | 6/29/2011   | Dug Well                                                                                                                                                           | Valley               |                                                      | Calcium-Bicarbonate-Chloride        | 26                | < .03           | < .001         | 0.031         |              |                | < .001         | 11             | 4.2             | < .002          | 0.072                        |
| 488           | 6/29/2011   |                                                                                                                                                                    | Valley               |                                                      | Calcium-Bicarbonate                 | 40                | < .03           | < .001         | 0.039         |              |                | < .001         | 15             | 3.1             | < .002          |                              |
| 489           | 6/30/2011   | Pressure Tank                                                                                                                                                      | Upland               |                                                      | Calcium-Bicarbonate                 | 56                | < .03           | < .001         | 0.033         |              |                | < .001         | 18             | 2               | < .002          | 0.109                        |
| 490           | 7/1/2011    | Outside Hose Bib                                                                                                                                                   | Valley               |                                                      | Calcium-Sodium-Bicarbonate          | 140               | < .03           | 0.0023         | 0.16          |              |                | < .001         | 26             | 1.8             | < .002          | 0.239                        |
| 491           | 2/12/2009   |                                                                                                                                                                    | Valley               |                                                      |                                     |                   | 0.048           |                | 0.15          |              |                |                |                | 2.65            |                 |                              |
| 492           | 5/7/2009    |                                                                                                                                                                    | Valley               |                                                      |                                     |                   | 0.158           |                | 0.073         |              |                |                |                | 6.42            |                 |                              |
| 493           | 4/26/2009   |                                                                                                                                                                    | Valley               |                                                      |                                     |                   | < .05           |                | 0.568         |              |                |                |                | 910             |                 |                              |

Table S.8. Groundwater Quality Data for 1701 "Pre-Drill" Water Well Samples from Susquehanna County, Pennsylvania

| Water Well ID | Sample Date | Sampling Port                                                     | Topographic Location | Gas Extraction Area (Within 1 km of Active Gas Well) | Groundwater Type (If Determined)    | Alkalinity (mg/L) | Aluminum (mg/L) | Arsenic (mg/L) | Barium (mg/L) | Boron (mg/L) | Bromide (mg/L) | Cadmium (mg/L) | Calcium (mg/L) | Chloride (mg/L) | Chromium (mg/L) | Conductivity - Field (µs/cm) |
|---------------|-------------|-------------------------------------------------------------------|----------------------|------------------------------------------------------|-------------------------------------|-------------------|-----------------|----------------|---------------|--------------|----------------|----------------|----------------|-----------------|-----------------|------------------------------|
| 494           | 7/5/2011    | Kitchen Sink                                                      | Valley               |                                                      | Calcium-Bicarbonate                 | 110               | < .03           | < .001         | 0.073         |              | < .2           | < .001         | 32             | 4.3             | < .002          | 0.175                        |
| 495           | 7/5/2011    | Samples Collected By Dipping 1 Inch Plastic Bailer Down The Well. | Upland               |                                                      | Calcium-Bicarbonate                 | 100               | 12              | 0.023          | 0.2           |              | < .2           | < .001         | 27             | 1.6             | 0.016           | 0.181                        |
| 496           | 7/5/2011    | Outside Hose Bib On South Of House                                | Valley               |                                                      | Calcium-Bicarbonate                 | 180               | < .03           | 0.023          | 0.12          |              | < .2           | < .001         | 52             | 7.7             | < .002          | 0.278                        |
| 497           | 7/6/2011    | Pressure Tank In Basement                                         | Upland               |                                                      | Calcium-Bicarbonate                 | 130               | < .03           | < .001         | 0.11          |              | < .2           | < .001         | 41             | 9.6             | < .002          | 0.231                        |
| 498           | 7/8/2011    | Outside Faucet                                                    | Upland               |                                                      | Sodium-Bicarbonate                  | 55                | 0.045           | < .001         | < .01         |              | < .2           | < .001         | < .1           | 5.8             | < .002          | 0.123                        |
| 499           | 5/14/2011   | Kitchen Sink                                                      | Valley               | Yes                                                  | Calcium-Bicarbonate                 | 170               | < .03           | 0.0012         | 0.088         |              | < .2           | < .001         | 39             | 12              | < .002          | 286                          |
| 500           | 5/3/2009    | Bathroom Sink                                                     | Upland               |                                                      |                                     |                   | < .05           |                | 0.103         |              |                |                |                | 16.1            |                 |                              |
| 501           | 5/19/2011   | Outside Spigot                                                    | Valley               | Yes                                                  | Calcium-Sodium-Bicarbonate-Chloride | 58                | < .03           | < .001         | 0.047         |              | < .2           | < .001         | 27             | 32              | < .002          | 0.207                        |
| 502           | 5/25/2011   | Pressure Tank                                                     | Valley               | Yes                                                  | Calcium-Bicarbonate                 | 180               | < .03           | < .001         | 0.07          |              | < .2           | < .001         | 46             | 18              | < .002          | 0.31                         |
| 503           | 5/26/2011   | Pressure Tank                                                     | Valley               | Yes                                                  | Calcium-Bicarbonate                 | 170               | < .03           | < .001         | 0.016         |              | < .2           | < .001         | 56             | 28              | < .002          | 0.359                        |
| 504           | 10/26/2009  |                                                                   | Valley               |                                                      |                                     |                   | < .1            |                | 0.164         |              |                |                |                | 5.89            |                 |                              |
| 505           | 5/26/2011   | Outside Hose Bib Cold                                             | Valley               | Yes                                                  | Calcium-Bicarbonate                 | 100               | < .03           | < .001         | 0.058         |              | < .2           | < .001         | 40             | 23              | < .002          | 0.246                        |
| 506           | 10/26/2009  |                                                                   | Valley               | Yes                                                  |                                     |                   | < .1            |                | 0.237         |              |                |                |                | 9.39            |                 |                              |
| 507           | 6/1/2011    | Outside Hose                                                      | Upland               |                                                      | Calcium-Bicarbonate                 | 200               | < .03           | 0.0013         | 0.047         |              | < .2           | < .001         | 45             | < 1             | 0.0064          | 0.275                        |
| 508           | 6/1/2011    | Pressure Tank                                                     | Valley               |                                                      | Calcium-Bicarbonate                 | 140               | < .03           | < .001         | 0.022         |              | < .2           | < .001         | 37             | 3.7             | < .002          | 0.195                        |
| 509           | 6/2/2011    | Pressure Tank In Old Creamery                                     | Upland               |                                                      | Calcium-Bicarbonate                 | 73                | < .03           | < .001         | 0.051         |              | < .2           | < .001         | 24             | 2.5             | < .002          | 0.131                        |
| 510           | 10/26/2009  | Pressure Tank                                                     | Valley               | Yes                                                  |                                     |                   | < .1            |                | 0.096         |              |                |                |                | < 2             |                 |                              |
| 511           | 6/6/2011    | Dug Well 20 Feet From Se Corner Of House                          | Upland               |                                                      | Calcium-Bicarbonate                 | 170               | < .03           | 0.0032         | 0.039         |              | < .2           | < .001         | 71             | 37              | < .002          | 333                          |
| 512           | 10/26/2009  | Pressure Tank                                                     | Upland               | Yes                                                  |                                     |                   | < .1            |                | 0.101         |              |                |                |                | 30.5            |                 |                              |



Table S.8. Groundwater Quality Data for 1701 "Pre-Drill" Water Well Samples from Susquehanna County, Pennsylvania

| Water Well ID | Sample Date | Sampling Port                                                         | Topographic Location | Gas Extraction Area (Within 1 km of Active Gas Well) | Groundwater Type (If Determined) | Alkalinity (mg/L) | Aluminum (mg/L) | Arsenic (mg/L) | Barium (mg/L) | Boron (mg/L) | Bromide (mg/L) | Cadmium (mg/L) | Calcium (mg/L) | Chloride (mg/L) | Chromium (mg/L) | Conductivity - Field (µs/cm) |
|---------------|-------------|-----------------------------------------------------------------------|----------------------|------------------------------------------------------|----------------------------------|-------------------|-----------------|----------------|---------------|--------------|----------------|----------------|----------------|-----------------|-----------------|------------------------------|
| 513           | 6/13/2011   | Kitchen Sink                                                          | Valley               |                                                      |                                  |                   |                 |                |               |              |                |                |                |                 |                 | 245                          |
| 514           | 6/13/2011   | Hand Dug Well                                                         | Upland               |                                                      |                                  |                   |                 |                |               |              |                |                |                |                 |                 | 151                          |
| 515           | 6/13/2011   | Main Kitchen Sink                                                     | Upland               |                                                      |                                  |                   |                 |                |               |              |                |                |                |                 |                 | 200                          |
| 516           | 6/13/2011   | Basement Pressure Tank                                                | Valley               |                                                      |                                  |                   |                 |                |               |              |                |                |                |                 |                 | 185                          |
| 517           | 6/13/2011   | Exterior Faucet On South Side Of House Between Two Green Garage Doors | Upland               |                                                      |                                  |                   |                 |                |               |              |                |                |                |                 |                 | 156                          |
| 518           | 6/14/2011   | Kitchen Sink                                                          | Valley               |                                                      |                                  |                   |                 |                |               |              |                |                |                |                 |                 | 0.247                        |
| 519           | 6/14/2011   | Kitchen Sink                                                          | Upland               |                                                      |                                  |                   |                 |                |               |              |                |                |                |                 |                 | 242                          |
| 520           | 6/14/2011   | Pressure Tank                                                         | Upland               |                                                      |                                  |                   |                 |                |               |              |                |                |                |                 |                 | 197                          |
| 521           | 6/14/2011   | Kitchen Sink                                                          | Valley               |                                                      |                                  |                   |                 |                |               |              |                |                |                |                 |                 | 146                          |
| 522           | 10/26/2009  | Basement At Pressure Tank                                             | Upland               | Yes                                                  |                                  | < .1              |                 |                | 0.141         |              |                |                |                | 2.42            |                 |                              |
| 523           | 6/14/2011   | Kitchen Faucet                                                        | Valley               |                                                      |                                  |                   |                 |                |               |              |                |                |                |                 |                 |                              |
| 524           | 6/14/2011   | Kitchen Sink                                                          | Valley               |                                                      |                                  |                   |                 |                |               |              |                |                |                |                 |                 | 216                          |
| 525           | 6/14/2011   | Kitchen Sink                                                          | Upland               |                                                      |                                  |                   |                 |                |               |              |                |                |                |                 |                 | 124                          |
| 526           | 6/14/2011   | Kitchen Sink                                                          | Valley               |                                                      |                                  |                   |                 |                |               |              |                |                |                |                 |                 | 192                          |
| 527           | 6/14/2011   | Pressure Tank                                                         | Valley               |                                                      |                                  |                   |                 |                |               |              |                |                |                |                 |                 | 213                          |
| 528           | 6/15/2011   |                                                                       | Upland               |                                                      |                                  |                   |                 |                |               |              |                |                |                |                 |                 |                              |
| 529           | 6/15/2011   | Kitchen Sink                                                          | Upland               |                                                      |                                  |                   |                 |                |               |              |                |                |                |                 |                 | 87                           |
| 530           | 6/15/2011   | Spigot At Well House                                                  | Upland               |                                                      |                                  |                   |                 |                |               |              |                |                |                |                 |                 | 0.34                         |
| 531           | 6/15/2011   | Kitchen Sink                                                          | Upland               |                                                      |                                  |                   |                 |                |               |              |                |                |                |                 |                 | 253                          |
| 532           | 6/15/2011   | Kitchen Sink                                                          | Upland               |                                                      |                                  |                   |                 |                |               |              |                |                |                |                 |                 | 51                           |
| 533           | 6/15/2011   | Kitchen Sink                                                          | Upland               |                                                      |                                  |                   |                 |                |               |              |                |                |                |                 |                 | 325                          |

Table S.8. Groundwater Quality Data for 1701 "Pre-Drill" Water Well Samples from Susquehanna County, Pennsylvania

| Water Well ID | Sample Date | Sampling Port                                          | Topographic Location | Gas Extraction Area (Within 1 km of Active Gas Well) | Groundwater Type (If Determined) | Alkalinity (mg/L) | Aluminum (mg/L) | Arsenic (mg/L) | Barium (mg/L) | Boron (mg/L) | Bromide (mg/L) | Cadmium (mg/L) | Calcium (mg/L) | Chloride (mg/L) | Chromium (mg/L) | Conductivity - Field (µs/cm) |
|---------------|-------------|--------------------------------------------------------|----------------------|------------------------------------------------------|----------------------------------|-------------------|-----------------|----------------|---------------|--------------|----------------|----------------|----------------|-----------------|-----------------|------------------------------|
| 534           | 6/16/2011   | Kitchen Sink                                           | Upland               |                                                      |                                  |                   |                 |                |               |              |                |                |                |                 |                 | 201                          |
| 535           | 6/16/2011   | Pressure Tank                                          | Valley               |                                                      |                                  |                   |                 |                |               |              |                |                |                |                 |                 | 233                          |
| 536           | 6/16/2011   | Kitchen Sink Overlooking Blanding Road                 | Upland               |                                                      |                                  |                   |                 |                |               |              |                |                |                |                 |                 | 117                          |
| 537           | 6/16/2011   | Kitchen Sink On South Side Of House                    | Upland               |                                                      |                                  |                   |                 |                |               |              |                |                |                |                 |                 | 473                          |
| 538           | 6/16/2011   | Kitchen Sink                                           | Upland               |                                                      |                                  |                   |                 |                |               |              |                |                |                |                 |                 | 143                          |
| 539           | 6/16/2011   | Kitchen Sink                                           | Upland               |                                                      |                                  |                   |                 |                |               |              |                |                |                |                 |                 | 200                          |
| 540           | 6/16/2011   | Wellhead From Hose                                     | Upland               |                                                      |                                  |                   |                 |                |               |              |                |                |                |                 |                 | 319                          |
| 541           | 6/16/2011   | Kitchen Sink                                           | Valley               |                                                      |                                  |                   |                 |                |               |              |                |                |                |                 |                 | 307                          |
| 542           | 6/17/2011   | Kitchen Sink                                           | Upland               |                                                      |                                  |                   |                 |                |               |              |                |                |                |                 |                 | 150                          |
| 543           | 6/17/2011   | Pressure Tank In Basement On Tingley Lake Side Of Road | Valley               |                                                      |                                  |                   |                 |                |               |              |                |                |                |                 |                 | 289                          |
| 544           | 6/20/2011   | Pressure Tank                                          | Valley               |                                                      |                                  |                   |                 |                |               |              |                |                |                |                 |                 | 192                          |
| 545           | 6/21/2011   | Kitchen Sink                                           | Valley               |                                                      |                                  |                   |                 |                |               |              |                |                |                |                 |                 | 140                          |
| 546           | 6/21/2011   | Kitchen Sink                                           | Upland               |                                                      |                                  |                   |                 |                |               |              |                |                |                |                 |                 | 177                          |
| 547           | 6/21/2011   | Kitchen Sink                                           | Upland               |                                                      |                                  |                   |                 |                |               |              |                |                |                |                 |                 | 81                           |
| 548           | 4/26/2009   | Kitchen Sink                                           | Valley               |                                                      |                                  |                   | < .05           |                | 0.143         |              |                |                |                | 6.07            |                 |                              |
| 549           | 6/21/2011   | Kitchen Sink                                           | Upland               |                                                      |                                  |                   |                 |                |               |              |                |                |                |                 |                 | 178                          |
| 550           | 6/21/2011   |                                                        | Valley               |                                                      |                                  |                   |                 |                |               |              |                |                |                |                 |                 |                              |
| 551           | 6/22/2011   | Kitchen Sink                                           | Upland               |                                                      |                                  |                   |                 |                |               |              |                |                |                |                 |                 | 127                          |
| 552           | 6/22/2011   | Basement Pressure Tank                                 | Valley               |                                                      |                                  |                   |                 |                |               |              |                |                |                |                 |                 | 235                          |
| 553           | 6/22/2011   | Kitchen Sink                                           | Upland               |                                                      |                                  |                   |                 |                |               |              |                |                |                |                 |                 | 201                          |
| 554           | 6/22/2011   | Kitchen Sink                                           | Valley               |                                                      |                                  |                   |                 |                |               |              |                |                |                |                 |                 | 105                          |

Table S.8. Groundwater Quality Data for 1701 "Pre-Drill" Water Well Samples from Susquehanna County, Pennsylvania

| Water Well ID | Sample Date | Sampling Port              | Topographic Location | Gas Extraction Area (Within 1 km of Active Gas Well) | Groundwater Type (If Determined) | Alkalinity (mg/L) | Aluminum (mg/L) | Arsenic (mg/L) | Barium (mg/L) | Boron (mg/L) | Bromide (mg/L) | Cadmium (mg/L) | Calcium (mg/L) | Chloride (mg/L) | Chromium (mg/L) | Conductivity - Field (µs/cm) |
|---------------|-------------|----------------------------|----------------------|------------------------------------------------------|----------------------------------|-------------------|-----------------|----------------|---------------|--------------|----------------|----------------|----------------|-----------------|-----------------|------------------------------|
| 555           | 6/22/2011   |                            | Upland               |                                                      |                                  |                   |                 |                |               |              |                |                |                |                 |                 |                              |
| 556           | 6/22/2011   | Kitchen Sink               | Upland               |                                                      |                                  |                   |                 |                |               |              |                |                |                |                 |                 | 188                          |
| 557           | 6/23/2011   | Pressure Tank              | Valley               |                                                      |                                  |                   |                 |                |               |              |                |                |                |                 |                 | 231                          |
| 558           | 6/23/2011   | Pressure Tank              | Valley               |                                                      |                                  |                   |                 |                |               |              |                |                |                |                 |                 | 235                          |
| 559           | 6/23/2011   | Kitchen Sink               | Valley               |                                                      |                                  |                   |                 |                |               |              |                |                |                |                 |                 | 156                          |
| 560           | 6/23/2011   | Kitchen Sink               | Valley               |                                                      |                                  |                   |                 |                |               |              |                |                |                |                 |                 | 198                          |
| 561           | 6/23/2011   |                            | Valley               |                                                      |                                  |                   |                 |                |               |              |                |                |                |                 |                 |                              |
| 562           | 6/23/2011   |                            | Upland               |                                                      |                                  |                   |                 |                |               |              |                |                |                |                 |                 |                              |
| 563           | 10/27/2009  | Kitchen Sink - Ann'S House | Valley               | Yes                                                  |                                  |                   | < .1            |                | 0.065         |              |                |                |                | 29.1            |                 |                              |
| 564           | 6/24/2011   | Spigot                     | Upland               |                                                      |                                  |                   |                 |                |               |              |                |                |                |                 |                 | 213                          |
| 565           | 6/24/2011   | Kitchen Sink               | Upland               |                                                      |                                  |                   |                 |                |               |              |                |                |                |                 |                 | 258                          |
| 566           | 6/24/2011   | Kitchen Sink               | Upland               |                                                      |                                  |                   |                 |                |               |              |                |                |                |                 |                 | 102                          |
| 567           | 6/24/2011   | Kitchen Sink               | Upland               |                                                      |                                  |                   |                 |                |               |              |                |                |                |                 |                 | 166                          |
| 568           | 6/24/2011   | Kitchen Sink               | Valley               |                                                      |                                  |                   |                 |                |               |              |                |                |                |                 |                 | 212                          |
| 569           | 6/24/2011   | Kitchen Sink               | Valley               |                                                      |                                  |                   |                 |                |               |              |                |                |                |                 |                 | 242                          |
| 570           | 6/24/2011   | Kitchen Sink               | Upland               |                                                      |                                  |                   |                 |                |               |              |                |                |                |                 |                 | 148                          |
| 571           | 6/24/2011   | Kitchen Sink               | Upland               |                                                      |                                  |                   |                 |                |               |              |                |                |                |                 |                 | 136                          |
| 572           | 6/24/2011   |                            | Upland               |                                                      |                                  |                   |                 |                |               |              |                |                |                |                 |                 |                              |
| 573           | 6/27/2011   | Kitchen Sink               | Valley               |                                                      |                                  |                   |                 |                |               |              |                |                |                |                 |                 | 239                          |
| 574           | 6/27/2011   |                            | Valley               |                                                      |                                  |                   |                 |                |               |              |                |                |                |                 |                 |                              |
| 575           | 6/27/2011   | House Kitchen Sink         | Valley               |                                                      |                                  |                   |                 |                |               |              |                |                |                |                 |                 | 242                          |
| 576           | 6/27/2011   |                            | Valley               |                                                      |                                  |                   |                 |                |               |              |                |                |                |                 |                 | 81                           |
| 577           | 6/27/2011   | Kitchen Sink               | Upland               |                                                      |                                  |                   |                 |                |               |              |                |                |                |                 |                 | 203                          |
| 578           | 6/27/2011   | Kitchen Sink               | Upland               |                                                      |                                  |                   |                 |                |               |              |                |                |                |                 |                 | 145                          |
| 579           | 6/27/2011   | Outside Spigot             | Valley               |                                                      |                                  |                   |                 |                |               |              |                |                |                |                 |                 | 282                          |
| 580           | 6/28/2011   | Kitchen Sink               | Valley               |                                                      |                                  |                   |                 |                |               |              |                |                |                |                 |                 | 230                          |
| 581           | 6/28/2011   |                            | Upland               |                                                      |                                  |                   |                 |                |               |              |                |                |                |                 |                 |                              |
| 582           | 6/28/2011   | Outside Spigot             | Upland               |                                                      |                                  |                   |                 |                |               |              |                |                |                |                 |                 | 216                          |
| 583           | 6/28/2011   |                            | Valley               |                                                      |                                  |                   |                 |                |               |              |                |                |                |                 |                 |                              |

Table S.8. Groundwater Quality Data for 1701 "Pre-Drill" Water Well Samples from Susquehanna County, Pennsylvania

| Water Well ID | Sample Date | Sampling Port          | Topographic Location | Gas Extraction Area (Within 1 km of Active Gas Well) | Groundwater Type (If Determined) | Alkalinity (mg/L) | Aluminum (mg/L) | Arsenic (mg/L) | Barium (mg/L) | Boron (mg/L) | Bromide (mg/L) | Cadmium (mg/L) | Calcium (mg/L) | Chloride (mg/L) | Chromium (mg/L) | Conductivity - Field (µs/cm) |
|---------------|-------------|------------------------|----------------------|------------------------------------------------------|----------------------------------|-------------------|-----------------|----------------|---------------|--------------|----------------|----------------|----------------|-----------------|-----------------|------------------------------|
| 584           | 6/28/2011   | Kitchen Sink           | Upland               |                                                      |                                  |                   |                 |                |               |              |                |                |                |                 |                 | 253                          |
| 585           | 6/28/2011   |                        | Valley               |                                                      |                                  |                   |                 |                |               |              |                |                |                |                 |                 |                              |
| 586           | 10/27/2009  | Pressure Tank          | Upland               |                                                      |                                  |                   | < .1            |                | 0.071         |              |                |                |                | 19.6            |                 |                              |
| 587           | 6/28/2011   | Kitchen Sink           | Valley               |                                                      |                                  |                   |                 |                |               |              |                |                |                |                 |                 | 230                          |
| 588           | 6/28/2011   | Basement Pressure Tank | Upland               |                                                      |                                  |                   |                 |                |               |              |                |                |                |                 |                 | 394                          |
| 589           | 6/29/2011   | Well Spigot            | Upland               |                                                      |                                  |                   |                 |                |               |              |                |                |                |                 |                 | 342                          |
| 590           | 6/29/2011   |                        | Valley               |                                                      |                                  |                   |                 |                |               |              |                |                |                |                 |                 |                              |
| 591           | 6/29/2011   |                        | Upland               |                                                      |                                  |                   |                 |                |               |              |                |                |                |                 |                 |                              |
| 592           | 6/29/2011   |                        | Valley               |                                                      |                                  |                   |                 |                |               |              |                |                |                |                 |                 |                              |
| 593           | 6/29/2011   |                        | Valley               |                                                      |                                  |                   |                 |                |               |              |                |                |                |                 |                 |                              |
| 594           | 6/29/2011   |                        | Upland               |                                                      |                                  |                   |                 |                |               |              |                |                |                |                 |                 |                              |
| 595           | 6/29/2011   | House Spigot           | Valley               |                                                      |                                  |                   |                 |                |               |              |                |                |                |                 |                 | 237                          |
| 596           | 6/29/2011   | Kitchen Sink (Dennis)  | Upland               |                                                      |                                  |                   |                 |                |               |              |                |                |                |                 |                 | 275                          |
| 597           | 6/30/2011   | Kitchen Sink           | Valley               |                                                      |                                  |                   |                 |                |               |              |                |                |                |                 |                 | 213                          |
| 598           | 10/27/2009  | Pressure Tank          | Valley               |                                                      |                                  |                   | < .1            |                | 0.165         |              |                |                |                | 5.12            |                 |                              |
| 599           | 6/30/2011   | Pressure Tank          | Valley               |                                                      |                                  |                   |                 |                |               |              |                |                |                |                 |                 | 154                          |
| 600           | 6/30/2011   |                        | Valley               |                                                      |                                  |                   |                 |                |               |              |                |                |                |                 |                 |                              |
| 601           | 6/30/2011   | Kitchen Sink           | Upland               |                                                      |                                  |                   |                 |                |               |              |                |                |                |                 |                 | 94                           |
| 602           | 6/30/2011   | Pressure Tank          | Valley               |                                                      |                                  |                   |                 |                |               |              |                |                |                |                 |                 | 343                          |
| 603           | 6/30/2011   |                        | Valley               |                                                      |                                  |                   |                 |                |               |              |                |                |                |                 |                 |                              |
| 604           | 6/30/2011   |                        | Valley               |                                                      |                                  |                   |                 |                |               |              |                |                |                |                 |                 |                              |
| 605           | 6/30/2011   |                        | Valley               |                                                      |                                  |                   |                 |                |               |              |                |                |                |                 |                 |                              |
| 606           | 6/30/2011   | Sink In Bays Of Garage | Upland               |                                                      |                                  |                   |                 |                |               |              |                |                |                |                 |                 | 347                          |
| 607           | 10/27/2009  | Pressure Tank          | Upland               |                                                      |                                  |                   | < .1            |                | 0.182         |              |                |                |                | 7.01            |                 |                              |
| 608           | 6/30/2011   | Basement Pressure Tank | Valley               |                                                      |                                  |                   |                 |                |               |              |                |                |                |                 |                 | 160                          |
| 609           | 6/30/2011   | Outside Spigot         | Upland               |                                                      |                                  |                   |                 |                |               |              |                |                |                |                 |                 | 145                          |
| 610           | 6/30/2011   |                        | Upland               |                                                      |                                  |                   |                 |                |               |              |                |                |                |                 |                 | 130                          |
| 611           | 6/30/2011   | Kitchen Sink           | Upland               |                                                      |                                  |                   |                 |                |               |              |                |                |                |                 |                 |                              |
| 612           | 6/30/2011   | Sink In Barn           | Valley               |                                                      |                                  |                   |                 |                |               |              |                |                |                |                 |                 | 285                          |
| 613           | 7/1/2011    | Kitchen Sink           | Upland               |                                                      |                                  |                   |                 |                |               |              |                |                |                |                 |                 | 87                           |

Table S.8. Groundwater Quality Data for 1701 "Pre-Drill" Water Well Samples from Susquehanna County, Pennsylvania

| Water Well ID | Sample Date | Sampling Port          | Topographic Location | Gas Extraction Area (Within 1 km of Active Gas Well) | Groundwater Type (If Determined) | Alkalinity (mg/L) | Aluminum (mg/L) | Arsenic (mg/L) | Barium (mg/L) | Boron (mg/L) | Bromide (mg/L) | Cadmium (mg/L) | Calcium (mg/L) | Chloride (mg/L) | Chromium (mg/L) | Conductivity - Field (µs/cm) |
|---------------|-------------|------------------------|----------------------|------------------------------------------------------|----------------------------------|-------------------|-----------------|----------------|---------------|--------------|----------------|----------------|----------------|-----------------|-----------------|------------------------------|
| 614           | 7/1/2011    | Kitchen Sink           | Upland               |                                                      |                                  |                   |                 |                |               |              |                |                |                |                 |                 | 77                           |
| 615           | 7/1/2011    | Kitchen Sink           | Upland               |                                                      |                                  |                   |                 |                |               |              |                |                |                |                 |                 |                              |
| 616           | 7/1/2011    | Kitchen Sink           | Upland               |                                                      |                                  |                   |                 |                |               |              |                |                |                |                 |                 | 87                           |
| 617           | 7/1/2011    | Kitchen Sink           | Valley               |                                                      |                                  |                   |                 |                |               |              |                |                |                |                 |                 | 193                          |
| 618           | 7/1/2011    | Outside Spigot         | Upland               |                                                      |                                  |                   |                 |                |               |              |                |                |                |                 |                 | 186                          |
| 619           | 7/1/2011    |                        | Valley               |                                                      |                                  |                   |                 |                |               |              |                |                |                |                 |                 |                              |
| 620           | 7/1/2011    | Outside Spigot         | Valley               |                                                      |                                  |                   |                 |                |               |              |                |                |                |                 |                 |                              |
| 621           | 7/1/2011    | Wellhead Spigot        | Valley               |                                                      |                                  |                   |                 |                |               |              |                |                |                |                 |                 |                              |
| 622           | 7/5/2011    | Bathroom Sink          | Valley               |                                                      |                                  |                   |                 |                |               |              |                |                |                |                 |                 | 177                          |
| 623           | 7/5/2011    | Kitchen Sink           | Upland               |                                                      |                                  |                   |                 |                |               |              |                |                |                |                 |                 | 217                          |
| 624           | 7/5/2011    | Basement Pressure Tank | Upland               |                                                      |                                  |                   |                 |                |               |              |                |                |                |                 |                 | 0.143                        |
| 625           | 7/5/2011    |                        | Valley               |                                                      |                                  |                   |                 |                |               |              |                |                |                |                 |                 |                              |
| 626           | 7/5/2011    | Kitchen Sink           | Valley               |                                                      |                                  |                   |                 |                |               |              |                |                |                |                 |                 | 168                          |
| 627           | 10/27/2009  | Pressure Tank          | Valley               |                                                      |                                  |                   | < .1            |                | 0.851         |              |                |                |                | 19.4            |                 |                              |
| 628           | 7/5/2011    | Kitchen Sink           | Upland               |                                                      |                                  |                   |                 |                |               |              |                |                |                |                 |                 | 224                          |
| 629           | 7/5/2011    | Outside Spigot         | Valley               |                                                      |                                  |                   |                 |                |               |              |                |                |                |                 |                 |                              |
| 630           | 7/5/2011    | Kitchen Sink           | Upland               |                                                      |                                  |                   |                 |                |               |              |                |                |                |                 |                 |                              |
| 631           | 7/5/2011    | Kitchen Sink           | Valley               |                                                      |                                  |                   |                 |                |               |              |                |                |                |                 |                 |                              |
| 632           | 7/5/2011    | Outside Spigot         | Valley               |                                                      |                                  |                   |                 |                |               |              |                |                |                |                 |                 |                              |
| 633           | 7/5/2011    | Kitchen Sink           | Valley               |                                                      |                                  |                   |                 |                |               |              |                |                |                |                 |                 |                              |
| 634           | 7/5/2011    | Kitchen Sink           | Valley               |                                                      |                                  |                   |                 |                |               |              |                |                |                |                 |                 | 95                           |
| 635           | 7/5/2011    | Kitchen Sink Main Camp | Valley               |                                                      |                                  |                   |                 |                |               |              |                |                |                |                 |                 | 122                          |
| 636           | 7/5/2011    | Pressure Tank          | Valley               |                                                      |                                  |                   |                 |                |               |              |                |                |                |                 |                 | 0.25                         |
| 637           | 7/5/2011    | Kitchen Sink           | Upland               |                                                      |                                  |                   |                 |                |               |              |                |                |                |                 |                 |                              |
| 638           | 7/5/2011    | Kitchen Faucet         | Valley               |                                                      |                                  |                   |                 |                |               |              |                |                |                |                 |                 |                              |

Table S.8. Groundwater Quality Data for 1701 "Pre-Drill" Water Well Samples from Susquehanna County, Pennsylvania

| Water Well ID | Sample Date | Sampling Port             | Topographic Location | Gas Extraction Area (Within 1 km of Active Gas Well) | Groundwater Type (If Determined) | Alkalinity (mg/L) | Aluminum (mg/L) | Arsenic (mg/L) | Barium (mg/L) | Boron (mg/L) | Bromide (mg/L) | Cadmium (mg/L) | Calcium (mg/L) | Chloride (mg/L) | Chromium (mg/L) | Conductivity - Field (µs/cm) |
|---------------|-------------|---------------------------|----------------------|------------------------------------------------------|----------------------------------|-------------------|-----------------|----------------|---------------|--------------|----------------|----------------|----------------|-----------------|-----------------|------------------------------|
| 639           | 7/5/2011    | Kitchen Sink              | Valley               |                                                      |                                  |                   |                 |                |               |              |                |                |                |                 |                 | 271                          |
| 640           | 7/5/2011    | Kitchen Sink              | Upland               |                                                      |                                  |                   |                 |                |               |              |                |                |                |                 |                 | 266                          |
| 641           | 7/5/2011    | Kitchen Sink              | Upland               |                                                      |                                  |                   |                 |                |               |              |                |                |                |                 |                 | 320                          |
| 642           | 7/6/2011    | Kitchen Sink              | Upland               |                                                      |                                  |                   |                 |                |               |              |                |                |                |                 |                 | 300                          |
| 643           | 7/6/2011    | Kitchen Sink              | Valley               |                                                      |                                  |                   |                 |                |               |              |                |                |                |                 |                 | 183                          |
| 644           | 7/6/2011    | Kitchen Sink              | Upland               |                                                      |                                  |                   |                 |                |               |              |                |                |                |                 |                 | 231                          |
| 645           | 7/6/2011    |                           | Upland               |                                                      |                                  |                   |                 |                |               |              |                |                |                |                 |                 |                              |
| 646           | 7/6/2011    | Farm Sink                 | Valley               |                                                      |                                  |                   |                 |                |               |              |                |                |                |                 |                 |                              |
| 647           | 7/6/2011    |                           | Upland               |                                                      |                                  |                   |                 |                |               |              |                |                |                |                 |                 |                              |
| 648           | 7/6/2011    | Kitchen Sink              | Valley               |                                                      |                                  |                   |                 |                |               |              |                |                |                |                 |                 | 249                          |
| 649           | 7/6/2011    |                           | Valley               |                                                      |                                  |                   |                 |                |               |              |                |                |                |                 |                 |                              |
| 650           | 7/6/2011    | Kitchen Sink              | Valley               |                                                      |                                  |                   |                 |                |               |              |                |                |                |                 |                 | 170                          |
| 651           | 7/6/2011    | Kitchen Sink              | Valley               |                                                      |                                  |                   |                 |                |               |              |                |                |                |                 |                 | 175                          |
| 652           | 7/6/2011    | Basement Pressure Tank    | Valley               |                                                      |                                  |                   |                 |                |               |              |                |                |                |                 |                 | 154                          |
| 653           | 7/6/2011    | House Well                | Upland               |                                                      |                                  |                   |                 |                |               |              |                |                |                |                 |                 | 186                          |
| 654           | 7/6/2011    | Outside Spigot            | Valley               |                                                      |                                  |                   |                 |                |               |              |                |                |                |                 |                 | 276                          |
| 655           | 7/7/2011    | Pressure Tank In Basement | Upland               |                                                      |                                  |                   |                 |                |               |              |                |                |                |                 |                 | 260                          |
| 656           | 7/7/2011    | Kitchen Sink              | Upland               |                                                      |                                  |                   |                 |                |               |              |                |                |                |                 |                 | 0.181                        |
| 657           | 7/7/2011    | Outside Faucet            | Upland               |                                                      |                                  |                   |                 |                |               |              |                |                |                |                 |                 | 162                          |
| 658           | 7/7/2011    | Kitchen Sink              | Valley               |                                                      |                                  |                   |                 |                |               |              |                |                |                |                 |                 | 142                          |
| 659           | 7/7/2011    | Kitchen Sink              | Upland               |                                                      |                                  |                   |                 |                |               |              |                |                |                |                 |                 | 149                          |
| 660           | 7/7/2011    | Kitchen Sink              | Upland               |                                                      |                                  |                   |                 |                |               |              |                |                |                |                 |                 |                              |
| 661           | 7/7/2011    | Outside Faucet            | Valley               |                                                      |                                  |                   |                 |                |               |              |                |                |                |                 |                 |                              |
| 662           | 7/7/2011    | Garage Spigot             | Valley               |                                                      |                                  |                   |                 |                |               |              |                |                |                |                 |                 |                              |
| 663           | 7/7/2011    | Kitchen Sink              | Valley               |                                                      |                                  |                   |                 |                |               |              |                |                |                |                 |                 | 97                           |
| 664           | 7/7/2011    | Pressure Tank             | Upland               |                                                      |                                  |                   |                 |                |               |              |                |                |                |                 |                 | 193                          |
| 665           | 7/7/2011    | Kitchen Sink              | Upland               |                                                      |                                  |                   |                 |                |               |              |                |                |                |                 |                 | 131                          |

Table S.8. Groundwater Quality Data for 1701 "Pre-Drill" Water Well Samples from Susquehanna County, Pennsylvania

| Water Well ID | Sample Date | Sampling Port              | Topographic Location | Gas Extraction Area (Within 1 km of Active Gas Well) | Groundwater Type (If Determined) | Alkalinity (mg/L) | Aluminum (mg/L) | Arsenic (mg/L) | Barium (mg/L) | Boron (mg/L) | Bromide (mg/L) | Cadmium (mg/L) | Calcium (mg/L) | Chloride (mg/L) | Chromium (mg/L) | Conductivity - Field (µs/cm) |
|---------------|-------------|----------------------------|----------------------|------------------------------------------------------|----------------------------------|-------------------|-----------------|----------------|---------------|--------------|----------------|----------------|----------------|-----------------|-----------------|------------------------------|
| 666           | 7/7/2011    | Kitchen Sink               | Valley               |                                                      |                                  |                   |                 |                |               |              |                |                |                |                 |                 |                              |
| 667           | 7/7/2011    | Kitchen Sink               | Upland               |                                                      |                                  |                   |                 |                |               |              |                |                |                |                 |                 | 108                          |
| 668           | 7/7/2011    | Kitchen Sink               | Upland               |                                                      |                                  |                   |                 |                |               |              |                |                |                |                 |                 | 255                          |
| 669           | 7/7/2011    | Bunk House Sink            | Upland               |                                                      |                                  |                   |                 |                |               |              |                |                |                |                 |                 | 0.261                        |
| 670           | 7/7/2011    | Spigot At Well Head        | Valley               |                                                      |                                  |                   |                 |                |               |              |                |                |                |                 |                 | 143                          |
| 671           | 7/8/2011    | Kitchen Sink               | Valley               |                                                      |                                  |                   |                 |                |               |              |                |                |                |                 |                 | 207                          |
| 672           | 7/8/2011    | Kitchen Faucet             | Upland               |                                                      |                                  |                   |                 |                |               |              |                |                |                |                 |                 | 184                          |
| 673           | 7/8/2011    | Pressure Tank              | Valley               |                                                      |                                  |                   |                 |                |               |              |                |                |                |                 |                 |                              |
| 674           | 7/8/2011    | Kitchen Faucet             | Upland               |                                                      |                                  |                   |                 |                |               |              |                |                |                |                 |                 |                              |
| 675           | 7/8/2011    | Kitchen Faucet             | Upland               |                                                      |                                  |                   |                 |                |               |              |                |                |                |                 |                 | 76                           |
| 676           | 7/8/2011    | Kitchen Sink               | Upland               |                                                      |                                  |                   |                 |                |               |              |                |                |                |                 |                 | 154                          |
| 677           | 7/8/2011    | Kitchen Sink               | Upland               |                                                      |                                  |                   |                 |                |               |              |                |                |                |                 |                 | 220                          |
| 678           | 7/8/2011    | Kitchen Sink               | Valley               |                                                      |                                  |                   |                 |                |               |              |                |                |                |                 |                 | 229                          |
| 679           | 7/8/2011    | Spigot In Cooling Barn     | Upland               |                                                      |                                  |                   |                 |                |               |              |                |                |                |                 |                 | 211                          |
| 680           | 7/8/2011    | Kitchen Sink               | Upland               |                                                      |                                  |                   |                 |                |               |              |                |                |                |                 |                 | 293                          |
| 681           | 7/8/2011    | Shop Sink                  | Upland               |                                                      |                                  |                   |                 |                |               |              |                |                |                |                 |                 | 103                          |
| 682           | 7/8/2011    | Kitchen Sink               | Upland               |                                                      |                                  |                   |                 |                |               |              |                |                |                |                 |                 | 161                          |
| 683           | 7/9/2011    | Kitchen Sink               | Upland               |                                                      |                                  |                   |                 |                |               |              |                |                |                |                 |                 |                              |
| 684           | 7/11/2011   | Spigot On Front Of House   | Valley               |                                                      |                                  |                   |                 |                |               |              |                |                |                |                 |                 | 364                          |
| 685           | 7/11/2011   | Spigot Near Water Fountain | Valley               |                                                      |                                  |                   |                 |                |               |              |                |                |                |                 |                 | 265                          |
| 686           | 7/11/2011   | Outside Spigot             | Upland               |                                                      |                                  |                   |                 |                |               |              |                |                |                |                 |                 |                              |
| 687           | 7/11/2011   | Kitchen Sink               | Valley               |                                                      |                                  |                   |                 |                |               |              |                |                |                |                 |                 |                              |
| 688           | 7/11/2011   | Kitchen Sink               | Valley               |                                                      |                                  |                   |                 |                |               |              |                |                |                |                 |                 |                              |
| 689           | 7/11/2011   | Kitchen Sink               | Valley               |                                                      |                                  |                   |                 |                |               |              |                |                |                |                 |                 | 162                          |

Table S.8. Groundwater Quality Data for 1701 "Pre-Drill" Water Well Samples from Susquehanna County, Pennsylvania

| Water Well ID | Sample Date | Sampling Port            | Topographic Location | Gas Extraction Area (Within 1 km of Active Gas Well) | Groundwater Type (If Determined) | Alkalinity (mg/L) | Aluminum (mg/L) | Arsenic (mg/L) | Barium (mg/L) | Boron (mg/L) | Bromide (mg/L) | Cadmium (mg/L) | Calcium (mg/L) | Chloride (mg/L) | Chromium (mg/L) | Conductivity - Field (µs/cm) |
|---------------|-------------|--------------------------|----------------------|------------------------------------------------------|----------------------------------|-------------------|-----------------|----------------|---------------|--------------|----------------|----------------|----------------|-----------------|-----------------|------------------------------|
| 690           | 11/5/2009   | Pressure Tank            | Upland               | Yes                                                  |                                  |                   | < .1            |                | 0.084         |              |                |                |                | 11              |                 |                              |
| 691           | 7/11/2011   | Kitchen Sink             | Upland               |                                                      |                                  |                   |                 |                |               |              |                |                |                |                 |                 | 224                          |
| 692           | 7/11/2011   | Kitchen Sink             | Upland               |                                                      |                                  |                   |                 |                |               |              |                |                |                |                 |                 | 149                          |
| 693           | 7/11/2011   | Kitchen Sink             | Upland               |                                                      |                                  |                   |                 |                |               |              |                |                |                |                 |                 | 162                          |
| 694           | 7/11/2011   | Hand Dug Well            | Upland               |                                                      |                                  |                   |                 |                |               |              |                |                |                |                 |                 | 151                          |
| 695           | 7/11/2011   | Kitchen Sink             | Valley               |                                                      |                                  |                   |                 |                |               |              |                |                |                |                 |                 | 637                          |
| 696           | 7/12/2011   | Bathroom Sink Downstairs | Valley               |                                                      |                                  |                   |                 |                |               |              |                |                |                |                 |                 |                              |
| 697           | 7/12/2011   | Kitchen Sink             | Upland               |                                                      |                                  |                   |                 |                |               |              |                |                |                |                 |                 |                              |
| 698           | 7/12/2011   | Kitchen Faucet           | Valley               |                                                      |                                  |                   |                 |                |               |              |                |                |                |                 |                 | 195                          |
| 699           | 7/12/2011   | Kitchen Sink             | Valley               |                                                      |                                  |                   |                 |                |               |              |                |                |                |                 |                 | 185                          |
| 700           | 7/12/2011   | Kitchen Sink             | Valley               |                                                      |                                  |                   |                 |                |               |              |                |                |                |                 |                 | 415                          |
| 701           | 7/12/2011   | Pressure Tank            | Upland               |                                                      |                                  |                   |                 |                |               |              |                |                |                |                 |                 | 250                          |
| 702           | 7/12/2011   | Kitchen Sink             | Upland               |                                                      |                                  |                   |                 |                |               |              |                |                |                |                 |                 |                              |
| 703           | 7/12/2011   | Spigot Before Filter     | Valley               |                                                      |                                  |                   |                 |                |               |              |                |                |                |                 |                 |                              |
| 704           | 7/12/2011   | Kitchen Sink             | Valley               |                                                      |                                  |                   |                 |                |               |              |                |                |                |                 |                 |                              |
| 705           | 7/12/2011   |                          | Valley               |                                                      |                                  |                   |                 |                |               |              |                |                |                |                 |                 |                              |
| 706           | 7/12/2011   | Pressure Tank            | Upland               |                                                      |                                  |                   |                 |                |               |              |                |                |                |                 |                 | 153                          |
| 707           | 7/12/2011   | Inside Faucet            | Upland               |                                                      |                                  |                   |                 |                |               |              |                |                |                |                 |                 | 217                          |
| 708           | 7/12/2011   | Kitchen Sink             | Upland               |                                                      |                                  |                   |                 |                |               |              |                |                |                |                 |                 | 191                          |
| 709           | 7/12/2011   | Spigot                   | Upland               |                                                      |                                  |                   |                 |                |               |              |                |                |                |                 |                 | 240                          |
| 710           | 7/12/2011   | Spigot                   | Upland               |                                                      |                                  |                   |                 |                |               |              |                |                |                |                 |                 | 257                          |
| 711           | 7/12/2011   | Kitchen Sink             | Valley               |                                                      |                                  |                   |                 |                |               |              |                |                |                |                 |                 | 153                          |
| 712           | 7/12/2011   | Kitchen Faucet           | Upland               |                                                      |                                  |                   |                 |                |               |              |                |                |                |                 |                 | 163                          |
| 713           | 7/12/2011   | Kitchen Faucet           | Valley               |                                                      |                                  |                   |                 |                |               |              |                |                |                |                 |                 | 118                          |
| 714           | 7/13/2011   | Kitchen Sink             | Valley               |                                                      |                                  |                   |                 |                |               |              |                |                |                |                 |                 | 247                          |
| 715           | 7/13/2011   | Kitchen Sink             | Valley               |                                                      |                                  |                   |                 |                |               |              |                |                |                |                 |                 | 172                          |



Table S.8. Groundwater Quality Data for 1701 "Pre-Drill" Water Well Samples from Susquehanna County, Pennsylvania

| Water Well ID | Sample Date | Sampling Port                  | Topographic Location | Gas Extraction Area (Within 1 km of Active Gas Well) | Groundwater Type (If Determined) | Alkalinity (mg/L) | Aluminum (mg/L) | Arsenic (mg/L) | Barium (mg/L) | Boron (mg/L) | Bromide (mg/L) | Cadmium (mg/L) | Calcium (mg/L) | Chloride (mg/L) | Chromium (mg/L) | Conductivity - Field (µs/cm) |
|---------------|-------------|--------------------------------|----------------------|------------------------------------------------------|----------------------------------|-------------------|-----------------|----------------|---------------|--------------|----------------|----------------|----------------|-----------------|-----------------|------------------------------|
| 716           | 7/13/2011   | Kitchen Sink                   | Upland               |                                                      |                                  |                   |                 |                |               |              |                |                |                |                 |                 | 202                          |
| 717           | 7/13/2011   | Spigot                         | Valley               |                                                      |                                  |                   |                 |                |               |              |                |                |                |                 |                 | 191                          |
| 718           | 7/13/2011   | Spigot On Well                 | Valley               |                                                      |                                  |                   |                 |                |               |              |                |                |                |                 |                 | 442                          |
| 719           | 7/13/2011   | Barn Spigot                    | Valley               |                                                      |                                  |                   |                 |                |               |              |                |                |                |                 |                 | 221                          |
| 720           | 7/13/2011   | Kitchen Sink                   | Valley               |                                                      |                                  |                   |                 |                |               |              |                |                |                |                 |                 | 247                          |
| 721           | 7/13/2011   | Garage Spigot                  | Upland               |                                                      |                                  |                   |                 |                |               |              |                |                |                |                 |                 | 351                          |
| 722           | 7/13/2011   | Kitchen Sink                   | Valley               |                                                      |                                  |                   |                 |                |               |              |                |                |                |                 |                 | 252                          |
| 723           | 7/13/2011   | Kitchen Sink                   | Valley               |                                                      |                                  |                   |                 |                |               |              |                |                |                |                 |                 | 231                          |
| 724           | 7/8/2011    |                                | Upland               |                                                      |                                  |                   |                 |                |               |              |                |                |                |                 |                 |                              |
| 725           | 7/8/2011    | Kitchen Sink                   | Upland               |                                                      |                                  |                   |                 |                |               |              |                |                |                |                 |                 |                              |
| 726           | 4/13/2011   | Milkhouse Faucet Barn Well     | Valley               |                                                      | Sodium-Bicarbonate               | 165               | < .01           | < .001         | 0.33          |              |                | < .0001        | 4              | 32.7            | < .002          | 326                          |
| 727           | 4/13/2011   | Tenant'S Pressure Tank         | Upland               |                                                      | Calcium-Bicarbonate-Chloride     | 30                | 0.023           | < .001         | 0.08          |              |                | < .0001        | 12             | 11.4            | < .002          | 113                          |
| 728           | 4/13/2011   | Outside Spigot On Garage       | Upland               |                                                      | Calcium-Sodium-Bicarbonate       | 130               | 0.54            | 0.0098         | 0.21          |              |                | < .0001        | 27             | 19.7            | < .002          |                              |
| 729           | 4/26/2011   | Pressure Tank                  | Valley               |                                                      | Calcium-Bicarbonate              | 160               | 0.059           | 0.0029         | 0.19          |              |                | 0.0001         | 56             | 12.1            | 0.0042          | 280                          |
| 730           | 6/17/2011   | Spigot On Front Of House       | Upland               |                                                      |                                  |                   |                 |                |               |              |                |                |                |                 |                 | 183                          |
| 731           | 6/17/2011   | Kitchen Sink                   | Valley               |                                                      |                                  |                   |                 |                |               |              |                |                |                |                 |                 | 195                          |
| 732           | 6/17/2011   | Spigot Inside Of Shed On Right | Upland               |                                                      |                                  |                   |                 |                |               |              |                |                |                |                 |                 | 258                          |
| 733           | 6/17/2011   | Kitchen Sink                   | Valley               |                                                      |                                  |                   |                 |                |               |              |                |                |                |                 |                 | 329                          |
| 734           | 6/17/2011   | Pressure Tank                  | Valley               |                                                      |                                  |                   |                 |                |               |              |                |                |                |                 |                 | 280                          |
| 735           | 6/20/2011   | Kitchen Sink                   | Upland               |                                                      |                                  |                   |                 |                |               |              |                |                |                |                 |                 | 235                          |
| 736           | 6/20/2011   | Pressure Tank                  | Valley               |                                                      |                                  |                   |                 |                |               |              |                |                |                |                 |                 | 318                          |
| 737           | 6/20/2011   | Kitchen Sink                   | Upland               |                                                      |                                  |                   |                 |                |               |              |                |                |                |                 |                 | 269                          |
| 738           | 6/20/2011   | Kitchen Sink                   | Valley               |                                                      |                                  |                   |                 |                |               |              |                |                |                |                 |                 | 326                          |
| 739           | 6/20/2011   | Kitchen Sink                   | Valley               |                                                      |                                  |                   |                 |                |               |              |                |                |                |                 |                 | 247                          |

Table S.8. Groundwater Quality Data for 1701 "Pre-Drill" Water Well Samples from Susquehanna County, Pennsylvania

| Water Well ID | Sample Date | Sampling Port                 | Topographic Location | Gas Extraction Area (Within 1 km of Active Gas Well) | Groundwater Type (If Determined) | Alkalinity (mg/L) | Aluminum (mg/L) | Arsenic (mg/L) | Barium (mg/L) | Boron (mg/L) | Bromide (mg/L) | Cadmium (mg/L) | Calcium (mg/L) | Chloride (mg/L) | Chromium (mg/L) | Conductivity - Field (µs/cm) |
|---------------|-------------|-------------------------------|----------------------|------------------------------------------------------|----------------------------------|-------------------|-----------------|----------------|---------------|--------------|----------------|----------------|----------------|-----------------|-----------------|------------------------------|
| 740           | 6/20/2011   | Kitchen Sink                  | Valley               |                                                      |                                  |                   |                 |                |               |              |                |                |                |                 |                 | 314                          |
| 741           | 6/21/2011   | Kitchen Sink                  | Upland               |                                                      |                                  |                   |                 |                |               |              |                |                |                |                 |                 | 179                          |
| 742           | 6/21/2011   | Kitchen Sink                  | Valley               |                                                      |                                  |                   |                 |                |               |              |                |                |                |                 |                 | 232                          |
| 743           | 6/21/2011   | Kitchen Sink                  | Valley               |                                                      |                                  |                   |                 |                |               |              |                |                |                |                 |                 | 223                          |
| 744           | 6/21/2011   | Kitchen Sink                  | Valley               |                                                      |                                  |                   |                 |                |               |              |                |                |                |                 |                 | 203                          |
| 745           | 6/21/2011   |                               | Valley               |                                                      |                                  |                   |                 |                |               |              |                |                |                |                 |                 |                              |
| 746           | 6/21/2011   | Outside Spigot                | Valley               |                                                      |                                  |                   |                 |                |               |              |                |                |                |                 |                 | 206                          |
| 747           | 6/21/2011   | Kitchen Sink                  | Valley               |                                                      |                                  |                   |                 |                |               |              |                |                |                |                 |                 | 226                          |
| 748           | 6/21/2011   | Wellhead Spigot               | Valley               |                                                      |                                  |                   |                 |                |               |              |                |                |                |                 |                 | 195                          |
| 749           | 6/21/2011   | Kitchen Sink                  | Upland               |                                                      |                                  |                   |                 |                |               |              |                |                |                |                 |                 | 186                          |
| 750           | 6/21/2011   |                               | Upland               |                                                      |                                  |                   |                 |                |               |              |                |                |                |                 |                 |                              |
| 751           | 6/29/2011   | Kitchen Sink                  | Upland               |                                                      |                                  |                   |                 |                |               |              |                |                |                |                 |                 | 81                           |
| 752           | 6/29/2011   | Barn Spigot                   | Valley               |                                                      |                                  |                   |                 |                |               |              |                |                |                |                 |                 | 119                          |
| 753           | 7/8/2011    | Well 2 On South Side Of House | Upland               |                                                      |                                  |                   |                 |                |               |              |                |                |                |                 |                 | 45                           |
| 754           | 7/8/2011    | Kitchen Sink                  | Upland               |                                                      |                                  |                   |                 |                |               |              |                |                |                |                 |                 | 211                          |
| 755           | 7/8/2011    | Kitchen Sink                  | Valley               |                                                      |                                  |                   |                 |                |               |              |                |                |                |                 |                 |                              |
| 756           | 7/9/2011    | Kitchen Sink                  | Valley               |                                                      |                                  |                   |                 |                |               |              |                |                |                |                 |                 |                              |
| 757           | 7/9/2011    | Spring                        | Upland               |                                                      |                                  |                   |                 |                |               |              |                |                |                |                 |                 |                              |
| 758           | 7/11/2011   | Kitchen Sink                  | Valley               |                                                      |                                  |                   |                 |                |               |              |                |                |                |                 |                 |                              |
| 759           | 7/11/2011   | Kitchen Sink                  | Valley               |                                                      |                                  |                   |                 |                |               |              |                |                |                |                 |                 | 44                           |
| 760           | 7/11/2011   | Kitchen Sink                  | Valley               |                                                      |                                  |                   |                 |                |               |              |                |                |                |                 |                 | 101                          |
| 761           | 11/5/2009   | Outside Faucet                | Valley               | Yes                                                  |                                  |                   | < .1            |                | 0.305         |              |                |                |                | 5.75            |                 |                              |
| 762           | 7/12/2011   | Kitchen Sink                  | Valley               |                                                      |                                  |                   |                 |                |               |              |                |                |                |                 |                 | 144                          |
| 763           | 7/12/2011   | Kitchen Sink                  | Valley               |                                                      |                                  |                   |                 |                |               |              |                |                |                |                 |                 | 194                          |
| 764           | 7/14/2011   | Kitchen Sink                  | Upland               |                                                      |                                  |                   |                 |                |               |              |                |                |                |                 |                 | 195                          |
| 765           | 7/14/2011   | Kitchen Sink                  | Upland               |                                                      |                                  |                   |                 |                |               |              |                |                |                |                 |                 | 219                          |
| 766           | 7/14/2011   | Kitchen Sink                  | Valley               |                                                      |                                  |                   |                 |                |               |              |                |                |                |                 |                 | 1344                         |

Table S.8. Groundwater Quality Data for 1701 "Pre-Drill" Water Well Samples from Susquehanna County, Pennsylvania

| Water Well ID | Sample Date | Sampling Port           | Topographic Location | Gas Extraction Area (Within 1 km of Active Gas Well) | Groundwater Type (If Determined) | Alkalinity (mg/L) | Aluminum (mg/L) | Arsenic (mg/L) | Barium (mg/L) | Boron (mg/L) | Bromide (mg/L) | Cadmium (mg/L) | Calcium (mg/L) | Chloride (mg/L) | Chromium (mg/L) | Conductivity - Field (µs/cm) |
|---------------|-------------|-------------------------|----------------------|------------------------------------------------------|----------------------------------|-------------------|-----------------|----------------|---------------|--------------|----------------|----------------|----------------|-----------------|-----------------|------------------------------|
| 767           | 7/14/2011   | Spigot On Side Of House | Valley               |                                                      |                                  |                   |                 |                |               |              |                |                |                |                 |                 | 461                          |
| 768           | 7/14/2011   | Kitchen Sink            | Valley               |                                                      |                                  |                   |                 |                |               |              |                |                |                |                 |                 | 943                          |
| 769           | 7/14/2011   | Kitchen Sink            | Valley               |                                                      |                                  |                   |                 |                |               |              |                |                |                |                 |                 | 497                          |
| 770           | 7/14/2011   | Kitchen Sink            | Valley               |                                                      |                                  |                   |                 |                |               |              |                |                |                |                 |                 | 285                          |
| 771           | 7/14/2011   | Kitchen Sink            | Upland               |                                                      |                                  |                   |                 |                |               |              |                |                |                |                 |                 | 254                          |
| 772           | 7/14/2011   | Kitchen Sink            | Valley               |                                                      |                                  |                   |                 |                |               |              |                |                |                |                 |                 | 434                          |
| 773           | 7/14/2011   | Spigot                  | Valley               |                                                      |                                  |                   |                 |                |               |              |                |                |                |                 |                 | 1291                         |
| 774           | 7/15/2011   | Kitchen Sink            | Valley               |                                                      |                                  |                   |                 |                |               |              |                |                |                |                 |                 | 191                          |
| 775           | 7/15/2011   | Kitchen Sink            | Valley               |                                                      |                                  |                   |                 |                |               |              |                |                |                |                 |                 | 259                          |
| 776           | 7/15/2011   | Kitchen Sink            | Upland               |                                                      |                                  |                   |                 |                |               |              |                |                |                |                 |                 | 190.1                        |
| 777           | 7/15/2011   | Kitchen Sink            | Upland               |                                                      |                                  |                   |                 |                |               |              |                |                |                |                 |                 | 212                          |
| 778           | 7/15/2011   | Outside Faucet          | Valley               |                                                      |                                  |                   |                 |                |               |              |                |                |                |                 |                 | 244                          |
| 779           | 7/15/2011   | Kitchen Sink            | Valley               |                                                      |                                  |                   |                 |                |               |              |                |                |                |                 |                 | 177                          |
| 780           | 7/15/2011   | Spigot East Of House    | Valley               |                                                      |                                  |                   |                 |                |               |              |                |                |                |                 |                 | 173                          |
| 781           | 7/15/2011   | Outside Faucet          | Upland               |                                                      |                                  |                   |                 |                |               |              |                |                |                |                 |                 | 131                          |
| 782           | 7/15/2011   | Outside Faucet          | Upland               |                                                      |                                  |                   |                 |                |               |              |                |                |                |                 |                 | 211                          |
| 783           | 7/15/2011   | Kitchen Sink            | Upland               |                                                      |                                  |                   |                 |                |               |              |                |                |                |                 |                 | 155                          |
| 784           | 7/15/2011   | Kitchen Sink            | Valley               |                                                      |                                  |                   |                 |                |               |              |                |                |                |                 |                 | 376                          |
| 785           | 7/15/2011   | Kitchen Sink            | Valley               |                                                      |                                  |                   |                 |                |               |              |                |                |                |                 |                 | 211                          |
| 786           | 7/15/2011   | Kitchen Sink            | Valley               |                                                      |                                  |                   |                 |                |               |              |                |                |                |                 |                 | 317                          |
| 787           | 7/15/2011   | Kitchen Sink            | Valley               |                                                      |                                  |                   |                 |                |               |              |                |                |                |                 |                 | 189                          |
| 788           | 7/15/2011   | Kitchen Sink            | Valley               |                                                      |                                  |                   |                 |                |               |              |                |                |                |                 |                 | 303                          |
| 789           | 7/15/2011   | Kitchen Sink            | Valley               |                                                      |                                  |                   |                 |                |               |              |                |                |                |                 |                 | 171.9                        |
| 790           | 7/15/2011   | Kitchen Sink            | Valley               |                                                      |                                  |                   |                 |                |               |              |                |                |                |                 |                 | 278                          |
| 791           | 7/15/2011   | Kitchen Sink            | Upland               |                                                      |                                  |                   |                 |                |               |              |                |                |                |                 |                 | 283                          |

**Table S.8. Groundwater Quality Data for 1701 "Pre-Drill" Water Well Samples from Susquehanna County, Pennsylvania**

| Water Well ID | Sample Date | Sampling Port                    | Topographic Location | Gas Extraction Area (Within 1 km of Active Gas Well) | Groundwater Type (If Determined) | Alkalinity (mg/L) | Aluminum (mg/L) | Arsenic (mg/L) | Barium (mg/L) | Boron (mg/L) | Bromide (mg/L) | Cadmium (mg/L) | Calcium (mg/L) | Chloride (mg/L) | Chromium (mg/L) | Conductivity - Field (µs/cm) |
|---------------|-------------|----------------------------------|----------------------|------------------------------------------------------|----------------------------------|-------------------|-----------------|----------------|---------------|--------------|----------------|----------------|----------------|-----------------|-----------------|------------------------------|
| 792           | 7/15/2011   | Spigot On Rear Of House          | Valley               |                                                      |                                  |                   |                 |                |               |              |                |                |                |                 |                 | 147                          |
| 793           | 7/15/2011   | Kitchen Sink                     | Valley               |                                                      |                                  |                   |                 |                |               |              |                |                |                |                 |                 | 102.3                        |
| 794           | 7/15/2011   | Kitchen Sink                     | Valley               |                                                      |                                  |                   |                 |                |               |              |                |                |                |                 |                 | 142                          |
| 795           | 7/16/2011   | Kitchen Faucet                   | Upland               |                                                      |                                  |                   |                 |                |               |              |                |                |                |                 |                 | 153                          |
| 796           | 7/16/2011   | Kitchen Faucet                   | Valley               |                                                      |                                  |                   |                 |                |               |              |                |                |                |                 |                 | 141                          |
| 797           | 7/16/2011   | Kitchen Faucet                   | Upland               |                                                      |                                  |                   |                 |                |               |              |                |                |                |                 |                 | 75                           |
| 798           | 7/16/2011   | Kitchen Faucet                   | Upland               |                                                      |                                  |                   |                 |                |               |              |                |                |                |                 |                 | 141                          |
| 799           | 7/16/2011   | Kitchen Sink                     | Upland               |                                                      |                                  |                   |                 |                |               |              |                |                |                |                 |                 | 154                          |
| 800           | 7/17/2011   | Outside Spigot In Back Of House  | Valley               |                                                      |                                  |                   |                 |                |               |              |                |                |                |                 |                 | 143                          |
| 801           | 7/17/2011   | Outside Spigot On Front Of House | Valley               |                                                      |                                  |                   |                 |                |               |              |                |                |                |                 |                 | 141                          |
| 802           | 7/17/2011   | Well                             | Upland               |                                                      |                                  |                   |                 |                |               |              |                |                |                |                 |                 | 64                           |
| 803           | 7/17/2011   | Blue Well 40Ft From Road         | Upland               |                                                      |                                  |                   |                 |                |               |              |                |                |                |                 |                 | 140                          |
| 804           | 7/17/2011   | Kitchen Faucet                   | Upland               |                                                      |                                  |                   |                 |                |               |              |                |                |                |                 |                 | 108                          |
| 805           | 7/17/2011   | Spigot From Garage               | Valley               |                                                      |                                  |                   |                 |                |               |              |                |                |                |                 |                 | 102                          |
| 806           | 7/18/2011   | Outside Spigot                   | Upland               |                                                      |                                  |                   |                 |                |               |              |                |                |                |                 |                 | 142                          |
| 807           | 7/18/2011   | Kitchen Sink                     | Upland               |                                                      |                                  |                   |                 |                |               |              |                |                |                |                 |                 | 88                           |
| 808           | 7/18/2011   | Outside Spigot                   | Upland               |                                                      |                                  |                   |                 |                |               |              |                |                |                |                 |                 | 150                          |
| 809           | 7/18/2011   | Kitchen Sink                     | Valley               |                                                      |                                  |                   |                 |                |               |              |                |                |                |                 |                 | 548                          |
| 810           | 7/18/2011   | Kitchen Sink                     | Upland               |                                                      |                                  |                   |                 |                |               |              |                |                |                |                 |                 | 118                          |
| 811           | 7/18/2011   | Kitchen Sink                     | Valley               |                                                      |                                  |                   |                 |                |               |              |                |                |                |                 |                 | 154                          |
| 812           | 7/18/2011   | Kitchen Sink                     | Valley               |                                                      |                                  |                   |                 |                |               |              |                |                |                |                 |                 | 127                          |
| 813           | 7/19/2011   |                                  | Upland               |                                                      |                                  |                   |                 |                |               |              |                |                |                |                 |                 |                              |
| 814           | 7/19/2011   | Garage Sink                      | Valley               |                                                      |                                  |                   |                 |                |               |              |                |                |                |                 |                 | 291                          |
| 815           | 7/19/2011   | Kitchen Sink                     | Valley               |                                                      |                                  |                   |                 |                |               |              |                |                |                |                 |                 | 203                          |

Table S.8. Groundwater Quality Data for 1701 "Pre-Drill" Water Well Samples from Susquehanna County, Pennsylvania

| Water Well ID | Sample Date | Sampling Port            | Topographic Location | Gas Extraction Area (Within 1 km of Active Gas Well) | Groundwater Type (If Determined) | Alkalinity (mg/L) | Aluminum (mg/L) | Arsenic (mg/L) | Barium (mg/L) | Boron (mg/L) | Bromide (mg/L) | Cadmium (mg/L) | Calcium (mg/L) | Chloride (mg/L) | Chromium (mg/L) | Conductivity - Field (µs/cm) |
|---------------|-------------|--------------------------|----------------------|------------------------------------------------------|----------------------------------|-------------------|-----------------|----------------|---------------|--------------|----------------|----------------|----------------|-----------------|-----------------|------------------------------|
| 816           | 7/19/2011   | Barn 2 Pressure Tank     | Valley               |                                                      |                                  |                   |                 |                |               |              |                |                |                |                 |                 | 331                          |
| 817           | 7/19/2011   | Spigot On Side Of Barn   | Upland               |                                                      |                                  |                   |                 |                |               |              |                |                |                |                 |                 | 298                          |
| 818           | 7/19/2011   | Well Head                | Valley               |                                                      |                                  |                   |                 |                |               |              |                |                |                |                 |                 | 180.7                        |
| 819           | 11/23/2009  |                          | Upland               | Yes                                                  |                                  |                   | < .1            |                | 0.064         |              |                |                |                | 10.3            |                 |                              |
| 820           | 7/19/2011   | Kitchen Sink             | Valley               |                                                      |                                  |                   |                 |                |               |              |                |                |                |                 |                 | 98                           |
| 821           | 7/19/2011   | Kitchen Sink             | Valley               |                                                      |                                  |                   |                 |                |               |              |                |                |                |                 |                 | 119.7                        |
| 822           | 7/19/2011   | Kitchen Sink             | Valley               |                                                      |                                  |                   |                 |                |               |              |                |                |                |                 |                 | 284                          |
| 823           | 7/19/2011   | Kitchen Sink             | Valley               |                                                      |                                  |                   |                 |                |               |              |                |                |                |                 |                 | 178.6                        |
| 824           | 7/20/2011   | Outside Faucet           | Upland               |                                                      |                                  |                   |                 |                |               |              |                |                |                |                 |                 | 281                          |
| 825           | 7/20/2011   | Inside Spigot            | Upland               |                                                      |                                  |                   |                 |                |               |              |                |                |                |                 |                 | 375                          |
| 826           | 7/20/2011   | Kitchen Sink             | Upland               |                                                      |                                  |                   |                 |                |               |              |                |                |                |                 |                 | 172                          |
| 827           | 7/20/2011   | Kitchen Sink             | Valley               |                                                      |                                  |                   |                 |                |               |              |                |                |                |                 |                 | 211                          |
| 828           | 7/20/2011   | Kitchen Sink             | Upland               |                                                      |                                  |                   |                 |                |               |              |                |                |                |                 |                 | 150                          |
| 829           | 7/20/2011   | Kitchen Sink             | Valley               |                                                      |                                  |                   |                 |                |               |              |                |                |                |                 |                 | 146                          |
| 830           | 7/20/2011   | Outside Spigot           | Upland               |                                                      |                                  |                   |                 |                |               |              |                |                |                |                 |                 | 159                          |
| 831           | 7/20/2011   | Kitchen Sink             | Valley               |                                                      |                                  |                   |                 |                |               |              |                |                |                |                 |                 | 113                          |
| 832           | 7/20/2011   | Kitchen Sink             | Valley               |                                                      |                                  |                   |                 |                |               |              |                |                |                |                 |                 | 214                          |
| 833           | 7/20/2011   | Outside Faucet           | Valley               |                                                      |                                  |                   |                 |                |               |              |                |                |                |                 |                 | 285                          |
| 834           | 7/20/2011   | Kitchen Sink             | Upland               |                                                      |                                  |                   |                 |                |               |              |                |                |                |                 |                 | 130                          |
| 835           | 7/20/2011   | Kitchen Sink             | Upland               |                                                      |                                  |                   |                 |                |               |              |                |                |                |                 |                 | 234                          |
| 836           | 7/21/2011   | Outside Faucet           | Upland               |                                                      |                                  |                   |                 |                |               |              |                |                |                |                 |                 | 267                          |
| 837           | 7/21/2011   | Spigot In Front Of House | Upland               |                                                      |                                  |                   |                 |                |               |              |                |                |                |                 |                 | 156                          |
| 838           | 7/21/2011   | Kitchen Sink             | Valley               |                                                      |                                  |                   |                 |                |               |              |                |                |                |                 |                 | 320                          |
| 839           | 7/21/2011   | Kitchen Sink             | Upland               |                                                      |                                  |                   |                 |                |               |              |                |                |                |                 |                 | 292                          |
| 840           | 7/21/2011   | Kitchen Sink             | Upland               |                                                      |                                  |                   |                 |                |               |              |                |                |                |                 |                 | 140                          |

Table S.8. Groundwater Quality Data for 1701 "Pre-Drill" Water Well Samples from Susquehanna County, Pennsylvania

| Water Well ID | Sample Date | Sampling Port             | Topographic Location | Gas Extraction Area (Within 1 km of Active Gas Well) | Groundwater Type (If Determined) | Alkalinity (mg/L) | Aluminum (mg/L) | Arsenic (mg/L) | Barium (mg/L) | Boron (mg/L) | Bromide (mg/L) | Cadmium (mg/L) | Calcium (mg/L) | Chloride (mg/L) | Chromium (mg/L) | Conductivity - Field (µs/cm) |
|---------------|-------------|---------------------------|----------------------|------------------------------------------------------|----------------------------------|-------------------|-----------------|----------------|---------------|--------------|----------------|----------------|----------------|-----------------|-----------------|------------------------------|
| 841           | 7/21/2011   | Kitchen Sink              | Valley               |                                                      |                                  |                   |                 |                |               |              |                |                |                |                 |                 | 299                          |
| 842           | 7/21/2011   | Kitchen Sink              | Valley               |                                                      |                                  |                   |                 |                |               |              |                |                |                |                 |                 | 146                          |
| 843           | 7/21/2011   | Kitchen Sink              | Upland               |                                                      |                                  |                   |                 |                |               |              |                |                |                |                 |                 | 77                           |
| 844           | 7/21/2011   | Pressure Tank             | Upland               |                                                      |                                  |                   |                 |                |               |              |                |                |                |                 |                 | 41.7                         |
| 845           | 7/21/2011   | Basement Sink             | Upland               |                                                      |                                  |                   |                 |                |               |              |                |                |                |                 |                 | 170                          |
| 846           | 7/21/2011   | Kitchen Sink              | Upland               |                                                      |                                  |                   |                 |                |               |              |                |                |                |                 |                 | 250                          |
| 847           | 7/21/2011   | Spigot In Rear Of House   | Upland               |                                                      |                                  |                   |                 |                |               |              |                |                |                |                 |                 |                              |
| 848           | 7/21/2011   | Kitchen Sink              | Valley               |                                                      |                                  |                   |                 |                |               |              |                |                |                |                 |                 | 494                          |
| 849           | 7/21/2011   | Kitchen Sink              | Valley               |                                                      |                                  |                   |                 |                |               |              |                |                |                |                 |                 | 306                          |
| 850           | 7/22/2011   | Kitchen Sink              | Valley               |                                                      |                                  |                   |                 |                |               |              |                |                |                |                 |                 | 147.6                        |
| 851           | 7/22/2011   | Outside Spigot            | Valley               |                                                      |                                  |                   |                 |                |               |              |                |                |                |                 |                 | 349                          |
| 852           | 7/22/2011   | Kitchen Sink              | Valley               |                                                      |                                  |                   |                 |                |               |              |                |                |                |                 |                 | 264                          |
| 853           | 7/22/2011   | Kitchen Sink              | Valley               |                                                      |                                  |                   |                 |                |               |              |                |                |                |                 |                 | 236                          |
| 854           | 7/22/2011   | Kitchen Sink              | Valley               |                                                      |                                  |                   |                 |                |               |              |                |                |                |                 |                 | 383                          |
| 855           | 7/22/2011   | Pipe Overflow             | Valley               |                                                      |                                  |                   |                 |                |               |              |                |                |                |                 |                 | 288                          |
| 856           | 7/22/2011   | Kitchen Sink              | Valley               |                                                      |                                  |                   |                 |                |               |              |                |                |                |                 |                 | 201                          |
| 857           | 7/22/2011   | Pressure Tank In Garage   | Valley               |                                                      |                                  |                   |                 |                |               |              |                |                |                |                 |                 | 481                          |
| 858           | 11/5/2009   | Basement At Pressure Tank | Valley               | Yes                                                  |                                  |                   | < .1            |                | 0.169         |              |                |                |                | 4.53            |                 |                              |
| 859           | 7/22/2011   | Outside Spigot            | Valley               |                                                      |                                  |                   |                 |                |               |              |                |                |                |                 |                 | 139                          |
| 860           | 7/22/2011   | Kitchen Faucet            | Valley               |                                                      |                                  |                   |                 |                |               |              |                |                |                |                 |                 | 157                          |
| 861           | 7/22/2011   | Spigot Under Porch        | Valley               |                                                      |                                  |                   |                 |                |               |              |                |                |                |                 |                 | 163                          |
| 862           | 7/22/2011   | Kitchen Sink              | Valley               |                                                      |                                  |                   |                 |                |               |              |                |                |                |                 |                 | 736                          |
| 863           | 7/22/2011   | Pressure Tank In Garage   | Valley               |                                                      |                                  |                   |                 |                |               |              |                |                |                |                 |                 | 668                          |

Table S.8. Groundwater Quality Data for 1701 "Pre-Drill" Water Well Samples from Susquehanna County, Pennsylvania

| Water Well ID | Sample Date | Sampling Port       | Topographic Location | Gas Extraction Area (Within 1 km of Active Gas Well) | Groundwater Type (If Determined) | Alkalinity (mg/L) | Aluminum (mg/L) | Arsenic (mg/L) | Barium (mg/L) | Boron (mg/L) | Bromide (mg/L) | Cadmium (mg/L) | Calcium (mg/L) | Chloride (mg/L) | Chromium (mg/L) | Conductivity - Field (µs/cm) |
|---------------|-------------|---------------------|----------------------|------------------------------------------------------|----------------------------------|-------------------|-----------------|----------------|---------------|--------------|----------------|----------------|----------------|-----------------|-----------------|------------------------------|
| 864           | 7/22/2011   | Kitchen Sink        | Upland               |                                                      |                                  |                   |                 |                |               |              |                |                |                |                 |                 | 130.7                        |
| 865           | 7/22/2011   | Kitchen Sink        | Upland               |                                                      |                                  |                   |                 |                |               |              |                |                |                |                 |                 | 142.1                        |
| 866           | 7/22/2011   | Kitchen Sink        | Upland               |                                                      |                                  |                   |                 |                |               |              |                |                |                |                 |                 | 137.9                        |
| 867           | 11/5/2009   | Kitchen Sink        | Upland               | Yes                                                  |                                  |                   | < .1            |                | < .025        |              |                |                |                | 12.3            |                 |                              |
| 868           | 7/22/2011   | Kitchen Sink        | Valley               |                                                      |                                  |                   |                 |                |               |              |                |                |                |                 |                 | 1310                         |
| 869           | 7/22/2011   | Pressure Tank       | Valley               |                                                      |                                  |                   |                 |                |               |              |                |                |                |                 |                 | 598                          |
| 870           | 7/25/2011   | Kitchen Sink        | Valley               |                                                      |                                  |                   |                 |                |               |              |                |                |                |                 |                 | 146                          |
| 871           | 7/25/2011   | Kitchen Sink        | Valley               |                                                      |                                  |                   |                 |                |               |              |                |                |                |                 |                 | 170                          |
| 872           | 7/25/2011   | Kitchen Sink        | Upland               |                                                      |                                  |                   |                 |                |               |              |                |                |                |                 |                 | 153                          |
| 873           | 7/25/2011   | Kitchen Sink        | Upland               |                                                      |                                  |                   |                 |                |               |              |                |                |                |                 |                 | 171                          |
| 874           | 7/25/2011   | Kitchen Sink        | Upland               |                                                      |                                  |                   |                 |                |               |              |                |                |                |                 |                 | 328                          |
| 875           | 7/25/2011   | Kitchen Sink        | Upland               |                                                      |                                  |                   |                 |                |               |              |                |                |                |                 |                 | 152                          |
| 876           | 7/25/2011   | Warehouse At Quarry | Upland               |                                                      |                                  |                   |                 |                |               |              |                |                |                |                 |                 | 135                          |
| 877           | 7/25/2011   | Kitchen Sink        | Valley               |                                                      |                                  |                   |                 |                |               |              |                |                |                |                 |                 | 284                          |
| 878           | 7/25/2011   | Kitchen Sink        | Upland               |                                                      |                                  |                   |                 |                |               |              |                |                |                |                 |                 | 234                          |
| 879           | 7/25/2011   | Kitchen Sink        | Valley               |                                                      |                                  |                   |                 |                |               |              |                |                |                |                 |                 | 730                          |
| 880           | 1/3/2010    | Pressure Tank       | Upland               | Yes                                                  |                                  |                   | < .1            |                | 0.117         |              |                |                |                | 23.3            |                 |                              |
| 881           | 7/25/2011   | Kitchen Sink        | Valley               |                                                      |                                  |                   |                 |                |               |              |                |                |                |                 |                 | 357                          |
| 882           | 7/25/2011   | Pressure Tank       | Valley               |                                                      |                                  |                   |                 |                |               |              |                |                |                |                 |                 | 756                          |
| 883           | 7/26/2011   | Kitchen Sink        | Valley               |                                                      |                                  |                   |                 |                |               |              |                |                |                |                 |                 | 275                          |
| 884           | 7/26/2011   | Kitchen Sink        | Valley               |                                                      |                                  |                   |                 |                |               |              |                |                |                |                 |                 | 137                          |
| 885           | 7/26/2011   | Kitchen Sink        | Valley               |                                                      |                                  |                   |                 |                |               |              |                |                |                |                 |                 | 155                          |
| 886           | 7/26/2011   | Kitchen Sink        | Valley               |                                                      |                                  |                   |                 |                |               |              |                |                |                |                 |                 | 166                          |
| 887           | 7/26/2011   | Kitchen Sink        | Valley               |                                                      |                                  |                   |                 |                |               |              |                |                |                |                 |                 | 142                          |
| 888           | 12/22/2009  | Pressure Tank       | Upland               | Yes                                                  |                                  |                   | < .1            |                | 0.053         |              |                |                |                | 4.33            |                 | 128.6                        |

Table S.8. Groundwater Quality Data for 1701 "Pre-Drill" Water Well Samples from Susquehanna County, Pennsylvania

| Water Well ID | Sample Date | Sampling Port   | Topographic Location | Gas Extraction Area (Within 1 km of Active Gas Well) | Groundwater Type (If Determined) | Alkalinity (mg/L) | Aluminum (mg/L) | Arsenic (mg/L) | Barium (mg/L) | Boron (mg/L) | Bromide (mg/L) | Cadmium (mg/L) | Calcium (mg/L) | Chloride (mg/L) | Chromium (mg/L) | Conductivity - Field (µs/cm) |
|---------------|-------------|-----------------|----------------------|------------------------------------------------------|----------------------------------|-------------------|-----------------|----------------|---------------|--------------|----------------|----------------|----------------|-----------------|-----------------|------------------------------|
| 889           | 7/26/2011   | Kitchen Sink    | Upland               |                                                      |                                  |                   |                 |                |               |              |                |                |                |                 |                 | 153                          |
| 890           | 7/26/2011   | Pipe From Well  | Valley               |                                                      |                                  |                   |                 |                |               |              |                |                |                |                 |                 | 322                          |
| 891           | 7/26/2011   | Outside Spigot  | Upland               |                                                      |                                  |                   |                 |                |               |              |                |                |                |                 |                 | 228                          |
| 892           | 7/26/2011   | Outside Spigot  | Valley               |                                                      |                                  |                   |                 |                |               |              |                |                |                |                 |                 | 220                          |
| 893           | 7/26/2011   | Outside Spigot  | Upland               |                                                      |                                  |                   |                 |                |               |              |                |                |                |                 |                 | 238                          |
| 894           | 7/26/2011   | Kitchen Sink    | Valley               |                                                      |                                  |                   |                 |                |               |              |                |                |                |                 |                 | 184.8                        |
| 895           | 12/15/2009  | Pressure Tank   | Upland               |                                                      |                                  |                   | 0.141           |                | 0.22          |              |                |                |                | 10.2            |                 |                              |
| 896           | 7/26/2011   | Outside Spigot  | Upland               |                                                      |                                  |                   |                 |                |               |              |                |                |                |                 |                 | 166.9                        |
| 897           | 7/26/2011   | Kitchen Sink    | Valley               |                                                      |                                  |                   |                 |                |               |              |                |                |                |                 |                 | 147.8                        |
| 898           | 7/26/2011   | Outside Spigot  | Upland               |                                                      |                                  |                   |                 |                |               |              |                |                |                |                 |                 | 202                          |
| 899           | 7/26/2011   | Kitchen Sink    | Upland               |                                                      |                                  |                   |                 |                |               |              |                |                |                |                 |                 | 50                           |
| 900           | 7/26/2011   | Kitchen Sink    | Upland               |                                                      |                                  |                   |                 |                |               |              |                |                |                |                 |                 | 132.8                        |
| 901           | 7/27/2011   | Kitchen Sink    | Upland               |                                                      |                                  |                   |                 |                |               |              |                |                |                |                 |                 | 91                           |
| 902           | 7/27/2011   | Outside Faucet  | Valley               |                                                      |                                  |                   |                 |                |               |              |                |                |                |                 |                 | 142                          |
| 903           | 7/27/2011   | Basement Spigot | Valley               |                                                      |                                  |                   |                 |                |               |              |                |                |                |                 |                 | 247                          |
| 904           | 12/17/2009  | Pressure Tank   | Valley               | Yes                                                  |                                  |                   | 0.127           |                | 1.31          |              |                |                |                | 5.62            |                 | 224                          |
| 905           | 7/27/2011   | Kitchen Sink    | Valley               |                                                      |                                  |                   |                 |                |               |              |                |                |                |                 |                 | 171                          |
| 906           | 7/27/2011   | Kitchen Sink    | Valley               |                                                      |                                  |                   |                 |                |               |              |                |                |                |                 |                 | 207                          |
| 907           | 7/27/2011   | Kitchen Sink    | Upland               |                                                      |                                  |                   |                 |                |               |              |                |                |                |                 |                 | 158                          |
| 908           | 7/27/2011   | Pipe Overflow   | Valley               |                                                      |                                  |                   |                 |                |               |              |                |                |                |                 |                 | 91                           |
| 909           | 7/27/2011   | Pressure Tank   | Upland               |                                                      |                                  |                   |                 |                |               |              |                |                |                |                 |                 | 93.2                         |
| 910           | 7/27/2011   | Kitchen Sink    | Upland               |                                                      |                                  |                   |                 |                |               |              |                |                |                |                 |                 | 59                           |
| 911           | 7/27/2011   | Kitchen Sink    | Upland               |                                                      |                                  |                   |                 |                |               |              |                |                |                |                 |                 | 62.8                         |
| 912           | 7/27/2011   | Outside Spigot  | Valley               |                                                      |                                  |                   |                 |                |               |              |                |                |                |                 |                 | 182.4                        |
| 913           | 7/27/2011   | Kitchen Sink    | Valley               |                                                      |                                  |                   |                 |                |               |              |                |                |                |                 |                 | 208                          |



Table S.8. Groundwater Quality Data for 1701 "Pre-Drill" Water Well Samples from Susquehanna County, Pennsylvania

| Water Well ID | Sample Date | Sampling Port             | Topographic Location | Gas Extraction Area (Within 1 km of Active Gas Well) | Groundwater Type (If Determined) | Alkalinity (mg/L) | Aluminum (mg/L) | Arsenic (mg/L) | Barium (mg/L) | Boron (mg/L) | Bromide (mg/L) | Cadmium (mg/L) | Calcium (mg/L) | Chloride (mg/L) | Chromium (mg/L) | Conductivity - Field (µs/cm) |
|---------------|-------------|---------------------------|----------------------|------------------------------------------------------|----------------------------------|-------------------|-----------------|----------------|---------------|--------------|----------------|----------------|----------------|-----------------|-----------------|------------------------------|
| 914           | 7/27/2011   | Kitchen Sink              | Upland               |                                                      |                                  |                   |                 |                |               |              |                |                |                |                 |                 | 230                          |
| 915           | 7/27/2011   | Kitchen Sink              | Upland               |                                                      |                                  |                   |                 |                |               |              |                |                |                |                 |                 | 166.8                        |
| 916           | 7/28/2011   | Kitchen Sink              | Upland               |                                                      |                                  |                   |                 |                |               |              |                |                |                |                 |                 | 222                          |
| 917           | 7/28/2011   | Kitchen Sink              | Valley               |                                                      |                                  |                   |                 |                |               |              |                |                |                |                 |                 | 111                          |
| 918           | 7/28/2011   | Kitchen Sink              | Upland               |                                                      |                                  |                   |                 |                |               |              |                |                |                |                 |                 | 83                           |
| 919           | 7/28/2011   | Kitchen Sink              | Upland               |                                                      |                                  |                   |                 |                |               |              |                |                |                |                 |                 | 44                           |
| 920           | 7/28/2011   | Kitchen Sink              | Valley               |                                                      |                                  |                   |                 |                |               |              |                |                |                |                 |                 | 101                          |
| 921           | 7/28/2011   | Outside Spigot            | Valley               | Yes                                                  |                                  |                   |                 |                |               |              |                |                |                |                 |                 | 825                          |
| 922           | 7/29/2011   | Kitchen Sink              | Valley               |                                                      |                                  |                   |                 |                |               |              |                |                |                |                 |                 | 114                          |
| 923           | 12/14/2009  | Basement At Pressure Tank | Valley               | Yes                                                  |                                  |                   | < .1            |                | 0.062         |              |                |                |                | 7.82            |                 |                              |
| 924           | 12/17/2009  | Kitchen Sink              | Valley               |                                                      |                                  |                   | < .1            |                | 0.195         |              |                |                |                | 7.04            |                 | 327                          |
| 925           | 12/13/2009  | Pressure Tank             | Valley               |                                                      |                                  |                   | < .1            |                | 0.041         |              |                |                |                | 11.6            |                 |                              |
| 926           | 7/29/2011   | Kitchen Sink              | Valley               |                                                      |                                  |                   |                 |                |               |              |                |                |                |                 |                 | 147                          |
| 927           | 7/29/2011   | Bathroom Sink             | Valley               |                                                      |                                  |                   |                 |                |               |              |                |                |                |                 |                 | 169                          |
| 928           | 7/29/2011   | Kitchen Sink              | Upland               |                                                      |                                  |                   |                 |                |               |              |                |                |                |                 |                 | 138                          |
| 929           | 7/29/2011   | Spigot On Side Of House   | Upland               |                                                      |                                  |                   |                 |                |               |              |                |                |                |                 |                 | 62                           |
| 930           | 7/29/2011   | Bathroom Sink             | Upland               |                                                      |                                  |                   |                 |                |               |              |                |                |                |                 |                 | 107                          |
| 931           | 12/21/2009  | Pressure Tank             | Valley               | Yes                                                  |                                  |                   | < .1            |                | 1.16          |              |                |                |                | 13.3            |                 | 277                          |
| 932           | 7/29/2011   | Spigot On Side Of House   | Upland               |                                                      |                                  |                   |                 |                |               |              |                |                |                |                 |                 | 134                          |
| 933           | 7/30/2011   | Kitchen Sink              | Valley               |                                                      |                                  |                   |                 |                |               |              |                |                |                |                 |                 | 227                          |
| 934           | 7/30/2011   | Outside Spigot            | Valley               |                                                      |                                  |                   |                 |                |               |              |                |                |                |                 |                 | 243                          |
| 935           | 7/30/2011   | Kitchen Sink              | Upland               |                                                      |                                  |                   |                 |                |               |              |                |                |                |                 |                 | 247                          |
| 936           | 7/30/2011   | Basement Sink             | Upland               |                                                      |                                  |                   |                 |                |               |              |                |                |                |                 |                 | 429                          |
| 937           | 7/30/2011   | Outside Spigot            | Valley               |                                                      |                                  |                   |                 |                |               |              |                |                |                |                 |                 | 222                          |

Table S.8. Groundwater Quality Data for 1701 "Pre-Drill" Water Well Samples from Susquehanna County, Pennsylvania

| Water Well ID | Sample Date | Sampling Port                 | Topographic Location | Gas Extraction Area (Within 1 km of Active Gas Well) | Groundwater Type (If Determined) | Alkalinity (mg/L) | Aluminum (mg/L) | Arsenic (mg/L) | Barium (mg/L) | Boron (mg/L) | Bromide (mg/L) | Cadmium (mg/L) | Calcium (mg/L) | Chloride (mg/L) | Chromium (mg/L) | Conductivity - Field (µs/cm) |
|---------------|-------------|-------------------------------|----------------------|------------------------------------------------------|----------------------------------|-------------------|-----------------|----------------|---------------|--------------|----------------|----------------|----------------|-----------------|-----------------|------------------------------|
| 938           | 7/30/2011   | Pressure Tank                 | Valley               |                                                      |                                  |                   |                 |                |               |              |                |                |                |                 |                 | 1166                         |
| 939           | 7/30/2011   | Kitchen Sink                  | Upland               |                                                      |                                  |                   |                 |                |               |              |                |                |                |                 |                 | 142.3                        |
| 940           | 7/30/2011   | Kitchen Sink                  | Upland               |                                                      |                                  |                   |                 |                |               |              |                |                |                |                 |                 | 130.7                        |
| 941           | 8/1/2011    | Outside Spigot                | Valley               |                                                      |                                  |                   |                 |                |               |              |                |                |                |                 |                 | 143                          |
| 942           | 8/1/2011    | Kitchen Sink                  | Upland               |                                                      |                                  |                   |                 |                |               |              |                |                |                |                 |                 | 147                          |
| 943           | 8/1/2011    | Kitchen Sink                  | Valley               |                                                      |                                  |                   |                 |                |               |              |                |                |                |                 |                 | 286                          |
| 944           | 8/1/2011    | Kitchen Sink                  | Valley               |                                                      |                                  |                   |                 |                |               |              |                |                |                |                 |                 | 211                          |
| 945           | 8/1/2011    | Pressure Tank                 | Upland               | Yes                                                  |                                  |                   |                 |                |               |              |                |                |                |                 |                 | 208                          |
| 946           | 8/1/2011    | Outside Spigot                | Valley               |                                                      |                                  |                   |                 |                |               |              |                |                |                |                 |                 | 264                          |
| 947           | 12/21/2009  | Pressure Tank-Tenants House   | Upland               |                                                      |                                  |                   | < .1            |                | 0.074         |              |                |                |                | 22.1            |                 | 304                          |
| 948           | 8/1/2011    | Kitchen Sink                  | Upland               |                                                      |                                  |                   |                 |                |               |              |                |                |                |                 |                 | 250                          |
| 949           | 8/1/2011    | Spigot On Garage              | Valley               |                                                      |                                  |                   |                 |                |               |              |                |                |                |                 |                 | 335                          |
| 950           | 8/1/2011    | Spigot On South Side Of House | Valley               |                                                      |                                  |                   |                 |                |               |              |                |                |                |                 |                 | 299                          |
| 951           | 8/1/2011    | Shop Sink                     | Upland               |                                                      |                                  |                   |                 |                |               |              |                |                |                |                 |                 | 275                          |
| 952           | 8/1/2011    | Pressure Tank                 | Valley               |                                                      |                                  |                   |                 |                |               |              |                |                |                |                 |                 | 491                          |
| 953           | 8/2/2011    | Kitchen Sink                  | Upland               |                                                      |                                  |                   |                 |                |               |              |                |                |                |                 |                 | 278                          |
| 954           | 8/2/2011    | Kitchen Sink                  | Valley               |                                                      |                                  |                   |                 |                |               |              |                |                |                |                 |                 |                              |
| 955           | 8/2/2011    | Kitchen Sink                  | Valley               |                                                      |                                  |                   |                 |                |               |              |                |                |                |                 |                 |                              |
| 956           | 8/2/2011    | Kitchen Sink                  | Valley               |                                                      |                                  |                   |                 |                |               |              |                |                |                |                 |                 | 275                          |
| 957           | 8/2/2011    | Kitchen Sink                  | Upland               |                                                      |                                  |                   |                 |                |               |              |                |                |                |                 |                 | 241                          |
| 958           | 8/2/2011    | Pressure Tank                 | Valley               |                                                      |                                  |                   |                 |                |               |              |                |                |                |                 |                 | 263                          |
| 959           | 8/2/2011    | Kitchen Sink                  | Upland               |                                                      |                                  |                   |                 |                |               |              |                |                |                |                 |                 | 159                          |
| 960           | 8/2/2011    | Kitchen Sink                  | Upland               |                                                      |                                  |                   |                 |                |               |              |                |                |                |                 |                 | 144                          |

Table S.8. Groundwater Quality Data for 1701 "Pre-Drill" Water Well Samples from Susquehanna County, Pennsylvania

| Water Well ID | Sample Date | Sampling Port                               | Topographic Location | Gas Extraction Area (Within 1 km of Active Gas Well) | Groundwater Type (If Determined) | Alkalinity (mg/L) | Aluminum (mg/L) | Arsenic (mg/L) | Barium (mg/L) | Boron (mg/L) | Bromide (mg/L) | Cadmium (mg/L) | Calcium (mg/L) | Chloride (mg/L) | Chromium (mg/L) | Conductivity - Field (µs/cm) |     |
|---------------|-------------|---------------------------------------------|----------------------|------------------------------------------------------|----------------------------------|-------------------|-----------------|----------------|---------------|--------------|----------------|----------------|----------------|-----------------|-----------------|------------------------------|-----|
| 961           | 8/2/2011    | Spigot Across The Road From Office Building | Valley               |                                                      |                                  |                   |                 |                |               |              |                |                |                |                 |                 |                              |     |
| 962           | 8/2/2011    | Kitchen Sink                                | Upland               |                                                      |                                  |                   |                 |                |               |              |                |                |                |                 |                 |                              | 137 |
| 963           | 8/5/2011    | Kitchen Sink                                | Valley               |                                                      |                                  |                   |                 |                |               |              |                |                |                |                 |                 |                              | 119 |
| 964           | 8/5/2011    | Kitchen Sink                                | Valley               |                                                      |                                  |                   |                 |                |               |              |                |                |                |                 |                 |                              | 396 |
| 965           | 8/5/2011    | Spigot On Side Of House                     | Valley               |                                                      |                                  |                   |                 |                |               |              |                |                |                |                 |                 |                              |     |
| 966           | 8/5/2011    | Spigot In Shed Behind House                 | Upland               |                                                      |                                  |                   |                 |                |               |              |                |                |                |                 |                 |                              | 135 |
| 967           | 8/5/2011    | Pressure Tank                               | Valley               |                                                      |                                  |                   |                 |                |               |              |                |                |                |                 |                 |                              | 354 |
| 968           | 8/5/2011    | Kitchen Sink                                | Upland               | Yes                                                  |                                  |                   |                 |                |               |              |                |                |                |                 |                 |                              | 97  |
| 969           | 8/5/2011    | Outside Spigot                              | Valley               |                                                      |                                  |                   |                 |                |               |              |                |                |                |                 |                 |                              | 507 |
| 970           | 12/15/2009  | Pressure Tank                               | Upland               | Yes                                                  |                                  |                   | 0.138           |                | 0.106         |              |                |                |                | 20.4            |                 |                              |     |
| 971           | 8/5/2011    | Kitchen Sink                                | Upland               |                                                      |                                  |                   |                 |                |               |              |                |                |                |                 |                 |                              | 160 |
| 972           | 8/5/2011    | Kitchen Sink                                | Upland               |                                                      |                                  |                   |                 |                |               |              |                |                |                |                 |                 |                              | 225 |
| 973           | 8/5/2011    | Outside Spigot                              | Valley               |                                                      |                                  |                   |                 |                |               |              |                |                |                |                 |                 |                              | 186 |
| 974           | 8/5/2011    | Outside Spigot                              | Valley               |                                                      |                                  |                   |                 |                |               |              |                |                |                |                 |                 |                              | 564 |
| 975           | 8/5/2011    | Spigot On Side Of House                     | Upland               |                                                      |                                  |                   |                 |                |               |              |                |                |                |                 |                 |                              | 94  |
| 976           | 8/5/2011    | Spigot On Side Of House                     | Upland               |                                                      |                                  |                   |                 |                |               |              |                |                |                |                 |                 |                              | 134 |
| 977           | 8/5/2011    | Kitchen Sink                                | Upland               |                                                      |                                  |                   |                 |                |               |              |                |                |                |                 |                 |                              | 212 |
| 978           | 8/5/2011    | Spigot On Side Of House                     | Upland               |                                                      |                                  |                   |                 |                |               |              |                |                |                |                 |                 |                              | 236 |
| 979           | 8/5/2011    | Well                                        | Upland               |                                                      |                                  |                   |                 |                |               |              |                |                |                |                 |                 |                              | 67  |
| 980           | 8/5/2011    | Pressure Tank                               | Upland               |                                                      |                                  |                   |                 |                |               |              |                |                |                |                 |                 |                              | 329 |
| 981           | 8/5/2011    | Kitchen Sink                                | Upland               |                                                      |                                  |                   |                 |                |               |              |                |                |                |                 |                 |                              | 239 |

Table S.8. Groundwater Quality Data for 1701 "Pre-Drill" Water Well Samples from Susquehanna County, Pennsylvania

| Water Well ID | Sample Date | Sampling Port             | Topographic Location | Gas Extraction Area (Within 1 km of Active Gas Well) | Groundwater Type (If Determined) | Alkalinity (mg/L) | Aluminum (mg/L) | Arsenic (mg/L) | Barium (mg/L) | Boron (mg/L) | Bromide (mg/L) | Cadmium (mg/L) | Calcium (mg/L) | Chloride (mg/L) | Chromium (mg/L) | Conductivity - Field (µs/cm) |
|---------------|-------------|---------------------------|----------------------|------------------------------------------------------|----------------------------------|-------------------|-----------------|----------------|---------------|--------------|----------------|----------------|----------------|-----------------|-----------------|------------------------------|
| 982           | 8/5/2011    | Kitchen Faucet            | Valley               |                                                      |                                  |                   |                 |                |               |              |                |                |                |                 |                 | 321                          |
| 983           | 1/4/2010    | Well                      | Valley               | Yes                                                  |                                  |                   | < .1            |                | 2.15          |              |                |                |                | 61.4            |                 | 389                          |
| 984           | 8/5/2011    | Outside Faucet            | Valley               |                                                      |                                  |                   |                 |                |               |              |                |                |                |                 |                 | 256                          |
| 985           | 8/5/2011    | Kitchen Sink              | Upland               |                                                      |                                  |                   |                 |                |               |              |                |                |                |                 |                 | 268                          |
| 986           | 8/8/2011    | Pressure Tank             | Valley               |                                                      |                                  |                   |                 |                |               |              |                |                |                |                 |                 | 329                          |
| 987           | 8/8/2011    | Kitchen Sink              | Valley               |                                                      |                                  |                   |                 |                |               |              |                |                |                |                 |                 | 319                          |
| 988           | 8/8/2011    | Kitchen Sink              | Valley               |                                                      |                                  |                   |                 |                |               |              |                |                |                |                 |                 | 215                          |
| 989           | 8/8/2011    |                           | Upland               |                                                      |                                  |                   |                 |                |               |              |                |                |                |                 |                 |                              |
| 990           | 8/8/2011    | Kitchen Sink              | Valley               |                                                      |                                  |                   |                 |                |               |              |                |                |                |                 |                 | 17.3                         |
| 991           | 8/8/2011    | Kitchen Sink              | Upland               |                                                      |                                  |                   |                 |                |               |              |                |                |                |                 |                 |                              |
| 992           | 8/8/2011    | Kitchen Sink              | Upland               |                                                      |                                  |                   |                 |                |               |              |                |                |                |                 |                 | 224                          |
| 993           | 8/8/2011    | Outside Spigot            | Upland               |                                                      |                                  |                   |                 |                |               |              |                |                |                |                 |                 | 276                          |
| 994           | 8/8/2011    | Kitchen Sink              | Valley               |                                                      |                                  |                   |                 |                |               |              |                |                |                |                 |                 | 240                          |
| 995           | 8/8/2011    | Kitchen Sink              | Valley               |                                                      |                                  |                   |                 |                |               |              |                |                |                |                 |                 | 775                          |
| 996           | 8/8/2011    | Spigot on Side Of House   | Upland               |                                                      |                                  |                   |                 |                |               |              |                |                |                |                 |                 | 282                          |
| 997           | 8/8/2011    | Sink In Garage            | Upland               |                                                      |                                  |                   |                 |                |               |              |                |                |                |                 |                 | 364                          |
| 998           | 8/8/2011    | Kitchen Sink              | Upland               |                                                      |                                  |                   |                 |                |               |              |                |                |                |                 |                 | 274                          |
| 999           | 8/8/2011    |                           | Valley               |                                                      |                                  |                   |                 |                |               |              |                |                |                |                 |                 |                              |
| 1000          | 8/8/2011    | Outside Spigot            | Upland               |                                                      |                                  |                   |                 |                |               |              |                |                |                |                 |                 | 270                          |
| 1001          | 8/9/2011    | Basement Sink             | Upland               |                                                      |                                  |                   |                 |                |               |              |                |                |                |                 |                 | 184.1                        |
| 1002          | 8/9/2011    | Kitchen Sink              | Valley               |                                                      |                                  |                   |                 |                |               |              |                |                |                |                 |                 | 349                          |
| 1003          | 8/9/2011    | Pressure Tank             | Valley               |                                                      |                                  |                   |                 |                |               |              |                |                |                |                 |                 | 273                          |
| 1004          | 8/9/2011    | Pressure Tank             | Valley               |                                                      |                                  |                   |                 |                |               |              |                |                |                |                 |                 | 296                          |
| 1005          | 8/9/2011    | Kitchen Sink              | Valley               |                                                      |                                  |                   |                 |                |               |              |                |                |                |                 |                 | 119                          |
| 1006          | 8/9/2011    | Outside Spigot            | Valley               |                                                      |                                  |                   |                 |                |               |              |                |                |                |                 |                 | 249                          |
| 1007          | 12/14/2009  | Basement At Pressure Tank | Valley               |                                                      |                                  |                   | 0.139           |                | 0.354         |              |                |                |                | 6.05            |                 |                              |

Table S.8. Groundwater Quality Data for 1701 "Pre-Drill" Water Well Samples from Susquehanna County, Pennsylvania

| Water Well ID | Sample Date | Sampling Port                | Topographic Location | Gas Extraction Area (Within 1 km of Active Gas Well) | Groundwater Type (If Determined) | Alkalinity (mg/L) | Aluminum (mg/L) | Arsenic (mg/L) | Barium (mg/L) | Boron (mg/L) | Bromide (mg/L) | Cadmium (mg/L) | Calcium (mg/L) | Chloride (mg/L) | Chromium (mg/L) | Conductivity - Field (µs/cm) |
|---------------|-------------|------------------------------|----------------------|------------------------------------------------------|----------------------------------|-------------------|-----------------|----------------|---------------|--------------|----------------|----------------|----------------|-----------------|-----------------|------------------------------|
| 1008          | 8/9/2011    | Bathroom Sink                | Valley               |                                                      |                                  |                   |                 |                |               |              |                |                |                |                 |                 | 294                          |
| 1009          | 8/9/2011    | Outside Spigot               | Valley               |                                                      |                                  |                   |                 |                |               |              |                |                |                |                 |                 | 520                          |
| 1010          | 8/9/2011    | Kitchen Sink                 | Upland               |                                                      |                                  |                   |                 |                |               |              |                |                |                |                 |                 | 161.4                        |
| 1011          | 8/9/2011    | Kitchen Sink                 | Upland               |                                                      |                                  |                   |                 |                |               |              |                |                |                |                 |                 | 253                          |
| 1012          | 8/9/2011    | Kitchen Sink                 | Upland               |                                                      |                                  |                   |                 |                |               |              |                |                |                |                 |                 | 277                          |
| 1013          | 8/9/2011    | Kitchen Sink                 | Valley               |                                                      |                                  |                   |                 |                |               |              |                |                |                |                 |                 | 218                          |
| 1014          | 8/9/2011    | Kitchen Sink                 | Upland               |                                                      |                                  |                   |                 |                |               |              |                |                |                |                 |                 | 278                          |
| 1015          | 8/9/2011    | Kitchen Sink                 | Upland               |                                                      |                                  |                   |                 |                |               |              |                |                |                |                 |                 | 244                          |
| 1016          | 8/9/2011    | Kitchen Sink                 | Upland               |                                                      |                                  |                   |                 |                |               |              |                |                |                |                 |                 | 240                          |
| 1017          | 7/11/2011   | Spigot On Side Of House      | Upland               |                                                      |                                  |                   |                 |                |               |              |                |                |                |                 |                 | 145                          |
| 1018          | 7/12/2011   | Bathroom Sink                | Valley               |                                                      |                                  |                   |                 |                |               |              |                |                |                |                 |                 | 271                          |
| 1019          | 7/12/2011   | Sink In Rear Of Far Building | Valley               |                                                      |                                  |                   |                 |                |               |              |                |                |                |                 |                 | 247                          |
| 1020          | 7/21/2011   | Basement Sink                | Upland               |                                                      |                                  |                   |                 |                |               |              |                |                |                |                 |                 | 170                          |
| 1021          | 7/22/2011   | Kitchen Faucet               | Upland               |                                                      |                                  |                   |                 |                |               |              |                |                |                |                 |                 | 46                           |
| 1022          | 7/25/2011   | Spigot Outside Barn          | Valley               |                                                      |                                  |                   |                 |                |               |              |                |                |                |                 |                 | 346                          |
| 1023          | 7/25/2011   | Kitchen Sink                 | Upland               |                                                      |                                  |                   |                 |                |               |              |                |                |                |                 |                 | 114                          |
| 1024          | 7/26/2011   | Outside Spigot               | Upland               |                                                      |                                  |                   |                 |                |               |              |                |                |                |                 |                 | 232                          |
| 1025          | 7/28/2011   |                              | Valley               |                                                      |                                  |                   |                 |                |               |              |                |                |                |                 |                 |                              |
| 1026          | 8/1/2011    | Kitchen Sink                 | Valley               |                                                      |                                  |                   |                 |                |               |              |                |                |                |                 |                 | 166                          |
| 1027          | 8/1/2011    | Kitchen Sink                 | Valley               |                                                      |                                  |                   |                 |                |               |              |                |                |                |                 |                 | 207                          |
| 1028          | 8/1/2011    | Outside Spigot               | Upland               |                                                      |                                  |                   |                 |                |               |              |                |                |                |                 |                 | 151                          |
| 1029          | 8/2/2011    | Pipe Overflow                | Valley               |                                                      |                                  |                   |                 |                |               |              |                |                |                |                 |                 | 175                          |
| 1030          | 8/2/2011    | Kitchen Faucet               | Valley               |                                                      |                                  |                   |                 |                |               |              |                |                |                |                 |                 |                              |

Table S.8. Groundwater Quality Data for 1701 "Pre-Drill" Water Well Samples from Susquehanna County, Pennsylvania

| Water Well ID | Sample Date | Sampling Port                 | Topographic Location | Gas Extraction Area (Within 1 km of Active Gas Well) | Groundwater Type (If Determined) | Alkalinity (mg/L) | Aluminum (mg/L) | Arsenic (mg/L) | Barium (mg/L) | Boron (mg/L) | Bromide (mg/L) | Cadmium (mg/L) | Calcium (mg/L) | Chloride (mg/L) | Chromium (mg/L) | Conductivity - Field (µs/cm) |
|---------------|-------------|-------------------------------|----------------------|------------------------------------------------------|----------------------------------|-------------------|-----------------|----------------|---------------|--------------|----------------|----------------|----------------|-----------------|-----------------|------------------------------|
| 1031          | 8/3/2011    | Garage Building Next To House | Valley               |                                                      |                                  |                   |                 |                |               |              |                |                |                |                 |                 | 190                          |
| 1032          | 8/3/2011    | Kitchen Sink                  | Upland               |                                                      |                                  |                   |                 |                |               |              |                |                |                |                 |                 | 240                          |
| 1033          | 8/3/2011    | Outside Faucet                | Upland               |                                                      |                                  |                   |                 |                |               |              |                |                |                |                 |                 | 259                          |
| 1034          | 8/3/2011    | Kitchen Faucet                | Valley               |                                                      |                                  |                   |                 |                |               |              |                |                |                |                 |                 |                              |
| 1035          | 12/15/2009  | Well House                    | Valley               | Yes                                                  |                                  |                   | < .1            |                | 1.04          |              |                |                |                | 136             |                 |                              |
| 1036          | 8/3/2011    | Pressure Tank                 | Upland               |                                                      |                                  |                   |                 |                |               |              |                |                |                |                 |                 | 632                          |
| 1037          | 8/3/2011    | Pressure Tank                 | Upland               |                                                      |                                  |                   |                 |                |               |              |                |                |                |                 |                 | 289                          |
| 1038          | 8/3/2011    | Kitchen Sink                  | Valley               |                                                      |                                  |                   |                 |                |               |              |                |                |                |                 |                 | 378                          |
| 1039          | 8/3/2011    | Outside Faucet                | Valley               | Yes                                                  |                                  |                   |                 |                |               |              |                |                |                |                 |                 | 285                          |
| 1040          | 8/3/2011    | Outside Faucet                | Valley               |                                                      |                                  |                   |                 |                |               |              |                |                |                |                 |                 | 334                          |
| 1041          | 8/3/2011    | Outside Faucet                | Upland               | Yes                                                  |                                  |                   |                 |                |               |              |                |                |                |                 |                 | 374                          |
| 1042          | 8/3/2011    | Kitchen Sink                  | Upland               |                                                      |                                  |                   |                 |                |               |              |                |                |                |                 |                 | 143                          |
| 1043          | 8/3/2011    | Pressure Tank                 | Valley               |                                                      |                                  |                   |                 |                |               |              |                |                |                |                 |                 | 264                          |
| 1044          | 1/3/2010    | Pressure Tank                 | Valley               |                                                      |                                  |                   | < .1            |                | 0.069         |              |                |                |                | 2.26            |                 | 131.4                        |
| 1045          | 8/3/2011    | Spigot                        | Valley               |                                                      |                                  |                   |                 |                |               |              |                |                |                |                 |                 | 328                          |
| 1046          | 8/3/2011    | Barn Sink                     | Valley               |                                                      |                                  |                   |                 |                |               |              |                |                |                |                 |                 | 307                          |
| 1047          | 8/3/2011    | Kitchen Sink                  | Valley               |                                                      |                                  |                   |                 |                |               |              |                |                |                |                 |                 | 274                          |
| 1048          | 8/3/2011    | Kitchen Sink                  | Valley               |                                                      |                                  |                   |                 |                |               |              |                |                |                |                 |                 | 257                          |
| 1049          | 8/3/2011    | Outside Spigot                | Valley               |                                                      |                                  |                   |                 |                |               |              |                |                |                |                 |                 | 375                          |
| 1050          | 8/3/2011    | Kitchen Sink                  | Upland               |                                                      |                                  |                   |                 |                |               |              |                |                |                |                 |                 | 218                          |
| 1051          | 8/3/2011    | Kitchen Sink                  | Upland               |                                                      |                                  |                   |                 |                |               |              |                |                |                |                 |                 | 187                          |
| 1052          | 8/3/2011    | Kitchen Sink                  | Upland               |                                                      |                                  |                   |                 |                |               |              |                |                |                |                 |                 | 162                          |
| 1053          | 8/3/2011    | Kitchen Sink                  | Valley               |                                                      |                                  |                   |                 |                |               |              |                |                |                |                 |                 | 129                          |
| 1054          | 8/3/2011    | Pressure Tank In Basement     | Upland               |                                                      |                                  |                   |                 |                |               |              |                |                |                |                 |                 | 122                          |
| 1055          | 8/3/2011    | Kitchen Sink                  | Valley               |                                                      |                                  |                   |                 |                |               |              |                |                |                |                 |                 | 127                          |

Table S.8. Groundwater Quality Data for 1701 "Pre-Drill" Water Well Samples from Susquehanna County, Pennsylvania

| Water Well ID | Sample Date | Sampling Port              | Topographic Location | Gas Extraction Area (Within 1 km of Active Gas Well) | Groundwater Type (If Determined) | Alkalinity (mg/L) | Aluminum (mg/L) | Arsenic (mg/L) | Barium (mg/L) | Boron (mg/L) | Bromide (mg/L) | Cadmium (mg/L) | Calcium (mg/L) | Chloride (mg/L) | Chromium (mg/L) | Conductivity - Field (µs/cm) |
|---------------|-------------|----------------------------|----------------------|------------------------------------------------------|----------------------------------|-------------------|-----------------|----------------|---------------|--------------|----------------|----------------|----------------|-----------------|-----------------|------------------------------|
| 1056          | 8/3/2011    | Kitchen Sink               | Upland               |                                                      |                                  |                   |                 |                |               |              |                |                |                |                 |                 | 105                          |
| 1057          | 8/4/2011    | Kitchen Sink               | Valley               |                                                      |                                  |                   |                 |                |               |              |                |                |                |                 |                 | 159.6                        |
| 1058          | 8/4/2011    | Outside Spigot             | Upland               |                                                      |                                  |                   |                 |                |               |              |                |                |                |                 |                 | 114                          |
| 1059          | 8/4/2011    | Outside Spigot             | Upland               |                                                      |                                  |                   |                 |                |               |              |                |                |                |                 |                 | 259                          |
| 1060          | 12/21/2009  | Laundry Sink               | Upland               |                                                      |                                  |                   | < .1            |                | 0.142         |              |                |                |                | 36.5            |                 | 410                          |
| 1061          | 8/4/2011    | Spigot On Side Of House    | Upland               |                                                      |                                  |                   |                 |                |               |              |                |                |                |                 |                 | 136                          |
| 1062          | 8/4/2011    | Spigot Behind House        | Valley               |                                                      |                                  |                   |                 |                |               |              |                |                |                |                 |                 | 683                          |
| 1063          | 8/4/2011    | Kitchen Sink               | Valley               |                                                      |                                  |                   |                 |                |               |              |                |                |                |                 |                 | 219                          |
| 1064          | 8/4/2011    | Kitchen Sink               | Valley               |                                                      |                                  |                   |                 |                |               |              |                |                |                |                 |                 | 143.3                        |
| 1065          | 8/4/2011    | Kitchen Sink               | Valley               |                                                      |                                  |                   |                 |                |               |              |                |                |                |                 |                 | 220                          |
| 1066          | 8/4/2011    | Outside Spigot             | Upland               |                                                      |                                  |                   |                 |                |               |              |                |                |                |                 |                 | 249                          |
| 1067          | 8/4/2011    | Kitchen Sink               | Upland               |                                                      |                                  |                   |                 |                |               |              |                |                |                |                 |                 | 124                          |
| 1068          | 8/4/2011    | Spigot In Rear Of Building | Valley               | Yes                                                  |                                  |                   |                 |                |               |              |                |                |                |                 |                 | 95                           |
| 1069          | 4/4/2009    | Bathroom Sink First Floor  | Valley               |                                                      |                                  |                   | < .05           |                | 0.041         |              |                |                |                | < 2             |                 |                              |
| 1070          | 12/28/2009  | Kitchen Sink               | Upland               |                                                      |                                  |                   | < .1            |                | 0.137         |              |                |                |                | 16.5            |                 | 301                          |
| 1071          | 8/4/2011    | Pressure Tank              | Valley               | Yes                                                  |                                  |                   |                 |                |               |              |                |                |                |                 |                 | 355                          |
| 1072          | 8/4/2011    | Kitchen Sink               | Valley               | Yes                                                  |                                  |                   |                 |                |               |              |                |                |                |                 |                 | 333                          |
| 1073          | 8/4/2011    | Kitchen Sink               | Valley               | Yes                                                  |                                  |                   |                 |                |               |              |                |                |                |                 |                 | 579                          |
| 1074          | 8/4/2011    | Spigot In Warehouse        | Upland               |                                                      |                                  |                   |                 |                |               |              |                |                |                |                 |                 | 147                          |
| 1075          | 8/4/2011    | Kitchen Sink               | Upland               |                                                      |                                  |                   |                 |                |               |              |                |                |                |                 |                 | 120                          |
| 1076          | 8/4/2011    | Kitchen Sink               | Upland               |                                                      |                                  |                   |                 |                |               |              |                |                |                |                 |                 | 372                          |
| 1077          | 8/4/2011    | Kitchen Sink               | Valley               |                                                      |                                  |                   |                 |                |               |              |                |                |                |                 |                 | 377                          |

Table S.8. Groundwater Quality Data for 1701 "Pre-Drill" Water Well Samples from Susquehanna County, Pennsylvania

| Water Well ID | Sample Date | Sampling Port                            | Topographic Location | Gas Extraction Area (Within 1 km of Active Gas Well) | Groundwater Type (If Determined) | Alkalinity (mg/L) | Aluminum (mg/L) | Arsenic (mg/L) | Barium (mg/L) | Boron (mg/L) | Bromide (mg/L) | Cadmium (mg/L) | Calcium (mg/L) | Chloride (mg/L) | Chromium (mg/L) | Conductivity - Field (µs/cm) |
|---------------|-------------|------------------------------------------|----------------------|------------------------------------------------------|----------------------------------|-------------------|-----------------|----------------|---------------|--------------|----------------|----------------|----------------|-----------------|-----------------|------------------------------|
| 1078          | 1/10/2010   | Little Farm House Basement Pressure Tank | Upland               |                                                      |                                  |                   | < .1            |                | 0.092         |              |                |                |                | 71.7            |                 |                              |
| 1079          | 8/4/2011    | Kitchen Sink                             | Upland               |                                                      |                                  |                   |                 |                |               |              |                |                |                |                 |                 | 272                          |
| 1080          | 8/4/2011    | Spigot On Side Of House                  | Valley               |                                                      |                                  |                   |                 |                |               |              |                |                |                |                 |                 | 165                          |
| 1081          | 8/4/2011    | Kitchen Sink                             | Upland               |                                                      |                                  |                   |                 |                |               |              |                |                |                |                 |                 | 237                          |
| 1082          | 8/4/2011    | Kitchen Sink                             | Valley               |                                                      |                                  |                   |                 |                |               |              |                |                |                |                 |                 | 229                          |
| 1083          | 7/11/2011   | Outside Hose Bib                         | Upland               | Yes                                                  | Calcium-Sodium-Bicarbonate       | 96                | <0.03           | 0.0021         | 0.12          |              | <0.2           | <0.001         | 23             | 16              | <0.002          |                              |
| 1084          | 7/11/2011   | Basement At Pressure Tank                | Upland               | Yes                                                  | Sodium-Bicarbonate               | 180               | < .03           | 0.0026         | 0.078         |              | < .2           | < .001         | 8.7            | 48              | < .002          | 0.354                        |
| 1085          | 12/21/2009  |                                          | Valley               | Yes                                                  |                                  |                   | < .1            |                | 0.051         |              |                |                |                | 4.43            |                 |                              |
| 1086          | 7/11/2011   | Bathroom Sink First Floor                | Valley               | Yes                                                  | Calcium-Bicarbonate              | 85                | < .03           | < .001         | 0.043         |              | < .2           | < .001         | 27             | 1.9             | < .002          | 0.157                        |
| 1087          | 7/12/2011   | Outside Hose Bib                         | Upland               | Yes                                                  | Calcium-Bicarbonate              | 130               | < .03           | 0.0015         | 0.027         |              | < .2           | < .001         | 27             | < 1             | < .002          | 0.173                        |
| 1088          | 7/12/2011   | Kitchen Sink                             | Valley               | Yes                                                  | Calcium-Bicarbonate              | 140               | < .03           | < .001         | 0.092         |              | < .2           | < .001         | 32             | 13              | < .002          | 0.261                        |
| 1089          | 7/12/2011   | Pressure Tank                            | Valley               | Yes                                                  | Calcium-Bicarbonate              | 130               | 0.044           | < .001         | 0.11          |              | < .2           | < .001         | 27             | 4.7             | < .002          | 0.211                        |
| 1090          | 12/21/2009  | Pressure Tank                            | Valley               | Yes                                                  |                                  |                   | < .1            |                | 8.06          |              |                |                |                | 559             |                 | 1401                         |
| 1091          | 7/13/2011   | Pressure Tank In Basement                | Upland               |                                                      | Calcium-Bicarbonate              | 170               | < .03           | < .001         | 0.15          |              | < .2           | < .001         | 39             | 3.6             | < .002          | 0.748                        |
| 1092          | 7/13/2011   | Well                                     | Valley               |                                                      | Calcium-Bicarbonate              | 140               | < .03           | 0.001          | 0.012         |              | < .2           | < .001         | 33             | 1.6             | < .002          |                              |
| 1093          | 7/13/2011   | Outside Hose Bib                         | Upland               | Yes                                                  | Calcium-Bicarbonate              | 84                | 0.036           | 0.0011         | 0.038         |              | < .2           | < .001         | 28             | 2.9             | < .002          | 0.196                        |
| 1094          | 12/14/2009  | Pressure Tank In Basement                | Valley               | Yes                                                  |                                  |                   | 0.176           |                | 0.041         |              |                |                |                | 2.15            |                 |                              |
| 1095          | 7/13/2011   | Well                                     | Valley               | Yes                                                  | Calcium-Bicarbonate              | 120               | < .03           | < .001         | 0.064         |              | < .2           | < .001         | 30             | < 1             | < .002          | 0.23                         |
| 1096          | 7/13/2011   | Pressure Tank                            | Valley               | Yes                                                  | Calcium-Bicarbonate              | 52                | 0.039           | < .001         | 0.047         |              | < .2           | < .001         | 18             | 1.9             | < .002          | 0.124                        |
| 1097          | 1/3/2010    | Spigot Under House                       | Upland               | Yes                                                  |                                  |                   | < .1            |                | 0.053         |              |                |                |                | 14              |                 |                              |
| 1098          | 12/17/2009  | Pressure Tank                            | Upland               |                                                      |                                  |                   | < .1            |                | 0.615         |              |                |                |                | 14.6            |                 | 607                          |



**Table S.8. Groundwater Quality Data for 1701 "Pre-Drill" Water Well Samples from Susquehanna County, Pennsylvania**

| Water Well ID | Sample Date | Sampling Port                            | Topographic Location | Gas Extraction Area (Within 1 km of Active Gas Well) | Groundwater Type (If Determined) | Alkalinity (mg/L) | Aluminum (mg/L) | Arsenic (mg/L) | Barium (mg/L) | Boron (mg/L) | Bromide (mg/L) | Cadmium (mg/L) | Calcium (mg/L) | Chloride (mg/L) | Chromium (mg/L) | Conductivity - Field (µs/cm) |
|---------------|-------------|------------------------------------------|----------------------|------------------------------------------------------|----------------------------------|-------------------|-----------------|----------------|---------------|--------------|----------------|----------------|----------------|-----------------|-----------------|------------------------------|
| 1099          | 1/5/2010    | Kitchen Sink                             | Valley               | Yes                                                  |                                  |                   | < .1            |                | 7.19          |              |                |                |                | 361             |                 | 964                          |
| 1100          | 7/18/2011   | Outside Faucet                           | Valley               | Yes                                                  | Calcium-Bicarbonate              | 41                | < .03           | < .001         | 0.069         |              | < .02          | < .001         | 19             | 3.7             | < .002          |                              |
| 1101          | 12/13/2009  |                                          | Upland               |                                                      |                                  |                   | < .1            |                | 0.114         |              |                |                |                | 6.93            |                 |                              |
| 1102          | 7/19/2011   | Inside Faucet                            | Valley               | Yes                                                  | Calcium-Bicarbonate              | 130               | < .03           | 0.0012         | 0.065         |              | < .2           | < .001         | 37             | 1               | < .002          | 0.177                        |
| 1103          | 7/20/2011   | Kitchen Sink Cold Water Tap              | Upland               |                                                      | Calcium-Bicarbonate              | 52                | < .03           | < .001         | 0.076         |              | 0.22           | < .001         | 12             | 3.2             | < .002          | 0.098                        |
| 1104          | 7/20/2011   | Pressure Tank                            | Upland               |                                                      | Calcium-Bicarbonate              | 120               | < .03           | < .001         | 0.078         |              | < .2           | < .001         | 38             | 7.4             | < .002          | 0.202                        |
| 1105          | 12/28/2009  | Pressure Tank                            | Upland               |                                                      |                                  |                   | < .1            |                | 0.193         |              |                |                |                | 48.7            |                 | 428                          |
| 1106          | 7/20/2011   | Frost Free Hydrant 2 Feet From Well Head | Upland               |                                                      | Calcium-Bicarbonate              | 100               | < .03           | 0.001          | 0.13          |              | < .2           | < .001         | 26             | 1.4             | < .002          | 0.165                        |
| 1107          | 7/20/2011   | Inside Faucet                            | Upland               |                                                      | Calcium-Bicarbonate              | 100               | < .03           | 0.0017         | 0.11          |              | < .2           | < .001         | 33             | 8.9             | < .002          | 0.196                        |
| 1108          | 12/13/2009  | Pressure Tank                            | Upland               |                                                      |                                  |                   | < .1            |                | 0.171         |              |                |                |                | 5.51            |                 |                              |
| 1109          | 12/28/2009  | Pressure Tank                            | Upland               |                                                      |                                  |                   | < .1            |                | < .025        |              |                |                |                | 11.8            |                 | 427                          |
| 1110          | 7/26/2011   | Pressure Tank In Gun Shop                | Valley               |                                                      | Sodium-Bicarbonate               | 180               | < .03           | < .001         | 0.76          |              | 0.34           | < .001         | 15             | 35              | < .002          | 486                          |
| 1111          | 12/16/2009  | Kitchen Sink                             | Valley               | Yes                                                  |                                  |                   | < .1            |                | 0.044         |              |                |                |                | 21.6            |                 |                              |
| 1112          | 7/26/2011   | Inside Faucet                            | Valley               |                                                      | Calcium-Sodium-Bicarbonate       | 140               | < .03           | 0.0018         | 0.16          |              | < .2           | < .001         | 22             | 12              | < .002          | 0.247                        |
| 1113          | 7/27/2011   | Outside Spigot Near Large Rock Slabs     | Valley               |                                                      | Sodium-Bicarbonate               | 140               | < .03           | < .001         | 0.77          |              | < .2           | < .001         | 11             | 2.1             | < .002          | 297                          |
| 1114          | 12/13/2009  | Pressure Tank                            | Upland               | Yes                                                  |                                  |                   | < .1            |                | 0.075         |              |                |                |                | 2.74            |                 |                              |
| 1115          | 7/27/2011   | Outside Faucet                           | Upland               |                                                      | Calcium-Bicarbonate              | 95                | 0.35            | < .001         | 0.12          |              | < .2           | < .001         | 32             | 2.5             | < .002          | 166                          |
| 1116          | 7/27/2011   | Kitchen Sink Cold Water Tap              | Valley               | Yes                                                  | Calcium-Bicarbonate              | 140               | < .03           | 0.0012         | 0.045         |              | < .2           | < .001         | 44             | 3.9             | < .002          | 0.196                        |
| 1117          | 1/11/2010   | Pressure Tank                            | Upland               |                                                      |                                  |                   | < .1            |                | 1.48          |              |                |                |                | 59.3            |                 |                              |
| 1118          | 7/27/2011   | Kitchen Sink Faucet                      | Upland               |                                                      | Calcium-Bicarbonate              | 54                | < .03           | < .001         | 0.12          |              | < .2           | < .001         | 21             | 4.1             | < .002          | 0.093                        |
| 1119          | 7/27/2011   | Outside Hose Bib                         | Upland               |                                                      | Calcium-Bicarbonate              | 120               | < .03           | 0.0011         | 0.12          |              | < .2           | < .001         | 37             | 3.6             | < .002          | 0.195                        |
| 1120          | 7/28/2011   | Kitchen Sink                             | Valley               |                                                      | Calcium-Bicarbonate              | 120               | < .03           | 0.0016         | 0.22          |              | < .2           | < .001         | 28             | 5.6             | < .002          | 0.232                        |

Table S.8. Groundwater Quality Data for 1701 "Pre-Drill" Water Well Samples from Susquehanna County, Pennsylvania

| Water Well ID | Sample Date | Sampling Port                  | Topographic Location | Gas Extraction Area (Within 1 km of Active Gas Well) | Groundwater Type (If Determined) | Alkalinity (mg/L) | Aluminum (mg/L) | Arsenic (mg/L) | Barium (mg/L) | Boron (mg/L) | Bromide (mg/L) | Cadmium (mg/L) | Calcium (mg/L) | Chloride (mg/L) | Chromium (mg/L) | Conductivity - Field (µs/cm) |
|---------------|-------------|--------------------------------|----------------------|------------------------------------------------------|----------------------------------|-------------------|-----------------|----------------|---------------|--------------|----------------|----------------|----------------|-----------------|-----------------|------------------------------|
| 1121          | 7/28/2011   | Inside Faucet                  | Valley               |                                                      | Calcium-Bicarbonate              | 120               | < .03           | < .001         | 0.14          |              | < .2           | < .001         | 21             | 2.1             | < .002          | 184                          |
| 1122          | 7/28/2011   | Outside Faucet                 | Valley               |                                                      | Calcium-Bicarbonate              | 120               | < .03           | 0.0014         | 0.28          |              | < .2           | < .001         | 24             | 2.7             | < .002          | 160                          |
| 1123          | 7/29/2011   | Pressure Tank                  | Upland               | Yes                                                  | Calcium-Bicarbonate              | 62                | < .03           | < .001         | 0.11          |              | < .2           | < .001         | 25             | 15              | < .002          |                              |
| 1124          | 7/29/2011   | Kitchen Sink                   | Valley               |                                                      | Calcium-Bicarbonate              | 27                | 0.067           | < .001         | 0.035         |              | < .2           | < .001         | 6.2            | 1               | < .002          | 0.093                        |
| 1125          | 7/29/2011   | Pressure Tank                  | Valley               |                                                      | Calcium-Bicarbonate              | 80                | < .03           | < .001         | 0.043         |              | < .2           | < .001         | 19             | 2               | < .002          | 210                          |
| 1126          | 8/1/2011    | Outside Faucet                 | Upland               |                                                      | Calcium-Bicarbonate              | 110               | < .03           | < .001         | 0.16          |              | < .2           | < .001         | 22             | 2               | < .002          | 86                           |
| 1127          | 8/1/2011    | Outside Faucet                 | Valley               |                                                      | Calcium-Bicarbonate              | 30                | 0.051           | < .001         | 0.062         |              | < .2           | < .001         | 8.7            | 1.1             | < .002          | 86                           |
| 1128          | 8/1/2011    | Pressure Tank At Basement      | Upland               | Yes                                                  | Calcium-Bicarbonate              | 130               | 0.031           | < .001         | 0.093         |              | < .2           | < .001         | 40             | 1.6             | < .002          | 0.218                        |
| 1129          | 8/2/2011    |                                | Upland               | Yes                                                  |                                  | 110               | <0.03           | <0.001         | 0.074         |              |                | <0.001         | 34             |                 | <0.002          |                              |
| 1130          | 12/28/2009  | Kitchen Sink                   | Valley               |                                                      |                                  |                   | < .1            |                | 0.102         |              |                |                |                | 5               |                 |                              |
| 1131          | 8/3/2011    | Kitchen Sink                   | Upland               | Yes                                                  | Calcium-Bicarbonate-Chloride     | 69                | <.03            | 0.0059         | 0.1           |              | <.2            | < .001         | 39             | 24              | <.002           |                              |
| 1132          | 8/3/2011    | Pressure Tank                  | Valley               |                                                      | Calcium-Sodium-Bicarbonate       | 110               | < .03           | < .001         | 0.69          |              | < .2           | < .001         | 16             | 4.5             | < .002          | 0.169                        |
| 1133          | 10/22/2009  |                                | Upland               | Yes                                                  |                                  |                   | < .1            |                | 0.15          |              |                |                | 8.65           |                 |                 |                              |
| 1134          | 12/28/2009  | Garage Sink                    | Upland               |                                                      |                                  |                   | < .1            |                | 0.182         |              |                |                | 86.1           |                 |                 |                              |
| 1135          | 8/4/2011    | Bathroom Sink Cwt On South End | Upland               |                                                      | Calcium-Bicarbonate              | 83                | < .03           | < .001         | 0.11          |              | < .2           | < .001         | 20             | 2               | < .002          | 0.16                         |
| 1136          | 8/4/2011    | Bailed Well                    | Upland               | Yes                                                  | Calcium-Bicarbonate-Chloride     | 56                | 0.038           | 0.0039         | 0.069         |              | < .2           | < .001         | 23             | 18              | < .002          | 0.21                         |
| 1137          | 8/4/2011    | Kitchen Sink                   | Upland               | Yes                                                  | Calcium-Bicarbonate              | 120               | 0.16            | 0.003          | 0.15          |              | < .2           | < .001         | 38             | 1.2             | < .002          | 0.137                        |
| 1138          | 8/4/2011    | Pressure Tank                  | Valley               | Yes                                                  | Calcium-Bicarbonate              | 170               | 0.033           | < .001         | 0.086         |              | < .2           | < .001         | 45             | 2.3             | < .002          | 0.297                        |
| 1139          | 5/19/2011   |                                | Valley               |                                                      | Calcium-Sodium-Bicarbonate       | 140               | <0.03           | <0.001         | 0.57          |              | 0.22           | <0.001         | 15             | 3.6             | <0.002          |                              |
| 1140          | 7/25/2011   | Kitchen Sink                   | Valley               |                                                      | Calcium-Sodium-Bicarbonate       | 180               | < .03           | 0.0012         | 0.17          |              | < .2           | < .001         | 25             | 4.4             | < .002          | 282                          |
| 1141          | 7/27/2011   | Outside Spigot Under Back Deck | Valley               |                                                      | Calcium-Bicarbonate              | 110               | 0.032           | 0.002          | 0.67          |              | < .2           | < .001         | 19             | 4               | < .002          | 250                          |
| 1142          | 8/2/2011    | Pressure Tank                  | Valley               |                                                      | Calcium-Bicarbonate              | 76                | 0.11            | < .001         | 0.093         |              | < .2           | < .001         | 18             | 3.1             | < .002          | 201                          |

Table S.8. Groundwater Quality Data for 1701 "Pre-Drill" Water Well Samples from Susquehanna County, Pennsylvania

| Water Well ID | Sample Date | Sampling Port             | Topographic Location | Gas Extraction Area (Within 1 km of Active Gas Well) | Groundwater Type (If Determined)    | Alkalinity (mg/L) | Aluminum (mg/L) | Arsenic (mg/L) | Barium (mg/L) | Boron (mg/L) | Bromide (mg/L) | Cadmium (mg/L) | Calcium (mg/L) | Chloride (mg/L) | Chromium (mg/L) | Conductivity - Field (µs/cm) |
|---------------|-------------|---------------------------|----------------------|------------------------------------------------------|-------------------------------------|-------------------|-----------------|----------------|---------------|--------------|----------------|----------------|----------------|-----------------|-----------------|------------------------------|
| 1143          | 8/2/2011    | Outside Faucet            | Upland               |                                                      | Calcium-Bicarbonate                 | 72                | < .03           | < .001         | 0.078         |              | < .2           | < .001         | 17             | 2.1             | < .002          | 180                          |
| 1144          | 1/3/2010    | Kitchen Sink              | Upland               | Yes                                                  |                                     |                   | < .1            |                | 0.054         |              |                |                |                | 21.8            |                 |                              |
| 1145          | 12/13/2009  |                           | Upland               | Yes                                                  |                                     |                   | < .1            |                | 0.035         |              |                |                |                | 10.2            |                 |                              |
| 1146          | 1/10/2010   | Spring House              | Upland               |                                                      |                                     |                   | < .1            |                | 0.13          |              |                |                |                | 119             |                 |                              |
| 1147          | 1/5/2010    | Pressure Tank             | Upland               |                                                      |                                     |                   | < .1            |                | 0.059         |              |                |                |                | 5.77            |                 |                              |
| 1148          | 5/10/2011   | Kitchen Sink              | Valley               |                                                      | Sodium-Bicarbonate                  | 145               | < .05           | < .003         | 0.384         |              | < 1            | < .002         | 9.44           | 27.4            | < .005          | 259                          |
| 1149          | 2/1/2010    | Pressure Tank             | Upland               |                                                      |                                     |                   | < .1            |                | 0.04          |              |                |                |                | 18.1            |                 |                              |
| 1150          | 8/20/2009   |                           | Valley               |                                                      |                                     |                   | 0.165           |                | 0.369         |              |                |                |                | 430             |                 |                              |
| 1151          | 12/6/2009   | Washroom Sink             | Valley               |                                                      |                                     |                   | < .1            |                | 0.068         |              |                |                |                | 5.53            |                 |                              |
| 1152          | 1/17/2010   | Kitchen Sink              | Valley               |                                                      |                                     |                   | < .1            |                | 0.23          |              |                |                |                | 64.8            |                 |                              |
| 1153          | 1/14/2010   | Basement At Pressure Tank | Upland               |                                                      |                                     |                   | < .1            |                | 0.046         |              |                |                |                | 8.19            |                 | 361                          |
| 1154          | 1/17/2010   | Kitchen Sink              | Upland               |                                                      |                                     |                   | < .1            |                | 0.124         |              |                |                |                | 21.8            |                 |                              |
| 1155          | 1/17/2010   | Pressure Tank             | Valley               |                                                      |                                     |                   | < .1            |                | 0.084         |              |                |                |                | 32.7            |                 | 115.7                        |
| 1156          | 12/11/2010  | Kitchen Sink              | Valley               |                                                      | Calcium-Sodium-Bicarbonate-Chloride | 20                | 0.027           | <0.001         | 0.033         |              |                | <0.0001        | 12             | 16.6            | <0.002          |                              |
| 1157          | 8/4/2011    | Spigot Back Yard          | Upland               |                                                      |                                     |                   |                 |                |               |              |                |                |                |                 |                 | 407                          |
| 1158          | 8/4/2011    | Kitchen Sink              | Valley               |                                                      |                                     |                   |                 |                |               |              |                |                |                |                 |                 | 390                          |
| 1159          | 8/4/2011    | Pressure Tank             | Valley               |                                                      |                                     |                   |                 |                |               |              |                |                |                |                 |                 | 138                          |
| 1160          | 8/10/2011   |                           | Upland               |                                                      | Calcium-Sodium-Chloride             | 80                | < .01           | < .001         | 4.3           |              | 5.24           | < .0001        | 40             | 174             | < .002          |                              |
| 1161          | 8/10/2011   | Kitchen Sink              | Valley               |                                                      |                                     |                   |                 |                |               |              |                |                |                |                 |                 | 262                          |
| 1162          | 8/10/2011   | Kitchen Sink              | Upland               |                                                      |                                     |                   |                 |                |               |              |                |                |                |                 |                 | 236                          |
| 1163          | 8/10/2011   | Spigot On Side Of House   | Upland               |                                                      |                                     |                   |                 |                |               |              |                |                |                |                 |                 |                              |
| 1164          | 8/10/2011   | Outside Spigot            | Valley               |                                                      |                                     |                   |                 |                |               |              |                |                |                |                 |                 | 2.68                         |
| 1165          | 8/10/2011   | Kitchen Sink              | Valley               |                                                      |                                     |                   |                 |                |               |              |                |                |                |                 |                 | 3.53                         |

Table S.8. Groundwater Quality Data for 1701 "Pre-Drill" Water Well Samples from Susquehanna County, Pennsylvania

| Water Well ID | Sample Date | Sampling Port             | Topographic Location | Gas Extraction Area (Within 1 km of Active Gas Well) | Groundwater Type (If Determined) | Alkalinity (mg/L) | Aluminum (mg/L) | Arsenic (mg/L) | Barium (mg/L) | Boron (mg/L) | Bromide (mg/L) | Cadmium (mg/L) | Calcium (mg/L) | Chloride (mg/L) | Chromium (mg/L) | Conductivity - Field (µs/cm) |
|---------------|-------------|---------------------------|----------------------|------------------------------------------------------|----------------------------------|-------------------|-----------------|----------------|---------------|--------------|----------------|----------------|----------------|-----------------|-----------------|------------------------------|
| 1166          | 8/10/2011   | Spigot On Side Of Shed    | Valley               |                                                      |                                  |                   |                 |                |               |              |                |                |                |                 |                 | 233                          |
| 1167          | 8/10/2011   | Outside Spigot            | Upland               |                                                      |                                  |                   |                 |                |               |              |                |                |                |                 |                 |                              |
| 1168          | 8/10/2011   | Kitchen Sink              | Upland               |                                                      |                                  |                   |                 |                |               |              |                |                |                |                 |                 | 62.9                         |
| 1169          | 8/10/2011   | Outside Spigot            | Upland               |                                                      |                                  |                   |                 |                |               |              |                |                |                |                 |                 | 306                          |
| 1170          | 8/10/2011   | Kitchen Sink              | Upland               |                                                      |                                  |                   |                 |                |               |              |                |                |                |                 |                 | 338                          |
| 1171          | 8/10/2011   | Dug Well                  | Upland               |                                                      |                                  |                   |                 |                |               |              |                |                |                |                 |                 |                              |
| 1172          | 8/10/2011   | Shop Sink                 | Upland               |                                                      |                                  |                   |                 |                |               |              |                |                |                |                 |                 | 360                          |
| 1173          | 12/10/2009  | Kitchen Sink              | Valley               | Yes                                                  |                                  |                   | < .1            |                | 0.133         |              |                |                |                | 2.51            |                 |                              |
| 1174          | 8/11/2011   | Kitchen Sink              | Upland               |                                                      |                                  |                   |                 |                |               |              |                |                |                |                 |                 | 243                          |
| 1175          | 8/11/2011   | Kitchen Sink              | Upland               |                                                      |                                  |                   |                 |                |               |              |                |                |                |                 |                 | 253                          |
| 1176          | 8/11/2011   | Outside Spigot            | Valley               |                                                      |                                  |                   |                 |                |               |              |                |                |                |                 |                 | 683                          |
| 1177          | 8/11/2011   | Kitchen Sink              | Upland               |                                                      |                                  |                   |                 |                |               |              |                |                |                |                 |                 | 299                          |
| 1178          | 8/14/2011   | Outside Spigot            | Valley               |                                                      |                                  |                   |                 |                |               |              |                |                |                |                 |                 | 193.1                        |
| 1179          | 8/15/2011   | Hand Dug Well             | Upland               |                                                      |                                  |                   |                 |                |               |              |                |                |                |                 |                 | 115.2                        |
| 1180          | 8/16/2011   | Kitchen Sink              | Upland               |                                                      |                                  |                   |                 |                |               |              |                |                |                |                 |                 | 203                          |
| 1181          | 1/14/2010   | Basement Pressure Tank    | Valley               |                                                      |                                  |                   | < .1            |                | 0.054         |              |                |                |                | 3.9             |                 | 79.3                         |
| 1182          | 8/16/2011   | Dug Well                  | Upland               |                                                      |                                  |                   |                 |                |               |              |                |                |                |                 |                 | 42.3                         |
| 1183          | 8/16/2011   | Kitchen Sink              | Valley               |                                                      |                                  |                   |                 |                |               |              |                |                |                |                 |                 | 206                          |
| 1184          | 2/1/2010    | Elementary Boiler Room    | Upland               | Yes                                                  |                                  |                   | < .1            |                | 0.163         |              |                |                |                | 14.1            |                 |                              |
| 1185          | 8/17/2011   | Kitchen Sink              | Valley               |                                                      |                                  |                   |                 |                |               |              |                |                |                |                 |                 | 298                          |
| 1186          | 8/19/2011   | Kitchen Sink              | Upland               |                                                      |                                  |                   |                 |                |               |              |                |                |                |                 |                 | 176                          |
| 1187          | 8/19/2011   | Kitchen Sink              | Valley               |                                                      |                                  |                   |                 |                |               |              |                |                |                |                 |                 | 71                           |
| 1188          | 8/29/2011   | Outside Faucet            | Valley               |                                                      | Calcium-Bicarbonate              | 104               | < .03           | < .001         | 0.063         |              | < 1            | < .001         | 39             | 3.18            | < .002          | 261                          |
| 1189          | 1/14/2010   | Basement At Pressure Tank | Valley               |                                                      |                                  |                   | < .1            |                | 0.187         |              |                |                |                | 20.8            |                 | 330                          |
| 1190          | 9/1/2011    | Outside Faucet            | Upland               |                                                      |                                  |                   |                 |                |               |              |                |                |                |                 |                 | 275                          |
| 1191          | 9/1/2011    | Hydrant                   | Upland               |                                                      |                                  |                   |                 |                |               |              |                |                |                |                 |                 | 85                           |

Table S.8. Groundwater Quality Data for 1701 "Pre-Drill" Water Well Samples from Susquehanna County, Pennsylvania

| Water Well ID | Sample Date | Sampling Port             | Topographic Location | Gas Extraction Area (Within 1 km of Active Gas Well) | Groundwater Type (If Determined) | Alkalinity (mg/L) | Aluminum (mg/L) | Arsenic (mg/L) | Barium (mg/L) | Boron (mg/L) | Bromide (mg/L) | Cadmium (mg/L) | Calcium (mg/L) | Chloride (mg/L) | Chromium (mg/L) | Conductivity - Field (µs/cm) |
|---------------|-------------|---------------------------|----------------------|------------------------------------------------------|----------------------------------|-------------------|-----------------|----------------|---------------|--------------|----------------|----------------|----------------|-----------------|-----------------|------------------------------|
| 1192          | 8/2/2011    | Pressure Tank             | Upland               | Yes                                                  | Sodium-Bicarbonate               | 190               | 0.044           | 0.0043         | 0.036         |              | 0.25           | < .001         | 0.61           | 6.5             | 0.0021          | 0.417                        |
| 1193          | 1/17/2010   | Garage Sink               | Upland               |                                                      |                                  |                   | < .1            |                | 0.086         |              |                |                |                | 23.5            |                 | 352                          |
| 1194          | 8/10/2011   | Outside Faucet            | Valley               | Yes                                                  | Calcium-Bicarbonate              | 120               | 0.095           | 0.003          | 0.47          |              | < .2           | < .001         | 37             | < 1             | 0.006           | 254                          |
| 1195          | 8/10/2011   | Inside Faucet             | Upland               | Yes                                                  | Calcium-Sodium-Bicarbonate       | 130               | < .03           | < .001         | 1.3           |              | < .2           | < .001         | 27             | 1.1             | < .002          | 249                          |
| 1196          | 1/13/2010   | Kitchen Sink              | Upland               |                                                      |                                  |                   | < .1            |                | < .025        |              |                |                |                | 5.34            |                 |                              |
| 1197          | 2/3/2010    | Sink In Milkhouse Barn    | Upland               | Yes                                                  |                                  |                   | < .1            |                | 0.06          |              |                |                |                | 24.4            |                 |                              |
| 1198          | 8/15/2011   | Outside Faucet            | Upland               | Yes                                                  | Calcium-Bicarbonate              | 140               | < .03           | 0.0017         | 0.084         |              | < .2           | < .001         | 39             | 1.2             | < .002          | 222                          |
| 1199          | 1/12/2010   | Pressure Tank             | Upland               |                                                      |                                  |                   | < .1            |                | 0.115         |              |                |                |                | 5.53            |                 |                              |
| 1200          | 1/18/2010   | Kitchen Sink              | Upland               |                                                      |                                  |                   | < .1            |                | 0.073         |              |                |                |                | 32.1            |                 | 176.4                        |
| 1201          | 8/22/2011   | Barn Spigot               | Upland               |                                                      |                                  |                   |                 |                |               |              |                |                |                |                 |                 | 178                          |
| 1202          | 8/22/2011   | Kitchen Sink              | Valley               |                                                      |                                  |                   |                 |                |               |              |                |                |                |                 |                 | 170                          |
| 1203          | 8/22/2011   | Kitchen Sink              | Upland               |                                                      |                                  |                   |                 |                |               |              |                |                |                |                 |                 | 178                          |
| 1204          | 8/22/2011   | Kitchen Sink              | Valley               |                                                      |                                  |                   |                 |                |               |              |                |                |                |                 |                 | 224                          |
| 1205          | 8/22/2011   | Kitchen Sink              | Upland               |                                                      |                                  |                   |                 |                |               |              |                |                |                |                 |                 | 170                          |
| 1206          | 8/23/2011   | Outside Spigot            | Valley               |                                                      |                                  |                   |                 |                |               |              |                |                |                |                 |                 | 239                          |
| 1207          | 1/23/2010   | Basement At Pressure Tank | Upland               |                                                      |                                  |                   | < .1            |                | 0.208         |              |                |                |                | 25.9            |                 |                              |
| 1208          | 1/13/2010   |                           | Valley               |                                                      |                                  |                   | < .1            |                | 0.58          |              |                |                |                | 845             |                 |                              |
| 1209          | 6/23/2011   | Kitchen Sink              | Valley               | Yes                                                  | Calcium-Bicarbonate              | 130               | < .03           | 0.0018         | 0.13          |              | < .2           | < .001         | 28             | 2.8             | < .002          | 308                          |
| 1210          | 1/13/2010   | Kitchen Sink              | Upland               |                                                      |                                  |                   | < .1            |                | 0.12          |              |                |                |                | 4.54            |                 |                              |
| 1211          | 8/5/2011    | Inside Faucet             | Upland               | Yes                                                  | Calcium-Bicarbonate              | 100               | 0.037           | 0.0014         | 0.19          |              | < .2           | < .001         | 27             | 7.5             | < .002          | 0.184                        |
| 1212          | 8/12/2011   | Pressure Tank             | Valley               |                                                      | Calcium-Bicarbonate              | 100               | <0.03           | <0.001         | 0.13          |              | <0.2           | <0.001         | 23             | 8.3             | <0.002          |                              |
| 1213          | 12/6/2009   | Kitchen Sink              | Upland               |                                                      |                                  |                   | < .1            |                | 0.171         |              |                |                |                | 31.9            |                 |                              |
| 1214          | 8/12/2011   | Inside Faucet             | Upland               |                                                      | Calcium-Bicarbonate              | 78                | < .03           | < .001         | 0.1           |              | < .2           | < .001         | 25             | 1.5             | < .002          | 1251                         |
| 1215          | 8/21/2011   | Outside Faucet            | Upland               |                                                      | Calcium-Bicarbonate              | 120               | 2               | 0.012          | 0.34          |              | < .2           | < .001         | 38             | 4               | 0.0032          | 188                          |
| 1216          | 8/23/2011   | Inside Faucet             | Upland               |                                                      | Calcium-Sodium-Bicarbonate       | 100               | < .03           | 0.0024         | 0.097         |              | < .2           | < .001         | 20             | 2.5             | < .002          | 157                          |

Table S.8. Groundwater Quality Data for 1701 "Pre-Drill" Water Well Samples from Susquehanna County, Pennsylvania

| Water Well ID | Sample Date | Sampling Port                  | Topographic Location | Gas Extraction Area (Within 1 km of Active Gas Well) | Groundwater Type (If Determined) | Alkalinity (mg/L) | Aluminum (mg/L) | Arsenic (mg/L) | Barium (mg/L) | Boron (mg/L) | Bromide (mg/L) | Cadmium (mg/L) | Calcium (mg/L) | Chloride (mg/L) | Chromium (mg/L) | Conductivity - Field (µs/cm) |
|---------------|-------------|--------------------------------|----------------------|------------------------------------------------------|----------------------------------|-------------------|-----------------|----------------|---------------|--------------|----------------|----------------|----------------|-----------------|-----------------|------------------------------|
| 1217          | 8/23/2011   | Inside Faucet                  | Upland               | Yes                                                  | Calcium-Sodium-Bicarbonate       | 100               | < .03           | < .001         | 0.2           |              | < .2           | < .001         | 17             | 1.4             | < .002          | 142                          |
| 1218          | 8/24/2011   | Pressure Tank                  | Upland               | Yes                                                  | Calcium-Sodium-Bicarbonate       | 67                | 0.25            | 0.0073         | 0.12          |              | < .2           | < .001         | 13             | 3.9             | < .002          | 119                          |
| 1219          | 8/24/2011   | Inside Faucet                  | Valley               |                                                      | Calcium-Bicarbonate              | 120               | < .03           | < .001         | 0.052         |              | < .2           | < .001         | 33             | 1.4             | < .002          | 169                          |
| 1220          | 1/18/2010   | Basement Pressure Tank         | Upland               |                                                      |                                  |                   | < .1            |                | 0.172         |              |                |                |                | 89.8            |                 |                              |
| 1221          | 8/25/2011   | Inside Faucet                  | Upland               |                                                      | Calcium-Bicarbonate              | 110               | < .03           | 0.0011         | 0.086         |              | < .2           | < .001         | 30             | 1.7             | < .002          | 160                          |
| 1222          | 8/26/2011   | Well                           | Upland               | Yes                                                  | Calcium-Bicarbonate              | 130               | 0.68            | 0.007          | 0.048         |              | < .2           | < .001         | 25             | 2.7             | < .002          |                              |
| 1223          | 8/29/2011   | Kitchen Sink                   | Upland               |                                                      | Calcium-Bicarbonate              | 120               | < .03           | 0.0011         | 0.14          |              | < .2           | < .001         | 39             | 1.3             | < .002          | 259                          |
| 1224          | 1/11/2010   | Kitchen Sink                   | Upland               |                                                      |                                  |                   | < .1            |                | 0.318         |              |                |                |                | 34.8            |                 | 278                          |
| 1225          | 1/18/2010   | Pressure Tank In Basement      | Valley               | Yes                                                  |                                  |                   | < .1            |                | 0.103         |              |                |                |                | 35              |                 | 244                          |
| 1226          | 1/24/2010   | Pressure Tank                  | Upland               | Yes                                                  |                                  |                   | < .1            |                | 0.162         |              |                |                |                | 45.7            |                 |                              |
| 1227          | 8/30/2011   | Pressure Tank                  | Upland               |                                                      | Calcium-Bicarbonate              | 130               | 0.073           | < .001         | 0.19          |              | < .2           | < .001         | 31             | 1.1             | < .002          | 262                          |
| 1228          | 8/30/2011   | Outside Hose Bib               | Valley               |                                                      | Calcium-Bicarbonate              | 140               | < .03           | < .001         | 0.15          |              | < .2           | < .001         | 34             | 1.8             | < .002          | 222                          |
| 1229          | 8/10/2011   | Pressure Tank Before Treatment | Valley               |                                                      | Sodium-Bicarbonate-Chloride      | 130               | < .03           | < .001         | 0.87          |              | 0.67           | < .001         | 12             | 65              | < .002          | 373                          |
| 1230          | 1/10/2010   | Little House By Pond Spring    | Valley               |                                                      |                                  |                   | < .1            |                | 0.042         |              |                |                |                | 19.8            |                 |                              |
| 1231          | 1/10/2010   | Pressure Tank                  | Valley               |                                                      |                                  |                   | < .1            |                | 2.8           |              |                |                |                | 5.73            |                 |                              |
| 1232          | 1/16/2010   | Basement Pressure Tank         | Upland               |                                                      |                                  |                   | < .1            |                | 0.444         |              |                |                |                | 64.4            |                 |                              |
| 1233          | 7/19/2011   | Kitchen Sink                   | Upland               |                                                      |                                  |                   |                 |                |               |              |                |                |                |                 |                 | 347                          |
| 1234          | 8/24/2011   | Kitchen Sink                   | Valley               |                                                      |                                  |                   |                 |                |               |              |                |                |                |                 |                 | 205                          |
| 1235          | 8/24/2011   | Inside Faucet                  | Valley               |                                                      |                                  |                   |                 |                |               |              |                |                |                |                 |                 | 102                          |
| 1236          | 1/16/2010   | Basement At Pressure Tank      | Upland               |                                                      |                                  |                   | < .1            |                | 0.099         |              |                |                |                | 27.5            |                 |                              |
| 1237          | 1/16/2010   | Basement Pressure Tank         | Upland               |                                                      |                                  |                   | < .1            |                | 0.133         |              |                |                |                | 18.2            |                 | 261                          |

Table S.8. Groundwater Quality Data for 1701 "Pre-Drill" Water Well Samples from Susquehanna County, Pennsylvania

| Water Well ID | Sample Date | Sampling Port                | Topographic Location | Gas Extraction Area (Within 1 km of Active Gas Well) | Groundwater Type (If Determined) | Alkalinity (mg/L) | Aluminum (mg/L) | Arsenic (mg/L) | Barium (mg/L) | Boron (mg/L) | Bromide (mg/L) | Cadmium (mg/L) | Calcium (mg/L) | Chloride (mg/L) | Chromium (mg/L) | Conductivity - Field (µs/cm) |
|---------------|-------------|------------------------------|----------------------|------------------------------------------------------|----------------------------------|-------------------|-----------------|----------------|---------------|--------------|----------------|----------------|----------------|-----------------|-----------------|------------------------------|
| 1238          | 8/26/2011   | Kitchen Sink                 | Valley               |                                                      |                                  |                   |                 |                |               |              |                |                |                |                 |                 | 159                          |
| 1239          | 8/27/2011   | Kitchen Sink                 | Upland               |                                                      |                                  |                   |                 |                |               |              |                |                |                |                 |                 | 206                          |
| 1240          | 8/27/2011   | Kitchen Sink                 | Valley               |                                                      |                                  |                   |                 |                |               |              |                |                |                |                 |                 | 253                          |
| 1241          | 1/21/2010   | Kitchen Sink                 | Upland               |                                                      |                                  |                   | < .1            |                | 0.098         |              |                |                |                | 71.2            |                 | 285                          |
| 1242          | 8/27/2011   | Kitchen Faucet               | Valley               |                                                      |                                  |                   |                 |                |               |              |                |                |                |                 |                 |                              |
| 1243          | 1/23/2010   | Pressre Tank In Barn         | Upland               | Yes                                                  |                                  |                   | < .1            |                | 0.11          |              |                |                |                | 66.9            |                 |                              |
| 1244          | 9/1/2011    | Kitchen Sink                 | Valley               |                                                      |                                  |                   |                 |                |               |              |                |                |                |                 |                 | 145                          |
| 1245          | 1/23/2010   | Basement At Pressure Tank    | Upland               | Yes                                                  |                                  |                   | 0.1             |                | 0.136         |              |                |                |                | 115             |                 |                              |
| 1246          | 9/1/2011    | Well In Field                | Upland               |                                                      |                                  |                   |                 |                |               |              |                |                |                |                 |                 | 62                           |
| 1247          | 8/10/2011   | Kitchen Sink                 | Upland               |                                                      |                                  |                   |                 |                |               |              |                |                |                |                 |                 | 255                          |
| 1248          | 8/10/2011   | Kitchen Sink                 | Upland               |                                                      |                                  |                   |                 |                |               |              |                |                |                |                 |                 | 246                          |
| 1249          | 8/11/2011   | Pressure Tank                | Valley               |                                                      |                                  |                   |                 |                |               |              |                |                |                |                 |                 | 1011                         |
| 1250          | 1/14/2010   | Basement At Pressure Tank    | Upland               |                                                      |                                  |                   | < .1            |                | 0.09          |              |                |                |                | 3.58            |                 | 342                          |
| 1251          | 2/3/2010    | Holding Tank                 | Upland               |                                                      |                                  |                   | < .1            |                | 0.122         |              |                |                |                | 6.42            |                 | 84.9                         |
| 1252          | 8/18/2011   | Kitchen Sink                 | Valley               | Yes                                                  | Calcium-Bicarbonate              | 150               | < .03           | 0.0012         | 0.11          |              | < .2           | < .001         | 37             | 2.2             | < .002          | 270                          |
| 1253          | 1/31/2010   | Basement At Pressure Tank    | Upland               |                                                      |                                  |                   | < .1            |                | 0.051         |              |                |                |                | 7.99            |                 |                              |
| 1254          | 1/24/2010   | Kitchen Sink                 | Upland               |                                                      |                                  |                   | < .1            |                | 0.083         |              |                |                |                | 10.8            |                 | 298                          |
| 1255          | 1/21/2010   | Pressure Tank                | Valley               | Yes                                                  |                                  |                   | < .1            |                | 0.832         |              |                |                |                | 56              |                 |                              |
| 1256          | 2/12/2009   |                              | Upland               | Yes                                                  |                                  |                   | 0.077           |                | 0.08          |              |                |                |                | 33.2            |                 |                              |
| 1257          | 4/8/2009    |                              | Upland               |                                                      |                                  |                   | <0.05           |                | 0.099         |              |                |                |                | 52.4            |                 |                              |
| 1258          | 1/16/2010   | Basement Pressure Tank       | Upland               | Yes                                                  |                                  |                   | < .1            |                | 0.064         |              |                |                |                | 20.6            |                 |                              |
| 1259          | 1/24/2010   | Pressure Tank - Drilled Well | Valley               | Yes                                                  |                                  |                   | < .1            |                | 0.068         |              |                |                |                | 9.18            |                 |                              |
| 1260          | 1/31/2010   | Crawl Space At Pressure Tank | Valley               |                                                      |                                  |                   | < .1            |                | 0.072         |              |                |                |                | 7.26            |                 | 379                          |
| 1261          | 1/31/2010   | Pressure Tank                | Valley               |                                                      |                                  |                   | < .1            |                | 0.051         |              |                |                |                | 3.52            |                 |                              |

Table S.8. Groundwater Quality Data for 1701 "Pre-Drill" Water Well Samples from Susquehanna County, Pennsylvania

| Water Well ID | Sample Date | Sampling Port                     | Topographic Location | Gas Extraction Area (Within 1 km of Active Gas Well) | Groundwater Type (If Determined) | Alkalinity (mg/L) | Aluminum (mg/L) | Arsenic (mg/L) | Barium (mg/L) | Boron (mg/L) | Bromide (mg/L) | Cadmium (mg/L) | Calcium (mg/L) | Chloride (mg/L) | Chromium (mg/L) | Conductivity - Field (µs/cm) |
|---------------|-------------|-----------------------------------|----------------------|------------------------------------------------------|----------------------------------|-------------------|-----------------|----------------|---------------|--------------|----------------|----------------|----------------|-----------------|-----------------|------------------------------|
| 1262          | 1/24/2010   | Outside Spigot                    | Upland               |                                                      |                                  |                   | < .1            |                | 0.074         |              |                |                |                | 5.04            |                 |                              |
| 1263          | 1/24/2010   | Kitchen Sink                      | Upland               |                                                      |                                  |                   | < .1            |                | 0.085         |              |                |                |                | 5.81            |                 |                              |
| 1264          | 1/23/2010   | Pressure Tank In Basement         | Valley               | Yes                                                  |                                  |                   | < .1            |                | < .025        |              |                |                |                | 30.3            |                 | 75.5                         |
| 1265          | 1/18/2010   | Basement Pressure Tank            | Upland               |                                                      |                                  |                   | < .1            |                | 0.105         |              |                |                |                | 84.2            |                 | 260                          |
| 1266          | 1/10/2010   | Basement Pressure Tank            | Upland               |                                                      |                                  |                   | < .1            |                | < .025        |              |                |                |                | 4.12            |                 |                              |
| 1267          | 1/11/2010   | Pressure Tank                     | Upland               |                                                      |                                  |                   | < .1            |                | 0.118         |              |                |                |                | 2.39            |                 | 138.6                        |
| 1268          | 12/9/2009   | Basement At Pressure Tank         | Upland               | Yes                                                  |                                  |                   | < .1            |                | 0.147         |              |                |                |                | 8.37            |                 |                              |
| 1269          | 1/18/2010   | Pressure Tank                     | Upland               |                                                      |                                  |                   | < .1            |                | 0.093         |              |                |                |                | 32.9            |                 | 359                          |
| 1270          | 1/31/2010   |                                   | Upland               | Yes                                                  |                                  |                   | < .1            |                | 0.098         |              |                |                |                | 2.27            |                 |                              |
| 1271          | 8/7/2009    | Kitchen Sink                      | Valley               |                                                      |                                  |                   | < .01           |                | 0.055         |              |                |                |                | 4.32            |                 |                              |
| 1272          | 1/12/2010   | Kitchen Sink At Ashley Sarnosky'S | Upland               |                                                      |                                  |                   | < .1            |                | 0.088         |              |                |                |                | 4.55            |                 | 78.2                         |
| 1273          | 2/21/2010   | Kitchen Sink                      | Upland               |                                                      |                                  |                   | < .1            |                | 0.179         |              |                |                |                | 3.56            |                 | 205                          |
| 1274          | 8/6/2009    |                                   | Upland               | Yes                                                  |                                  |                   | < .1            |                | 0.084         |              |                |                |                | 14.7            |                 |                              |
| 1275          | 2/15/2010   | Pressure Tank                     | Upland               |                                                      |                                  |                   | < .1            |                | 1.42          |              |                |                |                | 14.7            |                 | 328                          |
| 1276          | 2/13/2010   | Basement At Pressure Tank         | Valley               |                                                      |                                  |                   | < .1            |                | 0.073         |              |                |                |                | 2.47            |                 |                              |
| 1277          | 2/27/2010   | Basement At Spigot                | Valley               |                                                      |                                  |                   | < .1            |                | 0.12          |              |                |                |                | 8.69            |                 |                              |
| 1278          | 2/18/2010   | Pressure Tank                     | Upland               | Yes                                                  |                                  |                   | < .1            |                | 0.118         |              |                |                |                | 19.2            |                 |                              |
| 1279          | 2/16/2010   | Kitchen Sink                      | Upland               |                                                      |                                  |                   | < .1            |                | 0.231         |              |                |                |                | 2.7             |                 | 215                          |
| 1280          | 2/18/2010   | Kitchen Sink                      | Upland               | Yes                                                  |                                  |                   | < .1            |                | 0.124         |              |                |                |                | 19.8            |                 |                              |
| 1281          | 2/18/2010   | Kitchen Sink                      | Upland               |                                                      |                                  |                   | < .1            |                | 0.171         |              |                |                |                | 13.4            |                 | 252                          |
| 1282          | 2/18/2010   | Kitchen Sink                      | Upland               |                                                      |                                  |                   | < .1            |                | 0.124         |              |                |                |                | 12.3            |                 |                              |



Table S.8. Groundwater Quality Data for 1701 "Pre-Drill" Water Well Samples from Susquehanna County, Pennsylvania

| Water Well ID | Sample Date | Sampling Port                          | Topographic Location | Gas Extraction Area (Within 1 km of Active Gas Well) | Groundwater Type (If Determined) | Alkalinity (mg/L) | Aluminum (mg/L) | Arsenic (mg/L) | Barium (mg/L) | Boron (mg/L) | Bromide (mg/L) | Cadmium (mg/L) | Calcium (mg/L) | Chloride (mg/L) | Chromium (mg/L) | Conductivity - Field (µs/cm) |
|---------------|-------------|----------------------------------------|----------------------|------------------------------------------------------|----------------------------------|-------------------|-----------------|----------------|---------------|--------------|----------------|----------------|----------------|-----------------|-----------------|------------------------------|
| 1283          | 2/22/2010   | Rental House Basement At Pressure Tank | Upland               |                                                      |                                  |                   | < .1            |                | 0.088         |              |                |                |                | 24.5            |                 |                              |
| 1284          | 2/16/2010   | Kitchen Sink                           | Upland               |                                                      |                                  |                   | < .1            |                | 0.131         |              |                |                |                | 30.3            |                 | 304                          |
| 1285          | 2/21/2010   | Kitchen Sink                           | Upland               |                                                      |                                  |                   | < .1            |                | 1.29          |              |                |                |                | 40.7            |                 |                              |
| 1286          | 2/18/2010   | Pressure Tank                          | Valley               |                                                      |                                  |                   | 8.91            |                | 0.495         |              |                |                |                | 11              |                 | 265                          |
| 1287          | 2/6/2010    | Basement At Pressure Tank              | Valley               |                                                      |                                  |                   | < .1            |                | 0.055         |              |                |                |                | 38.1            |                 | 271                          |
| 1288          | 2/13/2010   | Pressure Tank                          | Upland               |                                                      |                                  |                   | < .1            |                | 0.263         |              |                |                |                | 48.1            |                 |                              |
| 1289          | 2/1/2010    | Basement Sink                          | Valley               | Yes                                                  |                                  |                   | < .1            |                | 0.07          |              |                |                |                | 12.6            |                 |                              |
| 1290          | 2/21/2010   | Pressure Tank                          | Upland               |                                                      |                                  |                   | < .1            |                | 0.099         |              |                |                |                | 25.2            |                 | 202                          |
| 1291          | 2/21/2010   | Barn Well                              | Upland               |                                                      |                                  |                   | < .1            |                | 0.13          |              |                |                |                | 183             |                 | 625                          |
| 1292          | 2/16/2010   | Kitchen Sink                           | Upland               |                                                      |                                  |                   | < .1            |                | 0.176         |              |                |                |                | 5.55            |                 | 200                          |
| 1293          | 2/22/2010   | Hand Dug Well                          | Upland               |                                                      |                                  |                   | < .1            |                | 0.034         |              |                |                |                | 2.11            |                 | 180.5                        |
| 1294          | 2/16/2010   | Bathroom Sink                          | Upland               | Yes                                                  |                                  |                   | < .1            |                | 0.117         |              |                |                |                | 11.9            |                 |                              |
| 1295          | 2/16/2010   | Pressure Tank                          | Upland               |                                                      |                                  |                   | < .1            |                | 0.15          |              |                |                |                | 44.1            |                 |                              |
| 1296          | 2/7/2010    | Main House Pressure Tank               | Valley               |                                                      |                                  |                   | < .1            |                | 0.192         |              |                |                |                | 31              |                 |                              |
| 1297          | 2/7/2010    | Rental Property Pressure Tank          | Upland               |                                                      |                                  |                   | < .1            |                | 0.252         |              |                |                |                | 196             |                 |                              |
| 1298          | 2/13/2010   | Kitchen Sink                           | Upland               |                                                      |                                  |                   | < .1            |                | 0.9           |              |                |                |                | 15.2            |                 |                              |
| 1299          | 2/13/2010   | Well House                             | Upland               |                                                      |                                  |                   | < .1            |                | 0.079         |              |                |                |                | 53.8            |                 |                              |
| 1300          | 8/6/2009    |                                        | Valley               |                                                      |                                  |                   | 0.199           |                | 0.046         |              |                |                |                | 2.16            |                 |                              |
| 1301          | 2/7/2010    | Barn - Pump                            | Upland               |                                                      |                                  |                   | < .1            |                | 0.252         |              |                |                |                | 16.1            |                 | 251                          |
| 1302          | 2/7/2010    | Pressure Tank                          | Upland               |                                                      |                                  |                   | < .1            |                | 0.096         |              |                |                |                | 6.04            |                 | 246                          |
| 1303          | 2/7/2010    | Pressure Tank                          | Upland               |                                                      |                                  |                   | < .1            |                | 0.14          |              |                |                |                | 13.5            |                 |                              |
| 1304          | 2/6/2010    | Pressure Tank                          | Valley               |                                                      |                                  |                   | < .1            |                | 0.162         |              |                |                |                | 143             |                 |                              |
| 1305          | 2/6/2010    | Basement At Pressure Tank              | Valley               |                                                      |                                  |                   | < .1            |                | 0.134         |              |                |                |                | 18              |                 | 309                          |

Table S.8. Groundwater Quality Data for 1701 "Pre-Drill" Water Well Samples from Susquehanna County, Pennsylvania

| Water Well ID | Sample Date | Sampling Port                  | Topographic Location | Gas Extraction Area (Within 1 km of Active Gas Well) | Groundwater Type (If Determined) | Alkalinity (mg/L) | Aluminum (mg/L) | Arsenic (mg/L) | Barium (mg/L) | Boron (mg/L) | Bromide (mg/L) | Cadmium (mg/L) | Calcium (mg/L) | Chloride (mg/L) | Chromium (mg/L) | Conductivity - Field (µs/cm) |
|---------------|-------------|--------------------------------|----------------------|------------------------------------------------------|----------------------------------|-------------------|-----------------|----------------|---------------|--------------|----------------|----------------|----------------|-----------------|-----------------|------------------------------|
| 1306          | 2/6/2010    | Pressure Tank                  | Valley               |                                                      |                                  |                   | < .1            |                | 0.1           |              |                |                |                | 5.1             |                 | 204                          |
| 1307          | 2/15/2010   | Outside Hydrant                | Upland               | Yes                                                  |                                  |                   | < .1            |                | 0.162         |              |                |                |                | 17.2            |                 | 244                          |
| 1308          | 2/27/2010   | Hand Dug Well 1 Back Of House  | Valley               |                                                      |                                  |                   | < .1            |                | 0.037         |              |                |                |                | 29.9            |                 |                              |
| 1309          | 2/27/2010   | Hand Dug Well 2 Front Of House | Valley               |                                                      |                                  |                   | < .1            |                | 0.029         |              |                |                |                | 73.5            |                 |                              |
| 1310          | 2/7/2010    | Outside Faucet                 | Valley               |                                                      |                                  |                   | < .1            |                | 2.57          |              |                |                |                | 69.9            |                 | 38.3                         |
| 1311          | 2/6/2010    | Basement At Pressure Tank      | Valley               |                                                      |                                  |                   | < .1            |                | 0.184         |              |                |                |                | 10.2            |                 |                              |
| 1312          | 2/21/2010   | Kitchen Sink                   | Valley               |                                                      |                                  |                   | < .1            |                | 0.314         |              |                |                |                | 2.91            |                 |                              |
| 1313          | 8/6/2009    |                                | Valley               |                                                      |                                  |                   | < .1            |                | 0.089         |              |                |                |                | 2.89            |                 |                              |
| 1314          | 2/22/2010   | Milkhouse Sink                 | Upland               |                                                      |                                  |                   | < .1            |                | 0.098         |              |                |                |                | 3.72            |                 | 294                          |
| 1315          | 2/28/2010   | Pressure Tank                  | Valley               | Yes                                                  |                                  |                   | < .1            |                | 0.043         |              |                |                |                | 3.77            |                 |                              |
| 1316          | 2/13/2010   | Basement Men'S Room Sink       | Upland               |                                                      |                                  |                   | < .1            |                | 0.511         |              |                |                |                | 228             |                 |                              |
| 1317          | 2/28/2010   | Outside Spigot                 | Valley               |                                                      |                                  |                   | < .1            |                | 0.564         |              |                |                |                | 29.7            |                 | 276                          |
| 1318          | 2/28/2010   | Kitchen Sink                   | Upland               |                                                      |                                  |                   | < .1            |                | 0.052         |              |                |                |                | 5.35            |                 |                              |
| 1319          | 2/27/2010   | Basement Pressure Tank         | Valley               |                                                      |                                  |                   | < .1            |                | < .025        |              |                |                |                | 3.12            |                 |                              |
| 1320          | 3/16/2010   | Kitchen Sink                   | Valley               | Yes                                                  |                                  |                   | < .1            |                | 0.033         |              |                |                |                | < 2             |                 | 45.3                         |
| 1321          | 3/11/2010   | Kitchen Sink                   | Upland               | Yes                                                  |                                  |                   | < .1            |                | 0.079         |              |                |                |                | 2.73            |                 | 200                          |
| 1322          | 3/18/2010   | Kitchen Sink                   | Upland               |                                                      |                                  |                   | < .1            | < .003         | 0.36          | 0.133        |                |                |                | 187             |                 | 718                          |
| 1323          | 8/11/2011   | Kitchen Sink                   | Upland               | Yes                                                  |                                  |                   |                 |                |               |              |                |                |                |                 |                 | 123.1                        |
| 1324          | 8/11/2011   | Kitchen Sink                   | Valley               |                                                      |                                  |                   |                 |                |               |              |                |                |                |                 |                 | 278                          |
| 1325          | 8/11/2011   | Kitchen Sink                   | Upland               |                                                      |                                  |                   |                 |                |               |              |                |                |                |                 |                 | 95.2                         |
| 1326          | 8/11/2011   | Kitchen Sink                   | Upland               |                                                      |                                  |                   |                 |                |               |              |                |                |                |                 |                 | 168.8                        |
| 1327          | 8/11/2011   | Kitchen Sink                   | Upland               |                                                      |                                  |                   |                 |                |               |              |                |                |                |                 |                 | 203                          |
| 1328          | 8/11/2011   | Kitchen Sink                   | Upland               |                                                      |                                  |                   |                 |                |               |              |                |                |                |                 |                 | 198.4                        |

Table S.8. Groundwater Quality Data for 1701 "Pre-Drill" Water Well Samples from Susquehanna County, Pennsylvania

| Water Well ID | Sample Date | Sampling Port  | Topographic Location | Gas Extraction Area (Within 1 km of Active Gas Well) | Groundwater Type (If Determined) | Alkalinity (mg/L) | Aluminum (mg/L) | Arsenic (mg/L) | Barium (mg/L) | Boron (mg/L) | Bromide (mg/L) | Cadmium (mg/L) | Calcium (mg/L) | Chloride (mg/L) | Chromium (mg/L) | Conductivity - Field (µs/cm) |
|---------------|-------------|----------------|----------------------|------------------------------------------------------|----------------------------------|-------------------|-----------------|----------------|---------------|--------------|----------------|----------------|----------------|-----------------|-----------------|------------------------------|
| 1329          | 8/11/2011   | Kitchen Sink   | Upland               |                                                      |                                  |                   |                 |                |               |              |                |                |                |                 |                 | 138.6                        |
| 1330          | 8/6/2009    |                | Valley               |                                                      |                                  |                   | < .1            |                | 0.126         |              |                |                |                | 65.2            |                 |                              |
| 1331          | 8/11/2011   | Kitchen Sink   | Upland               |                                                      |                                  |                   |                 |                |               |              |                |                |                |                 |                 | 156.7                        |
| 1332          | 8/11/2011   | Kitchen Sink   | Valley               |                                                      |                                  |                   |                 |                |               |              |                |                |                |                 |                 | 264                          |
| 1333          | 8/11/2011   | Kitchen Sink   | Upland               |                                                      |                                  |                   |                 |                |               |              |                |                |                |                 |                 | 461                          |
| 1334          | 8/11/2011   | Kitchen Sink   | Valley               |                                                      |                                  |                   |                 |                |               |              |                |                |                |                 |                 |                              |
| 1335          | 8/12/2011   | Kitchen Sink   | Valley               |                                                      |                                  |                   |                 |                |               |              |                |                |                |                 |                 | 330                          |
| 1336          | 8/12/2011   | Kitchen Sink   | Valley               |                                                      |                                  |                   |                 |                |               |              |                |                |                |                 |                 | 166.3                        |
| 1337          | 8/12/2011   | Kitchen Sink   | Valley               |                                                      |                                  |                   |                 |                |               |              |                |                |                |                 |                 | 174.8                        |
| 1338          | 8/12/2011   | Kitchen Sink   | Valley               |                                                      |                                  |                   |                 |                |               |              |                |                |                |                 |                 | 212                          |
| 1339          | 8/12/2011   | Kitchen Sink   | Valley               |                                                      |                                  |                   |                 |                |               |              |                |                |                |                 |                 | 187.1                        |
| 1340          | 5/13/2010   |                | Upland               | Yes                                                  |                                  |                   |                 |                |               |              |                |                |                | 5.47            |                 |                              |
| 1341          | 8/12/2011   | Pressure Tank  | Upland               |                                                      |                                  |                   |                 |                |               |              |                |                |                |                 |                 | 123.9                        |
| 1342          | 8/12/2011   | Kitchen Sink   | Valley               |                                                      |                                  |                   |                 |                |               |              |                |                |                |                 |                 | 248                          |
| 1343          | 8/12/2011   | Bathroom Sink  | Valley               |                                                      |                                  |                   |                 |                |               |              |                |                |                |                 |                 | 183.1                        |
| 1344          | 8/14/2011   | Outside Spigot | Valley               |                                                      |                                  |                   |                 |                |               |              |                |                |                |                 |                 | 224                          |
| 1345          | 8/14/2011   | Kitchen Sink   | Upland               |                                                      |                                  |                   |                 |                |               |              |                |                |                |                 |                 | 85.4                         |
| 1346          | 5/13/2010   |                | Upland               |                                                      |                                  |                   | < .1            | < .003         | 0.423         | < .1         |                |                |                | 2.76            |                 |                              |
| 1347          | 8/14/2011   | Kitchen Sink   | Valley               |                                                      |                                  |                   |                 |                |               |              |                |                |                |                 |                 | 231                          |
| 1348          | 8/14/2011   | Kitchen Sink   | Upland               |                                                      |                                  |                   |                 |                |               |              |                |                |                |                 |                 | 154.1                        |
| 1349          | 8/14/2011   | Kitchen Sink   | Upland               |                                                      |                                  |                   |                 |                |               |              |                |                |                |                 |                 | 239                          |
| 1350          | 8/14/2011   | Pressure Tank  | Upland               |                                                      |                                  |                   |                 |                |               |              |                |                |                |                 |                 | 260                          |
| 1351          | 8/14/2011   | Kitchen Sink   | Upland               |                                                      |                                  |                   |                 |                |               |              |                |                |                |                 |                 | 302                          |
| 1352          | 8/15/2011   | Kitchen Sink   | Upland               |                                                      |                                  |                   |                 |                |               |              |                |                |                |                 |                 | 205                          |
| 1353          | 8/15/2011   | Barn Sink      | Upland               |                                                      |                                  |                   |                 |                |               |              |                |                |                |                 |                 | 232                          |
| 1354          | 8/15/2011   | Kitchen Sink   | Valley               |                                                      |                                  |                   |                 |                |               |              |                |                |                |                 |                 | 299                          |
| 1355          | 8/15/2011   | Kitchen Sink   | Valley               |                                                      |                                  |                   |                 |                |               |              |                |                |                |                 |                 | 267                          |
| 1356          | 8/15/2011   | Sink In Barn   | Valley               |                                                      |                                  |                   |                 |                |               |              |                |                |                |                 |                 | 306                          |

Table S.8. Groundwater Quality Data for 1701 "Pre-Drill" Water Well Samples from Susquehanna County, Pennsylvania

| Water Well ID | Sample Date | Sampling Port             | Topographic Location | Gas Extraction Area (Within 1 km of Active Gas Well) | Groundwater Type (If Determined) | Alkalinity (mg/L) | Aluminum (mg/L) | Arsenic (mg/L) | Barium (mg/L) | Boron (mg/L) | Bromide (mg/L) | Cadmium (mg/L) | Calcium (mg/L) | Chloride (mg/L) | Chromium (mg/L) | Conductivity - Field (µs/cm) |
|---------------|-------------|---------------------------|----------------------|------------------------------------------------------|----------------------------------|-------------------|-----------------|----------------|---------------|--------------|----------------|----------------|----------------|-----------------|-----------------|------------------------------|
| 1357          | 8/16/2011   | Kitchen Sink              | Upland               |                                                      |                                  |                   |                 |                |               |              |                |                |                |                 |                 | 185.1                        |
| 1358          | 8/16/2011   | Outside Spigot            | Upland               |                                                      |                                  |                   |                 |                |               |              |                |                |                |                 |                 | 212                          |
| 1359          | 8/16/2011   | Kitchen Sink              | Upland               |                                                      |                                  |                   |                 |                |               |              |                |                |                |                 |                 | 200                          |
| 1360          | 8/16/2011   | Kitchen Sink              | Upland               |                                                      |                                  |                   |                 |                |               |              |                |                |                |                 |                 | 205                          |
| 1361          | 8/16/2011   | Kitchen Sink              | Valley               |                                                      |                                  |                   |                 |                |               |              |                |                |                |                 |                 | 182.5                        |
| 1362          | 8/16/2011   | Spigot On Side Of House   | Upland               |                                                      |                                  |                   |                 |                |               |              |                |                |                |                 |                 | 231                          |
| 1363          | 8/17/2011   | Kitchen Sink              | Upland               |                                                      |                                  |                   |                 |                |               |              |                |                |                |                 |                 | 227                          |
| 1364          | 8/17/2011   | Outside Spigot            | Valley               |                                                      |                                  |                   |                 |                |               |              |                |                |                |                 |                 | 168.2                        |
| 1365          | 8/17/2011   | Kitchen Sink              | Upland               |                                                      |                                  |                   |                 |                |               |              |                |                |                |                 |                 | 212                          |
| 1366          | 8/17/2011   | Kitchen Sink              | Valley               |                                                      |                                  |                   |                 |                |               |              |                |                |                |                 |                 | 248                          |
| 1367          | 8/17/2011   | Kitchen Sink              | Valley               |                                                      |                                  |                   |                 |                |               |              |                |                |                |                 |                 | 302                          |
| 1368          | 8/17/2011   | Kitchen Sink              | Valley               |                                                      |                                  |                   |                 |                |               |              |                |                |                |                 |                 | 258                          |
| 1369          | 8/18/2011   | Kitchen Sink              | Upland               |                                                      |                                  |                   |                 |                |               |              |                |                |                |                 |                 | 142                          |
| 1370          | 2/8/2010    | Basement At Pressure Tank | Upland               | Yes                                                  |                                  |                   | < .1            |                | 0.134         |              |                |                |                | 36.6            |                 |                              |
| 1371          | 8/18/2011   | Kitchen Sink              | Valley               |                                                      |                                  |                   |                 |                |               |              |                |                |                |                 |                 | 170                          |
| 1372          | 8/18/2011   | Kitchen Sink              | Valley               |                                                      |                                  |                   |                 |                |               |              |                |                |                |                 |                 | 162                          |
| 1373          | 8/18/2011   | Kitchen Sink              | Valley               |                                                      |                                  |                   |                 |                |               |              |                |                |                |                 |                 | 246                          |
| 1374          | 8/18/2011   | Barn Sink                 | Upland               |                                                      |                                  |                   |                 |                |               |              |                |                |                |                 |                 | 147                          |
| 1375          | 8/18/2011   | Barn Sink                 | Valley               |                                                      |                                  |                   |                 |                |               |              |                |                |                |                 |                 | 150                          |
| 1376          | 3/8/2010    | Kitchen Sink              | Valley               | Yes                                                  |                                  |                   | < .1            |                | 0.148         |              |                |                |                | 6.34            |                 | 294                          |
| 1377          | 8/18/2011   | Kitchen Sink              | Upland               |                                                      |                                  |                   |                 |                |               |              |                |                |                |                 |                 | 155                          |
| 1378          | 8/19/2011   | Kitchen Sink              | Upland               |                                                      |                                  |                   |                 |                |               |              |                |                |                |                 |                 | 157                          |
| 1379          | 8/19/2011   | Kitchen Sink              | Upland               |                                                      |                                  |                   |                 |                |               |              |                |                |                |                 |                 | 176                          |
| 1380          | 8/19/2011   | Kitchen Sink              | Upland               |                                                      |                                  |                   |                 |                |               |              |                |                |                |                 |                 |                              |
| 1381          | 8/17/2009   |                           | Valley               |                                                      |                                  |                   | < .1            |                | 0.269         |              |                |                |                | 13.3            |                 |                              |
| 1382          | 8/19/2011   |                           | Valley               |                                                      |                                  |                   |                 |                |               |              |                |                |                |                 |                 | 125                          |

Table S.8. Groundwater Quality Data for 1701 "Pre-Drill" Water Well Samples from Susquehanna County, Pennsylvania

| Water Well ID | Sample Date | Sampling Port               | Topographic Location | Gas Extraction Area (Within 1 km of Active Gas Well) | Groundwater Type (If Determined) | Alkalinity (mg/L) | Aluminum (mg/L) | Arsenic (mg/L) | Barium (mg/L) | Boron (mg/L) | Bromide (mg/L) | Cadmium (mg/L) | Calcium (mg/L) | Chloride (mg/L) | Chromium (mg/L) | Conductivity - Field (µs/cm) |
|---------------|-------------|-----------------------------|----------------------|------------------------------------------------------|----------------------------------|-------------------|-----------------|----------------|---------------|--------------|----------------|----------------|----------------|-----------------|-----------------|------------------------------|
| 1383          | 8/19/2011   | Kitchen Sink                | Valley               |                                                      |                                  |                   |                 |                |               |              |                |                |                |                 |                 | 104                          |
| 1384          | 8/22/2011   | Kitchen Sink                | Upland               |                                                      |                                  |                   |                 |                |               |              |                |                |                |                 |                 | 158                          |
| 1385          | 8/22/2011   | Kitchen Sink                | Upland               |                                                      |                                  |                   |                 |                |               |              |                |                |                |                 |                 | 103                          |
| 1386          | 8/23/2011   | Outside Spigot              | Upland               |                                                      |                                  |                   |                 |                |               |              |                |                |                |                 |                 | 227                          |
| 1387          | 8/23/2011   | Barn Outside Spigot         | Upland               |                                                      |                                  |                   |                 |                |               |              |                |                |                |                 |                 | 164.9                        |
| 1388          | 8/23/2011   | Outside Spigot              | Upland               |                                                      |                                  |                   |                 |                |               |              |                |                |                |                 |                 | 213                          |
| 1389          | 3/4/2010    | Post Office - Bathroom Sink | Upland               | Yes                                                  |                                  |                   | < .1            |                | 0.217         |              |                |                |                | 67.4            |                 | 468                          |
| 1390          | 8/23/2011   | Outside Spigot              | Valley               |                                                      |                                  |                   |                 |                |               |              |                |                |                |                 |                 | 163.4                        |
| 1391          | 8/23/2011   | Outside Spigot              | Upland               |                                                      |                                  |                   |                 |                |               |              |                |                |                |                 |                 | 310                          |
| 1392          | 8/24/2011   | Kitchen Sink                | Upland               |                                                      |                                  |                   |                 |                |               |              |                |                |                |                 |                 | 107.1                        |
| 1393          | 8/24/2011   | Kitchen Sink                | Upland               |                                                      |                                  |                   |                 |                |               |              |                |                |                |                 |                 | 225                          |
| 1394          | 8/24/2011   | Kitchen Sink                | Valley               |                                                      |                                  |                   |                 |                |               |              |                |                |                |                 |                 | 155                          |
| 1395          | 8/24/2011   | Kitchen Sink                | Upland               |                                                      |                                  |                   |                 |                |               |              |                |                |                |                 |                 | 107                          |
| 1396          | 8/24/2011   | Kitchen Sink                | Valley               |                                                      |                                  |                   |                 |                |               |              |                |                |                |                 |                 | 129                          |
| 1397          | 8/24/2011   | Inside Faucet               | Upland               |                                                      |                                  |                   |                 |                |               |              |                |                |                |                 |                 | 85                           |
| 1398          | 8/24/2011   | Kitchen Sink                | Upland               |                                                      |                                  |                   |                 |                |               |              |                |                |                |                 |                 | 212                          |
| 1399          | 8/24/2011   | Kitchen Sink                | Valley               |                                                      |                                  |                   |                 |                |               |              |                |                |                |                 |                 | 175.4                        |
| 1400          | 3/8/2010    | Basement At Pressure Tank   | Upland               |                                                      |                                  |                   | < .1            |                | 0.033         |              |                |                |                | < 2             |                 |                              |
| 1401          | 8/24/2011   | Kitchen Sink                | Upland               |                                                      |                                  |                   |                 |                |               |              |                |                |                |                 |                 |                              |
| 1402          | 8/24/2011   | Kitchen Sink                | Upland               |                                                      |                                  |                   |                 |                |               |              |                |                |                |                 |                 | 277                          |
| 1403          | 8/24/2011   | Kitchen Sink                | Upland               |                                                      |                                  |                   |                 |                |               |              |                |                |                |                 |                 | 185.5                        |
| 1404          | 8/24/2011   | Bathroom Sink               | Valley               |                                                      |                                  |                   |                 |                |               |              |                |                |                |                 |                 | 145                          |
| 1405          | 8/24/2011   | Kitchen Sink                | Valley               |                                                      |                                  |                   |                 |                |               |              |                |                |                |                 |                 | 137                          |
| 1406          | 8/25/2011   | Kitchen Sink                | Valley               |                                                      |                                  |                   |                 |                |               |              |                |                |                |                 |                 | 121                          |

Table S.8. Groundwater Quality Data for 1701 "Pre-Drill" Water Well Samples from Susquehanna County, Pennsylvania

| Water Well ID | Sample Date | Sampling Port             | Topographic Location | Gas Extraction Area (Within 1 km of Active Gas Well) | Groundwater Type (If Determined) | Alkalinity (mg/L) | Aluminum (mg/L) | Arsenic (mg/L) | Barium (mg/L) | Boron (mg/L) | Bromide (mg/L) | Cadmium (mg/L) | Calcium (mg/L) | Chloride (mg/L) | Chromium (mg/L) | Conductivity - Field (µs/cm) |
|---------------|-------------|---------------------------|----------------------|------------------------------------------------------|----------------------------------|-------------------|-----------------|----------------|---------------|--------------|----------------|----------------|----------------|-----------------|-----------------|------------------------------|
| 1407          | 8/25/2011   | Kitchen Sink              | Valley               |                                                      |                                  |                   |                 |                |               |              |                |                |                |                 |                 | 101                          |
| 1408          | 8/25/2011   | Kitchen Sink              | Valley               |                                                      |                                  |                   |                 |                |               |              |                |                |                |                 |                 | 155                          |
| 1409          | 8/25/2011   | Downstairs Sink           | Valley               |                                                      |                                  |                   |                 |                |               |              |                |                |                |                 |                 | 177                          |
| 1410          | 8/25/2011   | Kitchen Sink              | Upland               |                                                      |                                  |                   |                 |                |               |              |                |                |                |                 |                 | 139                          |
| 1411          | 8/25/2011   | Kitchen Sink              | Valley               |                                                      |                                  |                   |                 |                |               |              |                |                |                |                 |                 | 253                          |
| 1412          | 8/25/2011   | Kitchen Sink              | Valley               |                                                      |                                  |                   |                 |                |               |              |                |                |                |                 |                 | 231                          |
| 1413          | 8/26/2011   | Kitchen Sink              | Upland               |                                                      |                                  |                   |                 |                |               |              |                |                |                |                 |                 | 125                          |
| 1414          | 8/26/2011   | Outside Spigot            | Valley               |                                                      |                                  |                   |                 |                |               |              |                |                |                |                 |                 | 99                           |
| 1415          | 8/26/2011   | Kitchen Sink              | Upland               |                                                      |                                  |                   |                 |                |               |              |                |                |                |                 |                 | 133                          |
| 1416          | 8/26/2011   | Kitchen Sink              | Valley               |                                                      |                                  |                   |                 |                |               |              |                |                |                |                 |                 | 139                          |
| 1417          | 8/26/2011   | Kitchen Sink              | Upland               |                                                      |                                  |                   |                 |                |               |              |                |                |                |                 |                 | 127                          |
| 1418          | 8/26/2011   | Kitchen Sink              | Upland               |                                                      |                                  |                   |                 |                |               |              |                |                |                |                 |                 | 138                          |
| 1419          | 8/26/2011   | Barn Sink                 | Valley               |                                                      |                                  |                   |                 |                |               |              |                |                |                |                 |                 | 333                          |
| 1420          | 8/27/2011   | Kitchen Sink              | Upland               |                                                      |                                  |                   |                 |                |               |              |                |                |                |                 |                 | 219                          |
| 1421          | 8/27/2011   | Kitchen Sink              | Upland               |                                                      |                                  |                   |                 |                |               |              |                |                |                |                 |                 | 128.4                        |
| 1422          | 10/30/2009  | Basement At Pressure Tank | Upland               | Yes                                                  |                                  |                   | < .1            |                | 0.072         |              |                |                |                | 7.64            |                 | 160.7                        |
| 1423          | 8/31/2011   | Kitchen Sink              | Upland               |                                                      |                                  |                   |                 |                |               |              |                |                |                |                 |                 | 323                          |
| 1424          | 8/31/2011   | Kitchen Sink              | Valley               |                                                      |                                  |                   |                 |                |               |              |                |                |                |                 |                 |                              |
| 1425          | 8/31/2011   | Spigot On Well            | Valley               |                                                      |                                  |                   |                 |                |               |              |                |                |                |                 |                 | 236                          |
| 1426          | 8/31/2011   | Kitchen Sink              | Upland               |                                                      |                                  |                   |                 |                |               |              |                |                |                |                 |                 | 115.3                        |
| 1427          | 9/1/2011    | Kitchen Sink              | Valley               |                                                      |                                  |                   |                 |                |               |              |                |                |                |                 |                 | 126                          |
| 1428          | 9/1/2011    | Spigot Side Of House      | Valley               |                                                      |                                  |                   |                 |                |               |              |                |                |                |                 |                 | 121                          |
| 1429          | 9/2/2011    | Kitchen Sink              | Upland               |                                                      |                                  |                   |                 |                |               |              |                |                |                |                 |                 | 148                          |
| 1430          | 9/2/2011    | Spigot On Well            | Valley               |                                                      |                                  |                   |                 |                |               |              |                |                |                |                 |                 | 157                          |
| 1431          | 3/7/2010    | Kitchen Sink              | Valley               |                                                      |                                  |                   | < .1            |                | < .025        |              |                |                |                | < 2             |                 | 434                          |

Table S.8. Groundwater Quality Data for 1701 "Pre-Drill" Water Well Samples from Susquehanna County, Pennsylvania

| Water Well ID | Sample Date | Sampling Port             | Topographic Location | Gas Extraction Area (Within 1 km of Active Gas Well) | Groundwater Type (If Determined) | Alkalinity (mg/L) | Aluminum (mg/L) | Arsenic (mg/L) | Barium (mg/L) | Boron (mg/L) | Bromide (mg/L) | Cadmium (mg/L) | Calcium (mg/L) | Chloride (mg/L) | Chromium (mg/L) | Conductivity - Field (µs/cm) |
|---------------|-------------|---------------------------|----------------------|------------------------------------------------------|----------------------------------|-------------------|-----------------|----------------|---------------|--------------|----------------|----------------|----------------|-----------------|-----------------|------------------------------|
| 1432          | 9/2/2011    | Kitchen Sink              | Upland               |                                                      |                                  |                   |                 |                |               |              |                |                |                |                 |                 | 116                          |
| 1433          | 9/2/2011    | Kitchen Sink              | Valley               |                                                      |                                  |                   |                 |                |               |              |                |                |                |                 |                 | 107                          |
| 1434          | 9/2/2011    | Bathroom Sink             | Upland               |                                                      |                                  |                   |                 |                |               |              |                |                |                |                 |                 | 68                           |
| 1435          | 9/2/2011    | Kitchen Sink              | Upland               |                                                      |                                  |                   |                 |                |               |              |                |                |                |                 |                 | 93                           |
| 1436          | 9/2/2011    | Well Spigot               | Upland               |                                                      |                                  |                   |                 |                |               |              |                |                |                |                 |                 | 64                           |
| 1437          | 3/8/2010    | Basement At Pressure Tank | Upland               |                                                      |                                  |                   | < .1            |                | 0.025         |              |                |                |                | < 2             |                 |                              |
| 1438          | 9/2/2011    | Kitchen Sink              | Valley               |                                                      |                                  |                   |                 |                |               |              |                |                |                |                 |                 | 153                          |
| 1439          | 9/7/2011    | Kitchen Sink              | Upland               |                                                      |                                  |                   |                 |                |               |              |                |                |                |                 |                 | 135                          |
| 1440          | 9/7/2011    | Kitchen Sink              | Upland               |                                                      |                                  |                   |                 |                |               |              |                |                |                |                 |                 | 232                          |
| 1441          | 9/7/2011    | Kitchen Sink              | Valley               |                                                      |                                  |                   |                 |                |               |              |                |                |                |                 |                 | 484                          |
| 1442          | 9/7/2011    | Kitchen Sink              | Upland               |                                                      |                                  |                   |                 |                |               |              |                |                |                |                 |                 | 173.3                        |
| 1443          | 9/8/2011    | Kitchen Faucet            | Valley               |                                                      |                                  |                   |                 |                |               |              |                |                |                |                 |                 |                              |
| 1444          | 9/8/2011    | Kitchen Sink              | Valley               |                                                      |                                  |                   |                 |                |               |              |                |                |                |                 |                 | 124                          |
| 1445          | 9/8/2011    | Outside Spigot            | Upland               |                                                      |                                  |                   |                 |                |               |              |                |                |                |                 |                 | 120                          |
| 1446          | 9/8/2011    | Kitchen Sink              | Valley               |                                                      |                                  |                   |                 |                |               |              |                |                |                |                 |                 | 142                          |
| 1447          | 9/8/2011    | Kitchen Sink              | Upland               |                                                      |                                  |                   |                 |                |               |              |                |                |                |                 |                 | 114                          |
| 1448          | 9/8/2011    | Kitchen Sink              | Upland               |                                                      |                                  |                   |                 |                |               |              |                |                |                |                 |                 | 58                           |
| 1449          | 9/8/2011    | Kitchen Sink              | Upland               |                                                      |                                  |                   |                 |                |               |              |                |                |                |                 |                 | 189                          |
| 1450          | 3/8/2010    | Basement Pressure Tank    | Upland               |                                                      |                                  |                   | < .1            |                | 0.201         |              |                |                |                | 10.3            |                 | 286                          |
| 1451          | 8/20/2009   |                           | Upland               | Yes                                                  |                                  |                   | < .1            |                | 0.147         |              |                |                |                | 6.77            |                 |                              |
| 1452          | 3/7/2010    | Pressure Tank             | Upland               |                                                      |                                  |                   | < .1            |                | 0.083         |              |                |                |                | < 2             |                 |                              |
| 1453          | 3/7/2010    | Kitchen Sink              | Upland               |                                                      |                                  |                   | < .1            |                | 0.064         |              |                |                |                | 4.37            |                 |                              |
| 1454          | 3/11/2010   | Pressure Tank             | Valley               |                                                      |                                  |                   | < .1            |                | 0.168         |              |                |                |                | 11.8            |                 | 268                          |
| 1455          | 5/1/2010    | Kitchen Sink              | Valley               |                                                      |                                  |                   | < .1            | < .003         | 0.182         | < .1         |                |                |                | 2.61            |                 |                              |
| 1456          | 5/1/2010    | Kitchen Sink              | Valley               |                                                      |                                  |                   | < .1            | < .003         | 0.034         | < .1         |                |                |                | 12              |                 | 93.2                         |

Table S.8. Groundwater Quality Data for 1701 "Pre-Drill" Water Well Samples from Susquehanna County, Pennsylvania

| Water Well ID | Sample Date | Sampling Port                  | Topographic Location | Gas Extraction Area (Within 1 km of Active Gas Well) | Groundwater Type (If Determined) | Alkalinity (mg/L) | Aluminum (mg/L) | Arsenic (mg/L) | Barium (mg/L) | Boron (mg/L) | Bromide (mg/L) | Cadmium (mg/L) | Calcium (mg/L) | Chloride (mg/L) | Chromium (mg/L) | Conductivity - Field (µs/cm) |
|---------------|-------------|--------------------------------|----------------------|------------------------------------------------------|----------------------------------|-------------------|-----------------|----------------|---------------|--------------|----------------|----------------|----------------|-----------------|-----------------|------------------------------|
| 1457          | 5/3/2010    | Outside Spigot On Garage       | Upland               | Yes                                                  |                                  |                   | < .1            | < .003         | < .025        | < .1         |                |                |                | 5.2             |                 | 76.5                         |
| 1458          | 5/6/2010    | Kitchen Sink                   | Upland               |                                                      |                                  |                   | < .1            | < .003         | 0.045         | < .1         |                |                |                | 2.86            |                 | 195.3                        |
| 1459          | 5/6/2010    | Kitchen Sink                   | Valley               | Yes                                                  |                                  |                   | < .1            | < .003         | 1.6           | 0.137        |                |                |                | 140             |                 | 682                          |
| 1460          | 5/7/2010    | Kitchen Sink                   | Valley               | Yes                                                  |                                  |                   | < .1            | 0.004          | 0.268         | 0.13         |                |                |                | 11.8            |                 | 254                          |
| 1461          | 8/24/2011   | Kitchen Sink                   | Valley               |                                                      | Calcium-Bicarbonate              | 100               | < .03           | < .001         | 0.071         |              | < .2           | < .001         | 30             | 2.3             | < .002          | 180                          |
| 1462          | 8/24/2011   | Inside Faucet                  | Valley               |                                                      | Calcium-Bicarbonate              | 130               | < .03           | < .001         | 0.15          |              | < .2           | < .001         | 30             | 2.9             | < .002          | 191                          |
| 1463          | 8/24/2011   | Pressure Tank Hose Bib         | Upland               |                                                      | Calcium-Sodium-Bicarbonate       | 78                | < .03           | < .001         | 0.073         |              | < .2           | < .001         | 19             | 3.7             | < .002          | 130                          |
| 1464          | 5/7/2010    | Outside Spigot                 | Upland               |                                                      |                                  |                   | < .1            | < .003         | 0.137         | < .1         |                |                |                | 5.45            |                 |                              |
| 1465          | 8/30/2011   | Inside Faucet                  | Valley               |                                                      | Calcium-Bicarbonate              | 180               | 0.17            | 0.0016         | 0.15          |              | < .2           | < .001         | 43             | < 1             | < .002          | 233                          |
| 1466          | 5/13/2010   | Kitchen Sink                   | Valley               |                                                      |                                  |                   | < .1            | < .003         | 0.066         | < .1         |                |                |                | 2.43            |                 | 192.4                        |
| 1467          | 8/30/2011   | Pressure Tank                  | Valley               |                                                      | Calcium-Bicarbonate              | 140               | < .03           | < .001         | 0.14          |              | < .2           | < .001         | 33             | 1               | < .002          | 421                          |
| 1468          | 5/13/2010   | Kitchen Sink                   | Upland               |                                                      |                                  |                   | < .1            | < .003         | 0.18          | < .1         |                |                |                | 3.12            |                 | 234                          |
| 1469          | 5/13/2010   | Outside Spigot                 | Upland               |                                                      |                                  |                   | < .1            | < .003         | 0.109         | < .1         |                |                |                | 3.93            |                 | 269                          |
| 1470          | 8/30/2011   | Inside Faucet                  | Upland               |                                                      | Calcium-Bicarbonate              | 130               | < .03           | < .001         | 0.094         |              | < .2           | < .001         | 35             | 1.8             | 0.0047          | 173                          |
| 1471          | 7/7/2009    | Kitchen Sink                   | Upland               |                                                      |                                  |                   | < .05           |                | 0.076         |              |                |                |                | 2.6             |                 |                              |
| 1472          | 5/20/2010   | Kitchen Sink                   | Upland               |                                                      |                                  |                   | < .1            | < .003         | 0.143         | < .1         |                |                |                |                 |                 | 213                          |
| 1473          | 5/20/2010   | Basement At Pressure Tank      | Upland               |                                                      |                                  |                   | < .1            | < .003         | 0.093         | < .1         |                |                |                | 2.93            |                 | 136.3                        |
| 1474          | 5/20/2010   | Pressure Tank- Quarry Top Well | Upland               |                                                      |                                  |                   |                 |                |               |              |                |                |                | 5.28            |                 |                              |
| 1475          | 5/20/2010   | Pressure Tank At Trailer Park  | Upland               |                                                      |                                  |                   | < .1            | < .003         | 0.218         | < .1         |                |                |                | 6.27            |                 | 218                          |
| 1476          | 5/20/2010   | Quarry Sulfur Well             | Upland               |                                                      |                                  |                   | < .1            | < .003         | 0.204         | < .1         |                |                |                | 6.51            |                 | 223                          |
| 1477          | 5/20/2010   | Spigot In Garage               | Upland               |                                                      |                                  |                   | < .1            | < .003         | 0.131         | < .1         |                |                |                | 6.17            |                 | 120.8                        |
| 1478          | 3/16/2010   | Outside Spigot                 | Upland               |                                                      |                                  |                   | < .1            |                | 0.096         |              |                |                |                | < 2             |                 |                              |



Table S.8. Groundwater Quality Data for 1701 "Pre-Drill" Water Well Samples from Susquehanna County, Pennsylvania

| Water Well ID | Sample Date | Sampling Port                                      | Topographic Location | Gas Extraction Area (Within 1 km of Active Gas Well) | Groundwater Type (If Determined)    | Alkalinity (mg/L) | Aluminum (mg/L) | Arsenic (mg/L) | Barium (mg/L) | Boron (mg/L) | Bromide (mg/L) | Cadmium (mg/L) | Calcium (mg/L) | Chloride (mg/L) | Chromium (mg/L) | Conductivity - Field (µs/cm) |       |
|---------------|-------------|----------------------------------------------------|----------------------|------------------------------------------------------|-------------------------------------|-------------------|-----------------|----------------|---------------|--------------|----------------|----------------|----------------|-----------------|-----------------|------------------------------|-------|
| 1479          | 4/19/2009   | Kitchen Sink                                       | Upland               |                                                      |                                     |                   | < .05           |                | 0.097         |              |                |                |                | 5.93            |                 |                              |       |
| 1480          | 3/18/2010   | Kitchen Sink                                       | Upland               |                                                      |                                     |                   | < .1            | < .003         | 0.044         | < .05        |                |                |                | 3.25            |                 |                              |       |
| 1481          | 3/18/2010   | Pressure Tank                                      | Upland               | Yes                                                  |                                     |                   | < .1            | < .003         | 0.085         | < .05        |                |                |                | 5.63            |                 | 81.8                         |       |
| 1482          | 3/22/2010   | Kitchen Sink                                       | Valley               | Yes                                                  |                                     |                   | < .1            | < .003         | 0.048         | < .05        |                |                |                | 4.73            |                 | 123.1                        |       |
| 1483          | 1/13/2011   |                                                    | Valley               | Yes                                                  | Calcium-Bicarbonate                 | 120               | < .01           | 0.003          | 0.41          |              |                | < .0001        | 29             | 21.8            | < .002          |                              |       |
| 1484          | 3/25/2010   | Basement At Pressure Tank                          | Upland               |                                                      |                                     |                   | < .1            | < .003         | 0.044         | < .05        |                |                |                | 5.24            |                 | 254                          |       |
| 1485          | 3/25/2010   | Hand Dug Well                                      | Valley               |                                                      |                                     |                   | < .1            | < .003         | 0.031         | < .05        |                |                |                | 2.56            |                 | 55                           |       |
| 1486          | 6/14/2011   | Directly From Pressure Tank Cwt In Sw Corner Of Ba | Upland               | Yes                                                  | Calcium-Bicarbonate                 | 58                | 0.31            | < .001         | 0.034         |              |                | < .2           | < .001         | 14              | 1               | < .002                       | 0.108 |
| 1487          | 6/14/2011   | Kitchen Sink                                       | Upland               |                                                      | Calcium-Bicarbonate                 | 170               | < .03           | 0.001          | 0.1           |              |                | < .2           | < .001         | 40              | < 1             | < .002                       | 0.246 |
| 1488          | 6/14/2011   | Hose Bib                                           | Upland               |                                                      | Calcium-Bicarbonate-Chloride        | 28                | 0.034           | < .001         | 0.078         |              |                | < .2           | < .001         | 18              | 7.4             | < .002                       | 0.174 |
| 1489          | 3/25/2010   | Spring At Overflow Pipe                            | Valley               |                                                      |                                     |                   | < .1            | < .003         | 0.048         | < .05        |                |                |                | 5.52            |                 | 82.4                         |       |
| 1490          | 6/14/2011   | Outside Hose Bib On Sw End Of Home                 | Valley               |                                                      | Calcium-Bicarbonate                 | 110               | < .03           | 0.0017         | 0.13          |              |                | < .2           | < .001         | 31              | 11              | < .002                       | 0.209 |
| 1491          | 3/28/2010   | Basement At Pressure Tank                          | Upland               |                                                      |                                     |                   | < .1            | 0.016          | 0.549         | 0.075        |                |                |                | 5.2             |                 | 371                          |       |
| 1492          | 1/13/2011   |                                                    | Upland               | Yes                                                  | Calcium-Bicarbonate                 | 85                | <0.01           | 0.0015         | 0.14          |              |                | <0.0001        | 28             | 5.68            | <0.0020         | 157                          |       |
| 1493          | 6/16/2011   | Wash Tub In Garage                                 | Upland               |                                                      | Calcium-Bicarbonate                 | 150               | < .03           | < .001         | 0.087         |              |                | < .2           | < .001         | 34              | < 1             | < .002                       | 0.061 |
| 1494          | 6/16/2011   | Kitchen Sink                                       | Valley               |                                                      | Calcium-Sodium-Bicarbonate-Chloride | 57                | 0.054           | < .001         | 0.071         |              |                | < .2           | < .001         | 24              | 44              | < .002                       | 456   |
| 1495          | 6/27/2011   | Bathroom Sink Body Shop                            | Valley               | Yes                                                  | Calcium-Bicarbonate                 | 110               | < .03           | < .001         | 0.16          |              |                | < .2           | < .001         | 22              | 1.9             | < .002                       | 265   |
| 1496          | 6/28/2011   | Garage Sink                                        | Valley               |                                                      | Calcium-Bicarbonate                 | 110               | < .03           | < .001         | 0.14          |              |                | < .2           | < .001         | 30              | 1.6             | < .002                       | 268   |
| 1497          | 6/28/2011   | Kitchen Sink                                       | Upland               |                                                      | Calcium-Bicarbonate                 | 120               | < .03           | < .001         | 0.077         |              |                | < .2           | < .001         | 35              | 4.3             | < .002                       | 297   |

Table S.8. Groundwater Quality Data for 1701 "Pre-Drill" Water Well Samples from Susquehanna County, Pennsylvania

| Water Well ID | Sample Date | Sampling Port               | Topographic Location | Gas Extraction Area (Within 1 km of Active Gas Well) | Groundwater Type (If Determined) | Alkalinity (mg/L) | Aluminum (mg/L) | Arsenic (mg/L) | Barium (mg/L) | Boron (mg/L) | Bromide (mg/L) | Cadmium (mg/L) | Calcium (mg/L) | Chloride (mg/L) | Chromium (mg/L) | Conductivity - Field (µs/cm) |
|---------------|-------------|-----------------------------|----------------------|------------------------------------------------------|----------------------------------|-------------------|-----------------|----------------|---------------|--------------|----------------|----------------|----------------|-----------------|-----------------|------------------------------|
| 1498          | 3/18/2010   | Kitchen Sink                | Upland               |                                                      |                                  |                   | < .1            | < .003         | 0.205         | < .05        |                |                |                | 8.04            |                 | 259                          |
| 1499          | 5/21/2010   | Kitchen Sink                | Upland               | Yes                                                  |                                  |                   | < .1            | < .003         | 0.068         | < .1         |                |                |                |                 |                 | 317                          |
| 1500          | 5/21/2010   | Hand Dug #1                 | Upland               | Yes                                                  |                                  |                   | < .1            | < .003         | < .025        | < .1         |                |                |                |                 |                 | 61.7                         |
| 1501          | 7/6/2011    | Kitchen Sink                | Upland               |                                                      | Calcium-Bicarbonate              | 120               | 0.031           | < .001         | 0.15          |              | < .2           | < .001         | 41             | 4.3             | < .002          | 302                          |
| 1502          | 7/6/2011    | Kitchen Sink                | Upland               |                                                      | Calcium-Bicarbonate              | 79                | < .03           | 0.0013         | 0.21          |              | < .2           | < .001         | 23             | 5.5             | < .002          | 243                          |
| 1503          | 5/21/2010   | Hand Dug Well #2            | Upland               | Yes                                                  |                                  |                   | < .1            | < .003         | < .025        | < .1         |                |                |                |                 |                 | 76.1                         |
| 1504          | 7/6/2011    | Kitchen Sink                | Valley               |                                                      | Calcium-Bicarbonate              | 62                | < .03           | < .001         | 0.12          |              | < .2           | < .001         | 21             | 5.9             | < .002          | 194                          |
| 1505          | 7/6/2011    | Kitchen Sink                | Upland               |                                                      | Calcium-Bicarbonate              | 120               | < .03           | < .001         | 0.1           |              | < .2           | < .001         | 30             | 5               | < .002          | 0.09                         |
| 1506          | 7/7/2011    | Pressure Tank Tap           | Valley               |                                                      | Calcium-Bicarbonate              | 68                | < .03           | < .001         | 0.058         |              | < .2           | < .001         | 22             | 3               | < .002          | 191                          |
| 1507          | 5/21/2010   |                             | Valley               |                                                      |                                  |                   | < .1            | < .003         | 0.113         | < .1         |                |                |                |                 |                 |                              |
| 1508          | 7/14/2011   | Outdoor Spigot              | Upland               |                                                      | Calcium-Bicarbonate              | 130               | < .03           | < .001         | 0.13          |              | < .2           | < .001         | 42             | 3               | < .002          | 251                          |
| 1509          | 7/16/2011   | Pressure Tank               | Valley               |                                                      | Calcium-Sodium-Bicarbonate       | 110               | < .03           | 0.0042         | 0.23          |              | < .2           | < .001         | 19             | 1.4             | < .002          | 0.143                        |
| 1510          | 5/22/2010   | Spare Well                  | Upland               |                                                      |                                  |                   | < .1            | < .003         | < .039        | < .1         |                |                |                |                 |                 | 91.1                         |
| 1511          | 5/22/2010   | Kitchen Sink                | Upland               |                                                      |                                  |                   | < .1            | < .003         | 0.104         | < .1         |                |                |                |                 |                 | 336                          |
| 1512          | 7/18/2011   | Outside Hose Bib            | Upland               |                                                      | Calcium-Bicarbonate              | 120               | 0.31            | 0.002          | 0.14          |              | < .2           | < .001         | 36             | 7               | < .002          | 0.203                        |
| 1513          | 7/18/2011   | Hydrant Northwest Of Well   | Upland               |                                                      | Calcium-Bicarbonate              | 160               | < .03           | 0.0017         | 0.27          |              | < .2           | < .001         | 48             | 40              | < .002          | 0.453                        |
| 1514          | 7/18/2011   |                             | Valley               | Yes                                                  | Calcium-Bicarbonate              | 98                | < .03           | < .001         | 0.021         |              | < .2           | < .001         | 31             | 1.3             | < .002          |                              |
| 1515          | 5/16/2011   | Pressure Tank               | Upland               |                                                      | Calcium-Bicarbonate              | 110               | <0.03           | 0.001          | 0.05          |              | <0.2           | <0.001         | 27             | 3.9             | <0.002          |                              |
| 1516          | 5/16/2011   | Slop Sink In Barn           | Upland               |                                                      | Calcium-Bicarbonate              | 85                | < .03           | < .001         | 0.093         |              | < .2           | < .001         | 20             | 3               | < .002          | 0.202                        |
| 1517          | 5/16/2011   | Pressure Tank               | Upland               |                                                      | Calcium-Bicarbonate              | 170               | < .03           | < .001         | 0.087         |              | < .2           | < .001         | 30             | 1.5             | < .002          | 297                          |
| 1518          | 5/16/2011   | Outdoor Spigot              | Upland               |                                                      | Calcium-Bicarbonate              | 41                | 0.064           | < .001         | 0.035         |              | < .2           | < .001         | 13             | 1.1             | < .002          | 98                           |
| 1519          | 7/25/2011   | Kitchen Sink Cold Water Tap | Upland               |                                                      | Calcium-Bicarbonate              | 100               | < .03           | 0.0018         | 0.097         |              | < .2           | < .001         | 29             | 12              | < .002          | 0.954                        |
| 1520          | 5/17/2011   | Outside Spigot              | Upland               |                                                      | Calcium-Bicarbonate              | 140               | < .03           | < .001         | 0.1           |              | < .2           | < .001         | 27             | 2               | < .002          | 211                          |
| 1521          | 5/17/2011   | Kitchen Sink                | Valley               |                                                      | Calcium-Sodium-Bicarbonate       | 150               | < .03           | < .001         | 0.39          |              | < .2           | < .001         | 17             | 2.8             | < .002          | 247                          |

Table S.8. Groundwater Quality Data for 1701 "Pre-Drill" Water Well Samples from Susquehanna County, Pennsylvania

| Water Well ID | Sample Date | Sampling Port                     | Topographic Location | Gas Extraction Area (Within 1 km of Active Gas Well) | Groundwater Type (If Determined) | Alkalinity (mg/L) | Aluminum (mg/L) | Arsenic (mg/L) | Barium (mg/L) | Boron (mg/L) | Bromide (mg/L) | Cadmium (mg/L) | Calcium (mg/L) | Chloride (mg/L) | Chromium (mg/L) | Conductivity - Field (µs/cm) |
|---------------|-------------|-----------------------------------|----------------------|------------------------------------------------------|----------------------------------|-------------------|-----------------|----------------|---------------|--------------|----------------|----------------|----------------|-----------------|-----------------|------------------------------|
| 1522          | 5/17/2011   | Kitchen Sink                      | Valley               |                                                      | Calcium-Sodium-Bicarbonate       | 130               | < .03           | < .001         | 0.36          |              | < .2           | < .001         | 20             | 1.8             | < .002          | 230                          |
| 1523          | 5/17/2011   | Outdoor Spigot                    | Upland               |                                                      | Calcium-Bicarbonate              | 100               | < .03           | < .001         | 0.13          |              | < .2           | < .001         | 22             | 1.3             | < .002          |                              |
| 1524          | 5/17/2011   | Garage Pressure Tank              | Upland               |                                                      | Calcium-Bicarbonate              | 110               | < .03           | < .001         | 0.11          |              | < .2           | < .001         | 24             | 3.9             | < .002          | 201                          |
| 1525          | 3/31/2010   | Spigot On Porch                   | Valley               |                                                      |                                  |                   | < .1            | < .003         | 0.029         | < .05        |                |                |                | 57.4            |                 | 341                          |
| 1526          | 5/17/2011   | Pressure Tank Spigot              | Upland               |                                                      | Calcium-Bicarbonate              | 100               | < .03           | < .001         | 0.15          |              | < .2           | < .001         | 22             | 4               | < .002          | 193                          |
| 1527          | 3/31/2010   | Hydrant At Well Head              | Upland               |                                                      |                                  |                   | < .1            | < .003         | 0.144         | < .05        |                |                |                | 6.68            |                 | 181.1                        |
| 1528          | 8/4/2011    | Inside Faucet                     | Valley               |                                                      | Calcium-Bicarbonate              | 110               | < .03           | < .001         | 0.23          |              | < .2           | < .001         | 25             | 2.5             | < .002          | 276                          |
| 1529          | 8/9/2011    | Outside Faucet                    | Upland               |                                                      | Calcium-Bicarbonate              | 88                | <.03            | <0.001         | 0.11          |              | <0.2           | <0.001         | 22             | 2.3             | <0.002          |                              |
| 1530          | 3/28/2010   | Prssure Tank At Fitzsimon'S House | Upland               |                                                      |                                  |                   | < .1            | < .003         | 0.026         | < .05        |                |                |                | 20.2            |                 | 155.9                        |
| 1531          | 5/18/2011   | Kitchen Sink                      | Upland               |                                                      | Calcium-Bicarbonate              | 100               | <0.03           | <0.001         | 0.11          |              | <0.2           | <0.001         | 22             | 4.1             | <0.002          | 211                          |
| 1532          | 5/18/2011   | Kitchen Sink                      | Upland               |                                                      | Sodium-Bicarbonate               | 140               | < .03           | < .001         | 0.3           |              | < .2           | < .001         | 12             | 5.5             | < .002          | 251                          |
| 1533          | 5/18/2011   | Kitchen Sink                      | Upland               |                                                      | Calcium-Bicarbonate-Chloride     | 24                | < .03           | < .001         | 0.047         |              | < .2           | < .001         | 10             | 8.2             | < .002          | 108                          |
| 1534          | 5/18/2011   | Kitchen Sink                      | Upland               |                                                      | Calcium-Sodium-Bicarbonate       | 110               | <0.03           | <0.001         | 0.14          |              | <0.2           | <0.001         | 17             | 3.2             | <0.002          | 212                          |
| 1535          | 3/28/2010   | Pressure Tank In Furnace Room     | Upland               |                                                      |                                  |                   | < .1            | < .003         | 0.114         | < .05        |                |                |                | 7.14            |                 | 122.9                        |
| 1536          | 5/19/2011   | Bathroom Sink Body Shop           | Valley               | Yes                                                  | Calcium-Bicarbonate              | 110               | < .03           | < .001         | 0.13          |              | < .2           | < .001         | 22             | 1.4             | < .002          | 194                          |
| 1537          | 4/1/2010    | Pressure Tank                     | Upland               |                                                      |                                  |                   | < .1            | < .003         | 0.037         | < .1         |                |                |                | 3.93            |                 |                              |
| 1538          | 5/24/2011   | Basement Pressure Tank            | Valley               |                                                      | Sodium-Bicarbonate               | 200               | < .03           | < .001         | 0.66          |              | 0.37           | < .001         | 4.1            | 24              | < .002          | 400                          |
| 1539          | 5/24/2011   | Kitchen Sink                      | Upland               |                                                      | Calcium-Bicarbonate              | 130               | < .03           | < .001         | 0.25          |              | < .2           | < .001         | 24             | < 1             | < .002          | 285                          |
| 1540          | 4/5/2010    | Kitchen Sink                      | Upland               |                                                      |                                  |                   | 0.19            | < .003         | 0.077         | < .1         |                |                |                | 9.46            |                 |                              |
| 1541          | 4/5/2010    | Kitchen Sink Father'S             | Upland               |                                                      |                                  |                   | < .1            | < .003         | 0.468         | < .1         |                |                |                | 6.51            |                 |                              |

Table S.8. Groundwater Quality Data for 1701 "Pre-Drill" Water Well Samples from Susquehanna County, Pennsylvania

| Water Well ID | Sample Date | Sampling Port                             | Topographic Location | Gas Extraction Area (Within 1 km of Active Gas Well) | Groundwater Type (If Determined) | Alkalinity (mg/L) | Aluminum (mg/L) | Arsenic (mg/L) | Barium (mg/L) | Boron (mg/L) | Bromide (mg/L) | Cadmium (mg/L) | Calcium (mg/L) | Chloride (mg/L) | Chromium (mg/L) | Conductivity - Field (µs/cm) |
|---------------|-------------|-------------------------------------------|----------------------|------------------------------------------------------|----------------------------------|-------------------|-----------------|----------------|---------------|--------------|----------------|----------------|----------------|-----------------|-----------------|------------------------------|
| 1542          | 5/24/2011   | Pressure Tank                             | Valley               | Yes                                                  | Calcium-Bicarbonate              | 100               | < .03           | 0.0018         | 0.092         |              | < .2           | < .001         | 44             | 21              | < .002          | 0.25                         |
| 1543          | 4/1/2010    | Kitchen Sink                              | Upland               |                                                      |                                  |                   | < .1            | < .003         | 0.07          | < .1         |                |                |                | 15.4            |                 |                              |
| 1544          | 4/1/2010    | Kitchen Sink                              | Upland               |                                                      |                                  |                   | < .1            | < .003         | 0.082         | < .1         |                |                |                | 12              |                 | 35.3                         |
| 1545          | 6/1/2011    | Kitchen Sink                              | Upland               |                                                      | Calcium-Bicarbonate              | 170               | < .03           | 0.0013         | 0.16          |              | < .2           | < .001         | 42             | 2.1             | < .002          | 302                          |
| 1546          | 4/1/2010    | Kitchen Sink                              | Upland               |                                                      |                                  |                   | < .1            | < .003         | 0.145         | < .1         |                |                |                | 13.5            |                 | 223                          |
| 1547          | 6/2/2011    | Township Bldg Garage Slop Sink            | Valley               |                                                      | Calcium-Sodium-Bicarbonate       | 170               | < .03           | 0.0029         | 0.15          |              | < .2           | < .001         | 31             | 3               | < .002          | 278                          |
| 1548          | 6/3/2011    | Outside Spigot                            | Valley               |                                                      | Sodium-Bicarbonate               | 180               | < .03           | 0.025          | 0.27          |              | < .2           | < .001         | 14             | 2.9             | < .002          | 303                          |
| 1549          | 6/3/2011    | Pressure Tank                             | Valley               | Yes                                                  | Calcium-Bicarbonate              | 140               | <.03            | 0.0011         | 0.12          |              | <.2            | <0.001         | 40             | 14              | <0.002          |                              |
| 1550          | 6/9/2011    | Outside Spigot                            | Valley               | Yes                                                  | Calcium-Bicarbonate              | 91                | < .03           | < .001         | 0.037         |              | < .2           | < .001         | 34             | 17              | < .002          | 238                          |
| 1551          | 6/9/2011    | Kitchen Sink                              | Upland               |                                                      | Calcium-Bicarbonate              | 170               | < .03           | < .001         | 0.2           |              | < .2           | < .001         | 49             | 3.4             | < .002          | 322                          |
| 1552          | 6/10/2011   | Pressure Tank (Basement Back Left Closet) | Valley               | Yes                                                  | Calcium-Bicarbonate              | 110               | < .03           | < .001         | 0.095         |              | < .2           | < .001         | 33             | 5.1             | < .002          | 243                          |
| 1553          | 6/10/2011   |                                           | Valley               |                                                      | Calcium-Sodium-Bicarbonate       | 190               | <.03            | 0.0013         | 0.06          |              | <.2            | <0.001         | 40             | 1.2             | <0.002          |                              |
| 1554          | 3/28/2010   | Outside Spigot                            | Upland               |                                                      |                                  |                   | < .1            | < .003         | < .025        | < .05        |                |                |                | 3.38            |                 | 363                          |
| 1555          | 4/9/2010    | Basement Pressure Tank                    | Upland               |                                                      |                                  |                   | < .1            | < .003         | 0.1           | < .1         |                |                |                | 3.05            |                 | 110.4                        |
| 1556          | 4/9/2010    | Kitchen Sink                              | Valley               | Yes                                                  |                                  |                   | < .1            | < .003         | 0.154         | < .1         |                |                |                | 10.4            |                 | 116                          |
| 1557          | 4/9/2010    | Basement Pressure Tank                    | Valley               |                                                      |                                  |                   | 0.1             | < .003         | 0.855         | 0.186        |                |                |                | 6.36            |                 | 285                          |
| 1558          | 5/27/2010   | Garage Sink                               | Valley               |                                                      |                                  |                   | < .1            | < .003         | 0.072         | < .1         |                |                |                |                 |                 | 163.3                        |
| 1559          | 5/27/2010   |                                           | Upland               |                                                      |                                  |                   | < .1            | < .003         | 0.116         | < .1         |                |                |                |                 |                 |                              |
| 1560          | 5/27/2010   | Outside Spigot                            | Upland               |                                                      |                                  |                   | < .1            | < .003         | 0.062         | < .1         |                |                |                |                 |                 | 67.5                         |
| 1561          | 6/3/2010    | Main House Kitchen Sink                   | Upland               |                                                      |                                  |                   |                 |                |               |              |                |                |                |                 |                 |                              |
| 1562          | 6/4/2010    | Outside Hydrant                           | Upland               |                                                      |                                  |                   |                 |                |               |              |                |                |                |                 |                 | 276                          |
| 1563          | 6/4/2010    | Kitchen Sink                              | Upland               | Yes                                                  |                                  |                   |                 |                |               |              |                |                |                |                 |                 | 402                          |

Table S.8. Groundwater Quality Data for 1701 "Pre-Drill" Water Well Samples from Susquehanna County, Pennsylvania

| Water Well ID | Sample Date | Sampling Port    | Topographic Location | Gas Extraction Area (Within 1 km of Active Gas Well) | Groundwater Type (If Determined) | Alkalinity (mg/L) | Aluminum (mg/L) | Arsenic (mg/L) | Barium (mg/L) | Boron (mg/L) | Bromide (mg/L) | Cadmium (mg/L) | Calcium (mg/L) | Chloride (mg/L) | Chromium (mg/L) | Conductivity - Field (µs/cm) |
|---------------|-------------|------------------|----------------------|------------------------------------------------------|----------------------------------|-------------------|-----------------|----------------|---------------|--------------|----------------|----------------|----------------|-----------------|-----------------|------------------------------|
| 1564          | 6/4/2010    | Kitchen Sink     | Upland               |                                                      |                                  |                   |                 |                |               |              |                |                |                |                 |                 |                              |
| 1565          | 6/4/2010    | Kitchen Sink     | Valley               |                                                      |                                  |                   |                 |                |               |              |                |                |                |                 |                 | 333                          |
| 1566          | 6/13/2010   | Kitchen Sink     | Valley               |                                                      |                                  |                   |                 |                |               |              |                |                |                |                 |                 | 250                          |
| 1567          | 6/13/2010   | Hydrant On Well  | Valley               |                                                      |                                  |                   |                 |                |               |              |                |                |                |                 |                 | 266                          |
| 1568          | 6/13/2010   | Kitchen Sink     | Valley               |                                                      |                                  |                   |                 |                |               |              |                |                |                |                 |                 | 301                          |
| 1569          | 6/13/2010   | Kitchen Sink     | Upland               |                                                      |                                  |                   |                 |                |               |              |                |                |                |                 |                 | 197                          |
| 1570          | 6/13/2010   |                  | Valley               |                                                      |                                  |                   |                 |                |               |              |                |                |                |                 |                 |                              |
| 1571          | 6/13/2010   | Kitchen Sink     | Valley               |                                                      |                                  |                   |                 |                |               |              |                |                |                |                 |                 | 84.7                         |
| 1572          | 6/12/2010   | Pressure Tank    | Upland               |                                                      |                                  |                   |                 |                |               |              |                |                |                |                 |                 | 182.9                        |
| 1573          | 6/7/2010    | Outside Spigot   | Upland               |                                                      |                                  |                   |                 |                |               |              |                |                |                |                 |                 | 846                          |
| 1574          | 6/7/2010    | Spring Pipe      | Upland               |                                                      |                                  |                   |                 |                |               |              |                |                |                |                 |                 | 77.7                         |
| 1575          | 6/7/2010    | Kitchen Sink     | Upland               |                                                      |                                  |                   |                 |                |               |              |                |                |                |                 |                 | 438                          |
| 1576          | 6/10/2010   | Pressure Tank    | Upland               |                                                      |                                  |                   | < .1            | < .003         | 0.116         | < .1         |                |                |                | 7.07            |                 | 156                          |
| 1577          | 6/10/2010   | Kitchen Sink     | Upland               |                                                      |                                  |                   |                 |                |               |              |                |                |                |                 |                 | 175.5                        |
| 1578          | 6/10/2010   | Pressure Tank    | Upland               |                                                      |                                  |                   |                 |                |               |              |                |                |                |                 |                 | 168.3                        |
| 1579          | 6/10/2010   | Kitchen Sink     | Upland               |                                                      |                                  |                   |                 |                |               |              |                |                |                |                 |                 | 336                          |
| 1580          | 6/10/2010   | Kitchen Sink     | Valley               |                                                      |                                  |                   |                 |                |               |              |                |                |                |                 |                 | 387                          |
| 1581          | 6/10/2010   |                  | Upland               |                                                      |                                  |                   |                 |                |               |              |                |                |                |                 |                 |                              |
| 1582          | 6/10/2010   | Kitchen Sink     | Upland               |                                                      |                                  |                   |                 |                |               |              |                |                |                |                 |                 | 238                          |
| 1583          | 3/25/2009   |                  | Valley               | Yes                                                  |                                  |                   | <0.05           |                | <0.025        |              |                |                |                | <2              |                 |                              |
| 1584          | 6/10/2010   | Kitchen Sink     | Upland               |                                                      |                                  |                   |                 |                |               |              |                |                |                |                 |                 | 124.1                        |
| 1585          | 6/12/2010   | Pressure Tank    | Upland               |                                                      |                                  |                   |                 |                |               |              |                |                |                |                 |                 | 130.1                        |
| 1586          | 6/12/2010   | Kitchen Faucet   | Upland               |                                                      |                                  |                   |                 |                |               |              |                |                |                |                 |                 | 200                          |
| 1587          | 6/12/2010   | Bathroom Faucet  | Valley               |                                                      |                                  |                   |                 |                |               |              |                |                |                |                 |                 | 250                          |
| 1588          | 6/14/2010   | At Pressure Tank | Valley               |                                                      |                                  |                   |                 |                |               |              |                |                |                |                 |                 |                              |
| 1589          | 6/14/2010   | Kitchen Sink     | Upland               |                                                      |                                  |                   |                 |                |               |              |                |                |                |                 |                 | 197.7                        |
| 1590          | 4/4/2009    |                  | Valley               |                                                      |                                  |                   | < .05           |                | 0.056         |              |                |                |                | 3.7             |                 |                              |
| 1591          | 6/2/2011    | Dug Well         | Upland               | Yes                                                  | Calcium-Bicarbonate              | 24                | 0.036           | <0.001         | 0.049         |              | <0.2           | <0.001         | 16             | 2.3             | <0.002          | 0.102                        |

Table S.8. Groundwater Quality Data for 1701 "Pre-Drill" Water Well Samples from Susquehanna County, Pennsylvania

| Water Well ID | Sample Date | Sampling Port     | Topographic Location | Gas Extraction Area (Within 1 km of Active Gas Well) | Groundwater Type (If Determined) | Alkalinity (mg/L) | Aluminum (mg/L) | Arsenic (mg/L) | Barium (mg/L) | Boron (mg/L) | Bromide (mg/L) | Cadmium (mg/L) | Calcium (mg/L) | Chloride (mg/L) | Chromium (mg/L) | Conductivity - Field (µs/cm) |
|---------------|-------------|-------------------|----------------------|------------------------------------------------------|----------------------------------|-------------------|-----------------|----------------|---------------|--------------|----------------|----------------|----------------|-----------------|-----------------|------------------------------|
| 1592          | 3/4/2009    |                   | Valley               |                                                      |                                  |                   | < .05           |                | 0.051         |              |                |                |                | 2.95            |                 |                              |
| 1593          | 4/19/2009   |                   | Upland               |                                                      |                                  |                   | < .05           |                | 0.082         |              |                |                |                | 5.3             |                 |                              |
| 1594          | 9/1/2009    |                   | Upland               | Yes                                                  |                                  |                   | < .1            |                | 0.107         |              |                |                |                | 26.2            |                 |                              |
| 1595          | 7/19/2011   |                   | Upland               |                                                      |                                  |                   |                 |                |               |              |                |                |                |                 |                 |                              |
| 1596          | 2/20/2009   | Barn Sink         | Valley               |                                                      |                                  |                   | <0.05           |                | 0.412         |              |                |                |                | 18.4            |                 |                              |
| 1597          | 2/26/2009   | Barn Sink         | Upland               |                                                      |                                  |                   | <0.05           |                | 0.063         |              |                |                |                | <1              |                 |                              |
| 1598          | 11/9/2009   | Pressure Tank     | Valley               | Yes                                                  |                                  |                   | < .1            |                | 0.523         |              |                |                |                | 2.14            |                 |                              |
| 1599          | 12/6/2009   | Kitchen Faucet    | Upland               |                                                      |                                  |                   | < .1            |                | 0.077         |              |                |                |                | 2.37            |                 |                              |
| 1600          | 12/6/2009   | Kitchen Faucet    | Valley               | Yes                                                  |                                  |                   | < .1            |                | 0.091         |              |                |                |                | 7.26            |                 |                              |
| 1601          | 12/6/2009   | Pressure Tank     | Valley               | Yes                                                  |                                  |                   | < .1            |                | 0.098         |              |                |                |                | 7.12            |                 |                              |
| 1602          | 12/6/2009   | Kitchen Faucet    | Upland               |                                                      |                                  |                   | < .1            |                | 0.141         |              |                |                |                | 27              |                 |                              |
| 1603          | 12/15/2009  | Kitchen Sink      | Upland               |                                                      |                                  |                   | <0.1            |                | 0.102         |              |                |                |                | 6.22            |                 |                              |
| 1604          | 12/17/2009  | Pressure Tank     | Upland               |                                                      |                                  |                   | < .1            |                | 0.029         |              |                |                |                | < 2             |                 |                              |
| 1605          | 1/11/2010   | Pressure Tank     | Upland               |                                                      |                                  |                   | < .1            |                | 0.108         |              |                |                |                | 9.25            |                 |                              |
| 1606          | 1/11/2010   | Kitchen Faucet    | Upland               |                                                      |                                  |                   | < .1            |                | 0.187         |              |                |                |                | 5.38            |                 |                              |
| 1607          | 1/11/2010   | Kitchen Sink      | Upland               |                                                      |                                  |                   | <0.1            |                | 0.089         |              |                |                |                | 4.66            |                 |                              |
| 1608          | 1/11/2010   | Pressure Tank     | Upland               |                                                      |                                  |                   | < .1            |                | 0.075         |              |                |                |                | 5.02            |                 |                              |
| 1609          | 1/11/2010   | Pressure Tank     | Upland               |                                                      |                                  |                   | < .1            |                | 0.674         |              |                |                |                | 3.52            |                 |                              |
| 1610          | 1/11/2010   | Pressure Tank     | Upland               |                                                      |                                  |                   | < .1            |                | 0.286         |              |                |                |                | 2.55            |                 |                              |
| 1611          | 1/12/2010   | Spigot Into House | Upland               | Yes                                                  |                                  |                   | 0.973           |                | 0.076         |              |                |                |                | 21.4            |                 |                              |
| 1612          | 1/16/2010   | Pressure Tank     | Upland               |                                                      |                                  |                   | < .1            |                | 0.445         |              |                |                |                | 26.1            |                 |                              |
| 1613          | 1/21/2010   | Kitchen Sink      | Upland               | Yes                                                  |                                  |                   | <0.1            |                | 0.052         |              |                |                |                | 43.1            |                 |                              |
| 1614          | 2/4/2010    | Pressure Tank     | Valley               |                                                      |                                  |                   | <0.1            |                | 0.114         |              |                |                |                | 18.9            |                 |                              |
| 1615          | 2/4/2010    | Kitchen Sink      | Upland               |                                                      |                                  |                   | <0.1            |                | 0.161         |              |                |                |                | 6.08            |                 |                              |
| 1616          | 2/6/2010    | Kitchen Sink      | Valley               |                                                      |                                  |                   | <.1             |                | 0.166         |              |                |                |                | 32              |                 |                              |
| 1617          | 2/15/2010   | Kitchen Sink      | Valley               |                                                      |                                  |                   | <0.1            |                | 0.25          |              |                |                |                | 10.8            |                 |                              |
| 1618          | 2/15/2010   | Kitchen Sink      | Valley               |                                                      |                                  |                   | <.1             |                | 0.242         |              |                |                |                | 11.4            |                 |                              |
| 1619          | 2/18/2010   | Bathroom Sink     | Valley               | Yes                                                  |                                  |                   | 0.452           |                | 0.147         |              |                |                |                | 21.5            |                 |                              |

Table S.8. Groundwater Quality Data for 1701 "Pre-Drill" Water Well Samples from Susquehanna County, Pennsylvania

| Water Well ID | Sample Date | Sampling Port      | Topographic Location | Gas Extraction Area (Within 1 km of Active Gas Well) | Groundwater Type (If Determined) | Alkalinity (mg/L) | Aluminum (mg/L) | Arsenic (mg/L) | Barium (mg/L) | Boron (mg/L) | Bromide (mg/L) | Cadmium (mg/L) | Calcium (mg/L) | Chloride (mg/L) | Chromium (mg/L) | Conductivity - Field (µs/cm) |
|---------------|-------------|--------------------|----------------------|------------------------------------------------------|----------------------------------|-------------------|-----------------|----------------|---------------|--------------|----------------|----------------|----------------|-----------------|-----------------|------------------------------|
| 1620          | 2/22/2010   | Kitchen Faucet     | Upland               |                                                      |                                  |                   | < .1            |                | 0.189         |              |                |                |                | 12.7            |                 |                              |
| 1621          | 2/27/2010   | Kitchen Sink       | Valley               |                                                      |                                  |                   | <0.1            |                | 0.068         |              |                |                |                | 7.07            |                 |                              |
| 1622          | 3/4/2010    | Bathroom Sink      | Upland               | Yes                                                  |                                  |                   | 0.232           |                | 0.061         |              |                |                |                | 24.8            |                 |                              |
| 1623          | 3/7/2010    | Pressure Tank      | Upland               |                                                      |                                  |                   | < .1            |                | 0.048         |              |                |                |                | < 2             |                 |                              |
| 1624          | 3/28/2010   | Kitchen Faucet     | Upland               |                                                      |                                  |                   | < .1            |                | 0.896         |              |                |                |                | 17              |                 |                              |
| 1625          | 4/8/2010    | Outside Faucet     | Upland               |                                                      |                                  |                   | < .1            | < .003         | 0.559         | < .1         |                |                |                | 12              |                 |                              |
| 1626          | 4/9/2010    | Kitchen Sink       | Valley               |                                                      |                                  |                   | <0.1            |                | 0.085         |              |                |                |                | 5.49            |                 |                              |
| 1627          | 4/10/2010   | Kitchen Sink       | Valley               |                                                      |                                  |                   | <0.1            | <0.003         | 0.165         | <0.1         |                |                |                | 7.41            |                 |                              |
| 1628          | 4/10/2010   | Pressure Tank      | Valley               |                                                      |                                  |                   | <0.1            | <0.003         | 1.03          | 0.196        |                |                |                | 55.5            |                 |                              |
| 1629          | 4/19/2010   | Kitchen Sink       | Valley               |                                                      |                                  |                   | <0.10           | <0.003         | 0.066         | <0.1         |                |                |                | 26.9            |                 |                              |
| 1630          | 4/22/2010   | Kitchen Sink       | Valley               |                                                      |                                  |                   | <0.1            | <0.003         | 0.194         |              |                |                |                | 55.5            |                 |                              |
| 1631          | 4/22/2010   | Kitchen Sink       | Valley               |                                                      |                                  |                   | <0.1            | <0.003         | 0.247         | <0.100       |                |                |                | 40.7            |                 |                              |
| 1632          | 4/22/2010   | Stepmother's House | Valley               |                                                      |                                  |                   | <0.10           | <0.003         | 0.191         | <0.1         |                |                |                | 43.8            |                 |                              |
| 1633          | 4/24/2010   | Kitchen Faucet     | Upland               | Yes                                                  |                                  |                   | < .1            | < .003         | 0.07          | < .1         |                |                |                | 4.63            |                 |                              |
| 1634          | 4/22/2010   | Outside Faucet     | Valley               |                                                      |                                  |                   | < .1            | < .003         | 0.338         | < .1         |                |                |                | 58              |                 |                              |
| 1635          | 5/1/2010    | Kitchen Faucet     | Valley               | Yes                                                  |                                  |                   | < .1            | 0.009          | 0.126         | < .1         |                |                |                | 2.24            |                 |                              |
| 1636          | 5/1/2010    | Kitchen Sink       | Upland               |                                                      |                                  |                   | <0.10           | <0.003         | 0.081         | <0.10        |                |                |                | 3.15            |                 |                              |
| 1637          | 5/21/2010   | Pressure Tank      | Valley               |                                                      |                                  |                   | < .1            | 0.006          | 0.05          | < .1         |                |                |                | 4.72            |                 |                              |
| 1638          | 6/3/2010    | Kitchen Faucet     | Upland               |                                                      |                                  |                   | < .1            | < .003         | 0.043         | < .1         |                |                |                |                 |                 |                              |
| 1639          | 6/7/2010    | Outside Spigot     | Upland               |                                                      |                                  |                   | <0.1            | 0.006          | 0.197         | <0.1         |                |                |                | 27.8            |                 |                              |
| 1640          | 6/12/2010   | Spigot In Garage   | Valley               |                                                      |                                  |                   | <0.1            | <0.003         | 0.08          | <0.1         |                |                |                | 50.8            |                 |                              |
| 1641          | 6/13/2010   | Kitchen Sink       | Valley               |                                                      |                                  |                   | <0.100          | <0.003         | 0.25          | <0.1         |                |                |                | 22.7            |                 |                              |
| 1642          | 6/13/2010   | Kitchen Sink       | Valley               |                                                      |                                  |                   |                 |                |               |              |                |                |                | 15.3            |                 |                              |
| 1643          | 6/23/2010   | Kitchen Faucet     | Upland               |                                                      |                                  |                   | < .1            | < .003         | 0.124         | < .1         |                |                |                | 18.8            |                 |                              |
| 1644          | 7/1/2010    | Kitchen Faucet     | Valley               |                                                      |                                  |                   | < 0.1           | < .003         | 0.156         | < .1         |                |                |                | 3.63            |                 |                              |

Table S.8. Groundwater Quality Data for 1701 "Pre-Drill" Water Well Samples from Susquehanna County, Pennsylvania

| Water Well ID | Sample Date | Sampling Port              | Topographic Location | Gas Extraction Area (Within 1 km of Active Gas Well) | Groundwater Type (If Determined) | Alkalinity (mg/L) | Aluminum (mg/L) | Arsenic (mg/L) | Barium (mg/L) | Boron (mg/L) | Bromide (mg/L) | Cadmium (mg/L) | Calcium (mg/L) | Chloride (mg/L) | Chromium (mg/L) | Conductivity - Field (µs/cm) |
|---------------|-------------|----------------------------|----------------------|------------------------------------------------------|----------------------------------|-------------------|-----------------|----------------|---------------|--------------|----------------|----------------|----------------|-----------------|-----------------|------------------------------|
| 1645          | 7/2/2010    | Kitchen Sink               | Valley               |                                                      |                                  |                   |                 |                |               |              |                |                |                |                 |                 | 167                          |
| 1646          | 7/6/2010    | Kitchen Faucet             | Valley               |                                                      |                                  |                   | < .1            | < .003         | 0.136         | < .1         |                |                |                | 2.76            |                 |                              |
| 1647          | 7/6/2010    | Kitchen Sink               | Upland               |                                                      |                                  |                   | <0.1            | <0.003         | 0.259         | <0.100       |                |                |                | 5.73            |                 |                              |
| 1648          | 7/6/2010    | Pressure Tank              | Upland               |                                                      |                                  |                   | <0.1            | <0.003         | 0.078         | <0.1         |                |                |                | 15.8            |                 |                              |
| 1649          | 7/7/2010    | Kitchen Sink               | Upland               |                                                      |                                  |                   | <0.1            | <0.003         | 0.157         | <0.10        |                |                |                | 8.69            |                 |                              |
| 1650          | 7/7/2010    | Kitchen Faucet             | Valley               |                                                      |                                  |                   | < .122          | < .003         | 0.139         | < .1         |                |                |                | 22.3            |                 |                              |
| 1651          | 7/7/2010    | Pressure Tank              | Valley               |                                                      |                                  |                   |                 |                |               |              |                |                |                | 10              |                 |                              |
| 1652          | 7/8/2010    | Kitchen Sink               | Upland               |                                                      |                                  |                   | <0.1            | <0.003         | 0.176         | <0.1         |                |                |                | 2.46            |                 |                              |
| 1653          | 7/9/2010    | Pressure Tank              | Valley               |                                                      |                                  |                   | < .1            | < .003         | 0.431         | < .1         |                |                |                | 3.96            |                 |                              |
| 1654          | 7/2/2010    | Kitchen Faucet             | Valley               |                                                      |                                  |                   | < .1            | < .003         | 0.333         |              |                |                |                | 8.35            |                 |                              |
| 1655          | 7/9/2010    | Outside Spigot             | Valley               |                                                      |                                  |                   | <0.1            | <0.003         | 0.141         | <0.1         |                |                |                | 4.13            |                 |                              |
| 1656          | 7/9/2010    | Kitchen Sink               | Valley               |                                                      |                                  |                   | <0.100          | <0.003         | 0.137         | <0.100       |                |                |                | 3.22            |                 |                              |
| 1657          | 7/7/2010    | Kitchen Faucet             | Upland               | Yes                                                  |                                  |                   | < .1            | < .003         | 0.16          | < .1         |                |                |                | 25.6            |                 |                              |
| 1658          | 7/7/2010    | Kitchen Sink               | Upland               |                                                      |                                  |                   | <0.1            | <0.003         | 0.172         | <0.100       |                |                |                | 35.8            |                 |                              |
| 1659          | 7/8/2010    | Kitchen Faucet             | Valley               |                                                      |                                  |                   | < .1            | 0.003          | 0.132         | < .1         |                |                |                | 2.57            |                 |                              |
| 1660          | 7/8/2010    | Kitchen Sink               | Upland               |                                                      |                                  |                   | <0.100          | <0.003         | 0.045         | <0.100       |                |                |                | 26.3            |                 |                              |
| 1661          | 7/10/2010   | Pressure Tank              | Upland               |                                                      |                                  |                   | < .1            | < .003         | 0.078         | < .1         |                |                |                | 7.43            |                 |                              |
| 1662          | 7/10/2010   | Basement Spigot Pre-Filter | Valley               |                                                      |                                  |                   | <0.100          | 0.005          |               | <0.1         |                |                |                | 3.43            |                 |                              |
| 1663          | 7/10/2010   | Kitchen Faucet             | Upland               |                                                      |                                  |                   | < .1            | 0.004          | 0.028         | < .1         |                |                |                | 4.7             |                 |                              |
| 1664          | 7/10/2010   | Pressure Tank              | Upland               |                                                      |                                  |                   | <0.1            | <0.003         | 0.088         | <0.1         |                |                |                | 3.55            |                 |                              |
| 1665          | 7/11/2010   | Kitchen Faucet             | Upland               |                                                      |                                  |                   | < .1            | < .003         | 0.183         | < .1         |                |                |                | 5.3             |                 |                              |
| 1666          | 7/12/2010   | Kitchen Faucet             | Valley               |                                                      |                                  |                   | < .1            | < .003         | 1.13          | < .1         |                |                |                | 3.4             |                 |                              |
| 1667          | 7/13/2010   | Basement (Pre-Filter)      | Valley               | Yes                                                  |                                  |                   | < .1            | 0.003          | 0.113         | < .1         |                |                |                | 3.56            |                 |                              |
| 1668          | 7/13/2010   | Kitchen Sink               | Valley               |                                                      |                                  |                   | <0.1            | <0.003         | 0.07          | <0.1         |                |                |                | 2.25            |                 |                              |
| 1669          | 7/13/2010   | Deep Well                  | Valley               |                                                      |                                  |                   | < .1            | < .003         | 0.71          | 0.122        |                |                |                | 28.8            |                 |                              |



Table S.8. Groundwater Quality Data for 1701 "Pre-Drill" Water Well Samples from Susquehanna County, Pennsylvania

| Water Well ID | Sample Date | Sampling Port   | Topographic Location | Gas Extraction Area (Within 1 km of Active Gas Well) | Groundwater Type (If Determined) | Alkalinity (mg/L) | Aluminum (mg/L) | Arsenic (mg/L) | Barium (mg/L) | Boron (mg/L) | Bromide (mg/L) | Cadmium (mg/L) | Calcium (mg/L) | Chloride (mg/L) | Chromium (mg/L) | Conductivity - Field (µs/cm) |
|---------------|-------------|-----------------|----------------------|------------------------------------------------------|----------------------------------|-------------------|-----------------|----------------|---------------|--------------|----------------|----------------|----------------|-----------------|-----------------|------------------------------|
| 1670          | 7/28/2010   | Kitchen Faucet  | Valley               |                                                      |                                  |                   | < .1            | < .003         | 0.177         | < .1         |                |                |                | 3.29            |                 |                              |
| 1671          | 7/28/2010   | Milkhouse Sink  | Upland               | Yes                                                  |                                  |                   | <0.1            | <0.003         | 0.0969        |              |                |                |                | 3.65            |                 |                              |
| 1672          | 8/7/2010    | Kitchen Sink    | Upland               |                                                      |                                  |                   | <0.10           | <0.003         | 0.128         | <0.1         |                |                |                | 9.24            |                 |                              |
| 1673          | 8/8/2010    | Kitchen Sink    | Upland               |                                                      |                                  |                   | <0.1            | <0.003         | <0.025        | <0.1         |                |                |                | 3.11            |                 |                              |
| 1674          | 8/13/2010   | Outside Hydrant | Valley               |                                                      |                                  |                   | < .1            | < .003         | < .025        | < .1         |                |                |                | 13.9            |                 |                              |
| 1675          | 8/19/2010   | Kitchen Faucet  | Valley               | Yes                                                  |                                  | 25                |                 |                |               |              |                |                |                | 21.8            |                 |                              |
| 1676          | 9/23/2010   | Outside Spigot  | Upland               |                                                      | Calcium-Sodium-Bicarbonate       | 125               | <0.1            | <0.003         | 1.68          |              |                | <0.002         | 25.2           | 4.88            | <0.005          |                              |
| 1677          | 10/10/2010  |                 | Valley               | Yes                                                  |                                  |                   | <0.05           | <0.002         | 0.107         |              |                | <0.002         | 21.9           | 37.8            | <0.005          |                              |
| 1678          | 10/18/2010  | Kitchen Sink    | Valley               | Yes                                                  |                                  | 75                | <0.05           | <0.003         | 0.086         |              |                | <0.002         | 41.4           |                 | <0.005          |                              |
| 1679          | 10/18/2010  | Kitchen Faucet  | Upland               | Yes                                                  |                                  | 145               |                 |                |               |              |                |                |                | 20              |                 |                              |
| 1680          | 10/19/2010  | Kitchen Faucet  | Valley               | Yes                                                  |                                  | 65                |                 |                |               |              |                |                |                | 31.5            |                 |                              |
| 1681          | 10/26/2010  | Spring House    | Valley               | Yes                                                  |                                  | 40                | <0.05           | <0.003         | 0.059         |              |                | <0.002         | 19.6           | 4.7             | <0.005          |                              |
| 1682          | 10/29/2010  | Kitchen Faucet  | Upland               |                                                      | Calcium-Bicarbonate              | 125               | <0.05           | <0.003         | 0.092         |              |                | <0.002         | 41.2           | 4.41            | <0.005          |                              |
| 1683          | 10/29/2010  | Kitchen Faucet  | Upland               |                                                      | Calcium-Bicarbonate              | 145               | <0.05           | <0.003         | 0.094         |              |                | <0.002         | 54.7           | 12              | <0.005          |                              |
| 1684          | 11/11/2010  | Kitchen Faucet  | Valley               | Yes                                                  |                                  | 190               |                 |                |               |              |                |                |                | 19.4            |                 |                              |
| 1685          | 11/11/2010  | Kitchen Faucet  | Upland               |                                                      |                                  | 130               |                 |                |               |              |                |                |                | 6.59            |                 |                              |
| 1686          | 11/11/2010  | Kitchen Faucet  | Upland               | Yes                                                  | Calcium-Bicarbonate              | 155               | <0.01           | <0.001         | 0.1           |              |                | <0.00010       | 41             | 4.48            | <0.002          |                              |
| 1687          | 12/2/2010   | Kitchen Sink    | Valley               |                                                      | Calcium-Bicarbonate              | 110               | <0.05           | <0.003         | <0.025        |              |                | <0.002         | 43.4           | 17.8            | <0.005          |                              |
| 1688          | 12/4/2010   | Kitchen Sink    | Valley               |                                                      |                                  | 30                | <0.05           | <0.003         | 0.036         |              |                | <0.002         | 11.1           |                 | <0.005          |                              |
| 1689          | 12/5/2010   | Kitchen Faucet  | Valley               | Yes                                                  |                                  | 140               |                 |                |               |              |                |                |                | 3.58            |                 |                              |
| 1690          | 12/9/2010   | Kitchen Faucet  | Upland               |                                                      |                                  | 125               |                 |                |               |              |                |                |                | 2.08            |                 |                              |
| 1691          | 12/11/2010  | Kitchen Sink    | Valley               |                                                      |                                  | 60                |                 |                |               |              |                |                |                | <2              |                 |                              |
| 1692          | 12/14/2010  | Kitchen Sink    | Upland               | Yes                                                  | Calcium-Bicarbonate-Chloride     | 30                | 0.017           | <0.001         | 0.069         |              |                | 0              | 14             | 7.1             | <0.002          |                              |
| 1693          | 12/14/2010  | Kitchen Faucet  | Upland               | Yes                                                  |                                  | 115               | <0.01           | 0.0014         | 0.093         |              |                | 0              | 40             |                 | 0               |                              |
| 1694          | 12/18/2010  | Kitchen Faucet  | Valley               | Yes                                                  |                                  | 195               |                 |                |               |              |                |                |                | 2.87            |                 |                              |

Table S.8. Groundwater Quality Data for 1701 "Pre-Drill" Water Well Samples from Susquehanna County, Pennsylvania

| Water Well ID | Sample Date | Sampling Port            | Topographic Location | Gas Extraction Area (Within 1 km of Active Gas Well) | Groundwater Type (If Determined) | Alkalinity (mg/L) | Aluminum (mg/L) | Arsenic (mg/L) | Barium (mg/L) | Boron (mg/L) | Bromide (mg/L) | Cadmium (mg/L) | Calcium (mg/L) | Chloride (mg/L) | Chromium (mg/L) | Conductivity - Field (µs/cm) |
|---------------|-------------|--------------------------|----------------------|------------------------------------------------------|----------------------------------|-------------------|-----------------|----------------|---------------|--------------|----------------|----------------|----------------|-----------------|-----------------|------------------------------|
| 1695          | 10/29/2009  | Pressure Tank            | Upland               | Yes                                                  |                                  |                   | < .1            |                | 0.255         |              |                |                |                | 100             |                 |                              |
| 1696          | 11/6/2010   | Kitchen Faucet           | Upland               |                                                      | Sodium-Bicarbonate               | 110               | < .01           | < .001         | < .002        |              |                | < .0001        | < .5           | 7.55            | < .002          |                              |
| 1697          | 3/19/2009   |                          | Upland               | Yes                                                  |                                  |                   | < .05           |                | 0.187         |              |                |                |                | 8.03            |                 |                              |
| 1698          | 3/25/2009   |                          | Upland               |                                                      |                                  |                   | <0.05           |                | 0.093         |              |                |                |                | 4.99            |                 |                              |
| 1699          | 3/12/2009   |                          | Upland               |                                                      |                                  |                   | <0.05           |                | 0.079         |              |                |                |                | 9.19            |                 |                              |
| 1700          | 4/5/2010    | Kitchen Sink, Main House | Upland               |                                                      |                                  |                   | <0.100          | <0.003         | 0.131         | <0.100       |                |                |                | 5.4             |                 |                              |
| 1701          | 6/2/2011    |                          | Valley               |                                                      | Calcium-Sodium-Bicarbonate       | 150               | < .03           | 0.0023         | 0.16          |              | < .02          | < .001         | 36             | 2               | < .002          |                              |

Table S.8. Groundwater Quality Data for 1701 "Pre-Drill" Water Well Samples from Susquehanna County, Pennsylvania

| Water Well ID | Sample Date | Sampling Port                      | Topographic Location | Gas Extraction Area (Within 1 km of Active Gas Well) | Dissolved Oxygen - Field (mg/L) | Ethane ug/L | Hardness (mg/L) | Iron (mg/L) | Lead (mg/L) | Magnesium (mg/L) | Manganese (mg/L) | Mercury (mg/L) | Methane ug/L | Nitrate as N (mg/L) | Oil Grease (mg/L) | pH - Field (SU) | Potassium (mg/L) |
|---------------|-------------|------------------------------------|----------------------|------------------------------------------------------|---------------------------------|-------------|-----------------|-------------|-------------|------------------|------------------|----------------|--------------|---------------------|-------------------|-----------------|------------------|
| 1             | 6/3/2011    |                                    | Valley               |                                                      |                                 | <26         | 47              | 0.05        | <0.001      | 2.3              | <0.0005          | <0.0002        | <26          | 1.2                 | <4.7              |                 | 0.93             |
| 2             | 5/27/2010   | Pressure Tank                      | Valley               |                                                      | 10.42                           | 5.7         |                 |             |             |                  |                  |                | 17000        |                     |                   | 7.67            |                  |
| 3             | 6/29/2011   |                                    | Upland               |                                                      | 3.21                            | <26         | 93              | 0.12        | <0.001      | 5.1              | 0.0092           | <0.0002        | <26          | 0.88                |                   | 8.16            | 0.96             |
| 4             | 6/29/2011   |                                    | Upland               |                                                      |                                 | < 26        | 23              | 2.9         | 0.0018      | 1.9              | 0.049            | < .0002        | < 26         | < .05               |                   |                 | 0.93             |
| 5             | 6/17/2010   | Outside Spigot                     | Upland               | Yes                                                  | 5.53                            |             |                 |             |             |                  |                  |                | 0.11         |                     |                   | 6.33            |                  |
| 6             | 6/17/2010   | Kitchen Sink                       | Valley               |                                                      | 8.07                            |             |                 |             |             |                  |                  |                | 0.11         |                     |                   | 6.3             |                  |
| 7             | 6/17/2010   | Kitchen Sink                       | Upland               |                                                      | 10.55                           |             |                 |             |             |                  |                  |                | 0.23         |                     |                   | 6.9             |                  |
| 8             | 4/10/2010   | Pressure Tank                      | Upland               |                                                      | 12.18                           |             |                 | < .05       |             | 1.86             | < .025           |                | 1.8          |                     |                   | 5.98            |                  |
| 9             | 4/10/2010   | Basement At Pressure Tank          | Upland               |                                                      | 5.14                            |             |                 | < .05       |             | 7.92             | < .025           |                | 0.91         |                     |                   | 7.31            |                  |
| 10            | 4/10/2010   | Pressure Tank                      | Valley               |                                                      | 8.05                            |             |                 | < .05       |             | 4.87             | < .025           |                | 0.39         |                     |                   | 6.85            |                  |
| 11            | 4/11/2010   | Outside Hydrant Directly From Well | Upland               |                                                      | 5.12                            |             |                 | < .05       |             | 4.65             | < .025           |                | 1.7          |                     |                   | 6.55            |                  |
| 12            | 4/11/2010   |                                    | Valley               |                                                      |                                 |             |                 | < .05       |             | 5.06             | < .025           |                | 0.3          |                     |                   |                 |                  |
| 13            | 4/11/2010   | Kitchen Sink                       | Valley               |                                                      | 3.48                            |             |                 | < .05       |             | 1.18             | 0.042            |                | 1400         |                     |                   | 7.49            |                  |
| 14            | 4/11/2010   | Kitchen Sink                       | Upland               | Yes                                                  | 4.2                             |             |                 | < .05       |             | 6.52             | < .025           |                | < .1         |                     |                   | 7.51            |                  |
| 15            | 4/11/2010   | Pressures Tank                     | Upland               |                                                      | 8.6                             |             |                 | < .05       |             | 9.37             | < .025           |                | 0.71         |                     |                   | 6.81            |                  |
| 16            | 4/11/2010   | Kitchen Sink                       | Valley               |                                                      | 3.4                             |             |                 | < .05       |             | 1.86             | < .025           |                | 1300         |                     |                   | 8.74            |                  |
| 17            | 4/11/2010   | Kitchen Sink                       | Upland               |                                                      |                                 |             |                 | < .05       |             | 8.58             | 0.086            |                | 28           |                     |                   |                 |                  |
| 18            | 4/11/2010   | Outside Hydrant Direct From Well   | Upland               |                                                      |                                 |             |                 | < .05       |             | 7.92             | 0.095            |                | 230          |                     |                   |                 |                  |
| 19            | 4/15/2010   | Outside Hydrant                    | Upland               |                                                      |                                 | < .025      |                 | < .05       |             | 6.54             | < .025           |                | 1.4          |                     |                   |                 |                  |
| 20            | 4/15/2010   | Kitchen Sink                       | Upland               |                                                      |                                 | < .025      |                 | < .05       |             | 5.73             | < .025           |                | 3.2          |                     |                   |                 |                  |
| 21            | 4/15/2010   | Outside Hydrant                    | Valley               |                                                      |                                 |             |                 | < .05       |             | 5.81             | < .025           |                | 0.79         |                     |                   |                 |                  |
| 22            | 4/15/2010   | Pressure Tank                      | Valley               |                                                      |                                 |             |                 | < .05       |             | 5.3              | < .025           |                | 0.16         |                     |                   |                 |                  |
| 23            | 4/19/2010   | Laundry Room Sink                  | Upland               |                                                      |                                 |             |                 | < .05       |             | 5.05             | < .025           |                | < .1         |                     |                   |                 |                  |

Table S.8. Groundwater Quality Data for 1701 "Pre-Drill" Water Well Samples from Susquehanna County, Pennsylvania

| Water Well ID | Sample Date | Sampling Port             | Topographic Location | Gas Extraction Area (Within 1 km of Active Gas Well) | Dissolved Oxygen - Field (mg/L) | Ethane ug/L | Hardness (mg/L) | Iron (mg/L) | Lead (mg/L) | Magnesium (mg/L) | Manganese (mg/L) | Mercury (mg/L) | Methane ug/L | Nitrate as N (mg/L) | Oil Grease (mg/L) | pH - Field (SU) | Potassium (mg/L) |
|---------------|-------------|---------------------------|----------------------|------------------------------------------------------|---------------------------------|-------------|-----------------|-------------|-------------|------------------|------------------|----------------|--------------|---------------------|-------------------|-----------------|------------------|
| 24            | 4/19/2010   | Hydrant At Well Head      | Valley               |                                                      |                                 |             |                 | < .05       |             | 10               | < .025           |                | 14           |                     |                   |                 |                  |
| 25            | 4/19/2010   | Diversion Ditch           | Upland               | Yes                                                  |                                 |             |                 | 0.353       |             | 2.63             | 0.086            |                | 1.2          |                     |                   |                 |                  |
| 26            | 4/22/2010   | Kitchen Sink              | Valley               |                                                      |                                 |             |                 | < .05       |             | 12.4             | < .025           |                | 2.9          |                     |                   |                 |                  |
| 27            | 4/22/2010   | Kitchen Sink              | Upland               | Yes                                                  |                                 |             |                 | < .05       |             | 7.52             | < .025           |                | 57           |                     |                   |                 |                  |
| 28            | 4/22/2010   | Basement Sink             | Upland               |                                                      |                                 |             |                 | < .05       |             | 6.54             | < .025           |                | 0.32         |                     |                   |                 |                  |
| 29            | 6/24/2010   | Pond                      | Upland               |                                                      | 8.9                             |             |                 |             |             |                  |                  |                | 68           |                     |                   | 7.06            |                  |
| 30            | 6/24/2010   | Pressure Tank             | Upland               |                                                      | 8.76                            |             |                 |             |             |                  |                  |                | 0.14         |                     |                   | 7.16            |                  |
| 31            | 5/14/2011   |                           | Upland               |                                                      | 0.55                            | < 26        | 130             | 0.5         | 0.0012      | 7.2              | 4.1              | < .0002        | < 26         | 0.29                |                   | 6.77            | 0.98             |
| 32            | 6/24/2010   | Kitchen Sink              | Valley               |                                                      | 1.71                            |             |                 |             |             |                  |                  |                | 18000        |                     |                   | 7.45            |                  |
| 33            | 6/24/2010   | Outside Spigot            | Upland               |                                                      | 9.52                            | < .025      |                 | < .05       |             | 3.57             | < .025           |                | 0.12         |                     |                   | 6.89            |                  |
| 34            | 4/25/2010   | Bathroom Faucet           | Upland               | Yes                                                  | 10.04                           |             |                 | < .05       |             | 2.96             | < .025           |                | 0.62         |                     |                   | 6.76            |                  |
| 35            | 4/25/2010   |                           | Upland               | Yes                                                  |                                 |             |                 | 0.098       |             | 5.27             | 0.059            |                | 0.37         |                     |                   |                 |                  |
| 36            | 4/24/2010   | Outside Spigot            | Valley               |                                                      |                                 |             |                 | < .05       |             | 15.5             | < .025           |                | 0.77         |                     |                   |                 |                  |
| 37            | 4/24/2010   | Kitchen Sink              | Upland               | Yes                                                  | 10.14                           |             |                 | < .05       |             | 2.01             | < .025           |                | 0.79         |                     |                   | 6.37            |                  |
| 38            | 4/24/2010   |                           | Upland               |                                                      |                                 |             |                 | < .05       |             | 6.26             | < .025           |                | 0.24         |                     |                   |                 |                  |
| 39            | 4/24/2010   | Kitchen Bar Sink          | Upland               |                                                      |                                 |             |                 | < .05       |             | 12.3             | < .025           |                | 0.31         |                     |                   |                 |                  |
| 40            | 4/24/2010   | Outside Spigot            | Upland               |                                                      |                                 |             |                 | < .05       |             | 5.28             | < .025           |                | 1            |                     |                   |                 |                  |
| 41            | 4/24/2010   | Outside Spigot            | Upland               |                                                      |                                 |             |                 | < .05       |             | 6.14             | < .025           |                | 0.3          |                     |                   |                 |                  |
| 42            | 4/29/2010   | Outside Spigot            | Upland               |                                                      |                                 |             |                 | < .05       |             | 6.31             | < .025           |                | < .1         |                     |                   |                 |                  |
| 43            | 4/29/2010   | Spring Culvert            | Upland               |                                                      |                                 |             |                 | < .05       |             | 1.23             | < .025           |                | 0.74         |                     |                   |                 |                  |
| 44            | 4/29/2010   | Basement At Pressure Tank | Valley               |                                                      |                                 |             |                 | < .05       |             | 5.79             | < .025           |                | 0.2          |                     |                   |                 |                  |
| 45            | 7/2/2010    | Kitchen Sink              | Valley               |                                                      | 2.59                            | < .025      |                 |             |             |                  |                  |                | 16           |                     |                   | 7.61            |                  |
| 46            | 7/2/2010    | Bathroom Sink             | Valley               |                                                      | 5.31                            | < .025      |                 |             |             |                  |                  |                | < .1         |                     |                   | 7.15            |                  |
| 47            | 7/2/2010    | Kitchen Sink              | Valley               |                                                      | 25.6                            | < .025      |                 |             |             |                  |                  |                | 0.28         |                     |                   | 7.19            |                  |
| 48            | 7/2/2010    | Kitchen Sink              | Valley               |                                                      | 4.88                            | < .025      |                 |             |             |                  |                  |                | 0.22         |                     |                   | 7.37            |                  |
| 49            | 7/2/2010    | Kitchen Sink              | Upland               |                                                      | 5.53                            | < .025      |                 |             |             |                  |                  |                | 0.19         |                     |                   | 6.95            |                  |

Table S.8. Groundwater Quality Data for 1701 "Pre-Drill" Water Well Samples from Susquehanna County, Pennsylvania

| Water Well ID | Sample Date | Sampling Port                   | Topographic Location | Gas Extraction Area (Within 1 km of Active Gas Well) | Dissolved Oxygen - Field (mg/L) | Ethane ug/L | Hardness (mg/L) | Iron (mg/L) | Lead (mg/L) | Magnesium (mg/L) | Manganese (mg/L) | Mercury (mg/L) | Methane ug/L | Nitrate as N (mg/L) | Oil Grease (mg/L) | pH - Field (SU) | Potassium (mg/L) |
|---------------|-------------|---------------------------------|----------------------|------------------------------------------------------|---------------------------------|-------------|-----------------|-------------|-------------|------------------|------------------|----------------|--------------|---------------------|-------------------|-----------------|------------------|
| 50            | 7/2/2010    | Kitchen Sink                    | Upland               |                                                      | 6.93                            | < .025      |                 |             |             |                  |                  |                | < .1         |                     |                   | 7.15            |                  |
| 51            | 7/2/2010    | Kitchen Sink                    | Valley               |                                                      | 6.46                            | < .025      |                 |             |             |                  |                  |                | 0.36         |                     |                   | 7.04            |                  |
| 52            | 7/6/2010    | Kitchen Sink                    | Upland               |                                                      | 6.55                            | < .025      |                 | < .05       |             | 4.33             | < .025           |                | < .1         |                     |                   | 7.61            |                  |
| 53            | 7/6/2010    | Garage                          | Valley               |                                                      | 8.21                            | < .025      |                 | < .05       |             | 6.91             | 0.294            |                | 38           |                     |                   | 7.8             |                  |
| 54            | 7/6/2010    | Kitchen Sink                    | Valley               |                                                      | 8.9                             | < .025      |                 | < .05       |             | 2.71             | < .025           |                | < .1         |                     |                   | 7.55            |                  |
| 55            | 7/6/2010    | Kitchen Sink                    | Upland               |                                                      | 6.38                            | < .025      |                 | < .05       |             | < 1              | < .025           |                | 2.9          |                     |                   | 7.77            |                  |
| 56            | 7/6/2010    | Kitchen Sink                    | Valley               |                                                      | 1.76                            | 1.8         |                 | < .05       |             | 4.53             | 0.025            |                | 9500         |                     |                   | 7.01            |                  |
| 57            | 7/6/2010    |                                 | Valley               |                                                      |                                 | < .025      |                 | < .05       |             | 3.67             | < .025           |                | 3.2          |                     |                   |                 |                  |
| 58            | 7/6/2010    | Kitchen Sink                    | Valley               |                                                      | 5.41                            | < .025      |                 | < .05       |             | 3.97             | < .025           |                | 0.63         |                     |                   | 8.06            |                  |
| 59            | 7/6/2010    | Basement At Pressure Tank       | Valley               |                                                      | 6.08                            | < .025      |                 | < .05       |             | 2.58             | < .025           |                | 39           |                     |                   | 5.58            |                  |
| 60            | 7/6/2010    |                                 | Upland               |                                                      |                                 | < .025      |                 | < .05       |             | 2.54             | < .025           |                | 0.11         |                     |                   |                 |                  |
| 61            | 7/7/2010    | Kitchen Sink                    | Valley               |                                                      | 5.64                            | < .025      |                 | < .05       |             | 6.01             | < .025           |                | 0.74         |                     |                   | 6.73            |                  |
| 62            | 7/7/2010    | Spring Head                     | Valley               |                                                      | 6.08                            | < .025      |                 | < .05       |             | 2.21             | < .025           |                | 1.1          |                     |                   | 5.95            |                  |
| 63            | 7/7/2010    | Kitchen Sink                    | Valley               |                                                      | 7.89                            | 0.071       |                 | 0.072       |             | 2.66             | 0.052            |                | 140          |                     |                   | 6.35            |                  |
| 64            | 7/7/2010    | Kitchen Sink                    | Valley               |                                                      | 5.14                            | < .025      |                 | < .05       |             | 4.21             | < .025           |                | 0.18         |                     |                   | 7.55            |                  |
| 65            | 7/7/2010    | Kitchen Sink                    | Valley               |                                                      | 7.89                            | < .025      |                 | < .05       |             | 3.68             | < .025           |                | 0.11         |                     |                   | 6.49            |                  |
| 66            | 7/7/2010    | Basement Pressure Tank          | Valley               |                                                      | 4.13                            | < .025      |                 | < .05       |             | 4.74             | < .025           |                | 19           |                     |                   | 5.92            |                  |
| 67            | 7/7/2010    | Kitchen Sink                    | Valley               |                                                      | 1.77                            | 0.075       |                 | < .05       |             | 6.13             | < .025           |                | 610          |                     |                   | 6.51            |                  |
| 68            | 7/8/2010    | Basement Sink                   | Valley               |                                                      | 3.14                            | < .025      |                 | < .05       |             | 6.59             | < .025           |                | 1.1          |                     |                   | 8.15            |                  |
| 69            | 7/8/2010    | Kitchen Sink                    | Upland               |                                                      | 4.15                            | < .025      |                 | < .05       |             | 5.73             | < .025           |                | 0.12         |                     |                   | 8.01            |                  |
| 70            | 7/8/2010    | Kitchen Sink                    | Valley               |                                                      | 2.98                            | < .025      |                 | < .05       |             | 6.39             | < .025           |                | 3.4          |                     |                   | 7.73            |                  |
| 71            | 7/9/2010    | Kitchen Sink                    | Valley               |                                                      | 2.13                            | < .025      |                 | < .05       |             | 7.11             | < .025           |                | 0.16         |                     |                   | 7.04            |                  |
| 72            | 7/9/2010    | Kitchen Sink - Debonis Property | Valley               |                                                      | 8.22                            | < .025      |                 | < .05       |             | 3.76             | < .025           |                | 0.23         |                     |                   | 6.37            |                  |
| 73            | 7/7/2010    | Kitchen Sink                    | Valley               |                                                      | 2.54                            | < .025      |                 | < .05       |             | 4.91             | < .025           |                | 0.81         |                     |                   | 8.09            |                  |
| 74            | 7/7/2010    | Outside Garage Spigot           | Valley               |                                                      | 8.48                            | < .025      |                 | < .05       |             | 3.15             | < .025           |                | 0.15         |                     |                   | 8.04            |                  |

Table S.8. Groundwater Quality Data for 1701 "Pre-Drill" Water Well Samples from Susquehanna County, Pennsylvania

| Water Well ID | Sample Date | Sampling Port | Topographic Location | Gas Extraction Area (Within 1 km of Active Gas Well) | Dissolved Oxygen - Field (mg/L) | Ethane ug/L | Hardness (mg/L) | Iron (mg/L) | Lead (mg/L) | Magnesium (mg/L) | Manganese (mg/L) | Mercury (mg/L) | Methane ug/L | Nitrate as N (mg/L) | Oil Grease (mg/L) | pH - Field (SU) | Potassium (mg/L) |
|---------------|-------------|---------------|----------------------|------------------------------------------------------|---------------------------------|-------------|-----------------|-------------|-------------|------------------|------------------|----------------|--------------|---------------------|-------------------|-----------------|------------------|
| 75            | 7/8/2010    | Kitchen Sink  | Valley               |                                                      |                                 | < .025      |                 | < .05       |             | 2.37             | < .025           |                | 0.12         |                     |                   |                 |                  |
| 76            | 7/7/2010    | Kitchen Sink  | Valley               |                                                      | 2.93                            | < .025      |                 | < .05       |             | 6.48             | < .025           |                | 0.7          |                     |                   | 7.7             |                  |
| 77            | 7/7/2010    | Kitchen Sink  | Valley               |                                                      | 6.8                             | < .025      |                 | < .05       |             | 2.02             | < .025           |                | < .1         |                     |                   | 7.55            |                  |
| 78            | 7/8/2010    | Kitchen Sink  | Valley               |                                                      | 6.25                            | 0.06        |                 | < .05       |             | 5.02             | 0.054            |                | 440          |                     |                   | 6.83            |                  |
| 79            | 7/8/2010    | Kitchen Sink  | Upland               |                                                      | 8.28                            | < .025      |                 | < .05       |             | 6.1              | < .025           |                | 0.6          |                     |                   | 7.3             |                  |
| 80            | 7/8/2010    | Kitchen Sink  | Valley               |                                                      | 6.46                            | 0.029       |                 | < .05       |             | 6.04             | < .025           |                | 1.4          |                     |                   | 7.3             |                  |
| 81            | 7/8/2010    | Kitchen Sink  | Valley               |                                                      | 11.35                           | < .025      |                 | < .05       |             | 5.88             | < .025           |                | 0.26         |                     |                   | 7.31            |                  |
| 82            | 7/9/2010    |               | Valley               | Yes                                                  |                                 | < .025      |                 | < .05       |             | 3.76             | < .025           |                | 0.12         |                     |                   |                 |                  |
| 83            | 7/9/2010    | Kitchen Sink  | Valley               |                                                      | 2.49                            | < .025      |                 | < .05       |             | 6.26             | < .025           |                | 0.33         |                     |                   | 6.49            |                  |
| 84            | 7/9/2010    | Kitchen Sink  | Valley               |                                                      | 2.87                            | < .025      |                 | < .05       |             | 6.88             | < .025           |                | 0.44         |                     |                   | 8.25            |                  |
| 85            | 7/9/2010    | Kitchen Sink  | Upland               |                                                      | 2.63                            | < .025      |                 | < .05       |             | 4.87             | < .025           |                | 0.12         |                     |                   | 7.64            |                  |
| 86            | 7/9/2010    | Kitchen Sink  | Valley               |                                                      | 0.52                            | < .025      |                 | < .05       |             | 3.57             | 0.026            |                | 4.5          |                     |                   | 8.08            |                  |
| 87            | 7/9/2010    |               | Valley               |                                                      |                                 | < .025      |                 | < .05       |             | 2.34             | < .025           |                | 0.34         |                     |                   |                 |                  |
| 88            | 7/10/2010   |               | Valley               |                                                      |                                 | 7.2         |                 | < .05       |             | 10.6             | 0.09             |                | 17000        |                     |                   |                 |                  |
| 89            | 7/8/2010    | Pressure Tank | Upland               |                                                      | 7.12                            |             |                 | < .05       |             | 4.22             | < .025           |                | < .1         |                     |                   | 7.07            |                  |
| 90            | 5/20/2010   | Kitchen Sink  | Valley               |                                                      | 3.07                            |             |                 | < .05       |             | 10.9             | 0.096            |                | 7.3          |                     |                   | 7.2             |                  |
| 91            | 7/11/2010   | Kitchen Sink  | Valley               |                                                      | 1.35                            | < .025      |                 | < .05       |             | 6.27             | < .025           |                | 1.3          |                     |                   | 7.6             |                  |
| 92            | 7/11/2010   | Barn Hose     | Valley               |                                                      |                                 | <0.025      |                 | 0.106       |             | 3.24             | <0.025           |                | 12           |                     |                   |                 |                  |
| 93            | 7/8/2010    | Kitchen Sink  | Upland               | Yes                                                  | 6.38                            | < .025      |                 | < .05       |             | 6.89             | < .025           |                | < .1         |                     |                   | 7.42            |                  |
| 94            | 4/8/2009    |               | Upland               |                                                      |                                 | <0.025      |                 | <0.05       |             | 8.3              | <0.025           |                | 1.9          |                     | <5                | 7.61            |                  |
| 95            | 7/9/2010    |               | Valley               |                                                      |                                 | < .025      |                 | < .05       |             | 4.04             | < .025           |                | 0.34         |                     |                   |                 |                  |
| 96            | 7/10/2010   | Kitchen Sink  | Valley               |                                                      | 2.33                            | < .025      |                 | < .05       |             | 6.99             | < .025           |                | 0.17         |                     |                   | 7.74            |                  |
| 97            | 7/10/2010   | Kitchen Sink  | Upland               |                                                      | 1                               | < .025      |                 | < .05       |             | 1.21             | 0.757            |                | 610          |                     |                   | 6.2             |                  |
| 98            | 7/12/2010   | Artesian Well | Valley               |                                                      |                                 | < .025      |                 | < .05       |             | 3.19             | < .025           |                | 3            |                     |                   |                 |                  |
| 99            | 7/12/2010   |               | Valley               |                                                      |                                 | 4.9         |                 | < .05       |             | 2.96             | < .025           |                | 13000        |                     |                   |                 |                  |
| 100           | 7/12/2010   | Kitchen Sink  | Valley               |                                                      | 0.27                            | 17          |                 | < .05       |             | 4.81             | 0.279            |                | 25000        |                     |                   | 7.73            |                  |
| 101           | 7/12/2010   |               | Valley               |                                                      |                                 | 15          |                 | < .05       |             | 7.37             | 0.04             |                | 27000        |                     |                   |                 |                  |
| 102           | 7/12/2010   |               | Valley               |                                                      |                                 | < .025      |                 | < .05       |             | 6.29             | < .025           |                | < .1         |                     |                   |                 |                  |
| 103           | 7/11/2010   | Kitchen Sink  | Valley               | Yes                                                  | 0.87                            | 13          |                 | < .05       |             | 6.15             | 0.066            |                | 22000        |                     |                   | 8.46            |                  |

Table S.8. Groundwater Quality Data for 1701 "Pre-Drill" Water Well Samples from Susquehanna County, Pennsylvania

| Water Well ID | Sample Date | Sampling Port  | Topographic Location | Gas Extraction Area (Within 1 km of Active Gas Well) | Dissolved Oxygen - Field (mg/L) | Ethane ug/L | Hardness (mg/L) | Iron (mg/L) | Lead (mg/L) | Magnesium (mg/L) | Manganese (mg/L) | Mercury (mg/L) | Methane ug/L | Nitrate as N (mg/L) | Oil Grease (mg/L) | pH - Field (SU) | Potassium (mg/L) |
|---------------|-------------|----------------|----------------------|------------------------------------------------------|---------------------------------|-------------|-----------------|-------------|-------------|------------------|------------------|----------------|--------------|---------------------|-------------------|-----------------|------------------|
| 104           | 7/12/2010   | Kitchen Sink   | Valley               |                                                      |                                 | < .025      |                 | < .05       |             | 2.92             | < .025           |                | 0.29         |                     |                   |                 |                  |
| 105           | 7/13/2010   |                | Upland               |                                                      |                                 | < .025      |                 | < .05       |             | 7.73             | < .025           |                | 0.75         |                     |                   |                 |                  |
| 106           | 7/12/2010   | Kitchen Sink   | Valley               |                                                      |                                 | 11          |                 | < .05       |             | 1.31             | < .025           |                | 24000        |                     |                   |                 |                  |
| 107           | 7/17/2010   | Kitchen Sink   | Valley               |                                                      | 2.84                            | < .025      |                 | < .05       |             | 6.27             | 0.075            |                | 11           |                     |                   | 7.73            |                  |
| 108           | 7/17/2010   | Kitchen Sink   | Valley               |                                                      | 5.37                            | < .025      |                 | < .05       |             | 6.55             | < .025           |                | 0.86         |                     |                   | 7.5             |                  |
| 109           | 7/17/2010   | Kitchen Sink   | Valley               |                                                      | 6.8                             | < .025      |                 | < .05       |             | 3.68             | < .025           |                | 0.28         |                     |                   | 7.09            |                  |
| 110           | 7/11/2010   |                | Upland               |                                                      |                                 | < .025      |                 | < .05       |             | 5.53             | 0.132            |                | 3.6          |                     |                   |                 |                  |
| 111           | 7/13/2010   | Kitchen Sink   | Valley               |                                                      |                                 | < .025      |                 | < .05       |             | 4.66             | < .025           |                | < .1         |                     |                   |                 |                  |
| 112           | 7/13/2010   | Kitchen Sink   | Valley               |                                                      |                                 | 0.028       |                 | < .05       |             | 5.25             | 0.042            |                | 85           |                     |                   |                 |                  |
| 113           | 7/12/2010   |                | Valley               |                                                      |                                 | < .025      |                 | < .05       |             | 4.43             | 0.087            |                | 0.63         |                     |                   |                 |                  |
| 114           | 7/25/2011   | Kitchen Sink   | Upland               |                                                      | 1.46                            | 1.3         |                 |             |             |                  |                  |                | 4300         |                     |                   | 7.89            |                  |
| 115           | 8/17/2011   | Bathroom Sink  | Valley               |                                                      | 2.29                            | 0.99        |                 |             |             |                  |                  |                | 6600         |                     |                   | 7.97            |                  |
| 116           | 7/5/2011    |                | Valley               |                                                      | 3.06                            | <0.025      |                 |             |             |                  |                  |                | 0.83         |                     |                   | 7.77            |                  |
| 117           | 3/12/2009   | Barn           | Valley               |                                                      | 4.72                            | 5.9         |                 | < .05       |             | 5.04             | 0.06             |                | 4200         | < 5                 |                   | 8.23            |                  |
| 118           | 2/20/2009   | Basement       | Upland               |                                                      | 10.64                           |             |                 | 0.108       |             | 2.27             | < .025           |                | 0.12         |                     |                   | 6.06            |                  |
| 119           | 7/1/2010    |                | Valley               |                                                      |                                 | < .025      |                 | < .05       |             | 2.65             | < .025           |                | 0.35         |                     |                   |                 |                  |
| 120           | 7/1/2010    |                | Upland               |                                                      |                                 | < .025      |                 | < .05       |             | 3.1              | < .025           |                | 0.92         |                     |                   |                 |                  |
| 121           | 2/20/2009   |                | Upland               |                                                      |                                 |             |                 | 0.212       |             | 5.79             | 1.9              |                | 0.99         |                     | < 5               |                 |                  |
| 122           | 8/3/2010    | Hand Dug Well  | Upland               |                                                      | 7.46                            | < .025      |                 | < .05       |             | 5.82             | < .025           |                | 0.22         |                     |                   | 5.69            |                  |
| 123           | 2/20/2009   | Basement       | Valley               |                                                      | 5                               |             |                 | 0.064       |             | 7.9              | 0.513            |                | 1.5          |                     |                   | 7.74            |                  |
| 124           | 8/7/2010    | Kitchen Sink   | Upland               |                                                      | 2.44                            | 0.12        |                 | < .05       |             | 9.82             | 0.067            |                | 430          |                     |                   | 7.48            |                  |
| 125           | 8/7/2010    | Hand Dug Well  | Upland               |                                                      | 4.61                            | < .025      |                 | < .05       |             | 3.58             | < .025           |                | 0.8          |                     |                   | 8.24            |                  |
| 126           | 8/8/2010    | Pressure Tank  | Valley               |                                                      |                                 | 0.006       |                 | 0.066       |             | 9.33             | 0.048            |                | 4.1          |                     |                   |                 |                  |
| 127           | 8/8/2010    | Kitchen Sink   | Valley               |                                                      | 3.19                            | 0.03        |                 | < .05       |             | < 1              | < .025           |                | 140          |                     |                   | 8.07            |                  |
| 128           | 8/8/2010    | Bathroom Sink  | Valley               |                                                      | 3.72                            | < .025      |                 | < .05       |             | < 1              | < .025           |                | 2            |                     |                   | 7.8             |                  |
| 129           | 8/8/2010    | Kitchen Sink   | Upland               |                                                      | 6.24                            | < .025      |                 | < .05       |             | 6.08             | < .025           |                | 0.12         |                     |                   | 6.62            |                  |
| 130           | 7/30/2010   | Bathroom Sink  | Valley               | Yes                                                  | 2.99                            | 11          |                 | < .05       |             | 6.21             | 0.094            |                | 16000        |                     |                   | 7.74            |                  |
| 131           | 8/13/2010   | Outside Spigot | Upland               |                                                      | 6.09                            | < .025      |                 | < .05       |             | 3.62             | < .025           |                | 0.3          |                     |                   | 7.17            |                  |
| 132           | 7/20/2010   | Kitchen Sink   | Valley               |                                                      | 5.69                            | < .025      |                 | < .05       |             | 8.59             | < .025           |                | 0.21         |                     |                   | 7.18            |                  |
| 133           | 7/20/2010   | Heefer Barn    | Upland               |                                                      | 5.04                            | < .025      |                 | < .05       |             | 12.7             | < .025           |                | 0.4          |                     |                   | 7.19            |                  |
| 134           | 8/11/2010   | House #2       | Valley               |                                                      | 2.08                            | < .025      |                 | < .05       |             | 1.54             | 0.039            |                | 38           |                     |                   | 7.43            |                  |
| 135           | 4/15/2009   |                | Upland               |                                                      |                                 | < .025      |                 | < .05       |             | 3.76             | < .025           |                | 0.35         |                     | < 5               |                 |                  |

Table S.8. Groundwater Quality Data for 1701 "Pre-Drill" Water Well Samples from Susquehanna County, Pennsylvania

| Water Well ID | Sample Date | Sampling Port             | Topographic Location | Gas Extraction Area (Within 1 km of Active Gas Well) | Dissolved Oxygen - Field (mg/L) | Ethane ug/L | Hardness (mg/L) | Iron (mg/L) | Lead (mg/L) | Magnesium (mg/L) | Manganese (mg/L) | Mercury (mg/L) | Methane ug/L | Nitrate as N (mg/L) | Oil Grease (mg/L) | pH - Field (SU) | Potassium (mg/L) |       |
|---------------|-------------|---------------------------|----------------------|------------------------------------------------------|---------------------------------|-------------|-----------------|-------------|-------------|------------------|------------------|----------------|--------------|---------------------|-------------------|-----------------|------------------|-------|
| 136           | 8/11/2010   | Main House Kitchen Sink   | Valley               |                                                      | 8.12                            | < .025      |                 | < .05       |             | 9.72             | < .025           |                | < .1         |                     |                   | 7.98            |                  |       |
| 137           | 8/19/2010   |                           | Upland               | Yes                                                  |                                 | < .025      | 106.4333        | < .05       | 0.005       | 4.32             | < .025           | < .0002        | 0.14         | < 1                 |                   |                 | 1.01             |       |
| 138           | 8/19/2010   | Barn Well Milkhouse Sink  | Upland               | Yes                                                  | 4.37                            | < .025      | 110.3356        | < .05       | < .001      | 4.54             | < .025           | < .0002        | 0.31         | < 1                 |                   |                 | 6.77             | 0.851 |
| 139           | 6/24/2009   | Basement Pressure Tank    | Valley               |                                                      | 10.71                           | < .025      |                 | 0.154       |             | 2.39             | < .025           |                | 2.2          |                     | < 5               |                 | 7.19             |       |
| 140           | 8/19/2010   | Pressure Tank             | Upland               |                                                      | 4.62                            | < .025      | 95.24654        | 0.052       | 0.02        | 3.18             | < .025           | < .0002        | 0.38         | < 1                 |                   |                 | 7.49             | 1.76  |
| 141           | 8/19/2010   | Kitchen Sink              | Upland               | Yes                                                  | 3.92                            | < .025      | 154.771         | < .05       | < .001      | 5.75             | < .025           | < .0002        | < .1         | < 1                 |                   |                 | 7.31             | 1.49  |
| 142           | 8/19/2010   | Spigot Under Mobile Home  | Upland               | Yes                                                  | 4.19                            | < .025      | 119.3432        | < .05       | < .001      | 4.12             | < .025           | < .0002        | 0.15         | < 1                 |                   |                 | 7.25             | 1.43  |
| 143           | 8/20/2010   | Laundry Room Sink         | Upland               |                                                      | 2.57                            | 10          | 73.81654        | < .05       | < .001      | 5.98             | < .025           | < .0002        | 16000        | < 1                 |                   |                 | 7.87             | 1.05  |
| 144           | 6/24/2009   | Well Head                 | Valley               |                                                      | 2.54                            | < .025      |                 | 0.122       |             | 3.07             | < .025           |                | 85           |                     | < 5               |                 | 8.86             |       |
| 145           | 6/24/2009   | Kitchen Sink              | Valley               |                                                      | 3.85                            | < .025      |                 | < .025      |             | 3.88             | < .025           |                | 0.13         |                     | < 5               |                 | 7.72             |       |
| 146           | 8/26/2010   | Outside Spigot            | Upland               |                                                      | 4.61                            | < .025      | 137.718         | < .05       | < .001      | 7.43             | 0.064            | < .0002        | 1.6          | < 1                 |                   |                 | 6.88             | 1.14  |
| 147           | 7/29/2010   |                           | Valley               |                                                      |                                 | < .025      |                 | < .05       |             | 15.4             | < .025           |                | 0.087        |                     |                   |                 |                  |       |
| 148           | 7/29/2010   | Kitchen Sink              | Upland               | Yes                                                  | 4.18                            | 0.034       |                 | 0.069       |             | 3.86             | 0.04             |                | 120          |                     |                   |                 | 7.23             |       |
| 149           | 8/28/2010   | Pressure Tank             | Valley               |                                                      | 5.48                            | < .025      | 154.1148        | < .05       | 0.001       | < 12.2           | < .025           | < .0002        | 0.22         | < 1                 |                   |                 | 7.11             | 1.4   |
| 150           | 8/28/2010   | Outside Spigot            | Valley               |                                                      | 4.34                            | < .025      | 131.8529        | 0.542       | < .001      | 5.46             | < .025           | < .0002        | 3.4          | < 1                 | < 5               |                 | 6.98             | 0.9   |
| 151           | 9/2/2010    | Kitchen Sink              | Upland               |                                                      | 3.15                            | < .025      | 162.0584        | < .05       | < .002      | 9.46             | < .025           | < .0002        | 1.9          | < 1                 |                   |                 | 6.97             | 1.4   |
| 152           | 6/13/2011   | Kitchen Sink              | Valley               |                                                      | 6.02                            | 0.03        |                 |             |             |                  |                  |                | 120          |                     |                   |                 | 7.14             |       |
| 153           | 9/10/2010   | Kitchen Faucet            | Valley               |                                                      | 9.5                             | < .025      | 52.2            | < .05       | < .09       | 3.27             | < .025           | < .0002        | 7.6          | < 1                 |                   |                 | 7.66             | 1.95  |
| 154           | 7/20/2010   | Tenant House Kitchen Sink | Upland               |                                                      | 3.18                            | < .025      |                 | < .05       |             | 9.16             | < .025           |                | 0.28         |                     |                   |                 | 7.28             |       |
| 155           | 2/27/2010   | Kitchen Sink              | Upland               |                                                      | 7.06                            | < .025      |                 | < .05       |             | 5.48             | < .025           |                | 0.2          |                     |                   |                 | 6.97             |       |
| 156           | 2/22/2010   | Basement At Pressure Tank | Valley               |                                                      | 3.39                            | < .025      |                 | 0.113       |             | 7.22             | 0.071            |                | 19           |                     |                   |                 | 7.97             |       |



Table S.8. Groundwater Quality Data for 1701 "Pre-Drill" Water Well Samples from Susquehanna County, Pennsylvania

| Water Well ID | Sample Date | Sampling Port                    | Topographic Location | Gas Extraction Area (Within 1 km of Active Gas Well) | Dissolved Oxygen - Field (mg/L) | Ethane ug/L | Hardness (mg/L) | Iron (mg/L) | Lead (mg/L) | Magnesium (mg/L) | Manganese (mg/L) | Mercury (mg/L) | Methane ug/L | Nitrate as N (mg/L) | Oil Grease (mg/L) | pH - Field (SU) | Potassium (mg/L) |
|---------------|-------------|----------------------------------|----------------------|------------------------------------------------------|---------------------------------|-------------|-----------------|-------------|-------------|------------------|------------------|----------------|--------------|---------------------|-------------------|-----------------|------------------|
| 157           | 9/17/2010   | Kitchen Sink                     | Valley               |                                                      | 3.7                             | 0.71        | 48.87348        | < .05       | < .001      | 4.41             | < .025           | < .0002        | 5100         | < 1                 |                   | 7.59            | 1.76             |
| 158           | 1/10/2010   | Basement Pressure Tank           | Upland               |                                                      | 49                              | < .025      |                 | < .05       |             | 6.49             | < .025           |                | 0.71         |                     |                   | 7.55            |                  |
| 159           | 10/3/2010   | Kitchen Sink                     | Valley               | Yes                                                  | 2.24                            | < .025      | 169.3858        | < .05       | < .001      | 11.3             | < .025           | < .0002        | 2            | < 1                 | < 5               | 6.6             | 1.5              |
| 160           | 1/31/2011   | Kitchen Sink                     | Upland               |                                                      | 9.64                            | < .025      | 74.341          | < .05       | < .0003     | 3.5              | < .0025          | < .0002        | 0.34         | < 1                 | < 5               | 6.99            | 1.5              |
| 161           | 4/8/2009    | Laundry Sink                     | Upland               |                                                      | 1.82                            | < .025      |                 | < .025      |             | 13.3             | < .025           |                | 1.3          |                     | < 5               | 7.59            |                  |
| 162           | 10/7/2010   | Kitchen Sink                     | Upland               |                                                      | 3.12                            | < .025      | 123.8789        | 0.087       | < .001      | 4.13             | < .025           | < .0002        | 0.68         |                     | < 5               | 6.93            | 1.6              |
| 163           | 10/7/2010   | Kitchen Sink                     | Valley               | Yes                                                  | 4.14                            | < .025      | 127.8824        | 0.37        | < .001      | 6.8              | 0.081            | < .0002        | 0.2          |                     | < 5               | 6.56            | 1.1              |
| 164           | 10/7/2010   |                                  | Valley               | Yes                                                  |                                 | < .025      | 140.145         | 1.31        | 0.034       | 8.08             | 0.136            | < .0002        | 4.7          | < 1                 | < 5               |                 | 1.1              |
| 165           | 4/8/2009    | Boiler Room                      | Upland               |                                                      | 5.3                             | < .025      |                 | < .025      |             | 8.4              | < .025           |                | 8.1          |                     |                   | 8.99            |                  |
| 166           | 7/14/2011   | Kitchen Sink                     | Upland               |                                                      | 10.41                           | < .025      |                 |             |             |                  |                  |                | 0.31         |                     |                   | 7.24            |                  |
| 167           | 7/14/2011   | Kitchen Sink                     | Upland               |                                                      | 10.41                           | < .025      |                 |             |             |                  |                  |                | 0.14         |                     |                   | 7.76            |                  |
| 168           | 10/8/2010   | Kitchen Faucet                   | Valley               | Yes                                                  | 3.92                            | < .025      | 96.3981         | < .05       | < .001      | 5.4              | < .025           | < .0002        | 0.48         | < 1                 | < 5               | 6.99            | 1.2              |
| 169           | 10/8/2010   | Outside Spigot                   | Valley               | Yes                                                  | 6.21                            | < .025      | 140.6954        | 0.477       | < .005      | 8.82             | < .025           | < .0002        | 1.5          | < 1                 | < 5               | 7.27            | 1.2              |
| 170           | 7/22/2010   | Pressure Tank                    | Upland               | Yes                                                  | 5.32                            | 0.037       |                 | < .05       |             | 3.55             | 0.105            |                | 210          |                     |                   | 7.69            |                  |
| 171           | 4/8/2009    | Career & Tech Bldg Pressure Tank | Upland               |                                                      | 5.97                            | 0.062       |                 | < .025      |             | 1.23             | < .025           |                | 59           |                     | < 5               | 8.37            |                  |
| 172           | 4/8/2009    | Boiler Room                      | Upland               |                                                      | 2.47                            | < .025      |                 | < .025      |             | 5.72             | < .025           |                | 17           |                     | < 5               | 7.93            |                  |
| 173           | 10/1/2010   | Kitchen Sink                     | Valley               | Yes                                                  | 4.23                            | 7.7         | 43.24492        | 0.051       | < .001      | 2.74             | < .025           | < .0002        | 22000        | < 1                 | < 5               | 7.81            | 2                |
| 174           | 11/5/2009   | Pressure Tank                    | Upland               | Yes                                                  |                                 | < .025      |                 | < .05       |             | 6.1              | < .025           |                | 0.32         |                     |                   | 7.36            |                  |
| 175           | 7/14/2011   | Spigot On Side Of House          | Valley               |                                                      | 4.42                            | < .025      |                 |             |             |                  |                  |                | 1.6          |                     |                   | 7.63            |                  |
| 176           | 7/14/2011   | Kitchen Sink                     | Valley               |                                                      | 7.34                            | < .025      |                 |             |             |                  |                  |                | 0.3          |                     |                   | 7.87            |                  |
| 177           | 7/14/2011   | Kitchen Sink                     | Valley               |                                                      | 3.82                            | < .025      |                 |             |             |                  |                  |                | 1.9          |                     |                   | 6.82            |                  |
| 178           | 7/14/2011   | Kitchen Sink                     | Upland               |                                                      | 2.54                            | < .025      |                 |             |             |                  |                  |                | 0.36         |                     |                   | 8.13            |                  |
| 179           | 7/14/2011   | Kitchen Sink                     | Upland               |                                                      | 8.78                            | < .025      |                 |             |             |                  |                  |                | < .1         |                     |                   | 6.62            |                  |

Table S.8. Groundwater Quality Data for 1701 "Pre-Drill" Water Well Samples from Susquehanna County, Pennsylvania

| Water Well ID | Sample Date | Sampling Port                | Topographic Location | Gas Extraction Area (Within 1 km of Active Gas Well) | Dissolved Oxygen - Field (mg/L) | Ethane ug/L | Hardness (mg/L) | Iron (mg/L) | Lead (mg/L) | Magnesium (mg/L) | Manganese (mg/L) | Mercury (mg/L) | Methane ug/L | Nitrate as N (mg/L) | Oil Grease (mg/L) | pH - Field (SU) | Potassium (mg/L) |
|---------------|-------------|------------------------------|----------------------|------------------------------------------------------|---------------------------------|-------------|-----------------|-------------|-------------|------------------|------------------|----------------|--------------|---------------------|-------------------|-----------------|------------------|
| 180           | 10/10/2010  | Kitchen Sink Rental Property | Valley               | Yes                                                  | 2.74                            | < .025      | 197.4357        | 0.077       | 0.001       | 13.2             | < .025           | < .0002        | 1.1          | < 1                 | < 5               | 5.95            | 1.4              |
| 181           | 4/15/2009   | Pressure Tank                | Valley               | Yes                                                  | 8.77                            | < .025      |                 | < .05       |             | 4.69             | < .025           |                | 0.23         |                     | < 5               | 7.65            |                  |
| 182           | 10/10/2010  | Kitchen Sink                 | Valley               | Yes                                                  | 3.07                            | < .025      | 121.851         | 0.232       | 0.002       | 6.73             | < .025           | < .0002        | 0.44         | < 1                 | < 5               | 6.91            | 1.2              |
| 183           | 11/4/2010   | Kitchen Sink                 | Valley               |                                                      | 5.63                            | < .025      | 83.7338         | < .05       | 0.0006      | 7.6              | < .0025          | < .0002        | 0.18         | < 1                 | < 5               | 6.59            | 1.06             |
| 184           | 11/4/2010   | Kitchen Sink                 | Upland               |                                                      | 5.98                            | < .025      | 96.1402         | 0.074       | 0.00084     | 9.4              | < .0025          | < .0002        | 0.17         | < 1                 | < 5               | 6.84            | 1.35             |
| 185           | 3/12/2009   | Basement Before Filter       | Upland               | Yes                                                  | 8.66                            | 0.25        |                 | < .05       |             | 2.13             | 0.027            |                | 3000         |                     | < 5               | 6.34            |                  |
| 186           | 10/10/2010  | Outside Spigot               | Valley               | Yes                                                  | 4.94                            | < .025      | 129.1695        | 0.07        | < .001      | 6.87             | < .025           | < .0002        | 0.12         | < 1                 | < 5               | 6.86            | 1.3              |
| 187           | 11/4/2010   | Pressure Tank                | Valley               |                                                      | 5.28                            | 0.23        | 67.9806         | < .05       | 0.001       | 6.2              | 0.0095           | < .0002        | 1100         | < 1                 | < 5               | 7.41            | 1.3              |
| 188           | 11/6/2010   | Kitchen Sink                 | Valley               | Yes                                                  | 6.14                            | < .025      | 104.5858        | < .05       | < .0003     | 6.6              | 0.03             | < .0002        | 0.21         | < 1                 | < 5               | 6.64            | 1.16             |
| 189           | 11/6/2010   | Outside Spigot               | Valley               |                                                      | 3.9                             | < .025      | 95.7546         | < .05       | 0.0045      | 8.7              | < .0025          | < .0002        | < .1         | < 1                 | < 5               | 6.88            | 1.27             |
| 190           | 11/7/2010   | Kitchen Sink                 | Valley               | Yes                                                  | 4.16                            | < .025      | 189.248         | 0.14        | 0.00062     | 12               | 0.025            | < .0002        | < .1         | < 1                 | < 5               | 6.85            | 1.28             |
| 191           | 11/7/2010   | Pressure Tank                | Valley               | Yes                                                  | 7.01                            | < .025      | 137.3538        | 0.13        | 0.008       | 9.1              | < .0025          | < .0002        | 0.11         | < 1                 | < 5               | 6.27            | 1.42             |
| 192           | 11/7/2010   | Kitchen Sink                 | Valley               | Yes                                                  | 5.2                             | < .025      | 160.16          | 0.087       | < .00013    | 11               | 0.013            | < .0002        | 12           | < 1                 | < 5               | 6.71            | 1.22             |
| 193           | 10/13/2010  | Kitchen Faucet               | Valley               | Yes                                                  | 4.35                            | < .025      | 137.2755        | 0.109       | < .001      | 7.08             | < .025           | < .0002        | 0.32         | < 1                 | < 5               | 6.46            | 1.38             |
| 194           | 10/13/2010  | Pressure Tank                | Valley               | Yes                                                  | 6.07                            | < .025      | 141.0503        | < .05       | < .001      | 9.27             | < .025           | < .0002        | 0.18         | < 1                 | < 5               | 7.13            | 1.5              |
| 195           | 10/13/2010  | Pressure Tank                | Valley               | Yes                                                  | 3.84                            | < .025      | 115.6733        | < .05       | 0.003       | 6.2              | < .025           | < .0002        | 0.16         | < 1                 | < 5               | 5.87            | 1.59             |
| 196           | 10/13/2010  | Kitchen Sink                 | Valley               | Yes                                                  | 3.51                            | < .025      | 124.0527        | < .05       | < .001      | 5.87             | < .025           | < .0002        | < .1         | < 1                 | < 5               | 6.38            | 1.5              |
| 197           | 10/11/2010  | Kitchen Sink                 | Valley               | Yes                                                  | 7.94                            | < .025      | 49.3272         | < .05       | 0.001       | 3.55             | < .025           | < .0002        | 0.16         | < 1                 | < 5               | 5.45            | 1.3              |
| 198           | 10/18/2010  | Bathroom Sink                | Valley               |                                                      |                                 | <0.025      |                 | 0.064       | <0.001      | 8.96             | 4.79             | <0.0002        | 50           | <1                  | <5                |                 | 1.29             |
| 199           | 10/2/2010   | Kitchen Sink Faucet          | Upland               |                                                      | 2.79                            | < .025      | 88.43128        | < .05       | 0.001       | 4.86             | 0.183            | < .0002        | 180          | < 1                 | < 5               | 7.19            | 1.7              |

Table S.8. Groundwater Quality Data for 1701 "Pre-Drill" Water Well Samples from Susquehanna County, Pennsylvania

| Water Well ID | Sample Date | Sampling Port          | Topographic Location | Gas Extraction Area (Within 1 km of Active Gas Well) | Dissolved Oxygen - Field (mg/L) | Ethane ug/L | Hardness (mg/L) | Iron (mg/L) | Lead (mg/L) | Magnesium (mg/L) | Manganese (mg/L) | Mercury (mg/L) | Methane ug/L | Nitrate as N (mg/L) | Oil Grease (mg/L) | pH - Field (SU) | Potassium (mg/L) |
|---------------|-------------|------------------------|----------------------|------------------------------------------------------|---------------------------------|-------------|-----------------|-------------|-------------|------------------|------------------|----------------|--------------|---------------------|-------------------|-----------------|------------------|
| 200           | 10/2/2010   | Pressure Tank          | Valley               |                                                      | 4.39                            | < .025      | 107.4811        | < .05       | 0.002       | 4.15             | < .025           | < .0002        | 0.49         | < 1                 | < 5               | 6.95            | 1.3              |
| 201           | 10/2/2010   | Bathroom Faucet        | Valley               |                                                      | 1.85                            | < .025      | 97.92062        | 0.072       | 0.005       | 3.89             | < .025           | < .0002        | 0.64         | < 1                 | < 5               | 6.96            | 1.4              |
| 202           | 10/15/2010  | Kitchen Sink           | Valley               | Yes                                                  | 4.23                            | < .025      | 110.5022        | < .05       | < .001      | 5.49             | < .025           | < .0002        | 0.078        | < 1                 | < 5               | 6.61            | 1.17             |
| 203           | 4/19/2009   |                        | Valley               | Yes                                                  |                                 | <0.025      |                 | <0.025      |             | 2.56             | <0.025           |                | 1.1          |                     |                   |                 |                  |
| 204           | 4/4/2008    |                        | Upland               |                                                      |                                 | <0.025      |                 | <0.025      |             | 1.66             | <0.025           |                | 0.28         |                     |                   |                 |                  |
| 205           | 10/19/2010  | Kitchen Sink           | Valley               | Yes                                                  | 2.25                            | < .025      | 97.7825         | 0.501       | < .001      | 6.1              | 0.048            |                | 6.4          | < 1                 | < 5               | 7.02            | 1.9              |
| 206           | 10/19/2010  | Kitchen Sink           | Valley               | Yes                                                  | 3.71                            | < .025      | 148.2114        | < .05       | 0.002       | 6.34             | < .025           | < .0002        | 0.15         | < 1                 | < 5               | 6.47            | 3.16             |
| 207           | 10/19/2010  | Hand Dug Well          | Valley               | Yes                                                  | 5.27                            | < .025      | 37.95816        | 0.223       | < .001      | 1.82             | < .025           | < .0002        | 0.5          | < 1                 | < 5               | 6.13            | 1.7              |
| 208           | 10/20/2010  | Kitchen Sink           | Valley               | Yes                                                  | 5.68                            | < .025      | 124.7291        | < .05       | < .001      | 6.58             | < .025           | < .0002        | 0.12         | < 1                 | < 5               | 7.14            | 1.13             |
| 209           | 10/26/2010  | Kitchen Sink           | Valley               | Yes                                                  | 3.92                            | < .025      | 127.8105        | 0.244       | < .001      | 6.54             | < .025           | < .0002        | 0.74         | < 1                 | < 5               | 6.59            | 1.12             |
| 210           | 10/26/2010  | Outside Spigot         | Valley               |                                                      | 4.68                            | < .025      | 146.9524        | 0.66        | < .001      | 6.58             | 0.038            | < .0002        | 2.8          | < 1                 | < 5               | 6.98            | 1.3              |
| 211           | 7/14/2011   | Kitchen Sink           | Upland               |                                                      | 8.9                             | < .025      |                 |             |             |                  |                  |                | 0.11         |                     |                   | 7.86            |                  |
| 212           | 8/1/2011    | Kitchen Sink           | Valley               |                                                      | 3.72                            | < .025      |                 |             |             |                  |                  |                | 0.7          |                     |                   | 7.66            |                  |
| 213           | 10/26/2010  |                        | Valley               | Yes                                                  |                                 | < .025      | 114.8875        | 0.128       | 0.004       | 7.04             | < .025           | < .0002        | 0.24         | < 1                 | < 5               |                 | 1.23             |
| 214           | 10/28/2010  | Kitchen Sink           | Valley               | Yes                                                  | 4.75                            | < .025      | 148.9224        | < .05       | 0.001       | 9.12             | < .025           | < .0002        | 1.8          | < 1                 | < 5               | 7.16            | 1.26             |
| 215           | 7/17/2010   | Outside Spigot         | Valley               |                                                      | 3.76                            | < .025      |                 | < .05       |             | 5.45             | 0.25             |                | 0.76         |                     |                   | 7.47            |                  |
| 216           | 10/28/2010  | Basement Pressure Tank | Valley               |                                                      | 3.84                            | < .025      | 101.5909        | < .05       | 0.01        | 4.66             | 0.092            | < .0002        | 9.3          | < 1                 | < 5               | 7.05            | 2.09             |
| 217           | 10/28/2010  | Pressure Tank          | Upland               |                                                      | 4.58                            | < .025      | 144.4554        | < .05       | 0.002       | 6.58             | < .025           | < .0002        | 0.13         | < 1                 | < 5               | 7.26            | 1.45             |
| 218           | 10/28/2010  | Bar Sink               | Upland               |                                                      | 8.57                            | < .025      | 68.52078        | < .05       | 0.002       | 3.36             | < .025           | < .0002        | 0.15         | < 1                 | < 5               | 6.01            | 1.11             |
| 219           | 10/29/2010  | Outside Spigot         | Valley               | Yes                                                  | 3.33                            | < .025      | 73.23962        | < .05       | < .001      | 2.99             | < .025           | < .0002        | 12           | < 1                 | < 5               | 6.95            | 2.82             |
| 220           | 10/29/2010  |                        | Valley               |                                                      |                                 | < .021      | 113.0718        | < .05       | < .001      | 4.78             | < .025           | < .0002        | 1.5          | < 1                 | < 5               |                 | 1.56             |
| 221           | 10/29/2010  | Outside Sink           | Valley               |                                                      | 7.74                            | < .025      | 84.77674        | < .05       | 0.003       | 3.73             | < .025           | < .0002        | 0.11         | < 1                 | < 5               | 5.97            | 1.28             |
| 222           | 10/29/2010  | Kitchen Faucet         | Upland               |                                                      | 3.15                            | < .025      | 134.1013        | < .05       | < .001      | 7.34             | < .025           | < .0002        | 0.12         | < 1                 | < 5               | 6.67            | 1.04             |
| 223           | 11/10/2010  | Kitchen Sink           | Upland               |                                                      | 5.21                            | < .025      | 108.8348        | 0.55        | 0.0094      | 4.6              | < .0025          | < .0002        | < .1         | < 1                 | < 5               | 7.01            | 1.9              |

Table S.8. Groundwater Quality Data for 1701 "Pre-Drill" Water Well Samples from Susquehanna County, Pennsylvania

| Water Well ID | Sample Date | Sampling Port             | Topographic Location | Gas Extraction Area (Within 1 km of Active Gas Well) | Dissolved Oxygen - Field (mg/L) | Ethane ug/L | Hardness (mg/L) | Iron (mg/L) | Lead (mg/L) | Magnesium (mg/L) | Manganese (mg/L) | Mercury (mg/L) | Methane ug/L | Nitrate as N (mg/L) | Oil Grease (mg/L) | pH - Field (SU) | Potassium (mg/L) |
|---------------|-------------|---------------------------|----------------------|------------------------------------------------------|---------------------------------|-------------|-----------------|-------------|-------------|------------------|------------------|----------------|--------------|---------------------|-------------------|-----------------|------------------|
| 224           | 11/10/2010  | Kitchen Sink              | Valley               |                                                      | 4.51                            | < .025      | 96.1664         | 0.17        | 0.0047      | 8.8              | < .0025          | < .0002        | < .1         | < 1                 | < 5               | 6.81            | 1.1              |
| 225           | 9/28/2010   |                           | Upland               |                                                      |                                 | 0.012       | 162.6398        | 1           | < .005      | 13.3             | < .025           | < .0002        | 1            | < 1                 |                   |                 | 1.6              |
| 226           | 11/11/2010  | Outside Spigot            | Valley               | Yes                                                  | 5.16                            | < .025      | 167.651         | 0.13        | < .0003     | 11               | < .0025          | < .0002        | 0.58         | < 1                 | < 5               | 7.08            | 1.51             |
| 227           | 11/11/2010  | Kitchen Faucet            | Valley               | Yes                                                  | 4.01                            | 0.026       | 113.593         | < .05       | < .0003     | 10               | 0.012            | < .0002        | 170          | < 1                 | < 5               | 6.59            | 1.25             |
| 228           | 9/28/2010   | Kitchen Sink              | Valley               |                                                      | 7.64                            | < .025      | 81.3105         | < .05       | < .005      | 2.1              | < .025           | < .0002        | < .1         | < 1                 | < 5               | 7.27            | < .001           |
| 229           | 11/17/2010  | Kitchen Sink              | Valley               | Yes                                                  | 3.7                             | < .025      | 140.6482        | < .05       | 0.00037     | 9.9              | 0.0026           | < .0002        | 0.19         | < 1                 | < 5               | 7.31            | 1.4              |
| 230           | 11/17/2010  | Kitchen Sink              | Upland               |                                                      | 6.98                            | < .025      | 174.4232        | 1.6         | 0.028       | 8.4              | 8.1              | < .0002        | 0.31         | < 1                 | < 5               | 7.09            | 1.55             |
| 231           | 11/17/2010  | Kitchen Sink              | Upland               |                                                      | 10.76                           | < .025      | 29.8723         | < .05       | 0.0011      | 2.1              | < .0025          | < .0005        | 0.31         | < 1                 | < 5               | 7.32            | 0.829            |
| 232           | 12/4/2010   | Kitchen Sink              | Valley               | Yes                                                  | 4.39                            | < .025      | 158.6678        | < .05       | < .001      | 9.91             | < .025           | < .0002        | 0.13         | < 1                 | < 5               | 6.72            | 1.35             |
| 233           | 12/4/2010   | Kitchen Sink              | Valley               | Yes                                                  | 9.17                            | < .025      | 30.7659         | 0.116       | 0.001       | 1.65             | < .025           | < .0002        | 0.26         | < 1                 | < 5               | 6.19            | 0.969            |
| 234           | 12/4/2010   | Basement At Pressure Tank | Valley               | Yes                                                  | 5.8                             | < .025      | 132.7633        | 0.084       | 0.042       | 6.53             | < .025           | < .0002        | 0.15         | < 1                 | < 5               | 6.66            | 1.24             |
| 235           | 12/4/2010   | Kitchen Sink              | Valley               | Yes                                                  | 4.15                            | < .025      | 148.4896        | 0.226       | 0.013       | 9.5              | < .025           | < .0002        | 0.21         | < 1                 | < 5               | 6.95            | 1.37             |
| 236           | 12/5/2010   | Kitchen Sink              | Upland               | Yes                                                  | 8.18                            | < .025      | 44.48032        | < .05       | < .001      | 3.04             | < .025           | < .0002        | 0.18         | < 1                 | < 5               | 5.46            | 1.68             |
| 237           | 12/5/2010   | Kitchen Faucet            | Valley               | Yes                                                  | 3.46                            | < .025      | 157.669         | < .05       | < .001      | 9.91             | < .025           | < .0002        | 0.67         | < 1                 | < 5               | 6.63            | 1.61             |
| 238           | 12/5/2010   | Barn At Ceiling Spigot    | Valley               | Yes                                                  | 5.82                            | 8           | 97.10078        | < .05       | < .001      | 5.51             | 0.074            | < .0002        | 5200         | < 1                 | < 5               | 7.43            | 1.93             |
| 239           | 2/17/2009   | Kitchen Sink              | Valley               | Yes                                                  | 3.78                            | < .025      |                 | < .05       |             | 6.37             | < .025           |                | 8.2          |                     | < 5               | 8.05            |                  |
| 240           | 12/8/2010   | Kitchen Sink              | Valley               | Yes                                                  | 4.07                            | < .025      | 155.166         | < .05       | 0.00064     | 11               | 0.012            | < .0002        | 0.78         | < 1                 | < 5               | 7.19            | 1.6              |
| 241           | 12/8/2010   | Kitchen Sink              | Upland               |                                                      | 8.17                            | < .025      | 34.4938         | < .05       | 0.0011      | 1.1              | < .0025          | < .0002        | 0.3          | < 1                 | < 5               | 5.69            | < 1              |
| 242           | 12/8/2010   | Kitchen Sink              | Valley               | Yes                                                  | 9.94                            | < .025      | 21.8336         | 0.063       | 0.00064     | 1.3              | 0.014            | < .0002        | 0.32         | < 1                 | < 5               | 5.53            | < 1              |
| 243           | 12/8/2010   | Hand Dug Well             | Upland               |                                                      | 8.72                            | < .025      | 95.5262         | < .05       | < .0003     | 4.4              | 0.0036           | < .0002        | 0.12         | < 1                 | < 5               | 6.25            | 11               |
| 244           | 2/17/2009   | Kitchen Sink              | Valley               | Yes                                                  | 3.14                            | < .025      |                 | 0.047       |             | 5.56             | < .025           |                | 1.7          |                     | < 5               | 6.7             |                  |
| 245           | 4/4/2009    | Well Head                 | Valley               | Yes                                                  | 3.79                            | < .025      |                 | 2.46        |             | 7.61             | 0.229            |                | 1.5          |                     | < 5               | 7.36            |                  |

Table S.8. Groundwater Quality Data for 1701 "Pre-Drill" Water Well Samples from Susquehanna County, Pennsylvania

| Water Well ID | Sample Date | Sampling Port             | Topographic Location | Gas Extraction Area (Within 1 km of Active Gas Well) | Dissolved Oxygen - Field (mg/L) | Ethane ug/L | Hardness (mg/L) | Iron (mg/L) | Lead (mg/L) | Magnesium (mg/L) | Manganese (mg/L) | Mercury (mg/L) | Methane ug/L | Nitrate as N (mg/L) | Oil Grease (mg/L) | pH - Field (SU) | Potassium (mg/L) |
|---------------|-------------|---------------------------|----------------------|------------------------------------------------------|---------------------------------|-------------|-----------------|-------------|-------------|------------------|------------------|----------------|--------------|---------------------|-------------------|-----------------|------------------|
| 246           | 12/11/2010  | Kitchen Sink              | Valley               |                                                      | 2.6                             | < .025      | 48.626          | < .05       | < .0003     | 1.5              | 0.024            | < .0002        | 0.23         | < 1                 | < 5               | 6.81            | 2                |
| 247           | 12/11/2010  |                           | Upland               |                                                      |                                 | < .025      | 43.2202         | < .05       | 0.0037      | 1.4              | < .0025          | < .0002        | 0.65         | < 1                 | < 5               |                 | < 1              |
| 248           | 12/11/2010  | Kitchen Sink              | Valley               |                                                      | 7.08                            | < .025      | 90.5322         | < .05       | < .0003     | 4.4              | 0.0034           | < .0002        | < .1         | < 1                 | < 5               | 6.51            | 1.7              |
| 249           | 3/16/2009   | Basement At Pressure Tank | Valley               | Yes                                                  | 8.23                            | < .025      |                 | < .05       |             | 3.45             | < .025           |                | 0.5          |                     | < 5               | 6.73            |                  |
| 250           | 12/17/2010  | Pressure Tank             | Upland               |                                                      | 7.33                            | < .025      | 51.4824         | 0.27        | 0.013       | 2.8              | 0.0065           | 0.0002         | 0.11         | < 1                 | < 5               | 6.2             | 0.84             |
| 251           | 12/17/2010  | Pressure Tank             | Upland               |                                                      | 8.48                            | < .025      | 55.2148         | 1.5         | 0.015       | 3.1              | 0.054            | < .0002        | < .58        | < 1                 | < 5               | 6.91            | 1.3              |
| 252           | 12/18/2010  | Basement Pressure Tank    | Valley               | Yes                                                  | 5.19                            | 0.016       | 148.1654        | 0.29        | 0.0052      | 9.3              | 0.19             | < .0002        | 13           | < 1                 | < 5               | 6.79            | 1.3              |
| 253           | 6/24/2009   | Kitchen Sink              | Upland               | Yes                                                  | 1.14                            | < .025      |                 | 0.101       |             | 8.19             | < .025           |                | 27           |                     | < 5               | 7.95            |                  |
| 254           | 12/18/2010  | Kitchen Sink              | Valley               | Yes                                                  | 1.89                            | 3.2         | 99.1014         | 1.1         | 0.00043     | 8.3              | 0.18             | < .0002        | 19000        | < 1                 | < 5               | 7.14            | 1.4              |
| 255           | 3/19/2009   | Kitchen Sink              | Valley               | Yes                                                  | 3.1                             | < .025      |                 | < .05       |             | 7.23             | < .025           |                | 1.1          |                     | < 5               | 7.57            |                  |
| 256           | 3/19/2009   | Kitchen Sink              | Upland               | Yes                                                  | 2.63                            | < .025      |                 | < .05       |             | 8.04             | < .025           |                | 7.6          |                     | < 5               | 7.37            |                  |
| 257           | 12/14/2010  | Kitchen Sink              | Valley               | Yes                                                  | 4.06                            | < .025      | 119.2084        | < .05       | < .0003     | 5.3              | < .0025          | < .0002        | 0.12         | < 1                 | < 5               | 6.71            | 1.3              |
| 258           | 3/4/2009    | Kitchen Sink              | Upland               |                                                      | 7.62                            | 0.026       |                 | < .025      |             | 6.28             | < .025           |                | 0.92         |                     | < 5               | 7.5             |                  |
| 259           | 12/14/2010  | Hydrant                   | Valley               | Yes                                                  | 12.12                           | < .025      | 119.594         | 14          | 0.15        | 6                | 6.4              | < .0002        | 1.3          | < 1                 | < 5               | 6.85            | 1.9              |
| 260           | 12/14/2010  | Kitchen Sink              | Valley               | Yes                                                  | 3.16                            | 0.18        | 104.6644        | < .05       | 0.00031     | 4.8              | 0.0036           | < .0002        | 770          | < 1                 | < 5               | 7.03            | 1.5              |
| 261           | 12/14/2010  | Bathtub Faucet            | Valley               | Yes                                                  | 5.3                             | < .025      | 156.48          | < .05       | < .0003     | 9.5              | 0.0087           | < .0002        | 0.2          | < 1                 | < 5               | 6.99            | 1.5              |
| 262           | 2/23/2011   |                           | Valley               | Yes                                                  |                                 | < .025      | 102.1412        | 0.23        | 0.002       | 5.4              | 0.004            | < .0002        | 8.4          | < 1                 | < 5               |                 | 1.2              |
| 263           | 12/19/2010  |                           | Valley               | Yes                                                  |                                 | < .025      | 149.8388        | 0.14        | < .0003     | 9.1              | 0.0025           | < .0002        | 1.5          | < 1                 | < 5               |                 | 1.5              |
| 264           | 12/19/2010  | Kitchen Sink              | Valley               |                                                      | 4.03                            | 0.11        | 64.2482         | < .05       | < .0003     | 5.9              | 0.029            | < .0002        | 290          | < 1                 | < 5               | 7.77            | 1.8              |
| 265           | 12/19/2010  | Kitchen Faucet            | Valley               |                                                      | 9                               | < .025      | 54.3388         | < .05       | 0.00039     | 4.1              | < .0025          | < .0002        | 2.7          | < 1                 | < 5               | 7.01            | 1.5              |

Table S.8. Groundwater Quality Data for 1701 "Pre-Drill" Water Well Samples from Susquehanna County, Pennsylvania

| Water Well ID | Sample Date | Sampling Port                                      | Topographic Location | Gas Extraction Area (Within 1 km of Active Gas Well) | Dissolved Oxygen - Field (mg/L) | Ethane ug/L | Hardness (mg/L) | Iron (mg/L) | Lead (mg/L) | Magnesium (mg/L) | Manganese (mg/L) | Mercury (mg/L) | Methane ug/L | Nitrate as N (mg/L) | Oil Grease (mg/L) | pH - Field (SU) | Potassium (mg/L) |
|---------------|-------------|----------------------------------------------------|----------------------|------------------------------------------------------|---------------------------------|-------------|-----------------|-------------|-------------|------------------|------------------|----------------|--------------|---------------------|-------------------|-----------------|------------------|
| 266           | 12/19/2010  | School Art Studio Bathroom Sink                    | Valley               | Yes                                                  | 4.64                            | 0.025       | 131.641         | < .05       | 0.00036     | 6.5              | 0.003            | < .0002        | 2.7          | < 1                 | < 5               | 6.77            | 1.3              |
| 267           | 2/26/2009   |                                                    | Upland               |                                                      |                                 | <0.025      |                 | <0.025      |             | 4.68             | <0.025           |                | 2.8          |                     |                   |                 |                  |
| 268           | 1/27/2011   | Downstairs Kitchen Sink                            | Valley               |                                                      | 4.38                            | 0.14        | 14.00342        | < .05       | 0.00068     | < .5             | 0.019            | < .0002        | 1100         | < 1                 | < 5               | 8.74            | 1.5              |
| 269           | 1/27/2011   | Kitchen Sink                                       | Valley               |                                                      | 8.23                            | < .025      | 88.4994         | 0.13        | 0.00027     | 3.3              | < .0025          | < .0002        | 0.34         | < 1                 | < 5               | 7.14            | 1.1              |
| 270           | 1/27/2011   | Kitchen Sink                                       | Valley               |                                                      | 5.98                            | 0.008       | 80.1848         | < .05       | 0.00012     | 3.1              | < .0025          | < .0002        | 0.23         | < 1                 | < 5               | 7.54            | 1                |
| 271           | 3/4/2009    | Kitchen Sink                                       | Upland               |                                                      | 5.34                            | < .025      |                 | < .025      |             | 8.79             | < .025           |                | 0.46         |                     | < 5               | 7.8             |                  |
| 272           | 2/11/2011   | Kitchen Sink                                       | Upland               | Yes                                                  | 5.52                            | < .025      | 180.136         | < .05       | < .0003     | 11               | < .0025          | < .0002        | < .1         | < 1                 | < 5               | 7.14            | 2.4              |
| 273           | 2/11/2011   | Kitchen Sink                                       | Upland               |                                                      | 4.37                            | < .025      | 239.188         | < .05       | 0.00031     | 12               | < .0025          | < .0002        | 1.1          | < 1                 | < 5               | 6.83            | 2.8              |
| 274           | 2/11/2011   | Kitchen Sink                                       | Upland               |                                                      | 4.62                            | 0.14        | 34.4676         | < .05       | 0.00033     | 1.7              | 0.041            | < .0002        | 440          | < 1                 | < 5               | 7.95            | 2.9              |
| 275           | 2/11/2011   | Kitchen Sink                                       | Upland               | Yes                                                  | 5.15                            | < .025      | 243.175         | < .05       | 0.00088     | 16               | 0.08             | < .0002        | 0.82         | < 1                 | < 5               | 7.15            | 3.9              |
| 276           | 2/11/2011   | In Milkhouse, At Bottom Of Pressure Tank           | Upland               |                                                      | 10.49                           | < .025      | 154.4734        | < .05       | 0.0079      | 7.8              | 0.0058           | < .0002        | 0.52         | < 1                 | < 5               | 7.24            | 2.3              |
| 277           | 2/4/2011    | Pressure Tank                                      | Valley               | Yes                                                  | 8.79                            | 0.068       | 143.995         | 1.5         | 0.0041      | 9.5              | 0.021            | < .0002        | 17           | < 1                 | < 5               | 7.08            | 1.3              |
| 278           | 2/8/2011    | Bathtub                                            | Valley               |                                                      |                                 | 0.036       | 146.5968        | 0.23        | 0.0012      | 7.1              | 0.0031           | < .0002        | 1            | < 1                 | < 5               |                 | 1.8              |
| 279           | 3/4/2009    | Kitchen Sink                                       | Upland               |                                                      | 7.05                            |             |                 | 0.046       |             | 5.94             | < .025           |                | 1.7          |                     |                   | 7.01            |                  |
| 280           | 2/8/2011    | Kitchen Sink                                       | Upland               |                                                      | 9.53                            | < .025      | 116.6852        | < .05       | 0.00063     | 5.9              | < .0025          | < .0002        | 1.7          | < 1                 | < 5               | 6.26            | 3.2              |
| 281           | 10/19/2010  | Kitchen Sink                                       | Valley               | Yes                                                  | 2.72                            | < .025      | 120.3405        | < .05       | < .001      | 6.06             | < .025           | < .0002        | 0.31         | < 1                 | < 5               | 6.73            | 1.48             |
| 282           | 2/8/2011    | Kitchen Sink, Small Spigot On Right Hand Side Of S | Valley               |                                                      | 4.53                            | < .025      | 111.7436        | < .05       | 0.0006      | 4.7              | 0.0062           | < .0002        | 1.3          | < 1                 | < 5               | 7.1             | 1                |
| 283           | 2/11/2011   | Kitchen Sink                                       | Upland               | Yes                                                  |                                 | < .025      | 27.6119         | < .05       | < .0003     | 2.4              | < .0025          | < .0002        | 0.12         | < 1                 | < 5               |                 | 1                |
| 284           | 2/11/2011   | Kitchen Sink                                       | Upland               |                                                      | 7.59                            | < .025      | 108.8086        | < .05       | 0.00075     | 5.2              | < .0025          | < .0002        | 0.14         | < 1                 | < 5               | 7.15            | 1.7              |

Table S.8. Groundwater Quality Data for 1701 "Pre-Drill" Water Well Samples from Susquehanna County, Pennsylvania

| Water Well ID | Sample Date | Sampling Port                      | Topographic Location | Gas Extraction Area (Within 1 km of Active Gas Well) | Dissolved Oxygen - Field (mg/L) | Ethane ug/L | Hardness (mg/L) | Iron (mg/L) | Lead (mg/L) | Magnesium (mg/L) | Manganese (mg/L) | Mercury (mg/L) | Methane ug/L | Nitrate as N (mg/L) | Oil Grease (mg/L) | pH - Field (SU) | Potassium (mg/L) |
|---------------|-------------|------------------------------------|----------------------|------------------------------------------------------|---------------------------------|-------------|-----------------|-------------|-------------|------------------|------------------|----------------|--------------|---------------------|-------------------|-----------------|------------------|
| 285           | 2/8/2011    | Rental (Adam Vibbard) Kitchen Sink | Upland               |                                                      | 7.46                            | < .025      | 134.1904        | < .05       | < .0003     | 5.3              | < .0025          | < .0002        | 0.23         | < 1                 | < 5               | 6.62            | 2                |
| 286           | 2/8/2011    | Kitchen Sink                       | Upland               |                                                      | 6.77                            | < .025      | 78.4852         | < .05       | 0.00077     | 3.9              | < .0025          | < .0002        | < .1         | < 1                 | < 5               | 6.85            | 1.1              |
| 287           | 1/13/2011   | Kitchen Sink                       | Valley               | Yes                                                  | 4.84                            | 0.78        |                 | < .05       |             | 7.4              | 0.005            |                | 28           |                     | < 5               | 7               |                  |
| 288           | 2/15/2011   | Pressure Tank                      | Upland               |                                                      | 5.78                            | < .025      | 100.494         | < .05       | 0.0022      | 5                | 0.019            | < .0002        | 0.17         | < 1                 | < 5               | 7.45            | 2                |
| 289           | 2/15/2011   | Laundry Room Faucet                | Upland               |                                                      | 5.38                            | < .025      | 61.4966         | < .05       | 0.00041     | 2.2              | 0.035            | < .0002        | 2.8          | < 1                 | < 5               | 7.72            | 2.7              |
| 290           | 3/4/2009    | Kitchen Sink                       | Valley               |                                                      | 2.38                            | < .025      |                 | 0.05        |             | 9.29             | 0.519            |                | 1.8          |                     | < 5               | 7.27            |                  |
| 291           | 2/14/2011   | Kitchen Sink                       | Upland               |                                                      | 6.6                             | < .025      | 135.3472        | < .05       | < .0003     | 7.4              | < .0025          | < .0002        | 0.62         | < 1                 | < 5               | 7.39            | 2.3              |
| 292           | 2/15/2011   | Kitchen Faucet                     | Valley               |                                                      | 5.89                            | < .025      | 159.0294        | < .05       | < .0003     | 8.3              | 0.0076           | < .0002        | 0.15         | < 1                 | < 5               | 7.09            | 1.8              |
| 293           | 2/14/2011   | Barn Milkhouse Sink                | Valley               |                                                      | 4.23                            | < .025      | 119.901         | < .05       | < .0003     | 8.5              | 0.003            | < .0002        | 0.32         | < 1                 | < 5               | 7.12            | < 1              |
| 294           | 2/15/2011   | Milkhouse Faucet                   | Upland               | Yes                                                  | 9.19                            | < .025      | 88.4732         | < .05       | < .0003     | 3.9              | < .0025          | < .0002        | 0.41         | < 1                 | < 5               | 7.02            | 2.7              |
| 295           | 2/15/2011   | 1St Floor Kitchen Faucet           | Upland               | Yes                                                  | 4.68                            | < .025      | 134.9092        | < .05       | < .0003     | 7.9              | 0.0042           | < .0002        | 0.22         | < 1                 | < 5               | 7.26            | 1.6              |
| 296           | 2/17/2011   | Pressure Tank In Basement          | Upland               | Yes                                                  | 8.98                            | < .025      | 199.236         | 0.086       | < .0003     | 12               | 0.003            | < .0002        | 0.24         | < 1                 | < 5               | 7.04            | 1.9              |
| 297           | 3/4/2009    | 1St Floor Mens Room Sink           | Valley               |                                                      | 4.02                            | < .025      |                 | 0.081       |             | 5.74             | < .025           |                | 0.34         |                     | < 5               | 7.68            |                  |
| 298           | 3/21/2011   |                                    | Valley               |                                                      |                                 | < 26        | 130             | 0.061       | < .001      | 7.4              | 0.052            | < .0002        | 20900        | < .05               | < 4.7             |                 | 6.7              |
| 299           | 3/21/2011   |                                    | Upland               | Yes                                                  |                                 | < 26        | 134             | 0.087       | < .001      | 9.9              | 0.0011           | < .0002        | < 26         | 1.4                 | < 4.7             |                 | 1.2              |
| 300           | 3/22/2011   |                                    | Valley               | Yes                                                  |                                 | < 26        | 104             | 0.16        | < .001      | 8.2              | 0.25             | < .0002        | 185          | < .05               | < 4.9             |                 | 0.92             |
| 301           | 3/4/2009    | Kitchen Sink                       | Valley               |                                                      | 3.34                            |             |                 | 0.079       |             | 5.39             | < .025           |                | 1.1          |                     |                   | 7.63            |                  |
| 302           | 12/10/2010  | Garage Faucet                      | Upland               | Yes                                                  | 3.11                            | < .025      | 148.551         | < .22       | < .0003     | 10               | < .0025          | < .0002        | 3.7          | < 1                 | < 5               | 6.98            | 1.2              |
| 303           | 12/10/2010  | Kitchen Faucet                     | Upland               | Yes                                                  | 4.07                            | < .025      | 116.7114        | < .05       | < .0003     | 5.3              | < .0025          | < .0002        | < .1         | < 1                 | < 5               | 7.3             | 1.2              |

Table S.8. Groundwater Quality Data for 1701 "Pre-Drill" Water Well Samples from Susquehanna County, Pennsylvania

| Water Well ID | Sample Date | Sampling Port             | Topographic Location | Gas Extraction Area (Within 1 km of Active Gas Well) | Dissolved Oxygen - Field (mg/L) | Ethane ug/L | Hardness (mg/L) | Iron (mg/L) | Lead (mg/L) | Magnesium (mg/L) | Manganese (mg/L) | Mercury (mg/L) | Methane ug/L | Nitrate as N (mg/L) | Oil Grease (mg/L) | pH - Field (SU) | Potassium (mg/L) |
|---------------|-------------|---------------------------|----------------------|------------------------------------------------------|---------------------------------|-------------|-----------------|-------------|-------------|------------------|------------------|----------------|--------------|---------------------|-------------------|-----------------|------------------|
| 304           | 12/10/2010  | Kitchen Sink              | Valley               | Yes                                                  | 5.37                            | < .025      | 124.15          | < .05       | < .0003     | 6.5              | < .0025          | < .0002        | < .1         | < 1                 | < 5               | 6.87            | 1.2              |
| 305           | 12/10/2010  |                           | Upland               | Yes                                                  | 4.25                            | < .025      | 128.2418        | 0.45        | 0.031       | 8.1              | 0.54             | < .0002        | 3.2          | < 1                 | < 5               | 7               | < 1              |
| 306           | 12/10/2010  | Pressure Tank             | Upland               |                                                      | 6.82                            | < .025      | 127.0326        | 0.07        | 0.0017      | 7.2              | 0.027            | < .0002        | 2.3          | < 1                 | < 5               | 6.77            | 1.3              |
| 307           | 12/10/2010  | Kitchen Faucet            | Valley               |                                                      | 7.57                            | < .025      | 37.4026         | < .05       | < .0003     | 1.2              | < .0025          | < .0002        | < .1         | < 1                 | < 5               | 6.36            | 1.8              |
| 308           | 12/14/2010  | Kitchen Sink              | Valley               | Yes                                                  | 4.3                             | < .025      | 126.6732        | < .05       | < .0003     | 5.9              | < .0025          | < .0002        | 0.58         | < 1                 | < 5               | 7.09            | < 1.2            |
| 309           | 3/12/2009   | Kitchen Sink Faucet       | Upland               |                                                      | 5.95                            | < .025      |                 | < .05       |             | 3.84             | < .025           |                | < .1         |                     | < 5               | 7.41            |                  |
| 310           | 12/20/2010  | Kitchen Sink              | Upland               |                                                      | 4.29                            | < .025      | 146.1588        | < .05       | < .0003     | 7.6              | 0.013            | < .0002        | < .1         | < 1                 | < 5               | 6.99            | 2                |
| 311           | 12/20/2010  | Pressure Tank             | Valley               |                                                      | 7.35                            | < .025      | 94.6764         | 1.8         | 0.0013      | 4.8              | 0.13             | < .0002        | 7.3          | < 1                 | < 5               | 7.49            | 1.9              |
| 312           | 12/20/2010  | Basement At Pressure Tank | Valley               |                                                      | 7.95                            | < .025      | 143.6618        | < .05       | 0.026       | 7.6              | 0.11             | < .0002        | 1.3          | < 1                 | < 5               | 7.02            | 1.3              |
| 313           | 12/20/2010  | Kitchen Sink              | Upland               |                                                      | 9.37                            | < .025      | 85.5644         | 0.14        | 0.0011      | 3.8              | 0.0061           | < .0002        | 0.11         | < 1                 | < 5               | 7.14            | 1.2              |
| 314           | 12/20/2010  | Kitchen Sink              | Upland               |                                                      | 6.09                            | < .025      | 81.832          | < .05       | 0.00037     | 3.5              | < .0025          | < .0002        | 0.84         | < 1                 | < 5               | 6.77            | 1.2              |
| 315           | 3/4/2009    | Pressure Tank In Basement | Upland               |                                                      | 6.38                            | < .025      |                 | 0.058       |             | 8.94             | < .025           |                | 0.98         |                     | < 5               | 7.58            |                  |
| 316           | 12/20/2010  | Bathtub Faucet            | Upland               |                                                      | 6.18                            | < .025      | 77.6878         | < .05       | < .0003     | 3.1              | < .0025          | < .0002        | 0.14         | < 1                 | < 5               | 6.75            | 1.5              |
| 317           | 4/15/2009   | Horse Barn Faucet         | Valley               | Yes                                                  | 3.31                            | < .025      |                 | < .05       |             | 5.17             | < .025           |                | 0.55         |                     | < 5               | 7.39            |                  |
| 318           | 1/6/2011    | Kitchen Sink              | Upland               | Yes                                                  | 9.5                             | 0.76        |                 | < .05       | 0.0016      | 4.4              | 0.042            | < .0002        | 2000         | < 1                 | < 5               | 7.14            | 1.6              |
| 319           | 4/19/2009   | Kitchen Sink Faucet       | Valley               | Yes                                                  | 6.6                             | 0.036       |                 | 0.051       |             | 6.85             | < .025           |                | 5.5          |                     | < 5               | 7.13            |                  |
| 320           | 4/8/2009    | Barn After Filter         | Valley               |                                                      | 8.21                            | < .025      |                 | 0.545       |             | 5.88             | < .025           |                | 0.16         |                     | < 5               | 6.66            |                  |
| 321           | 4/12/2011   | Cwt Of Kitchen Sink       | Valley               |                                                      | 8.54                            | < 26        | 112             | 0.17        | < .001      | 5.1              | 0.0013           | < .0002        | < 26         | 2.8                 | < 4.7             | 7.57            | 0.9              |
| 322           | 4/13/2011   | Well                      | Upland               | Yes                                                  |                                 | < 26        | 89              | 1           | 0.0014      | 4.9              | 0.23             | < .0002        | < 26         | < .05               | < 5.2             |                 | 1.4              |
| 323           | 4/13/2011   | Kitchen Sink              | Valley               | Yes                                                  | 5.98                            | < 26        | 75.6            | < .05       | < .001      | 2.1              | < .0005          | < .0002        | < 26         | 0.34                | < 4.6             | 7.39            | 0.75             |
| 324           | 4/13/2011   | Kitchen Sink Cwt          | Upland               |                                                      | 2.67                            | < 26        | 118             | 0.33        | < .001      | 4.9              | 0.54             | < .0002        | < 26         | 0.33                | < 4.6             | 7.71            | 1.2              |



Table S.8. Groundwater Quality Data for 1701 "Pre-Drill" Water Well Samples from Susquehanna County, Pennsylvania

| Water Well ID | Sample Date | Sampling Port                                | Topographic Location | Gas Extraction Area (Within 1 km of Active Gas Well) | Dissolved Oxygen - Field (mg/L) | Ethane ug/L | Hardness (mg/L) | Iron (mg/L) | Lead (mg/L) | Magnesium (mg/L) | Manganese (mg/L) | Mercury (mg/L) | Methane ug/L | Nitrate as N (mg/L) | Oil Grease (mg/L) | pH - Field (SU) | Potassium (mg/L) |
|---------------|-------------|----------------------------------------------|----------------------|------------------------------------------------------|---------------------------------|-------------|-----------------|-------------|-------------|------------------|------------------|----------------|--------------|---------------------|-------------------|-----------------|------------------|
| 325           | 4/13/2011   | Kitchen Sink Cwt                             | Upland               |                                                      | 5.28                            | < 26        | 82.5            | < .05       | < .001      | 3.1              | 0.0047           | < .0002        | < 26         | 0.87                | < 4.7             | 6.97            | 1.6              |
| 326           | 3/12/2009   | Basement Before Filter                       | Upland               | Yes                                                  | 5.83                            | < .025      |                 | < .05       |             | 5.55             | < .025           |                | < .1         |                     | < 5               | 7.78            |                  |
| 327           | 4/14/2011   | Farmhouse Kitchen Sink Cwt                   | Valley               |                                                      | 6.55                            | < 26        | 135             | 0.1         | < .001      | 5.4              | 0.025            | < .0002        | < 26         | 2.2                 | < 4.6             | 7.75            | 1.7              |
| 328           | 4/15/2011   | Kitchen Sink Cwt                             | Upland               |                                                      | 9.55                            | < 26        | 129             | 0.83        | < .001      | 5                | 0.0071           | < .0002        | < 26         | 1.4                 | < 4.7             | 7.26            | 1.3              |
| 329           | 4/18/2011   | Pressure Tank In Basement                    | Valley               |                                                      | 8.2                             | < 26        | 72.3            | < .05       | 0.0014      | 2.9              | 0.0012           | < .0002        | < 26         | 3.8                 | < 4.7             | 6.26            | 5                |
| 330           | 4/18/2011   | Kitchen Sink                                 | Upland               |                                                      | 5.48                            | < 26        | 191             | < .05       | < .001      | 7.7              | 0.0028           | < .0002        | < 26         | 3.4                 | < 4.6             | 7.44            | 1.2              |
| 331           | 4/19/2011   | Kitchen Faucet                               | Upland               |                                                      | 5.33                            | < 26        | 128             | < .05       | < .001      | 5.6              | 0.013            | < .0002        | < 26         | 0.13                | < 4.6             | 7.65            | 1                |
| 332           | 4/22/2011   | Mary Steele Kitchen Sink                     | Valley               | Yes                                                  | 10.37                           | < 26        | 84.6            | 0.079       | < .001      | 3.8              | 0.0011           | < .0002        | < 26         | 4.1                 | < 4.6             | 6.99            | 0.79             |
| 333           | 4/26/2011   | Kitchen Sink                                 | Valley               | Yes                                                  | 4.59                            | < 26        | 116             | < .05       | < .001      | 6.8              | 0.00072          | < .0002        | < 26         | 0.99                | < 4.6             | 7.26            | 1.1              |
| 334           | 4/27/2011   | Well 2                                       | Upland               | Yes                                                  | 4.08                            | < 26        | 130             | < .05       | < .001      | 6.8              | 0.002            | < .0002        | < 26         | 0.7                 | < 4.6             | 7.71            | 1.2              |
| 335           | 4/28/2011   | Basement Pressure Tank                       | Valley               | Yes                                                  | 0.52                            | < 26        | 116             | 1.6         | < .001      | 7.7              | 0.95             | < .0002        | < 26         | 0.4                 | < 4.7             | 7.42            | 1                |
| 336           | 4/28/2011   | Pressure Tank In Basement On E Side Of House | Valley               | Yes                                                  | 3                               | < 26        | 134             | 0.16        | < .001      | 7.8              | 0.031            | < .0002        | < 26         | 0.78                | < 4.6             | 7.58            | 1                |
| 337           | 5/2/2011    |                                              | Upland               | Yes                                                  |                                 | <26         | 111             | <0.05       | <0.001      | 3.7              | 0.045            | <0.0002        | <26          | 0.25                | <4.6              |                 | 1.7              |
| 338           | 5/2/2011    |                                              | Upland               | Yes                                                  | 6.27                            | <26         | 46.6            | <0.05       | 0.0019      | 2.2              | 0.0031           | <0.0002        | <26          |                     | <4.7              | 5.91            | 1.6              |
| 339           | 5/3/2011    | Kitchen Sink                                 | Valley               | Yes                                                  | 5.39                            | < 26        | 137             | 0.14        | < .001      | 8.3              | 0.0007           | < .0002        | < 26         | 1.1                 | < 4.6             | 7.37            | 1.3              |
| 340           | 5/4/2011    | Kitchen Cwt                                  | Valley               | Yes                                                  | 3.84                            | < 26        | 98.6            | 0.055       | < .001      | 5.1              | 0.0007           | < .0002        | < 26         | 2.9                 | < 4.6             | 7.53            | 0.95             |
| 341           | 5/4/2011    | Kitchen Sink                                 | Valley               | Yes                                                  | 3.18                            | < 26        | 101             | < .05       | < .001      | 5.1              | < .0005          | < .0002        | < 26         | 2.3                 | < 4.6             | 7.38            | 0.99             |
| 342           | 5/4/2011    | Outside Hose Bib On The East Side Of Home    | Valley               | Yes                                                  | 0.23                            | < 26        | 160             | 0.64        | < .001      | 11.4             | 0.042            | < .0002        | < 26         | 0.45                | < 4.6             | 7.22            | 1.1              |
| 343           | 5/4/2011    | Outdoor Spigot                               | Valley               | Yes                                                  | 1.57                            | < 26        | 117             | 0.088       | < .001      | 6.7              | 0.00076          | < .0002        | < 26         | 0.89                | < 4.6             | 7.22            | 1.1              |
| 344           | 2/26/2009   | Kitchen Sink                                 | Upland               |                                                      | 3.62                            | < .025      |                 | < .05       |             | 5.52             | < .025           |                | 0.44         |                     | < 5               | 7.16            |                  |

Table S.8. Groundwater Quality Data for 1701 "Pre-Drill" Water Well Samples from Susquehanna County, Pennsylvania

| Water Well ID | Sample Date | Sampling Port                   | Topographic Location | Gas Extraction Area (Within 1 km of Active Gas Well) | Dissolved Oxygen - Field (mg/L) | Ethane ug/L | Hardness (mg/L) | Iron (mg/L) | Lead (mg/L) | Magnesium (mg/L) | Manganese (mg/L) | Mercury (mg/L) | Methane ug/L | Nitrate as N (mg/L) | Oil Grease (mg/L) | pH - Field (SU) | Potassium (mg/L) |
|---------------|-------------|---------------------------------|----------------------|------------------------------------------------------|---------------------------------|-------------|-----------------|-------------|-------------|------------------|------------------|----------------|--------------|---------------------|-------------------|-----------------|------------------|
| 345           | 5/4/2011    | School Art Studio Bathroom Sink | Valley               | Yes                                                  | 4.78                            | < 26        | 125             | 0.33        | < .001      | 6.7              | 0.0046           | < .0002        | < 26         | 1.2                 | < 4.6             | 7.31            | 1.2              |
| 346           | 5/4/2011    | Pressure Tank                   | Valley               | Yes                                                  | 5.17                            | < 26        | 119             | 3.1         | 0.001       | 6.4              | 0.013            | < .0002        | < 26         | 1.1                 | < 4.6             | 7.64            | 1.1              |
| 347           | 5/5/2011    | Kitchen Sink Cwt                | Upland               | Yes                                                  | 7.55                            | < 26        | 145             | 0.13        | < .001      | 11.2             | 0.51             | < .0002        | < 26         | < .05               | < 4.6             | 7.37            | 1                |
| 348           | 5/5/2011    | Kitchen Sink                    | Valley               | Yes                                                  | 71.3                            | < 26        | 140             | 0.27        | < .001      | 9.6              | 0.005            | < .0002        | < 26         | 0.083               | < 4.7             | 7.59            | 0.94             |
| 349           | 5/5/2011    | Pressure Tank                   | Valley               | Yes                                                  | 1.45                            | < 26        | 128             | 0.73        | 0.0017      | 7.8              | 0.37             | < .0002        | < 26         | 0.65                | < 5               | 7.05            | 0.93             |
| 350           | 5/5/2011    | Kitchen Sink Cwt                | Valley               | Yes                                                  | 6.2                             | < 26        | 110             | < .05       | < .001      | 6                | 0.049            | < .0002        | < 26         | 0.94                | < 4.7             | 7.27            | 0.75             |
| 351           | 5/5/2011    | Pressure Tank                   | Valley               | Yes                                                  | 0.52                            | < 26        | 155             | 1           | 0.005       | 11.3             | 0.0058           | < .0002        | < 26         | 0.062               | < 4.6             | 7.75            | 1.2              |
| 352           | 5/6/2011    | Pressure Tank                   | Valley               | Yes                                                  | 0.74                            | < 26        | 170             | 0.14        | < .001      | 11.6             | 0.46             | < .0002        | < 26         | 0.081               | < 4.7             | 7.42            | 1.1              |
| 353           | 5/6/2011    | Kitchen Sink                    | Valley               | Yes                                                  | 2.86                            | < 26        | 115             | < .05       | < .001      | 6.3              | < .0005          | < .0002        | < 26         | 0.99                | < 4.6             | 7.76            | 1.5              |
| 354           | 5/7/2011    | Pressure Tank In Basement       | Valley               | Yes                                                  | 0.07                            | < 26        | 120             | 2.3         | < .001      | 8.1              | 0.01             | < .0002        | < 26         | 0.099               | < 4.8             | 7.65            | 1.1              |
| 355           | 5/7/2011    | Bathroom Sink Ctw               | Valley               | Yes                                                  | 0.77                            | < 26        | 127             | < .05       | < .001      | 8.6              | 0.0015           | < .0002        | < 26         | 0.063               | < 5               | 7.69            | 0.99             |
| 356           | 5/7/2011    | Backroom Sink                   | Valley               | Yes                                                  | 4.54                            | < 26        | 116             | 0.27        | < .001      | 7.1              | 0.009            | < .0002        | < 26         | 0.077               | < 4.7             | 7.58            | 0.91             |
| 357           | 5/7/2011    | Pressure Tank In Basement       | Upland               | Yes                                                  | 0.37                            | < 26        | 125             | 0.11        | 0.001       | 8.3              | 0.01             | < .0002        | < 26         | 0.052               | < 4.6             | 7.67            | 0.94             |
| 358           | 5/7/2011    | Kitchen Sink                    | Valley               | Yes                                                  | 3.69                            | < 26        | 138             | 0.25        | 0.001       | 4                | 0.028            | < .0002        | < 26         | 9.6                 | < 4.7             | 6.41            | 3.1              |
| 359           | 5/7/2011    | Pressure Tank                   | Valley               | Yes                                                  | 6.6                             | < 26        | 137             | < .05       | < .001      | 7.4              | < .0005          | < .0002        | < 26         | 4.7                 | < 4.7             | 6.62            | 1.2              |
| 360           | 5/9/2011    | Pressure Tank                   | Valley               | Yes                                                  | 2.25                            | < 26        | 115             | 0.45        | 0.0014      | 7                | 0.028            | < .0002        | < 26         | 0.85                | < 4.6             | 7.1             | 1.1              |
| 361           | 5/9/2011    | Basement Pressure Tank          | Valley               | Yes                                                  | 1.04                            | < 26        | 133             | 2.8         | < .001      | 7.3              | 0.1              | < .0002        | < 26         | 0.81                | < 4.6             | 7.21            | 1.2              |
| 362           | 5/9/2011    | Well                            | Valley               | Yes                                                  |                                 | < 26        | 60.8            | < .05       | 0.011       | 3.5              | 0.0018           | < .0002        | < 26         | 2.4                 | < 4.7             |                 | 1.5              |
| 363           | 5/9/2011    | Kitchen Sink                    | Valley               | Yes                                                  | 4.8                             | < 26        | 135             | 0.059       | < .001      | 8.5              | 0.014            | < .0002        | < 26         | 0.42                | < 4.8             | 7.57            | 1.1              |

Table S.8. Groundwater Quality Data for 1701 "Pre-Drill" Water Well Samples from Susquehanna County, Pennsylvania

| Water Well ID | Sample Date | Sampling Port                                 | Topographic Location | Gas Extraction Area (Within 1 km of Active Gas Well) | Dissolved Oxygen - Field (mg/L) | Ethane ug/L | Hardness (mg/L) | Iron (mg/L) | Lead (mg/L) | Magnesium (mg/L) | Manganese (mg/L) | Mercury (mg/L) | Methane ug/L | Nitrate as N (mg/L) | Oil Grease (mg/L) | pH - Field (SU) | Potassium (mg/L) |
|---------------|-------------|-----------------------------------------------|----------------------|------------------------------------------------------|---------------------------------|-------------|-----------------|-------------|-------------|------------------|------------------|----------------|--------------|---------------------|-------------------|-----------------|------------------|
| 364           | 5/9/2011    | Outdoor Hose Bib On South Side Of Gas Station | Valley               | Yes                                                  | 157                             | < 26        | 122             | 0.34        | < .001      | 8.2              | 0.18             | < .0002        | < 26         | < .05               | < 4.7             | 7.43            | 0.98             |
| 365           | 5/9/2011    | Outside Spigot                                | Valley               | Yes                                                  | 3.34                            | < 26        | 136             | 0.1         | < .001      | 8.6              | < .0005          | < .0002        | < 26         | 0.43                | < 4.6             | 7.52            | 1.2              |
| 366           | 5/9/2011    | Pressure Tank                                 | Upland               | Yes                                                  |                                 | < 26        | 90.2            | 2.3         | 0.034       | 5.3              | 0.022            | < .0002        | < 26         | 1.4                 | < 4.7             |                 | 1                |
| 367           | 5/9/2011    | Pressure Tank                                 | Valley               | Yes                                                  | 7.31                            | < 26        | 93.4            | < .05       | 0.0016      | 5.3              | 0.013            | < .0002        | < 26         | 3.6                 | < 4.7             | 6.2             | 1.6              |
| 368           | 5/9/2011    | Outside Faucet                                | Valley               | Yes                                                  | 0.57                            | < 26        | 119             | 0.58        | < .001      | 7.8              | 0.17             | < .0002        | < 26         | < .05               | < 4.8             | 7.43            | 0.94             |
| 369           | 5/10/2011   | Kitchen Sink                                  | Upland               | Yes                                                  | 5.35                            | < 26        | 27              | 0.19        | 0.0036      | 1.1              | 0.017            | < .0002        | < 26         | 0.18                | < 4.6             | 6.6             | 0.65             |
| 370           | 5/10/2011   | Inside Faucet                                 | Valley               | Yes                                                  | 3.9                             | < 26        | 84.9            | 0.25        | 0.0013      | 4.4              | 0.0029           | < .0002        | < 26         | 1.5                 | < 4.6             | 6.47            | 1                |
| 371           | 5/10/2011   | Inside Faucet                                 | Valley               | Yes                                                  | 2.55                            | < 26        | 124             | 0.2         | < .001      | 8.3              | 0.018            | < .0002        | < 26         | 0.35                | < 4.6             | 7.56            | 0.9              |
| 372           | 5/11/2011   |                                               | Valley               | Yes                                                  |                                 | < 26        | 38.3            | 0.3         | < .001      | 2.1              | 0.069            | < .0002        | < 26         | 0.36                | < 4.7             |                 | 1.9              |
| 373           | 5/11/2011   | Pressure Tank In Basement                     | Valley               | Yes                                                  | 1.99                            | < 26        | 152             | 0.58        | < .001      | 10.6             | 0.0098           | < .0002        | < 26         | 0.84                | < 4.8             | 7.25            | 1.4              |
| 374           | 5/11/2011   |                                               | Valley               | Yes                                                  |                                 | < 26        | 84.4            | 0.21        | 0.0023      | 5.1              | 0.0062           | < .0002        | < 26         | 2.6                 | < 4.6             |                 | 1.6              |
| 375           | 5/11/2011   | Kitchen Sink                                  | Valley               | Yes                                                  | 16.8                            | < 26        | 55.3            | 0.097       | 0.0038      | 3.5              | 0.0026           | < .0002        | < 26         | 2.5                 | < 4.7             | 6.09            | 1                |
| 376           | 5/11/2011   | Outside Bib                                   | Valley               | Yes                                                  | 4.71                            | < 26        | 134             | 0.077       | < .001      | 9.5              | 0.0026           | < .0002        | < 26         | 1.1                 | < 4.8             | 7.59            | 1.2              |
| 377           | 5/11/2011   | Kitchen Sink                                  | Valley               | Yes                                                  | 4.75                            | < 26        | 107             | 0.14        | 0.0082      | 5.3              | 0.0013           | < .0002        | < 26         | 1.5                 | < 4.6             | 6.85            | 1.1              |
| 378           | 5/11/2011   | Pressure Tank In Basement                     | Valley               | Yes                                                  | 17.2                            | < 26        | 106             | 0.22        | < .001      | 6.1              | 0.016            | < .0002        | < 26         | 2.2                 | < 4.8             | 6.58            | 1.1              |
| 379           | 5/12/2011   |                                               | Valley               | Yes                                                  |                                 | < 26        | 117             | 0.16        | < .001      | 7.4              | 0.0017           | < .0002        | < 26         | 0.97                | < 4.7             |                 | 1.1              |

Table S.8. Groundwater Quality Data for 1701 "Pre-Drill" Water Well Samples from Susquehanna County, Pennsylvania

| Water Well ID | Sample Date | Sampling Port                        | Topographic Location | Gas Extraction Area (Within 1 km of Active Gas Well) | Dissolved Oxygen - Field (mg/L) | Ethane ug/L | Hardness (mg/L) | Iron (mg/L) | Lead (mg/L) | Magnesium (mg/L) | Manganese (mg/L) | Mercury (mg/L) | Methane ug/L | Nitrate as N (mg/L) | Oil Grease (mg/L) | pH - Field (SU) | Potassium (mg/L) |
|---------------|-------------|--------------------------------------|----------------------|------------------------------------------------------|---------------------------------|-------------|-----------------|-------------|-------------|------------------|------------------|----------------|--------------|---------------------|-------------------|-----------------|------------------|
| 380           | 5/12/2011   | Outside Faucet                       | Valley               | Yes                                                  | 4.1                             | < 26        | 67.4            | < .05       | 0.0021      | 4.2              | 0.0047           | < .0002        | < 26         | 3.4                 | < 4.6             | 5.87            | 1.1              |
| 381           | 5/12/2011   | Basement At Pressure Tank            | Valley               | Yes                                                  | 3.33                            | < 26        | 105             | < .05       | 0.0025      | 5.7              | 0.0015           | < .0002        | < 26         | 0.81                | < 4.8             | 7.18            | 0.86             |
| 382           | 5/12/2011   | Pressure Tank                        | Valley               | Yes                                                  | 2.19                            | < 26        | 209             | 1.3         | 0.0039      | 11.4             | 0.46             | < .0002        | < 26         | 0.45                | < 4.7             | 6.16            | 1.4              |
| 383           | 5/12/2011   | Kitchen Sink                         | Valley               | Yes                                                  | 52.8                            | < 26        | 116             | 0.37        | < .001      | 7.3              | 0.002            | < .0002        | < 26         | 2                   | < 4.6             | 6.72            | 1.1              |
| 384           | 5/13/2011   | Pressure Tank Rental Property        | Valley               | Yes                                                  | 1.42                            | < 26        | 132             | < .05       | 0.0016      | 9.6              | < .0005          | < .0002        | < 26         | 2.5                 | < 4.7             | 6.57            | 0.88             |
| 385           | 5/13/2011   | Pressure Tank                        | Valley               | Yes                                                  | 0.011                           | < 26        | 139             | < .05       | < .001      | 10.1             | 0.0081           | < .0002        | < 26         | 0.081               | < 4.7             | 7.75            | 1.2              |
| 386           | 5/13/2011   | Kitchen Sink                         | Valley               | Yes                                                  | 5.6                             | < 26        | 78.9            | 0.093       | 0.0031      | 5                | 0.0063           | < .0002        | < 26         | 2.9                 | < 4.7             | 6.22            | 1.3              |
| 387           | 5/13/2011   | Outside Faucet                       | Valley               | Yes                                                  | 0.08                            | < 26        | 159             | 0.45        | < .001      | 11.2             | 0.052            | < .0002        | < 26         | < .05               | < 4.7             | 7.51            | 1.3              |
| 388           | 1/31/2011   | Kitchen Sink                         | Valley               |                                                      | 4.3                             | < .025      | 121.6792        | < .05       | < .0003     | 5.9              | < .0025          | < .0002        | 0.3          | < 1                 | < 5               | 7.02            | 1                |
| 389           | 1/8/2011    | Kitchen Sink                         | Upland               | Yes                                                  | 5.72                            | < .025      | 113.4432        | 0.1         | < .0003     | 3.9              | < .0025          | < .0002        | < .1         | < 1                 | < 5               | 7.16            | 1.4              |
| 390           | 1/8/2011    | Kitchen Sink                         | Valley               |                                                      | 8.24                            | < .025      | 41.9586         | < .05       | 0.00068     | 1.7              | < .0025          | < .0002        | 0.13         | < 1                 | < 5               | 6.73            | < 1              |
| 391           | 1/4/2011    | Kitchen Sink                         | Valley               | Yes                                                  |                                 | < .025      | 60.5158         | < .05       | 0.00071     | 5.6              | < .0025          | < .0002        | < .1         | < 1                 | < 5               |                 | 1.1              |
| 392           | 2/17/2011   | Outside Spigot                       | Upland               |                                                      | 11.77                           | < .025      | 9.3617          | < .05       | 0.00075     | < .5             | < .0025          | < .0002        | 40           | < 1                 | < 5               | 8.26            | 1.6              |
| 393           | 2/22/2011   | Kitchen Sink                         | Upland               | Yes                                                  | 13.56                           | < .025      | 149.4532        | < .05       | 0.00041     | 8.4              | 0.0025           | < .0002        | < .1         | < 1                 | < 5               | 6.87            | 2.8              |
| 394           | 2/22/2011   | Pressure Tank In Barn, Old Milkhouse | Upland               |                                                      | 9.23                            | < .025      | 178.384         | 0.053       | 0.0013      | 13               | 0.0025           | < .0002        | < .1         | < 1                 | < 5               | 6.67            | 1.6              |
| 395           | 2/22/2011   | Rental Kitchen Sink                  | Upland               |                                                      | 7.31                            | < .025      | 194.242         | 0.11        | 0.00041     | 12               | 0.0025           | < .0002        | 0.16         | < 1                 | < 5               | 6.91            | 1.8              |
| 396           | 1/8/2011    | Basement At Pressure Tank            | Valley               | Yes                                                  | 8.59                            | < .025      | 84.6098         | 0.21        | 0.013       | 6.6              | 0.0048           | < .0002        | < .1         | < 1                 | < 5               | 6.6             | 1.3              |
| 397           | 1/31/2011   | Kitchen Sink                         | Valley               |                                                      | 9.31                            | < .025      | 31.9706         | 0.72        | 0.0019      | 1.7              | 0.011            | < .0002        | 1.2          | < 1                 | < 5               | 6.36            | < 1              |

Table S.8. Groundwater Quality Data for 1701 "Pre-Drill" Water Well Samples from Susquehanna County, Pennsylvania

| Water Well ID | Sample Date | Sampling Port                       | Topographic Location | Gas Extraction Area (Within 1 km of Active Gas Well) | Dissolved Oxygen - Field (mg/L) | Ethane ug/L | Hardness (mg/L) | Iron (mg/L) | Lead (mg/L) | Magnesium (mg/L) | Manganese (mg/L) | Mercury (mg/L) | Methane ug/L | Nitrate as N (mg/L) | Oil Grease (mg/L) | pH - Field (SU) | Potassium (mg/L) |
|---------------|-------------|-------------------------------------|----------------------|------------------------------------------------------|---------------------------------|-------------|-----------------|-------------|-------------|------------------|------------------|----------------|--------------|---------------------|-------------------|-----------------|------------------|
| 398           | 1/9/2011    | Hand Dug Well West Of House         | Upland               | Yes                                                  | 9.77                            | < .025      | 28.65           | < .05       | < .0003     | 1.5              | 0.0056           | < .0002        | 1.1          | < 1                 | < 5               | 5.42            | < 1              |
| 399           | 1/4/2011    | Pressure Tank                       | Upland               |                                                      | 8.76                            | < .025      | 117.9468        | < .05       | 0.0014      | 5.6              | < .0025          | < .0002        | < .05        | < 1                 | < 5               | 7.8             | 1.2              |
| 400           | 3/12/2009   | Kitchen Sink                        | Valley               |                                                      | 2.86                            | < .025      |                 | < .05       |             | 7.86             | 0.03             |                | 1.1          |                     | < 5               | 7.93            |                  |
| 401           | 1/31/2011   | Kitchen Sink                        | Upland               | Yes                                                  | 2.64                            | < .025      | 150.3816        | < .05       | 0.00059     | 6.2              | 0.93             | < .0002        | 220          | < 1                 | < 5               | 6.61            | 1.1              |
| 402           | 2/22/2011   | Upstairs Kitchen Sink               | Upland               |                                                      | 4.4                             | < .025      | 119.9534        | 0.078       | < .0003     | 7.3              | 0.0079           | < .0002        | 2.2          | < 1                 | < 5               | 6.53            | < 1              |
| 403           | 1/31/2011   | Kitchen Sink                        | Upland               | Yes                                                  | 9.45                            | < .025      | 97.8922         | < .05       | < .0003     | 7.4              | < .0025          | < .0002        | 0.46         | < 1                 | < 5               | 7.11            | 1.2              |
| 404           | 1/31/2011   | Kitchen Sink                        | Upland               |                                                      | 4.35                            | < .025      | 27.5898         | < .05       | < .0003     | 1                | 0.0093           | < .0002        | 170          | < 1                 | < 5               | 8.18            | 2.2              |
| 405           | 1/4/2011    | Hand Dug Well                       | Upland               |                                                      | 8.13                            | < .025      | 20.85052        | < .05       | 0.00034     | 0.94             | 0.0037           | < .0002        | 0.68         | < 1                 | < 5               | 6.57            | 0.14             |
| 406           | 2/22/2011   | Basement Of Rental At Pressure Tank | Upland               |                                                      | 9.26                            | < .025      | 179.26          | 0.57        | 0.0039      | 12               | 0.25             | < .0002        | 0.58         | < 1                 | < 5               | 7.03            | 1.3              |
| 407           | 1/8/2011    | Basement At Pressure Tank           | Upland               |                                                      | 8.35                            | < .025      | 76.4262         | < .05       | 0.0006      | 3.4              | < .0025          | < .0002        | 0.46         | < 1                 | < 5               | 6.66            | < 1              |
| 408           | 1/8/2011    | Kithcen Sink                        | Upland               |                                                      | 6.13                            | < .025      | 82.6556         | < .05       | < .0003     | 3.7              | < .0025          | < .0002        | < .1         | < 1                 | < 5               | 6.96            | < 1              |
| 409           | 1/14/2011   | Laundry Room Sink                   | Upland               |                                                      | 7.18                            | < .025      | 114.6262        | < .05       | < .0003     | 5.4              | < .0025          | < .0002        | 0.16         | < 1                 | < 5               | 7.36            | 1                |
| 410           | 3/12/2009   | Kitchen Sink                        | Valley               |                                                      | 3.36                            | < .025      |                 | < .05       |             | 8.49             | 0.026            |                | 0.6          |                     | 5                 | 7.9             |                  |
| 411           | 1/31/2011   | Kitchen Sink                        | Valley               |                                                      | 7.6                             | < .025      | 57.3262         | < .05       | 0.00059     | 2.4              | 0.0033           | < .0002        | 16           | < 1                 | < 5               | 6.68            | 1.4              |
| 412           | 2/22/2011   | Breakroom Sink- Lower Level         | Upland               |                                                      | 2.73                            | 0.048       | 172.645         | < .05       | 0.0003      | 11               | 0.0087           | < .0002        | 1.5          | < 1                 | < 5               | 6.96            | 3.2              |
| 413           | 3/16/2009   | Kitchen Sink                        | Valley               |                                                      | 2.59                            | < .025      |                 | < .05       |             | 9.93             | < .025           |                | 2.3          |                     | < 5               | 7.62            |                  |
| 414           | 1/8/2011    | Kitchen Sink                        | Valley               | Yes                                                  | 3.44                            | < .025      | 121.215         | 0.66        | < .0003     | 7                | 0.052            | < .0002        | 2.7          | < 1                 | < 5               | 6.63            | < 1              |
| 415           | 1/4/2011    | Kitchen Sink                        | Upland               |                                                      | 8.7                             | < .025      | 48.5998         | 0.052       | 0.0054      | 2.1              | < .0025          | < .0002        | 0.83         | < 1                 | < 5               | 6.5             | 1.2              |
| 416           | 1/31/2011   | Kitchen Sink                        | Valley               | Yes                                                  | 10.01                           | < .025      | 86.3094         | < .05       | < .0003     | 5.8              | 0.011            | < .0002        | 2.5          | < 1                 | < 5               | 6.61            | 1.3              |
| 417           | 1/10/2011   | Hand Dug Well                       | Upland               |                                                      | 6.39                            | < .025      | 42.8084         | 0.1         | < .0003     | 1.3              | 0.0053           | < .0002        | 0.84         | < 1                 | < 5               | 5.96            | < 1              |
| 418           | 2/22/2011   | Kitchen Sink                        | Valley               |                                                      | 6.23                            | < .025      | 82.2438         | 0.15        | 0.00079     | 3.6              | 0.013            | < .0002        | 1.8          | < 1                 | < 5               | 6.74            | 2                |

Table S.8. Groundwater Quality Data for 1701 "Pre-Drill" Water Well Samples from Susquehanna County, Pennsylvania

| Water Well ID | Sample Date | Sampling Port                                        | Topographic Location | Gas Extraction Area (Within 1 km of Active Gas Well) | Dissolved Oxygen - Field (mg/L) | Ethane ug/L | Hardness (mg/L) | Iron (mg/L) | Lead (mg/L) | Magnesium (mg/L) | Manganese (mg/L) | Mercury (mg/L) | Methane ug/L | Nitrate as N (mg/L) | Oil Grease (mg/L) | pH - Field (SU) | Potassium (mg/L) |
|---------------|-------------|------------------------------------------------------|----------------------|------------------------------------------------------|---------------------------------|-------------|-----------------|-------------|-------------|------------------|------------------|----------------|--------------|---------------------|-------------------|-----------------|------------------|
| 419           | 1/10/2011   | Kitchen Sink                                         | Valley               |                                                      | 3.64                            | < .025      | 172.3118        | < .05       | 0.0041      | 9.1              | 0.038            | < .0002        | 1.2          | < 1                 | < 5               | 6.93            | 2                |
| 420           | 1/4/2011    |                                                      | Upland               |                                                      |                                 | < .025      | 71.0204         | < .05       | < .0003     | 3.3              | < .0025          | < .0002        | 0.12         | < 1                 | < 5               |                 | 1.4              |
| 421           | 2/17/2011   | Kitchen Faucet On 2Nd Floor                          | Upland               |                                                      | 8.911                           | < .025      | 80.5704         | < .05       | < .0003     | 3.8              | < .0025          | < .0002        | < .1         | < 1                 | < 5               | 6.99            | 1.1              |
| 422           | 1/4/2011    |                                                      | Upland               | Yes                                                  |                                 | 0.056       | 105.3046        | 0.13        | < .0003     | 9.2              | < .0025          | < .0002        | 49           | < 1                 | < 5               |                 | 2.1              |
| 423           | 1/7/2011    | Milkhouse Faucet                                     | Valley               | Yes                                                  | 5.43                            | < .025      | 134.314         | < .05       | < .0003     | 12               | < .0025          | < .0002        | 0.13         | < 1                 | < 5               | 7.07            | 2                |
| 424           | 1/7/2011    | Kitchen Sink Rental                                  | Upland               | Yes                                                  | 3.72                            | < .025      | 119.901         | 0.27        | 0.002       | 8.5              | 0.13             | < .0002        | 0.61         | < 1                 | < 5               | 7.45            | 1.3              |
| 425           | 10/8/2009   |                                                      | Upland               |                                                      |                                 |             |                 | 0.548       |             | 5.59             | < .025           |                | < 1          |                     |                   |                 |                  |
| 426           | 3/13/2009   | Kitchen Sink                                         | Valley               |                                                      | 1.71                            | 6.1         |                 | < .05       |             | 3.92             | 0.059            |                | 15000        |                     | < 5               | 8.26            |                  |
| 427           | 3/12/2009   | Kitchen Sink                                         | Upland               |                                                      | 2.55                            | < .025      |                 | < .05       |             | 2.03             | < .025           |                | 2.4          |                     |                   | 8.71            |                  |
| 428           | 6/24/2009   |                                                      | Upland               | Yes                                                  |                                 | < .025      |                 | < .025      |             | 1.16             | < .025           |                | 0.24         |                     |                   |                 |                  |
| 429           | 3/4/2009    |                                                      | Upland               |                                                      |                                 | <0.025      |                 | 0.046       |             | 5.94             | <0.025           |                | 1.7          |                     |                   |                 |                  |
| 430           | 6/13/2011   | Barn Spigot                                          | Upland               |                                                      | 10.11                           | < .025      |                 |             |             |                  |                  |                | 0.14         |                     |                   | 6.52            |                  |
| 431           | 6/14/2011   | Kitchen Sink Overlooking Road                        | Upland               |                                                      | 4.34                            | < .025      |                 |             |             |                  |                  |                | 0.12         |                     |                   | 7.12            |                  |
| 432           | 6/14/2011   | Pressure Tank                                        | Valley               |                                                      | 4.61                            | 0.093       |                 |             |             |                  |                  |                | 0.45         |                     |                   | 6.41            |                  |
| 433           | 6/16/2011   | Kitchen Sink On Island In Kitchen                    | Valley               |                                                      | 3.54                            | < .025      |                 |             |             |                  |                  |                | 0.16         |                     |                   | 7.25            |                  |
| 434           | 6/16/2011   | Kitchen Sink                                         | Valley               |                                                      | 17.95                           | < .025      |                 |             |             |                  |                  |                | 0.13         |                     |                   | 7.24            |                  |
| 435           | 6/16/2011   | In Barn Milkhouse- At Sink                           | Valley               |                                                      | 7.82                            | < .025      |                 |             |             |                  |                  |                | 6.1          |                     |                   | 7.4             |                  |
| 436           | 6/16/2011   | Outside Spigot- Next To Porch At End Of Driveway     | Upland               |                                                      | 14.22                           | < .025      |                 |             |             |                  |                  |                | 0.16         |                     |                   | 7.3             |                  |
| 437           | 6/16/2011   | Kitchen Sink On Lake Road Side Of House Under Window | Valley               |                                                      | 4.94                            | < .025      |                 |             |             |                  |                  |                | 0.28         |                     |                   | 7.12            |                  |
| 438           | 6/17/2011   | Kitchen Sink                                         | Valley               |                                                      | 3.87                            | 0.29        |                 |             |             |                  |                  |                | 1200         |                     |                   | 6.8             |                  |

Table S.8. Groundwater Quality Data for 1701 "Pre-Drill" Water Well Samples from Susquehanna County, Pennsylvania

| Water Well ID | Sample Date | Sampling Port                                         | Topographic Location | Gas Extraction Area (Within 1 km of Active Gas Well) | Dissolved Oxygen - Field (mg/L) | Ethane ug/L | Hardness (mg/L) | Iron (mg/L) | Lead (mg/L) | Magnesium (mg/L) | Manganese (mg/L) | Mercury (mg/L) | Methane ug/L | Nitrate as N (mg/L) | Oil Grease (mg/L) | pH - Field (SU) | Potassium (mg/L) |
|---------------|-------------|-------------------------------------------------------|----------------------|------------------------------------------------------|---------------------------------|-------------|-----------------|-------------|-------------|------------------|------------------|----------------|--------------|---------------------|-------------------|-----------------|------------------|
| 439           | 6/23/2011   | Kitchen Sink                                          | Valley               |                                                      |                                 | <0.025      |                 |             |             |                  |                  |                | 0.34         |                     |                   |                 |                  |
| 440           | 6/23/2011   | Pressure Tank                                         | Upland               |                                                      | 4.47                            | < .025      |                 |             |             |                  |                  |                | 0.16         |                     |                   | 6.69            |                  |
| 441           | 6/23/2011   | Pressure Tank                                         | Valley               |                                                      | 3.3                             | < .025      |                 |             |             |                  |                  |                | 0.1          |                     |                   | 6.58            |                  |
| 442           | 6/24/2011   |                                                       | Valley               |                                                      |                                 | < .025      |                 |             |             |                  |                  |                | 24           |                     |                   |                 |                  |
| 443           | 6/24/2011   | Kitchen Sink                                          | Upland               |                                                      | 3.98                            | < .025      |                 |             |             |                  |                  |                | 0.48         |                     |                   | 7.27            |                  |
| 444           | 6/24/2011   | Kitchen Sink                                          | Valley               |                                                      | 3.15                            | < .025      |                 |             |             |                  |                  |                | 12           |                     |                   | 7.65            |                  |
| 445           | 6/24/2011   | Kitchen Sink                                          | Upland               |                                                      | 2.71                            | 0.08        |                 |             |             |                  |                  |                | 290          |                     |                   | 7.76            |                  |
| 446           | 6/24/2011   | Shed Spigot                                           | Valley               |                                                      | 6.56                            | < .025      |                 |             |             |                  |                  |                | 36           |                     |                   | 7.37            |                  |
| 447           | 6/13/2011   | Kitchen Faucet                                        | Upland               |                                                      |                                 | < .025      |                 |             |             |                  |                  |                | 0.81         |                     |                   |                 |                  |
| 448           | 6/15/2011   | Kitchen Sink Near Rear Of House                       | Upland               |                                                      | 8.83                            | < .025      |                 |             |             |                  |                  |                | 1.1          |                     |                   | 6.3             |                  |
| 449           | 6/15/2011   | Kitchen Sink On South Side Of House                   | Upland               |                                                      | 8.18                            | < .025      |                 |             |             |                  |                  |                | 0.33         |                     |                   | 6.58            |                  |
| 450           | 6/15/2011   | Kitchen Sink On Wall Closest To Red Barn Behind House | Upland               |                                                      | 6.32                            | < .025      |                 |             |             |                  |                  |                | 0.14         |                     |                   | 6.85            |                  |
| 451           | 6/15/2011   | Kitchen Sink                                          | Valley               |                                                      | 9.33                            | < .025      |                 |             |             |                  |                  |                | < .1         |                     |                   | 6.29            |                  |
| 452           | 6/15/2011   | Outside Spigot- On The North Side Of The Residence    | Upland               |                                                      | 16.21                           | < .025      |                 |             |             |                  |                  |                | 0.15         |                     |                   | 6.52            |                  |
| 453           | 6/15/2011   |                                                       | Upland               |                                                      |                                 | < .025      |                 |             |             |                  |                  |                | 0.23         |                     |                   |                 |                  |
| 454           | 3/25/2009   | Kitchen Sink                                          | Upland               |                                                      | 8.66                            | < .025      |                 | < .05       |             | 7.58             | < .025           |                | 0.2          |                     | < 5               | 7.91            |                  |
| 455           | 6/27/2011   | Greenhouse Sink                                       | Valley               |                                                      | 7.5                             | < .025      |                 |             |             |                  |                  |                | 0.13         |                     |                   | 7.2             |                  |
| 456           | 4/15/2009   | Kitchen Sink                                          | Valley               |                                                      | 7.23                            | < .025      |                 | 0.119       |             | 3.74             | < .025           |                | 0.43         |                     | < 5               | 6.64            |                  |
| 457           | 4/19/2009   | Basement Pressure Tank                                | Valley               |                                                      | 7.55                            | < .025      |                 | < .025      |             | 4.18             | < .025           |                | 4.1          |                     | < 5               | 7.13            |                  |
| 458           | 6/13/2011   | Outside Hose Bib                                      | Valley               | Yes                                                  | 7.81                            | < 26        | 70              | 0.054       | < .001      | 3.5              | 0.0012           | < .0002        | < 26         | 0.83                |                   | 6.38            | 1.1              |

Table S.8. Groundwater Quality Data for 1701 "Pre-Drill" Water Well Samples from Susquehanna County, Pennsylvania

| Water Well ID | Sample Date | Sampling Port                         | Topographic Location | Gas Extraction Area (Within 1 km of Active Gas Well) | Dissolved Oxygen - Field (mg/L) | Ethane ug/L | Hardness (mg/L) | Iron (mg/L) | Lead (mg/L) | Magnesium (mg/L) | Manganese (mg/L) | Mercury (mg/L) | Methane ug/L | Nitrate as N (mg/L) | Oil Grease (mg/L) | pH - Field (SU) | Potassium (mg/L) |
|---------------|-------------|---------------------------------------|----------------------|------------------------------------------------------|---------------------------------|-------------|-----------------|-------------|-------------|------------------|------------------|----------------|--------------|---------------------|-------------------|-----------------|------------------|
| 459           | 6/13/2011   | Outside Cold Water Hose Bib           | Upland               | Yes                                                  | 0.14                            | < 26        | 150             | 0.059       | < .001      | 9.4              | 0.015            | < .0002        | 46.7         | < .05               |                   | 7.56            | 1.1              |
| 460           | 6/16/2011   | Bailed Directly From Well             | Upland               |                                                      | 1.85                            | < 26        | 34              | 0.39        | < .001      | 1.7              | 0.0079           | < .0002        | < 26         | 1.4                 | < 4.8             | 5.89            | 1                |
| 461           | 2/26/2009   | Mary Steele Kitchen Sink              | Valley               |                                                      | 9.81                            | < .025      |                 | < .025      |             | 3.62             | < .025           |                | 1.6          |                     | < 5               | 6.85            |                  |
| 462           | 6/16/2011   |                                       | Upland               |                                                      |                                 | <26         | 77              | <0.05       | <0.001      | 5.7              | 0.00092          | <0.0002        | <26          | 2.1                 | <4.7              |                 | 1.2              |
| 463           | 6/20/2011   | Kitchen Sink Cwt On Nw Side Of House  | Upland               |                                                      | 13.3                            | < 26        | 71              | < .05       | 0.0012      | 4.5              | 0.001            | < .0002        | < 26         | 3.7                 |                   | 7.54            | 0.82             |
| 464           | 6/20/2011   | Well                                  | Upland               |                                                      | 9.3                             | < 26        | 51              | 0.18        | 0.0012      | 3.4              | 0.0074           | < .0002        | < 26         | 2.6                 |                   | 6.85            | 0.92             |
| 465           | 1/25/2009   |                                       | Valley               |                                                      |                                 |             |                 | < .025      |             | 3.5              | < .01            |                | 9            |                     |                   |                 |                  |
| 466           | 6/20/2011   |                                       | Upland               | Yes                                                  |                                 | < 26        | 110             | < .05       | < .001      | 7.1              | 0.0094           | < .0002        | < 26         | < .05               |                   |                 | 1.9              |
| 467           | 6/21/2011   | At Pressure Tank In Basement          | Upland               | Yes                                                  | 3.64                            | < 26        | 61              | < .05       | 0.0013      | 2.6              | < .0005          | < .0002        | < 26         | 0.7                 |                   | 6.22            | 0.67             |
| 468           | 6/22/2011   | Inside Hose Bib Located In The Garage | Valley               |                                                      | 5.76                            | <26         | 72              | <4.8        | 0.0017      | 2.8              | 0.0055           | <0.0002        | <26          | 1.1                 |                   | 7.35            | 0.66             |
| 469           | 4/1/2009    |                                       | Valley               |                                                      |                                 | < .025      |                 | < .025      |             | 5.3              | < .025           |                | < .1         |                     | < 5               |                 |                  |
| 470           | 6/22/2011   | Outside Hose                          | Valley               |                                                      | 0.81                            | < 26        | 90              | 0.13        | < .001      | 5.4              | 0.01             | < .0002        | < 26         | 0.13                |                   | 7.82            | 1.3              |
| 471           | 6/22/2011   | Well                                  | Valley               | Yes                                                  | 0.12                            | < 26        | 150             | 0.17        | < .001      | 10               | 0.12             | < .0002        | < 26         | < .05               |                   | 8.55            | 1.4              |
| 472           | 6/22/2011   | Kitchen Sink Cwt                      | Valley               |                                                      | 2.43                            | < 26        | 75              | 0.2         | < .001      | 5.7              | 0.0024           | < .0002        | < 26         | < .05               |                   | 7.87            | 0.97             |
| 473           | 6/23/2011   | Pipe In Basement                      | Upland               |                                                      | 3.82                            | < 26        | 21              | 1.1         | < .001      | 0.98             | 0.46             | < .0002        | < 26         | < .05               |                   | 8.7             | 2.6              |
| 474           | 4/1/2009    |                                       | Valley               |                                                      |                                 | < .025      |                 | < .025      |             | 6.08             | < .025           |                | 0.25         |                     | < 5               |                 |                  |
| 475           | 6/23/2011   | Outside Spigot                        | Valley               |                                                      | 0.19                            | < 26        | 94              | < .05       | < .001      | 4.8              | < .0005          | < .0002        | < 26         | 0.67                |                   | 8.01            | 1.8              |
| 476           | 4/15/2009   | Kitchen Sink                          | Upland               |                                                      | 3.16                            | < .025      |                 | < .05       |             | 12.5             | < .025           |                | 0.6          |                     | < 5               | 7.7             |                  |
| 477           | 6/24/2011   | Kitchen Sink                          | Valley               |                                                      | 2.23                            | < 26        | 95              | 1.7         | 0.0013      | 4.4              | 0.055            | < .0002        | < 26         | 0.09                |                   | 8.34            | 1.5              |
| 478           | 6/24/2011   | Outside Hose Bib On The W End Of Home | Valley               | Yes                                                  | 3.09                            | < 26        | 130             | < .05       | < .001      | 8.1              | 0.0006           | < .0002        | < 26         | 1.9                 | < 4.7             | 7.51            | 1.2              |
| 479           | 4/15/2009   | Kitchen Sink                          | Upland               |                                                      | 3.98                            | < .025      |                 | < .05       |             | 10.3             | < .025           |                | 0.47         |                     | < 5               | 7.93            |                  |



Table S.8. Groundwater Quality Data for 1701 "Pre-Drill" Water Well Samples from Susquehanna County, Pennsylvania

| Water Well ID | Sample Date | Sampling Port                                                                                                                                                      | Topographic Location | Gas Extraction Area (Within 1 km of Active Gas Well) | Dissolved Oxygen - Field (mg/L) | Ethane ug/L | Hardness (mg/L) | Iron (mg/L) | Lead (mg/L) | Magnesium (mg/L) | Manganese (mg/L) | Mercury (mg/L) | Methane ug/L | Nitrate as N (mg/L) | Oil Grease (mg/L) | pH - Field (SU) | Potassium (mg/L) |
|---------------|-------------|--------------------------------------------------------------------------------------------------------------------------------------------------------------------|----------------------|------------------------------------------------------|---------------------------------|-------------|-----------------|-------------|-------------|------------------|------------------|----------------|--------------|---------------------|-------------------|-----------------|------------------|
| 480           | 3/16/2009   | Pressure Tank                                                                                                                                                      | Upland               |                                                      | 7.68                            | < .025      |                 | < .05       |             | 6.27             | < .025           |                | 0.12         |                     | < 5               | 7.92            |                  |
| 481           | 6/27/2011   | Sample Collected From An Outside Spigot Located On The North Side Of The House.                                                                                    | Valley               |                                                      | 0.07                            | < 26        | 68              | < .05       | < .001      | 5.5              | 0.082            | < .0002        | < 26         | < .05               |                   | 8.5             | 1.1              |
| 482           | 6/27/2011   | Kitchen Sink                                                                                                                                                       | Valley               |                                                      | 3.92                            | < 26        | 58              | < .05       | < .001      | 2.4              | < .0005          | < .0002        | < 26         | 0.34                |                   | 6.94            | 1.7              |
| 483           | 6/28/2011   | Dip Sample Directly From Well. Well Is Located On The South End Of Property Inside Of Electric Fence. It Is Covered With Metal Sheeting And An Old Car Hood Frame. | Upland               |                                                      | 0.84                            | < 26        | 92              | 0.48        | < .001      | 4.7              | 3.7              | < .0002        | < 26         | 0.055               |                   | 6.74            | 5.1              |
| 484           | 6/28/2011   | Kitchen Sink Cwt                                                                                                                                                   | Valley               |                                                      | 2.46                            | < 26        | 72              | < .05       | < .001      | 5.3              | 0.0011           | < .0002        | < 26         | 0.12                |                   | 9.04            | 1.3              |
| 485           | 6/29/2011   | Well                                                                                                                                                               | Upland               |                                                      | 6.94                            | < 26        | 44              | 1.2         | 0.0011      | 2.2              | 0.79             | < .0002        | < 26         | 1.2                 |                   | 6.8             | 1                |
| 486           | 6/29/2011   | Laundry Room Sink                                                                                                                                                  | Valley               |                                                      | 1.4                             | < 26        | 84              | 0.052       | < .001      | 4.6              | 0.022            | < .0002        | < 26         | 0.34                |                   | 8.38            | 1.7              |
| 487           | 6/29/2011   | Dug Well                                                                                                                                                           | Valley               |                                                      | 8.43                            | < 26        | 35              | < .05       | < .001      | 1.7              | < .0005          | < .0002        | < 26         | 1.2                 |                   | 6.32            | 0.83             |
| 488           | 6/29/2011   |                                                                                                                                                                    | Valley               |                                                      |                                 | < 26        | 48              | < .05       | < .001      | 2.4              | 0.00059          | < .0002        | < 26         | 1.9                 |                   |                 | 0.63             |
| 489           | 6/30/2011   | Pressure Tank                                                                                                                                                      | Upland               |                                                      | 7.77                            | < 26        | 58              | 0.66        | 0.002       | 2.9              | 0.0061           | < .0002        | < 26         | 2.3                 |                   | 6.59            | 0.57             |
| 490           | 7/1/2011    | Outside Hose Bib                                                                                                                                                   | Valley               |                                                      | 0.23                            | < 26        | 85              | 0.55        | < .001      | 5                | 0.2              | < .0002        | < 26         | 0.072               |                   | 7.63            | 1.1              |
| 491           | 2/12/2009   |                                                                                                                                                                    | Valley               |                                                      |                                 |             |                 | 0.238       |             | 17.4             | 0.171            |                | 9.4          |                     | < 5               |                 |                  |
| 492           | 5/7/2009    |                                                                                                                                                                    | Valley               |                                                      |                                 | <0.025      |                 | 6.96        |             | 6.14             | 0.156            |                | 0.16         |                     |                   |                 |                  |
| 493           | 4/26/2009   |                                                                                                                                                                    | Valley               |                                                      |                                 | 49          |                 | < .025      |             | 7.13             | < .025           |                | 39000        |                     | < 5               |                 |                  |

Table S.8. Groundwater Quality Data for 1701 "Pre-Drill" Water Well Samples from Susquehanna County, Pennsylvania

| Water Well ID | Sample Date | Sampling Port                                                     | Topographic Location | Gas Extraction Area (Within 1 km of Active Gas Well) | Dissolved Oxygen - Field (mg/L) | Ethane ug/L | Hardness (mg/L) | Iron (mg/L) | Lead (mg/L) | Magnesium (mg/L) | Manganese (mg/L) | Mercury (mg/L) | Methane ug/L | Nitrate as N (mg/L) | Oil Grease (mg/L) | pH - Field (SU) | Potassium (mg/L) |
|---------------|-------------|-------------------------------------------------------------------|----------------------|------------------------------------------------------|---------------------------------|-------------|-----------------|-------------|-------------|------------------|------------------|----------------|--------------|---------------------|-------------------|-----------------|------------------|
| 494           | 7/5/2011    | Kitchen Sink                                                      | Valley               |                                                      | 6.03                            | < 26        | 96              | 0.29        | < .001      | 4.1              | 0.011            | < .0002        | < 26         | 1.1                 |                   | 7.63            | 0.94             |
| 495           | 7/5/2011    | Samples Collected By Dipping 1 Inch Plastic Bailer Down The Well. | Upland               |                                                      | 6.95                            | < 26        | 95              | 24          | 0.076       | 6.8              | 1.3              | < .0002        | < 26         | 0.64                |                   | 7.62            | 3.1              |
| 496           | 7/5/2011    | Outside Hose Bib On South Of House                                | Valley               |                                                      | 0.09                            | < 26        | 160             | 0.59        | 0.0019      | 6.8              | 2.3              | < .0002        | < 26         | < .05               |                   | 7.24            | 1.1              |
| 497           | 7/6/2011    | Pressure Tank In Basement                                         | Upland               |                                                      | 4.77                            | < 26        | 120             | < .05       | < .001      | 5.5              | 0.011            | < .0002        | < 26         | 0.57                |                   | 7.1             | 1.3              |
| 498           | 7/8/2011    | Outside Faucet                                                    | Upland               |                                                      | 6.06                            | < 26        | < .67           | < .05       | < .001      | < .1             | 0.0036           | < .0002        | < 26         | 0.99                |                   | 6.44            | 0.13             |
| 499           | 5/14/2011   | Kitchen Sink                                                      | Valley               | Yes                                                  | 2.78                            | < 26        | 140             | < .05       | < .001      | 9.6              | 0.016            | < .0002        | < 26         | 0.073               |                   | 7.53            | 1.3              |
| 500           | 5/3/2009    | Bathroom Sink                                                     | Upland               |                                                      | 9.7                             | < .025      |                 | < .05       |             | 8.48             | < .025           |                | < .1         |                     | < 5               | 7.6             |                  |
| 501           | 5/19/2011   | Outside Spigot                                                    | Valley               | Yes                                                  | 7.77                            | < 26        | 90              | < .05       | 0.0015      | 5.3              | 0.0019           | < .0002        | < 26         | 2.4                 |                   | 6.24            | 2                |
| 502           | 5/25/2011   | Pressure Tank                                                     | Valley               | Yes                                                  | 0.16                            | < 26        | 160             | 0.59        | < .001      | 12               | 0.023            | < .0002        | < 26         | 0.1                 |                   | 7.42            | 1.5              |
| 503           | 5/26/2011   | Pressure Tank                                                     | Valley               | Yes                                                  | 0.23                            | < 26        | 180             | < .05       | < .001      | 10               | 0.009            | < .0002        | < 26         | 0.42                |                   | 7.43            | 1.1              |
| 504           | 10/26/2009  |                                                                   | Valley               |                                                      |                                 |             |                 | 0.716       |             | 4.26             | 0.139            |                | 37           |                     |                   |                 |                  |
| 505           | 5/26/2011   | Outside Hose Bib Cold                                             | Valley               | Yes                                                  | 2.6                             | < 26        | 120             | < .05       | < .001      | 6.1              | < .0005          | < .0002        | < 26         | 1.1                 |                   | 7.23            | 1.2              |
| 506           | 10/26/2009  |                                                                   | Valley               | Yes                                                  |                                 |             |                 | 0.13        |             | 6.23             | < .025           |                | 2.5          |                     |                   |                 |                  |
| 507           | 6/1/2011    | Outside Hose                                                      | Upland               |                                                      | 0.006                           | < 26        | 160             | 6.6         | < .001      | 11               | 0.36             | < .0002        | < 26         | < .05               | < 4.8             | 7.21            | 0.69             |
| 508           | 6/1/2011    | Pressure Tank                                                     | Valley               |                                                      | 2.69                            | < 26        | 120             | 0.069       | 0.0015      | 6.3              | 0.06             | < .0002        | < 26         | 0.91                |                   | 7.23            | 0.95             |
| 509           | 6/2/2011    | Pressure Tank In Old Creamery                                     | Upland               |                                                      | 5.5                             | < 26        | 76              | < .05       | < .001      | 3.8              | 0.0024           | < .0002        | < 26         | 1.3                 |                   | 6.42            | 0.81             |
| 510           | 10/26/2009  | Pressure Tank                                                     | Valley               | Yes                                                  |                                 |             |                 | < .05       |             | 6.01             | < .025           |                | 1.6          |                     |                   |                 |                  |
| 511           | 6/6/2011    | Dug Well 20 Feet From Se Corner Of House                          | Upland               |                                                      | 0.15                            | < 26        | 200             | 0.56        | < .001      | 6.7              | 2.6              | < .0002        | 213          | < .05               |                   | 7.06            | 2                |
| 512           | 10/26/2009  | Pressure Tank                                                     | Upland               | Yes                                                  |                                 |             |                 | < .05       |             | 6.79             | < .025           |                | 0.65         |                     |                   |                 |                  |

Table S.8. Groundwater Quality Data for 1701 "Pre-Drill" Water Well Samples from Susquehanna County, Pennsylvania

| Water Well ID | Sample Date | Sampling Port                                                         | Topographic Location | Gas Extraction Area (Within 1 km of Active Gas Well) | Dissolved Oxygen - Field (mg/L) | Ethane ug/L | Hardness (mg/L) | Iron (mg/L) | Lead (mg/L) | Magnesium (mg/L) | Manganese (mg/L) | Mercury (mg/L) | Methane ug/L | Nitrate as N (mg/L) | Oil Grease (mg/L) | pH - Field (SU) | Potassium (mg/L) |
|---------------|-------------|-----------------------------------------------------------------------|----------------------|------------------------------------------------------|---------------------------------|-------------|-----------------|-------------|-------------|------------------|------------------|----------------|--------------|---------------------|-------------------|-----------------|------------------|
| 513           | 6/13/2011   | Kitchen Sink                                                          | Valley               |                                                      | 7.74                            | < .025      |                 |             |             |                  |                  |                | 0.16         |                     |                   | 8.21            |                  |
| 514           | 6/13/2011   | Hand Dug Well                                                         | Upland               |                                                      | 6.31                            | < .025      |                 |             |             |                  |                  |                | 0.52         |                     |                   | 6.37            |                  |
| 515           | 6/13/2011   | Main Kitchen Sink                                                     | Upland               |                                                      | 6.67                            | < .025      |                 |             |             |                  |                  |                | 0.13         |                     |                   | 6.76            |                  |
| 516           | 6/13/2011   | Basement Pressure Tank                                                | Valley               |                                                      | 6.02                            | < .025      |                 |             |             |                  |                  |                | 2.2          |                     |                   | 7.18            |                  |
| 517           | 6/13/2011   | Exterior Faucet On South Side Of House Between Two Green Garage Doors | Upland               |                                                      | 11.55                           | < .025      |                 |             |             |                  |                  |                | 0.14         |                     |                   | 7.14            |                  |
| 518           | 6/14/2011   | Kitchen Sink                                                          | Valley               |                                                      | 3.82                            | < .025      |                 |             |             |                  |                  |                | 120          |                     |                   | 8.15            |                  |
| 519           | 6/14/2011   | Kitchen Sink                                                          | Upland               |                                                      | 3.96                            | < .025      |                 |             |             |                  |                  |                | < .1         |                     |                   | 7.12            |                  |
| 520           | 6/14/2011   | Pressure Tank                                                         | Upland               |                                                      | 6.02                            | < .025      |                 |             |             |                  |                  |                | 0.12         |                     |                   | 6.74            |                  |
| 521           | 6/14/2011   | Kitchen Sink                                                          | Valley               |                                                      | 9.23                            | < .025      |                 |             |             |                  |                  |                | 0.15         |                     |                   | 7.22            |                  |
| 522           | 10/26/2009  | Basement At Pressure Tank                                             | Upland               | Yes                                                  |                                 |             |                 | < .05       |             | 5.2              | < .025           |                | 0.71         |                     |                   |                 |                  |
| 523           | 6/14/2011   | Kitchen Faucet                                                        | Valley               |                                                      |                                 | 2.4         |                 |             |             |                  |                  |                | 11000        |                     |                   |                 |                  |
| 524           | 6/14/2011   | Kitchen Sink                                                          | Valley               |                                                      | 2.45                            | < .025      |                 |             |             |                  |                  |                | 6.3          |                     |                   | 7.24            |                  |
| 525           | 6/14/2011   | Kitchen Sink                                                          | Upland               |                                                      | 5.64                            | 0.093       |                 |             |             |                  |                  |                | 0.26         |                     |                   | 6.71            |                  |
| 526           | 6/14/2011   | Kitchen Sink                                                          | Valley               |                                                      | 5.63                            | < .025      |                 |             |             |                  |                  |                | 0.18         |                     |                   | 7.05            |                  |
| 527           | 6/14/2011   | Pressure Tank                                                         | Valley               |                                                      | 2.74                            | < .025      |                 |             |             |                  |                  |                | 1.2          |                     |                   | 7.11            |                  |
| 528           | 6/15/2011   |                                                                       | Upland               |                                                      |                                 | < .025      |                 |             |             |                  |                  |                | < .1         |                     |                   |                 |                  |
| 529           | 6/15/2011   | Kitchen Sink                                                          | Upland               |                                                      | 9.46                            | < .025      |                 |             |             |                  |                  |                | 0.95         |                     |                   | 6.57            |                  |
| 530           | 6/15/2011   | Spigot At Well House                                                  | Upland               |                                                      | 8.48                            | < .025      |                 |             |             |                  |                  |                | 1.4          |                     |                   | 7.09            |                  |
| 531           | 6/15/2011   | Kitchen Sink                                                          | Upland               |                                                      | 6.93                            | < .025      |                 |             |             |                  |                  |                | 0.18         |                     |                   | 6.43            |                  |
| 532           | 6/15/2011   | Kitchen Sink                                                          | Upland               |                                                      | 17.82                           | < .025      |                 |             |             |                  |                  |                | 0.2          |                     |                   | 5.73            |                  |
| 533           | 6/15/2011   | Kitchen Sink                                                          | Upland               |                                                      | 7.86                            | < .025      |                 |             |             |                  |                  |                | 0.13         |                     |                   | 6.72            |                  |

Table S.8. Groundwater Quality Data for 1701 "Pre-Drill" Water Well Samples from Susquehanna County, Pennsylvania

| Water Well ID | Sample Date | Sampling Port                                          | Topographic Location | Gas Extraction Area (Within 1 km of Active Gas Well) | Dissolved Oxygen - Field (mg/L) | Ethane ug/L | Hardness (mg/L) | Iron (mg/L) | Lead (mg/L) | Magnesium (mg/L) | Manganese (mg/L) | Mercury (mg/L) | Methane ug/L | Nitrate as N (mg/L) | Oil Grease (mg/L) | pH - Field (SU) | Potassium (mg/L) |
|---------------|-------------|--------------------------------------------------------|----------------------|------------------------------------------------------|---------------------------------|-------------|-----------------|-------------|-------------|------------------|------------------|----------------|--------------|---------------------|-------------------|-----------------|------------------|
| 534           | 6/16/2011   | Kitchen Sink                                           | Upland               |                                                      | 4.9                             | < .025      |                 |             |             |                  |                  |                | 0.12         |                     |                   | 7.19            |                  |
| 535           | 6/16/2011   | Pressure Tank                                          | Valley               |                                                      | 5.83                            | < .025      |                 |             |             |                  |                  |                | 0.13         |                     |                   | 6.69            |                  |
| 536           | 6/16/2011   | Kitchen Sink Overlooking Blanding Road                 | Upland               |                                                      | 9.98                            | < .025      |                 |             |             |                  |                  |                | 0.2          |                     |                   | 6.97            |                  |
| 537           | 6/16/2011   | Kitchen Sink On South Side Of House                    | Upland               |                                                      | 5.2                             | < .025      |                 |             |             |                  |                  |                | < .1         |                     |                   | 7.5             |                  |
| 538           | 6/16/2011   | Kitchen Sink                                           | Upland               |                                                      | 21.92                           | < .025      |                 |             |             |                  |                  |                | 0.2          |                     |                   | 7.45            |                  |
| 539           | 6/16/2011   | Kitchen Sink                                           | Upland               |                                                      | 25.54                           | < .025      |                 |             |             |                  |                  |                | 0.56         |                     |                   | 6.55            |                  |
| 540           | 6/16/2011   | Wellhead From Hose                                     | Upland               |                                                      | 2.45                            | 0.21        |                 |             |             |                  |                  |                | 160          |                     |                   | 8.83            |                  |
| 541           | 6/16/2011   | Kitchen Sink                                           | Valley               |                                                      | 9.25                            | < .025      |                 |             |             |                  |                  |                | 0.55         |                     |                   | 7               |                  |
| 542           | 6/17/2011   | Kitchen Sink                                           | Upland               |                                                      | 7.09                            | < .025      |                 |             |             |                  |                  |                | < .1         |                     |                   | 7.13            |                  |
| 543           | 6/17/2011   | Pressure Tank In Basement On Tingley Lake Side Of Road | Valley               |                                                      | 8.68                            | < .025      |                 |             |             |                  |                  |                | 1.7          |                     |                   | 6.54            |                  |
| 544           | 6/20/2011   | Pressure Tank                                          | Valley               |                                                      | 6.7                             | < .025      |                 |             |             |                  |                  |                | 1.4          |                     |                   | 7.41            |                  |
| 545           | 6/21/2011   | Kitchen Sink                                           | Valley               |                                                      | 16.71                           | < .025      |                 |             |             |                  |                  |                | 0.25         |                     |                   | 6.85            |                  |
| 546           | 6/21/2011   | Kitchen Sink                                           | Upland               |                                                      | 2.66                            | < .025      |                 |             |             |                  |                  |                | 0.14         |                     |                   | 6.9             |                  |
| 547           | 6/21/2011   | Kitchen Sink                                           | Upland               |                                                      | 21.07                           | < .025      |                 |             |             |                  |                  |                | 1.2          |                     |                   | 7.13            |                  |
| 548           | 4/26/2009   | Kitchen Sink                                           | Valley               |                                                      | 4.39                            | < .025      |                 | < .025      |             | 4.88             | < .025           |                | 2            |                     | < 5               | 7.4             |                  |
| 549           | 6/21/2011   | Kitchen Sink                                           | Upland               |                                                      | 3.16                            | < .025      |                 |             |             |                  |                  |                | 0.29         |                     |                   | 6.42            |                  |
| 550           | 6/21/2011   |                                                        | Valley               |                                                      |                                 | < .025      |                 |             |             |                  |                  |                | 0.47         |                     |                   |                 |                  |
| 551           | 6/22/2011   | Kitchen Sink                                           | Upland               |                                                      | 7.33                            | < .025      |                 |             |             |                  |                  |                | 0.13         |                     |                   | 6.67            |                  |
| 552           | 6/22/2011   | Basement Pressure Tank                                 | Valley               |                                                      | 7.48                            | < .025      |                 |             |             |                  |                  |                | 0.19         |                     |                   | 7.24            |                  |
| 553           | 6/22/2011   | Kitchen Sink                                           | Upland               |                                                      | 5.92                            | <0.025      |                 |             |             |                  |                  |                | 0.33         |                     |                   | 6.97            |                  |
| 554           | 6/22/2011   | Kitchen Sink                                           | Valley               |                                                      | 10.12                           | 0.037       |                 |             |             |                  |                  |                | 0.34         |                     |                   | 6.69            |                  |

Table S.8. Groundwater Quality Data for 1701 "Pre-Drill" Water Well Samples from Susquehanna County, Pennsylvania

| Water Well ID | Sample Date | Sampling Port              | Topographic Location | Gas Extraction Area (Within 1 km of Active Gas Well) | Dissolved Oxygen - Field (mg/L) | Ethane ug/L | Hardness (mg/L) | Iron (mg/L) | Lead (mg/L) | Magnesium (mg/L) | Manganese (mg/L) | Mercury (mg/L) | Methane ug/L | Nitrate as N (mg/L) | Oil Grease (mg/L) | pH - Field (SU) | Potassium (mg/L) |
|---------------|-------------|----------------------------|----------------------|------------------------------------------------------|---------------------------------|-------------|-----------------|-------------|-------------|------------------|------------------|----------------|--------------|---------------------|-------------------|-----------------|------------------|
| 555           | 6/22/2011   |                            | Upland               |                                                      |                                 | 1.1         |                 |             |             |                  |                  |                | 5300         |                     |                   |                 |                  |
| 556           | 6/22/2011   | Kitchen Sink               | Upland               |                                                      | 5.29                            | <0.025      |                 |             |             |                  |                  |                | 0.22         |                     |                   | 6.68            |                  |
| 557           | 6/23/2011   | Pressure Tank              | Valley               |                                                      | 3.19                            | 0.036       |                 |             |             |                  |                  |                | 95           |                     |                   | 6.74            |                  |
| 558           | 6/23/2011   | Pressure Tank              | Valley               |                                                      | 2.84                            | 0.059       |                 |             |             |                  |                  |                | 330          |                     |                   | 6.55            |                  |
| 559           | 6/23/2011   | Kitchen Sink               | Valley               |                                                      | 4.33                            | < .025      |                 |             |             |                  |                  |                | 0.17         |                     |                   | 6.92            |                  |
| 560           | 6/23/2011   | Kitchen Sink               | Valley               |                                                      | 15.27                           | < .025      |                 |             |             |                  |                  |                | 3.4          |                     |                   | 7.06            |                  |
| 561           | 6/23/2011   |                            | Valley               |                                                      |                                 | < .025      |                 |             |             |                  |                  |                | 0.44         |                     |                   |                 |                  |
| 562           | 6/23/2011   |                            | Upland               |                                                      |                                 | < .025      |                 |             |             |                  |                  |                | 0.14         |                     |                   |                 |                  |
| 563           | 10/27/2009  | Kitchen Sink - Ann'S House | Valley               | Yes                                                  | 6.61                            | < .025      |                 | < .05       |             | 7.43             | < .025           |                | 0.27         |                     |                   | 7.39            |                  |
| 564           | 6/24/2011   | Spigot                     | Upland               |                                                      | 7.39                            | < .025      |                 |             |             |                  |                  |                | 0.16         |                     |                   | 7.12            |                  |
| 565           | 6/24/2011   | Kitchen Sink               | Upland               |                                                      | 4.11                            | < .025      |                 |             |             |                  |                  |                | 0.16         |                     |                   | 7.47            |                  |
| 566           | 6/24/2011   | Kitchen Sink               | Upland               |                                                      | 3.41                            | < .025      |                 |             |             |                  |                  |                | 0.27         |                     |                   | 6.75            |                  |
| 567           | 6/24/2011   | Kitchen Sink               | Upland               |                                                      | 3.82                            | < .025      |                 |             |             |                  |                  |                | 0.19         |                     |                   | 7.37            |                  |
| 568           | 6/24/2011   | Kitchen Sink               | Valley               |                                                      | 1.51                            | 0.48        |                 |             |             |                  |                  |                | 1800         |                     |                   | 7.91            |                  |
| 569           | 6/24/2011   | Kitchen Sink               | Valley               |                                                      | 1.41                            | 0.36        |                 |             |             |                  |                  |                | 5800         |                     |                   | 7.77            |                  |
| 570           | 6/24/2011   | Kitchen Sink               | Upland               |                                                      | 4.65                            | < .025      |                 |             |             |                  |                  |                | 0.2          |                     |                   | 7.46            |                  |
| 571           | 6/24/2011   | Kitchen Sink               | Upland               |                                                      | 4.12                            | < .025      |                 |             |             |                  |                  |                | 0.34         |                     |                   | 7               |                  |
| 572           | 6/24/2011   |                            | Upland               |                                                      |                                 | < .025      |                 |             |             |                  |                  |                | 0.1          |                     |                   |                 |                  |
| 573           | 6/27/2011   | Kitchen Sink               | Valley               |                                                      | 3.02                            | 0.054       |                 |             |             |                  |                  |                | 160          |                     |                   | 7.22            |                  |
| 574           | 6/27/2011   |                            | Valley               |                                                      |                                 | < .025      |                 |             |             |                  |                  |                | 0.13         |                     |                   |                 |                  |
| 575           | 6/27/2011   | House Kitchen Sink         | Valley               |                                                      | 1.68                            | 0.36        |                 |             |             |                  |                  |                | 2800         |                     |                   | 7.14            |                  |
| 576           | 6/27/2011   |                            | Valley               |                                                      | 9.75                            | <0.025      |                 |             |             |                  |                  |                | 0.15         |                     |                   | 6.87            |                  |
| 577           | 6/27/2011   | Kitchen Sink               | Upland               |                                                      | 4.01                            | < .025      |                 |             |             |                  |                  |                | 0.4          |                     |                   | 6.88            |                  |
| 578           | 6/27/2011   | Kitchen Sink               | Upland               |                                                      | 6.78                            | < .025      |                 |             |             |                  |                  |                | 0.16         |                     |                   | 6.84            |                  |
| 579           | 6/27/2011   | Outside Spigot             | Valley               |                                                      | 1.33                            | 0.4         |                 |             |             |                  |                  |                | 3300         |                     |                   | 7.1             |                  |
| 580           | 6/28/2011   | Kitchen Sink               | Valley               |                                                      | 2.04                            | < .025      |                 |             |             |                  |                  |                | 670          |                     |                   | 6.69            |                  |
| 581           | 6/28/2011   |                            | Upland               |                                                      |                                 | < .025      |                 |             |             |                  |                  |                | 0.32         |                     |                   |                 |                  |
| 582           | 6/28/2011   | Outside Spigot             | Upland               |                                                      | 3.98                            | < .025      |                 |             |             |                  |                  |                | 0.17         |                     |                   | 6.62            |                  |
| 583           | 6/28/2011   |                            | Valley               |                                                      |                                 | < .025      |                 |             |             |                  |                  |                | 0.5          |                     |                   |                 |                  |

Table S.8. Groundwater Quality Data for 1701 "Pre-Drill" Water Well Samples from Susquehanna County, Pennsylvania

| Water Well ID | Sample Date | Sampling Port          | Topographic Location | Gas Extraction Area (Within 1 km of Active Gas Well) | Dissolved Oxygen - Field (mg/L) | Ethane ug/L | Hardness (mg/L) | Iron (mg/L) | Lead (mg/L) | Magnesium (mg/L) | Manganese (mg/L) | Mercury (mg/L) | Methane ug/L | Nitrate as N (mg/L) | Oil Grease (mg/L) | pH - Field (SU) | Potassium (mg/L) |
|---------------|-------------|------------------------|----------------------|------------------------------------------------------|---------------------------------|-------------|-----------------|-------------|-------------|------------------|------------------|----------------|--------------|---------------------|-------------------|-----------------|------------------|
| 584           | 6/28/2011   | Kitchen Sink           | Upland               |                                                      | 18.34                           | < .025      |                 |             |             |                  |                  |                | 0.18         |                     |                   | 7.82            |                  |
| 585           | 6/28/2011   |                        | Valley               |                                                      |                                 | < .025      |                 |             |             |                  |                  |                | 0.33         |                     |                   |                 |                  |
| 586           | 10/27/2009  | Pressure Tank          | Upland               |                                                      |                                 |             |                 | 0.134       |             | 4.64             | < .025           |                | 0.29         |                     |                   |                 |                  |
| 587           | 6/28/2011   | Kitchen Sink           | Valley               |                                                      | 4.71                            | < .025      |                 |             |             |                  |                  |                | 0.27         |                     |                   | 6.89            |                  |
| 588           | 6/28/2011   | Basement Pressure Tank | Upland               |                                                      | 5.1                             | < .025      |                 |             |             |                  |                  |                | 0.41         |                     |                   | 7.24            |                  |
| 589           | 6/29/2011   | Well Spigot            | Upland               |                                                      | 3.59                            | < .025      |                 |             |             |                  |                  |                | 13           |                     |                   | 6.5             |                  |
| 590           | 6/29/2011   |                        | Valley               |                                                      |                                 | < .025      |                 |             |             |                  |                  |                | 40           |                     |                   |                 |                  |
| 591           | 6/29/2011   |                        | Upland               |                                                      |                                 | <0.025      |                 |             |             |                  |                  |                | 0.76         |                     |                   |                 |                  |
| 592           | 6/29/2011   |                        | Valley               |                                                      |                                 | < .025      |                 |             |             |                  |                  |                | < .1         |                     |                   |                 |                  |
| 593           | 6/29/2011   |                        | Valley               |                                                      |                                 | < .025      |                 |             |             |                  |                  |                | 1.5          |                     |                   |                 |                  |
| 594           | 6/29/2011   |                        | Upland               |                                                      |                                 | < .025      |                 |             |             |                  |                  |                | 0.44         |                     |                   |                 |                  |
| 595           | 6/29/2011   | House Spigot           | Valley               |                                                      | 2.26                            | < .025      |                 |             |             |                  |                  |                | 13           |                     |                   | 6.85            |                  |
| 596           | 6/29/2011   | Kitchen Sink (Dennis)  | Upland               |                                                      | 5.03                            | 0.37        |                 |             |             |                  |                  |                | 1900         |                     |                   | 8.49            |                  |
| 597           | 6/30/2011   | Kitchen Sink           | Valley               |                                                      | 2.63                            | < .025      |                 |             |             |                  |                  |                | 0.31         |                     |                   | 7.43            |                  |
| 598           | 10/27/2009  | Pressure Tank          | Valley               |                                                      |                                 |             |                 | < .05       |             | 3.97             | < .025           |                | 0.12         |                     |                   |                 |                  |
| 599           | 6/30/2011   | Pressure Tank          | Valley               |                                                      | 7.8                             | < .025      |                 |             |             |                  |                  |                | 0.18         |                     |                   | 6.74            |                  |
| 600           | 6/30/2011   |                        | Valley               |                                                      |                                 | < .025      |                 |             |             |                  |                  |                | 0.5          |                     |                   |                 |                  |
| 601           | 6/30/2011   | Kitchen Sink           | Upland               |                                                      | 11.94                           | < .025      |                 |             |             |                  |                  |                | 0.16         |                     |                   | 6.91            |                  |
| 602           | 6/30/2011   | Pressure Tank          | Valley               |                                                      | 5.09                            | < .025      |                 |             |             |                  |                  |                | 0.18         |                     |                   | 7.21            |                  |
| 603           | 6/30/2011   |                        | Valley               |                                                      |                                 | < .025      |                 |             |             |                  |                  |                | 0.31         |                     |                   |                 |                  |
| 604           | 6/30/2011   |                        | Valley               |                                                      |                                 | < .025      |                 |             |             |                  |                  |                | 0.15         |                     |                   |                 |                  |
| 605           | 6/30/2011   |                        | Valley               |                                                      |                                 | < .025      |                 |             |             |                  |                  |                | 0.47         |                     |                   |                 |                  |
| 606           | 6/30/2011   | Sink In Bays Of Garage | Upland               |                                                      | 3.21                            | < .025      |                 |             |             |                  |                  |                | 0.3          |                     |                   | 7.16            |                  |
| 607           | 10/27/2009  | Pressure Tank          | Upland               |                                                      |                                 |             |                 | 0.272       |             | 5.22             | < .025           |                | 0.22         |                     |                   |                 |                  |
| 608           | 6/30/2011   | Basement Pressure Tank | Valley               |                                                      | 8.87                            | < .025      |                 |             |             |                  |                  |                | < .1         |                     |                   | 6.23            |                  |
| 609           | 6/30/2011   | Outside Spigot         | Upland               |                                                      | 8.66                            | < .025      |                 |             |             |                  |                  |                | 0.4          |                     |                   | 6.99            |                  |
| 610           | 6/30/2011   |                        | Upland               |                                                      | 6.18                            | <0.025      |                 |             |             |                  |                  |                | 0.17         |                     |                   | 7.04            |                  |
| 611           | 6/30/2011   | Kitchen Sink           | Upland               |                                                      |                                 | < .025      |                 |             |             |                  |                  |                | 2.4          |                     |                   |                 |                  |
| 612           | 6/30/2011   | Sink In Barn           | Valley               |                                                      | 3.04                            | < .025      |                 |             |             |                  |                  |                | 0.99         |                     |                   | 6.61            |                  |
| 613           | 7/1/2011    | Kitchen Sink           | Upland               |                                                      | 15.51                           | < .025      |                 |             |             |                  |                  |                | 0.18         |                     |                   | 7.32            |                  |

Table S.8. Groundwater Quality Data for 1701 "Pre-Drill" Water Well Samples from Susquehanna County, Pennsylvania

| Water Well ID | Sample Date | Sampling Port          | Topographic Location | Gas Extraction Area (Within 1 km of Active Gas Well) | Dissolved Oxygen - Field (mg/L) | Ethane ug/L | Hardness (mg/L) | Iron (mg/L) | Lead (mg/L) | Magnesium (mg/L) | Manganese (mg/L) | Mercury (mg/L) | Methane ug/L | Nitrate as N (mg/L) | Oil Grease (mg/L) | pH - Field (SU) | Potassium (mg/L) |
|---------------|-------------|------------------------|----------------------|------------------------------------------------------|---------------------------------|-------------|-----------------|-------------|-------------|------------------|------------------|----------------|--------------|---------------------|-------------------|-----------------|------------------|
| 614           | 7/1/2011    | Kitchen Sink           | Upland               |                                                      | 18.8                            | < .025      |                 |             |             |                  |                  |                | 520          |                     |                   | 6.29            |                  |
| 615           | 7/1/2011    | Kitchen Sink           | Upland               |                                                      |                                 | < .025      |                 |             |             |                  |                  |                | 0.14         |                     |                   |                 |                  |
| 616           | 7/1/2011    | Kitchen Sink           | Upland               |                                                      | 19.35                           | < .025      |                 |             |             |                  |                  |                | 0.11         |                     |                   | 7.56            |                  |
| 617           | 7/1/2011    | Kitchen Sink           | Valley               |                                                      | 2.05                            | 0.032       |                 |             |             |                  |                  |                | 420          |                     |                   | 7.32            |                  |
| 618           | 7/1/2011    | Outside Spigot         | Upland               |                                                      | 6.1                             | < .025      |                 |             |             |                  |                  |                | 0.18         |                     |                   | 7.3             |                  |
| 619           | 7/1/2011    |                        | Valley               |                                                      |                                 | < .025      |                 |             |             |                  |                  |                | 0.42         |                     |                   |                 |                  |
| 620           | 7/1/2011    | Outside Spigot         | Valley               |                                                      |                                 | 0.025       |                 |             |             |                  |                  |                | 0.54         |                     |                   |                 |                  |
| 621           | 7/1/2011    | Wellhead Spigot        | Valley               |                                                      |                                 | < .025      |                 |             |             |                  |                  |                | 3.2          |                     |                   |                 |                  |
| 622           | 7/5/2011    | Bathroom Sink          | Valley               |                                                      | 7.01                            | 0.16        |                 |             |             |                  |                  |                | 1200         |                     |                   | 7.6             |                  |
| 623           | 7/5/2011    | Kitchen Sink           | Upland               |                                                      | 6.93                            | < .025      |                 |             |             |                  |                  |                | 0.14         |                     |                   | 6.97            |                  |
| 624           | 7/5/2011    | Basement Pressure Tank | Upland               |                                                      | 4.89                            | < .025      |                 |             |             |                  |                  |                | 0.39         |                     |                   | 6.92            |                  |
| 625           | 7/5/2011    |                        | Valley               |                                                      |                                 | 0.27        |                 |             |             |                  |                  |                | 2300         |                     |                   |                 |                  |
| 626           | 7/5/2011    | Kitchen Sink           | Valley               |                                                      | 5.24                            | < .025      |                 |             |             |                  |                  |                | 0.13         |                     |                   | 7.3             |                  |
| 627           | 10/27/2009  | Pressure Tank          | Valley               |                                                      |                                 |             |                 | < .05       |             | 1.38             | < .025           |                | 260          |                     |                   |                 |                  |
| 628           | 7/5/2011    | Kitchen Sink           | Upland               |                                                      | 6.65                            | < .025      |                 |             |             |                  |                  |                | 0.25         |                     |                   | 7.32            |                  |
| 629           | 7/5/2011    | Outside Spigot         | Valley               |                                                      |                                 | < .025      |                 |             |             |                  |                  |                | 0.18         |                     |                   |                 |                  |
| 630           | 7/5/2011    | Kitchen Sink           | Upland               |                                                      |                                 | < .025      |                 |             |             |                  |                  |                | 0.34         |                     |                   |                 |                  |
| 631           | 7/5/2011    | Kitchen Sink           | Valley               |                                                      |                                 | < .025      |                 |             |             |                  |                  |                | 0.23         |                     |                   |                 |                  |
| 632           | 7/5/2011    | Outside Spigot         | Valley               |                                                      |                                 | < .025      |                 |             |             |                  |                  |                | 0.18         |                     |                   |                 |                  |
| 633           | 7/5/2011    | Kitchen Sink           | Valley               |                                                      |                                 | < .025      |                 |             |             |                  |                  |                | 0.14         |                     |                   |                 |                  |
| 634           | 7/5/2011    | Kitchen Sink           | Valley               |                                                      | 8.7                             | < .025      |                 |             |             |                  |                  |                | 1.5          |                     |                   | 6.78            |                  |
| 635           | 7/5/2011    | Kitchen Sink Main Camp | Valley               |                                                      | 34.8                            | < .025      |                 |             |             |                  |                  |                | 0.12         |                     |                   | 6.22            |                  |
| 636           | 7/5/2011    | Pressure Tank          | Valley               |                                                      | 5.61                            | < .025      |                 |             |             |                  |                  |                | 0.36         |                     |                   | 7.56            |                  |
| 637           | 7/5/2011    | Kitchen Sink           | Upland               |                                                      |                                 | < .025      |                 |             |             |                  |                  |                | 0.32         |                     |                   |                 |                  |
| 638           | 7/5/2011    | Kitchen Faucet         | Valley               |                                                      | 3.97                            | < .025      |                 |             |             |                  |                  |                | 54           |                     |                   | 7.55            |                  |

Table S.8. Groundwater Quality Data for 1701 "Pre-Drill" Water Well Samples from Susquehanna County, Pennsylvania

| Water Well ID | Sample Date | Sampling Port             | Topographic Location | Gas Extraction Area (Within 1 km of Active Gas Well) | Dissolved Oxygen - Field (mg/L) | Ethane ug/L | Hardness (mg/L) | Iron (mg/L) | Lead (mg/L) | Magnesium (mg/L) | Manganese (mg/L) | Mercury (mg/L) | Methane ug/L | Nitrate as N (mg/L) | Oil Grease (mg/L) | pH - Field (SU) | Potassium (mg/L) |
|---------------|-------------|---------------------------|----------------------|------------------------------------------------------|---------------------------------|-------------|-----------------|-------------|-------------|------------------|------------------|----------------|--------------|---------------------|-------------------|-----------------|------------------|
| 639           | 7/5/2011    | Kitchen Sink              | Valley               |                                                      | 2.96                            | < .025      |                 |             |             |                  |                  |                | 6.6          |                     |                   | 7.88            |                  |
| 640           | 7/5/2011    | Kitchen Sink              | Upland               |                                                      | 3.84                            | < .025      |                 |             |             |                  |                  |                | 0.24         |                     |                   | 7.56            |                  |
| 641           | 7/5/2011    | Kitchen Sink              | Upland               |                                                      | 2.43                            | 0.058       |                 |             |             |                  |                  |                | 760          |                     |                   | 8.37            |                  |
| 642           | 7/6/2011    | Kitchen Sink              | Upland               |                                                      | 1.67                            | 0.82        |                 |             |             |                  |                  |                | 2600         |                     |                   | 8.86            |                  |
| 643           | 7/6/2011    | Kitchen Sink              | Valley               |                                                      | 2.88                            | < .025      |                 |             |             |                  |                  |                | 0.16         |                     |                   | 7.75            |                  |
| 644           | 7/6/2011    | Kitchen Sink              | Upland               |                                                      | 7.47                            | < .025      |                 |             |             |                  |                  |                | 0.24         |                     |                   | 7.29            |                  |
| 645           | 7/6/2011    |                           | Upland               |                                                      |                                 | < .025      |                 |             |             |                  |                  |                | 0.1          |                     |                   |                 |                  |
| 646           | 7/6/2011    | Farm Sink                 | Valley               |                                                      |                                 | < .025      |                 |             |             |                  |                  |                | 7.2          |                     |                   |                 |                  |
| 647           | 7/6/2011    |                           | Upland               |                                                      |                                 | < .025      |                 |             |             |                  |                  |                | 0.13         |                     |                   |                 |                  |
| 648           | 7/6/2011    | Kitchen Sink              | Valley               |                                                      | 3.03                            | 0.15        |                 |             |             |                  |                  |                | 600          |                     |                   | 7.28            |                  |
| 649           | 7/6/2011    |                           | Valley               |                                                      |                                 | < .025      |                 |             |             |                  |                  |                | 0.12         |                     |                   |                 |                  |
| 650           | 7/6/2011    | Kitchen Sink              | Valley               |                                                      | 5.22                            | < .025      |                 |             |             |                  |                  |                | 0.57         |                     |                   | 6.98            |                  |
| 651           | 7/6/2011    | Kitchen Sink              | Valley               |                                                      | 10.16                           | < .025      |                 |             |             |                  |                  |                | < .1         |                     |                   | 7.72            |                  |
| 652           | 7/6/2011    | Basement Pressure Tank    | Valley               |                                                      | 2.84                            | < .025      |                 |             |             |                  |                  |                | 0.28         |                     |                   | 7.38            |                  |
| 653           | 7/6/2011    | House Well                | Upland               |                                                      | 10.48                           | < .025      |                 |             |             |                  |                  |                | 0.23         |                     |                   | 6.39            |                  |
| 654           | 7/6/2011    | Outside Spigot            | Valley               |                                                      | 4.24                            | < .025      |                 |             |             |                  |                  |                | 1.2          |                     |                   | 7.22            |                  |
| 655           | 7/7/2011    | Pressure Tank In Basement | Upland               |                                                      | 5.56                            | < .025      |                 |             |             |                  |                  |                | 0.14         |                     |                   | 7.28            |                  |
| 656           | 7/7/2011    | Kitchen Sink              | Upland               |                                                      | 3.39                            | < .025      |                 |             |             |                  |                  |                | 0.27         |                     |                   | 7.53            |                  |
| 657           | 7/7/2011    | Outside Faucet            | Upland               |                                                      | 2.46                            | < .025      |                 |             |             |                  |                  |                | 0.15         |                     |                   | 7.24            |                  |
| 658           | 7/7/2011    | Kitchen Sink              | Valley               |                                                      | 13.65                           | < .025      |                 |             |             |                  |                  |                | < .1         |                     |                   | 6.39            |                  |
| 659           | 7/7/2011    | Kitchen Sink              | Upland               |                                                      | 7.21                            | 0.36        |                 |             |             |                  |                  |                | 2300         |                     |                   | 5.51            |                  |
| 660           | 7/7/2011    | Kitchen Sink              | Upland               |                                                      |                                 | < .025      |                 |             |             |                  |                  |                | 0.24         |                     |                   |                 |                  |
| 661           | 7/7/2011    | Outside Faucet            | Valley               |                                                      |                                 | < .025      |                 |             |             |                  |                  |                | 22           |                     |                   |                 |                  |
| 662           | 7/7/2011    | Garage Spigot             | Valley               |                                                      |                                 | < .025      |                 |             |             |                  |                  |                | < .1         |                     |                   |                 |                  |
| 663           | 7/7/2011    | Kitchen Sink              | Valley               |                                                      | 10.42                           | <0.025      |                 |             |             |                  |                  |                | <0.1         |                     |                   | 6.68            |                  |
| 664           | 7/7/2011    | Pressure Tank             | Upland               |                                                      | 14.9                            | < .025      |                 |             |             |                  |                  |                | 1.2          |                     |                   | 6.39            |                  |
| 665           | 7/7/2011    | Kitchen Sink              | Upland               |                                                      | 5.87                            | < .025      |                 |             |             |                  |                  |                | 0.63         |                     |                   | 6.17            |                  |



Table S.8. Groundwater Quality Data for 1701 "Pre-Drill" Water Well Samples from Susquehanna County, Pennsylvania

| Water Well ID | Sample Date | Sampling Port              | Topographic Location | Gas Extraction Area (Within 1 km of Active Gas Well) | Dissolved Oxygen - Field (mg/L) | Ethane ug/L | Hardness (mg/L) | Iron (mg/L) | Lead (mg/L) | Magnesium (mg/L) | Manganese (mg/L) | Mercury (mg/L) | Methane ug/L | Nitrate as N (mg/L) | Oil Grease (mg/L) | pH - Field (SU) | Potassium (mg/L) |
|---------------|-------------|----------------------------|----------------------|------------------------------------------------------|---------------------------------|-------------|-----------------|-------------|-------------|------------------|------------------|----------------|--------------|---------------------|-------------------|-----------------|------------------|
| 666           | 7/7/2011    | Kitchen Sink               | Valley               |                                                      |                                 | < .025      |                 |             |             |                  |                  |                | < .1         |                     |                   |                 |                  |
| 667           | 7/7/2011    | Kitchen Sink               | Upland               |                                                      | 12.07                           | < .025      |                 |             |             |                  |                  |                | 0.66         |                     |                   | 5.75            |                  |
| 668           | 7/7/2011    | Kitchen Sink               | Upland               |                                                      | 3.13                            | < .025      |                 |             |             |                  |                  |                | 0.51         |                     |                   | 7.47            |                  |
| 669           | 7/7/2011    | Bunk House Sink            | Upland               |                                                      | 2.17                            | 0.029       |                 |             |             |                  |                  |                | 5.3          |                     |                   | 7.26            |                  |
| 670           | 7/7/2011    | Spigot At Well Head        | Valley               |                                                      | 9.82                            | < .025      |                 |             |             |                  |                  |                | < .1         |                     |                   | 6.76            |                  |
| 671           | 7/8/2011    | Kitchen Sink               | Valley               |                                                      | 2.73                            | < .025      |                 |             |             |                  |                  |                | 3            |                     |                   | 7.03            |                  |
| 672           | 7/8/2011    | Kitchen Faucet             | Upland               |                                                      | 18.23                           | < .025      |                 |             |             |                  |                  |                | 0.75         |                     |                   | 6.4             |                  |
| 673           | 7/8/2011    | Pressure Tank              | Valley               |                                                      |                                 | < .025      |                 |             |             |                  |                  |                | < .1         |                     |                   |                 |                  |
| 674           | 7/8/2011    | Kitchen Faucet             | Upland               |                                                      |                                 | < .025      |                 |             |             |                  |                  |                | < .1         |                     |                   |                 |                  |
| 675           | 7/8/2011    | Kitchen Faucet             | Upland               |                                                      | 22.94                           | < .025      |                 |             |             |                  |                  |                | 0.27         |                     |                   | 6.23            |                  |
| 676           | 7/8/2011    | Kitchen Sink               | Upland               |                                                      | 7.22                            | < .025      |                 |             |             |                  |                  |                | < .1         |                     |                   | 7.05            |                  |
| 677           | 7/8/2011    | Kitchen Sink               | Upland               |                                                      | 4.78                            | < .025      |                 |             |             |                  |                  |                | 0.11         |                     |                   | 7.28            |                  |
| 678           | 7/8/2011    | Kitchen Sink               | Valley               |                                                      | 5.15                            | < .025      |                 |             |             |                  |                  |                | 0.38         |                     |                   | 6.87            |                  |
| 679           | 7/8/2011    | Spigot In Cooling Barn     | Upland               |                                                      | 9.74                            | < .025      |                 |             |             |                  |                  |                | 0.89         |                     |                   | 6.09            |                  |
| 680           | 7/8/2011    | Kitchen Sink               | Upland               |                                                      | 8.83                            | < .025      |                 |             |             |                  |                  |                | 0.98         |                     |                   | 6.61            |                  |
| 681           | 7/8/2011    | Shop Sink                  | Upland               |                                                      | 13.49                           | < .025      |                 |             |             |                  |                  |                | 0.1          |                     |                   | 6.05            |                  |
| 682           | 7/8/2011    | Kitchen Sink               | Upland               |                                                      | 33.31                           | < .025      |                 |             |             |                  |                  |                | 0.5          |                     |                   | 6.68            |                  |
| 683           | 7/9/2011    | Kitchen Sink               | Upland               |                                                      |                                 | < .025      |                 |             |             |                  |                  |                | 0.18         |                     |                   |                 |                  |
| 684           | 7/11/2011   | Spigot On Front Of House   | Valley               |                                                      | 1.87                            | 0.05        |                 |             |             |                  |                  |                | 1.6          |                     |                   | 7.44            |                  |
| 685           | 7/11/2011   | Spigot Near Water Fountain | Valley               |                                                      | 7.74                            | 0.088       |                 |             |             |                  |                  |                | 150          |                     |                   | 6.83            |                  |
| 686           | 7/11/2011   | Outside Spigot             | Upland               |                                                      |                                 | 0.3         |                 |             |             |                  |                  |                | 1700         |                     |                   |                 |                  |
| 687           | 7/11/2011   | Kitchen Sink               | Valley               |                                                      |                                 | < .025      |                 |             |             |                  |                  |                | 2.3          |                     |                   |                 |                  |
| 688           | 7/11/2011   | Kitchen Sink               | Valley               |                                                      |                                 | < .025      |                 |             |             |                  |                  |                | 29           |                     |                   |                 |                  |
| 689           | 7/11/2011   | Kitchen Sink               | Valley               |                                                      | 3.87                            | < .025      |                 |             |             |                  |                  |                | 2.5          |                     |                   | 7.36            |                  |

Table S.8. Groundwater Quality Data for 1701 "Pre-Drill" Water Well Samples from Susquehanna County, Pennsylvania

| Water Well ID | Sample Date | Sampling Port            | Topographic Location | Gas Extraction Area (Within 1 km of Active Gas Well) | Dissolved Oxygen - Field (mg/L) | Ethane ug/L | Hardness (mg/L) | Iron (mg/L) | Lead (mg/L) | Magnesium (mg/L) | Manganese (mg/L) | Mercury (mg/L) | Methane ug/L | Nitrate as N (mg/L) | Oil Grease (mg/L) | pH - Field (SU) | Potassium (mg/L) |
|---------------|-------------|--------------------------|----------------------|------------------------------------------------------|---------------------------------|-------------|-----------------|-------------|-------------|------------------|------------------|----------------|--------------|---------------------|-------------------|-----------------|------------------|
| 690           | 11/5/2009   | Pressure Tank            | Upland               | Yes                                                  | 4.14                            | < .025      |                 | < .05       |             | 7.14             | < .025           |                | 0.51         |                     |                   | 8.1             |                  |
| 691           | 7/11/2011   | Kitchen Sink             | Upland               |                                                      | 5.9                             | < .025      |                 |             |             |                  |                  |                | 0.42         |                     |                   | 7.3             |                  |
| 692           | 7/11/2011   | Kitchen Sink             | Upland               |                                                      | 4.85                            | < .025      |                 |             |             |                  |                  |                | 0.61         |                     |                   | 6.62            |                  |
| 693           | 7/11/2011   | Kitchen Sink             | Upland               |                                                      | 16.61                           | < .025      |                 |             |             |                  |                  |                | 0.39         |                     |                   | 5.87            |                  |
| 694           | 7/11/2011   | Hand Dug Well            | Upland               |                                                      | 9.68                            | < .025      |                 |             |             |                  |                  |                | 0.17         |                     |                   | 6.8             |                  |
| 695           | 7/11/2011   | Kitchen Sink             | Valley               |                                                      | 2.3                             | 4.2         |                 |             |             |                  |                  |                | 11000        |                     |                   | 7.84            |                  |
| 696           | 7/12/2011   | Bathroom Sink Downstairs | Valley               |                                                      |                                 | < .025      |                 |             |             |                  |                  |                | 0.46         |                     |                   |                 |                  |
| 697           | 7/12/2011   | Kitchen Sink             | Upland               |                                                      |                                 | 0.033       |                 |             |             |                  |                  |                | 260          |                     |                   |                 |                  |
| 698           | 7/12/2011   | Kitchen Faucet           | Valley               |                                                      | 4.55                            | 0.031       |                 |             |             |                  |                  |                | 210          |                     |                   | 7.59            |                  |
| 699           | 7/12/2011   | Kitchen Sink             | Valley               |                                                      | 15.91                           | < .025      |                 |             |             |                  |                  |                | 0.22         |                     |                   | 5.95            |                  |
| 700           | 7/12/2011   | Kitchen Sink             | Valley               |                                                      | 6.71                            | 0.92        |                 |             |             |                  |                  |                | 3300         |                     |                   | 8.48            |                  |
| 701           | 7/12/2011   | Pressure Tank            | Upland               |                                                      | 3.26                            | < .025      |                 |             |             |                  |                  |                | 0.13         |                     |                   | 7.78            |                  |
| 702           | 7/12/2011   | Kitchen Sink             | Upland               |                                                      |                                 | < .025      |                 |             |             |                  |                  |                | < .1         |                     |                   |                 |                  |
| 703           | 7/12/2011   | Spigot Before Filter     | Valley               |                                                      |                                 | < .025      |                 |             |             |                  |                  |                | 4.2          |                     |                   |                 |                  |
| 704           | 7/12/2011   | Kitchen Sink             | Valley               |                                                      |                                 | < .025      |                 |             |             |                  |                  |                | 0.34         |                     |                   |                 |                  |
| 705           | 7/12/2011   |                          | Valley               |                                                      |                                 | < .025      |                 |             |             |                  |                  |                | 2.2          |                     |                   |                 |                  |
| 706           | 7/12/2011   | Pressure Tank            | Upland               |                                                      | 5.25                            | < .025      |                 |             |             |                  |                  |                | 0.45         |                     |                   | 7.72            |                  |
| 707           | 7/12/2011   | Inside Faucet            | Upland               |                                                      | 2.1                             | < .025      |                 |             |             |                  |                  |                | 0.37         |                     |                   | 7.74            |                  |
| 708           | 7/12/2011   | Kitchen Sink             | Upland               |                                                      | 3.45                            | < .025      |                 |             |             |                  |                  |                | 0.71         |                     |                   | 7.93            |                  |
| 709           | 7/12/2011   | Spigot                   | Upland               |                                                      | 6.01                            | < .025      |                 |             |             |                  |                  |                | 4.9          |                     |                   | 8.12            |                  |
| 710           | 7/12/2011   | Spigot                   | Upland               |                                                      | 3.26                            | < .025      |                 |             |             |                  |                  |                | 0.21         |                     |                   | 7.93            |                  |
| 711           | 7/12/2011   | Kitchen Sink             | Valley               |                                                      | 2.54                            | 0.055       |                 |             |             |                  |                  |                | 140          |                     |                   | 7.96            |                  |
| 712           | 7/12/2011   | Kitchen Faucet           | Upland               |                                                      | 8.77                            | < .025      |                 |             |             |                  |                  |                | 7.6          |                     |                   | 6.91            |                  |
| 713           | 7/12/2011   | Kitchen Faucet           | Valley               |                                                      | 10.42                           | < .025      |                 |             |             |                  |                  |                | 0.11         |                     |                   | 6.72            |                  |
| 714           | 7/13/2011   | Kitchen Sink             | Valley               |                                                      | 9.77                            | < .017      |                 |             |             |                  |                  |                | 73           |                     |                   | 8.26            |                  |
| 715           | 7/13/2011   | Kitchen Sink             | Valley               |                                                      | 10.08                           | < .025      |                 |             |             |                  |                  |                | 0.26         |                     |                   | 7.76            |                  |

Table S.8. Groundwater Quality Data for 1701 "Pre-Drill" Water Well Samples from Susquehanna County, Pennsylvania

| Water Well ID | Sample Date | Sampling Port                  | Topographic Location | Gas Extraction Area (Within 1 km of Active Gas Well) | Dissolved Oxygen - Field (mg/L) | Ethane ug/L | Hardness (mg/L) | Iron (mg/L) | Lead (mg/L) | Magnesium (mg/L) | Manganese (mg/L) | Mercury (mg/L) | Methane ug/L | Nitrate as N (mg/L) | Oil Grease (mg/L) | pH - Field (SU) | Potassium (mg/L) |
|---------------|-------------|--------------------------------|----------------------|------------------------------------------------------|---------------------------------|-------------|-----------------|-------------|-------------|------------------|------------------|----------------|--------------|---------------------|-------------------|-----------------|------------------|
| 716           | 7/13/2011   | Kitchen Sink                   | Upland               |                                                      | 9.01                            | < .025      |                 |             |             |                  |                  |                | 0.11         |                     |                   | 6.62            |                  |
| 717           | 7/13/2011   | Spigot                         | Valley               |                                                      | 10.54                           | < .025      |                 |             |             |                  |                  |                | 0.2          |                     |                   | 6.59            |                  |
| 718           | 7/13/2011   | Spigot On Well                 | Valley               |                                                      | 3.85                            | < .025      |                 |             |             |                  |                  |                | 0.51         |                     |                   | 6.12            |                  |
| 719           | 7/13/2011   | Barn Spigot                    | Valley               |                                                      | 4.3                             | < .025      |                 |             |             |                  |                  |                | < .1         |                     |                   | 7.1             |                  |
| 720           | 7/13/2011   | Kitchen Sink                   | Valley               |                                                      | 9.78                            | < .025      |                 |             |             |                  |                  |                | 0.46         |                     |                   | 7.63            |                  |
| 721           | 7/13/2011   | Garage Spigot                  | Upland               |                                                      | 10.75                           | < .025      |                 |             |             |                  |                  |                | 0.26         |                     |                   | 8.09            |                  |
| 722           | 7/13/2011   | Kitchen Sink                   | Valley               |                                                      | 11.28                           | 0.026       |                 |             |             |                  |                  |                | 0.65         |                     |                   | 7.92            |                  |
| 723           | 7/13/2011   | Kitchen Sink                   | Valley               |                                                      | 10.78                           | 0.52        |                 |             |             |                  |                  |                | 2200         |                     |                   | 7.85            |                  |
| 724           | 7/8/2011    |                                | Upland               |                                                      |                                 | < .025      |                 |             |             |                  |                  |                | 1.3          |                     |                   |                 |                  |
| 725           | 7/8/2011    | Kitchen Sink                   | Upland               |                                                      |                                 | < .025      |                 |             |             |                  |                  |                | 0.12         |                     |                   |                 |                  |
| 726           | 4/13/2011   | Milkhouse Faucet Barn Well     | Valley               |                                                      | 6.73                            | 0.27        | 12.33526        | < .05       | < .0003     | 0.57             | 0.011            | < .0002        | 2400         | < 1                 | < 5               | 8.67            | 2.6              |
| 727           | 4/13/2011   | Tenant'S Pressure Tank         | Upland               |                                                      | 11.84                           | < .025      | 39.8472         | < .05       | 0.0019      | 2.4              | < .0025          | < .0002        | 0.072        | < 1                 | < 5               | 5.92            | 3.3              |
| 728           | 4/13/2011   | Outside Spigot On Garage       | Upland               |                                                      |                                 | < .025      | 83.891          | 1.2         | 0.0014      | 4                | 0.12             | < .0002        | 5.8          | < 1                 | < 5               |                 | 2.2              |
| 729           | 4/26/2011   | Pressure Tank                  | Valley               |                                                      | 10.8                            | < .025      | 174.835         | 1.4         | 0.023       | 8.5              | 3                | < .0002        | 0.23         | < 1                 | < 5               | 7.03            | 1.7              |
| 730           | 6/17/2011   | Spigot On Front Of House       | Upland               |                                                      | 3.5                             | < .025      |                 |             |             |                  |                  |                | 0.13         |                     |                   | 7.18            |                  |
| 731           | 6/17/2011   | Kitchen Sink                   | Valley               |                                                      | 7.68                            | < .025      |                 |             |             |                  |                  |                | < .1         |                     |                   | 7.21            |                  |
| 732           | 6/17/2011   | Spigot Inside Of Shed On Right | Upland               |                                                      | 5.15                            | < .025      |                 |             |             |                  |                  |                | 14           |                     |                   | 6.92            |                  |
| 733           | 6/17/2011   | Kitchen Sink                   | Valley               |                                                      | 3.02                            | < .025      |                 |             |             |                  |                  |                | 5.7          |                     |                   | 7.02            |                  |
| 734           | 6/17/2011   | Pressure Tank                  | Valley               |                                                      | 4.79                            | < .025      |                 |             |             |                  |                  |                | 9            |                     |                   | 6.27            |                  |
| 735           | 6/20/2011   | Kitchen Sink                   | Upland               |                                                      | 1.38                            | < .025      |                 |             |             |                  |                  |                | 15           |                     |                   | 7.72            |                  |
| 736           | 6/20/2011   | Pressure Tank                  | Valley               |                                                      | 1.96                            | < .025      |                 |             |             |                  |                  |                | 0.34         |                     |                   | 7.22            |                  |
| 737           | 6/20/2011   | Kitchen Sink                   | Upland               |                                                      | 3.18                            | < .025      |                 |             |             |                  |                  |                | 0.2          |                     |                   | 7.2             |                  |
| 738           | 6/20/2011   | Kitchen Sink                   | Valley               |                                                      | 1.45                            | < .025      |                 |             |             |                  |                  |                | 94           |                     |                   | 6.83            |                  |
| 739           | 6/20/2011   | Kitchen Sink                   | Valley               |                                                      | 1.54                            | < .025      |                 |             |             |                  |                  |                | 48           |                     |                   | 7.39            |                  |

Table S.8. Groundwater Quality Data for 1701 "Pre-Drill" Water Well Samples from Susquehanna County, Pennsylvania

| Water Well ID | Sample Date | Sampling Port                 | Topographic Location | Gas Extraction Area (Within 1 km of Active Gas Well) | Dissolved Oxygen - Field (mg/L) | Ethane ug/L | Hardness (mg/L) | Iron (mg/L) | Lead (mg/L) | Magnesium (mg/L) | Manganese (mg/L) | Mercury (mg/L) | Methane ug/L | Nitrate as N (mg/L) | Oil Grease (mg/L) | pH - Field (SU) | Potassium (mg/L) |
|---------------|-------------|-------------------------------|----------------------|------------------------------------------------------|---------------------------------|-------------|-----------------|-------------|-------------|------------------|------------------|----------------|--------------|---------------------|-------------------|-----------------|------------------|
| 740           | 6/20/2011   | Kitchen Sink                  | Valley               |                                                      | 1.3                             | 0.13        |                 |             |             |                  |                  |                | 700          |                     |                   | 7.68            |                  |
| 741           | 6/21/2011   | Kitchen Sink                  | Upland               |                                                      | 26.55                           | < .025      |                 |             |             |                  |                  |                | 0.1          |                     |                   | 6.63            |                  |
| 742           | 6/21/2011   | Kitchen Sink                  | Valley               |                                                      | 14.39                           | < .025      |                 |             |             |                  |                  |                | 1.4          |                     |                   | 7.22            |                  |
| 743           | 6/21/2011   | Kitchen Sink                  | Valley               |                                                      | 1.64                            | < .025      |                 |             |             |                  |                  |                | 23           |                     |                   | 7.64            |                  |
| 744           | 6/21/2011   | Kitchen Sink                  | Valley               |                                                      | 1.39                            | < .025      |                 |             |             |                  |                  |                | 0.13         |                     |                   | 7.35            |                  |
| 745           | 6/21/2011   |                               | Valley               |                                                      |                                 | < .025      |                 |             |             |                  |                  |                | < .1         |                     |                   |                 |                  |
| 746           | 6/21/2011   | Outside Spigot                | Valley               |                                                      | 12.98                           | 0.11        |                 |             |             |                  |                  |                | 1300         |                     |                   | 7.17            |                  |
| 747           | 6/21/2011   | Kitchen Sink                  | Valley               |                                                      | 1.95                            | < .025      |                 |             |             |                  |                  |                | 210          |                     |                   | 7.35            |                  |
| 748           | 6/21/2011   | Wellhead Spigot               | Valley               |                                                      | 12.36                           | < .025      |                 |             |             |                  |                  |                | 0.92         |                     |                   | 7.3             |                  |
| 749           | 6/21/2011   | Kitchen Sink                  | Upland               |                                                      | 2.42                            | < .025      |                 |             |             |                  |                  |                | 16           |                     |                   | 7.38            |                  |
| 750           | 6/21/2011   |                               | Upland               |                                                      |                                 | 0.15        |                 |             |             |                  |                  |                | 500          |                     |                   |                 |                  |
| 751           | 6/29/2011   | Kitchen Sink                  | Upland               |                                                      | 5.85                            | < .025      |                 |             |             |                  |                  |                | 0.15         |                     |                   | 6.45            |                  |
| 752           | 6/29/2011   | Barn Spigot                   | Valley               |                                                      | 69.01                           | < .025      |                 |             |             |                  |                  |                | 0.13         |                     |                   | 6.61            |                  |
| 753           | 7/8/2011    | Well 2 On South Side Of House | Upland               |                                                      | 12.86                           | < .025      |                 |             |             |                  |                  |                | 1.1          |                     |                   |                 |                  |
| 754           | 7/8/2011    | Kitchen Sink                  | Upland               |                                                      | 15.54                           | < .025      |                 |             |             |                  |                  |                | 0.13         |                     |                   |                 |                  |
| 755           | 7/8/2011    | Kitchen Sink                  | Valley               |                                                      |                                 | < .025      |                 |             |             |                  |                  |                | 0.11         |                     |                   |                 |                  |
| 756           | 7/9/2011    | Kitchen Sink                  | Valley               |                                                      |                                 | < .025      |                 |             |             |                  |                  |                | 2            |                     |                   |                 |                  |
| 757           | 7/9/2011    | Spring                        | Upland               |                                                      |                                 | < .025      |                 |             |             |                  |                  |                | 0.73         |                     |                   |                 |                  |
| 758           | 7/11/2011   | Kitchen Sink                  | Valley               |                                                      |                                 | < .025      |                 |             |             |                  |                  |                | 0.22         |                     |                   |                 |                  |
| 759           | 7/11/2011   | Kitchen Sink                  | Valley               |                                                      | 8.76                            | < .025      |                 |             |             |                  |                  |                | 0.18         |                     |                   | 7.09            |                  |
| 760           | 7/11/2011   | Kitchen Sink                  | Valley               |                                                      | 17.76                           | < .025      |                 |             |             |                  |                  |                | < .1         |                     |                   | 7.5             |                  |
| 761           | 11/5/2009   | Outside Faucet                | Valley               | Yes                                                  | 6.33                            | < .025      |                 | 0.927       |             | 5.98             | 0.025            |                | 94           |                     |                   | 8.26            |                  |
| 762           | 7/12/2011   | Kitchen Sink                  | Valley               |                                                      | 10.17                           | < .025      |                 |             |             |                  |                  |                | 0.14         |                     |                   | 5.53            |                  |
| 763           | 7/12/2011   | Kitchen Sink                  | Valley               |                                                      | 9.34                            | < .025      |                 |             |             |                  |                  |                | 0.16         |                     |                   | 4.45            |                  |
| 764           | 7/14/2011   | Kitchen Sink                  | Upland               |                                                      | 14.48                           | < .025      |                 |             |             |                  |                  |                | 0.66         |                     |                   | 7.81            |                  |
| 765           | 7/14/2011   | Kitchen Sink                  | Upland               |                                                      | 10.6                            | < .025      |                 |             |             |                  |                  |                | 0.37         |                     |                   | 7.23            |                  |
| 766           | 7/14/2011   | Kitchen Sink                  | Valley               |                                                      | 11.04                           | 2.1         |                 |             |             |                  |                  |                | 12000        |                     |                   | 7.91            |                  |

Table S.8. Groundwater Quality Data for 1701 "Pre-Drill" Water Well Samples from Susquehanna County, Pennsylvania

| Water Well ID | Sample Date | Sampling Port           | Topographic Location | Gas Extraction Area (Within 1 km of Active Gas Well) | Dissolved Oxygen - Field (mg/L) | Ethane ug/L | Hardness (mg/L) | Iron (mg/L) | Lead (mg/L) | Magnesium (mg/L) | Manganese (mg/L) | Mercury (mg/L) | Methane ug/L | Nitrate as N (mg/L) | Oil Grease (mg/L) | pH - Field (SU) | Potassium (mg/L) |
|---------------|-------------|-------------------------|----------------------|------------------------------------------------------|---------------------------------|-------------|-----------------|-------------|-------------|------------------|------------------|----------------|--------------|---------------------|-------------------|-----------------|------------------|
| 767           | 7/14/2011   | Spigot On Side Of House | Valley               |                                                      | 3.07                            | 1.4         |                 |             |             |                  |                  |                | 6100         |                     |                   | 7.49            |                  |
| 768           | 7/14/2011   | Kitchen Sink            | Valley               |                                                      | 10.65                           | 2.9         |                 |             |             |                  |                  |                | 11000        |                     |                   | 7.81            |                  |
| 769           | 7/14/2011   | Kitchen Sink            | Valley               |                                                      | 1.7                             | 1.4         |                 |             |             |                  |                  |                | 7700         |                     |                   | 8.5             |                  |
| 770           | 7/14/2011   | Kitchen Sink            | Valley               |                                                      | 4.69                            | < .025      |                 |             |             |                  |                  |                | 0.59         |                     |                   | 7.67            |                  |
| 771           | 7/14/2011   | Kitchen Sink            | Upland               |                                                      | 7.77                            | < .1        |                 |             |             |                  |                  |                | 0.28         |                     |                   | 7.75            |                  |
| 772           | 7/14/2011   | Kitchen Sink            | Valley               |                                                      | 1.11                            | 0.1         |                 |             |             |                  |                  |                | 1100         |                     |                   | 8.13            |                  |
| 773           | 7/14/2011   | Spigot                  | Valley               |                                                      | 5.62                            | 3.5         |                 |             |             |                  |                  |                | 13000        |                     |                   | 7.9             |                  |
| 774           | 7/15/2011   | Kitchen Sink            | Valley               |                                                      | 3.55                            | < .025      |                 |             |             |                  |                  |                | < .1         |                     |                   | 7.51            |                  |
| 775           | 7/15/2011   | Kitchen Sink            | Valley               |                                                      | 2.54                            | 0.054       |                 |             |             |                  |                  |                | 6.3          |                     |                   | 7.64            |                  |
| 776           | 7/15/2011   | Kitchen Sink            | Upland               |                                                      | 9.2                             | < .025      |                 |             |             |                  |                  |                | 0.26         |                     |                   | 7.32            |                  |
| 777           | 7/15/2011   | Kitchen Sink            | Upland               |                                                      | 7.86                            | < .025      |                 |             |             |                  |                  |                | 0.92         |                     |                   | 7.5             |                  |
| 778           | 7/15/2011   | Outside Faucet          | Valley               |                                                      | 8.06                            | 0.073       |                 |             |             |                  |                  |                | 640          |                     |                   | 7.37            |                  |
| 779           | 7/15/2011   | Kitchen Sink            | Valley               |                                                      | 5.29                            | < .025      |                 |             |             |                  |                  |                | 0.13         |                     |                   | 7.17            |                  |
| 780           | 7/15/2011   | Spigot East Of House    | Valley               |                                                      | 7.34                            | < .025      |                 |             |             |                  |                  |                | 0.15         |                     |                   | 6.9             |                  |
| 781           | 7/15/2011   | Outside Faucet          | Upland               |                                                      | 5.13                            | < .025      |                 |             |             |                  |                  |                | 0.45         |                     |                   | 7.17            |                  |
| 782           | 7/15/2011   | Outside Faucet          | Upland               |                                                      | 10.87                           | < .025      |                 |             |             |                  |                  |                | 0.36         |                     |                   | 7.63            |                  |
| 783           | 7/15/2011   | Kitchen Sink            | Upland               |                                                      | 5.58                            | < .025      |                 |             |             |                  |                  |                | 1.1          |                     |                   | 7.34            |                  |
| 784           | 7/15/2011   | Kitchen Sink            | Valley               |                                                      | 9.93                            | 0.21        |                 |             |             |                  |                  |                | 1500         |                     |                   | 7.83            |                  |
| 785           | 7/15/2011   | Kitchen Sink            | Valley               |                                                      | 3.09                            | < .025      |                 |             |             |                  |                  |                | 0.13         |                     |                   | 7.75            |                  |
| 786           | 7/15/2011   | Kitchen Sink            | Valley               |                                                      | 4.01                            | < .025      |                 |             |             |                  |                  |                | 1.2          |                     |                   | 7.52            |                  |
| 787           | 7/15/2011   | Kitchen Sink            | Valley               |                                                      | 3.71                            | < .025      |                 |             |             |                  |                  |                | 0.1          |                     |                   | 7.65            |                  |
| 788           | 7/15/2011   | Kitchen Sink            | Valley               |                                                      | 9.67                            | < .025      |                 |             |             |                  |                  |                | 0.62         |                     |                   | 7.64            |                  |
| 789           | 7/15/2011   | Kitchen Sink            | Valley               |                                                      | 9.4                             | < .025      |                 |             |             |                  |                  |                | 0.6          |                     |                   | 6.95            |                  |
| 790           | 7/15/2011   | Kitchen Sink            | Valley               |                                                      | 8.95                            | < .025      |                 |             |             |                  |                  |                | 0.67         |                     |                   | 7.7             |                  |
| 791           | 7/15/2011   | Kitchen Sink            | Upland               |                                                      | 3.36                            | < .025      |                 |             |             |                  |                  |                | 2.5          |                     |                   | 7.7             |                  |

Table S.8. Groundwater Quality Data for 1701 "Pre-Drill" Water Well Samples from Susquehanna County, Pennsylvania

| Water Well ID | Sample Date | Sampling Port                    | Topographic Location | Gas Extraction Area (Within 1 km of Active Gas Well) | Dissolved Oxygen - Field (mg/L) | Ethane ug/L | Hardness (mg/L) | Iron (mg/L) | Lead (mg/L) | Magnesium (mg/L) | Manganese (mg/L) | Mercury (mg/L) | Methane ug/L | Nitrate as N (mg/L) | Oil Grease (mg/L) | pH - Field (SU) | Potassium (mg/L) |
|---------------|-------------|----------------------------------|----------------------|------------------------------------------------------|---------------------------------|-------------|-----------------|-------------|-------------|------------------|------------------|----------------|--------------|---------------------|-------------------|-----------------|------------------|
| 792           | 7/15/2011   | Spigot On Rear Of House          | Valley               |                                                      | 4.88                            | < .025      |                 |             |             |                  |                  |                | 0.19         |                     |                   | 7.42            |                  |
| 793           | 7/15/2011   | Kitchen Sink                     | Valley               |                                                      | 9.11                            | < .025      |                 |             |             |                  |                  |                | 0.11         |                     |                   | 6.4             |                  |
| 794           | 7/15/2011   | Kitchen Sink                     | Valley               |                                                      | 9.94                            | < .025      |                 |             |             |                  |                  |                | 0.2          |                     |                   | 7.73            |                  |
| 795           | 7/16/2011   | Kitchen Faucet                   | Upland               |                                                      | 10.8                            | < .025      |                 |             |             |                  |                  |                | 1.1          |                     |                   | 6.98            |                  |
| 796           | 7/16/2011   | Kitchen Faucet                   | Valley               |                                                      | 5.64                            | < .025      |                 |             |             |                  |                  |                | 0.62         |                     |                   | 6.91            |                  |
| 797           | 7/16/2011   | Kitchen Faucet                   | Upland               |                                                      | 14.08                           | < .025      |                 |             |             |                  |                  |                | 0.57         |                     |                   | 7.48            |                  |
| 798           | 7/16/2011   | Kitchen Faucet                   | Upland               |                                                      | 18.35                           | < .025      |                 |             |             |                  |                  |                | 1.2          |                     |                   | 6.81            |                  |
| 799           | 7/16/2011   | Kitchen Sink                     | Upland               |                                                      | 12.87                           | 0.17        |                 |             |             |                  |                  |                | 1300         |                     |                   | 6.59            |                  |
| 800           | 7/17/2011   | Outside Spigot In Back Of House  | Valley               |                                                      | 9.61                            | 0.076       |                 |             |             |                  |                  |                | 200          |                     |                   | 7.86            |                  |
| 801           | 7/17/2011   | Outside Spigot On Front Of House | Valley               |                                                      | 5.62                            | < .025      |                 |             |             |                  |                  |                | 64           |                     |                   | 7.74            |                  |
| 802           | 7/17/2011   | Well                             | Upland               |                                                      | 17.32                           | < .025      |                 |             |             |                  |                  |                | 0.21         |                     |                   | 6.15            |                  |
| 803           | 7/17/2011   | Blue Well 40Ft From Road         | Upland               |                                                      | 9.13                            | 0.053       |                 |             |             |                  |                  |                | 0.7          |                     |                   | 6.73            |                  |
| 804           | 7/17/2011   | Kitchen Faucet                   | Upland               |                                                      | 13.45                           | 0.053       |                 |             |             |                  |                  |                | 0.12         |                     |                   | 7.34            |                  |
| 805           | 7/17/2011   | Spigot From Garage               | Valley               |                                                      | 12.66                           | < .025      |                 |             |             |                  |                  |                | 0.14         |                     |                   | 6.08            |                  |
| 806           | 7/18/2011   | Outside Spigot                   | Upland               |                                                      | 8.95                            | < .025      |                 |             |             |                  |                  |                | 0.4          |                     |                   | 7.88            |                  |
| 807           | 7/18/2011   | Kitchen Sink                     | Upland               |                                                      | 9.17                            | < .025      |                 |             |             |                  |                  |                | 0.23         |                     |                   | 6.35            |                  |
| 808           | 7/18/2011   | Outside Spigot                   | Upland               |                                                      | 6                               | < .025      |                 |             |             |                  |                  |                | 0.14         |                     |                   | 6.79            |                  |
| 809           | 7/18/2011   | Kitchen Sink                     | Valley               |                                                      | 5.36                            | 3           |                 |             |             |                  |                  |                | 14000        |                     |                   | 7.41            |                  |
| 810           | 7/18/2011   | Kitchen Sink                     | Upland               |                                                      | 9.93                            | < .025      |                 |             |             |                  |                  |                | 0.12         |                     |                   | 6.53            |                  |
| 811           | 7/18/2011   | Kitchen Sink                     | Valley               |                                                      | 9.84                            | < .025      |                 |             |             |                  |                  |                | 0.22         |                     |                   | 6.29            |                  |
| 812           | 7/18/2011   | Kitchen Sink                     | Valley               |                                                      | 5.94                            | 0.15        |                 |             |             |                  |                  |                | 600          |                     |                   | 6.18            |                  |
| 813           | 7/19/2011   |                                  | Upland               |                                                      |                                 | < .025      |                 |             |             |                  |                  |                | < .1         |                     |                   |                 |                  |
| 814           | 7/19/2011   | Garage Sink                      | Valley               |                                                      | 3.92                            | <0.025      |                 |             |             |                  |                  |                | 0.15         |                     |                   | 7.4             |                  |
| 815           | 7/19/2011   | Kitchen Sink                     | Valley               |                                                      | 1.83                            | < .025      |                 |             |             |                  |                  |                | 2.7          |                     |                   | 7.25            |                  |

Table S.8. Groundwater Quality Data for 1701 "Pre-Drill" Water Well Samples from Susquehanna County, Pennsylvania

| Water Well ID | Sample Date | Sampling Port            | Topographic Location | Gas Extraction Area (Within 1 km of Active Gas Well) | Dissolved Oxygen - Field (mg/L) | Ethane ug/L | Hardness (mg/L) | Iron (mg/L) | Lead (mg/L) | Magnesium (mg/L) | Manganese (mg/L) | Mercury (mg/L) | Methane ug/L | Nitrate as N (mg/L) | Oil Grease (mg/L) | pH - Field (SU) | Potassium (mg/L) |
|---------------|-------------|--------------------------|----------------------|------------------------------------------------------|---------------------------------|-------------|-----------------|-------------|-------------|------------------|------------------|----------------|--------------|---------------------|-------------------|-----------------|------------------|
| 816           | 7/19/2011   | Barn 2 Pressure Tank     | Valley               |                                                      | 2.8                             | < .025      |                 |             |             |                  |                  |                | 1200         |                     |                   | 7.55            |                  |
| 817           | 7/19/2011   | Spigot On Side Of Barn   | Upland               |                                                      | 4.96                            | < .025      |                 |             |             |                  |                  |                | 0.11         |                     |                   | 7.04            |                  |
| 818           | 7/19/2011   | Well Head                | Valley               |                                                      | 9.77                            | < .025      |                 |             |             |                  |                  |                | 5.6          |                     |                   | 7.12            |                  |
| 819           | 11/23/2009  |                          | Upland               | Yes                                                  |                                 | 110         |                 | < .05       |             | 6.48             | < .025           |                | 8300         |                     |                   |                 |                  |
| 820           | 7/19/2011   | Kitchen Sink             | Valley               |                                                      | 8.79                            | < .025      |                 |             |             |                  |                  |                | 0.25         |                     |                   | 6.32            |                  |
| 821           | 7/19/2011   | Kitchen Sink             | Valley               |                                                      | 10.07                           | < .025      |                 |             |             |                  |                  |                | 0.12         |                     |                   | 7.41            |                  |
| 822           | 7/19/2011   | Kitchen Sink             | Valley               |                                                      | 2.26                            | < .025      |                 |             |             |                  |                  |                | 0.15         |                     |                   | 7.53            |                  |
| 823           | 7/19/2011   | Kitchen Sink             | Valley               |                                                      | 6.06                            | < .025      |                 |             |             |                  |                  |                | 1.9          |                     |                   | 7.28            |                  |
| 824           | 7/20/2011   | Outside Faucet           | Upland               |                                                      | 5.29                            | < .025      |                 |             |             |                  |                  |                | 0.34         |                     |                   | 6.94            |                  |
| 825           | 7/20/2011   | Inside Spigot            | Upland               |                                                      | 5.04                            | < .025      |                 |             |             |                  |                  |                | 0.15         |                     |                   | 7.61            |                  |
| 826           | 7/20/2011   | Kitchen Sink             | Upland               |                                                      | 7.72                            | < .025      |                 |             |             |                  |                  |                | < .1         |                     |                   | 6.25            |                  |
| 827           | 7/20/2011   | Kitchen Sink             | Valley               |                                                      | 8.53                            | < .025      |                 |             |             |                  |                  |                | 0.24         |                     |                   | 6.22            |                  |
| 828           | 7/20/2011   | Kitchen Sink             | Upland               |                                                      | 4.64                            | < .025      |                 |             |             |                  |                  |                | 0.19         |                     |                   | 7.47            |                  |
| 829           | 7/20/2011   | Kitchen Sink             | Valley               |                                                      | 9.48                            | < .025      |                 |             |             |                  |                  |                | 0.16         |                     |                   | 7.75            |                  |
| 830           | 7/20/2011   | Outside Spigot           | Upland               |                                                      | 14.32                           | < .025      |                 |             |             |                  |                  |                | 0.16         |                     |                   | 6.82            |                  |
| 831           | 7/20/2011   | Kitchen Sink             | Valley               |                                                      | 8.51                            | < .025      |                 |             |             |                  |                  |                | 0.16         |                     |                   | 6.55            |                  |
| 832           | 7/20/2011   | Kitchen Sink             | Valley               |                                                      | 4.24                            | < .025      |                 |             |             |                  |                  |                | < .1         |                     |                   | 7.18            |                  |
| 833           | 7/20/2011   | Outside Faucet           | Valley               |                                                      | 5.24                            | < .025      |                 |             |             |                  |                  |                | 0.54         |                     |                   | 7.86            |                  |
| 834           | 7/20/2011   | Kitchen Sink             | Upland               |                                                      | 7.05                            | < .025      |                 |             |             |                  |                  |                | 0.41         |                     |                   | 6.86            |                  |
| 835           | 7/20/2011   | Kitchen Sink             | Upland               |                                                      | 5.25                            | < .025      |                 |             |             |                  |                  |                | 13           |                     |                   | 7.97            |                  |
| 836           | 7/21/2011   | Outside Faucet           | Upland               |                                                      | 4.68                            | < .025      |                 |             |             |                  |                  |                | 0.66         |                     |                   | 6.98            |                  |
| 837           | 7/21/2011   | Spigot In Front Of House | Upland               |                                                      | 8.15                            | < .025      |                 |             |             |                  |                  |                | < .1         |                     |                   | 7.58            |                  |
| 838           | 7/21/2011   | Kitchen Sink             | Valley               |                                                      | 1.43                            | < .025      |                 |             |             |                  |                  |                | 1.5          |                     |                   | 7.62            |                  |
| 839           | 7/21/2011   | Kitchen Sink             | Upland               |                                                      | 2.46                            | < .025      |                 |             |             |                  |                  |                | 0.14         |                     |                   | 7.5             |                  |
| 840           | 7/21/2011   | Kitchen Sink             | Upland               |                                                      | 5.06                            | < .025      |                 |             |             |                  |                  |                | 0.16         |                     |                   | 7.52            |                  |

Table S.8. Groundwater Quality Data for 1701 "Pre-Drill" Water Well Samples from Susquehanna County, Pennsylvania

| Water Well ID | Sample Date | Sampling Port             | Topographic Location | Gas Extraction Area (Within 1 km of Active Gas Well) | Dissolved Oxygen - Field (mg/L) | Ethane ug/L | Hardness (mg/L) | Iron (mg/L) | Lead (mg/L) | Magnesium (mg/L) | Manganese (mg/L) | Mercury (mg/L) | Methane ug/L | Nitrate as N (mg/L) | Oil Grease (mg/L) | pH - Field (SU) | Potassium (mg/L) |
|---------------|-------------|---------------------------|----------------------|------------------------------------------------------|---------------------------------|-------------|-----------------|-------------|-------------|------------------|------------------|----------------|--------------|---------------------|-------------------|-----------------|------------------|
| 841           | 7/21/2011   | Kitchen Sink              | Valley               |                                                      | 3.25                            | <0.025      |                 |             |             |                  |                  |                | 1.8          |                     |                   | 8.07            |                  |
| 842           | 7/21/2011   | Kitchen Sink              | Valley               |                                                      | 3.67                            | 0.061       |                 |             |             |                  |                  |                | 620          |                     |                   | 6.37            |                  |
| 843           | 7/21/2011   | Kitchen Sink              | Upland               |                                                      | 7.95                            | < .025      |                 |             |             |                  |                  |                | 0.12         |                     |                   | 6.82            |                  |
| 844           | 7/21/2011   | Pressure Tank             | Upland               |                                                      | 4.23                            | < .025      |                 |             |             |                  |                  |                | 4.7          |                     |                   | 6.4             |                  |
| 845           | 7/21/2011   | Basement Sink             | Upland               |                                                      | 9.56                            | < .025      |                 |             |             |                  |                  |                | < .1         |                     |                   | 7.88            |                  |
| 846           | 7/21/2011   | Kitchen Sink              | Upland               |                                                      | 7.28                            | < .025      |                 |             |             |                  |                  |                | < .1         |                     |                   | 7.03            |                  |
| 847           | 7/21/2011   | Spigot In Rear Of House   | Upland               |                                                      | 3.45                            | < .025      |                 |             |             |                  |                  |                | 3.2          |                     |                   | 7.63            |                  |
| 848           | 7/21/2011   | Kitchen Sink              | Valley               |                                                      | 2.42                            | < .025      |                 |             |             |                  |                  |                | 2.1          |                     |                   | 7.62            |                  |
| 849           | 7/21/2011   | Kitchen Sink              | Valley               |                                                      | 4.7                             | < .025      |                 |             |             |                  |                  |                | 0.18         |                     |                   | 7.94            |                  |
| 850           | 7/22/2011   | Kitchen Sink              | Valley               |                                                      | 6.74                            | < .025      |                 |             |             |                  |                  |                | 0.38         |                     |                   | 6.5             |                  |
| 851           | 7/22/2011   | Outside Spigot            | Valley               |                                                      | 2.91                            | 0.35        |                 |             |             |                  |                  |                | 2300         |                     |                   | 8.41            |                  |
| 852           | 7/22/2011   | Kitchen Sink              | Valley               |                                                      | 2.41                            | < .025      |                 |             |             |                  |                  |                | 2.2          |                     |                   | 7.83            |                  |
| 853           | 7/22/2011   | Kitchen Sink              | Valley               |                                                      | 4.62                            | < .025      |                 |             |             |                  |                  |                | 0.56         |                     |                   | 7.29            |                  |
| 854           | 7/22/2011   | Kitchen Sink              | Valley               |                                                      | 6.3                             | < .025      |                 |             |             |                  |                  |                | 0.26         |                     |                   | 7.17            |                  |
| 855           | 7/22/2011   | Pipe Overflow             | Valley               |                                                      | 3.6                             | 1.7         |                 |             |             |                  |                  |                | 7900         |                     |                   | 6.12            |                  |
| 856           | 7/22/2011   | Kitchen Sink              | Valley               |                                                      | 4.25                            | 0.045       |                 |             |             |                  |                  |                | 9.4          |                     |                   | 7.49            |                  |
| 857           | 7/22/2011   | Pressure Tank In Garage   | Valley               |                                                      | 2.29                            | 6.7         |                 |             |             |                  |                  |                | 17000        |                     |                   | 7.29            |                  |
| 858           | 11/5/2009   | Basement At Pressure Tank | Valley               | Yes                                                  | 6.14                            | < .025      |                 | 0.16        |             | 6.45             | 0.066            |                | 2.7          |                     |                   | 8.09            |                  |
| 859           | 7/22/2011   | Outside Spigot            | Valley               |                                                      | 4.95                            | < .025      |                 |             |             |                  |                  |                | < .1         |                     |                   | 7.88            |                  |
| 860           | 7/22/2011   | Kitchen Faucet            | Valley               |                                                      | 4.27                            | < .025      |                 |             |             |                  |                  |                | 3.2          |                     |                   | 6.68            |                  |
| 861           | 7/22/2011   | Spigot Under Porch        | Valley               |                                                      | 4.34                            | < .025      |                 |             |             |                  |                  |                | < .1         |                     |                   | 6.08            |                  |
| 862           | 7/22/2011   | Kitchen Sink              | Valley               |                                                      | 1.36                            | 3.4         |                 |             |             |                  |                  |                | 12000        |                     |                   | 8.33            |                  |
| 863           | 7/22/2011   | Pressure Tank In Garage   | Valley               |                                                      | 3.84                            | 4.6         |                 |             |             |                  |                  |                | 18000        |                     |                   | 6.85            |                  |



Table S.8. Groundwater Quality Data for 1701 "Pre-Drill" Water Well Samples from Susquehanna County, Pennsylvania

| Water Well ID | Sample Date | Sampling Port       | Topographic Location | Gas Extraction Area (Within 1 km of Active Gas Well) | Dissolved Oxygen - Field (mg/L) | Ethane ug/L | Hardness (mg/L) | Iron (mg/L) | Lead (mg/L) | Magnesium (mg/L) | Manganese (mg/L) | Mercury (mg/L) | Methane ug/L | Nitrate as N (mg/L) | Oil Grease (mg/L) | pH - Field (SU) | Potassium (mg/L) |
|---------------|-------------|---------------------|----------------------|------------------------------------------------------|---------------------------------|-------------|-----------------|-------------|-------------|------------------|------------------|----------------|--------------|---------------------|-------------------|-----------------|------------------|
| 864           | 7/22/2011   | Kitchen Sink        | Upland               |                                                      | 5.84                            | < .025      |                 |             |             |                  |                  |                | 0.23         |                     |                   | 7.49            |                  |
| 865           | 7/22/2011   | Kitchen Sink        | Upland               |                                                      | 5.82                            | < .025      |                 |             |             |                  |                  |                | 0.17         |                     |                   | 7.72            |                  |
| 866           | 7/22/2011   | Kitchen Sink        | Upland               |                                                      | 5.61                            | 0.025       |                 |             |             |                  |                  |                | 1.2          |                     |                   | 7.9             |                  |
| 867           | 11/5/2009   | Kitchen Sink        | Upland               | Yes                                                  | 3.34                            | < .025      |                 | < .05       |             | < 1              | < .025           |                | 0.72         |                     |                   | 8.19            |                  |
| 868           | 7/22/2011   | Kitchen Sink        | Valley               |                                                      | 4.23                            | 120         |                 |             |             |                  |                  |                | 12000        |                     |                   | 7.64            |                  |
| 869           | 7/22/2011   | Pressure Tank       | Valley               |                                                      | 5.12                            | 2.6         |                 |             |             |                  |                  |                | 8900         |                     |                   | 8.68            |                  |
| 870           | 7/25/2011   | Kitchen Sink        | Valley               |                                                      | 5.31                            | 0.046       |                 |             |             |                  |                  |                | 360          |                     |                   | 6.11            |                  |
| 871           | 7/25/2011   | Kitchen Sink        | Valley               |                                                      | 2.27                            | 0.21        |                 |             |             |                  |                  |                | 1600         |                     |                   | 6.99            |                  |
| 872           | 7/25/2011   | Kitchen Sink        | Upland               |                                                      | 5.79                            | < .025      |                 |             |             |                  |                  |                | 0.22         |                     |                   | 6.68            |                  |
| 873           | 7/25/2011   | Kitchen Sink        | Upland               |                                                      |                                 | < .025      |                 |             |             |                  |                  |                | 110          |                     |                   | 6.5             |                  |
| 874           | 7/25/2011   | Kitchen Sink        | Upland               |                                                      | 2.39                            | 0.16        |                 |             |             |                  |                  |                | 870          |                     |                   | 6.56            |                  |
| 875           | 7/25/2011   | Kitchen Sink        | Upland               |                                                      | 4.84                            | < .025      |                 |             |             |                  |                  |                | 3.6          |                     |                   | 6.89            |                  |
| 876           | 7/25/2011   | Warehouse At Quarry | Upland               |                                                      | 10.48                           | 0.026       |                 |             |             |                  |                  |                | 0.44         |                     |                   | 6.54            |                  |
| 877           | 7/25/2011   | Kitchen Sink        | Valley               |                                                      | 1.73                            | 0.1         |                 |             |             |                  |                  |                | 1800         |                     |                   | 8.51            |                  |
| 878           | 7/25/2011   | Kitchen Sink        | Upland               |                                                      | 4.73                            | < .025      |                 |             |             |                  |                  |                | 0.39         |                     |                   | 7.84            |                  |
| 879           | 7/25/2011   | Kitchen Sink        | Valley               |                                                      | 1.53                            | 1.9         |                 |             |             |                  |                  |                | 8800         |                     |                   | 8.26            |                  |
| 880           | 1/3/2010    | Pressure Tank       | Upland               | Yes                                                  | 6.54                            | < .025      |                 | < .05       |             | 6.86             | < .025           |                | 5.6          |                     |                   | 7.58            |                  |
| 881           | 7/25/2011   | Kitchen Sink        | Valley               |                                                      | 1.75                            | < .025      |                 |             |             |                  |                  |                | 0.34         |                     |                   | 7.83            |                  |
| 882           | 7/25/2011   | Pressure Tank       | Valley               |                                                      | 5.67                            | 2.8         |                 |             |             |                  |                  |                | 12000        |                     |                   | 8.11            |                  |
| 883           | 7/26/2011   | Kitchen Sink        | Valley               |                                                      | 2.1                             | < .025      |                 |             |             |                  |                  |                | 0.43         |                     |                   | 7.86            |                  |
| 884           | 7/26/2011   | Kitchen Sink        | Valley               |                                                      | 7.79                            | < .025      |                 |             |             |                  |                  |                | 0.19         |                     |                   | 6.11            |                  |
| 885           | 7/26/2011   | Kitchen Sink        | Valley               |                                                      | 4.06                            | 0.067       |                 |             |             |                  |                  |                | 520          |                     |                   | 6.59            |                  |
| 886           | 7/26/2011   | Kitchen Sink        | Valley               |                                                      | 8.27                            | 0.063       |                 |             |             |                  |                  |                | 1900         |                     |                   | 6.87            |                  |
| 887           | 7/26/2011   | Kitchen Sink        | Valley               |                                                      | 7.84                            | < .025      |                 |             |             |                  |                  |                | 0.41         |                     |                   | 6.35            |                  |
| 888           | 12/22/2009  | Pressure Tank       | Upland               | Yes                                                  | 9.47                            | < .025      |                 | < .05       |             | 1.82             | < .025           |                | 1.2          |                     |                   | 7.21            |                  |

Table S.8. Groundwater Quality Data for 1701 "Pre-Drill" Water Well Samples from Susquehanna County, Pennsylvania

| Water Well ID | Sample Date | Sampling Port   | Topographic Location | Gas Extraction Area (Within 1 km of Active Gas Well) | Dissolved Oxygen - Field (mg/L) | Ethane ug/L | Hardness (mg/L) | Iron (mg/L) | Lead (mg/L) | Magnesium (mg/L) | Manganese (mg/L) | Mercury (mg/L) | Methane ug/L | Nitrate as N (mg/L) | Oil Grease (mg/L) | pH - Field (SU) | Potassium (mg/L) |
|---------------|-------------|-----------------|----------------------|------------------------------------------------------|---------------------------------|-------------|-----------------|-------------|-------------|------------------|------------------|----------------|--------------|---------------------|-------------------|-----------------|------------------|
| 889           | 7/26/2011   | Kitchen Sink    | Upland               |                                                      | 8.86                            | < .025      |                 |             |             |                  |                  |                | 0.22         |                     |                   | 7.26            |                  |
| 890           | 7/26/2011   | Pipe From Well  | Valley               |                                                      | 3.47                            | < .025      |                 |             |             |                  |                  |                | 26           |                     |                   | 7.85            |                  |
| 891           | 7/26/2011   | Outside Spigot  | Upland               |                                                      | 5.28                            | < .025      |                 |             |             |                  |                  |                | 1.6          |                     |                   | 6.22            |                  |
| 892           | 7/26/2011   | Outside Spigot  | Valley               |                                                      | 5.87                            | < .025      |                 |             |             |                  |                  |                | 2            |                     |                   | 6.52            |                  |
| 893           | 7/26/2011   | Outside Spigot  | Upland               |                                                      | 6.43                            | < .025      |                 |             |             |                  |                  |                | < .1         |                     |                   | 6.75            |                  |
| 894           | 7/26/2011   | Kitchen Sink    | Valley               |                                                      | 6.92                            | < .025      |                 |             |             |                  |                  |                | 0.15         |                     |                   | 6.7             |                  |
| 895           | 12/15/2009  | Pressure Tank   | Upland               |                                                      |                                 |             |                 | 0.109       |             | 8.61             | < .025           |                | < .1         |                     |                   |                 |                  |
| 896           | 7/26/2011   | Outside Spigot  | Upland               |                                                      | 6.24                            | < .025      |                 |             |             |                  |                  |                | 0.14         |                     |                   | 6.67            |                  |
| 897           | 7/26/2011   | Kitchen Sink    | Valley               |                                                      | 5.99                            | < .025      |                 |             |             |                  |                  |                | 0.1          |                     |                   | 7.05            |                  |
| 898           | 7/26/2011   | Outside Spigot  | Upland               |                                                      | 6.68                            | < .025      |                 |             |             |                  |                  |                | 0.19         |                     |                   | 6.92            |                  |
| 899           | 7/26/2011   | Kitchen Sink    | Upland               |                                                      | 10.33                           | < .025      |                 |             |             |                  |                  |                | 0.18         |                     |                   | 6.93            |                  |
| 900           | 7/26/2011   | Kitchen Sink    | Upland               |                                                      | 8.47                            | < .025      |                 |             |             |                  |                  |                | 0.19         |                     |                   | 6.94            |                  |
| 901           | 7/27/2011   | Kitchen Sink    | Upland               |                                                      | 6.21                            | < .025      |                 |             |             |                  |                  |                | < .1         |                     |                   | 7.26            |                  |
| 902           | 7/27/2011   | Outside Faucet  | Valley               |                                                      | 3.9                             | < .025      |                 |             |             |                  |                  |                | 1.1          |                     |                   | 7.58            |                  |
| 903           | 7/27/2011   | Basement Spigot | Valley               |                                                      | 9.33                            | < .025      |                 |             |             |                  |                  |                | 0.26         |                     |                   | 6.89            |                  |
| 904           | 12/17/2009  | Pressure Tank   | Valley               | Yes                                                  | 2.22                            | 0.48        |                 | 0.076       |             | 4.49             | 0.09             |                | 6500         |                     |                   | 7.87            |                  |
| 905           | 7/27/2011   | Kitchen Sink    | Valley               |                                                      | 5.16                            | < .025      |                 |             |             |                  |                  |                | 2.2          |                     |                   | 7.72            |                  |
| 906           | 7/27/2011   | Kitchen Sink    | Valley               |                                                      | 7.14                            | < .025      |                 |             |             |                  |                  |                | 0.12         |                     |                   | 6.46            |                  |
| 907           | 7/27/2011   | Kitchen Sink    | Upland               |                                                      | 9.13                            | < .025      |                 |             |             |                  |                  |                | 0.22         |                     |                   | 7.75            |                  |
| 908           | 7/27/2011   | Pipe Overflow   | Valley               |                                                      | 8.08                            | 0.028       |                 |             |             |                  |                  |                | 1.2          |                     |                   | 6.55            |                  |
| 909           | 7/27/2011   | Pressure Tank   | Upland               |                                                      | 8.34                            | < .025      |                 |             |             |                  |                  |                | 0.17         |                     |                   | 6.94            |                  |
| 910           | 7/27/2011   | Kitchen Sink    | Upland               |                                                      | 9.68                            | < .025      |                 |             |             |                  |                  |                | 0.2          |                     |                   | 6.61            |                  |
| 911           | 7/27/2011   | Kitchen Sink    | Upland               |                                                      | 8.28                            | < .025      |                 |             |             |                  |                  |                | 0.28         |                     |                   | 6.63            |                  |
| 912           | 7/27/2011   | Outside Spigot  | Valley               |                                                      | 6.45                            | < .025      |                 |             |             |                  |                  |                | 1            |                     |                   | 7.68            |                  |
| 913           | 7/27/2011   | Kitchen Sink    | Valley               |                                                      | 9.43                            | < .025      |                 |             |             |                  |                  |                | 0.1          |                     |                   | 8.2             |                  |

Table S.8. Groundwater Quality Data for 1701 "Pre-Drill" Water Well Samples from Susquehanna County, Pennsylvania

| Water Well ID | Sample Date | Sampling Port             | Topographic Location | Gas Extraction Area (Within 1 km of Active Gas Well) | Dissolved Oxygen - Field (mg/L) | Ethane ug/L | Hardness (mg/L) | Iron (mg/L) | Lead (mg/L) | Magnesium (mg/L) | Manganese (mg/L) | Mercury (mg/L) | Methane ug/L | Nitrate as N (mg/L) | Oil Grease (mg/L) | pH - Field (SU) | Potassium (mg/L) |
|---------------|-------------|---------------------------|----------------------|------------------------------------------------------|---------------------------------|-------------|-----------------|-------------|-------------|------------------|------------------|----------------|--------------|---------------------|-------------------|-----------------|------------------|
| 914           | 7/27/2011   | Kitchen Sink              | Upland               |                                                      | 8.42                            | < .025      |                 |             |             |                  |                  |                | 0.38         |                     |                   | 7.82            |                  |
| 915           | 7/27/2011   | Kitchen Sink              | Upland               |                                                      | 4.22                            | < .025      |                 |             |             |                  |                  |                | 1.1          |                     |                   | 7.74            |                  |
| 916           | 7/28/2011   | Kitchen Sink              | Upland               |                                                      | 4.65                            | < .025      |                 |             |             |                  |                  |                | 0.15         |                     |                   | 7.66            |                  |
| 917           | 7/28/2011   | Kitchen Sink              | Valley               |                                                      | 13.86                           | < .025      |                 |             |             |                  |                  |                | 0.26         |                     |                   | 7.26            |                  |
| 918           | 7/28/2011   | Kitchen Sink              | Upland               |                                                      | 12.15                           | < .025      |                 |             |             |                  |                  |                | 0.35         |                     |                   | 6.85            |                  |
| 919           | 7/28/2011   | Kitchen Sink              | Upland               |                                                      | 11.11                           | < .025      |                 |             |             |                  |                  |                | 0.21         |                     |                   | 6.54            |                  |
| 920           | 7/28/2011   | Kitchen Sink              | Valley               |                                                      | 17.7                            | < .025      |                 |             |             |                  |                  |                | 0.31         |                     |                   | 7.2             |                  |
| 921           | 7/28/2011   | Outside Spigot            | Valley               | Yes                                                  | 5.96                            | 2.2         |                 |             |             |                  |                  |                | 11000        |                     |                   | 6.74            |                  |
| 922           | 7/29/2011   | Kitchen Sink              | Valley               |                                                      | 6.86                            | < .025      |                 |             |             |                  |                  |                | 0.33         |                     |                   | 7.76            |                  |
| 923           | 12/14/2009  | Basement At Pressure Tank | Valley               | Yes                                                  |                                 |             |                 | < .05       |             | 8.42             | < .025           |                | 0.13         |                     |                   |                 |                  |
| 924           | 12/17/2009  | Kitchen Sink              | Valley               |                                                      | 4.65                            | < .025      |                 | < .05       |             | 9.18             | < .025           |                | 0.5          |                     |                   | 7.83            |                  |
| 925           | 12/13/2009  | Pressure Tank             | Valley               |                                                      |                                 |             |                 | 0.128       |             | 2.17             | < .025           |                | 0.93         |                     |                   |                 |                  |
| 926           | 7/29/2011   | Kitchen Sink              | Valley               |                                                      | 5.32                            | < .025      |                 |             |             |                  |                  |                | 0.52         |                     |                   | 7.63            |                  |
| 927           | 7/29/2011   | Bathroom Sink             | Valley               |                                                      | 5.77                            | < .025      |                 |             |             |                  |                  |                | 0.16         |                     |                   | 7.63            |                  |
| 928           | 7/29/2011   | Kitchen Sink              | Upland               |                                                      | 6.77                            | < .025      |                 |             |             |                  |                  |                | 75           |                     |                   | 8               |                  |
| 929           | 7/29/2011   | Spigot On Side Of House   | Upland               |                                                      | 15.93                           | < .025      |                 |             |             |                  |                  |                | 0.14         |                     |                   | 7.06            |                  |
| 930           | 7/29/2011   | Bathroom Sink             | Upland               |                                                      | 6.86                            | < .025      |                 |             |             |                  |                  |                | 0.44         |                     |                   | 7.5             |                  |
| 931           | 12/21/2009  | Pressure Tank             | Valley               | Yes                                                  | 3.29                            | 37          |                 | 0.375       |             | 4.8              | 0.101            |                | 43000        |                     |                   | 8.02            |                  |
| 932           | 7/29/2011   | Spigot On Side Of House   | Upland               |                                                      | 4.7                             | < .025      |                 |             |             |                  |                  |                | 0.18         |                     |                   | 7.85            |                  |
| 933           | 7/30/2011   | Kitchen Sink              | Valley               |                                                      | 2.55                            | 0.34        |                 |             |             |                  |                  |                | 390          |                     |                   | 8.19            |                  |
| 934           | 7/30/2011   | Outside Spigot            | Valley               |                                                      | 7.66                            | < .025      |                 |             |             |                  |                  |                | 0.11         |                     |                   | 6.99            |                  |
| 935           | 7/30/2011   | Kitchen Sink              | Upland               |                                                      | 3.31                            | < .025      |                 |             |             |                  |                  |                | 0.22         |                     |                   | 7.23            |                  |
| 936           | 7/30/2011   | Basement Sink             | Upland               |                                                      | 8.23                            | 0.026       |                 |             |             |                  |                  |                | 74           |                     |                   | 6.49            |                  |
| 937           | 7/30/2011   | Outside Spigot            | Valley               |                                                      | 5.21                            | < .025      |                 |             |             |                  |                  |                | 2.8          |                     |                   | 6.9             |                  |

Table S.8. Groundwater Quality Data for 1701 "Pre-Drill" Water Well Samples from Susquehanna County, Pennsylvania

| Water Well ID | Sample Date | Sampling Port                 | Topographic Location | Gas Extraction Area (Within 1 km of Active Gas Well) | Dissolved Oxygen - Field (mg/L) | Ethane ug/L | Hardness (mg/L) | Iron (mg/L) | Lead (mg/L) | Magnesium (mg/L) | Manganese (mg/L) | Mercury (mg/L) | Methane ug/L | Nitrate as N (mg/L) | Oil Grease (mg/L) | pH - Field (SU) | Potassium (mg/L) |
|---------------|-------------|-------------------------------|----------------------|------------------------------------------------------|---------------------------------|-------------|-----------------|-------------|-------------|------------------|------------------|----------------|--------------|---------------------|-------------------|-----------------|------------------|
| 938           | 7/30/2011   | Pressure Tank                 | Valley               |                                                      | 2.21                            | 2.8         |                 |             |             |                  |                  |                | 11000        |                     |                   | 8.31            |                  |
| 939           | 7/30/2011   | Kitchen Sink                  | Upland               |                                                      | 4.95                            | < .025      |                 |             |             |                  |                  |                | 2.8          |                     |                   | 7.39            |                  |
| 940           | 7/30/2011   | Kitchen Sink                  | Upland               |                                                      | 6.92                            | < .025      |                 |             |             |                  |                  |                | 0.12         |                     |                   | 6.5             |                  |
| 941           | 8/1/2011    | Outside Spigot                | Valley               |                                                      | 3.46                            | < .025      |                 |             |             |                  |                  |                | 0.1          |                     |                   | 6.09            |                  |
| 942           | 8/1/2011    | Kitchen Sink                  | Upland               |                                                      | 4.37                            | < .025      |                 |             |             |                  |                  |                | 1.6          |                     |                   | 7.06            |                  |
| 943           | 8/1/2011    | Kitchen Sink                  | Valley               |                                                      | 2.68                            | 0.62        |                 |             |             |                  |                  |                | 1800         |                     |                   | 7.31            |                  |
| 944           | 8/1/2011    | Kitchen Sink                  | Valley               |                                                      | 8.47                            | < .025      |                 |             |             |                  |                  |                | 0.11         |                     |                   | 6.7             |                  |
| 945           | 8/1/2011    | Pressure Tank                 | Upland               | Yes                                                  | 7.68                            | < .025      |                 |             |             |                  |                  |                | 0.59         |                     |                   | 6.5             |                  |
| 946           | 8/1/2011    | Outside Spigot                | Valley               |                                                      | 11.13                           | < .025      |                 |             |             |                  |                  |                | 1.1          |                     |                   | 6.72            |                  |
| 947           | 12/21/2009  | Pressure Tank-Tenants House   | Upland               |                                                      | 6.2                             | < .025      |                 | < .05       |             | 4.37             | < .025           |                | 2.9          |                     |                   | 7.52            |                  |
| 948           | 8/1/2011    | Kitchen Sink                  | Upland               |                                                      | 8.8                             | < .025      |                 |             |             |                  |                  |                | 0.32         |                     |                   | 7.03            |                  |
| 949           | 8/1/2011    | Spigot On Garage              | Valley               |                                                      | 11.11                           | < .025      |                 |             |             |                  |                  |                | 0.45         |                     |                   | 6.28            |                  |
| 950           | 8/1/2011    | Spigot On South Side Of House | Valley               |                                                      | 8.3                             | < .025      |                 |             |             |                  |                  |                | 0.17         |                     |                   | 6.58            |                  |
| 951           | 8/1/2011    | Shop Sink                     | Upland               |                                                      | 3.62                            | < .025      |                 |             |             |                  |                  |                | 1.9          |                     |                   | 6.94            |                  |
| 952           | 8/1/2011    | Pressure Tank                 | Valley               |                                                      | 11.14                           | < .025      |                 |             |             |                  |                  |                | 0.16         |                     |                   | 6.84            |                  |
| 953           | 8/2/2011    | Kitchen Sink                  | Upland               |                                                      | 11.02                           | < .025      |                 |             |             |                  |                  |                | < .1         |                     |                   | 6.53            |                  |
| 954           | 8/2/2011    | Kitchen Sink                  | Valley               |                                                      |                                 | < .025      |                 |             |             |                  |                  |                | 0.1          |                     |                   |                 |                  |
| 955           | 8/2/2011    | Kitchen Sink                  | Valley               |                                                      |                                 | < .025      |                 |             |             |                  |                  |                | 0.14         |                     |                   |                 |                  |
| 956           | 8/2/2011    | Kitchen Sink                  | Valley               |                                                      | 5.22                            | < .025      |                 |             |             |                  |                  |                | < .1         |                     |                   | 6.77            |                  |
| 957           | 8/2/2011    | Kitchen Sink                  | Upland               |                                                      | 8.08                            | < .025      |                 |             |             |                  |                  |                | 0.69         |                     |                   | 6.97            |                  |
| 958           | 8/2/2011    | Pressure Tank                 | Valley               |                                                      | 11.96                           | < .025      |                 |             |             |                  |                  |                | 0.1          |                     |                   | 6.37            |                  |
| 959           | 8/2/2011    | Kitchen Sink                  | Upland               |                                                      | 3.82                            | < .025      |                 |             |             |                  |                  |                | 0.18         |                     |                   | 6.97            |                  |
| 960           | 8/2/2011    | Kitchen Sink                  | Upland               |                                                      | 3.25                            | < .025      |                 |             |             |                  |                  |                | 0.68         |                     |                   | 7.09            |                  |

Table S.8. Groundwater Quality Data for 1701 "Pre-Drill" Water Well Samples from Susquehanna County, Pennsylvania

| Water Well ID | Sample Date | Sampling Port                               | Topographic Location | Gas Extraction Area (Within 1 km of Active Gas Well) | Dissolved Oxygen - Field (mg/L) | Ethane ug/L | Hardness (mg/L) | Iron (mg/L) | Lead (mg/L) | Magnesium (mg/L) | Manganese (mg/L) | Mercury (mg/L) | Methane ug/L | Nitrate as N (mg/L) | Oil Grease (mg/L) | pH - Field (SU) | Potassium (mg/L) |
|---------------|-------------|---------------------------------------------|----------------------|------------------------------------------------------|---------------------------------|-------------|-----------------|-------------|-------------|------------------|------------------|----------------|--------------|---------------------|-------------------|-----------------|------------------|
| 961           | 8/2/2011    | Spigot Across The Road From Office Building | Valley               |                                                      |                                 | 2.3         |                 |             |             |                  |                  |                | 12000        |                     |                   |                 |                  |
| 962           | 8/2/2011    | Kitchen Sink                                | Upland               |                                                      | 6.87                            | < .025      |                 |             |             |                  |                  |                | 6.8          |                     |                   | 7.22            |                  |
| 963           | 8/5/2011    | Kitchen Sink                                | Valley               |                                                      | 6.73                            | < .025      |                 |             |             |                  |                  |                | 0.25         |                     |                   | 7.73            |                  |
| 964           | 8/5/2011    | Kitchen Sink                                | Valley               |                                                      | 2.93                            | 5.4         |                 |             |             |                  |                  |                | 16000        |                     |                   | 7.77            |                  |
| 965           | 8/5/2011    | Spigot On Side Of House                     | Valley               |                                                      |                                 | <0.025      |                 |             |             |                  |                  |                | 0.2          |                     |                   |                 |                  |
| 966           | 8/5/2011    | Spigot In Shed Behind House                 | Upland               |                                                      | 6.13                            | < .025      |                 |             |             |                  |                  |                | 1.4          |                     |                   | 7.42            |                  |
| 967           | 8/5/2011    | Pressure Tank                               | Valley               |                                                      | 2.36                            | 0.22        |                 |             |             |                  |                  |                | 900          |                     |                   | 8.02            |                  |
| 968           | 8/5/2011    | Kitchen Sink                                | Upland               | Yes                                                  | 5.6                             | < .025      |                 |             |             |                  |                  |                | 0.13         |                     |                   | 6.99            |                  |
| 969           | 8/5/2011    | Outside Spigot                              | Valley               |                                                      | 4.82                            | 3.6         |                 |             |             |                  |                  |                | 13000        |                     |                   | 8.33            |                  |
| 970           | 12/15/2009  | Pressure Tank                               | Upland               | Yes                                                  | 8.16                            | < .025      |                 | 0.478       |             | 4.09             | < .025           |                | 0.54         |                     |                   | 7.01            |                  |
| 971           | 8/5/2011    | Kitchen Sink                                | Upland               |                                                      | 6.06                            | < .025      |                 |             |             |                  |                  |                | 0.46         |                     |                   | 7.06            |                  |
| 972           | 8/5/2011    | Kitchen Sink                                | Upland               |                                                      | 6.35                            | < .025      |                 |             |             |                  |                  |                | < .1         |                     |                   | 7               |                  |
| 973           | 8/5/2011    | Outside Spigot                              | Valley               |                                                      | 2.48                            | < .025      |                 |             |             |                  |                  |                | 27           |                     |                   | 7.78            |                  |
| 974           | 8/5/2011    | Outside Spigot                              | Valley               |                                                      | 5.61                            | 0.4         |                 |             |             |                  |                  |                | 4600         |                     |                   | 7.05            |                  |
| 975           | 8/5/2011    | Spigot On Side Of House                     | Upland               |                                                      | 6.75                            | < .025      |                 |             |             |                  |                  |                | 0.24         |                     |                   | 6.53            |                  |
| 976           | 8/5/2011    | Spigot On Side Of House                     | Upland               |                                                      | 5.08                            | < .025      |                 |             |             |                  |                  |                | 0.14         |                     |                   | 7.86            |                  |
| 977           | 8/5/2011    | Kitchen Sink                                | Upland               |                                                      | 5.02                            | < .025      |                 |             |             |                  |                  |                | 0.1          |                     |                   | 8.03            |                  |
| 978           | 8/5/2011    | Spigot On Side Of House                     | Upland               |                                                      | 7.21                            | 0.1         |                 |             |             |                  |                  |                | 26           |                     |                   | 7.92            |                  |
| 979           | 8/5/2011    | Well                                        | Upland               |                                                      | 12.64                           | < .025      |                 |             |             |                  |                  |                | 0.23         |                     |                   | 6.76            |                  |
| 980           | 8/5/2011    | Pressure Tank                               | Upland               |                                                      | 10.34                           | < .025      |                 |             |             |                  |                  |                | 0.4          |                     |                   | 6.69            |                  |
| 981           | 8/5/2011    | Kitchen Sink                                | Upland               |                                                      | 2.75                            | < .025      |                 |             |             |                  |                  |                | 1.5          |                     |                   | 6.79            |                  |

Table S.8. Groundwater Quality Data for 1701 "Pre-Drill" Water Well Samples from Susquehanna County, Pennsylvania

| Water Well ID | Sample Date | Sampling Port             | Topographic Location | Gas Extraction Area (Within 1 km of Active Gas Well) | Dissolved Oxygen - Field (mg/L) | Ethane ug/L | Hardness (mg/L) | Iron (mg/L) | Lead (mg/L) | Magnesium (mg/L) | Manganese (mg/L) | Mercury (mg/L) | Methane ug/L | Nitrate as N (mg/L) | Oil Grease (mg/L) | pH - Field (SU) | Potassium (mg/L) |
|---------------|-------------|---------------------------|----------------------|------------------------------------------------------|---------------------------------|-------------|-----------------|-------------|-------------|------------------|------------------|----------------|--------------|---------------------|-------------------|-----------------|------------------|
| 982           | 8/5/2011    | Kitchen Faucet            | Valley               |                                                      | 5.57                            | 0.62        |                 |             |             |                  |                  |                | 3400         |                     |                   | 7.86            |                  |
| 983           | 1/4/2010    | Well                      | Valley               | Yes                                                  | 1.69                            | 9.4         |                 | < .05       |             | 4.3              | < .025           |                | 24000        |                     |                   | 8.36            |                  |
| 984           | 8/5/2011    | Outside Faucet            | Valley               |                                                      | 5.28                            | < .025      |                 |             |             |                  |                  |                | 570          |                     |                   | 6.23            |                  |
| 985           | 8/5/2011    | Kitchen Sink              | Upland               |                                                      | 3.46                            | < .025      |                 |             |             |                  |                  |                | 0.1          |                     |                   | 7.34            |                  |
| 986           | 8/8/2011    | Pressure Tank             | Valley               |                                                      | 4.9                             | < .025      |                 |             |             |                  |                  |                | 9.8          |                     |                   | 7.62            |                  |
| 987           | 8/8/2011    | Kitchen Sink              | Valley               |                                                      | 4.48                            | < .025      |                 |             |             |                  |                  |                | 29           |                     |                   | 7.45            |                  |
| 988           | 8/8/2011    | Kitchen Sink              | Valley               |                                                      | 4.2                             | < .025      |                 |             |             |                  |                  |                | 0.1          |                     |                   | 7.9             |                  |
| 989           | 8/8/2011    |                           | Upland               |                                                      |                                 | < .025      |                 |             |             |                  |                  |                | < .1         |                     |                   |                 |                  |
| 990           | 8/8/2011    | Kitchen Sink              | Valley               |                                                      | 4.81                            | 1.4         |                 |             |             |                  |                  |                | 4000         |                     |                   | 7.83            |                  |
| 991           | 8/8/2011    | Kitchen Sink              | Upland               |                                                      |                                 | <0.025      |                 |             |             |                  |                  |                | <0.1         |                     |                   |                 |                  |
| 992           | 8/8/2011    | Kitchen Sink              | Upland               |                                                      | 4.35                            | < .025      |                 |             |             |                  |                  |                | 0.96         |                     |                   | 7.7             |                  |
| 993           | 8/8/2011    | Outside Spigot            | Upland               |                                                      | 5.72                            | 0.036       |                 |             |             |                  |                  |                | 240          |                     |                   | 7.96            |                  |
| 994           | 8/8/2011    | Kitchen Sink              | Valley               |                                                      | 8.01                            | < .025      |                 |             |             |                  |                  |                | < .1         |                     |                   | 7.8             |                  |
| 995           | 8/8/2011    | Kitchen Sink              | Valley               |                                                      | 1.9                             | 0.7         |                 |             |             |                  |                  |                | 6300         |                     |                   | 7.34            |                  |
| 996           | 8/8/2011    | Spigoton Side Of House    | Upland               |                                                      | 4.57                            | < .025      |                 |             |             |                  |                  |                | 0.13         |                     |                   | 7.6             |                  |
| 997           | 8/8/2011    | Sink In Garage            | Upland               |                                                      | 5.9                             | < .025      |                 |             |             |                  |                  |                | < .1         |                     |                   | 6.98            |                  |
| 998           | 8/8/2011    | Kitchen Sink              | Upland               |                                                      | 7.73                            | < .025      |                 |             |             |                  |                  |                | 0.16         |                     |                   | 7.75            |                  |
| 999           | 8/8/2011    |                           | Valley               |                                                      |                                 | < .025      |                 |             |             |                  |                  |                | 0.44         |                     |                   |                 |                  |
| 1000          | 8/8/2011    | Outside Spigot            | Upland               |                                                      | 4.96                            | < .025      |                 |             |             |                  |                  |                | 1.5          |                     |                   | 7.59            |                  |
| 1001          | 8/9/2011    | Basement Sink             | Upland               |                                                      | 8.04                            | < .025      |                 |             |             |                  |                  |                | < .1         |                     |                   | 7.28            |                  |
| 1002          | 8/9/2011    | Kitchen Sink              | Valley               |                                                      | 4.78                            | 1           |                 |             |             |                  |                  |                | 4200         |                     |                   | 7.68            |                  |
| 1003          | 8/9/2011    | Pressure Tank             | Valley               |                                                      | 5.12                            | < .025      |                 |             |             |                  |                  |                | 0.12         |                     |                   | 7.89            |                  |
| 1004          | 8/9/2011    | Pressure Tank             | Valley               |                                                      | 4.12                            | < .025      |                 |             |             |                  |                  |                | 0.16         |                     |                   | 6.82            |                  |
| 1005          | 8/9/2011    | Kitchen Sink              | Valley               |                                                      | 8.59                            | < .025      |                 |             |             |                  |                  |                | 0.16         |                     |                   | 7.1             |                  |
| 1006          | 8/9/2011    | Outside Spigot            | Valley               |                                                      | 4.41                            | < .025      |                 |             |             |                  |                  |                | 0.22         |                     |                   | 7.87            |                  |
| 1007          | 12/14/2009  | Basement At Pressure Tank | Valley               |                                                      | 3.46                            | 0.041       |                 | 0.338       |             | 8.59             | 0.268            |                | 440          |                     |                   | 8.1             |                  |

Table S.8. Groundwater Quality Data for 1701 "Pre-Drill" Water Well Samples from Susquehanna County, Pennsylvania

| Water Well ID | Sample Date | Sampling Port                | Topographic Location | Gas Extraction Area (Within 1 km of Active Gas Well) | Dissolved Oxygen - Field (mg/L) | Ethane ug/L | Hardness (mg/L) | Iron (mg/L) | Lead (mg/L) | Magnesium (mg/L) | Manganese (mg/L) | Mercury (mg/L) | Methane ug/L | Nitrate as N (mg/L) | Oil Grease (mg/L) | pH - Field (SU) | Potassium (mg/L) |
|---------------|-------------|------------------------------|----------------------|------------------------------------------------------|---------------------------------|-------------|-----------------|-------------|-------------|------------------|------------------|----------------|--------------|---------------------|-------------------|-----------------|------------------|
| 1008          | 8/9/2011    | Bathroom Sink                | Valley               |                                                      | 8.3                             | < .025      |                 |             |             |                  |                  |                | 0.14         |                     |                   | 6.4             |                  |
| 1009          | 8/9/2011    | Outside Spigot               | Valley               |                                                      | 7.52                            | 1           |                 |             |             |                  |                  |                | 8000         |                     |                   | 7.92            |                  |
| 1010          | 8/9/2011    | Kitchen Sink                 | Upland               |                                                      | 8.64                            | < .025      |                 |             |             |                  |                  |                | 0.14         |                     |                   | 6.68            |                  |
| 1011          | 8/9/2011    | Kitchen Sink                 | Upland               |                                                      | 7.24                            | < .025      |                 |             |             |                  |                  |                | < .1         |                     |                   | 6.71            |                  |
| 1012          | 8/9/2011    | Kitchen Sink                 | Upland               |                                                      | 1.54                            | < .025      |                 |             |             |                  |                  |                | 88           |                     |                   | 7.48            |                  |
| 1013          | 8/9/2011    | Kitchen Sink                 | Valley               |                                                      | 6.58                            | < .025      |                 |             |             |                  |                  |                | < .1         |                     |                   | 7.25            |                  |
| 1014          | 8/9/2011    | Kitchen Sink                 | Upland               |                                                      | 2.02                            | < .025      |                 |             |             |                  |                  |                | 0.25         |                     |                   | 7.75            |                  |
| 1015          | 8/9/2011    | Kitchen Sink                 | Upland               |                                                      | 5.44                            | < .025      |                 |             |             |                  |                  |                | < .1         |                     |                   | 7.54            |                  |
| 1016          | 8/9/2011    | Kitchen Sink                 | Upland               |                                                      | 3.04                            | < .025      |                 |             |             |                  |                  |                | 0.1          |                     |                   | 7.84            |                  |
| 1017          | 7/11/2011   | Spigot On Side Of House      | Upland               |                                                      | 6.95                            | < .025      |                 |             |             |                  |                  |                | 0.4          |                     |                   | 4.77            |                  |
| 1018          | 7/12/2011   | Bathroom Sink                | Valley               |                                                      | 2.12                            | 0.33        |                 |             |             |                  |                  |                | 2100         |                     |                   | 7.81            |                  |
| 1019          | 7/12/2011   | Sink In Rear Of Far Building | Valley               |                                                      | 5.35                            | < .025      |                 |             |             |                  |                  |                | 4.1          |                     |                   | 7.43            |                  |
| 1020          | 7/21/2011   | Basement Sink                | Upland               |                                                      | 9.56                            | < .025      |                 |             |             |                  |                  |                | 0.17         |                     |                   | 7.88            |                  |
| 1021          | 7/22/2011   | Kitchen Faucet               | Upland               |                                                      | 14.01                           | 0.025       |                 |             |             |                  |                  |                | 2            |                     |                   | 7.6             |                  |
| 1022          | 7/25/2011   | Spigot Outside Barn          | Valley               |                                                      | 3.14                            | 1.4         |                 |             |             |                  |                  |                | 4900         |                     |                   | 8.64            |                  |
| 1023          | 7/25/2011   | Kitchen Sink                 | Upland               |                                                      | 7.82                            | < .025      |                 |             |             |                  |                  |                | 0.7          |                     |                   | 7.58            |                  |
| 1024          | 7/26/2011   | Outside Spigot               | Upland               |                                                      | 3.72                            | < .025      |                 |             |             |                  |                  |                | < .1         |                     |                   | 6.53            |                  |
| 1025          | 7/28/2011   |                              | Valley               |                                                      |                                 | <0.025      |                 |             |             |                  |                  |                | 64           |                     |                   |                 |                  |
| 1026          | 8/1/2011    | Kitchen Sink                 | Valley               |                                                      | 6.14                            | < .025      |                 |             |             |                  |                  |                | < .1         |                     |                   | 7.71            |                  |
| 1027          | 8/1/2011    | Kitchen Sink                 | Valley               |                                                      | 5.76                            | < .025      |                 |             |             |                  |                  |                | 0.14         |                     |                   | 7.83            |                  |
| 1028          | 8/1/2011    | Outside Spigot               | Upland               |                                                      | 2.53                            | < .025      |                 |             |             |                  |                  |                | 0.88         |                     |                   | 7.67            |                  |
| 1029          | 8/2/2011    | Pipe Overflow                | Valley               |                                                      | 12.55                           | < .025      |                 |             |             |                  |                  |                | < .1         |                     |                   | 6.47            |                  |
| 1030          | 8/2/2011    | Kitchen Faucet               | Valley               |                                                      |                                 | < .025      |                 |             |             |                  |                  |                | 0.82         |                     |                   |                 |                  |

Table S.8. Groundwater Quality Data for 1701 "Pre-Drill" Water Well Samples from Susquehanna County, Pennsylvania

| Water Well ID | Sample Date | Sampling Port                 | Topographic Location | Gas Extraction Area (Within 1 km of Active Gas Well) | Dissolved Oxygen - Field (mg/L) | Ethane ug/L | Hardness (mg/L) | Iron (mg/L) | Lead (mg/L) | Magnesium (mg/L) | Manganese (mg/L) | Mercury (mg/L) | Methane ug/L | Nitrate as N (mg/L) | Oil Grease (mg/L) | pH - Field (SU) | Potassium (mg/L) |
|---------------|-------------|-------------------------------|----------------------|------------------------------------------------------|---------------------------------|-------------|-----------------|-------------|-------------|------------------|------------------|----------------|--------------|---------------------|-------------------|-----------------|------------------|
| 1031          | 8/3/2011    | Garage Building Next To House | Valley               |                                                      | 2.48                            | 0.033       |                 |             |             |                  |                  |                | 140          |                     |                   | 6.99            |                  |
| 1032          | 8/3/2011    | Kitchen Sink                  | Upland               |                                                      | 3.91                            | < .025      |                 |             |             |                  |                  |                | 27           |                     |                   | 7.75            |                  |
| 1033          | 8/3/2011    | Outside Faucet                | Upland               |                                                      | 3.78                            | < .025      |                 |             |             |                  |                  |                | 13           |                     |                   | 7.92            |                  |
| 1034          | 8/3/2011    | Kitchen Faucet                | Valley               |                                                      |                                 | 0.036       |                 |             |             |                  |                  |                | 1.2          |                     |                   |                 |                  |
| 1035          | 12/15/2009  | Well House                    | Valley               | Yes                                                  |                                 |             |                 | < .05       |             | 2.37             | < .025           |                | 15000        |                     |                   |                 |                  |
| 1036          | 8/3/2011    | Pressure Tank                 | Upland               |                                                      | 6.14                            | < .025      |                 |             |             |                  |                  |                | 0.63         |                     |                   | 7.46            |                  |
| 1037          | 8/3/2011    | Pressure Tank                 | Upland               |                                                      | 7.09                            | < .025      |                 |             |             |                  |                  |                | 0.5          |                     |                   | 7.89            |                  |
| 1038          | 8/3/2011    | Kitchen Sink                  | Valley               |                                                      | 5.31                            | < .025      |                 |             |             |                  |                  |                | 0.12         |                     |                   | 6.61            |                  |
| 1039          | 8/3/2011    | Outside Faucet                | Valley               | Yes                                                  | 4.87                            | < .025      |                 |             |             |                  |                  |                | < .1         |                     |                   | 7.68            |                  |
| 1040          | 8/3/2011    | Outside Faucet                | Valley               |                                                      | 3.78                            | < .025      |                 |             |             |                  |                  |                | 1            |                     |                   | 7.57            |                  |
| 1041          | 8/3/2011    | Outside Faucet                | Upland               | Yes                                                  | 6.65                            | < .025      |                 |             |             |                  |                  |                | 0.12         |                     |                   | 7.51            |                  |
| 1042          | 8/3/2011    | Kitchen Sink                  | Upland               |                                                      | 11.93                           | < .025      |                 |             |             |                  |                  |                | 0.28         |                     |                   | 6.46            |                  |
| 1043          | 8/3/2011    | Pressure Tank                 | Valley               |                                                      | 7.05                            | < .025      |                 |             |             |                  |                  |                | 3.3          |                     |                   | 6.77            |                  |
| 1044          | 1/3/2010    | Pressure Tank                 | Valley               |                                                      | 7.02                            | < .025      |                 | 0.14        |             | 3.77             | < .025           |                | 3.2          |                     |                   | 6.87            |                  |
| 1045          | 8/3/2011    | Spigot                        | Valley               |                                                      | 4.51                            | 0.042       |                 |             |             |                  |                  |                | 1.6          |                     |                   | 6.77            |                  |
| 1046          | 8/3/2011    | Barn Sink                     | Valley               |                                                      | 4.04                            | < .025      |                 |             |             |                  |                  |                | 0.22         |                     |                   | 6.77            |                  |
| 1047          | 8/3/2011    | Kitchen Sink                  | Valley               |                                                      | 1.76                            | 0.097       |                 |             |             |                  |                  |                | 930          |                     |                   | 7.19            |                  |
| 1048          | 8/3/2011    | Kitchen Sink                  | Valley               |                                                      | 2.32                            | < .025      |                 |             |             |                  |                  |                | 2.5          |                     |                   | 7.9             |                  |
| 1049          | 8/3/2011    | Outside Spigot                | Valley               |                                                      | 6.59                            | < .025      |                 |             |             |                  |                  |                | 0.31         |                     |                   | 7.75            |                  |
| 1050          | 8/3/2011    | Kitchen Sink                  | Upland               |                                                      | 5.54                            | < .025      |                 |             |             |                  |                  |                | < .1         |                     |                   | 6.8             |                  |
| 1051          | 8/3/2011    | Kitchen Sink                  | Upland               |                                                      | 9.31                            | < .025      |                 |             |             |                  |                  |                | 0.27         |                     |                   | 6.38            |                  |
| 1052          | 8/3/2011    | Kitchen Sink                  | Upland               |                                                      | 5.24                            | < .025      |                 |             |             |                  |                  |                | 0.3          |                     |                   | 7.34            |                  |
| 1053          | 8/3/2011    | Kitchen Sink                  | Valley               |                                                      | 5.69                            | < .025      |                 |             |             |                  |                  |                | < .1         |                     |                   | 7.11            |                  |
| 1054          | 8/3/2011    | Pressure Tank In Basement     | Upland               |                                                      | 5.46                            | < .025      |                 |             |             |                  |                  |                | 0.14         |                     |                   | 7.07            |                  |
| 1055          | 8/3/2011    | Kitchen Sink                  | Valley               |                                                      | 7.74                            | <0.025      |                 |             |             |                  |                  |                | 0.2          |                     |                   | 7.1             |                  |



Table S.8. Groundwater Quality Data for 1701 "Pre-Drill" Water Well Samples from Susquehanna County, Pennsylvania

| Water Well ID | Sample Date | Sampling Port              | Topographic Location | Gas Extraction Area (Within 1 km of Active Gas Well) | Dissolved Oxygen - Field (mg/L) | Ethane ug/L | Hardness (mg/L) | Iron (mg/L) | Lead (mg/L) | Magnesium (mg/L) | Manganese (mg/L) | Mercury (mg/L) | Methane ug/L | Nitrate as N (mg/L) | Oil Grease (mg/L) | pH - Field (SU) | Potassium (mg/L) |
|---------------|-------------|----------------------------|----------------------|------------------------------------------------------|---------------------------------|-------------|-----------------|-------------|-------------|------------------|------------------|----------------|--------------|---------------------|-------------------|-----------------|------------------|
| 1056          | 8/3/2011    | Kitchen Sink               | Upland               |                                                      | 5.37                            | < .025      |                 |             |             |                  |                  |                | 0.17         |                     |                   | 7.03            |                  |
| 1057          | 8/4/2011    | Kitchen Sink               | Valley               |                                                      | 4.87                            | < .025      |                 |             |             |                  |                  |                | 0.15         |                     |                   | 7.17            |                  |
| 1058          | 8/4/2011    | Outside Spigot             | Upland               |                                                      | 6.27                            | < .025      |                 |             |             |                  |                  |                | < .1         |                     |                   | 6.84            |                  |
| 1059          | 8/4/2011    | Outside Spigot             | Upland               |                                                      | 6.56                            | < .025      |                 |             |             |                  |                  |                | < .1         |                     |                   | 7.9             |                  |
| 1060          | 12/21/2009  | Laundry Sink               | Upland               |                                                      | 4.13                            | 0.056       |                 | < .05       |             | < 1              | < .025           |                | 5            |                     |                   | 8.53            |                  |
| 1061          | 8/4/2011    | Spigot On Side Of House    | Upland               |                                                      | 4.8                             | < .025      |                 |             |             |                  |                  |                | 0.86         |                     |                   | 7.86            |                  |
| 1062          | 8/4/2011    | Spigot Behind House        | Valley               |                                                      | 3.89                            | 3.4         |                 |             |             |                  |                  |                | 15000        |                     |                   | 7.93            |                  |
| 1063          | 8/4/2011    | Kitchen Sink               | Valley               |                                                      | 3.05                            | < .025      |                 |             |             |                  |                  |                | 81           |                     |                   | 7.96            |                  |
| 1064          | 8/4/2011    | Kitchen Sink               | Valley               |                                                      | 8.39                            | < .025      |                 |             |             |                  |                  |                | < .1         |                     |                   | 6.69            |                  |
| 1065          | 8/4/2011    | Kitchen Sink               | Valley               |                                                      | 5.68                            | < .025      |                 |             |             |                  |                  |                | 0.56         |                     |                   | 7.79            |                  |
| 1066          | 8/4/2011    | Outside Spigot             | Upland               |                                                      | 5.05                            | < .025      |                 |             |             |                  |                  |                | < .1         |                     |                   | 7.17            |                  |
| 1067          | 8/4/2011    | Kitchen Sink               | Upland               |                                                      | 5                               | < .025      |                 |             |             |                  |                  |                | < .1         |                     |                   | 6.74            |                  |
| 1068          | 8/4/2011    | Spigot In Rear Of Building | Valley               | Yes                                                  | 7.79                            | < .025      |                 |             |             |                  |                  |                | 9.3          |                     |                   | 6.53            |                  |
| 1069          | 4/4/2009    | Bathroom Sink First Floor  | Valley               |                                                      | 6.9                             | < .025      |                 | < .025      |             | 2.21             | < .025           |                | 2.7          |                     | < 5               | 6.95            |                  |
| 1070          | 12/28/2009  | Kitchen Sink               | Upland               |                                                      | 4.87                            | < .025      |                 | < .05       |             | 4.92             | < .025           |                | 0.28         |                     |                   | 7.79            |                  |
| 1071          | 8/4/2011    | Pressure Tank              | Valley               | Yes                                                  | 4.23                            | 0.46        |                 |             |             |                  |                  |                | 1200         |                     |                   | 8.07            |                  |
| 1072          | 8/4/2011    | Kitchen Sink               | Valley               | Yes                                                  | 6.01                            | < .025      |                 |             |             |                  |                  |                | 0.23         |                     |                   | 7.14            |                  |
| 1073          | 8/4/2011    | Kitchen Sink               | Valley               | Yes                                                  | 3.13                            | 1.6         |                 |             |             |                  |                  |                | 4600         |                     |                   | 8.14            |                  |
| 1074          | 8/4/2011    | Spigot In Warehouse        | Upland               |                                                      | 3.82                            | < .025      |                 |             |             |                  |                  |                | 0.12         |                     |                   | 7.62            |                  |
| 1075          | 8/4/2011    | Kitchen Sink               | Upland               |                                                      | 14.32                           | < .025      |                 |             |             |                  |                  |                | 0.18         |                     |                   | 6.01            |                  |
| 1076          | 8/4/2011    | Kitchen Sink               | Upland               |                                                      | 8.45                            | < .025      |                 |             |             |                  |                  |                | 0.12         |                     |                   | 6.69            |                  |
| 1077          | 8/4/2011    | Kitchen Sink               | Valley               |                                                      | 6.53                            | < .025      |                 |             |             |                  |                  |                | 0.1          |                     |                   | 7.1             |                  |

Table S.8. Groundwater Quality Data for 1701 "Pre-Drill" Water Well Samples from Susquehanna County, Pennsylvania

| Water Well ID | Sample Date | Sampling Port                            | Topographic Location | Gas Extraction Area (Within 1 km of Active Gas Well) | Dissolved Oxygen - Field (mg/L) | Ethane ug/L | Hardness (mg/L) | Iron (mg/L) | Lead (mg/L) | Magnesium (mg/L) | Manganese (mg/L) | Mercury (mg/L) | Methane ug/L | Nitrate as N (mg/L) | Oil Grease (mg/L) | pH - Field (SU) | Potassium (mg/L) |
|---------------|-------------|------------------------------------------|----------------------|------------------------------------------------------|---------------------------------|-------------|-----------------|-------------|-------------|------------------|------------------|----------------|--------------|---------------------|-------------------|-----------------|------------------|
| 1078          | 1/10/2010   | Little Farm House Basement Pressure Tank | Upland               |                                                      | 9.24                            | < .025      |                 | < .05       |             | 6.27             | < .025           |                | 0.45         |                     |                   | 6.44            |                  |
| 1079          | 8/4/2011    | Kitchen Sink                             | Upland               |                                                      | 14.86                           | < .025      |                 |             |             |                  |                  |                | 0.34         |                     |                   | 7.37            |                  |
| 1080          | 8/4/2011    | Spigot On Side Of House                  | Valley               |                                                      | 4.73                            | < .025      |                 |             |             |                  |                  |                | 0.21         |                     |                   | 7.77            |                  |
| 1081          | 8/4/2011    | Kitchen Sink                             | Upland               |                                                      | 6.41                            | < .025      |                 |             |             |                  |                  |                | 0.17         |                     |                   | 7.82            |                  |
| 1082          | 8/4/2011    | Kitchen Sink                             | Valley               |                                                      | 7.69                            | < .025      |                 |             |             |                  |                  |                | 0.28         |                     |                   | 7.5             |                  |
| 1083          | 7/11/2011   | Outside Hose Bib                         | Upland               | Yes                                                  |                                 | <26         | 68              | 0.11        | <0.001      | 2.6              | 0.0022           | <0.0002        | <26          | 3.3                 | <4.7              |                 | 1.4              |
| 1084          | 7/11/2011   | Basement At Pressure Tank                | Upland               | Yes                                                  | 4.84                            | < 26        | 26              | < .05       | < .001      | 1.1              | 0.0076           | < .0002        | < 26         | 0.9                 |                   | 8.93            | 1.2              |
| 1085          | 12/21/2009  |                                          | Valley               | Yes                                                  |                                 | < .025      |                 | < .05       |             | 1.91             | < .025           |                | 20           |                     |                   |                 |                  |
| 1086          | 7/11/2011   | Bathroom Sink First Floor                | Valley               | Yes                                                  | 6.32                            | < 26        | 82              | < .05       | 0.0029      | 3.4              | 0.0026           | < .0002        | < 26         | 0.84                | < 4.7             | 7.62            | 0.72             |
| 1087          | 7/12/2011   | Outside Hose Bib                         | Upland               | Yes                                                  | 0.17                            | < 26        | 84              | < .05       | < .001      | 4.3              | 0.0081           | < .0002        | < 26         | < .05               | < 4.7             | 7.51            | 0.86             |
| 1088          | 7/12/2011   | Kitchen Sink                             | Valley               | Yes                                                  | 1.74                            | < 26        | 110             | < .05       | < .001      | 7.3              | 0.0014           | < .0002        | < 26         | 0.36                | < 4.7             | 7.67            | 1.1              |
| 1089          | 7/12/2011   | Pressure Tank                            | Valley               | Yes                                                  | 0.21                            | < 26        | 92              | 0.78        | < .001      | 6.1              | 0.035            | < .0002        | < 26         | < .05               | < 4.7             | 7.98            | 1                |
| 1090          | 12/21/2009  | Pressure Tank                            | Valley               | Yes                                                  | 1.5                             | 5.2         |                 | 0.164       |             | 16.4             | 0.314            |                | 22000        |                     |                   | 7.83            |                  |
| 1091          | 7/13/2011   | Pressure Tank In Basement                | Upland               |                                                      | 7.42                            | < 26        | 120             | 0.099       | 0.0011      | 5.6              | 0.046            | < .0002        | < 26         | < .05               |                   | 7.96            | 2                |
| 1092          | 7/13/2011   | Well                                     | Valley               |                                                      | 6.04                            | < 26        | 100             | < .05       | < .001      | 4.7              | 0.0014           | < .0002        | < 26         | < .05               |                   | 7.89            | 0.97             |
| 1093          | 7/13/2011   | Outside Hose Bib                         | Upland               | Yes                                                  | 4.41                            | < 26        | 84              | 0.16        | 0.0014      | 3.4              | 0.013            | < .0002        | < 26         | 1.5                 | < 4.7             | 7.1             | 0.84             |
| 1094          | 12/14/2009  | Pressure Tank In Basement                | Valley               | Yes                                                  |                                 |             |                 | 0.688       |             | 7.58             | 0.118            |                | 4.3          |                     |                   |                 |                  |
| 1095          | 7/13/2011   | Well                                     | Valley               | Yes                                                  | 2.86                            | < 26        | 96              | 0.058       | < .001      | 4.9              | 0.0011           | < .0002        | < 26         | < .05               | < 4.7             | 6.82            | 0.88             |
| 1096          | 7/13/2011   | Pressure Tank                            | Valley               | Yes                                                  | 7.7                             | < 26        | 54              | 0.2         | 0.0042      | 2.1              | 0.0082           | < .0002        | < 26         | 1.6                 |                   | 6.96            | 0.61             |
| 1097          | 1/3/2010    | Spigot Under House                       | Upland               | Yes                                                  | 7.16                            | < .025      |                 | < .05       |             | 3.99             | < .025           |                | 6.5          |                     |                   | 6.95            |                  |
| 1098          | 12/17/2009  | Pressure Tank                            | Upland               |                                                      | 10.09                           |             |                 | < .05       |             | 9.07             | < .025           |                | 7            |                     |                   | 7.43            |                  |

Table S.8. Groundwater Quality Data for 1701 "Pre-Drill" Water Well Samples from Susquehanna County, Pennsylvania

| Water Well ID | Sample Date | Sampling Port                            | Topographic Location | Gas Extraction Area (Within 1 km of Active Gas Well) | Dissolved Oxygen - Field (mg/L) | Ethane ug/L | Hardness (mg/L) | Iron (mg/L) | Lead (mg/L) | Magnesium (mg/L) | Manganese (mg/L) | Mercury (mg/L) | Methane ug/L | Nitrate as N (mg/L) | Oil Grease (mg/L) | pH - Field (SU) | Potassium (mg/L) |
|---------------|-------------|------------------------------------------|----------------------|------------------------------------------------------|---------------------------------|-------------|-----------------|-------------|-------------|------------------|------------------|----------------|--------------|---------------------|-------------------|-----------------|------------------|
| 1099          | 1/5/2010    | Kitchen Sink                             | Valley               | Yes                                                  | 6.75                            | 4.6         |                 | 0.094       |             | 13.5             | 0.068            |                | 23000        |                     |                   | 7.51            |                  |
| 1100          | 7/18/2011   | Outside Faucet                           | Valley               | Yes                                                  |                                 | < 26        | 57              | < .05       | < .001      | 2.3              | 0.002            | < .0002        | < 26         | 5.7                 | < 4.7             |                 | 1.7              |
| 1101          | 12/13/2009  |                                          | Upland               |                                                      |                                 |             |                 | 0.082       |             | 4.66             | < .025           |                | 0.13         |                     |                   |                 |                  |
| 1102          | 7/19/2011   | Inside Faucet                            | Valley               | Yes                                                  | 1.64                            | < 26        | 110             | 0.22        | 0.0012      | 5.1              | 0.0076           | < .0002        | < 26         | < .05               | < 4.7             | 7.62            | 1.1              |
| 1103          | 7/20/2011   | Kitchen Sink Cold Water Tap              | Upland               |                                                      | 8.19                            | < 26        | 40              | < .05       | < .001      | 2.1              | < .0005          | < .0002        | < 26         | 0.33                |                   | 6.71            | 0.69             |
| 1104          | 7/20/2011   | Pressure Tank                            | Upland               |                                                      | 3.8                             | < 26        | 120             | < .05       | < .001      | 5.6              | < .0005          | < .0002        | < 26         | 0.55                |                   | 7.08            | 1.4              |
| 1105          | 12/28/2009  | Pressure Tank                            | Upland               |                                                      | 2.27                            |             |                 | < .05       |             | 5.55             | 0.063            |                | 3.8          |                     |                   | 7.57            |                  |
| 1106          | 7/20/2011   | Frost Free Hydrant 2 Feet From Well Head | Upland               |                                                      | 5.5                             | < 26        | 83              | < .05       | < .001      | 4.1              | 0.0012           | < .0002        | < 26         | 0.082               |                   | 7.76            | 1.4              |
| 1107          | 7/20/2011   | Inside Faucet                            | Upland               |                                                      | 3.19                            | < 26        | 100             | < .05       | < .001      | 4.7              | 0.0031           | < .0002        | < 26         | 0.4                 |                   | 7.85            | 1.1              |
| 1108          | 12/13/2009  | Pressure Tank                            | Upland               |                                                      |                                 |             |                 | 0.071       |             | 4.04             | < .025           |                | 7.5          |                     |                   |                 |                  |
| 1109          | 12/28/2009  | Pressure Tank                            | Upland               |                                                      | 11.98                           | 4.9         |                 | < .05       |             | < 1              | < .025           |                | 2000         |                     |                   | 9.83            |                  |
| 1110          | 7/26/2011   | Pressure Tank In Gun Shop                | Valley               |                                                      | 1.85                            | < 26        | 58              | < .05       | < .001      | 5.2              | 0.059            | < .0002        | 1370         | < .05               | < 5.2             | 8.03            | 1.5              |
| 1111          | 12/16/2009  | Kitchen Sink                             | Valley               | Yes                                                  | 8.82                            | < .025      |                 | < .05       |             | 2.1              | < .025           |                | < .1         |                     |                   | 6.47            |                  |
| 1112          | 7/26/2011   | Inside Faucet                            | Valley               |                                                      | 2.21                            | < 26        | 72              | < .05       | < .001      | 4.2              | 0.012            | < .0002        | < 26         | 0.12                |                   | 8.02            | 1.8              |
| 1113          | 7/27/2011   | Outside Spigot Near Large Rock Slabs     | Valley               |                                                      | 1.84                            | < 26        | 43              | < .05       | < .001      | 3.9              | 0.019            | < .0002        | 213          | < .05               | < 5.6             | 8.35            | 1.8              |
| 1114          | 12/13/2009  | Pressure Tank                            | Upland               | Yes                                                  | 13.14                           | < .025      |                 | < .05       |             | 5.26             | < .025           |                | 0.31         |                     |                   | 7.75            |                  |
| 1115          | 7/27/2011   | Outside Faucet                           | Upland               |                                                      | 8.15                            | < 26        | 96              | 0.076       | < .001      | 4.2              | 0.0019           | < .0002        | < 26         | 1.1                 |                   | 7.41            | 1                |
| 1116          | 7/27/2011   | Kitchen Sink Cold Water Tap              | Valley               | Yes                                                  | 4.56                            | < 26        | 140             | 0.19        | < .001      | 7.4              | 0.016            | < .0002        | < 26         | 0.068               |                   | 7.63            | 1.1              |
| 1117          | 1/11/2010   | Pressure Tank                            | Upland               |                                                      | 5                               |             |                 | < .05       |             | 3.43             | 0.034            |                | 140          |                     |                   | 8.03            |                  |
| 1118          | 7/27/2011   | Kitchen Sink Faucet                      | Upland               |                                                      | 8.23                            | < 26        | 62              | < .05       | < .001      | 2.5              | 0.001            | < .0002        | < 26         | 1.6                 |                   | 7.33            | 0.81             |
| 1119          | 7/27/2011   | Outside Hose Bib                         | Upland               |                                                      | 2.73                            | < 26        | 110             | < .05       | < .001      | 4.8              | 0.0011           | < .0002        | < 26         | 0.78                |                   | 7.59            | 1.1              |
| 1120          | 7/28/2011   | Kitchen Sink                             | Valley               |                                                      | 0.77                            | < 26        | 97              | 0.085       | < .001      | 6.7              | 0.26             | < .0002        | < 26         | 0.36                |                   | 7.61            | 1.1              |

Table S.8. Groundwater Quality Data for 1701 "Pre-Drill" Water Well Samples from Susquehanna County, Pennsylvania

| Water Well ID | Sample Date | Sampling Port                  | Topographic Location | Gas Extraction Area (Within 1 km of Active Gas Well) | Dissolved Oxygen - Field (mg/L) | Ethane ug/L | Hardness (mg/L) | Iron (mg/L) | Lead (mg/L) | Magnesium (mg/L) | Manganese (mg/L) | Mercury (mg/L) | Methane ug/L | Nitrate as N (mg/L) | Oil Grease (mg/L) | pH - Field (SU) | Potassium (mg/L) |
|---------------|-------------|--------------------------------|----------------------|------------------------------------------------------|---------------------------------|-------------|-----------------|-------------|-------------|------------------|------------------|----------------|--------------|---------------------|-------------------|-----------------|------------------|
| 1121          | 7/28/2011   | Inside Faucet                  | Valley               |                                                      | 5.6                             | < 26        | 89              | 0.27        | < .001      | 8.7              | 0.0048           | < .0002        | < 26         | 0.55                | < 4.9             | 7.67            | 1.5              |
| 1122          | 7/28/2011   | Outside Faucet                 | Valley               |                                                      | 2.8                             | < 26        | 99              | 0.13        | 0.0011      | 9.2              | 0.063            | < .0002        | < 26         | < .05               | < 5               | 6.77            | 1.2              |
| 1123          | 7/29/2011   | Pressure Tank                  | Upland               | Yes                                                  | 5.1                             | < 26        | 85              | < .05       | 0.0016      | 5.7              | 0.0012           | < .0002        | < 26         | 2.7                 |                   | 6.17            | 1.3              |
| 1124          | 7/29/2011   | Kitchen Sink                   | Valley               |                                                      | 8.1                             | < 26        | 26              | 0.087       | < .001      | 2.5              | 0.0012           | < .0002        | < 26         | 0.22                |                   | 6.32            | 0.61             |
| 1125          | 7/29/2011   | Pressure Tank                  | Valley               |                                                      | 3.79                            | < 26        | 78              | 3.1         | 0.0025      | 7.5              | 0.02             | < .0002        | < 26         | 0.11                | < 4.8             | 7.68            | 0.78             |
| 1126          | 8/1/2011    | Outside Faucet                 | Upland               |                                                      | 7.74                            | < 26        | 91              | < .05       | < .001      | 8.8              | 0.0038           | < .0002        | < 26         | 0.56                | < 4.8             | 5.9             | 1.5              |
| 1127          | 8/1/2011    | Outside Faucet                 | Valley               |                                                      | 7.74                            | < 26        | 30              | < .05       | < .001      | 2                | 0.0059           | < .0002        | < 26         | 0.2                 | < 4.7             | 5.9             | 0.77             |
| 1128          | 8/1/2011    | Pressure Tank At Basement      | Upland               | Yes                                                  | 9.03                            | < 26        | 120             | 0.093       | 0.001       | 5.2              | 0.0017           | < .0002        | < 26         | 0.33                |                   | 7.44            | 1.3              |
| 1129          | 8/2/2011    |                                | Upland               | Yes                                                  |                                 | <26         | 110             | 1.3         | <0.001      | 5.3              | 0.013            | <0.0002        | <26          | 1.7                 | <4.7              |                 | 0.77             |
| 1130          | 12/28/2009  | Kitchen Sink                   | Valley               |                                                      | 7.62                            | < .025      |                 | < .05       |             | 2.96             | < .025           |                | 0.51         |                     |                   | 7.01            |                  |
| 1131          | 8/3/2011    | Kitchen Sink                   | Upland               | Yes                                                  |                                 | <26         | 120             | 0.15        | <.001       | 4.6              | 0.0068           | <.0002         | 30.9         | 9.4                 |                   |                 | 1.6              |
| 1132          | 8/3/2011    | Pressure Tank                  | Valley               |                                                      | 0.11                            | 48.2        | 60              | 0.82        | < .001      | 5                | 0.14             | < .0002        | 20500        | < .05               |                   | 8.06            | 0.82             |
| 1133          | 10/22/2009  |                                | Upland               | Yes                                                  |                                 |             |                 | < .05       |             | 7.99             | < .025           |                | 7.1          |                     |                   |                 |                  |
| 1134          | 12/28/2009  | Garage Sink                    | Upland               |                                                      | 94.5                            | < .025      |                 | < .05       |             | 6.74             | < .025           |                | 0.3          |                     |                   | 7.1             |                  |
| 1135          | 8/4/2011    | Bathroom Sink Cwt On South End | Upland               |                                                      | 2.95                            | < 26        | 71              | 0.14        | < .001      | 5.1              | 0.0085           | < .0002        | < 26         | 0.52                |                   | 7.66            | 0.82             |
| 1136          | 8/4/2011    | Bailed Well                    | Upland               | Yes                                                  | 2.46                            | < 26        | 76              | 0.16        | < .001      | 4.3              | 1.4              | < .0002        | < 26         | < .05               |                   | 6.55            | 6.6              |
| 1137          | 8/4/2011    | Kitchen Sink                   | Upland               | Yes                                                  | 6.76                            | < 26        | 110             | 0.24        | 0.0049      | 4.1              | 0.032            | < .0002        | < 26         | 0.51                | < 4.7             | 7.64            | 1.7              |
| 1138          | 8/4/2011    | Pressure Tank                  | Valley               | Yes                                                  | 2.02                            | < 26        | 160             | 0.14        | 0.0011      | 12               | 0.004            | < .0002        | < 26         | 0.38                |                   | 7.48            | 1.1              |
| 1139          | 5/19/2011   |                                | Valley               |                                                      |                                 | <26         | 67              | <0.05       | <0.001      | 7.2              | 0.097            | <0.0002        | 110          | <0.05               |                   |                 | 1.1              |
| 1140          | 7/25/2011   | Kitchen Sink                   | Valley               |                                                      | 1.99                            | < 26        | 100             | < .05       | 0.0027      | 9.2              | 0.13             | < .0002        | < 26         | < .05               | < 5.1             | 7.88            | 1.3              |
| 1141          | 7/27/2011   | Outside Spigot Under Back Deck | Valley               |                                                      | 1.54                            | < 26        | 79              | 0.78        | < .001      | 7.6              | 0.071            | < .0002        | 160          | < .05               | < 4.7             | 7.84            | 0.89             |
| 1142          | 8/2/2011    | Pressure Tank                  | Valley               |                                                      | 7.75                            | < 26        | 77              | 0.084       | < .001      | 7.6              | 0.0028           | < .0002        | < 26         | 0.34                | < 4.8             | 7.29            | 0.94             |

Table S.8. Groundwater Quality Data for 1701 "Pre-Drill" Water Well Samples from Susquehanna County, Pennsylvania

| Water Well ID | Sample Date | Sampling Port             | Topographic Location | Gas Extraction Area (Within 1 km of Active Gas Well) | Dissolved Oxygen - Field (mg/L) | Ethane ug/L | Hardness (mg/L) | Iron (mg/L) | Lead (mg/L) | Magnesium (mg/L) | Manganese (mg/L) | Mercury (mg/L) | Methane ug/L | Nitrate as N (mg/L) | Oil Grease (mg/L) | pH - Field (SU) | Potassium (mg/L) |
|---------------|-------------|---------------------------|----------------------|------------------------------------------------------|---------------------------------|-------------|-----------------|-------------|-------------|------------------|------------------|----------------|--------------|---------------------|-------------------|-----------------|------------------|
| 1143          | 8/2/2011    | Outside Faucet            | Upland               |                                                      | 5.7                             | < 26        | 69              | < .05       | < .001      | 6.3              | < .0005          | < .0002        | < 26         | 0.83                |                   | 6.62            | 0.89             |
| 1144          | 1/3/2010    | Kitchen Sink              | Upland               | Yes                                                  | 9.27                            | < .025      |                 | < .05       |             | 3.43             | < .025           |                | 3.2          |                     |                   | 7.02            |                  |
| 1145          | 12/13/2009  |                           | Upland               | Yes                                                  |                                 |             |                 | 0.082       |             | 6.76             | < .025           |                | 2.7          |                     |                   |                 |                  |
| 1146          | 1/10/2010   | Spring House              | Upland               |                                                      | 11.66                           | < .025      |                 | < .05       |             | 6.97             | < .025           |                | 0.7          |                     |                   | 7.93            |                  |
| 1147          | 1/5/2010    | Pressure Tank             | Upland               |                                                      | 12.1                            | < .025      |                 | 0.084       |             | 1.5              | < .025           |                | 1.1          |                     |                   | 8.43            |                  |
| 1148          | 5/10/2011   | Kitchen Sink              | Valley               |                                                      | 9.05                            | 0.028       | 23.57168        | < .05       | 0.013       | < 1              | < .0025          | < .0002        | 21           | < 1                 | < 5               | 8.24            | 2.95             |
| 1149          | 2/1/2010    | Pressure Tank             | Upland               |                                                      | 9.08                            | < .025      |                 | < .05       |             | 2.48             | < .025           |                | 0.11         |                     |                   | 6.57            |                  |
| 1150          | 8/20/2009   |                           | Valley               |                                                      |                                 |             |                 | 0.463       |             | < 1              | 0.03             |                | 23000        |                     | < 5               |                 |                  |
| 1151          | 12/6/2009   | Washroom Sink             | Valley               |                                                      | 166.9                           | < .025      |                 | < .05       |             | 3.14             | < .025           |                | 0.87         |                     |                   | 6.27            |                  |
| 1152          | 1/17/2010   | Kitchen Sink              | Valley               |                                                      | 4.62                            |             |                 | < .05       |             | 14               | < .025           |                | 0.43         |                     |                   | 7.79            |                  |
| 1153          | 1/14/2010   | Basement At Pressure Tank | Upland               |                                                      | 9.62                            | < .025      |                 | < .05       |             | 8.28             | < .025           |                | 2            |                     |                   | 7.95            |                  |
| 1154          | 1/17/2010   | Kitchen Sink              | Upland               |                                                      | 5.5                             |             |                 | < .05       |             | 8.58             | < .025           |                | 0.35         |                     |                   | 7.56            |                  |
| 1155          | 1/17/2010   | Pressure Tank             | Valley               |                                                      | 9.75                            | < .025      |                 | < .05       |             | 2.87             | < .025           |                | 0.21         |                     |                   | 6.52            |                  |
| 1156          | 12/11/2010  | Kitchen Sink              | Valley               |                                                      | 9.85                            | 0.038       | 35.3174         | <0.05       | 0.032       | 1.3              | <0.0025          | <0.0002        | 0.28         | <1                  | <5                | 6.46            | <1               |
| 1157          | 8/4/2011    | Spigot Back Yard          | Upland               |                                                      | 6.5                             | 2.4         |                 |             |             |                  |                  |                | 11000        |                     |                   | 7.29            |                  |
| 1158          | 8/4/2011    | Kitchen Sink              | Valley               |                                                      | 4.25                            | 2.6         |                 |             |             |                  |                  |                | 12000        |                     |                   | 6.54            |                  |
| 1159          | 8/4/2011    | Pressure Tank             | Valley               |                                                      | 5.74                            | <0.025      |                 |             |             |                  |                  |                | 22           |                     |                   | 6.51            |                  |
| 1160          | 8/10/2011   |                           | Upland               |                                                      |                                 | 3.3         | 134.0594        | < .05       | 0.0063      | 8.3              | 0.046            | < .0002        | 5100         | < 1                 | < 5               |                 | 3.2              |
| 1161          | 8/10/2011   | Kitchen Sink              | Valley               |                                                      | 7.29                            | < .025      |                 |             |             |                  |                  |                | 1.5          |                     |                   | 7.93            |                  |
| 1162          | 8/10/2011   | Kitchen Sink              | Upland               |                                                      | 7.92                            | < .025      |                 |             |             |                  |                  |                | < .1         |                     |                   | 7.34            |                  |
| 1163          | 8/10/2011   | Spigot On Side Of House   | Upland               |                                                      |                                 | <0.025      |                 |             |             |                  |                  |                | 0.14         |                     |                   |                 |                  |
| 1164          | 8/10/2011   | Outside Spigot            | Valley               |                                                      | 1.37                            | < .025      |                 |             |             |                  |                  |                | 5.2          |                     |                   | 7.85            |                  |
| 1165          | 8/10/2011   | Kitchen Sink              | Valley               |                                                      | 1.28                            | 7.3         |                 |             |             |                  |                  |                | 22000        |                     |                   | 8.05            |                  |

Table S.8. Groundwater Quality Data for 1701 "Pre-Drill" Water Well Samples from Susquehanna County, Pennsylvania

| Water Well ID | Sample Date | Sampling Port             | Topographic Location | Gas Extraction Area (Within 1 km of Active Gas Well) | Dissolved Oxygen - Field (mg/L) | Ethane ug/L | Hardness (mg/L) | Iron (mg/L) | Lead (mg/L) | Magnesium (mg/L) | Manganese (mg/L) | Mercury (mg/L) | Methane ug/L | Nitrate as N (mg/L) | Oil Grease (mg/L) | pH - Field (SU) | Potassium (mg/L) |
|---------------|-------------|---------------------------|----------------------|------------------------------------------------------|---------------------------------|-------------|-----------------|-------------|-------------|------------------|------------------|----------------|--------------|---------------------|-------------------|-----------------|------------------|
| 1166          | 8/10/2011   | Spigot On Side Of Shed    | Valley               |                                                      | 0.71                            | < .025      |                 |             |             |                  |                  |                | 0.12         |                     |                   | 7.85            |                  |
| 1167          | 8/10/2011   | Outside Spigot            | Upland               |                                                      | 5.61                            | <0.025      |                 |             |             |                  |                  |                | 0.34         |                     |                   | 6.18            |                  |
| 1168          | 8/10/2011   | Kitchen Sink              | Upland               |                                                      | 5.38                            | < .025      |                 |             |             |                  |                  |                | 0.19         |                     |                   | 6.05            |                  |
| 1169          | 8/10/2011   | Outside Spigot            | Upland               |                                                      | 8.61                            | < .025      |                 |             |             |                  |                  |                | 8            |                     |                   | 7.84            |                  |
| 1170          | 8/10/2011   | Kitchen Sink              | Upland               |                                                      | 4.57                            | < .025      |                 |             |             |                  |                  |                | < .1         |                     |                   | 7.92            |                  |
| 1171          | 8/10/2011   | Dug Well                  | Upland               |                                                      |                                 | < .025      |                 |             |             |                  |                  |                | 3.4          |                     |                   |                 |                  |
| 1172          | 8/10/2011   | Shop Sink                 | Upland               |                                                      | 8.71                            | < .025      |                 |             |             |                  |                  |                | 0.14         |                     |                   | 7.23            |                  |
| 1173          | 12/10/2009  | Kitchen Sink              | Valley               | Yes                                                  |                                 |             |                 | 0.451       |             | 7.13             | 0.052            |                | 15           |                     |                   |                 |                  |
| 1174          | 8/11/2011   | Kitchen Sink              | Upland               |                                                      | 7.82                            | < .025      |                 |             |             |                  |                  |                | 0.29         |                     |                   | 7.55            |                  |
| 1175          | 8/11/2011   | Kitchen Sink              | Upland               |                                                      | 7.91                            | < .025      |                 |             |             |                  |                  |                | 0.18         |                     |                   | 7.51            |                  |
| 1176          | 8/11/2011   | Outside Spigot            | Valley               |                                                      | 8.21                            | 0.046       |                 |             |             |                  |                  |                | 300          |                     |                   | 8.39            |                  |
| 1177          | 8/11/2011   | Kitchen Sink              | Upland               |                                                      | 7.12                            | < .025      |                 |             |             |                  |                  |                | 0.32         |                     |                   | 7.14            |                  |
| 1178          | 8/14/2011   | Outside Spigot            | Valley               |                                                      | 6.95                            | < .025      |                 |             |             |                  |                  |                | 0.15         |                     |                   | 8.05            |                  |
| 1179          | 8/15/2011   | Hand Dug Well             | Upland               |                                                      | 8.71                            | < .025      |                 |             |             |                  |                  |                | 2            |                     |                   | 6.49            |                  |
| 1180          | 8/16/2011   | Kitchen Sink              | Upland               |                                                      | 4.32                            | < .025      |                 |             |             |                  |                  |                | 0.41         |                     |                   | 6.5             |                  |
| 1181          | 1/14/2010   | Basement Pressure Tank    | Valley               |                                                      | 9.19                            | < .025      |                 | < .05       |             | 1.75             | < .025           |                | < .1         |                     |                   | 6.66            |                  |
| 1182          | 8/16/2011   | Dug Well                  | Upland               |                                                      | 5.55                            | < .025      |                 |             |             |                  |                  |                | 6.6          |                     |                   | 6.34            |                  |
| 1183          | 8/16/2011   | Kitchen Sink              | Valley               |                                                      | 7.88                            | < .025      |                 |             |             |                  |                  |                | 0.11         |                     |                   | 7.67            |                  |
| 1184          | 2/1/2010    | Elementary Boiler Room    | Upland               | Yes                                                  | 7.42                            | < .025      |                 | < .05       |             | 9.4              | < .025           |                | 8.8          |                     |                   | 7.92            |                  |
| 1185          | 8/17/2011   | Kitchen Sink              | Valley               |                                                      | 7.8                             | < .025      |                 |             |             |                  |                  |                | 0.15         |                     |                   | 7.71            |                  |
| 1186          | 8/19/2011   | Kitchen Sink              | Upland               |                                                      | 5                               | < .025      |                 |             |             |                  |                  |                | 0.72         |                     |                   | 7.45            |                  |
| 1187          | 8/19/2011   | Kitchen Sink              | Valley               |                                                      | 5.88                            | < .025      |                 |             |             |                  |                  |                | 0.24         |                     |                   | 6.07            |                  |
| 1188          | 8/29/2011   | Outside Faucet            | Valley               |                                                      | 2.39                            | < 26        | 110             | < .05       | < .001      | 4.5              | < .0005          | < .0002        | < 26         | 0.269               | < 4.81            | 7.83            | 1.4              |
| 1189          | 1/14/2010   | Basement At Pressure Tank | Valley               |                                                      | 5.08                            | < .025      |                 | 0.189       |             | 7.88             | < .025           |                | 0.29         |                     |                   | 7.71            |                  |
| 1190          | 9/1/2011    | Outside Faucet            | Upland               |                                                      | 0.64                            | < 5         |                 |             |             |                  |                  |                | < 5          |                     |                   | 7.96            |                  |
| 1191          | 9/1/2011    | Hydrant                   | Upland               |                                                      | 7.31                            | < 5         |                 |             |             |                  |                  |                | < 5          |                     |                   | 6.75            |                  |

Table S.8. Groundwater Quality Data for 1701 "Pre-Drill" Water Well Samples from Susquehanna County, Pennsylvania

| Water Well ID | Sample Date | Sampling Port             | Topographic Location | Gas Extraction Area (Within 1 km of Active Gas Well) | Dissolved Oxygen - Field (mg/L) | Ethane ug/L | Hardness (mg/L) | Iron (mg/L) | Lead (mg/L) | Magnesium (mg/L) | Manganese (mg/L) | Mercury (mg/L) | Methane ug/L | Nitrate as N (mg/L) | Oil Grease (mg/L) | pH - Field (SU) | Potassium (mg/L) |
|---------------|-------------|---------------------------|----------------------|------------------------------------------------------|---------------------------------|-------------|-----------------|-------------|-------------|------------------|------------------|----------------|--------------|---------------------|-------------------|-----------------|------------------|
| 1192          | 8/2/2011    | Pressure Tank             | Upland               | Yes                                                  | 0.13                            | < 26        | 1.5             | 0.24        | 0.0012      | < .1             | 0.0086           | < .0002        | 52.1         | < .05               |                   | 9.85            | 0.68             |
| 1193          | 1/17/2010   | Garage Sink               | Upland               |                                                      | 5.95                            | < .025      |                 | < .05       |             | 8.4              | < .025           |                | 0.19         |                     |                   | 7.71            |                  |
| 1194          | 8/10/2011   | Outside Faucet            | Valley               | Yes                                                  | 5.77                            | < 26        | 110             | 1           | < .001      | 4.9              | 4.2              | < .0002        | < 26         | < .05               |                   | 7.48            | 1.3              |
| 1195          | 8/10/2011   | Inside Faucet             | Upland               | Yes                                                  | 1.69                            | < 26        | 82              | 0.092       | < .001      | 3.7              | 0.058            | < .0002        | 372          | < .05               |                   | 7.76            | 2.2              |
| 1196          | 1/13/2010   | Kitchen Sink              | Upland               |                                                      |                                 |             |                 | < .05       |             | 9.14             | < .025           |                | 0.84         |                     |                   |                 |                  |
| 1197          | 2/3/2010    | Sink In Milkhouse Barn    | Upland               | Yes                                                  | 3.47                            | < .025      |                 | 0.113       |             | 7.86             | < .025           |                | 0.26         |                     |                   | 7.34            |                  |
| 1198          | 8/15/2011   | Outside Faucet            | Upland               | Yes                                                  | 4.11                            | < 26        | 120             | < .05       | < .001      | 6.9              | 0.00062          | < .0002        | < 26         | 0.28                |                   | 7.39            | 1.3              |
| 1199          | 1/12/2010   | Pressure Tank             | Upland               |                                                      |                                 |             |                 | 0.098       |             | 3.74             | < .025           |                | 0.43         |                     |                   |                 |                  |
| 1200          | 1/18/2010   | Kitchen Sink              | Upland               |                                                      | 10.24                           | < .025      |                 | < .05       |             | 2.64             | < .025           |                | 0.12         |                     |                   | 6.57            |                  |
| 1201          | 8/22/2011   | Barn Spigot               | Upland               |                                                      | 5.17                            | < .025      |                 |             |             |                  |                  |                | 0.18         |                     |                   | 6.58            |                  |
| 1202          | 8/22/2011   | Kitchen Sink              | Valley               |                                                      | 4.75                            | < .025      |                 |             |             |                  |                  |                | 0.13         |                     |                   | 7.36            |                  |
| 1203          | 8/22/2011   | Kitchen Sink              | Upland               |                                                      | 5.31                            | < .025      |                 |             |             |                  |                  |                | 0.31         |                     |                   | 7.44            |                  |
| 1204          | 8/22/2011   | Kitchen Sink              | Valley               |                                                      | 7.59                            | < .025      |                 |             |             |                  |                  |                | 1.4          |                     |                   | 7.09            |                  |
| 1205          | 8/22/2011   | Kitchen Sink              | Upland               |                                                      | 5.36                            | < .025      |                 |             |             |                  |                  |                | < .1         |                     |                   | 7.82            |                  |
| 1206          | 8/23/2011   | Outside Spigot            | Valley               |                                                      | 5.73                            | < .025      |                 |             |             |                  |                  |                | 2            |                     |                   | 7.21            |                  |
| 1207          | 1/23/2010   | Basement At Pressure Tank | Upland               |                                                      | 6.97                            |             |                 | < .05       |             | 7.54             | < .025           |                | 0.28         |                     |                   | 7.8             |                  |
| 1208          | 1/13/2010   |                           | Valley               |                                                      |                                 |             |                 | < .05       |             | 3.57             | < .025           |                | 18000        |                     |                   |                 |                  |
| 1209          | 6/23/2011   | Kitchen Sink              | Valley               | Yes                                                  | 7.29                            | < 26        | 97              | < .05       | < .001      | 6.5              | 0.017            | < .0002        | < 26         | 0.13                |                   | 7.25            | 1.3              |
| 1210          | 1/13/2010   | Kitchen Sink              | Upland               |                                                      |                                 |             |                 | < .05       |             | 5.7              | < .025           |                | < .1         |                     |                   |                 |                  |
| 1211          | 8/5/2011    | Inside Faucet             | Upland               | Yes                                                  | 3.25                            | < 26        | 94              | < .05       | < .001      | 6.3              | 0.056            | < .0002        | < 26         | 0.69                |                   | 7.95            | 1.1              |
| 1212          | 8/12/2011   | Pressure Tank             | Valley               |                                                      |                                 | <26         | 92              | <0.05       | 0.0037      | 8.5              | 0.0033           | <0.0002        | <26          | <0.05               | <4.8              |                 | 1.1              |
| 1213          | 12/6/2009   | Kitchen Sink              | Upland               |                                                      | 4.97                            | < .025      |                 | < .05       |             | 10.6             | < .025           |                | 3.4          |                     |                   | 7.02            |                  |
| 1214          | 8/12/2011   | Inside Faucet             | Upland               |                                                      | 4.74                            | < 26        | 77              | 0.077       | 0.0015      | 3.1              | 0.028            | < .0002        | < 26         | 0.65                |                   | 7.47            | 1.1              |
| 1215          | 8/21/2011   | Outside Faucet            | Upland               |                                                      | 0.41                            | < 26        | 130             | 8.5         | 0.0038      | 7.4              | 2.8              | < .0002        | < 26         | 0.38                |                   | 7.79            | 2.2              |
| 1216          | 8/23/2011   | Inside Faucet             | Upland               |                                                      | 6.6                             | < 26        | 62              | < .05       | < .001      | 2.8              | < .0005          | < .0002        | < 26         | 0.16                |                   | 7.85            | 1.3              |

Table S.8. Groundwater Quality Data for 1701 "Pre-Drill" Water Well Samples from Susquehanna County, Pennsylvania

| Water Well ID | Sample Date | Sampling Port                  | Topographic Location | Gas Extraction Area (Within 1 km of Active Gas Well) | Dissolved Oxygen - Field (mg/L) | Ethane ug/L | Hardness (mg/L) | Iron (mg/L) | Lead (mg/L) | Magnesium (mg/L) | Manganese (mg/L) | Mercury (mg/L) | Methane ug/L | Nitrate as N (mg/L) | Oil Grease (mg/L) | pH - Field (SU) | Potassium (mg/L) |
|---------------|-------------|--------------------------------|----------------------|------------------------------------------------------|---------------------------------|-------------|-----------------|-------------|-------------|------------------|------------------|----------------|--------------|---------------------|-------------------|-----------------|------------------|
| 1217          | 8/23/2011   | Inside Faucet                  | Upland               | Yes                                                  | 4.12                            | < 26        | 53              | < .05       | < .001      | 2.2              | < .0005          | < .0002        | < 26         | 0.12                |                   | 7.45            | 2.2              |
| 1218          | 8/24/2011   | Pressure Tank                  | Upland               | Yes                                                  | 9.9                             | < 26        | 43              | 2           | 0.011       | 2.5              | 0.043            | < .0002        | < 26         | 0.59                |                   | 7.8             | 1.4              |
| 1219          | 8/24/2011   | Inside Faucet                  | Valley               |                                                      | 1.62                            | < 26        | 100             | 0.32        | < .001      | 5.2              | 0.0058           | < .0002        | < 26         | 0.19                |                   | 7.65            | 0.84             |
| 1220          | 1/18/2010   | Basement Pressure Tank         | Upland               |                                                      | 9.86                            | < .025      |                 | 0.301       |             | 6.74             | < .025           |                | 0.31         |                     |                   | 7.19            |                  |
| 1221          | 8/25/2011   | Inside Faucet                  | Upland               |                                                      | 3.37                            | < 5         | 96              | 0.12        | < .001      | 5.2              | 0.0056           | < .0002        | < 5          | 0.22                |                   | 6.96            | 1.1              |
| 1222          | 8/26/2011   | Well                           | Upland               | Yes                                                  |                                 | < 5         | 80              | 7.1         | 0.0042      | 4.4              | 4.2              | < .0002        | 227          | < .05               |                   |                 | 3.5              |
| 1223          | 8/29/2011   | Kitchen Sink                   | Upland               |                                                      | 3.98                            | < 5         | 130             | 0.07        | < .001      | 7.5              | 0.00084          | < .0002        | < 5          | 0.14                |                   | 7.36            | 1.9              |
| 1224          | 1/11/2010   | Kitchen Sink                   | Upland               |                                                      | 6.22                            | < .025      |                 | 0.411       |             | 7.97             | < .025           |                | 2.7          |                     |                   | 7.58            |                  |
| 1225          | 1/18/2010   | Pressure Tank In Basement      | Valley               | Yes                                                  | 3.21                            | < .025      |                 | < .05       |             | 3.55             | < .025           |                | 0.45         |                     |                   | 7.68            |                  |
| 1226          | 1/24/2010   | Pressure Tank                  | Upland               | Yes                                                  | 2                               | < .025      |                 | 0.171       |             | 7.56             | 0.109            |                | 1.5          |                     |                   | 7.7             |                  |
| 1227          | 8/30/2011   | Pressure Tank                  | Upland               |                                                      | 5.39                            | < 5         | 99              | 0.21        | 0.0015      | 5.4              | 0.041            | < .0002        | < 5          | 0.31                |                   | 7.64            | 1.3              |
| 1228          | 8/30/2011   | Outside Hose Bib               | Valley               |                                                      | 0.05                            | < 5         | 110             | < .05       | < .001      | 5.2              | 0.015            | < .0002        | 6.94         | 0.2                 |                   | 7.78            | 1.6              |
| 1229          | 8/10/2011   | Pressure Tank Before Treatment | Valley               |                                                      | 2.39                            | < 26        | 38              | 0.074       | < .001      | 2.1              | 0.012            | < .0002        | 13000        | < .05               |                   | 8.77            | 2                |
| 1230          | 1/10/2010   | Little House By Pond Spring    | Valley               |                                                      | 7.69                            | < .025      |                 | < .05       |             | 6.48             | < .025           |                | 0.28         |                     |                   | 6.67            |                  |
| 1231          | 1/10/2010   | Pressure Tank                  | Valley               |                                                      | 6.39                            | 0.48        |                 | 0.152       |             | 7.23             | 0.085            |                | 2600         |                     |                   | 8.18            |                  |
| 1232          | 1/16/2010   | Basement Pressure Tank         | Upland               |                                                      | 8.58                            | < .025      |                 | < .05       |             | 8.93             | < .025           |                | 1.2          |                     |                   | 7.58            |                  |
| 1233          | 7/19/2011   | Kitchen Sink                   | Upland               |                                                      | 6.83                            | < .025      |                 |             |             |                  |                  |                | 0.65         |                     |                   | 7.54            |                  |
| 1234          | 8/24/2011   | Kitchen Sink                   | Valley               |                                                      | 6.73                            | < .025      |                 |             |             |                  |                  |                | < .1         |                     |                   | 7.59            |                  |
| 1235          | 8/24/2011   | Inside Faucet                  | Valley               |                                                      | 8.62                            | < .025      |                 |             |             |                  |                  |                | < .1         |                     |                   | 7.93            |                  |
| 1236          | 1/16/2010   | Basement At Pressure Tank      | Upland               |                                                      | 9.15                            | < .025      |                 | < .05       |             | 5.79             | < .025           |                | 1            |                     |                   | 7.39            |                  |
| 1237          | 1/16/2010   | Basement Pressure Tank         | Upland               |                                                      | 6.57                            | < .025      |                 | < .05       |             | 9.03             | 0.025            |                | < .1         |                     |                   | 7.88            |                  |



Table S.8. Groundwater Quality Data for 1701 "Pre-Drill" Water Well Samples from Susquehanna County, Pennsylvania

| Water Well ID | Sample Date | Sampling Port                | Topographic Location | Gas Extraction Area (Within 1 km of Active Gas Well) | Dissolved Oxygen - Field (mg/L) | Ethane ug/L | Hardness (mg/L) | Iron (mg/L) | Lead (mg/L) | Magnesium (mg/L) | Manganese (mg/L) | Mercury (mg/L) | Methane ug/L | Nitrate as N (mg/L) | Oil Grease (mg/L) | pH - Field (SU) | Potassium (mg/L) |
|---------------|-------------|------------------------------|----------------------|------------------------------------------------------|---------------------------------|-------------|-----------------|-------------|-------------|------------------|------------------|----------------|--------------|---------------------|-------------------|-----------------|------------------|
| 1238          | 8/26/2011   | Kitchen Sink                 | Valley               |                                                      | 5.72                            | < .025      |                 |             |             |                  |                  |                | 46           |                     |                   | 8.89            |                  |
| 1239          | 8/27/2011   | Kitchen Sink                 | Upland               |                                                      | 5.56                            | < .025      |                 |             |             |                  |                  |                | 0.12         |                     |                   | 7.42            |                  |
| 1240          | 8/27/2011   | Kitchen Sink                 | Valley               |                                                      | 5.34                            | 0.23        |                 |             |             |                  |                  |                | 2000         |                     |                   | 7.92            |                  |
| 1241          | 1/21/2010   | Kitchen Sink                 | Upland               |                                                      | 7.16                            | < .25       |                 | < .05       |             | 6.09             | < .025           |                | 0.2          |                     |                   | 7.68            |                  |
| 1242          | 8/27/2011   | Kitchen Faucet               | Valley               |                                                      |                                 | 0.26        |                 |             |             |                  |                  |                | 2100         |                     |                   |                 |                  |
| 1243          | 1/23/2010   | Pressre Tank In Barn         | Upland               | Yes                                                  | 4.59                            |             |                 | < .05       |             | < 1              | < .025           |                | 130          |                     |                   | 8.81            |                  |
| 1244          | 9/1/2011    | Kitchen Sink                 | Valley               |                                                      | 4.8                             | < .025      |                 |             |             |                  |                  |                | 1.3          |                     |                   | 7.57            |                  |
| 1245          | 1/23/2010   | Basement At Pressure Tank    | Upland               | Yes                                                  | 5.52                            |             |                 | < .05       |             | 1.45             | < .025           |                | 50           |                     |                   | 7.85            |                  |
| 1246          | 9/1/2011    | Well In Field                | Upland               |                                                      | 3.32                            | < .025      |                 |             |             |                  |                  |                | 2            |                     |                   | 6.5             |                  |
| 1247          | 8/10/2011   | Kitchen Sink                 | Upland               |                                                      | 4.79                            | 0.41        |                 |             |             |                  |                  |                | 1700         |                     |                   | 7.89            |                  |
| 1248          | 8/10/2011   | Kitchen Sink                 | Upland               |                                                      | 4.46                            | 0.15        |                 |             |             |                  |                  |                | 390          |                     |                   | 9.28            |                  |
| 1249          | 8/11/2011   | Pressure Tank                | Valley               |                                                      | 8.6                             | 9.7         |                 |             |             |                  |                  |                | 16000        |                     |                   | 8.15            |                  |
| 1250          | 1/14/2010   | Basement At Pressure Tank    | Upland               |                                                      | 7.69                            | < .025      |                 | < .05       |             | 8.78             | < .025           |                | 0.29         |                     |                   | 7.6             |                  |
| 1251          | 2/3/2010    | Holding Tank                 | Upland               |                                                      | 9.88                            | < .025      |                 | < .05       |             | 2.6              | < .025           |                | < .1         |                     |                   | 6.06            |                  |
| 1252          | 8/18/2011   | Kitchen Sink                 | Valley               | Yes                                                  | 1.7                             | < 26        | 130             | < .05       | < .001      | 8.5              | 0.00065          | < .0002        | < 26         | 0.18                |                   | 7.78            | 1.2              |
| 1253          | 1/31/2010   | Basement At Pressure Tank    | Upland               |                                                      | 9.09                            | < .025      |                 | < .05       |             | 2.8              | < .025           |                | 0.11         |                     |                   | 6.85            |                  |
| 1254          | 1/24/2010   | Kitchen Sink                 | Upland               |                                                      | 5.53                            | < .025      |                 | < .05       |             | 5.61             | < .025           |                | 0.28         |                     |                   | 7.41            |                  |
| 1255          | 1/21/2010   | Pressure Tank                | Valley               | Yes                                                  | 6.29                            | 0.053       |                 | 0.245       |             | 3.19             | 0.075            |                | 250          |                     |                   | 8.36            |                  |
| 1256          | 2/12/2009   |                              | Upland               | Yes                                                  |                                 | 0.19        |                 | 0.072       |             | 5.16             | <0.01            |                | 0.24         |                     |                   |                 |                  |
| 1257          | 4/8/2009    |                              | Upland               |                                                      |                                 | <0.025      |                 | <0.025      |             | 6.58             | <0.025           |                | 0.55         |                     |                   |                 |                  |
| 1258          | 1/16/2010   | Basement Pressure Tank       | Upland               | Yes                                                  | 5.57                            | < .025      |                 | < .05       |             | 6.48             | < .025           |                | 0.29         |                     |                   | 7.78            |                  |
| 1259          | 1/24/2010   | Pressure Tank - Drilled Well | Valley               | Yes                                                  | 6.77                            |             |                 | < .05       |             | 2.88             | < .025           |                | 6.2          |                     |                   | 7.03            |                  |
| 1260          | 1/31/2010   | Crawl Space At Pressure Tank | Valley               |                                                      | 7.99                            | < .025      |                 | < .05       |             | 9                | 0.028            |                | 4.7          |                     |                   | 7.68            |                  |
| 1261          | 1/31/2010   | Pressure Tank                | Valley               |                                                      | 9.66                            | < .025      |                 | 0.433       |             | 2.8              | < .025           |                | 0.31         |                     |                   | 7.52            |                  |

Table S.8. Groundwater Quality Data for 1701 "Pre-Drill" Water Well Samples from Susquehanna County, Pennsylvania

| Water Well ID | Sample Date | Sampling Port                     | Topographic Location | Gas Extraction Area (Within 1 km of Active Gas Well) | Dissolved Oxygen - Field (mg/L) | Ethane ug/L | Hardness (mg/L) | Iron (mg/L) | Lead (mg/L) | Magnesium (mg/L) | Manganese (mg/L) | Mercury (mg/L) | Methane ug/L | Nitrate as N (mg/L) | Oil Grease (mg/L) | pH - Field (SU) | Potassium (mg/L) |
|---------------|-------------|-----------------------------------|----------------------|------------------------------------------------------|---------------------------------|-------------|-----------------|-------------|-------------|------------------|------------------|----------------|--------------|---------------------|-------------------|-----------------|------------------|
| 1262          | 1/24/2010   | Outside Spigot                    | Upland               |                                                      |                                 | < .025      |                 | < .05       |             | 5.51             | < .025           |                | < 1.7        |                     |                   |                 |                  |
| 1263          | 1/24/2010   | Kitchen Sink                      | Upland               |                                                      |                                 | < .025      |                 | < .05       |             | 5.51             | < .025           |                | 1.7          |                     |                   |                 |                  |
| 1264          | 1/23/2010   | Pressure Tank In Basement         | Valley               | Yes                                                  | 9.59                            | < .025      |                 | < .05       |             | 1.2              | < .025           |                | 0.27         |                     |                   | 6.48            |                  |
| 1265          | 1/18/2010   | Basement Pressure Tank            | Upland               |                                                      | 8.34                            | < .025      |                 | < .05       |             | 3.76             | < .025           |                | 0.38         |                     |                   | 7.35            |                  |
| 1266          | 1/10/2010   | Basement Pressure Tank            | Upland               |                                                      | 2.62                            | 0.089       |                 | 0.068       |             | < 1              | < .025           |                | 700          |                     |                   | 8.21            |                  |
| 1267          | 1/11/2010   | Pressure Tank                     | Upland               |                                                      | 9.32                            | < .025      |                 | < .05       |             | 3.64             | < .025           |                | 0.6          |                     |                   | 7.37            |                  |
| 1268          | 12/9/2009   | Basement At Pressure Tank         | Upland               | Yes                                                  |                                 | < .025      |                 | < .05       |             | 5.67             | < .025           |                | 0.13         |                     |                   |                 |                  |
| 1269          | 1/18/2010   | Pressure Tank                     | Upland               |                                                      | 4.71                            | < .025      |                 | < .05       |             | 8.08             | < .025           |                | 1.5          |                     |                   | 7.61            |                  |
| 1270          | 1/31/2010   |                                   | Upland               | Yes                                                  |                                 | < .025      |                 | < .05       |             | 6.32             | < .025           |                | 1.2          |                     |                   |                 |                  |
| 1271          | 8/7/2009    | Kitchen Sink                      | Valley               |                                                      |                                 |             |                 | < .025      |             | 2.99             | < .025           |                | 6.1          |                     | < 5               |                 |                  |
| 1272          | 1/12/2010   | Kitchen Sink At Ashley Sarnosky'S | Upland               |                                                      | 9.01                            | < .025      |                 | < .05       |             | 1.67             | < .025           |                | 0.18         |                     |                   | 6.73            |                  |
| 1273          | 2/21/2010   | Kitchen Sink                      | Upland               |                                                      | 7.14                            | < .025      |                 | < .05       |             | 7.01             | < .025           |                | 1.4          |                     |                   | 7.47            |                  |
| 1274          | 8/6/2009    |                                   | Upland               | Yes                                                  |                                 |             |                 | < .025      |             | 8.06             | < .025           |                | 0.8          |                     | < 5               |                 |                  |
| 1275          | 2/15/2010   | Pressure Tank                     | Upland               |                                                      | 3.65                            | < .025      |                 | 0.205       |             | 11.9             | 0.174            |                | 30           |                     |                   | 7.62            |                  |
| 1276          | 2/13/2010   | Basement At Pressure Tank         | Valley               |                                                      | 5.61                            |             |                 | 0.053       |             | 11.3             | 0.115            |                | 3            |                     |                   | 7.64            |                  |
| 1277          | 2/27/2010   | Basement At Spigot                | Valley               |                                                      | 8.03                            | < .025      |                 | < .05       |             | 4.48             | < .025           |                | 0.55         |                     |                   | 6.64            |                  |
| 1278          | 2/18/2010   | Pressure Tank                     | Upland               | Yes                                                  |                                 |             |                 | < .05       |             | 6.9              | < .025           |                | 0.15         |                     |                   |                 |                  |
| 1279          | 2/16/2010   | Kitchen Sink                      | Upland               |                                                      | 3.36                            | < .025      |                 | < .05       |             | 7.4              | < .025           |                | 3.2          |                     |                   | 7.74            |                  |
| 1280          | 2/18/2010   | Kitchen Sink                      | Upland               | Yes                                                  | 8.49                            | < .025      |                 | < .05       |             | 6.98             | < .025           |                | 0.13         |                     |                   | 7.02            |                  |
| 1281          | 2/18/2010   | Kitchen Sink                      | Upland               |                                                      | 7.27                            | < .025      |                 | < .05       |             | 7.88             | < .025           |                | 0.68         |                     |                   | 7.35            |                  |
| 1282          | 2/18/2010   | Kitchen Sink                      | Upland               |                                                      | 6.67                            | < .025      |                 | < .05       |             | 8.53             | < .025           |                | 0.12         |                     |                   | 7.21            |                  |

Table S.8. Groundwater Quality Data for 1701 "Pre-Drill" Water Well Samples from Susquehanna County, Pennsylvania

| Water Well ID | Sample Date | Sampling Port                          | Topographic Location | Gas Extraction Area (Within 1 km of Active Gas Well) | Dissolved Oxygen - Field (mg/L) | Ethane ug/L | Hardness (mg/L) | Iron (mg/L) | Lead (mg/L) | Magnesium (mg/L) | Manganese (mg/L) | Mercury (mg/L) | Methane ug/L | Nitrate as N (mg/L) | Oil Grease (mg/L) | pH - Field (SU) | Potassium (mg/L) |
|---------------|-------------|----------------------------------------|----------------------|------------------------------------------------------|---------------------------------|-------------|-----------------|-------------|-------------|------------------|------------------|----------------|--------------|---------------------|-------------------|-----------------|------------------|
| 1283          | 2/22/2010   | Rental House Basement At Pressure Tank | Upland               |                                                      | 7.98                            | < .025      |                 | < .05       |             | 6.98             | < .025           |                | 1.3          |                     |                   | 7.11            |                  |
| 1284          | 2/16/2010   | Kitchen Sink                           | Upland               |                                                      | 2.86                            | < .025      |                 | < .05       |             | 9.89             | < .025           |                | 0.2          |                     |                   | 7.03            |                  |
| 1285          | 2/21/2010   | Kitchen Sink                           | Upland               |                                                      | 3.01                            | < .043      |                 | < .05       |             | 9.1              | 0.072            |                | 280          |                     |                   | 7.72            |                  |
| 1286          | 2/18/2010   | Pressure Tank                          | Valley               |                                                      | 5.8                             | < .025      |                 | 14.7        |             | 11.6             | 0.43             |                | 1.3          |                     |                   | 6.63            |                  |
| 1287          | 2/6/2010    | Basement At Pressure Tank              | Valley               |                                                      | 8.24                            |             |                 | < .05       |             | 7.19             | < .025           |                | 0.2          |                     |                   | 7.07            |                  |
| 1288          | 2/13/2010   | Pressure Tank                          | Upland               |                                                      | 10.01                           | < .025      |                 | 0.055       |             | 9.06             | < .025           |                | 0.14         |                     |                   | 7.15            |                  |
| 1289          | 2/1/2010    | Basement Sink                          | Valley               | Yes                                                  | 10.13                           | < .025      |                 | < .05       |             | 6.99             | < .025           |                | 3.5          |                     |                   | 7.89            |                  |
| 1290          | 2/21/2010   | Pressure Tank                          | Upland               |                                                      | 10.9                            | < .025      |                 | 0.07        |             | 3.4              | < .025           |                | 0.32         |                     |                   | 7.24            |                  |
| 1291          | 2/21/2010   | Barn Well                              | Upland               |                                                      | 9.82                            | < .025      |                 | < .05       |             | 4.08             | < .025           |                | 0.58         |                     |                   | 6.09            |                  |
| 1292          | 2/16/2010   | Kitchen Sink                           | Upland               |                                                      | 5.86                            | < .025      |                 | < .05       |             | 7.62             | < .025           |                | 0.24         |                     |                   | 7.16            |                  |
| 1293          | 2/22/2010   | Hand Dug Well                          | Upland               |                                                      | 7.77                            | < .025      |                 | < .05       |             | 5.06             | < .025           |                | 1.4          |                     |                   | 6.81            |                  |
| 1294          | 2/16/2010   | Bathroom Sink                          | Upland               | Yes                                                  | 3.12                            | < .025      |                 | < .05       |             | 8.14             | < .025           |                | 0.17         |                     |                   | 7.24            |                  |
| 1295          | 2/16/2010   | Pressure Tank                          | Upland               |                                                      | 6.37                            |             |                 | < .05       |             | 8.27             | < .025           |                | 0.12         |                     |                   | 6.54            |                  |
| 1296          | 2/7/2010    | Main House Pressure Tank               | Valley               |                                                      | 5.16                            | < .025      |                 | 0.23        |             | 10.4             | 0.338            |                | 9.4          |                     |                   | 7.32            |                  |
| 1297          | 2/7/2010    | Rental Property Pressure Tank          | Upland               |                                                      | 8.07                            | < .025      |                 | < .05       |             | 6.55             | < .025           |                | 0.38         |                     |                   | 6.22            |                  |
| 1298          | 2/13/2010   | Kitchen Sink                           | Upland               |                                                      | 4.61                            | < .025      |                 | < .05       |             | 5.69             | < .025           |                | 7.9          |                     |                   | 7.59            |                  |
| 1299          | 2/13/2010   | Well House                             | Upland               |                                                      | 5.51                            | < .025      |                 | 0.081       |             | 7.19             | < .025           |                | 0.14         |                     |                   | 6.66            |                  |
| 1300          | 8/6/2009    |                                        | Valley               |                                                      |                                 |             |                 | 0.345       |             | 1.76             | < .025           |                | 1.4          |                     | < 5               |                 |                  |
| 1301          | 2/7/2010    | Barn - Pump                            | Upland               |                                                      | 8.07                            | < .025      |                 | 0.097       |             | 5.61             | < .025           |                | 0.46         |                     |                   | 6.34            |                  |
| 1302          | 2/7/2010    | Pressure Tank                          | Upland               |                                                      | 8.38                            | < .025      |                 | < .05       |             | 8.12             | < .025           |                | 0.47         |                     |                   | 7.2             |                  |
| 1303          | 2/7/2010    | Pressure Tank                          | Upland               |                                                      | 10.49                           | < .025      |                 | < .05       |             | 4.61             | < .025           |                | 0.27         |                     |                   | 7.61            |                  |
| 1304          | 2/6/2010    | Pressure Tank                          | Valley               |                                                      | 5.51                            | < .025      |                 | 2.53        |             | 15.6             | 0.033            |                | 60           |                     |                   | 7.29            |                  |
| 1305          | 2/6/2010    | Basement At Pressure Tank              | Valley               |                                                      | 5.66                            |             |                 | < .05       |             | 8.45             | < .025           |                | < .1         |                     |                   | 7.4             |                  |

Table S.8. Groundwater Quality Data for 1701 "Pre-Drill" Water Well Samples from Susquehanna County, Pennsylvania

| Water Well ID | Sample Date | Sampling Port                  | Topographic Location | Gas Extraction Area (Within 1 km of Active Gas Well) | Dissolved Oxygen - Field (mg/L) | Ethane ug/L | Hardness (mg/L) | Iron (mg/L) | Lead (mg/L) | Magnesium (mg/L) | Manganese (mg/L) | Mercury (mg/L) | Methane ug/L | Nitrate as N (mg/L) | Oil Grease (mg/L) | pH - Field (SU) | Potassium (mg/L) |
|---------------|-------------|--------------------------------|----------------------|------------------------------------------------------|---------------------------------|-------------|-----------------|-------------|-------------|------------------|------------------|----------------|--------------|---------------------|-------------------|-----------------|------------------|
| 1306          | 2/6/2010    | Pressure Tank                  | Valley               |                                                      | 8.65                            | < .025      |                 | < .05       |             | 8.18             | < .025           |                | < .1         |                     |                   | 7.53            |                  |
| 1307          | 2/15/2010   | Outside Hydrant                | Upland               | Yes                                                  | 7.76                            | < .025      |                 | < .05       |             | 6.82             | < .025           |                | 0.28         |                     |                   | 6.97            |                  |
| 1308          | 2/27/2010   | Hand Dug Well 1 Back Of House  | Valley               |                                                      | 4.4                             | < .025      |                 | < .05       |             | 2.01             | < .025           |                | 0.27         |                     |                   | 6.7             |                  |
| 1309          | 2/27/2010   | Hand Dug Well 2 Front Of House | Valley               |                                                      | 10.87                           | < .025      |                 | < .05       |             | 2.43             | < .025           |                | 0.4          |                     |                   | 6.4             |                  |
| 1310          | 2/7/2010    | Outside Faucet                 | Valley               |                                                      | 8.3                             | 0.03        |                 | 2.41        |             | 11.5             | 0.298            |                | 34           |                     |                   | 7.72            |                  |
| 1311          | 2/6/2010    | Basement At Pressure Tank      | Valley               |                                                      | 5.36                            |             |                 | 0.136       |             | 9.98             | 0.324            |                | 0.12         |                     |                   | 7.43            |                  |
| 1312          | 2/21/2010   | Kitchen Sink                   | Valley               |                                                      | 3.05                            | < .025      |                 | < .05       |             | 8.46             | 0.105            |                | 5.9          |                     |                   | 7.69            |                  |
| 1313          | 8/6/2009    |                                | Valley               |                                                      |                                 |             |                 | < .025      |             | 7.38             | < .025           |                | 5            |                     | < 5               |                 |                  |
| 1314          | 2/22/2010   | Milkhouse Sink                 | Upland               |                                                      | 7.2                             | < .025      |                 | < .05       |             | 10.6             | < .025           |                | 2.8          |                     |                   | 7.3             |                  |
| 1315          | 2/28/2010   | Pressure Tank                  | Valley               | Yes                                                  | 5.68                            | < .025      |                 | 0.074       |             | 7.97             | < .025           |                | 1.4          |                     |                   | 7.38            |                  |
| 1316          | 2/13/2010   | Basement Men'S Room Sink       | Upland               |                                                      | 7.92                            | 0.03        |                 | 0.386       |             | 16.4             | < .025           |                | 0.26         |                     |                   | 6.9             |                  |
| 1317          | 2/28/2010   | Outside Spigot                 | Valley               |                                                      | 3.57                            | 0.06        |                 | 0.417       |             | 8.65             | 0.273            |                | 1600         |                     |                   | 7.21            |                  |
| 1318          | 2/28/2010   | Kitchen Sink                   | Upland               |                                                      | 8.97                            | < .025      |                 | < .05       |             | 6.69             | < .025           |                | 0.79         |                     |                   | 7.46            |                  |
| 1319          | 2/27/2010   | Basement Pressure Tank         | Valley               |                                                      | 5.03                            | < .025      |                 | 1.58        |             | 8.68             | 0.047            |                | 57           |                     |                   | 7.21            |                  |
| 1320          | 3/16/2010   | Kitchen Sink                   | Valley               | Yes                                                  | 11.7                            | < .025      |                 | 0.238       |             | 1.07             | < .025           |                | 0.11         |                     |                   | 6.12            |                  |
| 1321          | 3/11/2010   | Kitchen Sink                   | Upland               | Yes                                                  | 7.4                             |             |                 | < .05       |             | < 4.78           | < .025           |                | 0.32         |                     |                   | 6.87            |                  |
| 1322          | 3/18/2010   | Kitchen Sink                   | Upland               |                                                      | 1.89                            |             |                 | < .05       |             | 4.54             | < .025           |                | 19000        |                     |                   | 7.36            |                  |
| 1323          | 8/11/2011   | Kitchen Sink                   | Upland               | Yes                                                  | 7.95                            | < .025      |                 |             |             |                  |                  |                | 0.13         |                     |                   | 6.06            |                  |
| 1324          | 8/11/2011   | Kitchen Sink                   | Valley               |                                                      | 5.56                            | < .025      |                 |             |             |                  |                  |                | 0.39         |                     |                   | 7.89            |                  |
| 1325          | 8/11/2011   | Kitchen Sink                   | Upland               |                                                      | 8.45                            | < .025      |                 |             |             |                  |                  |                | 0.11         |                     |                   | 6.82            |                  |
| 1326          | 8/11/2011   | Kitchen Sink                   | Upland               |                                                      | 8.54                            | < .025      |                 |             |             |                  |                  |                | 0.4          |                     |                   | 7.55            |                  |
| 1327          | 8/11/2011   | Kitchen Sink                   | Upland               |                                                      | 6.09                            | < .025      |                 |             |             |                  |                  |                | 0.2          |                     |                   | 7.89            |                  |
| 1328          | 8/11/2011   | Kitchen Sink                   | Upland               |                                                      | 67.5                            | < .025      |                 |             |             |                  |                  |                | 0.17         |                     |                   | 8.02            |                  |

Table S.8. Groundwater Quality Data for 1701 "Pre-Drill" Water Well Samples from Susquehanna County, Pennsylvania

| Water Well ID | Sample Date | Sampling Port  | Topographic Location | Gas Extraction Area (Within 1 km of Active Gas Well) | Dissolved Oxygen - Field (mg/L) | Ethane ug/L | Hardness (mg/L) | Iron (mg/L) | Lead (mg/L) | Magnesium (mg/L) | Manganese (mg/L) | Mercury (mg/L) | Methane ug/L | Nitrate as N (mg/L) | Oil Grease (mg/L) | pH - Field (SU) | Potassium (mg/L) |
|---------------|-------------|----------------|----------------------|------------------------------------------------------|---------------------------------|-------------|-----------------|-------------|-------------|------------------|------------------|----------------|--------------|---------------------|-------------------|-----------------|------------------|
| 1329          | 8/11/2011   | Kitchen Sink   | Upland               |                                                      | 6.32                            | < .025      |                 |             |             |                  |                  |                | 0.2          |                     |                   | 7.32            |                  |
| 1330          | 8/6/2009    |                | Valley               |                                                      |                                 |             |                 | < .025      |             | 3.95             | 0.1              |                | 10           |                     | < 5               |                 |                  |
| 1331          | 8/11/2011   | Kitchen Sink   | Upland               |                                                      | 68.1                            | < .025      |                 |             |             |                  |                  |                | 1.9          |                     |                   | 8.05            |                  |
| 1332          | 8/11/2011   | Kitchen Sink   | Valley               |                                                      | 6.21                            | < .025      |                 |             |             |                  |                  |                | 2.2          |                     |                   | 7.85            |                  |
| 1333          | 8/11/2011   | Kitchen Sink   | Upland               |                                                      | 5.56                            | 0.27        |                 |             |             |                  |                  |                | 2500         |                     |                   | 7.98            |                  |
| 1334          | 8/11/2011   | Kitchen Sink   | Valley               |                                                      |                                 | <0.025      |                 |             |             |                  |                  |                | 0.37         |                     |                   |                 |                  |
| 1335          | 8/12/2011   | Kitchen Sink   | Valley               |                                                      | 6.49                            | < .025      |                 |             |             |                  |                  |                | < .1         |                     |                   | 7.26            |                  |
| 1336          | 8/12/2011   | Kitchen Sink   | Valley               |                                                      | 6.11                            | < .025      |                 |             |             |                  |                  |                | 0.24         |                     |                   | 6.99            |                  |
| 1337          | 8/12/2011   | Kitchen Sink   | Valley               |                                                      | 10.6                            | < .025      |                 |             |             |                  |                  |                | 0.1          |                     |                   | 8.1             |                  |
| 1338          | 8/12/2011   | Kitchen Sink   | Valley               |                                                      | 3.18                            | < .025      |                 |             |             |                  |                  |                | 0.11         |                     |                   | 7.75            |                  |
| 1339          | 8/12/2011   | Kitchen Sink   | Valley               |                                                      | 7                               | < .025      |                 |             |             |                  |                  |                | 0.15         |                     |                   | 7.66            |                  |
| 1340          | 5/13/2010   |                | Upland               | Yes                                                  |                                 |             |                 |             |             |                  |                  |                | 50           |                     |                   |                 |                  |
| 1341          | 8/12/2011   | Pressure Tank  | Upland               |                                                      | 4.15                            | < .025      |                 |             |             |                  |                  |                | 0.15         |                     |                   | 7.3             |                  |
| 1342          | 8/12/2011   | Kitchen Sink   | Valley               |                                                      | 3.18                            | < .025      |                 |             |             |                  |                  |                | < .1         |                     |                   | 7.7             |                  |
| 1343          | 8/12/2011   | Bathroom Sink  | Valley               |                                                      | 4.11                            | < .025      |                 |             |             |                  |                  |                | 0.64         |                     |                   | 7.26            |                  |
| 1344          | 8/14/2011   | Outside Spigot | Valley               |                                                      | 7.32                            | 0.06        |                 |             |             |                  |                  |                | 340          |                     |                   | 8.13            |                  |
| 1345          | 8/14/2011   | Kitchen Sink   | Upland               |                                                      | 6.72                            | < .025      |                 |             |             |                  |                  |                | 56           |                     |                   | 6.76            |                  |
| 1346          | 5/13/2010   |                | Upland               |                                                      |                                 |             |                 | < .05       |             | 6.02             | < .025           |                | 24           |                     |                   |                 |                  |
| 1347          | 8/14/2011   | Kitchen Sink   | Valley               |                                                      | 6.71                            | < .025      |                 |             |             |                  |                  |                | 0.13         |                     |                   | 7.18            |                  |
| 1348          | 8/14/2011   | Kitchen Sink   | Upland               |                                                      | 9.55                            | < .025      |                 |             |             |                  |                  |                | 0.2          |                     |                   | 8.06            |                  |
| 1349          | 8/14/2011   | Kitchen Sink   | Upland               |                                                      | 5.59                            | < .025      |                 |             |             |                  |                  |                | 0.6          |                     |                   | 7.87            |                  |
| 1350          | 8/14/2011   | Pressure Tank  | Upland               |                                                      | 4.36                            | < .025      |                 |             |             |                  |                  |                | 0.19         |                     |                   | 7.85            |                  |
| 1351          | 8/14/2011   | Kitchen Sink   | Upland               |                                                      | 7.18                            | < .025      |                 |             |             |                  |                  |                | < .1         |                     |                   | 7.04            |                  |
| 1352          | 8/15/2011   | Kitchen Sink   | Upland               |                                                      | 5.72                            | < .025      |                 |             |             |                  |                  |                | 1.5          |                     |                   | 7.98            |                  |
| 1353          | 8/15/2011   | Barn Sink      | Upland               |                                                      | 8.36                            | < .025      |                 |             |             |                  |                  |                | 0.68         |                     |                   | 7.25            |                  |
| 1354          | 8/15/2011   | Kitchen Sink   | Valley               |                                                      | 6.09                            | < .025      |                 |             |             |                  |                  |                | 0.16         |                     |                   | 7.41            |                  |
| 1355          | 8/15/2011   | Kitchen Sink   | Valley               |                                                      | 5.48                            | < .025      |                 |             |             |                  |                  |                | 0.14         |                     |                   | 7.84            |                  |
| 1356          | 8/15/2011   | Sink In Barn   | Valley               |                                                      | 2.31                            | < .025      |                 |             |             |                  |                  |                | 14           |                     |                   | 7.22            |                  |

Table S.8. Groundwater Quality Data for 1701 "Pre-Drill" Water Well Samples from Susquehanna County, Pennsylvania

| Water Well ID | Sample Date | Sampling Port             | Topographic Location | Gas Extraction Area (Within 1 km of Active Gas Well) | Dissolved Oxygen - Field (mg/L) | Ethane ug/L | Hardness (mg/L) | Iron (mg/L) | Lead (mg/L) | Magnesium (mg/L) | Manganese (mg/L) | Mercury (mg/L) | Methane ug/L | Nitrate as N (mg/L) | Oil Grease (mg/L) | pH - Field (SU) | Potassium (mg/L) |
|---------------|-------------|---------------------------|----------------------|------------------------------------------------------|---------------------------------|-------------|-----------------|-------------|-------------|------------------|------------------|----------------|--------------|---------------------|-------------------|-----------------|------------------|
| 1357          | 8/16/2011   | Kitchen Sink              | Upland               |                                                      | 4.85                            | < .025      |                 |             |             |                  |                  |                | 0.1          |                     |                   | 7.46            |                  |
| 1358          | 8/16/2011   | Outside Spigot            | Upland               |                                                      | 3.52                            | < .025      |                 |             |             |                  |                  |                | 0.73         |                     |                   | 7.77            |                  |
| 1359          | 8/16/2011   | Kitchen Sink              | Upland               |                                                      | 2.48                            | < .025      |                 |             |             |                  |                  |                | 0.22         |                     |                   | 7.83            |                  |
| 1360          | 8/16/2011   | Kitchen Sink              | Upland               |                                                      | 2.43                            | < .025      |                 |             |             |                  |                  |                | 0.4          |                     |                   | 7.82            |                  |
| 1361          | 8/16/2011   | Kitchen Sink              | Valley               |                                                      | 7.03                            | < .025      |                 |             |             |                  |                  |                | 0.24         |                     |                   | 6.84            |                  |
| 1362          | 8/16/2011   | Spigot On Side Of House   | Upland               |                                                      | 7.9                             | < .025      |                 |             |             |                  |                  |                | 3            |                     |                   | 7.6             |                  |
| 1363          | 8/17/2011   | Kitchen Sink              | Upland               |                                                      | 5.64                            | < .025      |                 |             |             |                  |                  |                | 0.16         |                     |                   | 7.87            |                  |
| 1364          | 8/17/2011   | Outside Spigot            | Valley               |                                                      | 6.53                            | < .025      |                 |             |             |                  |                  |                | 0.18         |                     |                   | 6.96            |                  |
| 1365          | 8/17/2011   | Kitchen Sink              | Upland               |                                                      | 4.26                            | < .025      |                 |             |             |                  |                  |                | < .1         |                     |                   | 7.7             |                  |
| 1366          | 8/17/2011   | Kitchen Sink              | Valley               |                                                      | 2.31                            | 0.051       |                 |             |             |                  |                  |                | 620          |                     |                   | 8.15            |                  |
| 1367          | 8/17/2011   | Kitchen Sink              | Valley               |                                                      | 5.45                            | < .025      |                 |             |             |                  |                  |                | 2            |                     |                   | 7.87            |                  |
| 1368          | 8/17/2011   | Kitchen Sink              | Valley               |                                                      | 5.05                            | < .025      |                 |             |             |                  |                  |                | 0.12         |                     |                   | 7.51            |                  |
| 1369          | 8/18/2011   | Kitchen Sink              | Upland               |                                                      | 5.38                            | < .025      |                 |             |             |                  |                  |                | 0.48         |                     |                   | 7.77            |                  |
| 1370          | 2/8/2010    | Basement At Pressure Tank | Upland               | Yes                                                  | 5.21                            | < .025      |                 | < .05       |             | 3.24             | < .025           |                | 0.52         |                     |                   | 7.86            |                  |
| 1371          | 8/18/2011   | Kitchen Sink              | Valley               |                                                      | 4.09                            | < .025      |                 |             |             |                  |                  |                | 0.27         |                     |                   | 7.81            |                  |
| 1372          | 8/18/2011   | Kitchen Sink              | Valley               |                                                      | 5.53                            | < .025      |                 |             |             |                  |                  |                | 17           |                     |                   | 7.34            |                  |
| 1373          | 8/18/2011   | Kitchen Sink              | Valley               |                                                      | 6.49                            | 0.025       |                 |             |             |                  |                  |                | 0.28         |                     |                   | 6.88            |                  |
| 1374          | 8/18/2011   | Barn Sink                 | Upland               |                                                      | 3.14                            | < .025      |                 |             |             |                  |                  |                | 0.51         |                     |                   | 7.75            |                  |
| 1375          | 8/18/2011   | Barn Sink                 | Valley               |                                                      | 4.29                            | < .025      |                 |             |             |                  |                  |                | < .1         |                     |                   | 7.13            |                  |
| 1376          | 3/8/2010    | Kitchen Sink              | Valley               | Yes                                                  | 3.16                            | < .025      |                 | < .05       |             | < 1              | < .025           |                | 0.18         |                     |                   | 8.32            |                  |
| 1377          | 8/18/2011   | Kitchen Sink              | Upland               |                                                      | 6.05                            | < .025      |                 |             |             |                  |                  |                | 0.33         |                     |                   | 7.87            |                  |
| 1378          | 8/19/2011   | Kitchen Sink              | Upland               |                                                      | 5.55                            | < .025      |                 |             |             |                  |                  |                | 360          |                     |                   | 7.32            |                  |
| 1379          | 8/19/2011   | Kitchen Sink              | Upland               |                                                      | 5                               | <0.025      |                 |             |             |                  |                  |                | <0.1         |                     |                   | 7.45            |                  |
| 1380          | 8/19/2011   | Kitchen Sink              | Upland               |                                                      |                                 | 0.22        |                 |             |             |                  |                  |                | 340          |                     |                   |                 |                  |
| 1381          | 8/17/2009   |                           | Valley               |                                                      |                                 |             |                 | < .025      |             | 3.42             | < .025           |                | 7.4          |                     | < 5               |                 |                  |
| 1382          | 8/19/2011   |                           | Valley               |                                                      | 4.55                            | < .025      |                 |             |             |                  |                  |                | 2.2          |                     |                   | 7.95            |                  |

Table S.8. Groundwater Quality Data for 1701 "Pre-Drill" Water Well Samples from Susquehanna County, Pennsylvania

| Water Well ID | Sample Date | Sampling Port               | Topographic Location | Gas Extraction Area (Within 1 km of Active Gas Well) | Dissolved Oxygen - Field (mg/L) | Ethane ug/L | Hardness (mg/L) | Iron (mg/L) | Lead (mg/L) | Magnesium (mg/L) | Manganese (mg/L) | Mercury (mg/L) | Methane ug/L | Nitrate as N (mg/L) | Oil Grease (mg/L) | pH - Field (SU) | Potassium (mg/L) |
|---------------|-------------|-----------------------------|----------------------|------------------------------------------------------|---------------------------------|-------------|-----------------|-------------|-------------|------------------|------------------|----------------|--------------|---------------------|-------------------|-----------------|------------------|
| 1383          | 8/19/2011   | Kitchen Sink                | Valley               |                                                      | 5.94                            | < .025      |                 |             |             |                  |                  |                | 3.1          |                     |                   | 7.83            |                  |
| 1384          | 8/22/2011   | Kitchen Sink                | Upland               |                                                      | 5.57                            | < .025      |                 |             |             |                  |                  |                | 1.7          |                     |                   | 6.86            |                  |
| 1385          | 8/22/2011   | Kitchen Sink                | Upland               |                                                      | 6.49                            | < .025      |                 |             |             |                  |                  |                | < .1         |                     |                   | 7.49            |                  |
| 1386          | 8/23/2011   | Outside Spigot              | Upland               |                                                      | 7.39                            | < .025      |                 |             |             |                  |                  |                | < .1         |                     |                   | 7.09            |                  |
| 1387          | 8/23/2011   | Barn Outside Spigot         | Upland               |                                                      | 7.73                            | < .025      |                 |             |             |                  |                  |                | 2.9          |                     |                   | 8.41            |                  |
| 1388          | 8/23/2011   | Outside Spigot              | Upland               |                                                      | 5.61                            | < .025      |                 |             |             |                  |                  |                | 0.7          |                     |                   | 7.81            |                  |
| 1389          | 3/4/2010    | Post Office - Bathroom Sink | Upland               | Yes                                                  | 4.38                            | < .025      |                 | < .05       |             | 9.68             | < .025           |                | 0.2          |                     |                   | 7.45            |                  |
| 1390          | 8/23/2011   | Outside Spigot              | Valley               |                                                      | 7.27                            | < .025      |                 |             |             |                  |                  |                | 31           |                     |                   | 7.05            |                  |
| 1391          | 8/23/2011   | Outside Spigot              | Upland               |                                                      | 4.85                            | < .025      |                 |             |             |                  |                  |                | 0.15         |                     |                   | 7.72            |                  |
| 1392          | 8/24/2011   | Kitchen Sink                | Upland               |                                                      | 5.83                            | < .025      |                 |             |             |                  |                  |                | < .1         |                     |                   | 6.56            |                  |
| 1393          | 8/24/2011   | Kitchen Sink                | Upland               |                                                      | 5.96                            | < .025      |                 |             |             |                  |                  |                | 1.7          |                     |                   | 6.96            |                  |
| 1394          | 8/24/2011   | Kitchen Sink                | Valley               |                                                      | 6.59                            | 0.066       |                 |             |             |                  |                  |                | 2            |                     |                   | 7.45            |                  |
| 1395          | 8/24/2011   | Kitchen Sink                | Upland               |                                                      | 6.85                            | < .025      |                 |             |             |                  |                  |                | 0.2          |                     |                   | 6.66            |                  |
| 1396          | 8/24/2011   | Kitchen Sink                | Valley               |                                                      | 5.67                            | < .025      |                 |             |             |                  |                  |                | 0.21         |                     |                   | 6.84            |                  |
| 1397          | 8/24/2011   | Inside Faucet               | Upland               |                                                      | 7.22                            | < .025      |                 |             |             |                  |                  |                | 0.15         |                     |                   | 7.78            |                  |
| 1398          | 8/24/2011   | Kitchen Sink                | Upland               |                                                      | 6.72                            | < .025      |                 |             |             |                  |                  |                | < .1         |                     |                   | 6.75            |                  |
| 1399          | 8/24/2011   | Kitchen Sink                | Valley               |                                                      | 7.92                            | < .025      |                 |             |             |                  |                  |                | 2.4          |                     |                   | 6.55            |                  |
| 1400          | 3/8/2010    | Basement At Pressure Tank   | Upland               |                                                      | 6.27                            | < .025      |                 | 0.444       |             | 4.06             | 0.04             |                | 1.2          |                     |                   | 7.47            |                  |
| 1401          | 8/24/2011   | Kitchen Sink                | Upland               |                                                      |                                 | <0.025      |                 |             |             |                  |                  |                | <0.1         |                     |                   |                 |                  |
| 1402          | 8/24/2011   | Kitchen Sink                | Upland               |                                                      | 4.89                            | < .025      |                 |             |             |                  |                  |                | 43           |                     |                   | 7.89            |                  |
| 1403          | 8/24/2011   | Kitchen Sink                | Upland               |                                                      | 5.84                            | < .025      |                 |             |             |                  |                  |                | < .1         |                     |                   | 7               |                  |
| 1404          | 8/24/2011   | Bathroom Sink               | Valley               |                                                      | 6.33                            | 0.044       |                 |             |             |                  |                  |                | 0.82         |                     |                   | 7.64            |                  |
| 1405          | 8/24/2011   | Kitchen Sink                | Valley               |                                                      | 5.3                             | < .025      |                 |             |             |                  |                  |                | 0.28         |                     |                   | 7.34            |                  |
| 1406          | 8/25/2011   | Kitchen Sink                | Valley               |                                                      | 5.88                            | < .025      |                 |             |             |                  |                  |                | 0.22         |                     |                   | 7.84            |                  |

Table S.8. Groundwater Quality Data for 1701 "Pre-Drill" Water Well Samples from Susquehanna County, Pennsylvania

| Water Well ID | Sample Date | Sampling Port             | Topographic Location | Gas Extraction Area (Within 1 km of Active Gas Well) | Dissolved Oxygen - Field (mg/L) | Ethane ug/L | Hardness (mg/L) | Iron (mg/L) | Lead (mg/L) | Magnesium (mg/L) | Manganese (mg/L) | Mercury (mg/L) | Methane ug/L | Nitrate as N (mg/L) | Oil Grease (mg/L) | pH - Field (SU) | Potassium (mg/L) |
|---------------|-------------|---------------------------|----------------------|------------------------------------------------------|---------------------------------|-------------|-----------------|-------------|-------------|------------------|------------------|----------------|--------------|---------------------|-------------------|-----------------|------------------|
| 1407          | 8/25/2011   | Kitchen Sink              | Valley               |                                                      | 5.33                            | < .025      |                 |             |             |                  |                  |                | 4.1          |                     |                   | 7.21            |                  |
| 1408          | 8/25/2011   | Kitchen Sink              | Valley               |                                                      | 3.1                             | 0.065       |                 |             |             |                  |                  |                | 940          |                     |                   | 8.2             |                  |
| 1409          | 8/25/2011   | Downstairs Sink           | Valley               |                                                      | 5.41                            | <0.025      |                 |             |             |                  |                  |                | 0.16         |                     |                   | 7.54            |                  |
| 1410          | 8/25/2011   | Kitchen Sink              | Upland               |                                                      | 6.39                            | < .025      |                 |             |             |                  |                  |                | 0.15         |                     |                   | 7.68            |                  |
| 1411          | 8/25/2011   | Kitchen Sink              | Valley               |                                                      | 4.09                            | 1.2         |                 |             |             |                  |                  |                | 5600         |                     |                   | 7.67            |                  |
| 1412          | 8/25/2011   | Kitchen Sink              | Valley               |                                                      | 4.86                            | 0.86        |                 |             |             |                  |                  |                | 2800         |                     |                   | 8.37            |                  |
| 1413          | 8/26/2011   | Kitchen Sink              | Upland               |                                                      | 5.24                            | < .025      |                 |             |             |                  |                  |                | 0.27         |                     |                   | 7.27            |                  |
| 1414          | 8/26/2011   | Outside Spigot            | Valley               |                                                      | 3.62                            | < .025      |                 |             |             |                  |                  |                | 14           |                     |                   | 7.07            |                  |
| 1415          | 8/26/2011   | Kitchen Sink              | Upland               |                                                      | 6.38                            | < .025      |                 |             |             |                  |                  |                | 0.18         |                     |                   | 7.9             |                  |
| 1416          | 8/26/2011   | Kitchen Sink              | Valley               |                                                      | 4.69                            | < .025      |                 |             |             |                  |                  |                | 0.55         |                     |                   | 7.71            |                  |
| 1417          | 8/26/2011   | Kitchen Sink              | Upland               |                                                      | 5.73                            | < .025      |                 |             |             |                  |                  |                | 0.11         |                     |                   | 7.26            |                  |
| 1418          | 8/26/2011   | Kitchen Sink              | Upland               |                                                      | 4.4                             | < .025      |                 |             |             |                  |                  |                | 1.9          |                     |                   | 8               |                  |
| 1419          | 8/26/2011   | Barn Sink                 | Valley               |                                                      | 4.23                            | 0.96        |                 |             |             |                  |                  |                | 4700         |                     |                   | 8.24            |                  |
| 1420          | 8/27/2011   | Kitchen Sink              | Upland               |                                                      | 6.56                            | < .025      |                 |             |             |                  |                  |                | 0.3          |                     |                   | 7.48            |                  |
| 1421          | 8/27/2011   | Kitchen Sink              | Upland               |                                                      | 7.76                            | < .025      |                 |             |             |                  |                  |                | 1.4          |                     |                   | 7.09            |                  |
| 1422          | 10/30/2009  | Basement At Pressure Tank | Upland               | Yes                                                  | 7.79                            | < .025      |                 | < .05       |             | 4.58             | < .025           |                | 1.4          |                     |                   | 7.09            |                  |
| 1423          | 8/31/2011   | Kitchen Sink              | Upland               |                                                      | 5.75                            | < .025      |                 |             |             |                  |                  |                | 0.23         |                     |                   | 7.35            |                  |
| 1424          | 8/31/2011   | Kitchen Sink              | Valley               |                                                      |                                 | <0.025      |                 |             |             |                  |                  |                | 0.14         |                     |                   |                 |                  |
| 1425          | 8/31/2011   | Spigot On Well            | Valley               |                                                      | 4.1                             | < .025      |                 |             |             |                  |                  |                | 0.36         |                     |                   | 7.57            |                  |
| 1426          | 8/31/2011   | Kitchen Sink              | Upland               |                                                      | 6.04                            | 0.15        |                 |             |             |                  |                  |                | 1            |                     |                   | 6.88            |                  |
| 1427          | 9/1/2011    | Kitchen Sink              | Valley               |                                                      | 4.82                            | < .025      |                 |             |             |                  |                  |                | < .1         |                     |                   | 7.59            |                  |
| 1428          | 9/1/2011    | Spigot Side Of House      | Valley               |                                                      | 5.68                            | < .025      |                 |             |             |                  |                  |                | 0.19         |                     |                   | 7.54            |                  |
| 1429          | 9/2/2011    | Kitchen Sink              | Upland               |                                                      | 5.07                            | < .025      |                 |             |             |                  |                  |                | 0.66         |                     |                   | 7.38            |                  |
| 1430          | 9/2/2011    | Spigot On Well            | Valley               |                                                      | 5.55                            | < .025      |                 |             |             |                  |                  |                | < .1         |                     |                   | 7.27            |                  |
| 1431          | 3/7/2010    | Kitchen Sink              | Valley               |                                                      | 2.46                            | 0.19        |                 | < .05       |             | < 1              | < .025           |                | 9            |                     |                   | 7.67            |                  |



Table S.8. Groundwater Quality Data for 1701 "Pre-Drill" Water Well Samples from Susquehanna County, Pennsylvania

| Water Well ID | Sample Date | Sampling Port             | Topographic Location | Gas Extraction Area (Within 1 km of Active Gas Well) | Dissolved Oxygen - Field (mg/L) | Ethane ug/L | Hardness (mg/L) | Iron (mg/L) | Lead (mg/L) | Magnesium (mg/L) | Manganese (mg/L) | Mercury (mg/L) | Methane ug/L | Nitrate as N (mg/L) | Oil Grease (mg/L) | pH - Field (SU) | Potassium (mg/L) |
|---------------|-------------|---------------------------|----------------------|------------------------------------------------------|---------------------------------|-------------|-----------------|-------------|-------------|------------------|------------------|----------------|--------------|---------------------|-------------------|-----------------|------------------|
| 1432          | 9/2/2011    | Kitchen Sink              | Upland               |                                                      | 4.29                            | < .025      |                 |             |             |                  |                  |                | 46           |                     |                   | 7.69            |                  |
| 1433          | 9/2/2011    | Kitchen Sink              | Valley               |                                                      | 5.85                            | < .025      |                 |             |             |                  |                  |                | < .1         |                     |                   | 7.51            |                  |
| 1434          | 9/2/2011    | Bathroom Sink             | Upland               |                                                      | 6.73                            | < .025      |                 |             |             |                  |                  |                | < .1         |                     |                   | 7.2             |                  |
| 1435          | 9/2/2011    | Kitchen Sink              | Upland               |                                                      | 5.42                            | < .025      |                 |             |             |                  |                  |                | 0.39         |                     |                   | 7.6             |                  |
| 1436          | 9/2/2011    | Well Spigot               | Upland               |                                                      | 5.91                            | < .025      |                 |             |             |                  |                  |                | < .1         |                     |                   | 6.78            |                  |
| 1437          | 3/8/2010    | Basement At Pressure Tank | Upland               |                                                      | 6.81                            | < .025      |                 | < .05       |             | 5.03             | < .025           |                | 0.56         |                     |                   | 7.43            |                  |
| 1438          | 9/2/2011    | Kitchen Sink              | Valley               |                                                      | 4.48                            | < .025      |                 |             |             |                  |                  |                | < .1         |                     |                   | 7.91            |                  |
| 1439          | 9/7/2011    | Kitchen Sink              | Upland               |                                                      | 7.9                             | < .025      |                 |             |             |                  |                  |                | 1.3          |                     |                   | 7               |                  |
| 1440          | 9/7/2011    | Kitchen Sink              | Upland               |                                                      | 4.37                            | < .025      |                 |             |             |                  |                  |                | 0.17         |                     |                   | 7.8             |                  |
| 1441          | 9/7/2011    | Kitchen Sink              | Valley               |                                                      | 8.56                            | < .025      |                 |             |             |                  |                  |                | 0.24         |                     |                   | 7.35            |                  |
| 1442          | 9/7/2011    | Kitchen Sink              | Upland               |                                                      | 7.25                            | < .025      |                 |             |             |                  |                  |                | 0.54         |                     |                   | 7.99            |                  |
| 1443          | 9/8/2011    | Kitchen Faucet            | Valley               |                                                      |                                 | < .025      |                 |             |             |                  |                  |                | 17           |                     |                   |                 |                  |
| 1444          | 9/8/2011    | Kitchen Sink              | Valley               |                                                      | 4.58                            | < .025      |                 |             |             |                  |                  |                | 1.9          |                     |                   | 7.58            |                  |
| 1445          | 9/8/2011    | Outside Spigot            | Upland               |                                                      | 6.6                             | < .025      |                 |             |             |                  |                  |                | 0.19         |                     |                   | 7.32            |                  |
| 1446          | 9/8/2011    | Kitchen Sink              | Valley               |                                                      | 5.94                            | < .025      |                 |             |             |                  |                  |                | 0.57         |                     |                   | 7.54            |                  |
| 1447          | 9/8/2011    | Kitchen Sink              | Upland               |                                                      | 6.2                             | < .025      |                 |             |             |                  |                  |                | 0.16         |                     |                   | 7.94            |                  |
| 1448          | 9/8/2011    | Kitchen Sink              | Upland               |                                                      | 5.84                            | < .025      |                 |             |             |                  |                  |                | 0.19         |                     |                   | 7               |                  |
| 1449          | 9/8/2011    | Kitchen Sink              | Upland               |                                                      | 203                             | < .025      |                 |             |             |                  |                  |                | 0.17         |                     |                   | 7.72            |                  |
| 1450          | 3/8/2010    | Basement Pressure Tank    | Upland               |                                                      | 5.73                            | < .025      |                 | < .05       |             | 4.8              | < .025           |                | 0.25         |                     |                   | 7.62            |                  |
| 1451          | 8/20/2009   |                           | Upland               | Yes                                                  |                                 |             |                 | < .025      |             | 5.98             | < .025           |                | 0.53         |                     | < 5               |                 |                  |
| 1452          | 3/7/2010    | Pressure Tank             | Upland               |                                                      | 5.53                            | < .025      |                 | < .05       |             | 3.16             | < .025           |                | 0.35         |                     |                   | 7.47            |                  |
| 1453          | 3/7/2010    | Kitchen Sink              | Upland               |                                                      | 5.55                            |             |                 | < .05       |             | 5.25             | < .025           |                | 0.25         |                     |                   | 7.51            |                  |
| 1454          | 3/11/2010   | Pressure Tank             | Valley               |                                                      | 5.03                            |             |                 | < .05       |             | 7.95             | < .025           |                | 2.4          |                     |                   | 7.49            |                  |
| 1455          | 5/1/2010    | Kitchen Sink              | Valley               |                                                      |                                 |             |                 | < .05       |             | 7.35             | < .025           |                | 6.1          |                     |                   |                 |                  |
| 1456          | 5/1/2010    | Kitchen Sink              | Valley               |                                                      | 13.63                           |             |                 | < .05       |             | 1.74             | < .025           |                | 1.4          |                     |                   | 6.5             |                  |

Table S.8. Groundwater Quality Data for 1701 "Pre-Drill" Water Well Samples from Susquehanna County, Pennsylvania

| Water Well ID | Sample Date | Sampling Port                  | Topographic Location | Gas Extraction Area (Within 1 km of Active Gas Well) | Dissolved Oxygen - Field (mg/L) | Ethane ug/L | Hardness (mg/L) | Iron (mg/L) | Lead (mg/L) | Magnesium (mg/L) | Manganese (mg/L) | Mercury (mg/L) | Methane ug/L | Nitrate as N (mg/L) | Oil Grease (mg/L) | pH - Field (SU) | Potassium (mg/L) |
|---------------|-------------|--------------------------------|----------------------|------------------------------------------------------|---------------------------------|-------------|-----------------|-------------|-------------|------------------|------------------|----------------|--------------|---------------------|-------------------|-----------------|------------------|
| 1457          | 5/3/2010    | Outside Spigot On Garage       | Upland               | Yes                                                  | 10.82                           |             |                 | < .05       |             | 1.31             | < .025           |                | 3.6          |                     |                   | 6.29            |                  |
| 1458          | 5/6/2010    | Kitchen Sink                   | Upland               |                                                      | 6.5                             |             |                 | < .05       |             | 6.19             | < .025           |                | 0.2          |                     |                   | 7.3             |                  |
| 1459          | 5/6/2010    | Kitchen Sink                   | Valley               | Yes                                                  | 25.4                            |             |                 | < .05       |             | 2.28             | < .025           |                | 18000        |                     |                   | 8.39            |                  |
| 1460          | 5/7/2010    | Kitchen Sink                   | Valley               | Yes                                                  | 4.71                            |             |                 | < .05       |             | 3.55             | < .025           |                | 0.52         |                     |                   | 7.69            |                  |
| 1461          | 8/24/2011   | Kitchen Sink                   | Valley               |                                                      | 3.73                            | < 26        | 98              | < .05       | < .001      | 5.3              | 0.001            | < .0002        | < 26         | 0.66                |                   | 7.7             | 1                |
| 1462          | 8/24/2011   | Inside Faucet                  | Valley               |                                                      | 0.95                            | < 26        | 100             | 0.056       | < .001      | 6.5              | 0.0093           | < .0002        | < 26         | 0.39                |                   | 7.95            | 1.3              |
| 1463          | 8/24/2011   | Pressure Tank Hose Bib         | Upland               |                                                      | 4.93                            | < 26        | 58              | < .05       | < .001      | 2.5              | 0.0014           | < .0002        | 43.5         | 0.38                |                   | 7.21            | 0.99             |
| 1464          | 5/7/2010    | Outside Spigot                 | Upland               |                                                      |                                 |             |                 | < .05       |             | 6.16             | < .025           |                | < .1         |                     |                   |                 |                  |
| 1465          | 8/30/2011   | Inside Faucet                  | Valley               |                                                      | 4.3                             | < 5         | 180             | 0.17        | < .001      | 19               | 0.0097           | < .0002        | < 5          | 0.077               |                   | 7.06            | 1.5              |
| 1466          | 5/13/2010   | Kitchen Sink                   | Valley               |                                                      | 4.62                            | < .025      |                 | < .05       |             | 6.69             | < .025           |                | 0.29         |                     |                   | 7.48            |                  |
| 1467          | 8/30/2011   | Pressure Tank                  | Valley               |                                                      | 4.13                            | < 5         | 140             | 0.34        | 0.0026      | 15               | 0.025            | < .0002        | < 5          | 0.18                |                   | 6.79            | 1.4              |
| 1468          | 5/13/2010   | Kitchen Sink                   | Upland               |                                                      | 3.79                            |             |                 | < .05       |             | 7.85             | < .025           |                | 0.12         |                     |                   | 7.58            |                  |
| 1469          | 5/13/2010   | Outside Spigot                 | Upland               |                                                      | 6.23                            |             |                 | < .05       |             | 7.47             | < .025           |                | 0.11         |                     |                   | 7.52            |                  |
| 1470          | 8/30/2011   | Inside Faucet                  | Upland               |                                                      | 4.47                            | < 5         | 140             | 0.14        | < .001      | 14               | 0.00076          | < .0002        | < 5          | 0.54                |                   | 7.58            | 1.8              |
| 1471          | 7/7/2009    | Kitchen Sink                   | Upland               |                                                      | 4.95                            | < .025      |                 | < .025      |             | 4                | < .025           |                | < .1         |                     | < 5               | 7.61            |                  |
| 1472          | 5/20/2010   | Kitchen Sink                   | Upland               |                                                      | 3.73                            |             |                 | < .05       |             | 6.93             | < .025           |                | 1.1          |                     |                   | 7.44            |                  |
| 1473          | 5/20/2010   | Basement At Pressure Tank      | Upland               |                                                      | 8.83                            |             |                 | < .05       |             | 4.88             | < .025           |                | < .1         |                     |                   | 7.06            |                  |
| 1474          | 5/20/2010   | Pressure Tank- Quarry Top Well | Upland               |                                                      |                                 |             |                 |             |             |                  |                  |                | 4.6          |                     |                   |                 |                  |
| 1475          | 5/20/2010   | Pressure Tank At Trailer Park  | Upland               |                                                      | 6.81                            |             |                 | < .05       |             | 7.43             | 0.104            |                | 1.7          |                     |                   | 7.59            |                  |
| 1476          | 5/20/2010   | Quarry Sulfur Well             | Upland               |                                                      | 5.17                            |             |                 | < .05       |             | 7.44             | < .025           |                | 0.98         |                     |                   | 7.45            |                  |
| 1477          | 5/20/2010   | Spigot In Garage               | Upland               |                                                      | 10.01                           |             |                 | < .05       |             | 3.38             | < .025           |                | 0.26         |                     |                   | 7.43            |                  |
| 1478          | 3/16/2010   | Outside Spigot                 | Upland               |                                                      | 10.59                           | < .025      |                 | 0.103       |             | 1.93             | < .025           |                | 0.87         |                     |                   | 6.52            |                  |

Table S.8. Groundwater Quality Data for 1701 "Pre-Drill" Water Well Samples from Susquehanna County, Pennsylvania

| Water Well ID | Sample Date | Sampling Port                                      | Topographic Location | Gas Extraction Area (Within 1 km of Active Gas Well) | Dissolved Oxygen - Field (mg/L) | Ethane ug/L | Hardness (mg/L) | Iron (mg/L) | Lead (mg/L) | Magnesium (mg/L) | Manganese (mg/L) | Mercury (mg/L) | Methane ug/L | Nitrate as N (mg/L) | Oil Grease (mg/L) | pH - Field (SU) | Potassium (mg/L) |
|---------------|-------------|----------------------------------------------------|----------------------|------------------------------------------------------|---------------------------------|-------------|-----------------|-------------|-------------|------------------|------------------|----------------|--------------|---------------------|-------------------|-----------------|------------------|
| 1479          | 4/19/2009   | Kitchen Sink                                       | Upland               |                                                      | 9.88                            | < .025      |                 | < .025      |             | 5.36             | < .025           |                | 0.77         |                     | < 5               | 6.6             |                  |
| 1480          | 3/18/2010   | Kitchen Sink                                       | Upland               |                                                      | 10.62                           | < .025      |                 | < .05       |             | 1.82             | < .025           |                | 1.8          |                     |                   | 5.82            |                  |
| 1481          | 3/18/2010   | Pressure Tank                                      | Upland               | Yes                                                  | 9.5                             | < .025      |                 | < .05       |             | 1.99             | < .025           |                | 35           |                     |                   | 5.84            |                  |
| 1482          | 3/22/2010   | Kitchen Sink                                       | Valley               | Yes                                                  | 9.56                            | < .025      |                 | < .05       |             | 3.32             | < .025           |                | 2.1          |                     |                   | 7.02            |                  |
| 1483          | 1/13/2011   |                                                    | Valley               | Yes                                                  |                                 | 1.3         | 107.416         | < .05       | 0.0016      | 8.5              | 0.023            | < .0002        | 39           | < 1                 | < 5               |                 | 1.3              |
| 1484          | 3/25/2010   | Basement At Pressure Tank                          | Upland               |                                                      | 6.43                            |             |                 | < .05       |             | 5.7              | < .025           |                | 1.4          |                     |                   | 7.64            |                  |
| 1485          | 3/25/2010   | Hand Dug Well                                      | Valley               |                                                      | 11.96                           | < .025      |                 | < .05       |             | 1.44             | < .025           |                | 1.4          |                     |                   | 6.15            |                  |
| 1486          | 6/14/2011   | Directly From Pressure Tank Cwt In Sw Corner Of Ba | Upland               | Yes                                                  | 10.03                           | < 26        | 50              | 0.54        | < .001      | 3.7              | 0.0099           | < .0002        | < 26         | 0.4                 |                   | 7.19            | 1                |
| 1487          | 6/14/2011   | Kitchen Sink                                       | Upland               |                                                      | 2.91                            | < 26        | 140             | 0.1         | 0.0025      | 9                | 0.08             | < .0002        | < 26         | < .05               |                   | 7.6             | 1.3              |
| 1488          | 6/14/2011   | Hose Bib                                           | Upland               |                                                      | 3.6                             | < 26        | 63              | 0.18        | < .001      | 4.4              | 0.0019           | < .0002        | < 26         | 7.8                 | < 4.9             | 6.29            | 13               |
| 1489          | 3/25/2010   | Spring At Overflow Pipe                            | Valley               |                                                      | 11.68                           | < .025      |                 | < .05       |             | 1.98             | < .025           |                | 0.13         |                     |                   | 6.07            |                  |
| 1490          | 6/14/2011   | Outside Hose Bib On Sw End Of Home                 | Valley               |                                                      | 2.5                             | < 26        | 99              | 0.12        | < .001      | 5                | 0.22             | < .0002        | < 26         | 0.35                |                   | 7.24            | 1.4              |
| 1491          | 3/28/2010   | Basement At Pressure Tank                          | Upland               |                                                      | 5.89                            | 0.25        |                 | < .05       |             | 4.75             | 0.938            |                | 8100         |                     |                   | 6.93            |                  |
| 1492          | 1/13/2011   |                                                    | Upland               | Yes                                                  | 9.24                            | <0.025      | 92.565          | <0.05       | <0.0003     | 5.5              | <0.0025          | <0.0002        | 0.16         | <1                  | <5                | 6.96            | 1.3              |
| 1493          | 6/16/2011   | Wash Tub In Garage                                 | Upland               |                                                      | 6.43                            | < 26        | 120             | < .05       | < .001      | 7.8              | 0.017            | < .0002        | < 26         | 0.053               | < 4.7             | 7.43            | 1.3              |
| 1494          | 6/16/2011   | Kitchen Sink                                       | Valley               |                                                      | 19.86                           | < 26        | 74              | 0.073       | 0.0029      | 3.3              | 0.0016           | < .0002        | < 26         | 1.5                 |                   | 6.02            | 1                |
| 1495          | 6/27/2011   | Bathroom Sink Body Shop                            | Valley               | Yes                                                  | 6.55                            | < 26        | 96              | 0.059       | < .001      | 9.8              | 0.0018           | < .0002        | < 26         | 0.2                 |                   | 7.31            | 1.2              |
| 1496          | 6/28/2011   | Garage Sink                                        | Valley               |                                                      | 8.94                            | < 26        | 98              | < .05       | < .001      | 5.7              | < .0005          | < .0002        | < 26         | 0.58                |                   | 7.55            | 1.1              |
| 1497          | 6/28/2011   | Kitchen Sink                                       | Upland               |                                                      | 13.03                           | < 26        | 110             | < .05       | < .001      | 5.5              | < .0005          | < .0002        | < 26         | 0.4                 |                   | 7.26            | 0.88             |

Table S.8. Groundwater Quality Data for 1701 "Pre-Drill" Water Well Samples from Susquehanna County, Pennsylvania

| Water Well ID | Sample Date | Sampling Port               | Topographic Location | Gas Extraction Area (Within 1 km of Active Gas Well) | Dissolved Oxygen - Field (mg/L) | Ethane ug/L | Hardness (mg/L) | Iron (mg/L) | Lead (mg/L) | Magnesium (mg/L) | Manganese (mg/L) | Mercury (mg/L) | Methane ug/L | Nitrate as N (mg/L) | Oil Grease (mg/L) | pH - Field (SU) | Potassium (mg/L) |
|---------------|-------------|-----------------------------|----------------------|------------------------------------------------------|---------------------------------|-------------|-----------------|-------------|-------------|------------------|------------------|----------------|--------------|---------------------|-------------------|-----------------|------------------|
| 1498          | 3/18/2010   | Kitchen Sink                | Upland               |                                                      | 5.19                            |             |                 | < .05       |             | 4.8              | < .025           |                | 4.4          |                     |                   | 7.01            |                  |
| 1499          | 5/21/2010   | Kitchen Sink                | Upland               | Yes                                                  | 2.68                            |             |                 | < .05       |             | 5.37             | < .025           |                | 0.54         |                     |                   | 7.27            |                  |
| 1500          | 5/21/2010   | Hand Dug #1                 | Upland               | Yes                                                  | 7.8                             |             |                 | < .05       |             | 1.38             | < .025           |                | 3.6          |                     |                   | 5.81            |                  |
| 1501          | 7/6/2011    | Kitchen Sink                | Upland               |                                                      | 220                             | < 26        | 130             | < .05       | < .001      | 7.8              | < .0005          | < .0002        | < 26         | 1.2                 |                   | 6.23            | 1.3              |
| 1502          | 7/6/2011    | Kitchen Sink                | Upland               |                                                      | 404                             | < 26        | 82              | < .05       | < .001      | 5.8              | < .0005          | < .0002        | < 26         | 4.5                 |                   | 6.24            | 1.3              |
| 1503          | 5/21/2010   | Hand Dug Well #2            | Upland               | Yes                                                  | 10.52                           |             |                 | < .05       |             | 1.61             | < .025           |                | 0.55         |                     |                   | 5.84            |                  |
| 1504          | 7/6/2011    | Kitchen Sink                | Valley               |                                                      | 598                             | < 26        | 72              | < .05       | < .001      | 4.9              | < .0005          | < .0002        | < 26         | 6.3                 |                   | 6.59            | 0.97             |
| 1505          | 7/6/2011    | Kitchen Sink                | Upland               |                                                      | 6.43                            | < 26        | 94              | 0.82        | < .001      | 4.4              | 0.0049           | < .0002        | < 26         | 0.98                |                   | 7.86            | 1.1              |
| 1506          | 7/7/2011    | Pressure Tank Tap           | Valley               |                                                      | 515                             | < 26        | 73              | < .05       | < .001      | 4.2              | 0.014            | < .0002        | < 26         | 3                   | < 5.1             | 6.02            | 2.9              |
| 1507          | 5/21/2010   |                             | Valley               |                                                      |                                 |             |                 | < .05       |             | 7.3              | < .025           |                | 0.19         |                     |                   |                 |                  |
| 1508          | 7/14/2011   | Outdoor Spigot              | Upland               |                                                      | 4.87                            | < 26        | 140             | < .05       | < .001      | 7.9              | < .0005          | < .0002        | < 26         | 0.85                |                   | 7.28            | 1.3              |
| 1509          | 7/16/2011   | Pressure Tank               | Valley               |                                                      | 1.47                            | < 26        | 73              | 1.8         | 0.0086      | 6.2              | 0.13             | < .0002        | 60.1         | < .05               |                   | 8.43            | 1.4              |
| 1510          | 5/22/2010   | Spare Well                  | Upland               |                                                      | 4.02                            |             |                 | < .05       |             | 2.56             | < .025           |                | 0.47         |                     |                   | 7.63            |                  |
| 1511          | 5/22/2010   | Kitchen Sink                | Upland               |                                                      | 4.97                            |             |                 | < .05       |             | 5.91             | < .025           |                | < .1         |                     |                   | 7.29            |                  |
| 1512          | 7/18/2011   | Outside Hose Bib            | Upland               |                                                      | 4.31                            | < 26        | 110             | 0.62        | 0.0061      | 5                | 0.91             | < .0002        | < 26         | 1.1                 |                   | 7.37            | 1.1              |
| 1513          | 7/18/2011   | Hydrant Northwest Of Well   | Upland               |                                                      | 2.3                             | < 26        | 150             | < .05       | < .001      | 6.4              | 0.018            | < .0002        | < 26         | 0.49                |                   | 7.47            | 2.8              |
| 1514          | 7/18/2011   |                             | Valley               | Yes                                                  |                                 | < 26        | 93              | < .05       | < .001      | 3.6              | 0.0015           | < .0002        | < 26         | 0.38                | < 4.7             |                 | 0.75             |
| 1515          | 5/16/2011   | Pressure Tank               | Upland               |                                                      |                                 | < 26        | 97              | < 0.05      | < 0.001     | 7.1              | 0.01             | < 0.0002       | < 26         | 0.14                | < 5.1             |                 | 0.84             |
| 1516          | 5/16/2011   | Slop Sink In Barn           | Upland               |                                                      | 1.99                            | < 26        | 80              | < .05       | < .001      | 7.4              | < .0005          | < .0002        | < 26         | 1.5                 |                   | 7.21            | 0.93             |
| 1517          | 5/16/2011   | Pressure Tank               | Upland               |                                                      | 1.87                            | < 26        | 130             | 0.29        | < .001      | 13               | 0.023            | < .0002        | < 26         | < .05               |                   | 7.43            | 1.1              |
| 1518          | 5/16/2011   | Outdoor Spigot              | Upland               |                                                      | 5.75                            | < 26        | 44              | 0.084       | < .001      | 2.8              | 0.0043           | < .0002        | < 26         | 0.3                 |                   | 6.38            | 0.75             |
| 1519          | 7/25/2011   | Kitchen Sink Cold Water Tap | Upland               |                                                      | 9.51                            | < 26        | 88              | 0.12        | 0.0019      | 4                | 0.055            | < .0002        | < 26         | 1                   |                   | 7.1             | 1.2              |
| 1520          | 5/17/2011   | Outside Spigot              | Upland               |                                                      | 2.94                            | < 26        | 120             | < .05       | 0.001       | 13               | 0.00087          | < .0002        | < 26         | 0.75                |                   | 7.39            | 1.1              |
| 1521          | 5/17/2011   | Kitchen Sink                | Valley               |                                                      | 2.4                             | < 26        | 67              | 0.11        | < .001      | 6                | 0.058            | < .0002        | 439          | < .05               |                   | 8.18            | 1.1              |

Table S.8. Groundwater Quality Data for 1701 "Pre-Drill" Water Well Samples from Susquehanna County, Pennsylvania

| Water Well ID | Sample Date | Sampling Port                     | Topographic Location | Gas Extraction Area (Within 1 km of Active Gas Well) | Dissolved Oxygen - Field (mg/L) | Ethane ug/L | Hardness (mg/L) | Iron (mg/L) | Lead (mg/L) | Magnesium (mg/L) | Manganese (mg/L) | Mercury (mg/L) | Methane ug/L | Nitrate as N (mg/L) | Oil Grease (mg/L) | pH - Field (SU) | Potassium (mg/L) |
|---------------|-------------|-----------------------------------|----------------------|------------------------------------------------------|---------------------------------|-------------|-----------------|-------------|-------------|------------------|------------------|----------------|--------------|---------------------|-------------------|-----------------|------------------|
| 1522          | 5/17/2011   | Kitchen Sink                      | Valley               |                                                      | 0.64                            | < 26        | 80              | 0.065       | < .001      | 7.2              | 0.044            | < .0002        | 32.9         | < .05               |                   | 7.95            | 1                |
| 1523          | 5/17/2011   | Outdoor Spigot                    | Upland               |                                                      | 3.86                            | < 26        | 89              | < .05       | < .001      | 8.1              | < .0005          | < .0002        | < 26         | 0.22                |                   | 7.3             | 1.1              |
| 1524          | 5/17/2011   | Garage Pressure Tank              | Upland               |                                                      | 2.97                            | < 26        | 93              | 0.09        | 0.0035      | 7.9              | 0.0022           | < .0002        | < 26         | 0.33                | < 4.8             | 7.27            | 0.91             |
| 1525          | 3/31/2010   | Spigot On Porch                   | Valley               |                                                      | 8.38                            |             |                 | < .05       |             | 1.8              | < .025           |                | 0.13         |                     |                   | 6.43            |                  |
| 1526          | 5/17/2011   | Pressure Tank Spigot              | Upland               |                                                      | 5.66                            | < 26        | 90              | < .05       | 0.0011      | 8.8              | < .0005          | < .0002        | < 26         | 0.37                |                   | 7.32            | 1.1              |
| 1527          | 3/31/2010   | Hydrant At Well Head              | Upland               |                                                      | 7.9                             | < .025      |                 | < .05       |             | 2.66             | < .025           |                | 0.36         |                     |                   | 7.15            |                  |
| 1528          | 8/4/2011    | Inside Faucet                     | Valley               |                                                      | 10.04                           | < 26        | 110             | < .05       | < .001      | 10               | < .0005          | < .0002        | < 26         | 0.76                |                   | 7.44            | 1.6              |
| 1529          | 8/9/2011    | Outside Faucet                    | Upland               |                                                      |                                 | <26         | 89              | <0.05       | <0.001      | 8.3              | <0.0005          | <0.0002        | <26          | 1.1                 | <4.7              |                 | 1.2              |
| 1530          | 3/28/2010   | Prssure Tank At Fitzsimon'S House | Upland               |                                                      | 8.26                            |             |                 | < .05       |             | 3.26             | < .025           |                | 1.6          |                     |                   | 7.75            |                  |
| 1531          | 5/18/2011   | Kitchen Sink                      | Upland               |                                                      | 3.62                            | <26         | 95              | <0.05       | <0.001      | 9.5              | <0.005           | <0.0002        | <26          | 0.95                |                   | 7.4             | 1.1              |
| 1532          | 5/18/2011   | Kitchen Sink                      | Upland               |                                                      | 1.52                            | < 26        | 43              | < .05       | < .001      | 3.3              | 0.0022           | < .0002        | < 26         | 0.42                |                   | 8.45            | 1                |
| 1533          | 5/18/2011   | Kitchen Sink                      | Upland               |                                                      | 4.01                            | < 26        | 35              | 0.11        | < .001      | 2.2              | 0.065            | < .0002        | < 26         | 1.5                 |                   | 5.7             | 0.75             |
| 1534          | 5/18/2011   | Kitchen Sink                      | Upland               |                                                      | 3.63                            | <26         | 68              | 0.12        | <0.001      | 6.2              | 0.0026           | <0.0002        | <26          | 0.78                |                   | 7.4             | 1.2              |
| 1535          | 3/28/2010   | Pressure Tank In Furnace Room     | Upland               |                                                      | 10.95                           |             |                 | < .05       |             | 4.87             | < .025           |                | 0.15         |                     |                   | 7.01            |                  |
| 1536          | 5/19/2011   | Bathroom Sink Body Shop           | Valley               | Yes                                                  | 3.04                            | < 26        | 95              | < .05       | < .001      | 9.9              | 0.0016           | < .0002        | < 26         | 0.17                |                   | 7.49            | 1.3              |
| 1537          | 4/1/2010    | Pressure Tank                     | Upland               |                                                      |                                 |             |                 | < .05       |             | 3.36             | < .025           |                | 0.33         |                     |                   |                 |                  |
| 1538          | 5/24/2011   | Basement Pressure Tank            | Valley               |                                                      | 1.73                            | < 26        | 16              | < .05       | < .001      | 1.4              | 0.01             | < .0002        | 2200         | < .05               |                   | 9.7             | 1.2              |
| 1539          | 5/24/2011   | Kitchen Sink                      | Upland               |                                                      | 3.59                            | < 26        | 97              | < .05       | < .001      | 9.4              | 0.0017           | < .0002        | < 26         | 0.2                 |                   | 7.5             | 1.4              |
| 1540          | 4/5/2010    | Kitchen Sink                      | Upland               |                                                      |                                 |             |                 | 0.292       |             | 4.73             | < .025           |                | 0.73         |                     |                   |                 |                  |
| 1541          | 4/5/2010    | Kitchen Sink Father'S             | Upland               |                                                      |                                 |             |                 | 0.137       |             | 3.84             | 0.084            |                | 30           |                     |                   |                 |                  |

Table S.8. Groundwater Quality Data for 1701 "Pre-Drill" Water Well Samples from Susquehanna County, Pennsylvania

| Water Well ID | Sample Date | Sampling Port                             | Topographic Location | Gas Extraction Area (Within 1 km of Active Gas Well) | Dissolved Oxygen - Field (mg/L) | Ethane ug/L | Hardness (mg/L) | Iron (mg/L) | Lead (mg/L) | Magnesium (mg/L) | Manganese (mg/L) | Mercury (mg/L) | Methane ug/L | Nitrate as N (mg/L) | Oil Grease (mg/L) | pH - Field (SU) | Potassium (mg/L) |
|---------------|-------------|-------------------------------------------|----------------------|------------------------------------------------------|---------------------------------|-------------|-----------------|-------------|-------------|------------------|------------------|----------------|--------------|---------------------|-------------------|-----------------|------------------|
| 1542          | 5/24/2011   | Pressure Tank                             | Valley               | Yes                                                  | 0.18                            | < 26        | 140             | 1.4         | 0.0012      | 7.1              | 0.0043           | < .0002        | < 26         | 1.1                 |                   | 7.73            | 0.97             |
| 1543          | 4/1/2010    | Kitchen Sink                              | Upland               |                                                      |                                 |             |                 | < .05       |             | 2.32             | < .025           |                | 3.1          |                     |                   |                 |                  |
| 1544          | 4/1/2010    | Kitchen Sink                              | Upland               |                                                      | 13.24                           |             |                 | < .05       |             | 3.08             | < .025           |                | 0.16         |                     |                   | 6.35            |                  |
| 1545          | 6/1/2011    | Kitchen Sink                              | Upland               |                                                      | 1.42                            | < 26        | 130             | < .05       | < .001      | 6                | 0.025            | < .0002        | < 26         | 0.13                |                   | 6.3             | 1.8              |
| 1546          | 4/1/2010    | Kitchen Sink                              | Upland               |                                                      | 5.45                            | < .025      |                 | < .05       |             | 4.67             | < .025           |                | 1.1          |                     |                   | 6.81            |                  |
| 1547          | 6/2/2011    | Township Bldg Garage Slop Sink            | Valley               |                                                      | 1.73                            | < 26        | 98              | < .05       | 0.0031      | 5                | 0.083            | < .0002        | < 26         | < .05               |                   | 6.77            | 1.9              |
| 1548          | 6/3/2011    | Outside Spigot                            | Valley               |                                                      | 0.46                            | < 26        | 40              | < .05       | < .001      | 1.4              | 0.092            | < .0002        | 151          | < .05               |                   | 7.61            | 2.7              |
| 1549          | 6/3/2011    | Pressure Tank                             | Valley               | Yes                                                  |                                 | <26         | 130             | 0.25        | <0.001      | 8.4              | 0.0027           | <0.0002        | <26          | 0.57                | <5                |                 | 1.3              |
| 1550          | 6/9/2011    | Outside Spigot                            | Valley               | Yes                                                  | 2.69                            | < 26        | 110             | < .05       | < .001      | 5.6              | 0.00053          | < .0002        | < 26         | 1.3                 |                   | 7.35            | 1.2              |
| 1551          | 6/9/2011    | Kitchen Sink                              | Upland               |                                                      | 5.5                             | < 26        | 160             | < .05       | < .001      | 8.3              | 0.012            | < .0002        | < 26         | 0.62                |                   | 7.78            | 1.8              |
| 1552          | 6/10/2011   | Pressure Tank (Basement Back Left Closet) | Valley               | Yes                                                  | 4.72                            | < 26        | 100             | < .05       | < .001      | 4.8              | < .0005          | < .0002        | < 26         | 1.1                 | < 5.3             | 7.82            | 1.3              |
| 1553          | 6/10/2011   |                                           | Valley               |                                                      |                                 | <26         | 120             | 0.06        | <0.001      | 5                | 0.043            | <0.0002        | <26          | <0.05               | <4.8              |                 | 1.2              |
| 1554          | 3/28/2010   | Outside Spigot                            | Upland               |                                                      | 2.66                            | 0.21        |                 | < .05       |             | < 1              | 0.126            |                | 16000        |                     |                   | 7.02            |                  |
| 1555          | 4/9/2010    | Basement Pressure Tank                    | Upland               |                                                      | 10.32                           | < .025      |                 | < .05       |             | 3.28             | < .025           |                | 0.75         |                     |                   | 6.86            |                  |
| 1556          | 4/9/2010    | Kitchen Sink                              | Valley               | Yes                                                  | 10.87                           |             |                 | < .05       |             | 2.45             | < .025           |                | 0.52         |                     |                   | 6.06            |                  |
| 1557          | 4/9/2010    | Basement Pressure Tank                    | Valley               |                                                      | 3.21                            |             |                 | < .05       |             | 1.26             | < .025           |                | 1400         |                     |                   | 8.73            |                  |
| 1558          | 5/27/2010   | Garage Sink                               | Valley               |                                                      | 8.25                            |             |                 | < .05       |             | 4.85             | < .025           |                | 0.26         |                     |                   | 7.64            |                  |
| 1559          | 5/27/2010   |                                           | Upland               |                                                      |                                 |             |                 | < .05       |             | 5.8              | < .025           |                | 1.1          |                     |                   |                 |                  |
| 1560          | 5/27/2010   | Outside Spigot                            | Upland               |                                                      | 10.93                           |             |                 | < .05       |             | 1.21             | < .025           |                | 2.4          |                     |                   | 6.7             |                  |
| 1561          | 6/3/2010    | Main House Kitchen Sink                   | Upland               |                                                      |                                 |             |                 |             |             |                  |                  |                | < .1         |                     |                   |                 |                  |
| 1562          | 6/4/2010    | Outside Hydrant                           | Upland               |                                                      | 7.04                            |             |                 |             |             |                  |                  |                | < .1         |                     |                   | 7.05            |                  |
| 1563          | 6/4/2010    | Kitchen Sink                              | Upland               | Yes                                                  | 2.91                            |             |                 |             |             |                  |                  |                | 540          |                     |                   | 9.13            |                  |

Table S.8. Groundwater Quality Data for 1701 "Pre-Drill" Water Well Samples from Susquehanna County, Pennsylvania

| Water Well ID | Sample Date | Sampling Port    | Topographic Location | Gas Extraction Area (Within 1 km of Active Gas Well) | Dissolved Oxygen - Field (mg/L) | Ethane ug/L | Hardness (mg/L) | Iron (mg/L) | Lead (mg/L) | Magnesium (mg/L) | Manganese (mg/L) | Mercury (mg/L) | Methane ug/L | Nitrate as N (mg/L) | Oil Grease (mg/L) | pH - Field (SU) | Potassium (mg/L) |
|---------------|-------------|------------------|----------------------|------------------------------------------------------|---------------------------------|-------------|-----------------|-------------|-------------|------------------|------------------|----------------|--------------|---------------------|-------------------|-----------------|------------------|
| 1564          | 6/4/2010    | Kitchen Sink     | Upland               |                                                      |                                 |             |                 |             |             |                  |                  |                | < .1         |                     |                   |                 |                  |
| 1565          | 6/4/2010    | Kitchen Sink     | Valley               |                                                      | 3.83                            |             |                 |             |             |                  |                  |                | 0.11         |                     |                   | 7.13            |                  |
| 1566          | 6/13/2010   | Kitchen Sink     | Valley               |                                                      | 2.03                            |             |                 |             |             |                  |                  |                | 0.71         |                     |                   | 7.25            |                  |
| 1567          | 6/13/2010   | Hydrant On Well  | Valley               |                                                      | 3.57                            |             |                 |             |             |                  |                  |                | 5600         |                     |                   | 7.45            |                  |
| 1568          | 6/13/2010   | Kitchen Sink     | Valley               |                                                      | 8.04                            |             |                 |             |             |                  |                  |                | 0.21         |                     |                   | 7.24            |                  |
| 1569          | 6/13/2010   | Kitchen Sink     | Upland               |                                                      | 5.86                            |             |                 |             |             |                  |                  |                | 0.18         |                     |                   | 7.1             |                  |
| 1570          | 6/13/2010   |                  | Valley               |                                                      |                                 |             |                 |             |             |                  |                  |                | < .1         |                     |                   |                 |                  |
| 1571          | 6/13/2010   | Kitchen Sink     | Valley               |                                                      | 1.77                            | < .025      |                 |             |             |                  |                  |                | 99           |                     |                   | 7.88            |                  |
| 1572          | 6/12/2010   | Pressure Tank    | Upland               |                                                      | 6.81                            |             |                 |             |             |                  |                  |                | <0.1         |                     |                   | 6.8             |                  |
| 1573          | 6/7/2010    | Outside Spigot   | Upland               |                                                      | 9.25                            |             |                 |             |             |                  |                  |                | 1.1          |                     |                   | 6.81            |                  |
| 1574          | 6/7/2010    | Spring Pipe      | Upland               |                                                      | 15.03                           |             |                 |             |             |                  |                  |                | 0.13         |                     |                   | 7.62            |                  |
| 1575          | 6/7/2010    | Kitchen Sink     | Upland               |                                                      | 5.79                            |             |                 |             |             |                  |                  |                | 0.11         |                     |                   | 6.27            |                  |
| 1576          | 6/10/2010   | Pressure Tank    | Upland               |                                                      | 9.86                            | < .025      |                 | < .05       |             | 3.42             | < .025           |                | < .1         |                     |                   | 7.47            |                  |
| 1577          | 6/10/2010   | Kitchen Sink     | Upland               |                                                      | 5.36                            |             |                 |             |             |                  |                  |                | < .1         |                     |                   | 7.2             |                  |
| 1578          | 6/10/2010   | Pressure Tank    | Upland               |                                                      | 6.28                            |             |                 |             |             |                  |                  |                | 0.12         |                     |                   | 6.98            |                  |
| 1579          | 6/10/2010   | Kitchen Sink     | Upland               |                                                      | 2.74                            |             |                 |             |             |                  |                  |                | 220          |                     |                   | 8.47            |                  |
| 1580          | 6/10/2010   | Kitchen Sink     | Valley               |                                                      | 4.55                            |             |                 |             |             |                  |                  |                | 0.64         |                     |                   | 7.51            |                  |
| 1581          | 6/10/2010   |                  | Upland               |                                                      |                                 |             |                 |             |             |                  |                  |                | < .1         |                     |                   |                 |                  |
| 1582          | 6/10/2010   | Kitchen Sink     | Upland               |                                                      | 6.26                            |             |                 |             |             |                  |                  |                | < .1         |                     |                   | 6.92            |                  |
| 1583          | 3/25/2009   |                  | Valley               | Yes                                                  |                                 | <0.025      |                 | <0.025      |             | 1.27             | <0.025           |                | 0.16         |                     |                   |                 |                  |
| 1584          | 6/10/2010   | Kitchen Sink     | Upland               |                                                      | 7.99                            |             |                 |             |             |                  |                  |                | < .1         |                     |                   | 6.44            |                  |
| 1585          | 6/12/2010   | Pressure Tank    | Upland               |                                                      | 11.17                           |             |                 |             |             |                  |                  |                | 0.26         |                     |                   | 6.33            |                  |
| 1586          | 6/12/2010   | Kitchen Faucet   | Upland               |                                                      | 8.14                            |             |                 |             |             |                  |                  |                | < .1         |                     |                   | 6.75            |                  |
| 1587          | 6/12/2010   | Bathroom Faucet  | Valley               |                                                      | 2.93                            |             |                 |             |             |                  |                  |                | 0.52         |                     |                   | 7.23            |                  |
| 1588          | 6/14/2010   | At Pressure Tank | Valley               |                                                      |                                 |             |                 |             |             |                  |                  |                | 0.11         |                     |                   |                 |                  |
| 1589          | 6/14/2010   | Kitchen Sink     | Upland               |                                                      | 4                               |             |                 |             |             |                  |                  |                | 0.11         |                     |                   | 7.24            |                  |
| 1590          | 4/4/2009    |                  | Valley               |                                                      |                                 | < .025      |                 | < .025      |             | 1.72             | < .025           |                | 0.43         |                     |                   |                 |                  |
| 1591          | 6/2/2011    | Dug Well         | Upland               | Yes                                                  | 8.7                             | <26         | 49              | <0.05       | <0.001      | 2.2              | 0.0036           | <0.0002        | <26          | 4.4                 |                   | 6.01            | 0.76             |

Table S.8. Groundwater Quality Data for 1701 "Pre-Drill" Water Well Samples from Susquehanna County, Pennsylvania

| Water Well ID | Sample Date | Sampling Port     | Topographic Location | Gas Extraction Area (Within 1 km of Active Gas Well) | Dissolved Oxygen - Field (mg/L) | Ethane ug/L | Hardness (mg/L) | Iron (mg/L) | Lead (mg/L) | Magnesium (mg/L) | Manganese (mg/L) | Mercury (mg/L) | Methane ug/L | Nitrate as N (mg/L) | Oil Grease (mg/L) | pH - Field (SU) | Potassium (mg/L) |
|---------------|-------------|-------------------|----------------------|------------------------------------------------------|---------------------------------|-------------|-----------------|-------------|-------------|------------------|------------------|----------------|--------------|---------------------|-------------------|-----------------|------------------|
| 1592          | 3/4/2009    |                   | Valley               |                                                      |                                 | 0.034       |                 | < .025      |             | 4.6              | < .025           |                | 0.21         |                     |                   |                 |                  |
| 1593          | 4/19/2009   |                   | Upland               |                                                      |                                 | < .025      |                 | < .025      |             | 7.38             | < .025           |                | 2.7          |                     |                   |                 |                  |
| 1594          | 9/1/2009    |                   | Upland               | Yes                                                  |                                 | 0.1         |                 | < .025      |             | 7.14             | < .025           |                | 2.3          |                     |                   |                 |                  |
| 1595          | 7/19/2011   |                   | Upland               |                                                      |                                 |             |                 |             |             |                  |                  |                | 0.19         |                     |                   |                 |                  |
| 1596          | 2/20/2009   | Barn Sink         | Valley               |                                                      | 5.54                            | 2.2         |                 | 0.074       |             | 5.63             | 0.081            |                | 1900         |                     | <5.0              | 7.88            |                  |
| 1597          | 2/26/2009   | Barn Sink         | Upland               |                                                      | 4.69                            | <0.025      |                 | <0.025      |             | 6.14             | <0.025           |                | 1.1          |                     | <5                | 7.59            |                  |
| 1598          | 11/9/2009   | Pressure Tank     | Valley               | Yes                                                  | 5.93                            | < .025      |                 | 0.081       |             | 3.25             | 0.04             |                | 4.2          |                     |                   | 8.16            |                  |
| 1599          | 12/6/2009   | Kitchen Faucet    | Upland               |                                                      | 6.07                            | < .025      |                 | < .05       |             | 3.66             | < .025           |                | 1.3          |                     |                   | 6.38            |                  |
| 1600          | 12/6/2009   | Kitchen Faucet    | Valley               | Yes                                                  | 8.23                            | < .025      |                 | < .05       |             | 2.21             | < .025           |                | 0.63         |                     |                   | 6.4             |                  |
| 1601          | 12/6/2009   | Pressure Tank     | Valley               | Yes                                                  | 11.43                           | < .025      |                 | < .05       |             | 2.35             | < .025           |                | 0.85         |                     |                   | 6.39            |                  |
| 1602          | 12/6/2009   | Kitchen Faucet    | Upland               |                                                      | 4.53                            | < .025      |                 | < .05       |             | 10.1             | < .025           |                | 0.76         |                     |                   | 6.88            |                  |
| 1603          | 12/15/2009  | Kitchen Sink      | Upland               |                                                      | 9.43                            | <0.025      |                 | <0.05       |             | 2.33             | <0.025           |                | 0.34         |                     |                   | 6.57            |                  |
| 1604          | 12/17/2009  | Pressure Tank     | Upland               |                                                      | 4.33                            | < .025      |                 | < .05       |             | 5.06             | < .025           |                | 0.67         |                     |                   | 7.48            |                  |
| 1605          | 1/11/2010   | Pressure Tank     | Upland               |                                                      | 8.85                            | < .025      |                 | < .05       |             | 3.19             | < .025           |                | 2            |                     |                   | 6.92            |                  |
| 1606          | 1/11/2010   | Kitchen Faucet    | Upland               |                                                      | 6.72                            | 0.04        |                 | < .05       |             | 5.83             | < .025           |                | 0.9          |                     |                   | 7.46            |                  |
| 1607          | 1/11/2010   | Kitchen Sink      | Upland               |                                                      | 8.12                            | <0.025      |                 | 0.653       |             | 2.8              | <0.025           |                | 0.29         |                     |                   | 7.02            |                  |
| 1608          | 1/11/2010   | Pressure Tank     | Upland               |                                                      | 8.69                            | 0.075       |                 | < .05       |             | 2.74             | < .025           |                | 2.3          |                     |                   | 6.74            |                  |
| 1609          | 1/11/2010   | Pressure Tank     | Upland               |                                                      | 2.76                            | < .025      |                 | < .05       |             | 7.66             | 0.154            |                | 3.3          |                     |                   | 7.62            |                  |
| 1610          | 1/11/2010   | Pressure Tank     | Upland               |                                                      | 5.81                            | < .025      |                 | 0.102       |             | 7.06             | 0.43             |                | 34           |                     |                   | 7.7             |                  |
| 1611          | 1/12/2010   | Spigot Into House | Upland               | Yes                                                  | 9.7                             | <0.025      |                 | 1.5         |             | 3.72             | 0.609            |                | 0.17         |                     |                   | 7.09            |                  |
| 1612          | 1/16/2010   | Pressure Tank     | Upland               |                                                      | 4.9                             | < .025      |                 | < .05       |             | 5.26             | < .025           |                | 5.7          |                     |                   | 7.91            |                  |
| 1613          | 1/21/2010   | Kitchen Sink      | Upland               | Yes                                                  | 3.97                            | <0.025      |                 | <0.05       |             | 4.76             | <0.025           |                | 0.52         |                     |                   | 7.69            |                  |
| 1614          | 2/4/2010    | Pressure Tank     | Valley               |                                                      | 5.93                            | <0.025      |                 | 0.158       |             | 5.62             | <0.025           |                | 0.17         |                     |                   | 7.01            |                  |
| 1615          | 2/4/2010    | Kitchen Sink      | Upland               |                                                      | 9.92                            | <0.025      |                 | <0.05       |             | 2.26             | <0.025           |                | <0.1         |                     |                   | 7.31            |                  |
| 1616          | 2/6/2010    | Kitchen Sink      | Valley               |                                                      | 7.25                            | <0.025      |                 | <0.05       |             | 7.39             | <0.025           |                | 0.18         |                     |                   | 7.52            |                  |
| 1617          | 2/15/2010   | Kitchen Sink      | Valley               |                                                      | 6.2                             | <0.025      |                 |             |             | 8.11             | <0.025           |                | <0.1         |                     |                   | 7.54            |                  |
| 1618          | 2/15/2010   | Kitchen Sink      | Valley               |                                                      | 7.89                            | <0.025      |                 |             |             | 7.62             | <0.025           |                | <0.1         |                     |                   | 7.66            |                  |
| 1619          | 2/18/2010   | Bathroom Sink     | Valley               | Yes                                                  | 10.69                           | 0.034       |                 | 10.1        |             | 7.02             | 0.851            |                | 1            |                     |                   | 7.06            |                  |



Table S.8. Groundwater Quality Data for 1701 "Pre-Drill" Water Well Samples from Susquehanna County, Pennsylvania

| Water Well ID | Sample Date | Sampling Port       | Topographic Location | Gas Extraction Area (Within 1 km of Active Gas Well) | Dissolved Oxygen - Field (mg/L) | Ethane ug/L | Hardness (mg/L) | Iron (mg/L) | Lead (mg/L) | Magnesium (mg/L) | Manganese (mg/L) | Mercury (mg/L) | Methane ug/L | Nitrate as N (mg/L) | Oil Grease (mg/L) | pH - Field (SU) | Potassium (mg/L) |
|---------------|-------------|---------------------|----------------------|------------------------------------------------------|---------------------------------|-------------|-----------------|-------------|-------------|------------------|------------------|----------------|--------------|---------------------|-------------------|-----------------|------------------|
| 1620          | 2/22/2010   | Kitchen Faucet      | Upland               |                                                      | 5.03                            | < .025      |                 | < .05       |             | 10.4             | 0.207            |                | 4.8          |                     |                   | 7.39            |                  |
| 1621          | 2/27/2010   | Kitchen Sink        | Valley               |                                                      | 7.06                            | <0.025      |                 | <0.05       |             | 5.48             | <0.025           |                | 0.2          |                     |                   | 6.97            |                  |
| 1622          | 3/4/2010    | Bathroom Sink       | Upland               | Yes                                                  | 2.4                             | 0.19        |                 |             |             | <1               | <0.025           |                | 220          |                     |                   | 9.12            |                  |
| 1623          | 3/7/2010    | Pressure Tank       | Upland               |                                                      | 10.56                           | 0.03        |                 | < .05       |             | 2.92             | < .025           |                | 0.78         |                     |                   | 6.44            |                  |
| 1624          | 3/28/2010   | Kitchen Faucet      | Upland               |                                                      | 2.2                             | 17          |                 | < .05       |             | 1.95             | < .025           |                | 32000        |                     |                   | 7.76            |                  |
| 1625          | 4/8/2010    | Outside Faucet      | Upland               |                                                      | 5.74                            | < .025      |                 | < .05       |             | 5.43             | < .025           |                | 3.7          |                     |                   | 7.3             |                  |
| 1626          | 4/9/2010    | Kitchen Sink        | Valley               |                                                      | 6.9                             | <0.025      |                 | <0.05       |             | 6.58             | <0.025           |                | 0.19         |                     |                   | 6.83            |                  |
| 1627          | 4/10/2010   | Kitchen Sink        | Valley               |                                                      | 3.1                             | <0.025      |                 | <0.05       |             | 8.76             | <0.025           |                | 0.34         |                     |                   | 7.44            |                  |
| 1628          | 4/10/2010   | Pressure Tank       | Valley               |                                                      | 5.72                            | 0.36        |                 | <0.05       |             | 3.25             | <0.025           |                | 3500         |                     |                   | 8.47            |                  |
| 1629          | 4/19/2010   | Kitchen Sink        | Valley               |                                                      | 3.08                            | <0.025      |                 | <0.05       |             | 7.24             | 0.077            |                | 1.6          |                     |                   | 7.44            |                  |
| 1630          | 4/22/2010   | Kitchen Sink        | Valley               |                                                      | 3.48                            | <0.025      |                 | <0.05       |             | 12.6             | <0.025           |                | 0.16         |                     |                   | 7.45            |                  |
| 1631          | 4/22/2010   | Kitchen Sink        | Valley               |                                                      | 4.42                            | 0.21        |                 | <0.050      |             | 12.4             | <0.025           |                | 12           |                     |                   | 7.53            |                  |
| 1632          | 4/22/2010   | Stepmother' S House | Valley               |                                                      | 3.55                            | <0.025      |                 | <0.05       |             | 12.3             | <0.025           |                | 16           |                     |                   | 7.46            |                  |
| 1633          | 4/24/2010   | Kitchen Faucet      | Upland               | Yes                                                  | 6.03                            | < .025      |                 | < .05       |             | 5.82             | < .025           |                | 1.4          |                     |                   | 7.27            |                  |
| 1634          | 4/22/2010   | Outside Faucet      | Valley               |                                                      | 5.95                            | < .025      |                 | < .05       |             | 11               | 0.322            |                | 22           |                     |                   | 7.31            |                  |
| 1635          | 5/1/2010    | Kitchen Faucet      | Valley               | Yes                                                  | 4.03                            | < .025      |                 |             |             | 9.04             | 0.171            |                | 11           |                     |                   | 7.24            |                  |
| 1636          | 5/1/2010    | Kitchen Sink        | Upland               |                                                      | 2.51                            | <0.025      |                 | <0.05       |             | 9.11             | <0.025           |                | 18           |                     |                   | 7.33            |                  |
| 1637          | 5/21/2010   | Pressure Tank       | Valley               |                                                      | 3.43                            | < .025      |                 | < .05       |             | 4.78             | < .025           |                | 620          |                     |                   | 6.94            |                  |
| 1638          | 6/3/2010    | Kitchen Faucet      | Upland               |                                                      | 9.18                            | < .025      |                 | < .05       |             | 3.22             | < .025           |                | < 1          |                     |                   | 6.9             |                  |
| 1639          | 6/7/2010    | Outside Spigot      | Upland               |                                                      | 10.31                           | <0.025      |                 | <0.05       |             | 4.72             | <0.025           |                | 0.35         |                     |                   | 7.65            |                  |
| 1640          | 6/12/2010   | Spigot In Garage    | Valley               |                                                      |                                 | <0.025      |                 |             |             | 2.05             | <0.025           |                | <0.1         |                     |                   |                 |                  |
| 1641          | 6/13/2010   | Kitchen Sink        | Valley               |                                                      | 3.37                            | <0.025      |                 | <0.05       |             | 7.56             | <0.025           |                | 0.31         |                     |                   | 7.2             |                  |
| 1642          | 6/13/2010   | Kitchen Sink        | Valley               |                                                      | 2.97                            | 0.53        |                 |             |             |                  |                  |                | 2500         |                     |                   | 8.76            |                  |
| 1643          | 6/23/2010   | Kitchen Faucet      | Upland               |                                                      | 3.83                            | < .025      |                 | < .05       |             | 4.37             | < .025           |                | 5            |                     |                   | 7.57            |                  |
| 1644          | 7/1/2010    | Kitchen Faucet      | Valley               |                                                      | 2.31                            | < .025      |                 | < .05       |             | 8.83             | < .025           |                | 0.42         |                     |                   | 7.15            |                  |

Table S.8. Groundwater Quality Data for 1701 "Pre-Drill" Water Well Samples from Susquehanna County, Pennsylvania

| Water Well ID | Sample Date | Sampling Port              | Topographic Location | Gas Extraction Area (Within 1 km of Active Gas Well) | Dissolved Oxygen - Field (mg/L) | Ethane ug/L | Hardness (mg/L) | Iron (mg/L) | Lead (mg/L) | Magnesium (mg/L) | Manganese (mg/L) | Mercury (mg/L) | Methane ug/L | Nitrate as N (mg/L) | Oil Grease (mg/L) | pH - Field (SU) | Potassium (mg/L) |
|---------------|-------------|----------------------------|----------------------|------------------------------------------------------|---------------------------------|-------------|-----------------|-------------|-------------|------------------|------------------|----------------|--------------|---------------------|-------------------|-----------------|------------------|
| 1645          | 7/2/2010    | Kitchen Sink               | Valley               |                                                      | 4.7                             | <0.025      |                 |             |             |                  |                  |                | 0.19         |                     |                   | 7.3             |                  |
| 1646          | 7/6/2010    | Kitchen Faucet             | Valley               |                                                      | 6.57                            | < .025      |                 | < .05       |             | 3.14             | < .025           |                | 0.12         |                     |                   | 7.68            |                  |
| 1647          | 7/6/2010    | Kitchen Sink               | Upland               |                                                      | 5.25                            | <0.025      |                 | <0.050      |             | 6.37             | <0.025           |                | <0.100       |                     |                   | 7.53            |                  |
| 1648          | 7/6/2010    | Pressure Tank              | Upland               |                                                      | 4.76                            | <0.025      |                 | <0.05       |             | 8.88             | <0.025           |                | 0.32         |                     |                   | 6.34            |                  |
| 1649          | 7/7/2010    | Kitchen Sink               | Upland               |                                                      | 3.6                             | <0.025      |                 |             |             | 6.2              | <0.025           |                | 0.24         |                     |                   | 6.06            |                  |
| 1650          | 7/7/2010    | Kitchen Faucet             | Valley               |                                                      | 7.61                            | < .025      |                 | < .05       |             | 7.01             | < .025           |                | 3.4          |                     |                   | 7.59            |                  |
| 1651          | 7/7/2010    | Pressure Tank              | Valley               |                                                      | 5.47                            | <0.025      |                 |             |             |                  |                  |                | 0.19         |                     |                   | 7.39            |                  |
| 1652          | 7/8/2010    | Kitchen Sink               | Upland               |                                                      | 9.2                             | <0.025      |                 | <0.05       |             | 7.86             | <0.025           |                | 0.11         |                     |                   | 7.93            |                  |
| 1653          | 7/9/2010    | Pressure Tank              | Valley               |                                                      | 5.76                            | 0.034       |                 | 0.494       |             | 4.88             | 0.045            |                | 190          |                     |                   | 6.69            |                  |
| 1654          | 7/2/2010    | Kitchen Faucet             | Valley               |                                                      | 7.09                            | < .025      |                 | < .05       |             | 5.93             | 0.051            |                | 70           |                     |                   | 7.69            |                  |
| 1655          | 7/9/2010    | Outside Spigot             | Valley               |                                                      | 1.67                            | <0.025      |                 | <0.05       |             | 5.03             | 0.026            |                | 0.13         |                     |                   | 7.95            |                  |
| 1656          | 7/9/2010    | Kitchen Sink               | Valley               |                                                      | 2.54                            | <0.025      |                 | <0.05       |             | 4.68             | <0.025           |                | <0.1         |                     |                   | 8.02            |                  |
| 1657          | 7/7/2010    | Kitchen Faucet             | Upland               | Yes                                                  | 2.55                            | 0.16        |                 | < .05       |             | 4.18             | < .025           |                | 470          |                     |                   | 6.55            |                  |
| 1658          | 7/7/2010    | Kitchen Sink               | Upland               |                                                      | 3.74                            | <0.025      |                 | <0.05       |             | 5.08             | <0.025           |                | <0.100       |                     |                   | 7.78            |                  |
| 1659          | 7/8/2010    | Kitchen Faucet             | Valley               |                                                      | 4.67                            | < .025      |                 | 0.083       |             | 7.03             | < .025           |                | 0.81         |                     |                   | 7.71            |                  |
| 1660          | 7/8/2010    | Kitchen Sink               | Upland               |                                                      | 6.1                             | <0.025      |                 | <0.050      |             | 2.57             | <0.025           |                | <0.100       |                     |                   | 4.9             |                  |
| 1661          | 7/10/2010   | Pressure Tank              | Upland               |                                                      | 8.11                            | < .025      |                 | < .05       |             | 5.18             | < .025           |                | 1.2          |                     |                   | 6.89            |                  |
| 1662          | 7/10/2010   | Basement Spigot Pre-Filter | Valley               |                                                      | 1.07                            | 0.028       |                 | <0.05       |             | 6.03             | 0.57             |                | 51           |                     |                   | 7.68            |                  |
| 1663          | 7/10/2010   | Kitchen Faucet             | Upland               |                                                      | 1                               | < .025      |                 | < .05       |             | 1.21             | 0.757            |                | 610          |                     |                   | 6.2             |                  |
| 1664          | 7/10/2010   | Pressure Tank              | Upland               |                                                      | 7.14                            | <0.025      |                 | <0.05       |             | 5.64             | <0.025           |                | 0.37         |                     |                   | 6.94            |                  |
| 1665          | 7/11/2010   | Kitchen Faucet             | Upland               |                                                      | 1.66                            | < .025      |                 | < .05       |             | 5.15             | 0.134            |                | 39           |                     |                   | 8.23            |                  |
| 1666          | 7/12/2010   | Kitchen Faucet             | Valley               |                                                      | 2.88                            | 0.1         |                 | < .05       |             | 7.28             | 0.137            |                | 540          |                     |                   | 7.06            |                  |
| 1667          | 7/13/2010   | Basement (Pre-Filter)      | Valley               | Yes                                                  | 1.49                            | < .025      |                 | < .05       |             | 3.65             | < .025           |                | 56           |                     |                   | 7.72            |                  |
| 1668          | 7/13/2010   | Kitchen Sink               | Valley               |                                                      | 3.44                            | <0.025      |                 |             |             | 2.68             | <0.025           |                | 0.14         |                     |                   | 6.33            |                  |
| 1669          | 7/13/2010   | Deep Well                  | Valley               |                                                      | 0.82                            | 15          |                 | < .05       |             | 6.81             | 0.257            |                | 19000        |                     |                   | 7.84            |                  |

Table S.8. Groundwater Quality Data for 1701 "Pre-Drill" Water Well Samples from Susquehanna County, Pennsylvania

| Water Well ID | Sample Date | Sampling Port   | Topographic Location | Gas Extraction Area (Within 1 km of Active Gas Well) | Dissolved Oxygen - Field (mg/L) | Ethane ug/L | Hardness (mg/L) | Iron (mg/L) | Lead (mg/L) | Magnesium (mg/L) | Manganese (mg/L) | Mercury (mg/L) | Methane ug/L | Nitrate as N (mg/L) | Oil Grease (mg/L) | pH - Field (SU) | Potassium (mg/L) |
|---------------|-------------|-----------------|----------------------|------------------------------------------------------|---------------------------------|-------------|-----------------|-------------|-------------|------------------|------------------|----------------|--------------|---------------------|-------------------|-----------------|------------------|
| 1670          | 7/28/2010   | Kitchen Faucet  | Valley               |                                                      | 4.63                            | < .025      |                 | 0.065       |             | 8.21             | 0.031            |                | 1.3          |                     |                   | 7.53            |                  |
| 1671          | 7/28/2010   | Milkhouse Sink  | Upland               | Yes                                                  | 4.35                            | <0.025      |                 | <0.05       |             | 6.46             | <0.025           |                | 0.32         |                     |                   | 7.01            |                  |
| 1672          | 8/7/2010    | Kitchen Sink    | Upland               |                                                      | 5.84                            | <0.025      |                 | <0.05       |             | 11.3             | <0.025           |                | 0.13         |                     |                   | 6.82            |                  |
| 1673          | 8/8/2010    | Kitchen Sink    | Upland               |                                                      | 9.57                            | <0.025      |                 | <0.05       |             | 6.52             | <0.025           |                | 0.094        |                     |                   | 7.58            |                  |
| 1674          | 8/13/2010   | Outside Hydrant | Valley               |                                                      | 1.73                            | < .025      |                 | 0.392       |             | 9.66             | 0.507            |                | 34           |                     |                   | 7.19            |                  |
| 1675          | 8/19/2010   | Kitchen Faucet  | Valley               | Yes                                                  | 2.51                            | < .025      | 47.8507         |             |             |                  |                  |                | 1.4          | < 1                 |                   | 6.08            |                  |
| 1676          | 9/23/2010   | Outside Spigot  | Upland               |                                                      | 7.85                            | 0.96        | 82.19664        | <0.05       | <0.001      | 4.68             | <0.025           | 0              | 3600         | <1                  | <5                | 7.04            | 2.18             |
| 1677          | 10/10/2010  |                 | Valley               | Yes                                                  | 4.54                            | <0.025      | 72.5976         | 0.079       | 0.006       | 4.35             | <0.025           | 0              | 1.5          | <1                  | <5                | 5.78            | 1.4              |
| 1678          | 10/18/2010  | Kitchen Sink    | Valley               | Yes                                                  | 5.57                            | <0.025      | 128.0426        |             | <0.001      |                  |                  | <0.0002        | 0.2          | <1                  | <5                | 6.92            | 1.21             |
| 1679          | 10/18/2010  | Kitchen Faucet  | Upland               | Yes                                                  | 2.96                            | < .025      | 168.2249        |             |             |                  |                  |                | 4.8          | < 1                 | < 5               | 6.75            |                  |
| 1680          | 10/19/2010  | Kitchen Faucet  | Valley               | Yes                                                  | 4.03                            | 0.019       | 61.84626        |             |             |                  |                  |                | 0.42         | < 1                 | < 5               | 5.87            |                  |
| 1681          | 10/26/2010  | Spring House    | Valley               | Yes                                                  | 8.63                            | <0.025      | 59.89508        |             | <0.001      |                  |                  | <0.0002        | 0.37         |                     | <5                | 6.02            | 0.99             |
| 1682          | 10/29/2010  | Kitchen Faucet  | Upland               |                                                      | 5.32                            | <0.025      | 132.526         | <0.05       | <0.001      | 7.2              | <0.025           | 0              | 0.12         | <1                  | <5                | 7.09            | 1.08             |
| 1683          | 10/29/2010  | Kitchen Faucet  | Upland               |                                                      | 3.04                            | <0.025      | 173.7302        | <0.05       | <0.001      | 9.02             | <0.025           | 0              | <0.1         | <1                  | <5                | 6.69            | 1.23             |
| 1684          | 11/11/2010  | Kitchen Faucet  | Valley               | Yes                                                  | 3.91                            | < .025      | 171.769         |             |             |                  |                  |                | 1.1          | < 1                 | < 5               | 6.83            |                  |
| 1685          | 11/11/2010  | Kitchen Faucet  | Upland               |                                                      | 2.77                            | 0.11        | 51.9466         |             |             |                  |                  |                | 290          | < 1                 | < 5               | 7.6             |                  |
| 1686          | 11/11/2010  | Kitchen Faucet  | Upland               | Yes                                                  | 6.4                             | <0.025      | 141.0862        | <0.05       | <0.0003     | 9.4              | 0.0025           | <0.002         | 0.17         | <1                  | <5                | 7.28            | 1.38             |
| 1687          | 12/2/2010   | Kitchen Sink    | Valley               |                                                      | 4.5                             | <0.025      | 135.5074        |             | <0.001      | 6.59             | <0.025           | <0.0002        | 0.34         | <1                  | <5                | 7.54            | 1.14             |
| 1688          | 12/4/2010   | Kitchen Sink    | Valley               |                                                      | 9.88                            | <0.025      | 36.7763         | <0.05       | <0.001      | 2.2              | <0.025           | 0              | <0.1         | <1                  | <5                | 6.61            | 0.879            |
| 1689          | 12/5/2010   | Kitchen Faucet  | Valley               | Yes                                                  | 3.79                            | < .025      | 143.2799        |             |             |                  |                  |                | 19           | < 1                 | < 5               | 6.93            |                  |
| 1690          | 12/9/2010   | Kitchen Faucet  | Upland               |                                                      | 3.06                            | < .025      | 113.1812        |             |             |                  |                  |                | 0.61         | < 1                 | < 5               | 6.59            |                  |
| 1691          | 12/11/2010  | Kitchen Sink    | Valley               |                                                      | 8.67                            | <0.025      | 43.632          |             |             |                  |                  |                | <0.1         | <1                  | <5                | 6.27            |                  |
| 1692          | 12/14/2010  | Kitchen Sink    | Upland               | Yes                                                  | 9.51                            | <0.025      | 41.5468         | <0.05       | 0.002       | 1.6              | 0.0029           | 0              | 0.12         | <1                  | <5                | 6.85            | <1               |
| 1693          | 12/14/2010  | Kitchen Faucet  | Upland               | Yes                                                  | 3.14                            | <0.025      | 134.8829        |             | 0           |                  |                  | 0              | 0.77         | <1                  | <5                | 6.79            | 1.6              |
| 1694          | 12/18/2010  | Kitchen Faucet  | Valley               | Yes                                                  | 2.11                            | < .025      | 160.16          |             |             |                  |                  |                | 2.5          | < 1                 | < 5               | 6.83            |                  |

Table S.8. Groundwater Quality Data for 1701 "Pre-Drill" Water Well Samples from Susquehanna County, Pennsylvania

| Water Well ID | Sample Date | Sampling Port            | Topographic Location | Gas Extraction Area (Within 1 km of Active Gas Well) | Dissolved Oxygen - Field (mg/L) | Ethane ug/L | Hardness (mg/L) | Iron (mg/L) | Lead (mg/L) | Magnesium (mg/L) | Manganese (mg/L) | Mercury (mg/L) | Methane ug/L | Nitrate as N (mg/L) | Oil Grease (mg/L) | pH - Field (SU) | Potassium (mg/L) |
|---------------|-------------|--------------------------|----------------------|------------------------------------------------------|---------------------------------|-------------|-----------------|-------------|-------------|------------------|------------------|----------------|--------------|---------------------|-------------------|-----------------|------------------|
| 1695          | 10/29/2009  | Pressure Tank            | Upland               | Yes                                                  | 7.98                            | 0.2         |                 | < .05       |             | 9.9              | < .025           |                | 2.7          |                     |                   | 7.22            |                  |
| 1696          | 11/6/2010   | Kitchen Faucet           | Upland               |                                                      |                                 | <0.025      | 3.3075          | < .05       | < .0003     | < .5             | < .0025          | < .0002        | 0.61         | <1                  | <5                |                 | < .5             |
| 1697          | 3/19/2009   |                          | Upland               | Yes                                                  |                                 | < .025      |                 | < .05       |             | 7.03             | 0.03             |                | 0.49         |                     |                   |                 |                  |
| 1698          | 3/25/2009   |                          | Upland               |                                                      |                                 | <0.025      |                 | <0.05       |             | 1.79             | <0.025           |                | 0.25         |                     |                   |                 |                  |
| 1699          | 3/12/2009   |                          | Upland               |                                                      |                                 | <0.025      |                 | 0.109       |             | 5.24             | <0.025           |                | 0.52         |                     |                   |                 |                  |
| 1700          | 4/5/2010    | Kitchen Sink, Main House | Upland               |                                                      | 6.07                            | <0.025      |                 | <0.05       |             | 9.06             | <0.025           |                | 0.41         |                     |                   | 7.33            |                  |
| 1701          | 6/2/2011    |                          | Valley               |                                                      |                                 | < 26        | 110             | < .05       | < .05       | 4.5              | 0.033            | < .0002        | < 26         | < .05               |                   |                 | 2.2              |

Table S.8. Groundwater Quality Data for 1701 "Pre-Drill" Water Well Samples from Susquehanna County, Pennsylvania

| Water Well ID | Sample Date | Sampling Port                      | Topographic Location | Gas Extraction Area (Within 1 km of Active Gas Well) | Selenium (mg/L) | Silver (mg/L) | Sodium (mg/L) | Strontium (mg/L) | Sulfate (mg/L) | Sulfide (mg/L) | TDS (mg/L) | Thallium (mg/L) | TSS (mg/L) | Turbidity (NTU) | Vanadium (mg/L) |
|---------------|-------------|------------------------------------|----------------------|------------------------------------------------------|-----------------|---------------|---------------|------------------|----------------|----------------|------------|-----------------|------------|-----------------|-----------------|
| 1             | 6/3/2011    |                                    | Valley               |                                                      | <0.005          | <0.001        | 2.2           | 0.17             | 11             | <3             | 69         |                 | <4         | <0.85           |                 |
| 2             | 5/27/2010   | Pressure Tank                      | Valley               |                                                      |                 |               | 50.7          | 0.47             |                |                | 237        |                 |            | 18.3            |                 |
| 3             | 6/29/2011   |                                    | Upland               |                                                      | <0.005          | <0.001        | 7.7           | 0.17             | 12             | <3             | 140        |                 | <4         | <0.85           |                 |
| 4             | 6/29/2011   |                                    | Upland               |                                                      | < .005          | < .001        | 8.9           | 0.086            | < 1            | < 3            | 61         |                 | 9.2        | 8.9             |                 |
| 5             | 6/17/2010   | Outside Spigot                     | Upland               | Yes                                                  |                 |               |               |                  |                | < 1            |            |                 |            |                 |                 |
| 6             | 6/17/2010   | Kitchen Sink                       | Valley               |                                                      |                 |               |               |                  |                | < 1            |            |                 |            |                 |                 |
| 7             | 6/17/2010   | Kitchen Sink                       | Upland               |                                                      |                 |               |               |                  |                | < 1            |            |                 |            |                 |                 |
| 8             | 4/10/2010   | Pressure Tank                      | Upland               |                                                      |                 |               |               | 0.032            |                | 1              | 40         | < .002          | < 2        |                 | < .01           |
| 9             | 4/10/2010   | Basement At Pressure Tank          | Upland               |                                                      |                 |               |               | 0.209            |                | 1              | 95         | < .002          | < 2        |                 | < .01           |
| 10            | 4/10/2010   | Pressure Tank                      | Valley               |                                                      |                 |               |               | 0.177            |                | 3              | 60         | < .002          | < 2        |                 | < .01           |
| 11            | 4/11/2010   | Outside Hydrant Directly From Well | Upland               |                                                      |                 |               |               | 0.038            |                | < 1            | 90         | < .002          | 2.4        |                 | < .01           |
| 12            | 4/11/2010   |                                    | Valley               |                                                      |                 |               |               | 0.057            |                | < 1            | 75         | < .002          | < 2        |                 | < .01           |
| 13            | 4/11/2010   | Kitchen Sink                       | Valley               |                                                      |                 |               |               | 0.079            |                | 2              | 145        | < .002          | < 2        |                 | < .01           |
| 14            | 4/11/2010   | Kitchen Sink                       | Upland               | Yes                                                  |                 |               |               | 0.27             |                | < 1            | 105        | < .002          | < 2        |                 | < .01           |
| 15            | 4/11/2010   | Pressures Tank                     | Upland               |                                                      |                 |               |               | 0.065            |                | < 1            | 155        | < .002          | < 2        |                 | < .01           |
| 16            | 4/11/2010   | Kitchen Sink                       | Valley               |                                                      |                 |               |               | 0.786            |                | 5              | 155        | < .002          | < 2        |                 | < .01           |
| 17            | 4/11/2010   | Kitchen Sink                       | Upland               |                                                      |                 |               |               | 0.522            |                | < 1            | 125        | < .002          | 2.8        |                 | < .01           |
| 18            | 4/11/2010   | Outside Hydrant Direct From Well   | Upland               |                                                      |                 |               |               | 0.273            |                | 1              | 135        | < .002          | < 2        |                 | < .01           |
| 19            | 4/15/2010   | Outside Hydrant                    | Upland               |                                                      |                 |               |               | 0.227            |                | < 1            | 95         | < .002          | < 2        |                 | < .01           |
| 20            | 4/15/2010   | Kitchen Sink                       | Upland               |                                                      |                 |               |               | 0.354            |                | < 1            | 180        | < .002          | < 2        |                 | < .01           |
| 21            | 4/15/2010   | Outside Hydrant                    | Valley               |                                                      |                 |               |               | 0.077            |                | 1              | 160        | < .002          | 2.8        |                 | < .01           |
| 22            | 4/15/2010   | Pressure Tank                      | Valley               |                                                      |                 |               |               | 0.146            |                | < 1            | 75         | < .002          | < 2        |                 | < .01           |
| 23            | 4/19/2010   | Laundry Room Sink                  | Upland               |                                                      |                 |               |               | 0.17             |                | < 1            | 140        | < .002          | < 2        |                 | < .01           |

Table S.8. Groundwater Quality Data for 1701 "Pre-Drill" Water Well Samples from Susquehanna County, Pennsylvania

| Water Well ID | Sample Date | Sampling Port             | Topographic Location | Gas Extraction Area (Within 1 km of Active Gas Well) | Selenium (mg/L) | Silver (mg/L) | Sodium (mg/L) | Strontium (mg/L) | Sulfate (mg/L) | Sulfide (mg/L) | TDS (mg/L) | Thallium (mg/L) | TSS (mg/L) | Turbidity (NTU) | Vanadium (mg/L) |
|---------------|-------------|---------------------------|----------------------|------------------------------------------------------|-----------------|---------------|---------------|------------------|----------------|----------------|------------|-----------------|------------|-----------------|-----------------|
| 24            | 4/19/2010   | Hydrant At Well Head      | Valley               |                                                      |                 |               |               | 0.076            |                | 2              | 193        | < .002          | 9.6        |                 | < .01           |
| 25            | 4/19/2010   | Diversion Ditch           | Upland               | Yes                                                  |                 |               |               | 0.026            |                | 1              | 60         |                 | 8.4        | 2               |                 |
| 26            | 4/22/2010   | Kitchen Sink              | Valley               |                                                      |                 |               |               | 0.246            |                | 1              | 273        | < .002          | < 2        |                 | < .01           |
| 27            | 4/22/2010   | Kitchen Sink              | Upland               | Yes                                                  |                 |               |               | 0.374            |                | < 1            | 153        | < .002          | < 2        |                 | < .01           |
| 28            | 4/22/2010   | Basement Sink             | Upland               |                                                      |                 |               |               | 0.264            |                | 1              | 207        | < .002          | < 2        |                 | < .01           |
| 29            | 6/24/2010   | Pond                      | Upland               |                                                      |                 |               |               |                  |                | < 1            |            |                 |            |                 |                 |
| 30            | 6/24/2010   | Pressure Tank             | Upland               |                                                      |                 |               |               |                  |                |                |            |                 |            |                 |                 |
| 31            | 5/14/2011   |                           | Upland               |                                                      | < .005          | < .001        | 13            | 0.082            | 19             | < 3            | 410        |                 | < 4        | 6.5             |                 |
| 32            | 6/24/2010   | Kitchen Sink              | Valley               |                                                      |                 |               |               |                  |                | < 1            |            |                 |            |                 |                 |
| 33            | 6/24/2010   | Outside Spigot            | Upland               |                                                      |                 |               |               | 0.435            |                | < 1            | 100        | < .002          | < 2        |                 | < .01           |
| 34            | 4/25/2010   | Bathroom Faucet           | Upland               | Yes                                                  |                 |               |               | 0.112            |                | < 1            | 80         | < .002          | 3.2        |                 | < .01           |
| 35            | 4/25/2010   |                           | Upland               | Yes                                                  |                 |               |               | 0.311            |                | < 1            | 160        |                 | < 2        | < 1             |                 |
| 36            | 4/24/2010   | Outside Spigot            | Valley               |                                                      |                 |               |               | 0.477            |                | 1              | 507        | < .002          | 2.5        |                 | < .01           |
| 37            | 4/24/2010   | Kitchen Sink              | Upland               | Yes                                                  |                 |               |               | 0.025            |                | 5              | 120        | < .002          | < 2        |                 | < .01           |
| 38            | 4/24/2010   |                           | Upland               |                                                      |                 |               |               | 0.32             |                | 1              | 220        | < .002          | < 2        |                 | < .01           |
| 39            | 4/24/2010   | Kitchen Bar Sink          | Upland               |                                                      |                 |               |               | 0.253            |                | 1              | 313        | < .002          | < 2        |                 | < .01           |
| 40            | 4/24/2010   | Outside Spigot            | Upland               |                                                      |                 |               |               | 0.549            |                | < 1            | 127        | < .002          | < 2        |                 | < .01           |
| 41            | 4/24/2010   | Outside Spigot            | Upland               |                                                      |                 |               |               | 0.329            |                | < 1            | 193        | < .002          | < 2        |                 | < .01           |
| 42            | 4/29/2010   | Outside Spigot            | Upland               |                                                      |                 |               |               | 0.406            |                | < 1            | 100        | < .002          | < 2        |                 | < .01           |
| 43            | 4/29/2010   | Spring Culvert            | Upland               |                                                      |                 |               |               | < .025           |                | < 1            | 35         | < .002          | < 2        |                 | < .01           |
| 44            | 4/29/2010   | Basement At Pressure Tank | Valley               |                                                      |                 |               |               | 0.063            |                | < 1            | 100        | < .002          | < 2        |                 | < .01           |
| 45            | 7/2/2010    | Kitchen Sink              | Valley               |                                                      |                 |               |               |                  |                |                |            |                 |            |                 |                 |
| 46            | 7/2/2010    | Bathroom Sink             | Valley               |                                                      |                 |               |               |                  |                |                |            |                 |            |                 |                 |
| 47            | 7/2/2010    | Kitchen Sink              | Valley               |                                                      |                 |               |               |                  |                |                |            |                 |            |                 |                 |
| 48            | 7/2/2010    | Kitchen Sink              | Valley               |                                                      |                 |               |               |                  |                |                |            |                 |            |                 |                 |
| 49            | 7/2/2010    | Kitchen Sink              | Upland               |                                                      |                 |               |               |                  |                |                |            |                 |            |                 |                 |

Table S.8. Groundwater Quality Data for 1701 "Pre-Drill" Water Well Samples from Susquehanna County, Pennsylvania

| Water Well ID | Sample Date | Sampling Port                   | Topographic Location | Gas Extraction Area (Within 1 km of Active Gas Well) | Selenium (mg/L) | Silver (mg/L) | Sodium (mg/L) | Strontium (mg/L) | Sulfate (mg/L) | Sulfide (mg/L) | TDS (mg/L) | Thallium (mg/L) | TSS (mg/L) | Turbidity (NTU) | Vanadium (mg/L) |
|---------------|-------------|---------------------------------|----------------------|------------------------------------------------------|-----------------|---------------|---------------|------------------|----------------|----------------|------------|-----------------|------------|-----------------|-----------------|
| 50            | 7/2/2010    | Kitchen Sink                    | Upland               |                                                      |                 |               |               |                  |                |                |            |                 |            |                 |                 |
| 51            | 7/2/2010    | Kitchen Sink                    | Valley               |                                                      |                 |               |               |                  |                |                |            |                 |            |                 |                 |
| 52            | 7/6/2010    | Kitchen Sink                    | Upland               |                                                      |                 |               |               | 0.542            |                | < 1            | 150        | < .002          | < 2        |                 | < .01           |
| 53            | 7/6/2010    | Garage                          | Valley               |                                                      |                 |               |               | 0.435            |                | < 1            | 120        | < .002          | 3.5        |                 | < .01           |
| 54            | 7/6/2010    | Kitchen Sink                    | Valley               |                                                      |                 |               |               | 0.11             |                | < 1            | 100        | < .002          | < 2        |                 | < .01           |
| 55            | 7/6/2010    | Kitchen Sink                    | Upland               |                                                      |                 |               |               | 0.529            |                | < 1            | 150        | < .002          | < 2        |                 | < .01           |
| 56            | 7/6/2010    | Kitchen Sink                    | Valley               |                                                      |                 |               |               | 0.957            |                | 1              | 205        | < .002          | < 2        |                 | < .01           |
| 57            | 7/6/2010    |                                 | Valley               |                                                      |                 |               |               | 1.25             |                | < 1            | 100        | < .002          | 2          |                 | < .01           |
| 58            | 7/6/2010    | Kitchen Sink                    | Valley               |                                                      |                 |               |               | 0.451            |                | < 1            | 125        | < .002          | < 2        |                 | < .01           |
| 59            | 7/6/2010    | Basement At Pressure Tank       | Valley               |                                                      |                 |               |               | 0.11             |                | < 1            | 95         | < .002          | < 2        |                 | < .01           |
| 60            | 7/6/2010    |                                 | Upland               |                                                      |                 |               |               | 0.05             |                | < 1            | 120        | < .002          | < 2        |                 | < .01           |
| 61            | 7/7/2010    | Kitchen Sink                    | Valley               |                                                      |                 |               |               | 0.407            |                | < 1            | 170        | < .002          | < 2        |                 | < .01           |
| 62            | 7/7/2010    | Spring Head                     | Valley               |                                                      |                 |               |               | 0.038            |                | < 1            | 80         | < .002          | < 2        |                 | < .01           |
| 63            | 7/7/2010    | Kitchen Sink                    | Valley               |                                                      |                 |               |               | 0.045            |                | 1              | 135        | < .002          | < 2        |                 | < .01           |
| 64            | 7/7/2010    | Kitchen Sink                    | Valley               |                                                      |                 |               |               | 1.45             |                | < 1            | 135        | < .002          | 2          |                 | < .01           |
| 65            | 7/7/2010    | Kitchen Sink                    | Valley               |                                                      |                 |               |               | 0.141            |                | < 1            | 80         | < .002          | < 2        |                 | < .01           |
| 66            | 7/7/2010    | Basement Pressure Tank          | Valley               |                                                      |                 |               |               | 0.258            |                | < 1            | 90         | < .002          | < 2        |                 | < .01           |
| 67            | 7/7/2010    | Kitchen Sink                    | Valley               |                                                      |                 |               |               | 1.45             |                | < 1            | 145        | < .002          | < 2        |                 | < .01           |
| 68            | 7/8/2010    | Basement Sink                   | Valley               |                                                      |                 |               |               | 0.621            |                | < 1            | 135        | < .002          | < 2        |                 | < .01           |
| 69            | 7/8/2010    | Kitchen Sink                    | Upland               |                                                      |                 |               |               | 0.141            |                | < 1            | 120        | < .002          | < 2        |                 | < .01           |
| 70            | 7/8/2010    | Kitchen Sink                    | Valley               |                                                      |                 |               |               | 0.331            |                | < 1            | 160        | < .002          | < 2        |                 | < .01           |
| 71            | 7/9/2010    | Kitchen Sink                    | Valley               |                                                      |                 |               |               | 0.409            |                | < 1            | 165        | < .002          | < 2        |                 | < .01           |
| 72            | 7/9/2010    | Kitchen Sink - Debonis Property | Valley               |                                                      |                 |               |               | 0.083            |                | < 1            | 165        | < .002          | < 2        |                 | < .01           |
| 73            | 7/7/2010    | Kitchen Sink                    | Valley               |                                                      |                 |               |               | 0.665            |                | < 1            | 140        | < .002          | < 2        |                 | < .01           |
| 74            | 7/7/2010    | Outside Garage Spigot           | Valley               |                                                      |                 |               |               | 0.063            |                | < 1            | 90         | < .002          | < 2        |                 | < .01           |

Table S.8. Groundwater Quality Data for 1701 "Pre-Drill" Water Well Samples from Susquehanna County, Pennsylvania

| Water Well ID | Sample Date | Sampling Port | Topographic Location | Gas Extraction Area (Within 1 km of Active Gas Well) | Selenium (mg/L) | Silver (mg/L) | Sodium (mg/L) | Strontium (mg/L) | Sulfate (mg/L) | Sulfide (mg/L) | TDS (mg/L) | Thallium (mg/L) | TSS (mg/L) | Turbidity (NTU) | Vanadium (mg/L) |
|---------------|-------------|---------------|----------------------|------------------------------------------------------|-----------------|---------------|---------------|------------------|----------------|----------------|------------|-----------------|------------|-----------------|-----------------|
| 75            | 7/8/2010    | Kitchen Sink  | Valley               |                                                      |                 |               |               | 0.065            |                | < 1            | 180        | < .002          | < 2        |                 | < .01           |
| 76            | 7/7/2010    | Kitchen Sink  | Valley               |                                                      |                 |               |               | 0.94             |                | < 1            | 130        | < .002          | < 2        |                 | < .01           |
| 77            | 7/7/2010    | Kitchen Sink  | Valley               |                                                      |                 |               |               | 0.076            |                | < 1            | 45         | < .002          | < 2        |                 | < .01           |
| 78            | 7/8/2010    | Kitchen Sink  | Valley               |                                                      |                 |               |               | 0.418            |                | 5              | 100        | < .002          | 2.8        |                 | < .01           |
| 79            | 7/8/2010    | Kitchen Sink  | Upland               |                                                      |                 |               |               | 0.665            |                | < 1            | 140        | < .002          | < 2        |                 | < .01           |
| 80            | 7/8/2010    | Kitchen Sink  | Valley               |                                                      |                 |               |               | 0.405            |                | < 1            | 170        | < .002          | < 2        |                 | < .01           |
| 81            | 7/8/2010    | Kitchen Sink  | Valley               |                                                      |                 |               |               | 0.316            |                | < 1            | 135        | < .002          | < 2        |                 | < .01           |
| 82            | 7/9/2010    |               | Valley               | Yes                                                  |                 |               |               | 0.08             |                | < 1            | 145        | < .002          | < 2        |                 | < .01           |
| 83            | 7/9/2010    | Kitchen Sink  | Valley               |                                                      |                 |               |               | 0.076            |                | < 1            | 480        | < .002          | < 2        |                 | < .01           |
| 84            | 7/9/2010    | Kitchen Sink  | Valley               |                                                      |                 |               |               | 0.5              |                | < 1            | 130        | < .002          | < 2        |                 | < .01           |
| 85            | 7/9/2010    | Kitchen Sink  | Upland               |                                                      |                 |               |               | 0.239            |                | < 1            | 170        | < .002          | 2          |                 | < .01           |
| 86            | 7/9/2010    | Kitchen Sink  | Valley               |                                                      |                 |               |               | 1.9              |                | < 1            | 140        | < .002          | < 2        |                 | < .01           |
| 87            | 7/9/2010    |               | Valley               |                                                      |                 |               |               | 0.067            |                | < 1            | 55         | < .002          | 23.6       |                 | < .01           |
| 88            | 7/10/2010   |               | Valley               |                                                      |                 |               |               | 2.15             |                | 5              | 430        | < .002          | < 2        |                 | < .01           |
| 89            | 7/8/2010    | Pressure Tank | Upland               |                                                      |                 |               |               | 0.041            |                | < 1            | 65         | < .002          | < 2        |                 | < .01           |
| 90            | 5/20/2010   | Kitchen Sink  | Valley               |                                                      |                 |               |               | 0.095            |                | < 1            |            | < .002          |            |                 | < .01           |
| 91            | 7/11/2010   | Kitchen Sink  | Valley               |                                                      |                 |               |               | 0.284            |                | < 1            | 170        | < .002          | < 2        |                 | < .01           |
| 92            | 7/11/2010   | Barn Hose     | Valley               |                                                      |                 |               |               | 0.061            |                | <1             | 105        | <0.002          | 7.6        |                 | <0.01           |
| 93            | 7/8/2010    | Kitchen Sink  | Upland               | Yes                                                  |                 |               |               | 0.254            |                | < 1            | 110        | < .002          | < 2        |                 | < .01           |
| 94            | 4/8/2009    |               | Upland               |                                                      |                 |               |               | 0.299            |                | <1             | 68         |                 | <2         |                 |                 |
| 95            | 7/9/2010    |               | Valley               |                                                      |                 |               |               | 0.678            |                | < 1            | 130        | < .002          | < 2        |                 | < .01           |
| 96            | 7/10/2010   | Kitchen Sink  | Valley               |                                                      |                 |               |               | 0.666            |                | < 1            | 165        | < .002          | < 2        |                 | < .01           |
| 97            | 7/10/2010   | Kitchen Sink  | Upland               |                                                      |                 |               |               | < .025           |                | < 1            | 65         | < .002          | 4          |                 | < .01           |
| 98            | 7/12/2010   | Artesian Well | Valley               |                                                      |                 |               |               | 0.09             |                | < 1            | 100        | < .002          | < 2        |                 | < .01           |
| 99            | 7/12/2010   |               | Valley               |                                                      |                 |               |               | 0.788            |                | 4              | 235        | < .002          | < 2        |                 | < .01           |
| 100           | 7/12/2010   | Kitchen Sink  | Valley               |                                                      |                 |               |               | 0.905            |                | < 1            | 165        | < .002          | < 2        |                 | < .01           |
| 101           | 7/12/2010   |               | Valley               |                                                      |                 |               |               | 2.59             |                | < 1            | 725        | < .002          | < 2        |                 | < .01           |
| 102           | 7/12/2010   |               | Valley               |                                                      |                 |               |               | 0.088            |                | < 1            | 115        | < .002          | < 2        |                 | < .01           |
| 103           | 7/11/2010   | Kitchen Sink  | Valley               | Yes                                                  |                 |               |               | 0.667            |                | < 1            | 160        | < .002          | < 2        |                 | < .01           |



Table S.8. Groundwater Quality Data for 1701 "Pre-Drill" Water Well Samples from Susquehanna County, Pennsylvania

| Water Well ID | Sample Date | Sampling Port  | Topographic Location | Gas Extraction Area (Within 1 km of Active Gas Well) | Selenium (mg/L) | Silver (mg/L) | Sodium (mg/L) | Strontium (mg/L) | Sulfate (mg/L) | Sulfide (mg/L) | TDS (mg/L) | Thallium (mg/L) | TSS (mg/L) | Turbidity (NTU) | Vanadium (mg/L) |
|---------------|-------------|----------------|----------------------|------------------------------------------------------|-----------------|---------------|---------------|------------------|----------------|----------------|------------|-----------------|------------|-----------------|-----------------|
| 104           | 7/12/2010   | Kitchen Sink   | Valley               |                                                      |                 |               |               | 0.071            |                | < 1            | 70         | < .002          | < 2        |                 | < .01           |
| 105           | 7/13/2010   |                | Upland               |                                                      |                 |               |               | 0.491            |                | < 1            | 150        | < .002          | < 2        |                 | < .01           |
| 106           | 7/12/2010   | Kitchen Sink   | Valley               |                                                      |                 |               |               | 0.5              |                | 5              |            | < .002          |            |                 | < .01           |
| 107           | 7/17/2010   | Kitchen Sink   | Valley               |                                                      |                 |               |               | 0.797            |                | < 1            | 125        | < .002          | < 2        |                 | < .01           |
| 108           | 7/17/2010   | Kitchen Sink   | Valley               |                                                      |                 |               |               | 0.354            |                | < 1            | 175        | < .002          | < 2        |                 | < .01           |
| 109           | 7/17/2010   | Kitchen Sink   | Valley               |                                                      |                 |               |               | 0.096            |                | < 1            | 80         | < .002          | < 2        |                 | < .01           |
| 110           | 7/11/2010   |                | Upland               |                                                      |                 |               |               | 0.208            |                | < 1            | 130        | < .002          | < 2        |                 | < .01           |
| 111           | 7/13/2010   | Kitchen Sink   | Valley               |                                                      |                 |               |               | 0.24             |                | < 1            | 85         | < .002          | < 2        |                 | < .01           |
| 112           | 7/13/2010   | Kitchen Sink   | Valley               |                                                      |                 |               |               | 0.541            |                | < 1            | 155        | < .002          | < 2        |                 | < .01           |
| 113           | 7/12/2010   |                | Valley               |                                                      |                 |               |               | 0.461            |                | < 1            | 160        | < .002          | < 2        |                 | < .01           |
| 114           | 7/25/2011   | Kitchen Sink   | Upland               |                                                      |                 |               |               |                  |                |                |            |                 |            |                 |                 |
| 115           | 8/17/2011   | Bathroom Sink  | Valley               |                                                      |                 |               |               |                  |                |                |            |                 |            |                 |                 |
| 116           | 7/5/2011    |                | Valley               |                                                      |                 |               |               |                  |                |                |            |                 |            |                 |                 |
| 117           | 3/12/2009   | Barn           | Valley               |                                                      |                 |               |               | 1.32             |                | < 1            | 140        |                 | < 2        |                 |                 |
| 118           | 2/20/2009   | Basement       | Upland               |                                                      |                 |               |               | 0.034            |                | < 1            | 58         |                 | < 2        |                 |                 |
| 119           | 7/1/2010    |                | Valley               |                                                      |                 |               |               | 0.151            |                | < 1            | 95         | < .002          | < 2        |                 | < .01           |
| 120           | 7/1/2010    |                | Upland               |                                                      |                 |               |               | 2.16             |                | < 1            | < 145      | < .002          | < 2        |                 | < .01           |
| 121           | 2/20/2009   |                | Upland               |                                                      |                 |               |               | 0.086            |                | 1.2            | 340        |                 | < 2        |                 |                 |
| 122           | 8/3/2010    | Hand Dug Well  | Upland               |                                                      |                 |               |               | 0.086            |                | < 1            | 265        | < .002          | 5.2        |                 | < .01           |
| 123           | 2/20/2009   | Basement       | Valley               |                                                      |                 |               |               | 0.169            |                | < 1            | 180        |                 | < 2        |                 |                 |
| 124           | 8/7/2010    | Kitchen Sink   | Upland               |                                                      |                 |               |               | 1.27             |                | < 1            | 195        | < .002          | < 2        |                 | < .01           |
| 125           | 8/7/2010    | Hand Dug Well  | Upland               |                                                      |                 |               |               | 0.15             |                | < 1            | 155        | < .002          | 2          |                 | < .01           |
| 126           | 8/8/2010    | Pressure Tank  | Valley               |                                                      |                 |               |               | 0.638            |                | < 1            | 190        | < 0.002         | < 2        |                 | < 0.01          |
| 127           | 8/8/2010    | Kitchen Sink   | Valley               |                                                      |                 |               |               | < .025           |                | < 1            | 265        | < .002          | < 2        |                 | < .01           |
| 128           | 8/8/2010    | Bathroom Sink  | Valley               |                                                      |                 |               |               | < .025           |                | < 1            | 260        | < .002          | < 2        |                 | < .01           |
| 129           | 8/8/2010    | Kitchen Sink   | Upland               |                                                      |                 |               |               | 0.072            |                | < 1            | 125        | < .002          | < 2        |                 | < .01           |
| 130           | 7/30/2010   | Bathroom Sink  | Valley               | Yes                                                  |                 |               |               | 0.303            |                | < 1            | 110        | < .002          | < 2        |                 | < .01           |
| 131           | 8/13/2010   | Outside Spigot | Upland               |                                                      |                 |               |               | 0.072            |                | < 1            | 110        | < .002          | < 2        |                 | < .01           |
| 132           | 7/20/2010   | Kitchen Sink   | Valley               |                                                      |                 |               |               | 0.945            |                | < 1            | 225        | < .002          | < 2        |                 | < .01           |
| 133           | 7/20/2010   | Heefer Barn    | Upland               |                                                      |                 |               |               | 0.284            |                | < 1            | 165        | < .002          | < 2        |                 | < .01           |
| 134           | 8/11/2010   | House #2       | Valley               |                                                      |                 |               |               | 0.308            |                | < 1            | 155        | < .002          | < 2        |                 | < .01           |
| 135           | 4/15/2009   |                | Upland               |                                                      |                 |               |               | 0.141            |                | < 1            | 40         |                 | < 2        |                 |                 |

Table S.8. Groundwater Quality Data for 1701 "Pre-Drill" Water Well Samples from Susquehanna County, Pennsylvania

| Water Well ID | Sample Date | Sampling Port             | Topographic Location | Gas Extraction Area (Within 1 km of Active Gas Well) | Selenium (mg/L) | Silver (mg/L) | Sodium (mg/L) | Strontium (mg/L) | Sulfate (mg/L) | Sulfide (mg/L) | TDS (mg/L) | Thallium (mg/L) | TSS (mg/L) | Turbidity (NTU) | Vanadium (mg/L) |
|---------------|-------------|---------------------------|----------------------|------------------------------------------------------|-----------------|---------------|---------------|------------------|----------------|----------------|------------|-----------------|------------|-----------------|-----------------|
| 136           | 8/11/2010   | Main House Kitchen Sink   | Valley               |                                                      |                 |               |               | 0.332            |                | < 1            | 150        | < .002          | < 2        |                 | 0.01            |
| 137           | 8/19/2010   |                           | Upland               | Yes                                                  | < .005          | < .005        | 7.43          | 0.299            | 12             | < 1            | 107        |                 | < 2        | < 1             |                 |
| 138           | 8/19/2010   | Barn Well Milkhouse Sink  | Upland               | Yes                                                  | < .005          | < .005        | 6.26          | 0.175            | 16             | < 1            | 170        |                 | < 2        | < 1             |                 |
| 139           | 6/24/2009   | Basement Pressure Tank    | Valley               |                                                      |                 |               |               | 0.047            |                | < 1            | 135        |                 | < 2        |                 |                 |
| 140           | 8/19/2010   | Pressure Tank             | Upland               |                                                      | < .005          | < .005        | 15.5          | 1.54             | 7              | < 1            | 123        |                 | < 2        | < 1             |                 |
| 141           | 8/19/2010   | Kitchen Sink              | Upland               | Yes                                                  | < .005          | < .005        | 4.85          | 0.134            | 9              | < 1            | 210        |                 | 2          | < 1             |                 |
| 142           | 8/19/2010   | Spigot Under Mobile Home  | Upland               | Yes                                                  | < .005          | < .005        | 8.4           | 0.68             | 7              | < 1            | 210        |                 | < 2        | < 1             |                 |
| 143           | 8/20/2010   | Laundry Room Sink         | Upland               |                                                      | < .005          | < .005        | 1.37          | 1.28             | 7              | < 1            | 505        |                 | < 2        | < 1             |                 |
| 144           | 6/24/2009   | Well Head                 | Valley               |                                                      |                 |               |               | < .025           |                | < 1            | 20         |                 | < 2        |                 |                 |
| 145           | 6/24/2009   | Kitchen Sink              | Valley               |                                                      |                 |               |               | 0.209            |                | < 1            | < 2        |                 | < 2        |                 |                 |
| 146           | 8/26/2010   | Outside Spigot            | Upland               |                                                      | < .005          | < .005        | 14.4          | 0.135            | 7              | < 1            | 190        |                 | < 2        | < 1             |                 |
| 147           | 7/29/2010   |                           | Valley               |                                                      |                 |               |               | 2.19             |                | < 1            | 395        | < .002          | < 2        |                 | < .01           |
| 148           | 7/29/2010   | Kitchen Sink              | Upland               | Yes                                                  |                 |               |               | 0.276            |                | 10             | 140        | < .002          | 44         |                 | < .01           |
| 149           | 8/28/2010   | Pressure Tank             | Valley               |                                                      | < .0005         | < .005        | 19            | 0.625            | 20             | < 1            | 225        |                 | < 2        | < 1             |                 |
| 150           | 8/28/2010   | Outside Spigot            | Valley               |                                                      | < .005          | < .005        | 29.1          | 0.195            | 14             | < 1            | 205        |                 | 3          | 6               |                 |
| 151           | 9/2/2010    | Kitchen Sink              | Upland               |                                                      | < .005          | < .005        | 16.8          | 0.162            | 14             | 1              | 208        |                 | < 2        | < 1             |                 |
| 152           | 6/13/2011   | Kitchen Sink              | Valley               |                                                      |                 |               |               |                  |                |                |            |                 |            |                 |                 |
| 153           | 9/10/2010   | Kitchen Faucet            | Valley               |                                                      | < .005          | < .01         | 41.8          | 0.849            | 11             | < 1            | 155        |                 | < 2        | < 1             |                 |
| 154           | 7/20/2010   | Tenant House Kitchen Sink | Upland               |                                                      |                 |               |               | 0.602            |                | < 1            | 140        | < .002          | < 2        |                 | < .01           |
| 155           | 2/27/2010   | Kitchen Sink              | Upland               |                                                      |                 |               |               | 0.067            |                | < 1            | 116        |                 | < 2        | < 1             |                 |
| 156           | 2/22/2010   | Basement At Pressure Tank | Valley               |                                                      |                 |               |               | 0.494            |                | < 1            | 112        |                 | < 2        | < 1             |                 |

Table S.8. Groundwater Quality Data for 1701 "Pre-Drill" Water Well Samples from Susquehanna County, Pennsylvania

| Water Well ID | Sample Date | Sampling Port                    | Topographic Location | Gas Extraction Area (Within 1 km of Active Gas Well) | Selenium (mg/L) | Silver (mg/L) | Sodium (mg/L) | Strontium (mg/L) | Sulfate (mg/L) | Sulfide (mg/L) | TDS (mg/L) | Thallium (mg/L) | TSS (mg/L) | Turbidity (NTU) | Vanadium (mg/L) |
|---------------|-------------|----------------------------------|----------------------|------------------------------------------------------|-----------------|---------------|---------------|------------------|----------------|----------------|------------|-----------------|------------|-----------------|-----------------|
| 157           | 9/17/2010   | Kitchen Sink                     | Valley               |                                                      | < .005          | < .002        | 98.4          | 0.722            | < 5            | 4              | 230        |                 | < 2        | < 1             |                 |
| 158           | 1/10/2010   | Basement Pressure Tank           | Upland               |                                                      |                 |               |               | 0.14             |                | < 1            | 160        |                 | < 2        | < 1             |                 |
| 159           | 10/3/2010   | Kitchen Sink                     | Valley               | Yes                                                  | < .005          | < .0005       | 16.9          | 0.256            | 15             | < 1            | 184        |                 | < 2        | 1               |                 |
| 160           | 1/31/2011   | Kitchen Sink                     | Upland               |                                                      | < .002          | < .001        | 6.1           | 0.69             | 9              | < 1            | 104        |                 | < 2        | < 1             |                 |
| 161           | 4/8/2009    | Laundry Sink                     | Upland               |                                                      |                 |               |               | 0.345            |                | < 1            | 200        |                 | < 2        |                 |                 |
| 162           | 10/7/2010   | Kitchen Sink                     | Upland               |                                                      | < .005          | < .005        | 18.4          | 1.11             |                | < 1            |            |                 |            |                 |                 |
| 163           | 10/7/2010   | Kitchen Sink                     | Valley               | Yes                                                  | < .005          | < .005        | 11.7          | 0.119            |                | < 1            |            |                 |            |                 |                 |
| 164           | 10/7/2010   |                                  | Valley               | Yes                                                  | < .005          | < .005        | 14.4          | 0.158            | 14             | < 1            | 145        |                 | < 2        | 6               |                 |
| 165           | 4/8/2009    | Boiler Room                      | Upland               |                                                      |                 |               |               | 0.411            |                | < 1            | 80         |                 | < 2        |                 |                 |
| 166           | 7/14/2011   | Kitchen Sink                     | Upland               |                                                      |                 |               |               |                  |                |                |            |                 |            |                 |                 |
| 167           | 7/14/2011   | Kitchen Sink                     | Upland               |                                                      |                 |               |               |                  |                |                |            |                 |            |                 |                 |
| 168           | 10/8/2010   | Kitchen Faucet                   | Valley               | Yes                                                  | < .005          | < .005        | 11.2          | 0.137            | 10             | < 1            | 140        |                 | < 2        | < 1             |                 |
| 169           | 10/8/2010   | Outside Spigot                   | Valley               | Yes                                                  | < .005          | < .005        | 12.9          | 0.319            | 17             | < 1            | 144        |                 | < 2        | 3               |                 |
| 170           | 7/22/2010   | Pressure Tank                    | Upland               | Yes                                                  |                 |               |               | 1.09             |                | < 1            | 150        | < .002          | < 2        |                 | < .01           |
| 171           | 4/8/2009    | Career & Tech Bldg Pressure Tank | Upland               |                                                      |                 |               |               | 0.437            |                | < 1            | 150        |                 | < 2        |                 |                 |
| 172           | 4/8/2009    | Boiler Room                      | Upland               |                                                      |                 |               |               | 0.335            |                | < 1            | 150        |                 | < 2        |                 |                 |
| 173           | 10/1/2010   | Kitchen Sink                     | Valley               | Yes                                                  | < .005          | < .005        | 93.8          | 0.52             | < 5            | < 1            | 268        |                 | < 2        | < 1             |                 |
| 174           | 11/5/2009   | Pressure Tank                    | Upland               | Yes                                                  |                 |               |               | 0.334            |                | 2              | 132        |                 | < 2        |                 |                 |
| 175           | 7/14/2011   | Spigot On Side Of House          | Valley               |                                                      |                 |               |               |                  |                |                |            |                 |            |                 |                 |
| 176           | 7/14/2011   | Kitchen Sink                     | Valley               |                                                      |                 |               |               |                  |                |                |            |                 |            |                 |                 |
| 177           | 7/14/2011   | Kitchen Sink                     | Valley               |                                                      |                 |               |               |                  |                |                |            |                 |            |                 |                 |
| 178           | 7/14/2011   | Kitchen Sink                     | Upland               |                                                      |                 |               |               |                  |                |                |            |                 |            |                 |                 |
| 179           | 7/14/2011   | Kitchen Sink                     | Upland               |                                                      |                 |               |               |                  |                |                |            |                 |            |                 |                 |

Table S.8. Groundwater Quality Data for 1701 "Pre-Drill" Water Well Samples from Susquehanna County, Pennsylvania

| Water Well ID | Sample Date | Sampling Port                | Topographic Location | Gas Extraction Area (Within 1 km of Active Gas Well) | Selenium (mg/L) | Silver (mg/L) | Sodium (mg/L) | Strontium (mg/L) | Sulfate (mg/L) | Sulfide (mg/L) | TDS (mg/L) | Thallium (mg/L) | TSS (mg/L) | Turbidity (NTU) | Vanadium (mg/L) |
|---------------|-------------|------------------------------|----------------------|------------------------------------------------------|-----------------|---------------|---------------|------------------|----------------|----------------|------------|-----------------|------------|-----------------|-----------------|
| 180           | 10/10/2010  | Kitchen Sink Rental Property | Valley               | Yes                                                  | < .005          | < .005        | 40            | 0.1              | 28             | < 1            | 295        |                 | < 2        | < 1             |                 |
| 181           | 4/15/2009   | Pressure Tank                | Valley               | Yes                                                  |                 |               |               | 0.435            |                | < 1            | 120        |                 | < 2        |                 |                 |
| 182           | 10/10/2010  | Kitchen Sink                 | Valley               | Yes                                                  | < .005          | < .005        | 9             | 0.259            | 15             | < 1            | 135        |                 | < 2        | < 1             |                 |
| 183           | 11/4/2010   | Kitchen Sink                 | Valley               |                                                      | < .002          | < .001        | 7.4           | 0.16             | 13             | < 1            | 104        |                 | < 2        | < 1             |                 |
| 184           | 11/4/2010   | Kitchen Sink                 | Upland               |                                                      | < .002          | < .001        | 18.2          | 0.23             | 10             | < 1            | 128        |                 | < 2        | 1               |                 |
| 185           | 3/12/2009   | Basement Before Filter       | Upland               | Yes                                                  |                 |               |               |                  |                | < 1            | 236        |                 | < 2        |                 |                 |
| 186           | 10/10/2010  | Outside Spigot               | Valley               | Yes                                                  | < .005          | < .005        | 9.7           | 0.288            | 12             | < 1            | 140        |                 | < 2        | 1               |                 |
| 187           | 11/4/2010   | Pressure Tank                | Valley               |                                                      | < .002          | < .001        | 69.1          | 0.23             | 7              | < 1            | 164        |                 | < 2        | < 1             |                 |
| 188           | 11/6/2010   | Kitchen Sink                 | Valley               | Yes                                                  | < .002          | < .001        | 18.7          | 0.056            | 9              | < 1            | 148        |                 | < 2        | 1               |                 |
| 189           | 11/6/2010   | Outside Spigot               | Valley               |                                                      | < .002          | < .001        | 11.3          | 0.26             | 12             | < 1            | 116        |                 | < 2        | < 1             |                 |
| 190           | 11/7/2010   | Kitchen Sink                 | Valley               | Yes                                                  | < .002          | < .001        | 28.4          | 0.12             | 36             | < 1            | 264        |                 | < 2        | < 1             |                 |
| 191           | 11/7/2010   | Pressure Tank                | Valley               | Yes                                                  | < .002          | < .001        | 18.5          | 0.32             | 17             | 1              | 196        |                 | < 2        | 1               |                 |
| 192           | 11/7/2010   | Kitchen Sink                 | Valley               | Yes                                                  | < .002          | < .001        | 36.7          | 0.12             | 24             | < 1            | 228        |                 | < 2        | < 1             |                 |
| 193           | 10/13/2010  | Kitchen Faucet               | Valley               | Yes                                                  | < .005          | < .005        | 9.24          | 0.294            | 13             | < 1            | 175        |                 | < 2        | 1               |                 |
| 194           | 10/13/2010  | Pressure Tank                | Valley               | Yes                                                  | < .005          | < .005        | 14            | 0.492            | 15             | < 1            | 170        |                 | < 2        | 1               |                 |
| 195           | 10/13/2010  | Pressure Tank                | Valley               | Yes                                                  | < .005          | < .005        | 22.6          | 0.077            | 21             | < 1            | 210        |                 | < 2        | < 1             |                 |
| 196           | 10/13/2010  | Kitchen Sink                 | Valley               | Yes                                                  | < .005          | < .005        | 8.27          | 0.333            | 17             | < 1            | 165        |                 | < 2        | < 1             |                 |
| 197           | 10/11/2010  | Kitchen Sink                 | Valley               | Yes                                                  | < .005          | < .005        | 8.7           | 0.071            | 8              | < 1            | 170        |                 | < 2        | < 1             |                 |
| 198           | 10/18/2010  | Bathroom Sink                | Valley               |                                                      | <0.005          | <0.005        | 15.9          | 0.096            | 25             | <1             | 240        |                 | 4.6        | <1              |                 |
| 199           | 10/2/2010   | Kitchen Sink Faucet          | Upland               |                                                      | < .005          | < .005        | 19.3          | 0.513            | < 5            | < 1            | 148        |                 | < 2        | 1               |                 |

Table S.8. Groundwater Quality Data for 1701 "Pre-Drill" Water Well Samples from Susquehanna County, Pennsylvania

| Water Well ID | Sample Date | Sampling Port          | Topographic Location | Gas Extraction Area (Within 1 km of Active Gas Well) | Selenium (mg/L) | Silver (mg/L) | Sodium (mg/L) | Strontium (mg/L) | Sulfate (mg/L) | Sulfide (mg/L) | TDS (mg/L) | Thallium (mg/L) | TSS (mg/L) | Turbidity (NTU) | Vanadium (mg/L) |
|---------------|-------------|------------------------|----------------------|------------------------------------------------------|-----------------|---------------|---------------|------------------|----------------|----------------|------------|-----------------|------------|-----------------|-----------------|
| 200           | 10/2/2010   | Pressure Tank          | Valley               |                                                      | < .005          | < .005        | 13.8          | 0.26             | 9              | < 1            | 136        |                 | < 2        | < 1             |                 |
| 201           | 10/2/2010   | Bathroom Faucet        | Valley               |                                                      | < .005          | < .005        | 13.5          | 0.3              | 8              | < 1            | 112        |                 | < 2        | 1               |                 |
| 202           | 10/15/2010  | Kitchen Sink           | Valley               | Yes                                                  | < .005          | < .005        | 11.5          | 0.134            | 14             | < 1            | 115        |                 | < 2        | < 1             |                 |
| 203           | 4/19/2009   |                        | Valley               | Yes                                                  |                 |               |               | 0.039            |                | <1             | 184        |                 | <2         |                 |                 |
| 204           | 4/4/2008    |                        | Upland               |                                                      |                 |               |               | 0.031            |                | <1             | 40         |                 | <2         |                 |                 |
| 205           | 10/19/2010  | Kitchen Sink           | Valley               | Yes                                                  | < .005          | < .005        | 54.6          | 0.739            | 16             | < 1            | 160        |                 | < 2        | 0.128           |                 |
| 206           | 10/19/2010  | Kitchen Sink           | Valley               | Yes                                                  | < .005          | < .005        | 8.62          | 0.252            | 18             | < 1            | 160        |                 | < 2        | 1               |                 |
| 207           | 10/19/2010  | Hand Dug Well          | Valley               | Yes                                                  | < .005          | < .005        | 2.06          | 0.028            | 9              | 1              | 65         |                 | < 2        | 3               |                 |
| 208           | 10/20/2010  | Kitchen Sink           | Valley               | Yes                                                  | < .005          | < .005        | 9.05          | 0.196            | 14             | < 1            | 175        |                 | < 2        | 1               |                 |
| 209           | 10/26/2010  | Kitchen Sink           | Valley               | Yes                                                  | < .005          | < .005        | 10.1          | 0.143            | 15             | < 1            | 180        |                 | < 2        | 2               |                 |
| 210           | 10/26/2010  | Outside Spigot         | Valley               |                                                      | < .005          | < .005        | 14            | 0.448            | 13             | < 1            | 250        |                 | < 2        | 6               |                 |
| 211           | 7/14/2011   | Kitchen Sink           | Upland               |                                                      |                 |               |               |                  |                |                |            |                 |            |                 |                 |
| 212           | 8/1/2011    | Kitchen Sink           | Valley               |                                                      |                 |               |               |                  |                |                |            |                 |            |                 |                 |
| 213           | 10/26/2010  |                        | Valley               | Yes                                                  | < .005          | < .005        | 18.4          | 0.106            | 16             | < 1            | 210        |                 | < 2        | 1               |                 |
| 214           | 10/28/2010  | Kitchen Sink           | Valley               | Yes                                                  | < .005          | < .005        | 15.5          | 0.254            | 14             | < 1            | 200        |                 | < 2        | 1               |                 |
| 215           | 7/17/2010   | Outside Spigot         | Valley               |                                                      |                 |               |               | 0.98             |                | < 1            | 135        | < .002          | < 2        |                 | < .01           |
| 216           | 10/28/2010  | Basement Pressure Tank | Valley               |                                                      | < .005          | < .005        | 56.1          | 1.44             | 12             | < 1            | 220        |                 | < 2        | < 1             |                 |
| 217           | 10/28/2010  | Pressure Tank          | Upland               |                                                      | < .005          | < .005        | 19.4          | 0.645            | 14             | < 1            | 220        |                 | < 2        | < 1             |                 |
| 218           | 10/28/2010  | Bar Sink               | Upland               |                                                      | < .005          | < .005        | 3.35          | 0.043            | 13             | < 1            | 150        |                 | < 2        | < 1             |                 |
| 219           | 10/29/2010  | Outside Spigot         | Valley               | Yes                                                  | < .005          | < .005        | 56.3          | 1.14             | 12             | < 1            | 300        |                 | < 2        | < 1             |                 |
| 220           | 10/29/2010  |                        | Valley               |                                                      | < .005          | < .005        | 15.8          | 1.11             | 12             | < 1            | 180        |                 | < 2        | < 1             |                 |
| 221           | 10/29/2010  | Outside Sink           | Valley               |                                                      | < .005          | < .005        | 54.5          | 0.078            | 14             | < 1            | 240        |                 | < 2        | < 1             |                 |
| 222           | 10/29/2010  | Kitchen Faucet         | Upland               |                                                      | < .005          | < .005        | 15.2          | 0.119            | 14             | < 1            | 190        |                 | < 2        | < 1             |                 |
| 223           | 11/10/2010  | Kitchen Sink           | Upland               |                                                      | < .002          | < .001        | 16.8          | 1                | 9              | < 1            | 180        |                 | < 2        | 1               |                 |

Table S.8. Groundwater Quality Data for 1701 "Pre-Drill" Water Well Samples from Susquehanna County, Pennsylvania

| Water Well ID | Sample Date | Sampling Port             | Topographic Location | Gas Extraction Area (Within 1 km of Active Gas Well) | Selenium (mg/L) | Silver (mg/L) | Sodium (mg/L) | Strontium (mg/L) | Sulfate (mg/L) | Sulfide (mg/L) | TDS (mg/L) | Thallium (mg/L) | TSS (mg/L) | Turbidity (NTU) | Vanadium (mg/L) |
|---------------|-------------|---------------------------|----------------------|------------------------------------------------------|-----------------|---------------|---------------|------------------|----------------|----------------|------------|-----------------|------------|-----------------|-----------------|
| 224           | 11/10/2010  | Kitchen Sink              | Valley               |                                                      | < .002          | < .001        | 7.14          | 0.27             | 9              | 1              | 128        |                 | < 2        | 1               |                 |
| 225           | 9/28/2010   |                           | Upland               |                                                      | < .005          | < .005        | 17.4          | 0.679            | 22             | < 1            | 200        |                 | 2.8        | 6               |                 |
| 226           | 11/11/2010  | Outside Spigot            | Valley               | Yes                                                  | < .002          | < .001        | 13.9          | 0.49             | 16             | < 1            | 193        |                 | < 2        | 1               |                 |
| 227           | 11/11/2010  | Kitchen Faucet            | Valley               | Yes                                                  | < .002          | < .001        | 9.6           | 0.13             | 5              | < 1            | 127        |                 | < 2        | < 1             |                 |
| 228           | 9/28/2010   | Kitchen Sink              | Valley               |                                                      | < .005          | < .005        | 3.6           | 0.06             | 10             | < 1            | 100        |                 | < 2        | < 1             |                 |
| 229           | 11/17/2010  | Kitchen Sink              | Valley               | Yes                                                  | < .002          | < .001        | 18.2          | 0.71             | 18             | < 1            | 173        |                 | < 2        | < 1             |                 |
| 230           | 11/17/2010  | Kitchen Sink              | Upland               |                                                      | < .002          | < .001        | 14.1          | 0.8              | 30             | < 10           | 187        |                 | 22         | 21              |                 |
| 231           | 11/17/2010  | Kitchen Sink              | Upland               |                                                      | < .002          | < .001        | 1.86          | 0.021            | 7              | < 1            | 40         |                 | < 2        | < 1             |                 |
| 232           | 12/4/2010   | Kitchen Sink              | Valley               | Yes                                                  | < .005          | < .005        | 30.1          | 0.489            | 35             | 2              | 260        |                 | < 2        | < 1             |                 |
| 233           | 12/4/2010   | Kitchen Sink              | Valley               | Yes                                                  | < .005          | < .005        | 1.69          | 0.054            | 10             | < 1            | 213        |                 | < 2        | 2               |                 |
| 234           | 12/4/2010   | Basement At Pressure Tank | Valley               | Yes                                                  | < .005          | < .005        | 13.8          | 0.11             | 15             | < 1            | 173        |                 | < 2        | 1               |                 |
| 235           | 12/4/2010   | Kitchen Sink              | Valley               | Yes                                                  | < .005          | < .005        | 16.7          | 0.2              | 20             | < 1            | 227        |                 | < 2        | 1               |                 |
| 236           | 12/5/2010   | Kitchen Sink              | Upland               | Yes                                                  | < .005          | < .005        | 1.96          | 0.031            | 11             | < 1            | 73         |                 | < 2        | 1               |                 |
| 237           | 12/5/2010   | Kitchen Faucet            | Valley               | Yes                                                  | < .005          | < .005        | 14.3          | 0.485            | 16             | < 1            | 173        |                 | < 2        | < 1             |                 |
| 238           | 12/5/2010   | Barn At Ceiling Spigot    | Valley               | Yes                                                  | < .005          | < .005        | 22.5          | 1.35             | 9              | < 1            | 160        |                 | < 2        | < 1             |                 |
| 239           | 2/17/2009   | Kitchen Sink              | Valley               | Yes                                                  |                 |               |               | 0.358            |                | < 1            | 139        |                 | < 2        |                 |                 |
| 240           | 12/8/2010   | Kitchen Sink              | Valley               | Yes                                                  | < .002          | < .001        | 21            | 0.7              | 20             | < 1            | 140        |                 | < 2        | < 1             |                 |
| 241           | 12/8/2010   | Kitchen Sink              | Upland               |                                                      | < .002          | < .001        | 12            | 0.034            | 8              | < 1            | 20         |                 | < 2        | 1               |                 |
| 242           | 12/8/2010   | Kitchen Sink              | Valley               | Yes                                                  | < .002          | < .001        | 1.6           | 0.019            | 7              | < 1            | 40         |                 | < 2        | 1               |                 |
| 243           | 12/8/2010   | Hand Dug Well             | Upland               |                                                      | < .002          | < .001        | 21            | 0.075            | 17             | < 1            | 127        |                 | < 2        | 1               |                 |
| 244           | 2/17/2009   | Kitchen Sink              | Valley               | Yes                                                  |                 |               |               | 0.149            |                | < 1            | 106        |                 | < 2        |                 |                 |
| 245           | 4/4/2009    | Well Head                 | Valley               | Yes                                                  |                 |               |               | 0.34             |                | < 1            | 120        |                 | 14         |                 |                 |

Table S.8. Groundwater Quality Data for 1701 "Pre-Drill" Water Well Samples from Susquehanna County, Pennsylvania

| Water Well ID | Sample Date | Sampling Port             | Topographic Location | Gas Extraction Area (Within 1 km of Active Gas Well) | Selenium (mg/L) | Silver (mg/L) | Sodium (mg/L) | Strontium (mg/L) | Sulfate (mg/L) | Sulfide (mg/L) | TDS (mg/L) | Thallium (mg/L) | TSS (mg/L) | Turbidity (NTU) | Vanadium (mg/L) |
|---------------|-------------|---------------------------|----------------------|------------------------------------------------------|-----------------|---------------|---------------|------------------|----------------|----------------|------------|-----------------|------------|-----------------|-----------------|
| 246           | 12/11/2010  | Kitchen Sink              | Valley               |                                                      | < .002          | < .001        | 17            | 0.92             | 9              | 1              | 53         |                 | < 2        | < 1             |                 |
| 247           | 12/11/2010  |                           | Upland               |                                                      | < .002          | < .001        | 22            | 0.097            | 8              | < 1            | 107        |                 | < 2        | < 1             |                 |
| 248           | 12/11/2010  | Kitchen Sink              | Valley               |                                                      | < .002          | < .001        | 8.4           | 1.1              | 6              | < 1            | 100        |                 | < 2        | 1               |                 |
| 249           | 3/16/2009   | Basement At Pressure Tank | Valley               | Yes                                                  |                 |               |               | 0.078            |                | < 1            | 113        |                 | < 2        |                 |                 |
| 250           | 12/17/2010  | Pressure Tank             | Upland               |                                                      | 0.002           | 0.001         | 4.2           | 0.033            | 14             | < 5            | 93         |                 | 2.8        | 2               |                 |
| 251           | 12/17/2010  | Pressure Tank             | Upland               |                                                      | < .002          | < .001        | 5.2           | 0.096            | 14             | < 5            | 73         |                 | 23         | 16              |                 |
| 252           | 12/18/2010  | Basement Pressure Tank    | Valley               | Yes                                                  | < .002          | < .001        | 23            | 0.15             | 22             | < 5            | 200        |                 | 4          | 1               |                 |
| 253           | 6/24/2009   | Kitchen Sink              | Upland               | Yes                                                  |                 |               |               | 0.269            |                | < 1            | 140        |                 | < 2        |                 |                 |
| 254           | 12/18/2010  | Kitchen Sink              | Valley               | Yes                                                  | < .002          | < .001        | 22            | 0.62             | < 5            | < 5            | 153        |                 | 3.2        | 3               |                 |
| 255           | 3/19/2009   | Kitchen Sink              | Valley               | Yes                                                  |                 |               |               | 0.875            |                | < 1            | 200        |                 | < 2        |                 |                 |
| 256           | 3/19/2009   | Kitchen Sink              | Upland               | Yes                                                  |                 |               |               | 0.127            |                | < 1            | 193        |                 | < 2        |                 |                 |
| 257           | 12/14/2010  | Kitchen Sink              | Valley               | Yes                                                  | < .002          | < .001        | 13            | 0.49             | 13             | < 1            | 147        |                 | < 2        | < 1             |                 |
| 258           | 3/4/2009    | Kitchen Sink              | Upland               |                                                      |                 |               |               | 0.073            |                | < 1            | 150        |                 | < 2        |                 |                 |
| 259           | 12/14/2010  | Hydrant                   | Valley               | Yes                                                  | < .002          | < .001        | 10            | 0.52             | 14             | < 25           | 153        |                 | 62         | 30              |                 |
| 260           | 12/14/2010  | Kitchen Sink              | Valley               | Yes                                                  | < .002          | < .001        | 19            | 0.74             | 8              | < 1            | 153        |                 | 2          | < 1             |                 |
| 261           | 12/14/2010  | Bathtub Faucet            | Valley               | Yes                                                  | < .002          | < .001        | 17            | 0.29             | 19             | < 1            | 207        |                 | 2.8        | < 1             |                 |
| 262           | 2/23/2011   |                           | Valley               | Yes                                                  | < .002          | < .001        | 8.9           | 0.2              | 10             | < 1            | 145        |                 | < 2        | 1               |                 |
| 263           | 12/19/2010  |                           | Valley               | Yes                                                  | < .002          | < .001        | 13            | 0.29             | 17             | < 1            | 246.7      |                 | < 2        | < 1             |                 |
| 264           | 12/19/2010  | Kitchen Sink              | Valley               |                                                      | < .002          | < .001        | 39            | 0.89             | 7              | 2              | 133        |                 | < 2        | < 1             |                 |
| 265           | 12/19/2010  | Kitchen Faucet            | Valley               |                                                      | < .002          | < .001        | 4.1           | 0.05             | 9              | < 1            | 53         |                 | < 2        | < 1             |                 |

Table S.8. Groundwater Quality Data for 1701 "Pre-Drill" Water Well Samples from Susquehanna County, Pennsylvania

| Water Well ID | Sample Date | Sampling Port                                      | Topographic Location | Gas Extraction Area (Within 1 km of Active Gas Well) | Selenium (mg/L) | Silver (mg/L) | Sodium (mg/L) | Strontium (mg/L) | Sulfate (mg/L) | Sulfide (mg/L) | TDS (mg/L) | Thallium (mg/L) | TSS (mg/L) | Turbidity (NTU) | Vanadium (mg/L) |
|---------------|-------------|----------------------------------------------------|----------------------|------------------------------------------------------|-----------------|---------------|---------------|------------------|----------------|----------------|------------|-----------------|------------|-----------------|-----------------|
| 266           | 12/19/2010  | School Art Studio Bathroom Sink                    | Valley               | Yes                                                  | < .002          | < .001        | 11            | 0.27             | 19             | < 1            | 153        |                 | < 2        | 2               |                 |
| 267           | 2/26/2009   |                                                    | Upland               |                                                      |                 |               |               | 0.078            |                | <1             | 80         |                 | <2         |                 |                 |
| 268           | 1/27/2011   | Downstairs Kitchen Sink                            | Valley               |                                                      | < .002          | < .001        | 79            | 0.14             | 9              | < 1            | 284        |                 | < 2        | 1               |                 |
| 269           | 1/27/2011   | Kitchen Sink                                       | Valley               |                                                      | < .002          | < .001        | 5.5           | 0.22             | 8              | < 1            | 56         |                 | < 2        | < 1             |                 |
| 270           | 1/27/2011   | Kitchen Sink                                       | Valley               |                                                      | < .002          | < .001        | 4.9           | 0.12             | 8              | < 1            | 72         |                 | < 2        | 1               |                 |
| 271           | 3/4/2009    | Kitchen Sink                                       | Upland               |                                                      |                 |               |               | 0.42             |                | < 1            | 172        |                 | < 2        |                 |                 |
| 272           | 2/11/2011   | Kitchen Sink                                       | Upland               | Yes                                                  | < .002          | < .001        | 17            | 1.8              | 22             | < 1            | 180        |                 | < 2        | < 1             |                 |
| 273           | 2/11/2011   | Kitchen Sink                                       | Upland               |                                                      | < .002          | < .001        | 8             | 0.19             | 17             | < 1            | 340        |                 | < 2        | < 1             |                 |
| 274           | 2/11/2011   | Kitchen Sink                                       | Upland               |                                                      | < .002          | < .001        | 60            | 0.79             | 5              | < 1            | 153        |                 | < 2        | < 1             |                 |
| 275           | 2/11/2011   | Kitchen Sink                                       | Upland               | Yes                                                  | < .002          | < .001        | 31            | 1.7              | 35             | < 1            | 380        |                 | < 2        | < 1             |                 |
| 276           | 2/11/2011   | In Milkhouse, At Bottom Of Pressure Tank           | Upland               |                                                      | < .002          | < .001        | 17            | 1.7              | 23             | < 1            | 153        |                 | < 2        | < 1             |                 |
| 277           | 2/4/2011    | Pressure Tank                                      | Valley               | Yes                                                  | < .002          | 0.001         | 17            | 0.24             | 14             | < 1            | 140        |                 | < 2        | 5               |                 |
| 278           | 2/8/2011    | Bathtub                                            | Valley               |                                                      | < .002          | < .001        | 6.1           | 0.29             | 20             | < 1            | 167        |                 | < 2        | 2               |                 |
| 279           | 3/4/2009    | Kitchen Sink                                       | Upland               |                                                      |                 |               |               | 0.063            |                | < 1            | 166        |                 | < 2        |                 |                 |
| 280           | 2/8/2011    | Kitchen Sink                                       | Upland               |                                                      | < .002          | < .001        | 6.8           | 0.13             | 22             | 1              | 180        |                 | < 2        | < 1             |                 |
| 281           | 10/19/2010  | Kitchen Sink                                       | Valley               | Yes                                                  | < .005          | < .005        | 8.55          | 0.553            | 17             | < 1            | 155        |                 | < 2        | < 1             |                 |
| 282           | 2/8/2011    | Kitchen Sink, Small Spigot On Right Hand Side Of S | Valley               |                                                      | < .002          | < .001        | 8.4           | 0.28             | 8              | 1              | 127        |                 | < 2        | 1               |                 |
| 283           | 2/11/2011   | Kitchen Sink                                       | Upland               | Yes                                                  | < .002          | < .001        | 110           | 0.033            | 29             | < 1            | 347        |                 | < 2        | < 1             |                 |
| 284           | 2/11/2011   | Kitchen Sink                                       | Upland               |                                                      | < .002          | < .001        | 6.6           | 0.66             | 11             | < 1            | 127        |                 | < 2        | 1               |                 |



Table S.8. Groundwater Quality Data for 1701 "Pre-Drill" Water Well Samples from Susquehanna County, Pennsylvania

| Water Well ID | Sample Date | Sampling Port                      | Topographic Location | Gas Extraction Area (Within 1 km of Active Gas Well) | Selenium (mg/L) | Silver (mg/L) | Sodium (mg/L) | Strontium (mg/L) | Sulfate (mg/L) | Sulfide (mg/L) | TDS (mg/L) | Thallium (mg/L) | TSS (mg/L) | Turbidity (NTU) | Vanadium (mg/L) |
|---------------|-------------|------------------------------------|----------------------|------------------------------------------------------|-----------------|---------------|---------------|------------------|----------------|----------------|------------|-----------------|------------|-----------------|-----------------|
| 285           | 2/8/2011    | Rental (Adam Vibbard) Kitchen Sink | Upland               |                                                      | < .002          | < .001        | 15            | 1.4              | 11             | < 1            | 160        |                 | < 2        | < 1             |                 |
| 286           | 2/8/2011    | Kitchen Sink                       | Upland               |                                                      | < .002          | < .001        | 11            | 0.094            | 8              | < 1            | 120        |                 | < 2        | < 1             |                 |
| 287           | 1/13/2011   | Kitchen Sink                       | Valley               | Yes                                                  |                 |               |               | 0.67             |                | < 1            | 125        |                 | < 2        |                 |                 |
| 288           | 2/15/2011   | Pressure Tank                      | Upland               |                                                      | < .002          | < .001        | 17            | 1.3              | 9              | < 1            | 133        |                 | < 2        | 1               |                 |
| 289           | 2/15/2011   | Laundry Room Faucet                | Upland               |                                                      | < .002          | < .001        | 39            | 1.3              | 6              | < 1            | 140        |                 | < 2        | < 1             |                 |
| 290           | 3/4/2009    | Kitchen Sink                       | Valley               |                                                      |                 |               |               | 0.058            |                | < 1            | 216        |                 | < 2        |                 |                 |
| 291           | 2/14/2011   | Kitchen Sink                       | Upland               |                                                      | < .002          | < .001        | 13            | 1.4              | 11             | < 1            | 207        |                 | < 2        | < 1             |                 |
| 292           | 2/15/2011   | Kitchen Faucet                     | Valley               |                                                      | < .002          | < .001        | 100           | 0.15             | 16             | < 1            | 420        |                 | 2          | 1               |                 |
| 293           | 2/14/2011   | Barn Milkhouse Sink                | Valley               |                                                      | < .002          | < .001        | 8.6           | 0.14             | 10             | < 1            | 147        |                 | < 2        | 1               |                 |
| 294           | 2/15/2011   | Milkhouse Faucet                   | Upland               | Yes                                                  | < .002          | < .001        | 25            | 1.1              | 15             | < 1            | 160        |                 | < 2        | 1               |                 |
| 295           | 2/15/2011   | 1St Floor Kitchen Faucet           | Upland               | Yes                                                  | < .002          | < .001        | 8.3           | 0.32             | 11             | < 1            | 140        |                 | < 2        | < 1             |                 |
| 296           | 2/17/2011   | Pressure Tank In Basement          | Upland               | Yes                                                  | < .002          | < .001        | 24            | 0.83             | 45             | < 1            | 233        |                 | < 2        | 1               |                 |
| 297           | 3/4/2009    | 1St Floor Mens Room Sink           | Valley               |                                                      |                 |               |               | 0.126            |                | < 1            | 146        |                 | < 2        |                 |                 |
| 298           | 3/21/2011   |                                    | Valley               |                                                      | 0.013           | < .001        | 458           | 7.6              | 1.4            | < 3            | 1390       |                 | < 4        | 2.8             |                 |
| 299           | 3/21/2011   |                                    | Upland               | Yes                                                  | < .005          | < .001        | 8.4           | 0.27             | 11.2           | < 3            | 304        |                 | < 4        | 4.8             |                 |
| 300           | 3/22/2011   |                                    | Valley               | Yes                                                  | < .005          | < .001        | 7             | 0.48             | 11.4           | < 3            | 145        |                 | < 4        | < 1             |                 |
| 301           | 3/4/2009    | Kitchen Sink                       | Valley               |                                                      |                 |               |               | 0.195            |                | < 1            | 142        |                 | < 2        |                 |                 |
| 302           | 12/10/2010  | Garage Faucet                      | Upland               | Yes                                                  | < .002          | < .001        | 23            | 0.31             | 12             | < 1            | 207        |                 | < 2        | 1               |                 |
| 303           | 12/10/2010  | Kitchen Faucet                     | Upland               | Yes                                                  | < .002          | < .001        | 9.4           | 0.58             | 10             | < 1            | 93         |                 | < 2        | < 1             |                 |

Table S.8. Groundwater Quality Data for 1701 "Pre-Drill" Water Well Samples from Susquehanna County, Pennsylvania

| Water Well ID | Sample Date | Sampling Port             | Topographic Location | Gas Extraction Area (Within 1 km of Active Gas Well) | Selenium (mg/L) | Silver (mg/L) | Sodium (mg/L) | Strontium (mg/L) | Sulfate (mg/L) | Sulfide (mg/L) | TDS (mg/L) | Thallium (mg/L) | TSS (mg/L) | Turbidity (NTU) | Vanadium (mg/L) |
|---------------|-------------|---------------------------|----------------------|------------------------------------------------------|-----------------|---------------|---------------|------------------|----------------|----------------|------------|-----------------|------------|-----------------|-----------------|
| 304           | 12/10/2010  | Kitchen Sink              | Valley               | Yes                                                  | < .002          | < .001        | 13            | 0.21             | 16             | < 1            | 113        |                 | < 2        | < 1             |                 |
| 305           | 12/10/2010  |                           | Upland               | Yes                                                  | < .002          | < .001        | 22            | 0.21             | 11             | < 1            | 140        |                 | < 2        | 4               |                 |
| 306           | 12/10/2010  | Pressure Tank             | Upland               |                                                      | < .002          | < .001        | 25            | 0.1              | 17             | < 1            | 193        |                 | < 2        | < 1             |                 |
| 307           | 12/10/2010  | Kitchen Faucet            | Valley               |                                                      | < .002          | < .001        | 1.5           | 0.028            | 12             | < 1            | 53         |                 | < 2        | < 1             |                 |
| 308           | 12/14/2010  | Kitchen Sink              | Valley               | Yes                                                  | < .002          | < .001        | 9.6           | 0.22             | 11             | < 1            | 153        |                 | < 2        | < 1             |                 |
| 309           | 3/12/2009   | Kitchen Sink Faucet       | Upland               |                                                      |                 |               |               | 0.057            |                | < 1            | 92         |                 | < 2        |                 |                 |
| 310           | 12/20/2010  | Kitchen Sink              | Upland               |                                                      | < .002          | < .001        | 18            | 1.3              | 22             | < 1            | 220        |                 | < 2        | < 1             |                 |
| 311           | 12/20/2010  | Pressure Tank             | Valley               |                                                      | < .002          | < .001        | 28            | 0.67             | 13             | 2              | 207        |                 | 5.6        | 3               |                 |
| 312           | 12/20/2010  | Basement At Pressure Tank | Valley               |                                                      | < .002          | < .001        | 24            | 0.4              | 16             | < 1            | 247        |                 | < 2        | 1               |                 |
| 313           | 12/20/2010  | Kitchen Sink              | Upland               |                                                      | < .002          | < .001        | 4.8           | 0.21             | 11             | < 1            | 147        |                 | < 2        | 2               |                 |
| 314           | 12/20/2010  | Kitchen Sink              | Upland               |                                                      | < .002          | < .001        | 5.9           | 0.21             | 10             | < 1            | 153        |                 | < 2        | 1               |                 |
| 315           | 3/4/2009    | Pressure Tank In Basement | Upland               |                                                      |                 |               |               | 0.143            |                | < 1            | 168        |                 | < 2        |                 |                 |
| 316           | 12/20/2010  | Bathtub Faucet            | Upland               |                                                      | < .002          | < .001        | 6.7           | 0.47             | 11             | < 1            | 133        |                 | < 2        | 1               |                 |
| 317           | 4/15/2009   | Horse Barn Faucet         | Valley               | Yes                                                  |                 |               |               | 0.109            |                | < 1            | 170        |                 | < 2        |                 |                 |
| 318           | 1/6/2011    | Kitchen Sink              | Upland               | Yes                                                  | < .002          | < .001        | 34            | 0.29             | 9              | < 1            | 132        |                 | < 2        | < 1             |                 |
| 319           | 4/19/2009   | Kitchen Sink Faucet       | Valley               | Yes                                                  |                 |               |               | 0.172            |                | < 1            | 180        |                 | < 2        |                 |                 |
| 320           | 4/8/2009    | Barn After Filter         | Valley               |                                                      |                 |               |               | 0.053            |                | < 1            | 96         |                 | 2.8        |                 |                 |
| 321           | 4/12/2011   | Cwt Of Kitchen Sink       | Valley               |                                                      | < .005          | < .001        | 7             | 0.12             | 9              | < 3            | 177        |                 | < 4        | < 1             |                 |
| 322           | 4/13/2011   | Well                      | Upland               | Yes                                                  | < .005          | < .001        | 17.2          | 0.5              | 4.5            | < 3            | 162        |                 | < 4        | 2.1             |                 |
| 323           | 4/13/2011   | Kitchen Sink              | Valley               | Yes                                                  | < .005          | < .001        | 3.2           | 0.064            | 10.2           | < 3            | 112        |                 | < 4        | < 1             |                 |
| 324           | 4/13/2011   | Kitchen Sink Cwt          | Upland               |                                                      | < .005          | < .001        | 10.1          | 0.34             | 13.2           | 1              | 162        |                 | 9.2        | 3               |                 |

Table S.8. Groundwater Quality Data for 1701 "Pre-Drill" Water Well Samples from Susquehanna County, Pennsylvania

| Water Well ID | Sample Date | Sampling Port                                | Topographic Location | Gas Extraction Area (Within 1 km of Active Gas Well) | Selenium (mg/L) | Silver (mg/L) | Sodium (mg/L) | Strontium (mg/L) | Sulfate (mg/L) | Sulfide (mg/L) | TDS (mg/L) | Thallium (mg/L) | TSS (mg/L) | Turbidity (NTU) | Vanadium (mg/L) |
|---------------|-------------|----------------------------------------------|----------------------|------------------------------------------------------|-----------------|---------------|---------------|------------------|----------------|----------------|------------|-----------------|------------|-----------------|-----------------|
| 325           | 4/13/2011   | Kitchen Sink Cwt                             | Upland               |                                                      | < .005          | < .001        | 27            | 0.61             | 18.8           | 0.72           | 178        |                 | < 4        | < 1             |                 |
| 326           | 3/12/2009   | Basement Before Filter                       | Upland               | Yes                                                  |                 |               |               | 0.085            |                | < 1            | 104        |                 | < 2        |                 |                 |
| 327           | 4/14/2011   | Farmhouse Kitchen Sink Cwt                   | Valley               |                                                      | < .005          | < .001        | 6.9           | 1                | 23.3           | < 3            | 205        |                 | < 4        | < 1             |                 |
| 328           | 4/15/2011   | Kitchen Sink Cwt                             | Upland               |                                                      | < .005          | < .001        | 7.8           | 0.15             | 15             | < 3            | 132        |                 | < 4        | 2.4             |                 |
| 329           | 4/18/2011   | Pressure Tank In Basement                    | Valley               |                                                      | < .005          | < .001        | 46.6          | 0.058            | 14.9           | < 3            | 233        |                 | < 4        | < 1             |                 |
| 330           | 4/18/2011   | Kitchen Sink                                 | Upland               |                                                      | < .005          | < .001        | 8.4           | 0.34             | 28.8           | < 3            | 170        |                 | < 4        | < 1             |                 |
| 331           | 4/19/2011   | Kitchen Faucet                               | Upland               |                                                      | < .005          | < .001        | 16.3          | 0.19             | 22.7           | < 3            | 165        |                 | < 4        | < 1             |                 |
| 332           | 4/22/2011   | Mary Steele Kitchen Sink                     | Valley               | Yes                                                  | < .005          | < .001        | 7.1           | 0.049            | 12             | < 3            | 150        |                 | < 4        | < 1             |                 |
| 333           | 4/26/2011   | Kitchen Sink                                 | Valley               | Yes                                                  | < .005          | < .001        | 8.4           | 0.26             | 14.5           | < 3            | 154        |                 | < 4        | < 1             |                 |
| 334           | 4/27/2011   | Well 2                                       | Upland               | Yes                                                  | < .005          | < .001        | 13.5          | 0.32             | 27.5           | < 3            | 204        |                 | < 4        | < 1             |                 |
| 335           | 4/28/2011   | Basement Pressure Tank                       | Valley               | Yes                                                  | < .005          | < .001        | 14.7          | 0.094            | 13.7           | < 3            | 150        |                 | 15.2       | 14.9            |                 |
| 336           | 4/28/2011   | Pressure Tank In Basement On E Side Of House | Valley               | Yes                                                  | < .005          | < .001        | 12.6          | 0.12             | 12.3           | < 3            | 162        |                 | < 4        | < 1             |                 |
| 337           | 5/2/2011    |                                              | Upland               | Yes                                                  | <0.005          | <0.001        | 10.1          | 1.3              | 13.8           | <3             | 130        |                 | <4         | <1              |                 |
| 338           | 5/2/2011    |                                              | Upland               | Yes                                                  | <0.005          | <0.001        | 24.5          | 0.071            | 14             | <3             | 108        |                 | <4         | <1              |                 |
| 339           | 5/3/2011    | Kitchen Sink                                 | Valley               | Yes                                                  | < .005          | < .001        | 10.4          | 0.27             | 15.9           | < 3            | 212        |                 | < 4        | < 1             |                 |
| 340           | 5/4/2011    | Kitchen Cwt                                  | Valley               | Yes                                                  | < .005          | < .001        | 6.8           | 0.17             | 9.8            | < 3            | 248        |                 | < 4        | < 1             |                 |
| 341           | 5/4/2011    | Kitchen Sink                                 | Valley               | Yes                                                  | < .005          | < .001        | 6.5           | 0.19             | 15.1           | < 3            | 218        |                 | < 4        | < 1             |                 |
| 342           | 5/4/2011    | Outside Hose Bib On The East Side Of Home    | Valley               | Yes                                                  | < .005          | < .001        | 16.4          | 0.25             | 12.8           | < 3            | 337        |                 | < 4        | 2.2             |                 |
| 343           | 5/4/2011    | Outdoor Spigot                               | Valley               | Yes                                                  | < .005          | < .001        | 9.9           | 0.2              | 12.9           | < 3            | 242        |                 | < 4        | < 1             |                 |
| 344           | 2/26/2009   | Kitchen Sink                                 | Upland               |                                                      |                 |               |               | 0.225            |                | < 1            | 80         |                 | < 2        |                 |                 |

Table S.8. Groundwater Quality Data for 1701 "Pre-Drill" Water Well Samples from Susquehanna County, Pennsylvania

| Water Well ID | Sample Date | Sampling Port                   | Topographic Location | Gas Extraction Area (Within 1 km of Active Gas Well) | Selenium (mg/L) | Silver (mg/L) | Sodium (mg/L) | Strontium (mg/L) | Sulfate (mg/L) | Sulfide (mg/L) | TDS (mg/L) | Thallium (mg/L) | TSS (mg/L) | Turbidity (NTU) | Vanadium (mg/L) |
|---------------|-------------|---------------------------------|----------------------|------------------------------------------------------|-----------------|---------------|---------------|------------------|----------------|----------------|------------|-----------------|------------|-----------------|-----------------|
| 345           | 5/4/2011    | School Art Studio Bathroom Sink | Valley               | Yes                                                  | < .005          | < .001        | 11.4          | 0.29             | 15.3           | < 3            | 284        |                 | < 4        | 3.2             |                 |
| 346           | 5/4/2011    | Pressure Tank                   | Valley               | Yes                                                  | < .005          | < .001        | 11.1          | 0.21             | 14.2           | < 3            | 282        |                 | 6          | 21.4            |                 |
| 347           | 5/5/2011    | Kitchen Sink Cwt                | Upland               | Yes                                                  | < .005          | < .001        | 44.6          | 0.057            | 29.9           | 0.64           | 248        |                 | < 4        | < 1             |                 |
| 348           | 5/5/2011    | Kitchen Sink                    | Valley               | Yes                                                  | < .005          | < .001        | 29.2          | 0.12             | 24.5           | < 3            | 227        |                 | < 4        | < 1             |                 |
| 349           | 5/5/2011    | Pressure Tank                   | Valley               | Yes                                                  | < .005          | < .001        | 17.9          | 0.078            | 20.3           | < 3            | 257        |                 | 4          | 10.6            |                 |
| 350           | 5/5/2011    | Kitchen Sink Cwt                | Valley               | Yes                                                  | < .005          | < .001        | 11.4          | 0.067            | 15             | < 3            | 175        |                 | < 4        | < 1             |                 |
| 351           | 5/5/2011    | Pressure Tank                   | Valley               | Yes                                                  | < .005          | < .001        | 21.1          | 0.21             | 21.5           | < 3            | 225        |                 | < 4        | 10.1            |                 |
| 352           | 5/6/2011    | Pressure Tank                   | Valley               | Yes                                                  | < .005          | < .001        | 23.5          | 0.11             | 14.8           | < 3            | 219        |                 | < 4        | 1.3             |                 |
| 353           | 5/6/2011    | Kitchen Sink                    | Valley               | Yes                                                  | < .005          | < .001        | 9.1           | 0.55             | 17.4           | < 3            | 144        |                 | < 4        | < 1             |                 |
| 354           | 5/7/2011    | Pressure Tank In Basement       | Valley               | Yes                                                  | < .005          | < .001        | 12.7          | 0.43             | 12.8           | < 3            | 217        |                 | 4.8        | 24.1            |                 |
| 355           | 5/7/2011    | Bathroom Sink Ctw               | Valley               | Yes                                                  | < .005          | < .001        | 17.1          | 0.2              | 20.4           | < 3            | 256        |                 | < 4        | < 1             |                 |
| 356           | 5/7/2011    | Backroom Sink                   | Valley               | Yes                                                  | < .005          | < .001        | 11.8          | 0.19             | 12.7           | < 3            | 220        |                 | < 4        | 3               |                 |
| 357           | 5/7/2011    | Pressure Tank In Basement       | Upland               | Yes                                                  | < .005          | < .001        | 19.9          | 0.19             | 21.4           | < 3            | 222        |                 | < 4        | < 1             |                 |
| 358           | 5/7/2011    | Kitchen Sink                    | Valley               | Yes                                                  | < .005          | < .001        | 14.4          | 0.14             | 16.1           | < 3            | 574        |                 | < 4        | 2.4             |                 |
| 359           | 5/7/2011    | Pressure Tank                   | Valley               | Yes                                                  | < .005          | < .001        | 10.6          | 0.08             | 21             | < 3            | 233        |                 | < 4        | < 1             |                 |
| 360           | 5/9/2011    | Pressure Tank                   | Valley               | Yes                                                  | < .005          | < .001        | 13.9          | 0.092            | 16.7           | < 3            | 190        |                 | < 4        | 3.2             |                 |
| 361           | 5/9/2011    | Basement Pressure Tank          | Valley               | Yes                                                  | < .005          | < .001        | 15.8          | 0.17             | 18.8           | < 3            | 179        |                 | 8.4        | 28.9            |                 |
| 362           | 5/9/2011    | Well                            | Valley               | Yes                                                  | < .005          | < .001        | 20.6          | 0.041            | 20.4           | < 3            | 147        |                 | < 4        | < 1             |                 |
| 363           | 5/9/2011    | Kitchen Sink                    | Valley               | Yes                                                  | < .005          | < .001        | 14.9          | 0.23             | 19.9           | < 3            | 242        |                 | < 4        | < 1             |                 |

Table S.8. Groundwater Quality Data for 1701 "Pre-Drill" Water Well Samples from Susquehanna County, Pennsylvania

| Water Well ID | Sample Date | Sampling Port                                 | Topographic Location | Gas Extraction Area (Within 1 km of Active Gas Well) | Selenium (mg/L) | Silver (mg/L) | Sodium (mg/L) | Strontium (mg/L) | Sulfate (mg/L) | Sulfide (mg/L) | TDS (mg/L) | Thallium (mg/L) | TSS (mg/L) | Turbidity (NTU) | Vanadium (mg/L) |
|---------------|-------------|-----------------------------------------------|----------------------|------------------------------------------------------|-----------------|---------------|---------------|------------------|----------------|----------------|------------|-----------------|------------|-----------------|-----------------|
| 364           | 5/9/2011    | Outdoor Hose Bib On South Side Of Gas Station | Valley               | Yes                                                  | < .005          | < .001        | 20.1          | 0.14             | 16             | < 3            | 215        |                 | < 4        | 1.9             |                 |
| 365           | 5/9/2011    | Outside Spigot                                | Valley               | Yes                                                  | < .005          | < .001        | 12.2          | 0.39             | 15.9           | < 3            | 171        |                 | < 4        | < 1             |                 |
| 366           | 5/9/2011    | Pressure Tank                                 | Upland               | Yes                                                  | < .005          | < .001        | 11.6          | 0.058            | 15.8           | < 3            | 161        |                 | 6          | 31.3            |                 |
| 367           | 5/9/2011    | Pressure Tank                                 | Valley               | Yes                                                  | < .005          | < .001        | 18.3          | 0.075            | 21.1           | < 3            | 208        |                 | < 4        | < 1             |                 |
| 368           | 5/9/2011    | Outside Faucet                                | Valley               | Yes                                                  | < .005          | < .001        | 19.3          | 0.14             | 15.1           | < 3            | 187        |                 | < 4        | 5.9             |                 |
| 369           | 5/10/2011   | Kitchen Sink                                  | Upland               | Yes                                                  | < .005          | < .001        | 12            | 0.053            | 8.3            | < 3            | 91         |                 | < 4        | 3.3             |                 |
| 370           | 5/10/2011   | Inside Faucet                                 | Valley               | Yes                                                  | < .005          | < .001        | 16.4          | 0.11             | 12.7           | < 3            | 235        |                 | < 4        | 3               |                 |
| 371           | 5/10/2011   | Inside Faucet                                 | Valley               | Yes                                                  | < .005          | < .001        | 15.9          | 0.14             | 13.6           | < 3            | 224        |                 | < 4        | 1.2             |                 |
| 372           | 5/11/2011   |                                               | Valley               | Yes                                                  | < .005          | < .001        | 13.8          | 0.028            | 9.6            | < 3            | 144        |                 | 6.4        | 5.9             |                 |
| 373           | 5/11/2011   | Pressure Tank In Basement                     | Valley               | Yes                                                  | < .005          | < .001        | 24            | 0.23             | 15.1           | 0.96           | 245        |                 | < 4        | 6.2             |                 |
| 374           | 5/11/2011   |                                               | Valley               | Yes                                                  | < .005          | < .001        | 19.1          | 0.081            | 13.2           | 1.2            | 247        |                 | < 4        | 2.8             |                 |
| 375           | 5/11/2011   | Kitchen Sink                                  | Valley               | Yes                                                  | < .005          | < .001        | 11.2          | 0.044            | 12.4           | 0.88           | 171        |                 | < 4        | 1               |                 |
| 376           | 5/11/2011   | Outside Bib                                   | Valley               | Yes                                                  | < .005          | < .001        | 16.1          | 0.33             | 19.8           | 0.64           | 234        |                 | < 4        | 1.2             |                 |
| 377           | 5/11/2011   | Kitchen Sink                                  | Valley               | Yes                                                  | < .005          | < .001        | 12.4          | 0.19             | 17.6           | 0.96           | 233        |                 | < 4        | 3.6             |                 |
| 378           | 5/11/2011   | Pressure Tank In Basement                     | Valley               | Yes                                                  | < .005          | < .001        | 21.5          | 0.09             | 17.8           | 0.72           | 266        |                 | < 4        | 1.2             |                 |
| 379           | 5/12/2011   |                                               | Valley               | Yes                                                  | < .005          | < .001        | 9.9           | 0.26             | 15.8           | < 3            | 188        |                 | < 4        | 1.5             |                 |

Table S.8. Groundwater Quality Data for 1701 "Pre-Drill" Water Well Samples from Susquehanna County, Pennsylvania

| Water Well ID | Sample Date | Sampling Port                        | Topographic Location | Gas Extraction Area (Within 1 km of Active Gas Well) | Selenium (mg/L) | Silver (mg/L) | Sodium (mg/L) | Strontium (mg/L) | Sulfate (mg/L) | Sulfide (mg/L) | TDS (mg/L) | Thallium (mg/L) | TSS (mg/L) | Turbidity (NTU) | Vanadium (mg/L) |
|---------------|-------------|--------------------------------------|----------------------|------------------------------------------------------|-----------------|---------------|---------------|------------------|----------------|----------------|------------|-----------------|------------|-----------------|-----------------|
| 380           | 5/12/2011   | Outside Faucet                       | Valley               | Yes                                                  | < .005          | < .001        | 17            | 0.053            | 12.9           | < 3            | 203        |                 | < 4        | < 1             |                 |
| 381           | 5/12/2011   | Basement At Pressure Tank            | Valley               | Yes                                                  | < .005          | < .001        | 11.6          | 0.1              | 15.6           | < 3            | 164        |                 | < 4        | < 1             |                 |
| 382           | 5/12/2011   | Pressure Tank                        | Valley               | Yes                                                  | < .005          | < .001        | 178           | 0.19             | 19.3           | < 3            | 1090       |                 | < 4        | 3.5             |                 |
| 383           | 5/12/2011   | Kitchen Sink                         | Valley               | Yes                                                  | < .005          | < .001        | 19.9          | 0.13             | 16.3           | < 3            | 227        |                 | < 4        | 1.3             |                 |
| 384           | 5/13/2011   | Pressure Tank Rental Property        | Valley               | Yes                                                  | < .005          | < .001        | 27            | 0.065            | 21.5           | < 3            | 241        |                 | < 4        | < 1             |                 |
| 385           | 5/13/2011   | Pressure Tank                        | Valley               | Yes                                                  | < .005          | < .001        | 15.1          | 0.26             | 19.6           | < 3            | 191        |                 | < 4        | < 1             |                 |
| 386           | 5/13/2011   | Kitchen Sink                         | Valley               | Yes                                                  | < .005          | < .001        | 19.8          | 0.053            | 10.3           | < 3            | 176        |                 | < 4        | < 1             |                 |
| 387           | 5/13/2011   | Outside Faucet                       | Valley               | Yes                                                  | < .005          | < .001        | 27.5          | 0.47             | 25.4           | < 3            | 262        |                 | < 4        | 3               |                 |
| 388           | 1/31/2011   | Kitchen Sink                         | Valley               |                                                      | < .002          | < .001        | 10            | 0.17             | 9              | < 1            | 140        |                 | < 2        | < 1             |                 |
| 389           | 1/8/2011    | Kitchen Sink                         | Upland               | Yes                                                  | < .002          | < .001        | 8.9           | 0.68             | 8              | < 1            | 167        |                 | < 2        | < 1             |                 |
| 390           | 1/8/2011    | Kitchen Sink                         | Valley               |                                                      | < .002          | < .001        | 2.4           | 0.044            | 6              | < 1            | 80         |                 | < 2        | 2               |                 |
| 391           | 1/4/2011    | Kitchen Sink                         | Valley               | Yes                                                  | < .002          | < .001        | 6.4           | 0.038            | 12             | < 1            | 133        |                 | < 2        | 1               |                 |
| 392           | 2/17/2011   | Outside Spigot                       | Upland               |                                                      | < .002          | < .001        | 82            | 0.19             | 5              | < 1            | 187        |                 | < 2        | < 1             |                 |
| 393           | 2/22/2011   | Kitchen Sink                         | Upland               | Yes                                                  | < .002          | < .001        | 14            | 1.3              | 19             | < 1            | 227        |                 | < 2        | < 1             |                 |
| 394           | 2/22/2011   | Pressure Tank In Barn, Old Milkhouse | Upland               |                                                      | < .002          | < .001        | 13            | 0.45             | 24             | < 1            | 173        |                 | < 2        | 1               |                 |
| 395           | 2/22/2011   | Rental Kitchen Sink                  | Upland               |                                                      | < .002          | < .001        | 34            | 0.63             | 34             | < 1            | 273        |                 | < 2        | 1               |                 |
| 396           | 1/8/2011    | Basement At Pressure Tank            | Valley               | Yes                                                  | < .002          | < .001        | 4.7           | 0.24             | 11             | < 1            | 120        |                 | 6.4        | 4               |                 |
| 397           | 1/31/2011   | Kitchen Sink                         | Valley               |                                                      | < .002          | < .001        | 2.4           | 0.039            | < 5            | < 1            | 72         |                 | 35         | < 1             |                 |

Table S.8. Groundwater Quality Data for 1701 "Pre-Drill" Water Well Samples from Susquehanna County, Pennsylvania

| Water Well ID | Sample Date | Sampling Port                       | Topographic Location | Gas Extraction Area (Within 1 km of Active Gas Well) | Selenium (mg/L) | Silver (mg/L) | Sodium (mg/L) | Strontium (mg/L) | Sulfate (mg/L) | Sulfide (mg/L) | TDS (mg/L) | Thallium (mg/L) | TSS (mg/L) | Turbidity (NTU) | Vanadium (mg/L) |
|---------------|-------------|-------------------------------------|----------------------|------------------------------------------------------|-----------------|---------------|---------------|------------------|----------------|----------------|------------|-----------------|------------|-----------------|-----------------|
| 398           | 1/9/2011    | Hand Dug Well West Of House         | Upland               | Yes                                                  | < .002          | < .001        | 2             | 0.022            | 13             | < 1            | 44         |                 | 11.6       | 12              |                 |
| 399           | 1/4/2011    | Pressure Tank                       | Upland               |                                                      | < .002          | < .001        | 8.4           | 0.22             | 9              | < 1            | 166        |                 | < 2        | < 1             |                 |
| 400           | 3/12/2009   | Kitchen Sink                        | Valley               |                                                      |                 |               |               | 0.543            |                | < 1            | 128        |                 | 2          |                 |                 |
| 401           | 1/31/2011   | Kitchen Sink                        | Upland               | Yes                                                  | < .002          | < .001        | 9.4           | 0.11             | < 5            | < 1            | 180        |                 | 3          | < 1             |                 |
| 402           | 2/22/2011   | Upstairs Kitchen Sink               | Upland               |                                                      | < .002          | < .001        | 18            | 0.16             | 9              | < 1            | 113        |                 | < 2        | 1               |                 |
| 403           | 1/31/2011   | Kitchen Sink                        | Upland               | Yes                                                  | < .002          | < .001        | 4.7           | 0.094            | < 5            | < 1            | 140        |                 | < 2        | < 1             |                 |
| 404           | 1/31/2011   | Kitchen Sink                        | Upland               |                                                      | < .002          | < .001        | 71            | 0.64             | < 5            | < 1            | 208        |                 | < 2        | < 1             |                 |
| 405           | 1/4/2011    | Hand Dug Well                       | Upland               |                                                      | < .002          | < .001        | 1             | 0.01             | 7              | < 1            | 60         |                 | 2.4        | 1               |                 |
| 406           | 2/22/2011   | Basement Of Rental At Pressure Tank | Upland               |                                                      | < .002          | < .001        | 34            | 0.21             | < 5            | < 1            | 227        |                 | 3.2        | 3               |                 |
| 407           | 1/8/2011    | Basement At Pressure Tank           | Upland               |                                                      | < .002          | < .001        | 4.6           | 0.086            | 9              | < 1            | 128        |                 | 4.4        | < 1             |                 |
| 408           | 1/8/2011    | Kithcen Sink                        | Upland               |                                                      | < .002          | < .001        | 4.7           | 0.053            | 10             | < 1            | 120        |                 | < 2        | < 1             |                 |
| 409           | 1/14/2011   | Laundry Room Sink                   | Upland               |                                                      | < .002          | < .001        | 7             | 0.2              | 9              | < 1            | 148        |                 | 2.8        | < 1             |                 |
| 410           | 3/12/2009   | Kitchen Sink                        | Valley               |                                                      |                 |               |               | 0.32             |                | < 1            | 136        |                 | < 2        |                 |                 |
| 411           | 1/31/2011   | Kitchen Sink                        | Valley               |                                                      | < .002          | < .001        | 28            | 0.48             | < 5            | < 1            | 148        |                 | < 2        | < 1             |                 |
| 412           | 2/22/2011   | Breakroom Sink- Lower Level         | Upland               |                                                      | < .002          | < .001        | 18            | 1.2              | 13             | < 1            | 213        |                 | < 2        | < 1             |                 |
| 413           | 3/16/2009   | Kitchen Sink                        | Valley               |                                                      |                 |               |               | 0.584            |                | < 1            | 173        |                 | < 2        |                 |                 |
| 414           | 1/8/2011    | Kitchen Sink                        | Valley               | Yes                                                  | < .002          | < .001        | 22            | 0.089            | 10             | < 1            | 176        |                 | < 2        | 7               |                 |
| 415           | 1/4/2011    | Kitchen Sink                        | Upland               |                                                      | < .002          | < .001        | 3.3           | 0.11             | 8              | < 1            | 86.7       |                 | < 2        | 2               |                 |
| 416           | 1/31/2011   | Kitchen Sink                        | Valley               | Yes                                                  | < .002          | < .001        | 4.8           | 0.22             | < 5            | < 1            | 104        |                 | < 2        | < 1             |                 |
| 417           | 1/10/2011   | Hand Dug Well                       | Upland               |                                                      | < .002          | < .001        | 2.3           | 0.0027           | 15             | < 1            | 44         |                 | 2.4        | 1               |                 |
| 418           | 2/22/2011   | Kitchen Sink                        | Valley               |                                                      | < .002          | < .001        | 15            | 1.2              | < 5            | < 1            | 73         |                 | < 2        | 1               |                 |

Table S.8. Groundwater Quality Data for 1701 "Pre-Drill" Water Well Samples from Susquehanna County, Pennsylvania

| Water Well ID | Sample Date | Sampling Port                                        | Topographic Location | Gas Extraction Area (Within 1 km of Active Gas Well) | Selenium (mg/L) | Silver (mg/L) | Sodium (mg/L) | Strontium (mg/L) | Sulfate (mg/L) | Sulfide (mg/L) | TDS (mg/L) | Thallium (mg/L) | TSS (mg/L) | Turbidity (NTU) | Vanadium (mg/L) |
|---------------|-------------|------------------------------------------------------|----------------------|------------------------------------------------------|-----------------|---------------|---------------|------------------|----------------|----------------|------------|-----------------|------------|-----------------|-----------------|
| 419           | 1/10/2011   | Kitchen Sink                                         | Valley               |                                                      | < .002          | < .001        | 21            | 1.2              | 15             | < 1            | 232        |                 | < 2        | 1               |                 |
| 420           | 1/4/2011    |                                                      | Upland               |                                                      | < .002          | < .001        | 3.9           | 0.18             | 10             | < 1            | 140        |                 | < 2        | < 1             |                 |
| 421           | 2/17/2011   | Kitchen Faucet On 2Nd Floor                          | Upland               |                                                      | < .002          | < .001        | 4.6           | 0.35             | 12             | < 1            | 87         |                 | < 2        | < 1             |                 |
| 422           | 1/4/2011    |                                                      | Upland               | Yes                                                  | < .002          | < .001        | 19            | 1.7              | < 5            | < 1            | 186        |                 | < 2        | < 1             |                 |
| 423           | 1/7/2011    | Milkhouse Faucet                                     | Valley               | Yes                                                  | < .002          | < .001        | 7.9           | 0.35             | 16             | < 1            | 213        |                 | < 2        | < 1             |                 |
| 424           | 1/7/2011    | Kitchen Sink Rental                                  | Upland               | Yes                                                  | < .002          | < .001        | 8.8           | 1                | 11             | < 1            | 126        |                 | < 2        | 3               |                 |
| 425           | 10/8/2009   |                                                      | Upland               |                                                      |                 |               |               | 0.068            |                | < 2            | 85         |                 | 9.5        |                 |                 |
| 426           | 3/13/2009   | Kitchen Sink                                         | Valley               |                                                      |                 |               |               | 1.44             |                | < 1            | 132        |                 | < 2        |                 |                 |
| 427           | 3/12/2009   | Kitchen Sink                                         | Upland               |                                                      |                 |               |               | 0.044            |                | < 1            | 24         |                 | < 2        |                 |                 |
| 428           | 6/24/2009   |                                                      | Upland               | Yes                                                  |                 |               |               | < .025           |                | < 1            | 165        |                 | < 2        |                 |                 |
| 429           | 3/4/2009    |                                                      | Upland               |                                                      |                 |               |               | 0.063            |                | < 1            | 166        |                 | < 2        |                 |                 |
| 430           | 6/13/2011   | Barn Spigot                                          | Upland               |                                                      |                 |               |               |                  |                |                |            |                 |            |                 |                 |
| 431           | 6/14/2011   | Kitchen Sink Overlooking Road                        | Upland               |                                                      |                 |               |               |                  |                |                |            |                 |            |                 |                 |
| 432           | 6/14/2011   | Pressure Tank                                        | Valley               |                                                      |                 |               |               |                  |                |                |            |                 |            |                 |                 |
| 433           | 6/16/2011   | Kitchen Sink On Island In Kitchen                    | Valley               |                                                      |                 |               |               |                  |                |                |            |                 |            |                 |                 |
| 434           | 6/16/2011   | Kitchen Sink                                         | Valley               |                                                      |                 |               |               |                  |                |                |            |                 |            |                 |                 |
| 435           | 6/16/2011   | In Barn Milkhouse-At Sink                            | Valley               |                                                      |                 |               |               |                  |                |                |            |                 |            |                 |                 |
| 436           | 6/16/2011   | Outside Spigot- Next To Porch At End Of Driveway     | Upland               |                                                      |                 |               |               |                  |                |                |            |                 |            |                 |                 |
| 437           | 6/16/2011   | Kitchen Sink On Lake Road Side Of House Under Window | Valley               |                                                      |                 |               |               |                  |                |                |            |                 |            |                 |                 |
| 438           | 6/17/2011   | Kitchen Sink                                         | Valley               |                                                      |                 |               |               |                  |                |                |            |                 |            |                 |                 |



Table S.8. Groundwater Quality Data for 1701 "Pre-Drill" Water Well Samples from Susquehanna County, Pennsylvania

| Water Well ID | Sample Date | Sampling Port                                         | Topographic Location | Gas Extraction Area (Within 1 km of Active Gas Well) | Selenium (mg/L) | Silver (mg/L) | Sodium (mg/L) | Strontium (mg/L) | Sulfate (mg/L) | Sulfide (mg/L) | TDS (mg/L) | Thallium (mg/L) | TSS (mg/L) | Turbidity (NTU) | Vanadium (mg/L) |
|---------------|-------------|-------------------------------------------------------|----------------------|------------------------------------------------------|-----------------|---------------|---------------|------------------|----------------|----------------|------------|-----------------|------------|-----------------|-----------------|
| 439           | 6/23/2011   | Kitchen Sink                                          | Valley               |                                                      |                 |               |               |                  |                |                |            |                 |            |                 |                 |
| 440           | 6/23/2011   | Pressure Tank                                         | Upland               |                                                      |                 |               |               |                  |                |                |            |                 |            |                 |                 |
| 441           | 6/23/2011   | Pressure Tank                                         | Valley               |                                                      |                 |               |               |                  |                |                |            |                 |            |                 |                 |
| 442           | 6/24/2011   |                                                       | Valley               |                                                      |                 |               |               |                  |                |                |            |                 |            |                 |                 |
| 443           | 6/24/2011   | Kitchen Sink                                          | Upland               |                                                      |                 |               |               |                  |                |                |            |                 |            |                 |                 |
| 444           | 6/24/2011   | Kitchen Sink                                          | Valley               |                                                      |                 |               |               |                  |                |                |            |                 |            |                 |                 |
| 445           | 6/24/2011   | Kitchen Sink                                          | Upland               |                                                      |                 |               |               |                  |                |                |            |                 |            |                 |                 |
| 446           | 6/24/2011   | Shed Spigot                                           | Valley               |                                                      |                 |               |               |                  |                |                |            |                 |            |                 |                 |
| 447           | 6/13/2011   | Kitchen Faucet                                        | Upland               |                                                      |                 |               |               |                  |                |                |            |                 |            |                 |                 |
| 448           | 6/15/2011   | Kitchen Sink Near Rear Of House                       | Upland               |                                                      |                 |               |               |                  |                |                |            |                 |            |                 |                 |
| 449           | 6/15/2011   | Kitchen Sink On South Side Of House                   | Upland               |                                                      |                 |               |               |                  |                |                |            |                 |            |                 |                 |
| 450           | 6/15/2011   | Kitchen Sink On Wall Closest To Red Barn Behind House | Upland               |                                                      |                 |               |               |                  |                |                |            |                 |            |                 |                 |
| 451           | 6/15/2011   | Kitchen Sink                                          | Valley               |                                                      |                 |               |               |                  |                |                |            |                 |            |                 |                 |
| 452           | 6/15/2011   | Outside Spigot- On The North Side Of The Residence    | Upland               |                                                      |                 |               |               |                  |                |                |            |                 |            |                 |                 |
| 453           | 6/15/2011   |                                                       | Upland               |                                                      |                 |               |               |                  |                |                |            |                 |            |                 |                 |
| 454           | 3/25/2009   | Kitchen Sink                                          | Upland               |                                                      |                 |               |               | 0.86             |                | < 1            | 200        |                 | < 2        |                 |                 |
| 455           | 6/27/2011   | Greenhouse Sink                                       | Valley               |                                                      |                 |               |               |                  |                |                |            |                 |            |                 |                 |
| 456           | 4/15/2009   | Kitchen Sink                                          | Valley               |                                                      |                 |               |               | 0.103            |                | < 1            | 84         |                 | < 2        |                 |                 |
| 457           | 4/19/2009   | Basement Pressure Tank                                | Valley               |                                                      |                 |               |               | 0.048            |                | < 1            | 135        |                 | < 2        |                 |                 |
| 458           | 6/13/2011   | Outside Hose Bib                                      | Valley               | Yes                                                  | < .005          | < .001        | 3.2           | 0.051            | 15             | < 3            | 110        |                 | < 4        | 1.7             |                 |

Table S.8. Groundwater Quality Data for 1701 "Pre-Drill" Water Well Samples from Susquehanna County, Pennsylvania

| Water Well ID | Sample Date | Sampling Port                         | Topographic Location | Gas Extraction Area (Within 1 km of Active Gas Well) | Selenium (mg/L) | Silver (mg/L) | Sodium (mg/L) | Strontium (mg/L) | Sulfate (mg/L) | Sulfide (mg/L) | TDS (mg/L) | Thallium (mg/L) | TSS (mg/L) | Turbidity (NTU) | Vanadium (mg/L) |
|---------------|-------------|---------------------------------------|----------------------|------------------------------------------------------|-----------------|---------------|---------------|------------------|----------------|----------------|------------|-----------------|------------|-----------------|-----------------|
| 459           | 6/13/2011   | Outside Cold Water Hose Bib           | Upland               | Yes                                                  | < .005          | < .001        | 15            | 0.16             | 15             | < 3            | 200        |                 | < 4        | < .85           |                 |
| 460           | 6/16/2011   | Bailed Directly From Well             | Upland               |                                                      | < .005          | < .001        | 3.3           | 0.028            | 3.4            | < 3            | 93         |                 | < 4        | 15              |                 |
| 461           | 2/26/2009   | Mary Steele Kitchen Sink              | Valley               |                                                      |                 |               |               | 0.047            |                | < 1            | 70         |                 | < 2        |                 |                 |
| 462           | 6/16/2011   |                                       | Upland               |                                                      | <0.005          | <0.001        | 8.9           | 0.33             | 10             | <3             | 130        |                 | <4         | <0.85           |                 |
| 463           | 6/20/2011   | Kitchen Sink Cwt On Nw Side Of House  | Upland               |                                                      | < .005          | < .001        | 4.4           | 0.054            | 15             | < 3            | 120        |                 | < 4        | < .85           |                 |
| 464           | 6/20/2011   | Well                                  | Upland               |                                                      | < .005          | < .001        | 6.8           | 0.038            | 10             | < 3            | 110        |                 | < 4        | 1.5             |                 |
| 465           | 1/25/2009   |                                       | Valley               |                                                      |                 |               |               | 0.075            |                | < 1            | < 2        |                 | < 2        |                 |                 |
| 466           | 6/20/2011   |                                       | Upland               | Yes                                                  | < .005          | < .001        | 31            | 1.1              | 14             | < 3            | 190        |                 | < 4        | < .85           |                 |
| 467           | 6/21/2011   | At Pressure Tank In Basement          | Upland               | Yes                                                  | < .005          | < .001        | 10            | 0.037            | 9.7            | < 3            | 130        |                 | < 4        | < .85           |                 |
| 468           | 6/22/2011   | Inside Hose Bib Located In The Garage | Valley               |                                                      | <0.005          | <0.001        | 3.1           | 0.096            | 12             | <3             | 93         |                 | <2         | <0.85           |                 |
| 469           | 4/1/2009    |                                       | Valley               |                                                      |                 |               |               | 0.233            |                | < 1            | 112        |                 | < 2        |                 |                 |
| 470           | 6/22/2011   | Outside Hose                          | Valley               |                                                      | < .005          | < .001        | 13            | 0.3              | 10             | < 3            | 160        |                 | < 4        | 1.8             |                 |
| 471           | 6/22/2011   | Well                                  | Valley               | Yes                                                  | < .005          | < .001        | 25            | 0.65             | 30             | < 3            | 220        |                 | < 4        | < .85           |                 |
| 472           | 6/22/2011   | Kitchen Sink Cwt                      | Valley               |                                                      | < .005          | < .001        | 6             | 0.22             | 4.2            | < 3            | 120        |                 | < 4        | 0.95            |                 |
| 473           | 6/23/2011   | Pipe In Basement                      | Upland               |                                                      | < .005          | < .001        | 0.93          | 0.021            | 4.1            | < 3            | 110        |                 | < 4        | 0.97            |                 |
| 474           | 4/1/2009    |                                       | Valley               |                                                      |                 |               |               | 0.105            |                | < 1            | 208        |                 | < 2        |                 |                 |
| 475           | 6/23/2011   | Outside Spigot                        | Valley               |                                                      | < .005          | < .001        | 22            | 0.64             | 15             | < 3            | 160        |                 | < 4        | < .85           |                 |
| 476           | 4/15/2009   | Kitchen Sink                          | Upland               |                                                      |                 |               |               | 2.16             |                | < 1            | 248        |                 | < 2        |                 |                 |
| 477           | 6/24/2011   | Kitchen Sink                          | Valley               |                                                      | < .005          | < .001        | 10            | 0.57             | 8.4            | < 3            | 150        |                 | 53         | 11              |                 |
| 478           | 6/24/2011   | Outside Hose Bib On The W End Of Home | Valley               | Yes                                                  | < .005          | < .001        | 22            | 0.1              | 15             | < 3            | 220        |                 | 6.8        | < .85           |                 |
| 479           | 4/15/2009   | Kitchen Sink                          | Upland               |                                                      |                 |               |               | 2.16             |                | < 1            | 196        |                 | < 2        |                 |                 |

Table S.8. Groundwater Quality Data for 1701 "Pre-Drill" Water Well Samples from Susquehanna County, Pennsylvania

| Water Well ID | Sample Date | Sampling Port                                                                                                                                                      | Topographic Location | Gas Extraction Area (Within 1 km of Active Gas Well) | Selenium (mg/L) | Silver (mg/L) | Sodium (mg/L) | Strontium (mg/L) | Sulfate (mg/L) | Sulfide (mg/L) | TDS (mg/L) | Thallium (mg/L) | TSS (mg/L) | Turbidity (NTU) | Vanadium (mg/L) |
|---------------|-------------|--------------------------------------------------------------------------------------------------------------------------------------------------------------------|----------------------|------------------------------------------------------|-----------------|---------------|---------------|------------------|----------------|----------------|------------|-----------------|------------|-----------------|-----------------|
| 480           | 3/16/2009   | Pressure Tank                                                                                                                                                      | Upland               |                                                      |                 |               |               | 0.458            |                | < 1            | 113        |                 | < 2        |                 |                 |
| 481           | 6/27/2011   | Sample Collected From An Outside Spigot Located On The North Side Of The House.                                                                                    | Valley               |                                                      | < .005          | < .001        | 13            | 0.39             | 8.2            | < 3            | 140        |                 | < 4        | < .85           |                 |
| 482           | 6/27/2011   | Kitchen Sink                                                                                                                                                       | Valley               |                                                      | < .005          | < .001        | 11            | 0.83             | 11             | < 3            | 110        |                 | < 4        | < .85           |                 |
| 483           | 6/28/2011   | Dip Sample Directly From Well. Well Is Located on The South End Of Property Inside Of Electric Fence. It Is Covered With Metal Sheeting And An Old Car Hood Frame. | Upland               |                                                      | < .005          | < .001        | 41            | 0.088            | 3              | < 3            | 260        |                 | < 4        | 1.4             |                 |
| 484           | 6/28/2011   | Kitchen Sink Cwt                                                                                                                                                   | Valley               |                                                      | < .005          | < .001        | 17            | 0.38             | 12             | < 3            | 160        |                 | < 4        | < .85           |                 |
| 485           | 6/29/2011   | Well                                                                                                                                                               | Upland               |                                                      | < .005          | < .001        | 2.4           | 0.096            | 10             | < 3            | 70         |                 | 69         | 60              |                 |
| 486           | 6/29/2011   | Laundry Room Sink                                                                                                                                                  | Valley               |                                                      | < .005          | < .001        | 15            | 0.95             | 14             | < 3            | 150        |                 | < 4        | < .85           |                 |
| 487           | 6/29/2011   | Dug Well                                                                                                                                                           | Valley               |                                                      | < .005          | < .001        | 2.8           | 0.029            | 13             | < 3            | 69         |                 | < 4        | < .85           |                 |
| 488           | 6/29/2011   |                                                                                                                                                                    | Valley               |                                                      | < .005          | < .001        | 3             | 0.046            | 15             | < 3            | 97         |                 | < 4        | < .85           |                 |
| 489           | 6/30/2011   | Pressure Tank                                                                                                                                                      | Upland               |                                                      | < .005          | < .001        | 2.8           | 0.044            | 14             | < 3            | 120        |                 | < 4        | 14              |                 |
| 490           | 7/1/2011    | Outside Hose Bib                                                                                                                                                   | Valley               |                                                      | < .005          | < .001        | 19            | 0.5              | 9.3            | < 3            | 170        |                 | < 4        | 3.2             |                 |
| 491           | 2/12/2009   |                                                                                                                                                                    | Valley               |                                                      |                 |               |               | 0.224            |                | < 1            | 264        |                 | < 2        |                 |                 |
| 492           | 5/7/2009    |                                                                                                                                                                    | Valley               |                                                      |                 |               |               | 0.248            |                | < 1            | 124        |                 | 15.6       |                 |                 |
| 493           | 4/26/2009   |                                                                                                                                                                    | Valley               |                                                      |                 |               |               | 0.468            |                | < 1            | 910        |                 | 2.8        |                 |                 |

Table S.8. Groundwater Quality Data for 1701 "Pre-Drill" Water Well Samples from Susquehanna County, Pennsylvania

| Water Well ID | Sample Date | Sampling Port                                                     | Topographic Location | Gas Extraction Area (Within 1 km of Active Gas Well) | Selenium (mg/L) | Silver (mg/L) | Sodium (mg/L) | Strontium (mg/L) | Sulfate (mg/L) | Sulfide (mg/L) | TDS (mg/L) | Thallium (mg/L) | TSS (mg/L) | Turbidity (NTU) | Vanadium (mg/L) |
|---------------|-------------|-------------------------------------------------------------------|----------------------|------------------------------------------------------|-----------------|---------------|---------------|------------------|----------------|----------------|------------|-----------------|------------|-----------------|-----------------|
| 494           | 7/5/2011    | Kitchen Sink                                                      | Valley               |                                                      | < .005          | < .001        | 6.2           | 0.36             | 13             | < 3            | 120        |                 | < 4        | 0.91            |                 |
| 495           | 7/5/2011    | Samples Collected By Dipping 1 Inch Plastic Bailer Down The Well. | Upland               |                                                      | < .005          | < .001        | 4.1           | 0.11             | 7.6            | < 3            | 120        |                 | 770        | 1700            |                 |
| 496           | 7/5/2011    | Outside Hose Bib On South Of House                                | Valley               |                                                      | < .005          | < .001        | 5.1           | 0.24             | 3.9            | < 3            | 160        |                 | < 4        | 3.6             |                 |
| 497           | 7/6/2011    | Pressure Tank In Basement                                         | Upland               |                                                      | < .005          | < .001        | 6.5           | 0.33             | 11             | < 3            | 150        |                 | < 4        | < .85           |                 |
| 498           | 7/8/2011    | Outside Faucet                                                    | Upland               |                                                      | < .005          | < .001        | 34            | < .005           | 8.4            | < 3            | 140        |                 | < 4        | 1.2             |                 |
| 499           | 5/14/2011   | Kitchen Sink                                                      | Valley               | Yes                                                  | < .005          | < .001        | 18            | 0.63             | 18             | < 3            | 310        |                 | < 4        | < 1             |                 |
| 500           | 5/3/2009    | Bathroom Sink                                                     | Upland               |                                                      |                 |               |               | 0.391            |                | < 1            | 144        |                 | < 2        |                 |                 |
| 501           | 5/19/2011   | Outside Spigot                                                    | Valley               | Yes                                                  | < .005          | < .001        | 27            | 0.055            | 20             | < 3            | 160        |                 | < 4        | < .85           |                 |
| 502           | 5/25/2011   | Pressure Tank                                                     | Valley               | Yes                                                  | < .005          | < .001        | 25            | 0.41             | 19             | < 3            | 250        |                 | < 4        | 7.3             |                 |
| 503           | 5/26/2011   | Pressure Tank                                                     | Valley               | Yes                                                  | < .005          | < .001        | 31            | 0.11             | 32             | < 3            | 330        |                 | < 4        | < .85           |                 |
| 504           | 10/26/2009  |                                                                   | Valley               |                                                      |                 |               |               | 0.155            |                | < 1            | 128        |                 | < 2        |                 |                 |
| 505           | 5/26/2011   | Outside Hose Bib Cold                                             | Valley               | Yes                                                  | < .005          | < .001        | 14            | 0.2              | 16             | < 3            | 270        |                 | < 4        | < .85           |                 |
| 506           | 10/26/2009  |                                                                   | Valley               | Yes                                                  |                 |               |               | 0.316            |                | < 1            | 147        |                 | < 2        |                 |                 |
| 507           | 6/1/2011    | Outside Hose                                                      | Upland               |                                                      | < .005          | < .001        | 24            | 0.061            | 12             | < 3            | 230        |                 | 15         | 66              |                 |
| 508           | 6/1/2011    | Pressure Tank                                                     | Valley               |                                                      | < .005          | < .001        | 12            | 0.14             | 10             | < 3            | 180        |                 | < 4        | < .85           |                 |
| 509           | 6/2/2011    | Pressure Tank In Old Creamery                                     | Upland               |                                                      | < .005          | < .001        | 5             | 0.08             | 9.5            | < 3            | 88         |                 | < 4        | < 1             |                 |
| 510           | 10/26/2009  | Pressure Tank                                                     | Valley               | Yes                                                  |                 |               |               | 0.525            |                | < 1            | 113        |                 | < 2        |                 |                 |
| 511           | 6/6/2011    | Dug Well 20 Feet From Se Corner Of House                          | Upland               |                                                      | < .005          | < .001        | 9.7           | 0.11             | 26             | < 3            | 250        |                 | < 4        | 3.5             |                 |
| 512           | 10/26/2009  | Pressure Tank                                                     | Upland               | Yes                                                  |                 |               |               | 0.148            |                | < 1            | 207        |                 | < 2        |                 |                 |

Table S.8. Groundwater Quality Data for 1701 "Pre-Drill" Water Well Samples from Susquehanna County, Pennsylvania

| Water Well ID | Sample Date | Sampling Port                                                         | Topographic Location | Gas Extraction Area (Within 1 km of Active Gas Well) | Selenium (mg/L) | Silver (mg/L) | Sodium (mg/L) | Strontium (mg/L) | Sulfate (mg/L) | Sulfide (mg/L) | TDS (mg/L) | Thallium (mg/L) | TSS (mg/L) | Turbidity (NTU) | Vanadium (mg/L) |
|---------------|-------------|-----------------------------------------------------------------------|----------------------|------------------------------------------------------|-----------------|---------------|---------------|------------------|----------------|----------------|------------|-----------------|------------|-----------------|-----------------|
| 513           | 6/13/2011   | Kitchen Sink                                                          | Valley               |                                                      |                 |               |               |                  |                |                |            |                 |            |                 |                 |
| 514           | 6/13/2011   | Hand Dug Well                                                         | Upland               |                                                      |                 |               |               |                  |                |                |            |                 |            |                 |                 |
| 515           | 6/13/2011   | Main Kitchen Sink                                                     | Upland               |                                                      |                 |               |               |                  |                |                |            |                 |            |                 |                 |
| 516           | 6/13/2011   | Basement Pressure Tank                                                | Valley               |                                                      |                 |               |               |                  |                |                |            |                 |            |                 |                 |
| 517           | 6/13/2011   | Exterior Faucet On South Side Of House Between Two Green Garage Doors | Upland               |                                                      |                 |               |               |                  |                |                |            |                 |            |                 |                 |
| 518           | 6/14/2011   | Kitchen Sink                                                          | Valley               |                                                      |                 |               |               |                  |                |                |            |                 |            |                 |                 |
| 519           | 6/14/2011   | Kitchen Sink                                                          | Upland               |                                                      |                 |               |               |                  |                |                |            |                 |            |                 |                 |
| 520           | 6/14/2011   | Pressure Tank                                                         | Upland               |                                                      |                 |               |               |                  |                |                |            |                 |            |                 |                 |
| 521           | 6/14/2011   | Kitchen Sink                                                          | Valley               |                                                      |                 |               |               |                  |                |                |            |                 |            |                 |                 |
| 522           | 10/26/2009  | Basement At Pressure Tank                                             | Upland               | Yes                                                  |                 |               |               | 0.385            |                | < 1            | 160        |                 | < 2        |                 |                 |
| 523           | 6/14/2011   | Kitchen Faucet                                                        | Valley               |                                                      |                 |               |               |                  |                |                |            |                 |            |                 |                 |
| 524           | 6/14/2011   | Kitchen Sink                                                          | Valley               |                                                      |                 |               |               |                  |                |                |            |                 |            |                 |                 |
| 525           | 6/14/2011   | Kitchen Sink                                                          | Upland               |                                                      |                 |               |               |                  |                |                |            |                 |            |                 |                 |
| 526           | 6/14/2011   | Kitchen Sink                                                          | Valley               |                                                      |                 |               |               |                  |                |                |            |                 |            |                 |                 |
| 527           | 6/14/2011   | Pressure Tank                                                         | Valley               |                                                      |                 |               |               |                  |                |                |            |                 |            |                 |                 |
| 528           | 6/15/2011   |                                                                       | Upland               |                                                      |                 |               |               |                  |                |                |            |                 |            |                 |                 |
| 529           | 6/15/2011   | Kitchen Sink                                                          | Upland               |                                                      |                 |               |               |                  |                |                |            |                 |            |                 |                 |
| 530           | 6/15/2011   | Spigot At Well House                                                  | Upland               |                                                      |                 |               |               |                  |                |                |            |                 |            |                 |                 |
| 531           | 6/15/2011   | Kitchen Sink                                                          | Upland               |                                                      |                 |               |               |                  |                |                |            |                 |            |                 |                 |
| 532           | 6/15/2011   | Kitchen Sink                                                          | Upland               |                                                      |                 |               |               |                  |                |                |            |                 |            |                 |                 |
| 533           | 6/15/2011   | Kitchen Sink                                                          | Upland               |                                                      |                 |               |               |                  |                |                |            |                 |            |                 |                 |

Table S.8. Groundwater Quality Data for 1701 "Pre-Drill" Water Well Samples from Susquehanna County, Pennsylvania

| Water Well ID | Sample Date | Sampling Port                                          | Topographic Location | Gas Extraction Area (Within 1 km of Active Gas Well) | Selenium (mg/L) | Silver (mg/L) | Sodium (mg/L) | Strontium (mg/L) | Sulfate (mg/L) | Sulfide (mg/L) | TDS (mg/L) | Thallium (mg/L) | TSS (mg/L) | Turbidity (NTU) | Vanadium (mg/L) |
|---------------|-------------|--------------------------------------------------------|----------------------|------------------------------------------------------|-----------------|---------------|---------------|------------------|----------------|----------------|------------|-----------------|------------|-----------------|-----------------|
| 534           | 6/16/2011   | Kitchen Sink                                           | Upland               |                                                      |                 |               |               |                  |                |                |            |                 |            |                 |                 |
| 535           | 6/16/2011   | Pressure Tank                                          | Valley               |                                                      |                 |               |               |                  |                |                |            |                 |            |                 |                 |
| 536           | 6/16/2011   | Kitchen Sink Overlooking Blanding Road                 | Upland               |                                                      |                 |               |               |                  |                |                |            |                 |            |                 |                 |
| 537           | 6/16/2011   | Kitchen Sink On South Side Of House                    | Upland               |                                                      |                 |               |               |                  |                |                |            |                 |            |                 |                 |
| 538           | 6/16/2011   | Kitchen Sink                                           | Upland               |                                                      |                 |               |               |                  |                |                |            |                 |            |                 |                 |
| 539           | 6/16/2011   | Kitchen Sink                                           | Upland               |                                                      |                 |               |               |                  |                |                |            |                 |            |                 |                 |
| 540           | 6/16/2011   | Wellhead From Hose                                     | Upland               |                                                      |                 |               |               |                  |                |                |            |                 |            |                 |                 |
| 541           | 6/16/2011   | Kitchen Sink                                           | Valley               |                                                      |                 |               |               |                  |                |                |            |                 |            |                 |                 |
| 542           | 6/17/2011   | Kitchen Sink                                           | Upland               |                                                      |                 |               |               |                  |                |                |            |                 |            |                 |                 |
| 543           | 6/17/2011   | Pressure Tank In Basement On Tingley Lake Side Of Road | Valley               |                                                      |                 |               |               |                  |                |                |            |                 |            |                 |                 |
| 544           | 6/20/2011   | Pressure Tank                                          | Valley               |                                                      |                 |               |               |                  |                |                |            |                 |            |                 |                 |
| 545           | 6/21/2011   | Kitchen Sink                                           | Valley               |                                                      |                 |               |               |                  |                |                |            |                 |            |                 |                 |
| 546           | 6/21/2011   | Kitchen Sink                                           | Upland               |                                                      |                 |               |               |                  |                |                |            |                 |            |                 |                 |
| 547           | 6/21/2011   | Kitchen Sink                                           | Upland               |                                                      |                 |               |               |                  |                |                |            |                 |            |                 |                 |
| 548           | 4/26/2009   | Kitchen Sink                                           | Valley               |                                                      |                 |               |               | 0.271            |                | < 1            | 85         |                 | < 2        |                 |                 |
| 549           | 6/21/2011   | Kitchen Sink                                           | Upland               |                                                      |                 |               |               |                  |                |                |            |                 |            |                 |                 |
| 550           | 6/21/2011   |                                                        | Valley               |                                                      |                 |               |               |                  |                |                |            |                 |            |                 |                 |
| 551           | 6/22/2011   | Kitchen Sink                                           | Upland               |                                                      |                 |               |               |                  |                |                |            |                 |            |                 |                 |
| 552           | 6/22/2011   | Basement Pressure Tank                                 | Valley               |                                                      |                 |               |               |                  |                |                |            |                 |            |                 |                 |
| 553           | 6/22/2011   | Kitchen Sink                                           | Upland               |                                                      |                 |               |               |                  |                |                |            |                 |            |                 |                 |
| 554           | 6/22/2011   | Kitchen Sink                                           | Valley               |                                                      |                 |               |               |                  |                |                |            |                 |            |                 |                 |

Table S.8. Groundwater Quality Data for 1701 "Pre-Drill" Water Well Samples from Susquehanna County, Pennsylvania

| Water Well ID | Sample Date | Sampling Port              | Topographic Location | Gas Extraction Area (Within 1 km of Active Gas Well) | Selenium (mg/L) | Silver (mg/L) | Sodium (mg/L) | Strontium (mg/L) | Sulfate (mg/L) | Sulfide (mg/L) | TDS (mg/L) | Thallium (mg/L) | TSS (mg/L) | Turbidity (NTU) | Vanadium (mg/L) |
|---------------|-------------|----------------------------|----------------------|------------------------------------------------------|-----------------|---------------|---------------|------------------|----------------|----------------|------------|-----------------|------------|-----------------|-----------------|
| 555           | 6/22/2011   |                            | Upland               |                                                      |                 |               |               |                  |                |                |            |                 |            |                 |                 |
| 556           | 6/22/2011   | Kitchen Sink               | Upland               |                                                      |                 |               |               |                  |                |                |            |                 |            |                 |                 |
| 557           | 6/23/2011   | Pressure Tank              | Valley               |                                                      |                 |               |               |                  |                |                |            |                 |            |                 |                 |
| 558           | 6/23/2011   | Pressure Tank              | Valley               |                                                      |                 |               |               |                  |                |                |            |                 |            |                 |                 |
| 559           | 6/23/2011   | Kitchen Sink               | Valley               |                                                      |                 |               |               |                  |                |                |            |                 |            |                 |                 |
| 560           | 6/23/2011   | Kitchen Sink               | Valley               |                                                      |                 |               |               |                  |                |                |            |                 |            |                 |                 |
| 561           | 6/23/2011   |                            | Valley               |                                                      |                 |               |               |                  |                |                |            |                 |            |                 |                 |
| 562           | 6/23/2011   |                            | Upland               |                                                      |                 |               |               |                  |                |                |            |                 |            |                 |                 |
| 563           | 10/27/2009  | Kitchen Sink - Ann'S House | Valley               | Yes                                                  |                 |               |               | 0.134            |                | < 1            | 170        |                 | < 2        |                 |                 |
| 564           | 6/24/2011   | Spigot                     | Upland               |                                                      |                 |               |               |                  |                |                |            |                 |            |                 |                 |
| 565           | 6/24/2011   | Kitchen Sink               | Upland               |                                                      |                 |               |               |                  |                |                |            |                 |            |                 |                 |
| 566           | 6/24/2011   | Kitchen Sink               | Upland               |                                                      |                 |               |               |                  |                |                |            |                 |            |                 |                 |
| 567           | 6/24/2011   | Kitchen Sink               | Upland               |                                                      |                 |               |               |                  |                |                |            |                 |            |                 |                 |
| 568           | 6/24/2011   | Kitchen Sink               | Valley               |                                                      |                 |               |               |                  |                |                |            |                 |            |                 |                 |
| 569           | 6/24/2011   | Kitchen Sink               | Valley               |                                                      |                 |               |               |                  |                |                |            |                 |            |                 |                 |
| 570           | 6/24/2011   | Kitchen Sink               | Upland               |                                                      |                 |               |               |                  |                |                |            |                 |            |                 |                 |
| 571           | 6/24/2011   | Kitchen Sink               | Upland               |                                                      |                 |               |               |                  |                |                |            |                 |            |                 |                 |
| 572           | 6/24/2011   |                            | Upland               |                                                      |                 |               |               |                  |                |                |            |                 |            |                 |                 |
| 573           | 6/27/2011   | Kitchen Sink               | Valley               |                                                      |                 |               |               |                  |                |                |            |                 |            |                 |                 |
| 574           | 6/27/2011   |                            | Valley               |                                                      |                 |               |               |                  |                |                |            |                 |            |                 |                 |
| 575           | 6/27/2011   | House Kitchen Sink         | Valley               |                                                      |                 |               |               |                  |                |                |            |                 |            |                 |                 |
| 576           | 6/27/2011   |                            | Valley               |                                                      |                 |               |               |                  |                |                |            |                 |            |                 |                 |
| 577           | 6/27/2011   | Kitchen Sink               | Upland               |                                                      |                 |               |               |                  |                |                |            |                 |            |                 |                 |
| 578           | 6/27/2011   | Kitchen Sink               | Upland               |                                                      |                 |               |               |                  |                |                |            |                 |            |                 |                 |
| 579           | 6/27/2011   | Outside Spigot             | Valley               |                                                      |                 |               |               |                  |                |                |            |                 |            |                 |                 |
| 580           | 6/28/2011   | Kitchen Sink               | Valley               |                                                      |                 |               |               |                  |                |                |            |                 |            |                 |                 |
| 581           | 6/28/2011   |                            | Upland               |                                                      |                 |               |               |                  |                |                |            |                 |            |                 |                 |
| 582           | 6/28/2011   | Outside Spigot             | Upland               |                                                      |                 |               |               |                  |                |                |            |                 |            |                 |                 |
| 583           | 6/28/2011   |                            | Valley               |                                                      |                 |               |               |                  |                |                |            |                 |            |                 |                 |

Table S.8. Groundwater Quality Data for 1701 "Pre-Drill" Water Well Samples from Susquehanna County, Pennsylvania

| Water Well ID | Sample Date | Sampling Port          | Topographic Location | Gas Extraction Area (Within 1 km of Active Gas Well) | Selenium (mg/L) | Silver (mg/L) | Sodium (mg/L) | Strontium (mg/L) | Sulfate (mg/L) | Sulfide (mg/L) | TDS (mg/L) | Thallium (mg/L) | TSS (mg/L) | Turbidity (NTU) | Vanadium (mg/L) |
|---------------|-------------|------------------------|----------------------|------------------------------------------------------|-----------------|---------------|---------------|------------------|----------------|----------------|------------|-----------------|------------|-----------------|-----------------|
| 584           | 6/28/2011   | Kitchen Sink           | Upland               |                                                      |                 |               |               |                  |                |                |            |                 |            |                 |                 |
| 585           | 6/28/2011   |                        | Valley               |                                                      |                 |               |               |                  |                |                |            |                 |            |                 |                 |
| 586           | 10/27/2009  | Pressure Tank          | Upland               |                                                      |                 |               |               | 0.099            |                | < 1            | 170        |                 | < 2        |                 |                 |
| 587           | 6/28/2011   | Kitchen Sink           | Valley               |                                                      |                 |               |               |                  |                |                |            |                 |            |                 |                 |
| 588           | 6/28/2011   | Basement Pressure Tank | Upland               |                                                      |                 |               |               |                  |                |                |            |                 |            |                 |                 |
| 589           | 6/29/2011   | Well Spigot            | Upland               |                                                      |                 |               |               |                  |                |                |            |                 |            |                 |                 |
| 590           | 6/29/2011   |                        | Valley               |                                                      |                 |               |               |                  |                |                |            |                 |            |                 |                 |
| 591           | 6/29/2011   |                        | Upland               |                                                      |                 |               |               |                  |                |                |            |                 |            |                 |                 |
| 592           | 6/29/2011   |                        | Valley               |                                                      |                 |               |               |                  |                |                |            |                 |            |                 |                 |
| 593           | 6/29/2011   |                        | Valley               |                                                      |                 |               |               |                  |                |                |            |                 |            |                 |                 |
| 594           | 6/29/2011   |                        | Upland               |                                                      |                 |               |               |                  |                |                |            |                 |            |                 |                 |
| 595           | 6/29/2011   | House Spigot           | Valley               |                                                      |                 |               |               |                  |                |                |            |                 |            |                 |                 |
| 596           | 6/29/2011   | Kitchen Sink (Dennis)  | Upland               |                                                      |                 |               |               |                  |                |                |            |                 |            |                 |                 |
| 597           | 6/30/2011   | Kitchen Sink           | Valley               |                                                      |                 |               |               |                  |                |                |            |                 |            |                 |                 |
| 598           | 10/27/2009  | Pressure Tank          | Valley               |                                                      |                 |               |               | 0.298            |                | < 1            | 88         |                 | < 2        |                 |                 |
| 599           | 6/30/2011   | Pressure Tank          | Valley               |                                                      |                 |               |               |                  |                |                |            |                 |            |                 |                 |
| 600           | 6/30/2011   |                        | Valley               |                                                      |                 |               |               |                  |                |                |            |                 |            |                 |                 |
| 601           | 6/30/2011   | Kitchen Sink           | Upland               |                                                      |                 |               |               |                  |                |                |            |                 |            |                 |                 |
| 602           | 6/30/2011   | Pressure Tank          | Valley               |                                                      |                 |               |               |                  |                |                |            |                 |            |                 |                 |
| 603           | 6/30/2011   |                        | Valley               |                                                      |                 |               |               |                  |                |                |            |                 |            |                 |                 |
| 604           | 6/30/2011   |                        | Valley               |                                                      |                 |               |               |                  |                |                |            |                 |            |                 |                 |
| 605           | 6/30/2011   |                        | Valley               |                                                      |                 |               |               |                  |                |                |            |                 |            |                 |                 |
| 606           | 6/30/2011   | Sink In Bays Of Garage | Upland               |                                                      |                 |               |               |                  |                |                |            |                 |            |                 |                 |
| 607           | 10/27/2009  | Pressure Tank          | Upland               |                                                      |                 |               |               | 0.386            |                | 3              | 120        |                 | 4          |                 |                 |
| 608           | 6/30/2011   | Basement Pressure Tank | Valley               |                                                      |                 |               |               |                  |                |                |            |                 |            |                 |                 |
| 609           | 6/30/2011   | Outside Spigot         | Upland               |                                                      |                 |               |               |                  |                |                |            |                 |            |                 |                 |
| 610           | 6/30/2011   |                        | Upland               |                                                      |                 |               |               |                  |                |                |            |                 |            |                 |                 |
| 611           | 6/30/2011   | Kitchen Sink           | Upland               |                                                      |                 |               |               |                  |                |                |            |                 |            |                 |                 |
| 612           | 6/30/2011   | Sink In Barn           | Valley               |                                                      |                 |               |               |                  |                |                |            |                 |            |                 |                 |
| 613           | 7/1/2011    | Kitchen Sink           | Upland               |                                                      |                 |               |               |                  |                |                |            |                 |            |                 |                 |



Table S.8. Groundwater Quality Data for 1701 "Pre-Drill" Water Well Samples from Susquehanna County, Pennsylvania

| Water Well ID | Sample Date | Sampling Port          | Topographic Location | Gas Extraction Area (Within 1 km of Active Gas Well) | Selenium (mg/L) | Silver (mg/L) | Sodium (mg/L) | Strontium (mg/L) | Sulfate (mg/L) | Sulfide (mg/L) | TDS (mg/L) | Thallium (mg/L) | TSS (mg/L) | Turbidity (NTU) | Vanadium (mg/L) |
|---------------|-------------|------------------------|----------------------|------------------------------------------------------|-----------------|---------------|---------------|------------------|----------------|----------------|------------|-----------------|------------|-----------------|-----------------|
| 614           | 7/1/2011    | Kitchen Sink           | Upland               |                                                      |                 |               |               |                  |                |                |            |                 |            |                 |                 |
| 615           | 7/1/2011    | Kitchen Sink           | Upland               |                                                      |                 |               |               |                  |                |                |            |                 |            |                 |                 |
| 616           | 7/1/2011    | Kitchen Sink           | Upland               |                                                      |                 |               |               |                  |                |                |            |                 |            |                 |                 |
| 617           | 7/1/2011    | Kitchen Sink           | Valley               |                                                      |                 |               |               |                  |                |                |            |                 |            |                 |                 |
| 618           | 7/1/2011    | Outside Spigot         | Upland               |                                                      |                 |               |               |                  |                |                |            |                 |            |                 |                 |
| 619           | 7/1/2011    |                        | Valley               |                                                      |                 |               |               |                  |                |                |            |                 |            |                 |                 |
| 620           | 7/1/2011    | Outside Spigot         | Valley               |                                                      |                 |               |               |                  |                |                |            |                 |            |                 |                 |
| 621           | 7/1/2011    | Wellhead Spigot        | Valley               |                                                      |                 |               |               |                  |                |                |            |                 |            |                 |                 |
| 622           | 7/5/2011    | Bathroom Sink          | Valley               |                                                      |                 |               |               |                  |                |                |            |                 |            |                 |                 |
| 623           | 7/5/2011    | Kitchen Sink           | Upland               |                                                      |                 |               |               |                  |                |                |            |                 |            |                 |                 |
| 624           | 7/5/2011    | Basement Pressure Tank | Upland               |                                                      |                 |               |               |                  |                |                |            |                 |            |                 |                 |
| 625           | 7/5/2011    |                        | Valley               |                                                      |                 |               |               |                  |                |                |            |                 |            |                 |                 |
| 626           | 7/5/2011    | Kitchen Sink           | Valley               |                                                      |                 |               |               |                  |                |                |            |                 |            |                 |                 |
| 627           | 10/27/2009  | Pressure Tank          | Valley               |                                                      |                 |               |               | 0.501            |                | 16             | 205        |                 | < 2        |                 |                 |
| 628           | 7/5/2011    | Kitchen Sink           | Upland               |                                                      |                 |               |               |                  |                |                |            |                 |            |                 |                 |
| 629           | 7/5/2011    | Outside Spigot         | Valley               |                                                      |                 |               |               |                  |                |                |            |                 |            |                 |                 |
| 630           | 7/5/2011    | Kitchen Sink           | Upland               |                                                      |                 |               |               |                  |                |                |            |                 |            |                 |                 |
| 631           | 7/5/2011    | Kitchen Sink           | Valley               |                                                      |                 |               |               |                  |                |                |            |                 |            |                 |                 |
| 632           | 7/5/2011    | Outside Spigot         | Valley               |                                                      |                 |               |               |                  |                |                |            |                 |            |                 |                 |
| 633           | 7/5/2011    | Kitchen Sink           | Valley               |                                                      |                 |               |               |                  |                |                |            |                 |            |                 |                 |
| 634           | 7/5/2011    | Kitchen Sink           | Valley               |                                                      |                 |               |               |                  |                |                |            |                 |            |                 |                 |
| 635           | 7/5/2011    | Kitchen Sink Main Camp | Valley               |                                                      |                 |               |               |                  |                |                |            |                 |            |                 |                 |
| 636           | 7/5/2011    | Pressure Tank          | Valley               |                                                      |                 |               |               |                  |                |                |            |                 |            |                 |                 |
| 637           | 7/5/2011    | Kitchen Sink           | Upland               |                                                      |                 |               |               |                  |                |                |            |                 |            |                 |                 |
| 638           | 7/5/2011    | Kitchen Faucet         | Valley               |                                                      |                 |               |               |                  |                |                |            |                 |            |                 |                 |

Table S.8. Groundwater Quality Data for 1701 "Pre-Drill" Water Well Samples from Susquehanna County, Pennsylvania

| Water Well ID | Sample Date | Sampling Port             | Topographic Location | Gas Extraction Area (Within 1 km of Active Gas Well) | Selenium (mg/L) | Silver (mg/L) | Sodium (mg/L) | Strontium (mg/L) | Sulfate (mg/L) | Sulfide (mg/L) | TDS (mg/L) | Thallium (mg/L) | TSS (mg/L) | Turbidity (NTU) | Vanadium (mg/L) |
|---------------|-------------|---------------------------|----------------------|------------------------------------------------------|-----------------|---------------|---------------|------------------|----------------|----------------|------------|-----------------|------------|-----------------|-----------------|
| 639           | 7/5/2011    | Kitchen Sink              | Valley               |                                                      |                 |               |               |                  |                |                |            |                 |            |                 |                 |
| 640           | 7/5/2011    | Kitchen Sink              | Upland               |                                                      |                 |               |               |                  |                |                |            |                 |            |                 |                 |
| 641           | 7/5/2011    | Kitchen Sink              | Upland               |                                                      |                 |               |               |                  |                |                |            |                 |            |                 |                 |
| 642           | 7/6/2011    | Kitchen Sink              | Upland               |                                                      |                 |               |               |                  |                |                |            |                 |            |                 |                 |
| 643           | 7/6/2011    | Kitchen Sink              | Valley               |                                                      |                 |               |               |                  |                |                |            |                 |            |                 |                 |
| 644           | 7/6/2011    | Kitchen Sink              | Upland               |                                                      |                 |               |               |                  |                |                |            |                 |            |                 |                 |
| 645           | 7/6/2011    |                           | Upland               |                                                      |                 |               |               |                  |                |                |            |                 |            |                 |                 |
| 646           | 7/6/2011    | Farm Sink                 | Valley               |                                                      |                 |               |               |                  |                |                |            |                 |            |                 |                 |
| 647           | 7/6/2011    |                           | Upland               |                                                      |                 |               |               |                  |                |                |            |                 |            |                 |                 |
| 648           | 7/6/2011    | Kitchen Sink              | Valley               |                                                      |                 |               |               |                  |                |                |            |                 |            |                 |                 |
| 649           | 7/6/2011    |                           | Valley               |                                                      |                 |               |               |                  |                |                |            |                 |            |                 |                 |
| 650           | 7/6/2011    | Kitchen Sink              | Valley               |                                                      |                 |               |               |                  |                |                |            |                 |            |                 |                 |
| 651           | 7/6/2011    | Kitchen Sink              | Valley               |                                                      |                 |               |               |                  |                |                |            |                 |            |                 |                 |
| 652           | 7/6/2011    | Basement Pressure Tank    | Valley               |                                                      |                 |               |               |                  |                |                |            |                 |            |                 |                 |
| 653           | 7/6/2011    | House Well                | Upland               |                                                      |                 |               |               |                  |                |                |            |                 |            |                 |                 |
| 654           | 7/6/2011    | Outside Spigot            | Valley               |                                                      |                 |               |               |                  |                |                |            |                 |            |                 |                 |
| 655           | 7/7/2011    | Pressure Tank In Basement | Upland               |                                                      |                 |               |               |                  |                |                |            |                 |            |                 |                 |
| 656           | 7/7/2011    | Kitchen Sink              | Upland               |                                                      |                 |               |               |                  |                |                |            |                 |            |                 |                 |
| 657           | 7/7/2011    | Outside Faucet            | Upland               |                                                      |                 |               |               |                  |                |                |            |                 |            |                 |                 |
| 658           | 7/7/2011    | Kitchen Sink              | Valley               |                                                      |                 |               |               |                  |                |                |            |                 |            |                 |                 |
| 659           | 7/7/2011    | Kitchen Sink              | Upland               |                                                      |                 |               |               |                  |                |                |            |                 |            |                 |                 |
| 660           | 7/7/2011    | Kitchen Sink              | Upland               |                                                      |                 |               |               |                  |                |                |            |                 |            |                 |                 |
| 661           | 7/7/2011    | Outside Faucet            | Valley               |                                                      |                 |               |               |                  |                |                |            |                 |            |                 |                 |
| 662           | 7/7/2011    | Garage Spigot             | Valley               |                                                      |                 |               |               |                  |                |                |            |                 |            |                 |                 |
| 663           | 7/7/2011    | Kitchen Sink              | Valley               |                                                      |                 |               |               |                  |                |                |            |                 |            |                 |                 |
| 664           | 7/7/2011    | Pressure Tank             | Upland               |                                                      |                 |               |               |                  |                |                |            |                 |            |                 |                 |
| 665           | 7/7/2011    | Kitchen Sink              | Upland               |                                                      |                 |               |               |                  |                |                |            |                 |            |                 |                 |

Table S.8. Groundwater Quality Data for 1701 "Pre-Drill" Water Well Samples from Susquehanna County, Pennsylvania

| Water Well ID | Sample Date | Sampling Port              | Topographic Location | Gas Extraction Area (Within 1 km of Active Gas Well) | Selenium (mg/L) | Silver (mg/L) | Sodium (mg/L) | Strontium (mg/L) | Sulfate (mg/L) | Sulfide (mg/L) | TDS (mg/L) | Thallium (mg/L) | TSS (mg/L) | Turbidity (NTU) | Vanadium (mg/L) |
|---------------|-------------|----------------------------|----------------------|------------------------------------------------------|-----------------|---------------|---------------|------------------|----------------|----------------|------------|-----------------|------------|-----------------|-----------------|
| 666           | 7/7/2011    | Kitchen Sink               | Valley               |                                                      |                 |               |               |                  |                |                |            |                 |            |                 |                 |
| 667           | 7/7/2011    | Kitchen Sink               | Upland               |                                                      |                 |               |               |                  |                |                |            |                 |            |                 |                 |
| 668           | 7/7/2011    | Kitchen Sink               | Upland               |                                                      |                 |               |               |                  |                |                |            |                 |            |                 |                 |
| 669           | 7/7/2011    | Bunk House Sink            | Upland               |                                                      |                 |               |               |                  |                |                |            |                 |            |                 |                 |
| 670           | 7/7/2011    | Spigot At Well Head        | Valley               |                                                      |                 |               |               |                  |                |                |            |                 |            |                 |                 |
| 671           | 7/8/2011    | Kitchen Sink               | Valley               |                                                      |                 |               |               |                  |                |                |            |                 |            |                 |                 |
| 672           | 7/8/2011    | Kitchen Faucet             | Upland               |                                                      |                 |               |               |                  |                |                |            |                 |            |                 |                 |
| 673           | 7/8/2011    | Pressure Tank              | Valley               |                                                      |                 |               |               |                  |                |                |            |                 |            |                 |                 |
| 674           | 7/8/2011    | Kitchen Faucet             | Upland               |                                                      |                 |               |               |                  |                |                |            |                 |            |                 |                 |
| 675           | 7/8/2011    | Kitchen Faucet             | Upland               |                                                      |                 |               |               |                  |                |                |            |                 |            |                 |                 |
| 676           | 7/8/2011    | Kitchen Sink               | Upland               |                                                      |                 |               |               |                  |                |                |            |                 |            |                 |                 |
| 677           | 7/8/2011    | Kitchen Sink               | Upland               |                                                      |                 |               |               |                  |                |                |            |                 |            |                 |                 |
| 678           | 7/8/2011    | Kitchen Sink               | Valley               |                                                      |                 |               |               |                  |                |                |            |                 |            |                 |                 |
| 679           | 7/8/2011    | Spigot In Cooling Barn     | Upland               |                                                      |                 |               |               |                  |                |                |            |                 |            |                 |                 |
| 680           | 7/8/2011    | Kitchen Sink               | Upland               |                                                      |                 |               |               |                  |                |                |            |                 |            |                 |                 |
| 681           | 7/8/2011    | Shop Sink                  | Upland               |                                                      |                 |               |               |                  |                |                |            |                 |            |                 |                 |
| 682           | 7/8/2011    | Kitchen Sink               | Upland               |                                                      |                 |               |               |                  |                |                |            |                 |            |                 |                 |
| 683           | 7/9/2011    | Kitchen Sink               | Upland               |                                                      |                 |               |               |                  |                |                |            |                 |            |                 |                 |
| 684           | 7/11/2011   | Spigot On Front Of House   | Valley               |                                                      |                 |               |               |                  |                |                |            |                 |            |                 |                 |
| 685           | 7/11/2011   | Spigot Near Water Fountain | Valley               |                                                      |                 |               |               |                  |                |                |            |                 |            |                 |                 |
| 686           | 7/11/2011   | Outside Spigot             | Upland               |                                                      |                 |               |               |                  |                |                |            |                 |            |                 |                 |
| 687           | 7/11/2011   | Kitchen Sink               | Valley               |                                                      |                 |               |               |                  |                |                |            |                 |            |                 |                 |
| 688           | 7/11/2011   | Kitchen Sink               | Valley               |                                                      |                 |               |               |                  |                |                |            |                 |            |                 |                 |
| 689           | 7/11/2011   | Kitchen Sink               | Valley               |                                                      |                 |               |               |                  |                |                |            |                 |            |                 |                 |

Table S.8. Groundwater Quality Data for 1701 "Pre-Drill" Water Well Samples from Susquehanna County, Pennsylvania

| Water Well ID | Sample Date | Sampling Port            | Topographic Location | Gas Extraction Area (Within 1 km of Active Gas Well) | Selenium (mg/L) | Silver (mg/L) | Sodium (mg/L) | Strontium (mg/L) | Sulfate (mg/L) | Sulfide (mg/L) | TDS (mg/L) | Thallium (mg/L) | TSS (mg/L) | Turbidity (NTU) | Vanadium (mg/L) |
|---------------|-------------|--------------------------|----------------------|------------------------------------------------------|-----------------|---------------|---------------|------------------|----------------|----------------|------------|-----------------|------------|-----------------|-----------------|
| 690           | 11/5/2009   | Pressure Tank            | Upland               | Yes                                                  |                 |               |               | 0.369            |                | < 1            | 148        |                 | < 2        |                 |                 |
| 691           | 7/11/2011   | Kitchen Sink             | Upland               |                                                      |                 |               |               |                  |                |                |            |                 |            |                 |                 |
| 692           | 7/11/2011   | Kitchen Sink             | Upland               |                                                      |                 |               |               |                  |                |                |            |                 |            |                 |                 |
| 693           | 7/11/2011   | Kitchen Sink             | Upland               |                                                      |                 |               |               |                  |                |                |            |                 |            |                 |                 |
| 694           | 7/11/2011   | Hand Dug Well            | Upland               |                                                      |                 |               |               |                  |                |                |            |                 |            |                 |                 |
| 695           | 7/11/2011   | Kitchen Sink             | Valley               |                                                      |                 |               |               |                  |                |                |            |                 |            |                 |                 |
| 696           | 7/12/2011   | Bathroom Sink Downstairs | Valley               |                                                      |                 |               |               |                  |                |                |            |                 |            |                 |                 |
| 697           | 7/12/2011   | Kitchen Sink             | Upland               |                                                      |                 |               |               |                  |                |                |            |                 |            |                 |                 |
| 698           | 7/12/2011   | Kitchen Faucet           | Valley               |                                                      |                 |               |               |                  |                |                |            |                 |            |                 |                 |
| 699           | 7/12/2011   | Kitchen Sink             | Valley               |                                                      |                 |               |               |                  |                |                |            |                 |            |                 |                 |
| 700           | 7/12/2011   | Kitchen Sink             | Valley               |                                                      |                 |               |               |                  |                |                |            |                 |            |                 |                 |
| 701           | 7/12/2011   | Pressure Tank            | Upland               |                                                      |                 |               |               |                  |                |                |            |                 |            |                 |                 |
| 702           | 7/12/2011   | Kitchen Sink             | Upland               |                                                      |                 |               |               |                  |                |                |            |                 |            |                 |                 |
| 703           | 7/12/2011   | Spigot Before Filter     | Valley               |                                                      |                 |               |               |                  |                |                |            |                 |            |                 |                 |
| 704           | 7/12/2011   | Kitchen Sink             | Valley               |                                                      |                 |               |               |                  |                |                |            |                 |            |                 |                 |
| 705           | 7/12/2011   |                          | Valley               |                                                      |                 |               |               |                  |                |                |            |                 |            |                 |                 |
| 706           | 7/12/2011   | Pressure Tank            | Upland               |                                                      |                 |               |               |                  |                |                |            |                 |            |                 |                 |
| 707           | 7/12/2011   | Inside Faucet            | Upland               |                                                      |                 |               |               |                  |                |                |            |                 |            |                 |                 |
| 708           | 7/12/2011   | Kitchen Sink             | Upland               |                                                      |                 |               |               |                  |                |                |            |                 |            |                 |                 |
| 709           | 7/12/2011   | Spigot                   | Upland               |                                                      |                 |               |               |                  |                |                |            |                 |            |                 |                 |
| 710           | 7/12/2011   | Spigot                   | Upland               |                                                      |                 |               |               |                  |                |                |            |                 |            |                 |                 |
| 711           | 7/12/2011   | Kitchen Sink             | Valley               |                                                      |                 |               |               |                  |                |                |            |                 |            |                 |                 |
| 712           | 7/12/2011   | Kitchen Faucet           | Upland               |                                                      |                 |               |               |                  |                |                |            |                 |            |                 |                 |
| 713           | 7/12/2011   | Kitchen Faucet           | Valley               |                                                      |                 |               |               |                  |                |                |            |                 |            |                 |                 |
| 714           | 7/13/2011   | Kitchen Sink             | Valley               |                                                      |                 |               |               |                  |                |                |            |                 |            |                 |                 |
| 715           | 7/13/2011   | Kitchen Sink             | Valley               |                                                      |                 |               |               |                  |                |                |            |                 |            |                 |                 |

Table S.8. Groundwater Quality Data for 1701 "Pre-Drill" Water Well Samples from Susquehanna County, Pennsylvania

| Water Well ID | Sample Date | Sampling Port                  | Topographic Location | Gas Extraction Area (Within 1 km of Active Gas Well) | Selenium (mg/L) | Silver (mg/L) | Sodium (mg/L) | Strontium (mg/L) | Sulfate (mg/L) | Sulfide (mg/L) | TDS (mg/L) | Thallium (mg/L) | TSS (mg/L) | Turbidity (NTU) | Vanadium (mg/L) |
|---------------|-------------|--------------------------------|----------------------|------------------------------------------------------|-----------------|---------------|---------------|------------------|----------------|----------------|------------|-----------------|------------|-----------------|-----------------|
| 716           | 7/13/2011   | Kitchen Sink                   | Upland               |                                                      |                 |               |               |                  |                |                |            |                 |            |                 |                 |
| 717           | 7/13/2011   | Spigot                         | Valley               |                                                      |                 |               |               |                  |                |                |            |                 |            |                 |                 |
| 718           | 7/13/2011   | Spigot On Well                 | Valley               |                                                      |                 |               |               |                  |                |                |            |                 |            |                 |                 |
| 719           | 7/13/2011   | Barn Spigot                    | Valley               |                                                      |                 |               |               |                  |                |                |            |                 |            |                 |                 |
| 720           | 7/13/2011   | Kitchen Sink                   | Valley               |                                                      |                 |               |               |                  |                |                |            |                 |            |                 |                 |
| 721           | 7/13/2011   | Garage Spigot                  | Upland               |                                                      |                 |               |               |                  |                |                |            |                 |            |                 |                 |
| 722           | 7/13/2011   | Kitchen Sink                   | Valley               |                                                      |                 |               |               |                  |                |                |            |                 |            |                 |                 |
| 723           | 7/13/2011   | Kitchen Sink                   | Valley               |                                                      |                 |               |               |                  |                |                |            |                 |            |                 |                 |
| 724           | 7/8/2011    |                                | Upland               |                                                      |                 |               |               |                  |                |                |            |                 |            |                 |                 |
| 725           | 7/8/2011    | Kitchen Sink                   | Upland               |                                                      |                 |               |               |                  |                |                |            |                 |            |                 |                 |
| 726           | 4/13/2011   | Milkhouse Faucet Barn Well     | Valley               |                                                      | < .002          | < .001        | 75            | 0.42             | < 5            | 5              | 193        |                 | < 2        | < 1             |                 |
| 727           | 4/13/2011   | Tenant'S Pressure Tank         | Upland               |                                                      | < .002          | < .001        | 2.6           | 0.032            | 16             | < 1            | 127        |                 | < 2        | < 1             |                 |
| 728           | 4/13/2011   | Outside Spigot On Garage       | Upland               |                                                      | < .002          | < .001        | 23            | 0.88             | 14             | < 1            | 120        |                 | 27         | 21              |                 |
| 729           | 4/26/2011   | Pressure Tank                  | Valley               |                                                      | < .002          | < .001        | 16            | 0.75             | 24             | < 1            | 260        |                 | 13         | 3               |                 |
| 730           | 6/17/2011   | Spigot On Front Of House       | Upland               |                                                      |                 |               |               |                  |                |                |            |                 |            |                 |                 |
| 731           | 6/17/2011   | Kitchen Sink                   | Valley               |                                                      |                 |               |               |                  |                |                |            |                 |            |                 |                 |
| 732           | 6/17/2011   | Spigot Inside Of Shed On Right | Upland               |                                                      |                 |               |               |                  |                |                |            |                 |            |                 |                 |
| 733           | 6/17/2011   | Kitchen Sink                   | Valley               |                                                      |                 |               |               |                  |                |                |            |                 |            |                 |                 |
| 734           | 6/17/2011   | Pressure Tank                  | Valley               |                                                      |                 |               |               |                  |                |                |            |                 |            |                 |                 |
| 735           | 6/20/2011   | Kitchen Sink                   | Upland               |                                                      |                 |               |               |                  |                |                |            |                 |            |                 |                 |
| 736           | 6/20/2011   | Pressure Tank                  | Valley               |                                                      |                 |               |               |                  |                |                |            |                 |            |                 |                 |
| 737           | 6/20/2011   | Kitchen Sink                   | Upland               |                                                      |                 |               |               |                  |                |                |            |                 |            |                 |                 |
| 738           | 6/20/2011   | Kitchen Sink                   | Valley               |                                                      |                 |               |               |                  |                |                |            |                 |            |                 |                 |
| 739           | 6/20/2011   | Kitchen Sink                   | Valley               |                                                      |                 |               |               |                  |                |                |            |                 |            |                 |                 |

Table S.8. Groundwater Quality Data for 1701 "Pre-Drill" Water Well Samples from Susquehanna County, Pennsylvania

| Water Well ID | Sample Date | Sampling Port                 | Topographic Location | Gas Extraction Area (Within 1 km of Active Gas Well) | Selenium (mg/L) | Silver (mg/L) | Sodium (mg/L) | Strontium (mg/L) | Sulfate (mg/L) | Sulfide (mg/L) | TDS (mg/L) | Thallium (mg/L) | TSS (mg/L) | Turbidity (NTU) | Vanadium (mg/L) |
|---------------|-------------|-------------------------------|----------------------|------------------------------------------------------|-----------------|---------------|---------------|------------------|----------------|----------------|------------|-----------------|------------|-----------------|-----------------|
| 740           | 6/20/2011   | Kitchen Sink                  | Valley               |                                                      |                 |               |               |                  |                |                |            |                 |            |                 |                 |
| 741           | 6/21/2011   | Kitchen Sink                  | Upland               |                                                      |                 |               |               |                  |                |                |            |                 |            |                 |                 |
| 742           | 6/21/2011   | Kitchen Sink                  | Valley               |                                                      |                 |               |               |                  |                |                |            |                 |            |                 |                 |
| 743           | 6/21/2011   | Kitchen Sink                  | Valley               |                                                      |                 |               |               |                  |                |                |            |                 |            |                 |                 |
| 744           | 6/21/2011   | Kitchen Sink                  | Valley               |                                                      |                 |               |               |                  |                |                |            |                 |            |                 |                 |
| 745           | 6/21/2011   |                               | Valley               |                                                      |                 |               |               |                  |                |                |            |                 |            |                 |                 |
| 746           | 6/21/2011   | Outside Spigot                | Valley               |                                                      |                 |               |               |                  |                |                |            |                 |            |                 |                 |
| 747           | 6/21/2011   | Kitchen Sink                  | Valley               |                                                      |                 |               |               |                  |                |                |            |                 |            |                 |                 |
| 748           | 6/21/2011   | Wellhead Spigot               | Valley               |                                                      |                 |               |               |                  |                |                |            |                 |            |                 |                 |
| 749           | 6/21/2011   | Kitchen Sink                  | Upland               |                                                      |                 |               |               |                  |                |                |            |                 |            |                 |                 |
| 750           | 6/21/2011   |                               | Upland               |                                                      |                 |               |               |                  |                |                |            |                 |            |                 |                 |
| 751           | 6/29/2011   | Kitchen Sink                  | Upland               |                                                      |                 |               |               |                  |                |                |            |                 |            |                 |                 |
| 752           | 6/29/2011   | Barn Spigot                   | Valley               |                                                      |                 |               |               |                  |                |                |            |                 |            |                 |                 |
| 753           | 7/8/2011    | Well 2 On South Side Of House | Upland               |                                                      |                 |               |               |                  |                |                |            |                 |            |                 |                 |
| 754           | 7/8/2011    | Kitchen Sink                  | Upland               |                                                      |                 |               |               |                  |                |                |            |                 |            |                 |                 |
| 755           | 7/8/2011    | Kitchen Sink                  | Valley               |                                                      |                 |               |               |                  |                |                |            |                 |            |                 |                 |
| 756           | 7/9/2011    | Kitchen Sink                  | Valley               |                                                      |                 |               |               |                  |                |                |            |                 |            |                 |                 |
| 757           | 7/9/2011    | Spring                        | Upland               |                                                      |                 |               |               |                  |                |                |            |                 |            |                 |                 |
| 758           | 7/11/2011   | Kitchen Sink                  | Valley               |                                                      |                 |               |               |                  |                |                |            |                 |            |                 |                 |
| 759           | 7/11/2011   | Kitchen Sink                  | Valley               |                                                      |                 |               |               |                  |                |                |            |                 |            |                 |                 |
| 760           | 7/11/2011   | Kitchen Sink                  | Valley               |                                                      |                 |               |               |                  |                |                |            |                 |            |                 |                 |
| 761           | 11/5/2009   | Outside Faucet                | Valley               | Yes                                                  |                 |               |               | 0.608            |                | 3              | 142        |                 | 3.2        |                 |                 |
| 762           | 7/12/2011   | Kitchen Sink                  | Valley               |                                                      |                 |               |               |                  |                |                |            |                 |            |                 |                 |
| 763           | 7/12/2011   | Kitchen Sink                  | Valley               |                                                      |                 |               |               |                  |                |                |            |                 |            |                 |                 |
| 764           | 7/14/2011   | Kitchen Sink                  | Upland               |                                                      |                 |               |               |                  |                |                |            |                 |            |                 |                 |
| 765           | 7/14/2011   | Kitchen Sink                  | Upland               |                                                      |                 |               |               |                  |                |                |            |                 |            |                 |                 |
| 766           | 7/14/2011   | Kitchen Sink                  | Valley               |                                                      |                 |               |               |                  |                |                |            |                 |            |                 |                 |

**Table S.8. Groundwater Quality Data for 1701 "Pre-Drill" Water Well Samples from Susquehanna County, Pennsylvania**

| Water Well ID | Sample Date | Sampling Port           | Topographic Location | Gas Extraction Area (Within 1 km of Active Gas Well) | Selenium (mg/L) | Silver (mg/L) | Sodium (mg/L) | Strontium (mg/L) | Sulfate (mg/L) | Sulfide (mg/L) | TDS (mg/L) | Thallium (mg/L) | TSS (mg/L) | Turbidity (NTU) | Vanadium (mg/L) |
|---------------|-------------|-------------------------|----------------------|------------------------------------------------------|-----------------|---------------|---------------|------------------|----------------|----------------|------------|-----------------|------------|-----------------|-----------------|
| 767           | 7/14/2011   | Spigot On Side Of House | Valley               |                                                      |                 |               |               |                  |                |                |            |                 |            |                 |                 |
| 768           | 7/14/2011   | Kitchen Sink            | Valley               |                                                      |                 |               |               |                  |                |                |            |                 |            |                 |                 |
| 769           | 7/14/2011   | Kitchen Sink            | Valley               |                                                      |                 |               |               |                  |                |                |            |                 |            |                 |                 |
| 770           | 7/14/2011   | Kitchen Sink            | Valley               |                                                      |                 |               |               |                  |                |                |            |                 |            |                 |                 |
| 771           | 7/14/2011   | Kitchen Sink            | Upland               |                                                      |                 |               |               |                  |                |                |            |                 |            |                 |                 |
| 772           | 7/14/2011   | Kitchen Sink            | Valley               |                                                      |                 |               |               |                  |                |                |            |                 |            |                 |                 |
| 773           | 7/14/2011   | Spigot                  | Valley               |                                                      |                 |               |               |                  |                |                |            |                 |            |                 |                 |
| 774           | 7/15/2011   | Kitchen Sink            | Valley               |                                                      |                 |               |               |                  |                |                |            |                 |            |                 |                 |
| 775           | 7/15/2011   | Kitchen Sink            | Valley               |                                                      |                 |               |               |                  |                |                |            |                 |            |                 |                 |
| 776           | 7/15/2011   | Kitchen Sink            | Upland               |                                                      |                 |               |               |                  |                |                |            |                 |            |                 |                 |
| 777           | 7/15/2011   | Kitchen Sink            | Upland               |                                                      |                 |               |               |                  |                |                |            |                 |            |                 |                 |
| 778           | 7/15/2011   | Outside Faucet          | Valley               |                                                      |                 |               |               |                  |                |                |            |                 |            |                 |                 |
| 779           | 7/15/2011   | Kitchen Sink            | Valley               |                                                      |                 |               |               |                  |                |                |            |                 |            |                 |                 |
| 780           | 7/15/2011   | Spigot East Of House    | Valley               |                                                      |                 |               |               |                  |                |                |            |                 |            |                 |                 |
| 781           | 7/15/2011   | Outside Faucet          | Upland               |                                                      |                 |               |               |                  |                |                |            |                 |            |                 |                 |
| 782           | 7/15/2011   | Outside Faucet          | Upland               |                                                      |                 |               |               |                  |                |                |            |                 |            |                 |                 |
| 783           | 7/15/2011   | Kitchen Sink            | Upland               |                                                      |                 |               |               |                  |                |                |            |                 |            |                 |                 |
| 784           | 7/15/2011   | Kitchen Sink            | Valley               |                                                      |                 |               |               |                  |                |                |            |                 |            |                 |                 |
| 785           | 7/15/2011   | Kitchen Sink            | Valley               |                                                      |                 |               |               |                  |                |                |            |                 |            |                 |                 |
| 786           | 7/15/2011   | Kitchen Sink            | Valley               |                                                      |                 |               |               |                  |                |                |            |                 |            |                 |                 |
| 787           | 7/15/2011   | Kitchen Sink            | Valley               |                                                      |                 |               |               |                  |                |                |            |                 |            |                 |                 |
| 788           | 7/15/2011   | Kitchen Sink            | Valley               |                                                      |                 |               |               |                  |                |                |            |                 |            |                 |                 |
| 789           | 7/15/2011   | Kitchen Sink            | Valley               |                                                      |                 |               |               |                  |                |                |            |                 |            |                 |                 |
| 790           | 7/15/2011   | Kitchen Sink            | Valley               |                                                      |                 |               |               |                  |                |                |            |                 |            |                 |                 |
| 791           | 7/15/2011   | Kitchen Sink            | Upland               |                                                      |                 |               |               |                  |                |                |            |                 |            |                 |                 |

Table S.8. Groundwater Quality Data for 1701 "Pre-Drill" Water Well Samples from Susquehanna County, Pennsylvania

| Water Well ID | Sample Date | Sampling Port                    | Topographic Location | Gas Extraction Area (Within 1 km of Active Gas Well) | Selenium (mg/L) | Silver (mg/L) | Sodium (mg/L) | Strontium (mg/L) | Sulfate (mg/L) | Sulfide (mg/L) | TDS (mg/L) | Thallium (mg/L) | TSS (mg/L) | Turbidity (NTU) | Vanadium (mg/L) |
|---------------|-------------|----------------------------------|----------------------|------------------------------------------------------|-----------------|---------------|---------------|------------------|----------------|----------------|------------|-----------------|------------|-----------------|-----------------|
| 792           | 7/15/2011   | Spigot On Rear Of House          | Valley               |                                                      |                 |               |               |                  |                |                |            |                 |            |                 |                 |
| 793           | 7/15/2011   | Kitchen Sink                     | Valley               |                                                      |                 |               |               |                  |                |                |            |                 |            |                 |                 |
| 794           | 7/15/2011   | Kitchen Sink                     | Valley               |                                                      |                 |               |               |                  |                |                |            |                 |            |                 |                 |
| 795           | 7/16/2011   | Kitchen Faucet                   | Upland               |                                                      |                 |               |               |                  |                |                |            |                 |            |                 |                 |
| 796           | 7/16/2011   | Kitchen Faucet                   | Valley               |                                                      |                 |               |               |                  |                |                |            |                 |            |                 |                 |
| 797           | 7/16/2011   | Kitchen Faucet                   | Upland               |                                                      |                 |               |               |                  |                |                |            |                 |            |                 |                 |
| 798           | 7/16/2011   | Kitchen Faucet                   | Upland               |                                                      |                 |               |               |                  |                |                |            |                 |            |                 |                 |
| 799           | 7/16/2011   | Kitchen Sink                     | Upland               |                                                      |                 |               |               |                  |                |                |            |                 |            |                 |                 |
| 800           | 7/17/2011   | Outside Spigot In Back Of House  | Valley               |                                                      |                 |               |               |                  |                |                |            |                 |            |                 |                 |
| 801           | 7/17/2011   | Outside Spigot On Front Of House | Valley               |                                                      |                 |               |               |                  |                |                |            |                 |            |                 |                 |
| 802           | 7/17/2011   | Well                             | Upland               |                                                      |                 |               |               |                  |                |                |            |                 |            |                 |                 |
| 803           | 7/17/2011   | Blue Well 40Ft From Road         | Upland               |                                                      |                 |               |               |                  |                |                |            |                 |            |                 |                 |
| 804           | 7/17/2011   | Kitchen Faucet                   | Upland               |                                                      |                 |               |               |                  |                |                |            |                 |            |                 |                 |
| 805           | 7/17/2011   | Spigot From Garage               | Valley               |                                                      |                 |               |               |                  |                |                |            |                 |            |                 |                 |
| 806           | 7/18/2011   | Outside Spigot                   | Upland               |                                                      |                 |               |               |                  |                |                |            |                 |            |                 |                 |
| 807           | 7/18/2011   | Kitchen Sink                     | Upland               |                                                      |                 |               |               |                  |                |                |            |                 |            |                 |                 |
| 808           | 7/18/2011   | Outside Spigot                   | Upland               |                                                      |                 |               |               |                  |                |                |            |                 |            |                 |                 |
| 809           | 7/18/2011   | Kitchen Sink                     | Valley               |                                                      |                 |               |               |                  |                |                |            |                 |            |                 |                 |
| 810           | 7/18/2011   | Kitchen Sink                     | Upland               |                                                      |                 |               |               |                  |                |                |            |                 |            |                 |                 |
| 811           | 7/18/2011   | Kitchen Sink                     | Valley               |                                                      |                 |               |               |                  |                |                |            |                 |            |                 |                 |
| 812           | 7/18/2011   | Kitchen Sink                     | Valley               |                                                      |                 |               |               |                  |                |                |            |                 |            |                 |                 |
| 813           | 7/19/2011   |                                  | Upland               |                                                      |                 |               |               |                  |                |                |            |                 |            |                 |                 |
| 814           | 7/19/2011   | Garage Sink                      | Valley               |                                                      |                 |               |               |                  |                |                |            |                 |            |                 |                 |
| 815           | 7/19/2011   | Kitchen Sink                     | Valley               |                                                      |                 |               |               |                  |                |                |            |                 |            |                 |                 |



Table S.8. Groundwater Quality Data for 1701 "Pre-Drill" Water Well Samples from Susquehanna County, Pennsylvania

| Water Well ID | Sample Date | Sampling Port            | Topographic Location | Gas Extraction Area (Within 1 km of Active Gas Well) | Selenium (mg/L) | Silver (mg/L) | Sodium (mg/L) | Strontium (mg/L) | Sulfate (mg/L) | Sulfide (mg/L) | TDS (mg/L) | Thallium (mg/L) | TSS (mg/L) | Turbidity (NTU) | Vanadium (mg/L) |
|---------------|-------------|--------------------------|----------------------|------------------------------------------------------|-----------------|---------------|---------------|------------------|----------------|----------------|------------|-----------------|------------|-----------------|-----------------|
| 816           | 7/19/2011   | Barn 2 Pressure Tank     | Valley               |                                                      |                 |               |               |                  |                |                |            |                 |            |                 |                 |
| 817           | 7/19/2011   | Spigot On Side Of Barn   | Upland               |                                                      |                 |               |               |                  |                |                |            |                 |            |                 |                 |
| 818           | 7/19/2011   | Well Head                | Valley               |                                                      |                 |               |               |                  |                |                |            |                 |            |                 |                 |
| 819           | 11/23/2009  |                          | Upland               | Yes                                                  |                 |               |               | 0.225            |                | < 1            | 108        |                 | < 2        | < 1             |                 |
| 820           | 7/19/2011   | Kitchen Sink             | Valley               |                                                      |                 |               |               |                  |                |                |            |                 |            |                 |                 |
| 821           | 7/19/2011   | Kitchen Sink             | Valley               |                                                      |                 |               |               |                  |                |                |            |                 |            |                 |                 |
| 822           | 7/19/2011   | Kitchen Sink             | Valley               |                                                      |                 |               |               |                  |                |                |            |                 |            |                 |                 |
| 823           | 7/19/2011   | Kitchen Sink             | Valley               |                                                      |                 |               |               |                  |                |                |            |                 |            |                 |                 |
| 824           | 7/20/2011   | Outside Faucet           | Upland               |                                                      |                 |               |               |                  |                |                |            |                 |            |                 |                 |
| 825           | 7/20/2011   | Inside Spigot            | Upland               |                                                      |                 |               |               |                  |                |                |            |                 |            |                 |                 |
| 826           | 7/20/2011   | Kitchen Sink             | Upland               |                                                      |                 |               |               |                  |                |                |            |                 |            |                 |                 |
| 827           | 7/20/2011   | Kitchen Sink             | Valley               |                                                      |                 |               |               |                  |                |                |            |                 |            |                 |                 |
| 828           | 7/20/2011   | Kitchen Sink             | Upland               |                                                      |                 |               |               |                  |                |                |            |                 |            |                 |                 |
| 829           | 7/20/2011   | Kitchen Sink             | Valley               |                                                      |                 |               |               |                  |                |                |            |                 |            |                 |                 |
| 830           | 7/20/2011   | Outside Spigot           | Upland               |                                                      |                 |               |               |                  |                |                |            |                 |            |                 |                 |
| 831           | 7/20/2011   | Kitchen Sink             | Valley               |                                                      |                 |               |               |                  |                |                |            |                 |            |                 |                 |
| 832           | 7/20/2011   | Kitchen Sink             | Valley               |                                                      |                 |               |               |                  |                |                |            |                 |            |                 |                 |
| 833           | 7/20/2011   | Outside Faucet           | Valley               |                                                      |                 |               |               |                  |                |                |            |                 |            |                 |                 |
| 834           | 7/20/2011   | Kitchen Sink             | Upland               |                                                      |                 |               |               |                  |                |                |            |                 |            |                 |                 |
| 835           | 7/20/2011   | Kitchen Sink             | Upland               |                                                      |                 |               |               |                  |                |                |            |                 |            |                 |                 |
| 836           | 7/21/2011   | Outside Faucet           | Upland               |                                                      |                 |               |               |                  |                |                |            |                 |            |                 |                 |
| 837           | 7/21/2011   | Spigot In Front Of House | Upland               |                                                      |                 |               |               |                  |                |                |            |                 |            |                 |                 |
| 838           | 7/21/2011   | Kitchen Sink             | Valley               |                                                      |                 |               |               |                  |                |                |            |                 |            |                 |                 |
| 839           | 7/21/2011   | Kitchen Sink             | Upland               |                                                      |                 |               |               |                  |                |                |            |                 |            |                 |                 |
| 840           | 7/21/2011   | Kitchen Sink             | Upland               |                                                      |                 |               |               |                  |                |                |            |                 |            |                 |                 |

Table S.8. Groundwater Quality Data for 1701 "Pre-Drill" Water Well Samples from Susquehanna County, Pennsylvania

| Water Well ID | Sample Date | Sampling Port             | Topographic Location | Gas Extraction Area (Within 1 km of Active Gas Well) | Selenium (mg/L) | Silver (mg/L) | Sodium (mg/L) | Strontium (mg/L) | Sulfate (mg/L) | Sulfide (mg/L) | TDS (mg/L) | Thallium (mg/L) | TSS (mg/L) | Turbidity (NTU) | Vanadium (mg/L) |
|---------------|-------------|---------------------------|----------------------|------------------------------------------------------|-----------------|---------------|---------------|------------------|----------------|----------------|------------|-----------------|------------|-----------------|-----------------|
| 841           | 7/21/2011   | Kitchen Sink              | Valley               |                                                      |                 |               |               |                  |                |                |            |                 |            |                 |                 |
| 842           | 7/21/2011   | Kitchen Sink              | Valley               |                                                      |                 |               |               |                  |                |                |            |                 |            |                 |                 |
| 843           | 7/21/2011   | Kitchen Sink              | Upland               |                                                      |                 |               |               |                  |                |                |            |                 |            |                 |                 |
| 844           | 7/21/2011   | Pressure Tank             | Upland               |                                                      |                 |               |               |                  |                |                |            |                 |            |                 |                 |
| 845           | 7/21/2011   | Basement Sink             | Upland               |                                                      |                 |               |               |                  |                |                |            |                 |            |                 |                 |
| 846           | 7/21/2011   | Kitchen Sink              | Upland               |                                                      |                 |               |               |                  |                |                |            |                 |            |                 |                 |
| 847           | 7/21/2011   | Spigot In Rear Of House   | Upland               |                                                      |                 |               |               |                  |                |                |            |                 |            |                 |                 |
| 848           | 7/21/2011   | Kitchen Sink              | Valley               |                                                      |                 |               |               |                  |                |                |            |                 |            |                 |                 |
| 849           | 7/21/2011   | Kitchen Sink              | Valley               |                                                      |                 |               |               |                  |                |                |            |                 |            |                 |                 |
| 850           | 7/22/2011   | Kitchen Sink              | Valley               |                                                      |                 |               |               |                  |                |                |            |                 |            |                 |                 |
| 851           | 7/22/2011   | Outside Spigot            | Valley               |                                                      |                 |               |               |                  |                |                |            |                 |            |                 |                 |
| 852           | 7/22/2011   | Kitchen Sink              | Valley               |                                                      |                 |               |               |                  |                |                |            |                 |            |                 |                 |
| 853           | 7/22/2011   | Kitchen Sink              | Valley               |                                                      |                 |               |               |                  |                |                |            |                 |            |                 |                 |
| 854           | 7/22/2011   | Kitchen Sink              | Valley               |                                                      |                 |               |               |                  |                |                |            |                 |            |                 |                 |
| 855           | 7/22/2011   | Pipe Overflow             | Valley               |                                                      |                 |               |               |                  |                |                |            |                 |            |                 |                 |
| 856           | 7/22/2011   | Kitchen Sink              | Valley               |                                                      |                 |               |               |                  |                |                |            |                 |            |                 |                 |
| 857           | 7/22/2011   | Pressure Tank In Garage   | Valley               |                                                      |                 |               |               |                  |                |                |            |                 |            |                 |                 |
| 858           | 11/5/2009   | Basement At Pressure Tank | Valley               | Yes                                                  |                 |               |               | 0.515            |                | < 1            | 156        |                 | < 2        |                 |                 |
| 859           | 7/22/2011   | Outside Spigot            | Valley               |                                                      |                 |               |               |                  |                |                |            |                 |            |                 |                 |
| 860           | 7/22/2011   | Kitchen Faucet            | Valley               |                                                      |                 |               |               |                  |                |                |            |                 |            |                 |                 |
| 861           | 7/22/2011   | Spigot Under Porch        | Valley               |                                                      |                 |               |               |                  |                |                |            |                 |            |                 |                 |
| 862           | 7/22/2011   | Kitchen Sink              | Valley               |                                                      |                 |               |               |                  |                |                |            |                 |            |                 |                 |
| 863           | 7/22/2011   | Pressure Tank In Garage   | Valley               |                                                      |                 |               |               |                  |                |                |            |                 |            |                 |                 |

Table S.8. Groundwater Quality Data for 1701 "Pre-Drill" Water Well Samples from Susquehanna County, Pennsylvania

| Water Well ID | Sample Date | Sampling Port       | Topographic Location | Gas Extraction Area (Within 1 km of Active Gas Well) | Selenium (mg/L) | Silver (mg/L) | Sodium (mg/L) | Strontium (mg/L) | Sulfate (mg/L) | Sulfide (mg/L) | TDS (mg/L) | Thallium (mg/L) | TSS (mg/L) | Turbidity (NTU) | Vanadium (mg/L) |
|---------------|-------------|---------------------|----------------------|------------------------------------------------------|-----------------|---------------|---------------|------------------|----------------|----------------|------------|-----------------|------------|-----------------|-----------------|
| 864           | 7/22/2011   | Kitchen Sink        | Upland               |                                                      |                 |               |               |                  |                |                |            |                 |            |                 |                 |
| 865           | 7/22/2011   | Kitchen Sink        | Upland               |                                                      |                 |               |               |                  |                |                |            |                 |            |                 |                 |
| 866           | 7/22/2011   | Kitchen Sink        | Upland               |                                                      |                 |               |               |                  |                |                |            |                 |            |                 |                 |
| 867           | 11/5/2009   | Kitchen Sink        | Upland               | Yes                                                  |                 |               |               | < .025           |                | < 1            | 178        |                 | < 2        |                 |                 |
| 868           | 7/22/2011   | Kitchen Sink        | Valley               |                                                      |                 |               |               |                  |                |                |            |                 |            |                 |                 |
| 869           | 7/22/2011   | Pressure Tank       | Valley               |                                                      |                 |               |               |                  |                |                |            |                 |            |                 |                 |
| 870           | 7/25/2011   | Kitchen Sink        | Valley               |                                                      |                 |               |               |                  |                |                |            |                 |            |                 |                 |
| 871           | 7/25/2011   | Kitchen Sink        | Valley               |                                                      |                 |               |               |                  |                |                |            |                 |            |                 |                 |
| 872           | 7/25/2011   | Kitchen Sink        | Upland               |                                                      |                 |               |               |                  |                |                |            |                 |            |                 |                 |
| 873           | 7/25/2011   | Kitchen Sink        | Upland               |                                                      |                 |               |               |                  |                |                |            |                 |            |                 |                 |
| 874           | 7/25/2011   | Kitchen Sink        | Upland               |                                                      |                 |               |               |                  |                |                |            |                 |            |                 |                 |
| 875           | 7/25/2011   | Kitchen Sink        | Upland               |                                                      |                 |               |               |                  |                |                |            |                 |            |                 |                 |
| 876           | 7/25/2011   | Warehouse At Quarry | Upland               |                                                      |                 |               |               |                  |                |                |            |                 |            |                 |                 |
| 877           | 7/25/2011   | Kitchen Sink        | Valley               |                                                      |                 |               |               |                  |                |                |            |                 |            |                 |                 |
| 878           | 7/25/2011   | Kitchen Sink        | Upland               |                                                      |                 |               |               |                  |                |                |            |                 |            |                 |                 |
| 879           | 7/25/2011   | Kitchen Sink        | Valley               |                                                      |                 |               |               |                  |                |                |            |                 |            |                 |                 |
| 880           | 1/3/2010    | Pressure Tank       | Upland               | Yes                                                  |                 |               |               | 0.594            |                | < 1            | 132        |                 | < 2        | < 1             |                 |
| 881           | 7/25/2011   | Kitchen Sink        | Valley               |                                                      |                 |               |               |                  |                |                |            |                 |            |                 |                 |
| 882           | 7/25/2011   | Pressure Tank       | Valley               |                                                      |                 |               |               |                  |                |                |            |                 |            |                 |                 |
| 883           | 7/26/2011   | Kitchen Sink        | Valley               |                                                      |                 |               |               |                  |                |                |            |                 |            |                 |                 |
| 884           | 7/26/2011   | Kitchen Sink        | Valley               |                                                      |                 |               |               |                  |                |                |            |                 |            |                 |                 |
| 885           | 7/26/2011   | Kitchen Sink        | Valley               |                                                      |                 |               |               |                  |                |                |            |                 |            |                 |                 |
| 886           | 7/26/2011   | Kitchen Sink        | Valley               |                                                      |                 |               |               |                  |                |                |            |                 |            |                 |                 |
| 887           | 7/26/2011   | Kitchen Sink        | Valley               |                                                      |                 |               |               |                  |                |                |            |                 |            |                 |                 |
| 888           | 12/22/2009  | Pressure Tank       | Upland               | Yes                                                  |                 |               |               | 0.046            |                | < 1            | 64         |                 | < 2        | < 1             |                 |

Table S.8. Groundwater Quality Data for 1701 "Pre-Drill" Water Well Samples from Susquehanna County, Pennsylvania

| Water Well ID | Sample Date | Sampling Port   | Topographic Location | Gas Extraction Area (Within 1 km of Active Gas Well) | Selenium (mg/L) | Silver (mg/L) | Sodium (mg/L) | Strontium (mg/L) | Sulfate (mg/L) | Sulfide (mg/L) | TDS (mg/L) | Thallium (mg/L) | TSS (mg/L) | Turbidity (NTU) | Vanadium (mg/L) |
|---------------|-------------|-----------------|----------------------|------------------------------------------------------|-----------------|---------------|---------------|------------------|----------------|----------------|------------|-----------------|------------|-----------------|-----------------|
| 889           | 7/26/2011   | Kitchen Sink    | Upland               |                                                      |                 |               |               |                  |                |                |            |                 |            |                 |                 |
| 890           | 7/26/2011   | Pipe From Well  | Valley               |                                                      |                 |               |               |                  |                |                |            |                 |            |                 |                 |
| 891           | 7/26/2011   | Outside Spigot  | Upland               |                                                      |                 |               |               |                  |                |                |            |                 |            |                 |                 |
| 892           | 7/26/2011   | Outside Spigot  | Valley               |                                                      |                 |               |               |                  |                |                |            |                 |            |                 |                 |
| 893           | 7/26/2011   | Outside Spigot  | Upland               |                                                      |                 |               |               |                  |                |                |            |                 |            |                 |                 |
| 894           | 7/26/2011   | Kitchen Sink    | Valley               |                                                      |                 |               |               |                  |                |                |            |                 |            |                 |                 |
| 895           | 12/15/2009  | Pressure Tank   | Upland               |                                                      |                 |               |               | 0.291            |                | < 1            | 184        |                 | < 2        | < 1             |                 |
| 896           | 7/26/2011   | Outside Spigot  | Upland               |                                                      |                 |               |               |                  |                |                |            |                 |            |                 |                 |
| 897           | 7/26/2011   | Kitchen Sink    | Valley               |                                                      |                 |               |               |                  |                |                |            |                 |            |                 |                 |
| 898           | 7/26/2011   | Outside Spigot  | Upland               |                                                      |                 |               |               |                  |                |                |            |                 |            |                 |                 |
| 899           | 7/26/2011   | Kitchen Sink    | Upland               |                                                      |                 |               |               |                  |                |                |            |                 |            |                 |                 |
| 900           | 7/26/2011   | Kitchen Sink    | Upland               |                                                      |                 |               |               |                  |                |                |            |                 |            |                 |                 |
| 901           | 7/27/2011   | Kitchen Sink    | Upland               |                                                      |                 |               |               |                  |                |                |            |                 |            |                 |                 |
| 902           | 7/27/2011   | Outside Faucet  | Valley               |                                                      |                 |               |               |                  |                |                |            |                 |            |                 |                 |
| 903           | 7/27/2011   | Basement Spigot | Valley               |                                                      |                 |               |               |                  |                |                |            |                 |            |                 |                 |
| 904           | 12/17/2009  | Pressure Tank   | Valley               | Yes                                                  |                 |               |               | 1.6              |                | 6              | 120        |                 | < 2        | < 1             |                 |
| 905           | 7/27/2011   | Kitchen Sink    | Valley               |                                                      |                 |               |               |                  |                |                |            |                 |            |                 |                 |
| 906           | 7/27/2011   | Kitchen Sink    | Valley               |                                                      |                 |               |               |                  |                |                |            |                 |            |                 |                 |
| 907           | 7/27/2011   | Kitchen Sink    | Upland               |                                                      |                 |               |               |                  |                |                |            |                 |            |                 |                 |
| 908           | 7/27/2011   | Pipe Overflow   | Valley               |                                                      |                 |               |               |                  |                |                |            |                 |            |                 |                 |
| 909           | 7/27/2011   | Pressure Tank   | Upland               |                                                      |                 |               |               |                  |                |                |            |                 |            |                 |                 |
| 910           | 7/27/2011   | Kitchen Sink    | Upland               |                                                      |                 |               |               |                  |                |                |            |                 |            |                 |                 |
| 911           | 7/27/2011   | Kitchen Sink    | Upland               |                                                      |                 |               |               |                  |                |                |            |                 |            |                 |                 |
| 912           | 7/27/2011   | Outside Spigot  | Valley               |                                                      |                 |               |               |                  |                |                |            |                 |            |                 |                 |
| 913           | 7/27/2011   | Kitchen Sink    | Valley               |                                                      |                 |               |               |                  |                |                |            |                 |            |                 |                 |

Table S.8. Groundwater Quality Data for 1701 "Pre-Drill" Water Well Samples from Susquehanna County, Pennsylvania

| Water Well ID | Sample Date | Sampling Port             | Topographic Location | Gas Extraction Area (Within 1 km of Active Gas Well) | Selenium (mg/L) | Silver (mg/L) | Sodium (mg/L) | Strontium (mg/L) | Sulfate (mg/L) | Sulfide (mg/L) | TDS (mg/L) | Thallium (mg/L) | TSS (mg/L) | Turbidity (NTU) | Vanadium (mg/L) |
|---------------|-------------|---------------------------|----------------------|------------------------------------------------------|-----------------|---------------|---------------|------------------|----------------|----------------|------------|-----------------|------------|-----------------|-----------------|
| 914           | 7/27/2011   | Kitchen Sink              | Upland               |                                                      |                 |               |               |                  |                |                |            |                 |            |                 |                 |
| 915           | 7/27/2011   | Kitchen Sink              | Upland               |                                                      |                 |               |               |                  |                |                |            |                 |            |                 |                 |
| 916           | 7/28/2011   | Kitchen Sink              | Upland               |                                                      |                 |               |               |                  |                |                |            |                 |            |                 |                 |
| 917           | 7/28/2011   | Kitchen Sink              | Valley               |                                                      |                 |               |               |                  |                |                |            |                 |            |                 |                 |
| 918           | 7/28/2011   | Kitchen Sink              | Upland               |                                                      |                 |               |               |                  |                |                |            |                 |            |                 |                 |
| 919           | 7/28/2011   | Kitchen Sink              | Upland               |                                                      |                 |               |               |                  |                |                |            |                 |            |                 |                 |
| 920           | 7/28/2011   | Kitchen Sink              | Valley               |                                                      |                 |               |               |                  |                |                |            |                 |            |                 |                 |
| 921           | 7/28/2011   | Outside Spigot            | Valley               | Yes                                                  |                 |               |               |                  |                |                |            |                 |            |                 |                 |
| 922           | 7/29/2011   | Kitchen Sink              | Valley               |                                                      |                 |               |               |                  |                |                |            |                 |            |                 |                 |
| 923           | 12/14/2009  | Basement At Pressure Tank | Valley               | Yes                                                  |                 |               |               | 0.319            |                | < 1            | 164        |                 | < 2        | < 1             |                 |
| 924           | 12/17/2009  | Kitchen Sink              | Valley               |                                                      |                 |               |               | 0.514            |                | < 1            | 152        |                 | < 2        | < 1             |                 |
| 925           | 12/13/2009  | Pressure Tank             | Valley               |                                                      |                 |               |               | 0.034            |                | < 1            | 56         |                 | < 2        | < 1             |                 |
| 926           | 7/29/2011   | Kitchen Sink              | Valley               |                                                      |                 |               |               |                  |                |                |            |                 |            |                 |                 |
| 927           | 7/29/2011   | Bathroom Sink             | Valley               |                                                      |                 |               |               |                  |                |                |            |                 |            |                 |                 |
| 928           | 7/29/2011   | Kitchen Sink              | Upland               |                                                      |                 |               |               |                  |                |                |            |                 |            |                 |                 |
| 929           | 7/29/2011   | Spigot On Side Of House   | Upland               |                                                      |                 |               |               |                  |                |                |            |                 |            |                 |                 |
| 930           | 7/29/2011   | Bathroom Sink             | Upland               |                                                      |                 |               |               |                  |                |                |            |                 |            |                 |                 |
| 931           | 12/21/2009  | Pressure Tank             | Valley               | Yes                                                  |                 |               |               | 0.468            |                | < 1            | 140        |                 | < 2        | 1               |                 |
| 932           | 7/29/2011   | Spigot On Side Of House   | Upland               |                                                      |                 |               |               |                  |                |                |            |                 |            |                 |                 |
| 933           | 7/30/2011   | Kitchen Sink              | Valley               |                                                      |                 |               |               |                  |                |                |            |                 |            |                 |                 |
| 934           | 7/30/2011   | Outside Spigot            | Valley               |                                                      |                 |               |               |                  |                |                |            |                 |            |                 |                 |
| 935           | 7/30/2011   | Kitchen Sink              | Upland               |                                                      |                 |               |               |                  |                |                |            |                 |            |                 |                 |
| 936           | 7/30/2011   | Basement Sink             | Upland               |                                                      |                 |               |               |                  |                |                |            |                 |            |                 |                 |
| 937           | 7/30/2011   | Outside Spigot            | Valley               |                                                      |                 |               |               |                  |                |                |            |                 |            |                 |                 |

Table S.8. Groundwater Quality Data for 1701 "Pre-Drill" Water Well Samples from Susquehanna County, Pennsylvania

| Water Well ID | Sample Date | Sampling Port                 | Topographic Location | Gas Extraction Area (Within 1 km of Active Gas Well) | Selenium (mg/L) | Silver (mg/L) | Sodium (mg/L) | Strontium (mg/L) | Sulfate (mg/L) | Sulfide (mg/L) | TDS (mg/L) | Thallium (mg/L) | TSS (mg/L) | Turbidity (NTU) | Vanadium (mg/L) |
|---------------|-------------|-------------------------------|----------------------|------------------------------------------------------|-----------------|---------------|---------------|------------------|----------------|----------------|------------|-----------------|------------|-----------------|-----------------|
| 938           | 7/30/2011   | Pressure Tank                 | Valley               |                                                      |                 |               |               |                  |                |                |            |                 |            |                 |                 |
| 939           | 7/30/2011   | Kitchen Sink                  | Upland               |                                                      |                 |               |               |                  |                |                |            |                 |            |                 |                 |
| 940           | 7/30/2011   | Kitchen Sink                  | Upland               |                                                      |                 |               |               |                  |                |                |            |                 |            |                 |                 |
| 941           | 8/1/2011    | Outside Spigot                | Valley               |                                                      |                 |               |               |                  |                |                |            |                 |            |                 |                 |
| 942           | 8/1/2011    | Kitchen Sink                  | Upland               |                                                      |                 |               |               |                  |                |                |            |                 |            |                 |                 |
| 943           | 8/1/2011    | Kitchen Sink                  | Valley               |                                                      |                 |               |               |                  |                |                |            |                 |            |                 |                 |
| 944           | 8/1/2011    | Kitchen Sink                  | Valley               |                                                      |                 |               |               |                  |                |                |            |                 |            |                 |                 |
| 945           | 8/1/2011    | Pressure Tank                 | Upland               | Yes                                                  |                 |               |               |                  |                |                |            |                 |            |                 |                 |
| 946           | 8/1/2011    | Outside Spigot                | Valley               |                                                      |                 |               |               |                  |                |                |            |                 |            |                 |                 |
| 947           | 12/21/2009  | Pressure Tank-Tenants House   | Upland               |                                                      |                 |               |               | 0.569            |                | < 1            | 124        |                 | < 2        | < 1             |                 |
| 948           | 8/1/2011    | Kitchen Sink                  | Upland               |                                                      |                 |               |               |                  |                |                |            |                 |            |                 |                 |
| 949           | 8/1/2011    | Spigot On Garage              | Valley               |                                                      |                 |               |               |                  |                |                |            |                 |            |                 |                 |
| 950           | 8/1/2011    | Spigot On South Side Of House | Valley               |                                                      |                 |               |               |                  |                |                |            |                 |            |                 |                 |
| 951           | 8/1/2011    | Shop Sink                     | Upland               |                                                      |                 |               |               |                  |                |                |            |                 |            |                 |                 |
| 952           | 8/1/2011    | Pressure Tank                 | Valley               |                                                      |                 |               |               |                  |                |                |            |                 |            |                 |                 |
| 953           | 8/2/2011    | Kitchen Sink                  | Upland               |                                                      |                 |               |               |                  |                |                |            |                 |            |                 |                 |
| 954           | 8/2/2011    | Kitchen Sink                  | Valley               |                                                      |                 |               |               |                  |                |                |            |                 |            |                 |                 |
| 955           | 8/2/2011    | Kitchen Sink                  | Valley               |                                                      |                 |               |               |                  |                |                |            |                 |            |                 |                 |
| 956           | 8/2/2011    | Kitchen Sink                  | Valley               |                                                      |                 |               |               |                  |                |                |            |                 |            |                 |                 |
| 957           | 8/2/2011    | Kitchen Sink                  | Upland               |                                                      |                 |               |               |                  |                |                |            |                 |            |                 |                 |
| 958           | 8/2/2011    | Pressure Tank                 | Valley               |                                                      |                 |               |               |                  |                |                |            |                 |            |                 |                 |
| 959           | 8/2/2011    | Kitchen Sink                  | Upland               |                                                      |                 |               |               |                  |                |                |            |                 |            |                 |                 |
| 960           | 8/2/2011    | Kitchen Sink                  | Upland               |                                                      |                 |               |               |                  |                |                |            |                 |            |                 |                 |

Table S.8. Groundwater Quality Data for 1701 "Pre-Drill" Water Well Samples from Susquehanna County, Pennsylvania

| Water Well ID | Sample Date | Sampling Port                               | Topographic Location | Gas Extraction Area (Within 1 km of Active Gas Well) | Selenium (mg/L) | Silver (mg/L) | Sodium (mg/L) | Strontium (mg/L) | Sulfate (mg/L) | Sulfide (mg/L) | TDS (mg/L) | Thallium (mg/L) | TSS (mg/L) | Turbidity (NTU) | Vanadium (mg/L) |
|---------------|-------------|---------------------------------------------|----------------------|------------------------------------------------------|-----------------|---------------|---------------|------------------|----------------|----------------|------------|-----------------|------------|-----------------|-----------------|
| 961           | 8/2/2011    | Spigot Across The Road From Office Building | Valley               |                                                      |                 |               |               |                  |                |                |            |                 |            |                 |                 |
| 962           | 8/2/2011    | Kitchen Sink                                | Upland               |                                                      |                 |               |               |                  |                |                |            |                 |            |                 |                 |
| 963           | 8/5/2011    | Kitchen Sink                                | Valley               |                                                      |                 |               |               |                  |                |                |            |                 |            |                 |                 |
| 964           | 8/5/2011    | Kitchen Sink                                | Valley               |                                                      |                 |               |               |                  |                |                |            |                 |            |                 |                 |
| 965           | 8/5/2011    | Spigot On Side Of House                     | Valley               |                                                      |                 |               |               |                  |                |                |            |                 |            |                 |                 |
| 966           | 8/5/2011    | Spigot In Shed Behind House                 | Upland               |                                                      |                 |               |               |                  |                |                |            |                 |            |                 |                 |
| 967           | 8/5/2011    | Pressure Tank                               | Valley               |                                                      |                 |               |               |                  |                |                |            |                 |            |                 |                 |
| 968           | 8/5/2011    | Kitchen Sink                                | Upland               | Yes                                                  |                 |               |               |                  |                |                |            |                 |            |                 |                 |
| 969           | 8/5/2011    | Outside Spigot                              | Valley               |                                                      |                 |               |               |                  |                |                |            |                 |            |                 |                 |
| 970           | 12/15/2009  | Pressure Tank                               | Upland               | Yes                                                  |                 |               |               | 0.122            |                | < 1            | 118        |                 | 20.5       | 2               |                 |
| 971           | 8/5/2011    | Kitchen Sink                                | Upland               |                                                      |                 |               |               |                  |                |                |            |                 |            |                 |                 |
| 972           | 8/5/2011    | Kitchen Sink                                | Upland               |                                                      |                 |               |               |                  |                |                |            |                 |            |                 |                 |
| 973           | 8/5/2011    | Outside Spigot                              | Valley               |                                                      |                 |               |               |                  |                |                |            |                 |            |                 |                 |
| 974           | 8/5/2011    | Outside Spigot                              | Valley               |                                                      |                 |               |               |                  |                |                |            |                 |            |                 |                 |
| 975           | 8/5/2011    | Spigot On Side Of House                     | Upland               |                                                      |                 |               |               |                  |                |                |            |                 |            |                 |                 |
| 976           | 8/5/2011    | Spigot On Side Of House                     | Upland               |                                                      |                 |               |               |                  |                |                |            |                 |            |                 |                 |
| 977           | 8/5/2011    | Kitchen Sink                                | Upland               |                                                      |                 |               |               |                  |                |                |            |                 |            |                 |                 |
| 978           | 8/5/2011    | Spigot On Side Of House                     | Upland               |                                                      |                 |               |               |                  |                |                |            |                 |            |                 |                 |
| 979           | 8/5/2011    | Well                                        | Upland               |                                                      |                 |               |               |                  |                |                |            |                 |            |                 |                 |
| 980           | 8/5/2011    | Pressure Tank                               | Upland               |                                                      |                 |               |               |                  |                |                |            |                 |            |                 |                 |
| 981           | 8/5/2011    | Kitchen Sink                                | Upland               |                                                      |                 |               |               |                  |                |                |            |                 |            |                 |                 |

Table S.8. Groundwater Quality Data for 1701 "Pre-Drill" Water Well Samples from Susquehanna County, Pennsylvania

| Water Well ID | Sample Date | Sampling Port             | Topographic Location | Gas Extraction Area (Within 1 km of Active Gas Well) | Selenium (mg/L) | Silver (mg/L) | Sodium (mg/L) | Strontium (mg/L) | Sulfate (mg/L) | Sulfide (mg/L) | TDS (mg/L) | Thallium (mg/L) | TSS (mg/L) | Turbidity (NTU) | Vanadium (mg/L) |
|---------------|-------------|---------------------------|----------------------|------------------------------------------------------|-----------------|---------------|---------------|------------------|----------------|----------------|------------|-----------------|------------|-----------------|-----------------|
| 982           | 8/5/2011    | Kitchen Faucet            | Valley               |                                                      |                 |               |               |                  |                |                |            |                 |            |                 |                 |
| 983           | 1/4/2010    | Well                      | Valley               | Yes                                                  |                 |               |               | 0.831            |                | 6              | 160        |                 | < 2        | < 1             |                 |
| 984           | 8/5/2011    | Outside Faucet            | Valley               |                                                      |                 |               |               |                  |                |                |            |                 |            |                 |                 |
| 985           | 8/5/2011    | Kitchen Sink              | Upland               |                                                      |                 |               |               |                  |                |                |            |                 |            |                 |                 |
| 986           | 8/8/2011    | Pressure Tank             | Valley               |                                                      |                 |               |               |                  |                |                |            |                 |            |                 |                 |
| 987           | 8/8/2011    | Kitchen Sink              | Valley               |                                                      |                 |               |               |                  |                |                |            |                 |            |                 |                 |
| 988           | 8/8/2011    | Kitchen Sink              | Valley               |                                                      |                 |               |               |                  |                |                |            |                 |            |                 |                 |
| 989           | 8/8/2011    |                           | Upland               |                                                      |                 |               |               |                  |                |                |            |                 |            |                 |                 |
| 990           | 8/8/2011    | Kitchen Sink              | Valley               |                                                      |                 |               |               |                  |                |                |            |                 |            |                 |                 |
| 991           | 8/8/2011    | Kitchen Sink              | Upland               |                                                      |                 |               |               |                  |                |                |            |                 |            |                 |                 |
| 992           | 8/8/2011    | Kitchen Sink              | Upland               |                                                      |                 |               |               |                  |                |                |            |                 |            |                 |                 |
| 993           | 8/8/2011    | Outside Spigot            | Upland               |                                                      |                 |               |               |                  |                |                |            |                 |            |                 |                 |
| 994           | 8/8/2011    | Kitchen Sink              | Valley               |                                                      |                 |               |               |                  |                |                |            |                 |            |                 |                 |
| 995           | 8/8/2011    | Kitchen Sink              | Valley               |                                                      |                 |               |               |                  |                |                |            |                 |            |                 |                 |
| 996           | 8/8/2011    | Spigoton Side Of House    | Upland               |                                                      |                 |               |               |                  |                |                |            |                 |            |                 |                 |
| 997           | 8/8/2011    | Sink In Garage            | Upland               |                                                      |                 |               |               |                  |                |                |            |                 |            |                 |                 |
| 998           | 8/8/2011    | Kitchen Sink              | Upland               |                                                      |                 |               |               |                  |                |                |            |                 |            |                 |                 |
| 999           | 8/8/2011    |                           | Valley               |                                                      |                 |               |               |                  |                |                |            |                 |            |                 |                 |
| 1000          | 8/8/2011    | Outside Spigot            | Upland               |                                                      |                 |               |               |                  |                |                |            |                 |            |                 |                 |
| 1001          | 8/9/2011    | Basement Sink             | Upland               |                                                      |                 |               |               |                  |                |                |            |                 |            |                 |                 |
| 1002          | 8/9/2011    | Kitchen Sink              | Valley               |                                                      |                 |               |               |                  |                |                |            |                 |            |                 |                 |
| 1003          | 8/9/2011    | Pressure Tank             | Valley               |                                                      |                 |               |               |                  |                |                |            |                 |            |                 |                 |
| 1004          | 8/9/2011    | Pressure Tank             | Valley               |                                                      |                 |               |               |                  |                |                |            |                 |            |                 |                 |
| 1005          | 8/9/2011    | Kitchen Sink              | Valley               |                                                      |                 |               |               |                  |                |                |            |                 |            |                 |                 |
| 1006          | 8/9/2011    | Outside Spigot            | Valley               |                                                      |                 |               |               |                  |                |                |            |                 |            |                 |                 |
| 1007          | 12/14/2009  | Basement At Pressure Tank | Valley               |                                                      |                 |               |               | 0.512            |                | 4              | 152        |                 | < 2        | 1               |                 |



Table S.8. Groundwater Quality Data for 1701 "Pre-Drill" Water Well Samples from Susquehanna County, Pennsylvania

| Water Well ID | Sample Date | Sampling Port                | Topographic Location | Gas Extraction Area (Within 1 km of Active Gas Well) | Selenium (mg/L) | Silver (mg/L) | Sodium (mg/L) | Strontium (mg/L) | Sulfate (mg/L) | Sulfide (mg/L) | TDS (mg/L) | Thallium (mg/L) | TSS (mg/L) | Turbidity (NTU) | Vanadium (mg/L) |
|---------------|-------------|------------------------------|----------------------|------------------------------------------------------|-----------------|---------------|---------------|------------------|----------------|----------------|------------|-----------------|------------|-----------------|-----------------|
| 1008          | 8/9/2011    | Bathroom Sink                | Valley               |                                                      |                 |               |               |                  |                |                |            |                 |            |                 |                 |
| 1009          | 8/9/2011    | Outside Spigot               | Valley               |                                                      |                 |               |               |                  |                |                |            |                 |            |                 |                 |
| 1010          | 8/9/2011    | Kitchen Sink                 | Upland               |                                                      |                 |               |               |                  |                |                |            |                 |            |                 |                 |
| 1011          | 8/9/2011    | Kitchen Sink                 | Upland               |                                                      |                 |               |               |                  |                |                |            |                 |            |                 |                 |
| 1012          | 8/9/2011    | Kitchen Sink                 | Upland               |                                                      |                 |               |               |                  |                |                |            |                 |            |                 |                 |
| 1013          | 8/9/2011    | Kitchen Sink                 | Valley               |                                                      |                 |               |               |                  |                |                |            |                 |            |                 |                 |
| 1014          | 8/9/2011    | Kitchen Sink                 | Upland               |                                                      |                 |               |               |                  |                |                |            |                 |            |                 |                 |
| 1015          | 8/9/2011    | Kitchen Sink                 | Upland               |                                                      |                 |               |               |                  |                |                |            |                 |            |                 |                 |
| 1016          | 8/9/2011    | Kitchen Sink                 | Upland               |                                                      |                 |               |               |                  |                |                |            |                 |            |                 |                 |
| 1017          | 7/11/2011   | Spigot On Side Of House      | Upland               |                                                      |                 |               |               |                  |                |                |            |                 |            |                 |                 |
| 1018          | 7/12/2011   | Bathroom Sink                | Valley               |                                                      |                 |               |               |                  |                |                |            |                 |            |                 |                 |
| 1019          | 7/12/2011   | Sink In Rear Of Far Building | Valley               |                                                      |                 |               |               |                  |                |                |            |                 |            |                 |                 |
| 1020          | 7/21/2011   | Basement Sink                | Upland               |                                                      |                 |               |               |                  |                |                |            |                 |            |                 |                 |
| 1021          | 7/22/2011   | Kitchen Faucet               | Upland               |                                                      |                 |               |               |                  |                |                |            |                 |            |                 |                 |
| 1022          | 7/25/2011   | Spigot Outside Barn          | Valley               |                                                      |                 |               |               |                  |                |                |            |                 |            |                 |                 |
| 1023          | 7/25/2011   | Kitchen Sink                 | Upland               |                                                      |                 |               |               |                  |                |                |            |                 |            |                 |                 |
| 1024          | 7/26/2011   | Outside Spigot               | Upland               |                                                      |                 |               |               |                  |                |                |            |                 |            |                 |                 |
| 1025          | 7/28/2011   |                              | Valley               |                                                      |                 |               |               |                  |                |                |            |                 |            |                 |                 |
| 1026          | 8/1/2011    | Kitchen Sink                 | Valley               |                                                      |                 |               |               |                  |                |                |            |                 |            |                 |                 |
| 1027          | 8/1/2011    | Kitchen Sink                 | Valley               |                                                      |                 |               |               |                  |                |                |            |                 |            |                 |                 |
| 1028          | 8/1/2011    | Outside Spigot               | Upland               |                                                      |                 |               |               |                  |                |                |            |                 |            |                 |                 |
| 1029          | 8/2/2011    | Pipe Overflow                | Valley               |                                                      |                 |               |               |                  |                |                |            |                 |            |                 |                 |
| 1030          | 8/2/2011    | Kitchen Faucet               | Valley               |                                                      |                 |               |               |                  |                |                |            |                 |            |                 |                 |

Table S.8. Groundwater Quality Data for 1701 "Pre-Drill" Water Well Samples from Susquehanna County, Pennsylvania

| Water Well ID | Sample Date | Sampling Port                 | Topographic Location | Gas Extraction Area (Within 1 km of Active Gas Well) | Selenium (mg/L) | Silver (mg/L) | Sodium (mg/L) | Strontium (mg/L) | Sulfate (mg/L) | Sulfide (mg/L) | TDS (mg/L) | Thallium (mg/L) | TSS (mg/L) | Turbidity (NTU) | Vanadium (mg/L) |
|---------------|-------------|-------------------------------|----------------------|------------------------------------------------------|-----------------|---------------|---------------|------------------|----------------|----------------|------------|-----------------|------------|-----------------|-----------------|
| 1031          | 8/3/2011    | Garage Building Next To House | Valley               |                                                      |                 |               |               |                  |                |                |            |                 |            |                 |                 |
| 1032          | 8/3/2011    | Kitchen Sink                  | Upland               |                                                      |                 |               |               |                  |                |                |            |                 |            |                 |                 |
| 1033          | 8/3/2011    | Outside Faucet                | Upland               |                                                      |                 |               |               |                  |                |                |            |                 |            |                 |                 |
| 1034          | 8/3/2011    | Kitchen Faucet                | Valley               |                                                      |                 |               |               |                  |                |                |            |                 |            |                 |                 |
| 1035          | 12/15/2009  | Well House                    | Valley               | Yes                                                  |                 |               |               | 0.968            |                | 4              | 408        |                 | < 2        | < 1             |                 |
| 1036          | 8/3/2011    | Pressure Tank                 | Upland               |                                                      |                 |               |               |                  |                |                |            |                 |            |                 |                 |
| 1037          | 8/3/2011    | Pressure Tank                 | Upland               |                                                      |                 |               |               |                  |                |                |            |                 |            |                 |                 |
| 1038          | 8/3/2011    | Kitchen Sink                  | Valley               |                                                      |                 |               |               |                  |                |                |            |                 |            |                 |                 |
| 1039          | 8/3/2011    | Outside Faucet                | Valley               | Yes                                                  |                 |               |               |                  |                |                |            |                 |            |                 |                 |
| 1040          | 8/3/2011    | Outside Faucet                | Valley               |                                                      |                 |               |               |                  |                |                |            |                 |            |                 |                 |
| 1041          | 8/3/2011    | Outside Faucet                | Upland               | Yes                                                  |                 |               |               |                  |                |                |            |                 |            |                 |                 |
| 1042          | 8/3/2011    | Kitchen Sink                  | Upland               |                                                      |                 |               |               |                  |                |                |            |                 |            |                 |                 |
| 1043          | 8/3/2011    | Pressure Tank                 | Valley               |                                                      |                 |               |               |                  |                |                |            |                 |            |                 |                 |
| 1044          | 1/3/2010    | Pressure Tank                 | Valley               |                                                      |                 |               |               | 0.051            |                | < 1            | 76         |                 | < 2        | 2               |                 |
| 1045          | 8/3/2011    | Spigot                        | Valley               |                                                      |                 |               |               |                  |                |                |            |                 |            |                 |                 |
| 1046          | 8/3/2011    | Barn Sink                     | Valley               |                                                      |                 |               |               |                  |                |                |            |                 |            |                 |                 |
| 1047          | 8/3/2011    | Kitchen Sink                  | Valley               |                                                      |                 |               |               |                  |                |                |            |                 |            |                 |                 |
| 1048          | 8/3/2011    | Kitchen Sink                  | Valley               |                                                      |                 |               |               |                  |                |                |            |                 |            |                 |                 |
| 1049          | 8/3/2011    | Outside Spigot                | Valley               |                                                      |                 |               |               |                  |                |                |            |                 |            |                 |                 |
| 1050          | 8/3/2011    | Kitchen Sink                  | Upland               |                                                      |                 |               |               |                  |                |                |            |                 |            |                 |                 |
| 1051          | 8/3/2011    | Kitchen Sink                  | Upland               |                                                      |                 |               |               |                  |                |                |            |                 |            |                 |                 |
| 1052          | 8/3/2011    | Kitchen Sink                  | Upland               |                                                      |                 |               |               |                  |                |                |            |                 |            |                 |                 |
| 1053          | 8/3/2011    | Kitchen Sink                  | Valley               |                                                      |                 |               |               |                  |                |                |            |                 |            |                 |                 |
| 1054          | 8/3/2011    | Pressure Tank In Basement     | Upland               |                                                      |                 |               |               |                  |                |                |            |                 |            |                 |                 |
| 1055          | 8/3/2011    | Kitchen Sink                  | Valley               |                                                      |                 |               |               |                  |                |                |            |                 |            |                 |                 |

Table S.8. Groundwater Quality Data for 1701 "Pre-Drill" Water Well Samples from Susquehanna County, Pennsylvania

| Water Well ID | Sample Date | Sampling Port              | Topographic Location | Gas Extraction Area (Within 1 km of Active Gas Well) | Selenium (mg/L) | Silver (mg/L) | Sodium (mg/L) | Strontium (mg/L) | Sulfate (mg/L) | Sulfide (mg/L) | TDS (mg/L) | Thallium (mg/L) | TSS (mg/L) | Turbidity (NTU) | Vanadium (mg/L) |
|---------------|-------------|----------------------------|----------------------|------------------------------------------------------|-----------------|---------------|---------------|------------------|----------------|----------------|------------|-----------------|------------|-----------------|-----------------|
| 1056          | 8/3/2011    | Kitchen Sink               | Upland               |                                                      |                 |               |               |                  |                |                |            |                 |            |                 |                 |
| 1057          | 8/4/2011    | Kitchen Sink               | Valley               |                                                      |                 |               |               |                  |                |                |            |                 |            |                 |                 |
| 1058          | 8/4/2011    | Outside Spigot             | Upland               |                                                      |                 |               |               |                  |                |                |            |                 |            |                 |                 |
| 1059          | 8/4/2011    | Outside Spigot             | Upland               |                                                      |                 |               |               |                  |                |                |            |                 |            |                 |                 |
| 1060          | 12/21/2009  | Laundry Sink               | Upland               |                                                      |                 |               |               | 0.385            |                | < 1            | 224        |                 | < 2        | < 1             |                 |
| 1061          | 8/4/2011    | Spigot On Side Of House    | Upland               |                                                      |                 |               |               |                  |                |                |            |                 |            |                 |                 |
| 1062          | 8/4/2011    | Spigot Behind House        | Valley               |                                                      |                 |               |               |                  |                |                |            |                 |            |                 |                 |
| 1063          | 8/4/2011    | Kitchen Sink               | Valley               |                                                      |                 |               |               |                  |                |                |            |                 |            |                 |                 |
| 1064          | 8/4/2011    | Kitchen Sink               | Valley               |                                                      |                 |               |               |                  |                |                |            |                 |            |                 |                 |
| 1065          | 8/4/2011    | Kitchen Sink               | Valley               |                                                      |                 |               |               |                  |                |                |            |                 |            |                 |                 |
| 1066          | 8/4/2011    | Outside Spigot             | Upland               |                                                      |                 |               |               |                  |                |                |            |                 |            |                 |                 |
| 1067          | 8/4/2011    | Kitchen Sink               | Upland               |                                                      |                 |               |               |                  |                |                |            |                 |            |                 |                 |
| 1068          | 8/4/2011    | Spigot In Rear Of Building | Valley               | Yes                                                  |                 |               |               |                  |                |                |            |                 |            |                 |                 |
| 1069          | 4/4/2009    | Bathroom Sink First Floor  | Valley               |                                                      |                 |               |               | 0.057            |                | < 1            | 64         |                 | < 2        |                 |                 |
| 1070          | 12/28/2009  | Kitchen Sink               | Upland               |                                                      |                 |               |               | 0.706            |                | < 1            | 132        |                 | < 2        | < 1             |                 |
| 1071          | 8/4/2011    | Pressure Tank              | Valley               | Yes                                                  |                 |               |               |                  |                |                |            |                 |            |                 |                 |
| 1072          | 8/4/2011    | Kitchen Sink               | Valley               | Yes                                                  |                 |               |               |                  |                |                |            |                 |            |                 |                 |
| 1073          | 8/4/2011    | Kitchen Sink               | Valley               | Yes                                                  |                 |               |               |                  |                |                |            |                 |            |                 |                 |
| 1074          | 8/4/2011    | Spigot In Warehouse        | Upland               |                                                      |                 |               |               |                  |                |                |            |                 |            |                 |                 |
| 1075          | 8/4/2011    | Kitchen Sink               | Upland               |                                                      |                 |               |               |                  |                |                |            |                 |            |                 |                 |
| 1076          | 8/4/2011    | Kitchen Sink               | Upland               |                                                      |                 |               |               |                  |                |                |            |                 |            |                 |                 |
| 1077          | 8/4/2011    | Kitchen Sink               | Valley               |                                                      |                 |               |               |                  |                |                |            |                 |            |                 |                 |

Table S.8. Groundwater Quality Data for 1701 "Pre-Drill" Water Well Samples from Susquehanna County, Pennsylvania

| Water Well ID | Sample Date | Sampling Port                            | Topographic Location | Gas Extraction Area (Within 1 km of Active Gas Well) | Selenium (mg/L) | Silver (mg/L) | Sodium (mg/L) | Strontium (mg/L) | Sulfate (mg/L) | Sulfide (mg/L) | TDS (mg/L) | Thallium (mg/L) | TSS (mg/L) | Turbidity (NTU) | Vanadium (mg/L) |
|---------------|-------------|------------------------------------------|----------------------|------------------------------------------------------|-----------------|---------------|---------------|------------------|----------------|----------------|------------|-----------------|------------|-----------------|-----------------|
| 1078          | 1/10/2010   | Little Farm House Basement Pressure Tank | Upland               |                                                      |                 |               |               | 0.066            |                | < 1            | 252        |                 | < 2        | < 1             |                 |
| 1079          | 8/4/2011    | Kitchen Sink                             | Upland               |                                                      |                 |               |               |                  |                |                |            |                 |            |                 |                 |
| 1080          | 8/4/2011    | Spigot On Side Of House                  | Valley               |                                                      |                 |               |               |                  |                |                |            |                 |            |                 |                 |
| 1081          | 8/4/2011    | Kitchen Sink                             | Upland               |                                                      |                 |               |               |                  |                |                |            |                 |            |                 |                 |
| 1082          | 8/4/2011    | Kitchen Sink                             | Valley               |                                                      |                 |               |               |                  |                |                |            |                 |            |                 |                 |
| 1083          | 7/11/2011   | Outside Hose Bib                         | Upland               | Yes                                                  | <0.005          | <0.001        | 32            | 0.12             | 13             | <3             | 170        |                 | <4         | <0.85           |                 |
| 1084          | 7/11/2011   | Basement At Pressure Tank                | Upland               | Yes                                                  | < .005          | < .001        | 91            | 0.14             | 14             | < 3            | 280        |                 | < 4        | < .85           |                 |
| 1085          | 12/21/2009  |                                          | Valley               | Yes                                                  |                 |               |               | 0.036            |                | < 1            | 68         |                 | < 2        | < 1             |                 |
| 1086          | 7/11/2011   | Bathroom Sink First Floor                | Valley               | Yes                                                  | < .005          | < .001        | 4.9           | 0.1              | 19             | < 3            | 150        |                 | < 4        | < .85           |                 |
| 1087          | 7/12/2011   | Outside Hose Bib                         | Upland               | Yes                                                  | < .005          | < .001        | 7.1           | 0.21             | 6.6            | < 3            | 110        |                 | < 4        | < .85           |                 |
| 1088          | 7/12/2011   | Kitchen Sink                             | Valley               | Yes                                                  | < .005          | < .001        | 11            | 0.4              | 14             | < 3            | 160        |                 | < 4        | < .85           |                 |
| 1089          | 7/12/2011   | Pressure Tank                            | Valley               | Yes                                                  | < .005          | < .001        | 12            | 0.61             | 11             | < 3            | 140        |                 | < 4        | 5.9             |                 |
| 1090          | 12/21/2009  | Pressure Tank                            | Valley               | Yes                                                  |                 |               |               | 2.97             |                | 4              | 896        |                 | < 2        | < 1             |                 |
| 1091          | 7/13/2011   | Pressure Tank In Basement                | Upland               |                                                      | < .005          | < .001        | 18            | 1.4              | 9.4            | < 3            | 230        |                 | < 4        | < .85           |                 |
| 1092          | 7/13/2011   | Well                                     | Valley               |                                                      | < .005          | < .001        | 11            | 0.3              | 6.7            | < 3            | 160        |                 | < 4        | < .85           |                 |
| 1093          | 7/13/2011   | Outside Hose Bib                         | Upland               | Yes                                                  | < .005          | < .001        | 4.7           | 0.097            | 10             | < 3            | 130        |                 | < 4        | 0.91            |                 |
| 1094          | 12/14/2009  | Pressure Tank In Basement                | Valley               | Yes                                                  |                 |               |               | 0.083            |                | < 1            | 168        |                 | 3.2        | 3               |                 |
| 1095          | 7/13/2011   | Well                                     | Valley               | Yes                                                  | < .005          | < .001        | 8.1           | 0.25             | 6.5            | < 3            | 130        |                 | < 4        | < .85           |                 |
| 1096          | 7/13/2011   | Pressure Tank                            | Valley               | Yes                                                  | < .005          | < .001        | 2.6           | 0.04             | 10             | < 3            | 100        |                 | < 4        | < .85           |                 |
| 1097          | 1/3/2010    | Spigot Under House                       | Upland               | Yes                                                  |                 |               |               | 0.335            |                | < 1            | 112        |                 | < 2        | < 1             |                 |
| 1098          | 12/17/2009  | Pressure Tank                            | Upland               |                                                      |                 |               |               | 1                |                | < 1            | 160        |                 | < 2        | < 1             |                 |

Table S.8. Groundwater Quality Data for 1701 "Pre-Drill" Water Well Samples from Susquehanna County, Pennsylvania

| Water Well ID | Sample Date | Sampling Port                            | Topographic Location | Gas Extraction Area (Within 1 km of Active Gas Well) | Selenium (mg/L) | Silver (mg/L) | Sodium (mg/L) | Strontium (mg/L) | Sulfate (mg/L) | Sulfide (mg/L) | TDS (mg/L) | Thallium (mg/L) | TSS (mg/L) | Turbidity (NTU) | Vanadium (mg/L) |
|---------------|-------------|------------------------------------------|----------------------|------------------------------------------------------|-----------------|---------------|---------------|------------------|----------------|----------------|------------|-----------------|------------|-----------------|-----------------|
| 1099          | 1/5/2010    | Kitchen Sink                             | Valley               | Yes                                                  |                 |               |               | 5.44             |                | < 1            | 676        |                 | < 2        | 1               |                 |
| 1100          | 7/18/2011   | Outside Faucet                           | Valley               | Yes                                                  | < .005          | < .001        | 3.2           | 0.045            | 13             | < 3            | 110        |                 | < 4        | < .85           |                 |
| 1101          | 12/13/2009  |                                          | Upland               |                                                      |                 |               |               | 0.762            |                | < 1            | 164        |                 | < 2        | < 1             |                 |
| 1102          | 7/19/2011   | Inside Faucet                            | Valley               | Yes                                                  | < .005          | < .001        | 12            | 0.35             | 13             | < 3            | 250        |                 | < 4        | < .85           |                 |
| 1103          | 7/20/2011   | Kitchen Sink Cold Water Tap              | Upland               |                                                      | < .005          | < .001        | 3.3           | 0.2              | 9              | < 3            | 77         |                 | < 4        | < .85           |                 |
| 1104          | 7/20/2011   | Pressure Tank                            | Upland               |                                                      | < .005          | < .001        | 7.4           | 0.92             | 12             | < 3            | 160        |                 | < 4        | < .85           |                 |
| 1105          | 12/28/2009  | Pressure Tank                            | Upland               |                                                      |                 |               |               | 2.41             |                | < 1            | 236        |                 | 19.6       | < 1             |                 |
| 1106          | 7/20/2011   | Frost Free Hydrant 2 Feet From Well Head | Upland               |                                                      | < .005          | < .001        | 13            | 0.46             | 12             | < 3            | 120        |                 | < 4        | < .85           |                 |
| 1107          | 7/20/2011   | Inside Faucet                            | Upland               |                                                      | < .005          | < .001        | 10            | 0.36             | 12             | < 3            | 390        |                 | < 4        | < .85           |                 |
| 1108          | 12/13/2009  | Pressure Tank                            | Upland               |                                                      |                 |               |               | 1.09             |                | < 1            | 156        |                 | < 2        | < 1             |                 |
| 1109          | 12/28/2009  | Pressure Tank                            | Upland               |                                                      |                 |               |               | < .025           |                | 12             | 224        |                 | < 2        | < 1             |                 |
| 1110          | 7/26/2011   | Pressure Tank In Gun Shop                | Valley               |                                                      | < .005          | < .001        | 69            | 0.51             | 2.6            | < 3            | 220        |                 | < 4        | < .85           |                 |
| 1111          | 12/16/2009  | Kitchen Sink                             | Valley               | Yes                                                  |                 |               |               | 0.036            |                | < 1            | 84         |                 | < 2        | < 1             |                 |
| 1112          | 7/26/2011   | Inside Faucet                            | Valley               |                                                      | < .005          | < .001        | 34            | 0.84             | 13             | < 3            | 200        |                 | < 4        | < .85           |                 |
| 1113          | 7/27/2011   | Outside Spigot Near Large Rock Slabs     | Valley               |                                                      | < .005          | < .001        | 44            | 0.79             | 7.4            | < 3            | 160        |                 | < 4        | < .85           |                 |
| 1114          | 12/13/2009  | Pressure Tank                            | Upland               | Yes                                                  |                 |               |               | 0.557            |                | < 1            | 124        |                 | < 2        | < 1             |                 |
| 1115          | 7/27/2011   | Outside Faucet                           | Upland               |                                                      | < .005          | < .001        | 6.3           | 0.17             | 13             | < 3            | 190        |                 | < 4        | 0.93            |                 |
| 1116          | 7/27/2011   | Kitchen Sink Cold Water Tap              | Valley               | Yes                                                  | < .005          | < .001        | 10            | 0.19             | 8.4            | < 3            | 180        |                 | < 4        | 1.8             |                 |
| 1117          | 1/11/2010   | Pressure Tank                            | Upland               |                                                      |                 |               |               | 1.45             |                | 3              | 116        |                 | < 2        | < 1             |                 |
| 1118          | 7/27/2011   | Kitchen Sink Faucet                      | Upland               |                                                      | < .005          | < .001        | 4.5           | 0.1              | 7.8            | < 3            | 140        |                 | < 4        | < .85           |                 |
| 1119          | 7/27/2011   | Outside Hose Bib                         | Upland               |                                                      | < .005          | < .001        | 8.4           | 0.42             | 8.4            | < 3            | 190        |                 | < 4        | < .85           |                 |
| 1120          | 7/28/2011   | Kitchen Sink                             | Valley               |                                                      | < .005          | < .001        | 14            | 0.13             | 12             | < 3            | 130        |                 | < 4        | < .85           |                 |

Table S.8. Groundwater Quality Data for 1701 "Pre-Drill" Water Well Samples from Susquehanna County, Pennsylvania

| Water Well ID | Sample Date | Sampling Port                  | Topographic Location | Gas Extraction Area (Within 1 km of Active Gas Well) | Selenium (mg/L) | Silver (mg/L) | Sodium (mg/L) | Strontium (mg/L) | Sulfate (mg/L) | Sulfide (mg/L) | TDS (mg/L) | Thallium (mg/L) | TSS (mg/L) | Turbidity (NTU) | Vanadium (mg/L) |
|---------------|-------------|--------------------------------|----------------------|------------------------------------------------------|-----------------|---------------|---------------|------------------|----------------|----------------|------------|-----------------|------------|-----------------|-----------------|
| 1121          | 7/28/2011   | Inside Faucet                  | Valley               |                                                      | < .005          | < .001        | 13            | 0.42             | 11             | < 3            | 140        |                 | < 4        | 1.8             |                 |
| 1122          | 7/28/2011   | Outside Faucet                 | Valley               |                                                      | < .005          | < .001        | 11            | 0.63             | 8.7            | < 3            | 120        |                 | < 4        | < .85           |                 |
| 1123          | 7/29/2011   | Pressure Tank                  | Upland               | Yes                                                  | < .005          | < .001        | 9.1           | 0.079            | 17             | < 3            | 150        |                 | < 4        | < .85           |                 |
| 1124          | 7/29/2011   | Kitchen Sink                   | Valley               |                                                      | < .005          | < .001        | 2.3           | 0.023            | 6.6            | < 3            | 66         |                 | < 4        | < .85           |                 |
| 1125          | 7/29/2011   | Pressure Tank                  | Valley               |                                                      | < .005          | < .001        | 3.8           | 0.16             | 15             | < 3            | 120        |                 | 6.4        | 18              |                 |
| 1126          | 8/1/2011    | Outside Faucet                 | Upland               |                                                      | < .005          | < .001        | 10            | 0.39             | 9.8            | < 3            | 110        |                 | < 4        | < .85           |                 |
| 1127          | 8/1/2011    | Outside Faucet                 | Valley               |                                                      | < .005          | < .001        | 1.5           | 0.034            | 5.8            | < 3            | 29         |                 | < 4        | 0.91            |                 |
| 1128          | 8/1/2011    | Pressure Tank At Basement      | Upland               | Yes                                                  | < .005          | < .001        | 9.6           | 0.32             | 12             | < 3            | 130        |                 | < 4        | < .85           |                 |
| 1129          | 8/2/2011    |                                | Upland               | Yes                                                  | <0.005          | <0.001        | 12            | 0.072            | 17             | <3             | 150        |                 | <4         | 8.6             |                 |
| 1130          | 12/28/2009  | Kitchen Sink                   | Valley               |                                                      |                 |               |               | 0.063            |                | < 1            | 88         |                 | < 2        | < 1             |                 |
| 1131          | 8/3/2011    | Kitchen Sink                   | Upland               | Yes                                                  | <.005           | < .001        | 17            | 0.18             | 19             | <3             | 200        |                 | <4         | <0.85           |                 |
| 1132          | 8/3/2011    | Pressure Tank                  | Valley               |                                                      | < .005          | < .001        | 17            | 0.39             | < 1            | < 3            | 110        |                 | < 4        | 6.6             |                 |
| 1133          | 10/22/2009  |                                | Upland               | Yes                                                  |                 |               |               | 0.319            |                | < 1            | 136        |                 |            |                 |                 |
| 1134          | 12/28/2009  | Garage Sink                    | Upland               |                                                      |                 |               |               | 0.747            |                | < 1            | 300        |                 | < 2        | < 1             |                 |
| 1135          | 8/4/2011    | Bathroom Sink Cwt On South End | Upland               |                                                      | < .005          | < .001        | 5.6           | 0.13             | 7.6            | < 3            | 120        |                 | 36         | 1.4             |                 |
| 1136          | 8/4/2011    | Bailed Well                    | Upland               | Yes                                                  | < .005          | < .001        | 2.7           | 0.043            | 15             | < 3            | 130        |                 | < 4        | < .85           |                 |
| 1137          | 8/4/2011    | Kitchen Sink                   | Upland               | Yes                                                  | < .005          | < .001        | 11            | 0.65             | 17             | < 3            | 170        |                 | < 4        | < .85           |                 |
| 1138          | 8/4/2011    | Pressure Tank                  | Valley               | Yes                                                  | < .005          | < .001        | 19            | 0.14             | 24             | < 3            | 270        |                 | < 4        | < .85           |                 |
| 1139          | 5/19/2011   |                                | Valley               |                                                      | <0.005          | <0.001        | 26            | 0.34             | 4              | <3             | 150        |                 | <4         | <0.85           |                 |
| 1140          | 7/25/2011   | Kitchen Sink                   | Valley               |                                                      | < .005          | < .001        | 29            | 0.52             | 14             | < 3            | 180        |                 | < 4        | < .85           |                 |
| 1141          | 7/27/2011   | Outside Spigot Under Back Deck | Valley               |                                                      | < .005          | < .001        | 12            | 0.45             | 7.6            | < 3            | 140        |                 | 5.2        | 16              |                 |
| 1142          | 8/2/2011    | Pressure Tank                  | Valley               |                                                      | < .005          | < .001        | 6.2           | 0.12             | 9.3            | < 3            | 140        |                 | < 4        | 1               |                 |

Table S.8. Groundwater Quality Data for 1701 "Pre-Drill" Water Well Samples from Susquehanna County, Pennsylvania

| Water Well ID | Sample Date | Sampling Port             | Topographic Location | Gas Extraction Area (Within 1 km of Active Gas Well) | Selenium (mg/L) | Silver (mg/L) | Sodium (mg/L) | Strontium (mg/L) | Sulfate (mg/L) | Sulfide (mg/L) | TDS (mg/L) | Thallium (mg/L) | TSS (mg/L) | Turbidity (NTU) | Vanadium (mg/L) |
|---------------|-------------|---------------------------|----------------------|------------------------------------------------------|-----------------|---------------|---------------|------------------|----------------|----------------|------------|-----------------|------------|-----------------|-----------------|
| 1143          | 8/2/2011    | Outside Faucet            | Upland               |                                                      | < .005          | < .001        | 4.1           | 0.051            | 8.5            | < 3            | 120        |                 | < 4        | < .85           |                 |
| 1144          | 1/3/2010    | Kitchen Sink              | Upland               | Yes                                                  |                 |               |               | 0.233            |                | < 1            | 140        |                 | < 2        | < 1             |                 |
| 1145          | 12/13/2009  |                           | Upland               | Yes                                                  |                 |               |               | 0.25             |                | < 1            | 172        |                 | < 2        | < 1             |                 |
| 1146          | 1/10/2010   | Spring House              | Upland               |                                                      |                 |               |               | 0.088            |                | < 1            | 304        |                 | < 2        | < 1             |                 |
| 1147          | 1/5/2010    | Pressure Tank             | Upland               |                                                      |                 |               |               | < .025           |                | < 1            | 60         |                 | < 2        | 1               |                 |
| 1148          | 5/10/2011   | Kitchen Sink              | Valley               |                                                      | < .005          | < .005        | 63.4          | 0.473            | 9              | < 1            | 240        |                 | < 2        | 1               |                 |
| 1149          | 2/1/2010    | Pressure Tank             | Upland               |                                                      |                 |               |               | 0.058            |                | < 1            | 104        |                 | < 2        | < 1             |                 |
| 1150          | 8/20/2009   |                           | Valley               |                                                      |                 |               |               | 0.366            |                | 4              | 706        |                 | 13.2       |                 |                 |
| 1151          | 12/6/2009   | Washroom Sink             | Valley               |                                                      |                 |               |               | 0.044            |                | < 1            | 76         |                 | < 2        | < 1             |                 |
| 1152          | 1/17/2010   | Kitchen Sink              | Valley               |                                                      |                 |               |               | 1.33             |                | < 1            | 216        |                 | < 2        | < 1             |                 |
| 1153          | 1/14/2010   | Basement At Pressure Tank | Upland               |                                                      |                 |               |               | 0.33             |                | < 1            | 152        |                 | 2.4        | < 1             |                 |
| 1154          | 1/17/2010   | Kitchen Sink              | Upland               |                                                      |                 |               |               | 0.335            |                | < 1            | 172        |                 | < 2        | < 1             |                 |
| 1155          | 1/17/2010   | Pressure Tank             | Valley               |                                                      |                 |               |               | 0.035            |                | < 1            | 60         |                 | < 2        | < 1             |                 |
| 1156          | 12/11/2010  | Kitchen Sink              | Valley               |                                                      | <0.002          | <0.001        | 21            | 39               | 8              | <1             | 40         |                 | <2         | 1               |                 |
| 1157          | 8/4/2011    | Spigot Back Yard          | Upland               |                                                      |                 |               |               |                  |                |                |            |                 |            |                 |                 |
| 1158          | 8/4/2011    | Kitchen Sink              | Valley               |                                                      |                 |               |               |                  |                |                |            |                 |            |                 |                 |
| 1159          | 8/4/2011    | Pressure Tank             | Valley               |                                                      |                 |               |               |                  |                |                |            |                 |            |                 |                 |
| 1160          | 8/10/2011   |                           | Upland               |                                                      | < .002          | < .001        | 53            | 3.2              | < 5            | < 1            | 332        |                 | < 2        | < 1             |                 |
| 1161          | 8/10/2011   | Kitchen Sink              | Valley               |                                                      |                 |               |               |                  |                |                |            |                 |            |                 |                 |
| 1162          | 8/10/2011   | Kitchen Sink              | Upland               |                                                      |                 |               |               |                  |                |                |            |                 |            |                 |                 |
| 1163          | 8/10/2011   | Spigot On Side Of House   | Upland               |                                                      |                 |               |               |                  |                |                |            |                 |            |                 |                 |
| 1164          | 8/10/2011   | Outside Spigot            | Valley               |                                                      |                 |               |               |                  |                |                |            |                 |            |                 |                 |
| 1165          | 8/10/2011   | Kitchen Sink              | Valley               |                                                      |                 |               |               |                  |                |                |            |                 |            |                 |                 |

Table S.8. Groundwater Quality Data for 1701 "Pre-Drill" Water Well Samples from Susquehanna County, Pennsylvania

| Water Well ID | Sample Date | Sampling Port             | Topographic Location | Gas Extraction Area (Within 1 km of Active Gas Well) | Selenium (mg/L) | Silver (mg/L) | Sodium (mg/L) | Strontium (mg/L) | Sulfate (mg/L) | Sulfide (mg/L) | TDS (mg/L) | Thallium (mg/L) | TSS (mg/L) | Turbidity (NTU) | Vanadium (mg/L) |
|---------------|-------------|---------------------------|----------------------|------------------------------------------------------|-----------------|---------------|---------------|------------------|----------------|----------------|------------|-----------------|------------|-----------------|-----------------|
| 1166          | 8/10/2011   | Spigot On Side Of Shed    | Valley               |                                                      |                 |               |               |                  |                |                |            |                 |            |                 |                 |
| 1167          | 8/10/2011   | Outside Spigot            | Upland               |                                                      |                 |               |               |                  |                |                |            |                 |            |                 |                 |
| 1168          | 8/10/2011   | Kitchen Sink              | Upland               |                                                      |                 |               |               |                  |                |                |            |                 |            |                 |                 |
| 1169          | 8/10/2011   | Outside Spigot            | Upland               |                                                      |                 |               |               |                  |                |                |            |                 |            |                 |                 |
| 1170          | 8/10/2011   | Kitchen Sink              | Upland               |                                                      |                 |               |               |                  |                |                |            |                 |            |                 |                 |
| 1171          | 8/10/2011   | Dug Well                  | Upland               |                                                      |                 |               |               |                  |                |                |            |                 |            |                 |                 |
| 1172          | 8/10/2011   | Shop Sink                 | Upland               |                                                      |                 |               |               |                  |                |                |            |                 |            |                 |                 |
| 1173          | 12/10/2009  | Kitchen Sink              | Valley               | Yes                                                  |                 |               |               | 0.804            |                | 4              | 192        |                 | < 2        | 3               |                 |
| 1174          | 8/11/2011   | Kitchen Sink              | Upland               |                                                      |                 |               |               |                  |                |                |            |                 |            |                 |                 |
| 1175          | 8/11/2011   | Kitchen Sink              | Upland               |                                                      |                 |               |               |                  |                |                |            |                 |            |                 |                 |
| 1176          | 8/11/2011   | Outside Spigot            | Valley               |                                                      |                 |               |               |                  |                |                |            |                 |            |                 |                 |
| 1177          | 8/11/2011   | Kitchen Sink              | Upland               |                                                      |                 |               |               |                  |                |                |            |                 |            |                 |                 |
| 1178          | 8/14/2011   | Outside Spigot            | Valley               |                                                      |                 |               |               |                  |                |                |            |                 |            |                 |                 |
| 1179          | 8/15/2011   | Hand Dug Well             | Upland               |                                                      |                 |               |               |                  |                |                |            |                 |            |                 |                 |
| 1180          | 8/16/2011   | Kitchen Sink              | Upland               |                                                      |                 |               |               |                  |                |                |            |                 |            |                 |                 |
| 1181          | 1/14/2010   | Basement Pressure Tank    | Valley               |                                                      |                 |               |               | < .025           |                | < 1            | 24         |                 | < 2        | < 1             |                 |
| 1182          | 8/16/2011   | Dug Well                  | Upland               |                                                      |                 |               |               |                  |                |                |            |                 |            |                 |                 |
| 1183          | 8/16/2011   | Kitchen Sink              | Valley               |                                                      |                 |               |               |                  |                |                |            |                 |            |                 |                 |
| 1184          | 2/1/2010    | Elementary Boiler Room    | Upland               | Yes                                                  |                 |               |               | 0.36             |                | < 1            | 192        |                 | < 2        | < 1             |                 |
| 1185          | 8/17/2011   | Kitchen Sink              | Valley               |                                                      |                 |               |               |                  |                |                |            |                 |            |                 |                 |
| 1186          | 8/19/2011   | Kitchen Sink              | Upland               |                                                      |                 |               |               |                  |                |                |            |                 |            |                 |                 |
| 1187          | 8/19/2011   | Kitchen Sink              | Valley               |                                                      |                 |               |               |                  |                |                |            |                 |            |                 |                 |
| 1188          | 8/29/2011   | Outside Faucet            | Valley               |                                                      | < .005          | < .001        | 7.9           | 0.26             | 9.94           | < .1           | 138        |                 | < 1        | < 1             |                 |
| 1189          | 1/14/2010   | Basement At Pressure Tank | Valley               |                                                      |                 |               |               | 0.717            |                | < 1            | 148        |                 | 2          | 1               |                 |
| 1190          | 9/1/2011    | Outside Faucet            | Upland               |                                                      |                 |               |               |                  |                |                |            |                 |            |                 |                 |
| 1191          | 9/1/2011    | Hydrant                   | Upland               |                                                      |                 |               |               |                  |                |                |            |                 |            |                 |                 |



Table S.8. Groundwater Quality Data for 1701 "Pre-Drill" Water Well Samples from Susquehanna County, Pennsylvania

| Water Well ID | Sample Date | Sampling Port             | Topographic Location | Gas Extraction Area (Within 1 km of Active Gas Well) | Selenium (mg/L) | Silver (mg/L) | Sodium (mg/L) | Strontium (mg/L) | Sulfate (mg/L) | Sulfide (mg/L) | TDS (mg/L) | Thallium (mg/L) | TSS (mg/L) | Turbidity (NTU) | Vanadium (mg/L) |
|---------------|-------------|---------------------------|----------------------|------------------------------------------------------|-----------------|---------------|---------------|------------------|----------------|----------------|------------|-----------------|------------|-----------------|-----------------|
| 1192          | 8/2/2011    | Pressure Tank             | Upland               | Yes                                                  | < .005          | < .001        | 90            | 0.035            | 11             | < 3            | 240        |                 | < 4        | 3.4             |                 |
| 1193          | 1/17/2010   | Garage Sink               | Upland               |                                                      |                 |               |               | 0.668            |                | < 1            | 180        |                 | < 2        | < 1             |                 |
| 1194          | 8/10/2011   | Outside Faucet            | Valley               | Yes                                                  | < .005          | < .001        | 11            | 0.7              | 8.3            | < 3            | 170        |                 | 26         | 14              |                 |
| 1195          | 8/10/2011   | Inside Faucet             | Upland               | Yes                                                  | < .005          | < .001        | 22            | 3                | 3.6            | < 3            | 150        |                 | < 4        | < .85           |                 |
| 1196          | 1/13/2010   | Kitchen Sink              | Upland               |                                                      |                 |               |               | 0.03             |                | < 1            | 180        |                 | < 2        | < 1             |                 |
| 1197          | 2/3/2010    | Sink In Milkhouse Barn    | Upland               | Yes                                                  |                 |               |               | 0.285            |                | < 1            | 188        |                 | 2          | < 1             |                 |
| 1198          | 8/15/2011   | Outside Faucet            | Upland               | Yes                                                  | < .005          | < .001        | 8.9           | 0.41             | 12             | < 3            | 150        |                 | < 4        | < .85           |                 |
| 1199          | 1/12/2010   | Pressure Tank             | Upland               |                                                      |                 |               |               | 0.084            |                | < 1            | 100        |                 | < 2        | 1               |                 |
| 1200          | 1/18/2010   | Kitchen Sink              | Upland               |                                                      |                 |               |               | 0.038            |                | < 1            | 80         |                 | < 2        | < 1             |                 |
| 1201          | 8/22/2011   | Barn Spigot               | Upland               |                                                      |                 |               |               |                  |                |                |            |                 |            |                 |                 |
| 1202          | 8/22/2011   | Kitchen Sink              | Valley               |                                                      |                 |               |               |                  |                |                |            |                 |            |                 |                 |
| 1203          | 8/22/2011   | Kitchen Sink              | Upland               |                                                      |                 |               |               |                  |                |                |            |                 |            |                 |                 |
| 1204          | 8/22/2011   | Kitchen Sink              | Valley               |                                                      |                 |               |               |                  |                |                |            |                 |            |                 |                 |
| 1205          | 8/22/2011   | Kitchen Sink              | Upland               |                                                      |                 |               |               |                  |                |                |            |                 |            |                 |                 |
| 1206          | 8/23/2011   | Outside Spigot            | Valley               |                                                      |                 |               |               |                  |                |                |            |                 |            |                 |                 |
| 1207          | 1/23/2010   | Basement At Pressure Tank | Upland               |                                                      |                 |               |               | 0.515            |                | < 1            | 140        |                 | < 2        | < 1             |                 |
| 1208          | 1/13/2010   |                           | Valley               |                                                      |                 |               |               | 1                |                | < 1            | 1044       |                 | < 2        | < 1             |                 |
| 1209          | 6/23/2011   | Kitchen Sink              | Valley               | Yes                                                  | < .005          | < .001        | 17            | 0.43             | 13             | < 3            | 150        |                 | < 4        | < .85           |                 |
| 1210          | 1/13/2010   | Kitchen Sink              | Upland               |                                                      |                 |               |               | 0.562            |                | < 1            | 132        |                 | < 2        | < 1             |                 |
| 1211          | 8/5/2011    | Inside Faucet             | Upland               | Yes                                                  | < .005          | < .001        | 9.8           | 0.45             | 7.6            | < 3            | 20         |                 | < 4        | < .85           |                 |
| 1212          | 8/12/2011   | Pressure Tank             | Valley               |                                                      | <0.005          | <0.001        | 10            | 0.45             | 11             | <3             | 180        |                 | <4         | <0.85           |                 |
| 1213          | 12/6/2009   | Kitchen Sink              | Upland               |                                                      |                 |               |               | 0.287            |                | < 1            | 210        |                 | < 2        | < 1             |                 |
| 1214          | 8/12/2011   | Inside Faucet             | Upland               |                                                      | < .005          | < .001        | 4             | 0.16             | 12             | < 3            | 150        |                 | < 4        | 0.96            |                 |
| 1215          | 8/21/2011   | Outside Faucet            | Upland               |                                                      | < .005          | < .001        | 13            | 1.2              | 12             | < 3            | 160        |                 | 29         | 82              |                 |
| 1216          | 8/23/2011   | Inside Faucet             | Upland               |                                                      | < .005          | < .001        | 19            | 1                | 14             | < 3            | 190        |                 | < 4        | < .85           |                 |

Table S.8. Groundwater Quality Data for 1701 "Pre-Drill" Water Well Samples from Susquehanna County, Pennsylvania

| Water Well ID | Sample Date | Sampling Port                  | Topographic Location | Gas Extraction Area (Within 1 km of Active Gas Well) | Selenium (mg/L) | Silver (mg/L) | Sodium (mg/L) | Strontium (mg/L) | Sulfate (mg/L) | Sulfide (mg/L) | TDS (mg/L) | Thallium (mg/L) | TSS (mg/L) | Turbidity (NTU) | Vanadium (mg/L) |
|---------------|-------------|--------------------------------|----------------------|------------------------------------------------------|-----------------|---------------|---------------|------------------|----------------|----------------|------------|-----------------|------------|-----------------|-----------------|
| 1217          | 8/23/2011   | Inside Faucet                  | Upland               | Yes                                                  | < .005          | < .001        | 20            | 1.2              | 9.9            | < 3            | 140        |                 | < 4        | < .85           |                 |
| 1218          | 8/24/2011   | Pressure Tank                  | Upland               | Yes                                                  | < .005          | < .001        | 19            | 0.11             | 15             | < 3            | 98         |                 | 28         | 10              |                 |
| 1219          | 8/24/2011   | Inside Faucet                  | Valley               |                                                      | < .005          | < .001        | 7.7           | 0.24             | 6.8            | < 3            | 120        |                 | < 4        | 2.5             |                 |
| 1220          | 1/18/2010   | Basement Pressure Tank         | Upland               |                                                      |                 |               |               | 0.465            |                | < 1            | 252        |                 | < 2        | < 1             |                 |
| 1221          | 8/25/2011   | Inside Faucet                  | Upland               |                                                      | < .005          | < .001        | 6.4           | 0.4              | 8.4            | < 3            | 170        |                 | < 4        | 0.99            |                 |
| 1222          | 8/26/2011   | Well                           | Upland               | Yes                                                  | < .005          | < .001        | 5.6           | 0.067            | 1.7            | < 3            | 120        |                 | 69         | 45              |                 |
| 1223          | 8/29/2011   | Kitchen Sink                   | Upland               |                                                      | < .005          | < .001        | 12            | 0.61             | 7.8            | < 3            | 130        |                 | < 4        | < .85           |                 |
| 1224          | 1/11/2010   | Kitchen Sink                   | Upland               |                                                      |                 |               |               | 0.641            |                | < 1            | 140        |                 | < 2        | 2               |                 |
| 1225          | 1/18/2010   | Pressure Tank In Basement      | Valley               | Yes                                                  |                 |               |               | 0.684            |                | 3              | 136        |                 | < 2        | < 1             |                 |
| 1226          | 1/24/2010   | Pressure Tank                  | Upland               | Yes                                                  |                 |               |               | 0.76             |                | 3              | 152        |                 | < 2        | < 1             |                 |
| 1227          | 8/30/2011   | Pressure Tank                  | Upland               |                                                      | < .005          | < .001        | 9.6           | 0.27             | 9.3            | < 3            | 150        |                 | < 4        | 8               |                 |
| 1228          | 8/30/2011   | Outside Hose Bib               | Valley               |                                                      | < .005          | < .001        | 14            | 0.66             | 9.1            | < 3            | 170        |                 | < 4        | < .85           |                 |
| 1229          | 8/10/2011   | Pressure Tank Before Treatment | Valley               |                                                      | < .005          | < .001        | 85            | 0.56             | 2.6            | < 3            | 260        |                 | < 4        | 1.1             |                 |
| 1230          | 1/10/2010   | Little House By Pond Spring    | Valley               |                                                      |                 |               |               | 0.046            |                | < 1            | 156        |                 | < 2        | < 1             |                 |
| 1231          | 1/10/2010   | Pressure Tank                  | Valley               |                                                      |                 |               |               | 0.806            |                | 3              | 164        |                 | 2          | < 1             |                 |
| 1232          | 1/16/2010   | Basement Pressure Tank         | Upland               |                                                      |                 |               |               | 0.957            |                | < 1            | 136        |                 | < 2        | < 1             |                 |
| 1233          | 7/19/2011   | Kitchen Sink                   | Upland               |                                                      |                 |               |               |                  |                |                |            |                 |            |                 |                 |
| 1234          | 8/24/2011   | Kitchen Sink                   | Valley               |                                                      |                 |               |               |                  |                |                |            |                 |            |                 |                 |
| 1235          | 8/24/2011   | Inside Faucet                  | Valley               |                                                      |                 |               |               |                  |                |                |            |                 |            |                 |                 |
| 1236          | 1/16/2010   | Basement At Pressure Tank      | Upland               |                                                      |                 |               |               | 0.086            |                | < 1            | 108        |                 | < 2        | < 1             |                 |
| 1237          | 1/16/2010   | Basement Pressure Tank         | Upland               |                                                      |                 |               |               | 0.452            |                | < 1            | 128        |                 | < 2        | < 1             |                 |

Table S.8. Groundwater Quality Data for 1701 "Pre-Drill" Water Well Samples from Susquehanna County, Pennsylvania

| Water Well ID | Sample Date | Sampling Port                | Topographic Location | Gas Extraction Area (Within 1 km of Active Gas Well) | Selenium (mg/L) | Silver (mg/L) | Sodium (mg/L) | Strontium (mg/L) | Sulfate (mg/L) | Sulfide (mg/L) | TDS (mg/L) | Thallium (mg/L) | TSS (mg/L) | Turbidity (NTU) | Vanadium (mg/L) |
|---------------|-------------|------------------------------|----------------------|------------------------------------------------------|-----------------|---------------|---------------|------------------|----------------|----------------|------------|-----------------|------------|-----------------|-----------------|
| 1238          | 8/26/2011   | Kitchen Sink                 | Valley               |                                                      |                 |               |               |                  |                |                |            |                 |            |                 |                 |
| 1239          | 8/27/2011   | Kitchen Sink                 | Upland               |                                                      |                 |               |               |                  |                |                |            |                 |            |                 |                 |
| 1240          | 8/27/2011   | Kitchen Sink                 | Valley               |                                                      |                 |               |               |                  |                |                |            |                 |            |                 |                 |
| 1241          | 1/21/2010   | Kitchen Sink                 | Upland               |                                                      |                 |               |               | 0.367            |                | < 1            | 144        |                 | < 2        | < 1             |                 |
| 1242          | 8/27/2011   | Kitchen Faucet               | Valley               |                                                      |                 |               |               |                  |                |                |            |                 |            |                 |                 |
| 1243          | 1/23/2010   | Pressre Tank In Barn         | Upland               | Yes                                                  |                 |               |               | 0.455            |                | < 1            | 216        |                 | < 2        | < 1             |                 |
| 1244          | 9/1/2011    | Kitchen Sink                 | Valley               |                                                      |                 |               |               |                  |                |                |            |                 |            |                 |                 |
| 1245          | 1/23/2010   | Basement At Pressure Tank    | Upland               | Yes                                                  |                 |               |               | 0.22             |                | < 1            | 300        |                 | < 2        | < 1             |                 |
| 1246          | 9/1/2011    | Well In Field                | Upland               |                                                      |                 |               |               |                  |                |                |            |                 |            |                 |                 |
| 1247          | 8/10/2011   | Kitchen Sink                 | Upland               |                                                      |                 |               |               |                  |                |                |            |                 |            |                 |                 |
| 1248          | 8/10/2011   | Kitchen Sink                 | Upland               |                                                      |                 |               |               |                  |                |                |            |                 |            |                 |                 |
| 1249          | 8/11/2011   | Pressure Tank                | Valley               |                                                      |                 |               |               |                  |                |                |            |                 |            |                 |                 |
| 1250          | 1/14/2010   | Basement At Pressure Tank    | Upland               |                                                      |                 |               |               | 0.213            |                | < 1            | 208        |                 | < 2        | < 1             |                 |
| 1251          | 2/3/2010    | Holding Tank                 | Upland               |                                                      |                 |               |               | 0.028            |                | < 1            | 64         |                 | < 2        | < 1             |                 |
| 1252          | 8/18/2011   | Kitchen Sink                 | Valley               | Yes                                                  | < .005          | < .001        | 12            | 0.42             | 17             | < 3            | 150        |                 | < 4        | < .85           |                 |
| 1253          | 1/31/2010   | Basement At Pressure Tank    | Upland               |                                                      |                 |               |               | 0.063            |                | < 1            | 96         |                 | < 2        | < 1             |                 |
| 1254          | 1/24/2010   | Kitchen Sink                 | Upland               |                                                      |                 |               |               | 0.29             |                | < 1            | 172        |                 | < 2        | < 1             |                 |
| 1255          | 1/21/2010   | Pressure Tank                | Valley               | Yes                                                  |                 |               |               | 0.5              |                | 4              | 124        |                 | < 2        | < 1             |                 |
| 1256          | 2/12/2009   |                              | Upland               | Yes                                                  |                 |               |               | 0.072            |                | <1             | 148        |                 | <2         |                 |                 |
| 1257          | 4/8/2009    |                              | Upland               |                                                      |                 |               |               | 0.322            |                | <1             | 88         |                 | <2         |                 |                 |
| 1258          | 1/16/2010   | Basement Pressure Tank       | Upland               | Yes                                                  |                 |               |               | 0.271            |                | < 1            | 148        |                 | < 2        | < 1             |                 |
| 1259          | 1/24/2010   | Pressure Tank - Drilled Well | Valley               | Yes                                                  |                 |               |               | 0.078            |                | < 1            | 136        |                 | < 2        | < 1             |                 |
| 1260          | 1/31/2010   | Crawl Space At Pressure Tank | Valley               |                                                      |                 |               |               | 0.67             |                | < 1            | 192        |                 | < 2        | < 1             |                 |
| 1261          | 1/31/2010   | Pressure Tank                | Valley               |                                                      |                 |               |               | < .025           |                | < 1            | 64         |                 | < 2        | 2               |                 |

Table S.8. Groundwater Quality Data for 1701 "Pre-Drill" Water Well Samples from Susquehanna County, Pennsylvania

| Water Well ID | Sample Date | Sampling Port                     | Topographic Location | Gas Extraction Area (Within 1 km of Active Gas Well) | Selenium (mg/L) | Silver (mg/L) | Sodium (mg/L) | Strontium (mg/L) | Sulfate (mg/L) | Sulfide (mg/L) | TDS (mg/L) | Thallium (mg/L) | TSS (mg/L) | Turbidity (NTU) | Vanadium (mg/L) |
|---------------|-------------|-----------------------------------|----------------------|------------------------------------------------------|-----------------|---------------|---------------|------------------|----------------|----------------|------------|-----------------|------------|-----------------|-----------------|
| 1262          | 1/24/2010   | Outside Spigot                    | Upland               |                                                      |                 |               |               | 0.314            |                | < 1            | 152        |                 | < 2        | < 1             |                 |
| 1263          | 1/24/2010   | Kitchen Sink                      | Upland               |                                                      |                 |               |               | 0.314            |                | < 1            | 152        |                 | < 2        | < 1             |                 |
| 1264          | 1/23/2010   | Pressure Tank In Basement         | Valley               | Yes                                                  |                 |               |               | < .025           |                | < 1            | 40         |                 | < 2        | < 1             |                 |
| 1265          | 1/18/2010   | Basement Pressure Tank            | Upland               |                                                      |                 |               |               | 0.759            |                | < 1            | 124        |                 | < 2        | < 1             |                 |
| 1266          | 1/10/2010   | Basement Pressure Tank            | Upland               |                                                      |                 |               |               | < .025           |                | < 1            | 236        |                 | < 2        | 1               |                 |
| 1267          | 1/11/2010   | Pressure Tank                     | Upland               |                                                      |                 |               |               | 0.18             |                | < 1            | 92         |                 | < 2        | < 1             |                 |
| 1268          | 12/9/2009   | Basement At Pressure Tank         | Upland               | Yes                                                  |                 |               |               | 1.41             |                | < 1            | 176        |                 | < 2        | 3               |                 |
| 1269          | 1/18/2010   | Pressure Tank                     | Upland               |                                                      |                 |               |               | 0.393            |                | < 1            | 160        |                 | < 2        | < 1             |                 |
| 1270          | 1/31/2010   |                                   | Upland               | Yes                                                  |                 |               |               | 0.292            |                | < 1            | 192        |                 | < 2        | < 1             |                 |
| 1271          | 8/7/2009    | Kitchen Sink                      | Valley               |                                                      |                 |               |               | 0.035            |                | < 1            | 73         |                 | < 2        |                 |                 |
| 1272          | 1/12/2010   | Kitchen Sink At Ashley Sarnosky'S | Upland               |                                                      |                 |               |               | 0.036            |                | < 1            | 56         |                 | < 2        | < 1             |                 |
| 1273          | 2/21/2010   | Kitchen Sink                      | Upland               |                                                      |                 |               |               | 0.504            |                | < 1            | 128        |                 | < 2        | < 1             |                 |
| 1274          | 8/6/2009    |                                   | Upland               | Yes                                                  |                 |               |               | 1.01             |                | < 1            | 240        |                 | < 2        |                 |                 |
| 1275          | 2/15/2010   | Pressure Tank                     | Upland               |                                                      |                 |               |               | 0.562            |                | < 1            | 200        |                 | < 2        | 1               |                 |
| 1276          | 2/13/2010   | Basement At Pressure Tank         | Valley               |                                                      |                 |               |               | 0.098            |                | < 1            | 224        |                 | < 2        | < 1             |                 |
| 1277          | 2/27/2010   | Basement At Spigot                | Valley               |                                                      |                 |               |               | 0.096            |                | < 1            | 124        |                 | < 2        | < 1             |                 |
| 1278          | 2/18/2010   | Pressure Tank                     | Upland               | Yes                                                  |                 |               |               | 0.385            |                | < 1            | 160        |                 | < 2        | < 1             |                 |
| 1279          | 2/16/2010   | Kitchen Sink                      | Upland               |                                                      |                 |               |               | 1.28             |                | < 1            | 124        |                 | < 2        | < 1             |                 |
| 1280          | 2/18/2010   | Kitchen Sink                      | Upland               | Yes                                                  |                 |               |               | 0.279            |                | < 1            | 180        |                 | < 2        | < 1             |                 |
| 1281          | 2/18/2010   | Kitchen Sink                      | Upland               |                                                      |                 |               |               | 0.456            |                | < 1            | 168        |                 | < 2        | < 1             |                 |
| 1282          | 2/18/2010   | Kitchen Sink                      | Upland               |                                                      |                 |               |               | 0.221            |                | < 1            | 164        |                 | < 2        | < 1             |                 |

Table S.8. Groundwater Quality Data for 1701 "Pre-Drill" Water Well Samples from Susquehanna County, Pennsylvania

| Water Well ID | Sample Date | Sampling Port                          | Topographic Location | Gas Extraction Area (Within 1 km of Active Gas Well) | Selenium (mg/L) | Silver (mg/L) | Sodium (mg/L) | Strontium (mg/L) | Sulfate (mg/L) | Sulfide (mg/L) | TDS (mg/L) | Thallium (mg/L) | TSS (mg/L) | Turbidity (NTU) | Vanadium (mg/L) |
|---------------|-------------|----------------------------------------|----------------------|------------------------------------------------------|-----------------|---------------|---------------|------------------|----------------|----------------|------------|-----------------|------------|-----------------|-----------------|
| 1283          | 2/22/2010   | Rental House Basement At Pressure Tank | Upland               |                                                      |                 |               |               | 0.167            |                | < 1            | 148        |                 | < 2        | < 1             |                 |
| 1284          | 2/16/2010   | Kitchen Sink                           | Upland               |                                                      |                 |               |               | 0.226            |                | < 1            | 152        |                 | < 2        | < 1             |                 |
| 1285          | 2/21/2010   | Kitchen Sink                           | Upland               |                                                      |                 |               |               | 0.788            |                | < 1            | 196        |                 | < 2        | < 1             |                 |
| 1286          | 2/18/2010   | Pressure Tank                          | Valley               |                                                      |                 |               |               | 0.154            |                | < 20           | 162        |                 | 114        | 65              |                 |
| 1287          | 2/6/2010    | Basement At Pressure Tank              | Valley               |                                                      |                 |               |               | 0.061            |                | < 1            | 136        |                 | < 2        | < 1             |                 |
| 1288          | 2/13/2010   | Pressure Tank                          | Upland               |                                                      |                 |               |               | 0.194            |                | < 1            | 220        |                 | < 2        | < 1             |                 |
| 1289          | 2/1/2010    | Basement Sink                          | Valley               | Yes                                                  |                 |               |               | 0.992            |                | < 1            | 144        |                 | < 2        | < 1             |                 |
| 1290          | 2/21/2010   | Pressure Tank                          | Upland               |                                                      |                 |               |               | 0.048            |                | < 1            | 140        |                 | < 2        | < 1             |                 |
| 1291          | 2/21/2010   | Barn Well                              | Upland               |                                                      |                 |               |               | 0.078            |                | < 1            | 436        |                 | 2          | 1               |                 |
| 1292          | 2/16/2010   | Kitchen Sink                           | Upland               |                                                      |                 |               |               | 0.256            |                | < 1            | 108        |                 | < 2        | < 1             |                 |
| 1293          | 2/22/2010   | Hand Dug Well                          | Upland               |                                                      |                 |               |               | 0.037            |                | < 1            | 128        |                 | < 2        | < 1             |                 |
| 1294          | 2/16/2010   | Bathroom Sink                          | Upland               | Yes                                                  |                 |               |               | 0.202            |                | < 1            | 128        |                 | < 2        | < 1             |                 |
| 1295          | 2/16/2010   | Pressure Tank                          | Upland               |                                                      |                 |               |               | 0.129            |                | < 1            | 152        |                 | < 2        | < 1             |                 |
| 1296          | 2/7/2010    | Main House Pressure Tank               | Valley               |                                                      |                 |               |               | 0.122            |                | < 1            | 156        |                 | < 2        | 1               |                 |
| 1297          | 2/7/2010    | Rental Property Pressure Tank          | Upland               |                                                      |                 |               |               | 0.093            |                | < 1            | 368        |                 | < 2        | < 1             |                 |
| 1298          | 2/13/2010   | Kitchen Sink                           | Upland               |                                                      |                 |               |               | 1.08             |                | < 1            | 168        |                 | < 2        | < 1             |                 |
| 1299          | 2/13/2010   | Well House                             | Upland               |                                                      |                 |               |               | 0.091            |                | < 1            | 296        |                 | < 2        | < 1             |                 |
| 1300          | 8/6/2009    |                                        | Valley               |                                                      |                 |               |               | 0.031            |                | < 1            | 96         |                 | 7.6        |                 |                 |
| 1301          | 2/7/2010    | Barn - Pump                            | Upland               |                                                      |                 |               |               | 0.055            |                | < 1            | 136        |                 | < 2        | < 1             |                 |
| 1302          | 2/7/2010    | Pressure Tank                          | Upland               |                                                      |                 |               |               | 0.106            |                | < 1            | 120        |                 | < 2        | < 1             |                 |
| 1303          | 2/7/2010    | Pressure Tank                          | Upland               |                                                      |                 |               |               | 0.403            |                | < 1            | 76         |                 | < 2        | < 1             |                 |
| 1304          | 2/6/2010    | Pressure Tank                          | Valley               |                                                      |                 |               |               | 0.452            |                | < 1            | 332        |                 | 4.4        | 8               |                 |
| 1305          | 2/6/2010    | Basement At Pressure Tank              | Valley               |                                                      |                 |               |               | 0.167            |                | < 1            | 188        |                 | < 2        | < 1             |                 |

Table S.8. Groundwater Quality Data for 1701 "Pre-Drill" Water Well Samples from Susquehanna County, Pennsylvania

| Water Well ID | Sample Date | Sampling Port                  | Topographic Location | Gas Extraction Area (Within 1 km of Active Gas Well) | Selenium (mg/L) | Silver (mg/L) | Sodium (mg/L) | Strontium (mg/L) | Sulfate (mg/L) | Sulfide (mg/L) | TDS (mg/L) | Thallium (mg/L) | TSS (mg/L) | Turbidity (NTU) | Vanadium (mg/L) |
|---------------|-------------|--------------------------------|----------------------|------------------------------------------------------|-----------------|---------------|---------------|------------------|----------------|----------------|------------|-----------------|------------|-----------------|-----------------|
| 1306          | 2/6/2010    | Pressure Tank                  | Valley               |                                                      |                 |               |               | 0.157            |                | < 1            | 104        |                 | < 2        | < 1             |                 |
| 1307          | 2/15/2010   | Outside Hydrant                | Upland               | Yes                                                  |                 |               |               | 0.258            |                | < 1            | 148        |                 | < 2        | < 1             |                 |
| 1308          | 2/27/2010   | Hand Dug Well 1 Back Of House  | Valley               |                                                      |                 |               |               | 0.046            |                | < 1            | 132        |                 | < 2        | < 1             |                 |
| 1309          | 2/27/2010   | Hand Dug Well 2 Front Of House | Valley               |                                                      |                 |               |               | 0.053            |                | < 5            | 140        |                 | < 2        | < 1             |                 |
| 1310          | 2/7/2010    | Outside Faucet                 | Valley               |                                                      |                 |               |               | 2.05             |                | 4              | 184        |                 | 2.4        | 7               |                 |
| 1311          | 2/6/2010    | Basement At Pressure Tank      | Valley               |                                                      |                 |               |               | 0.118            |                | < 1            | 136        |                 | < 2        | < 1             |                 |
| 1312          | 2/21/2010   | Kitchen Sink                   | Valley               |                                                      |                 |               |               | 0.639            |                | < 1            | 132        |                 | < 2        | < 1             |                 |
| 1313          | 8/6/2009    |                                | Valley               |                                                      |                 |               |               | 0.306            |                | < 1            | 212        |                 | < 2        |                 |                 |
| 1314          | 2/22/2010   | Milkhouse Sink                 | Upland               |                                                      |                 |               |               | 0.181            |                | < 1            | 180        |                 | < 2        | < 1             |                 |
| 1315          | 2/28/2010   | Pressure Tank                  | Valley               | Yes                                                  |                 |               |               | 0.279            |                | < 1            | 172        |                 | < 2        | 1               |                 |
| 1316          | 2/13/2010   | Basement Men'S Room Sink       | Upland               |                                                      |                 |               |               | 0.385            |                | < 1            | 792        |                 | 2          | 1               |                 |
| 1317          | 2/28/2010   | Outside Spigot                 | Valley               |                                                      |                 |               |               | 0.313            |                | < 1            | 108        |                 | < 2        | 1               |                 |
| 1318          | 2/28/2010   | Kitchen Sink                   | Upland               |                                                      |                 |               |               | 0.255            |                | < 1            | 156        |                 | < 2        | < 1             |                 |
| 1319          | 2/27/2010   | Basement Pressure Tank         | Valley               |                                                      |                 |               |               | 0.084            |                | < 5            | 252        |                 | 3.6        | 10              |                 |
| 1320          | 3/16/2010   | Kitchen Sink                   | Valley               | Yes                                                  |                 |               |               | < .025           |                | < 1            | 68         |                 | < 2        | < 1             |                 |
| 1321          | 3/11/2010   | Kitchen Sink                   | Upland               | Yes                                                  |                 |               |               | 0.093            |                | < 1            | 110        |                 | < 2        | < 1             |                 |
| 1322          | 3/18/2010   | Kitchen Sink                   | Upland               |                                                      |                 |               |               | 0.198            |                | < 1            | 428        | < .002          | 4          |                 | < .01           |
| 1323          | 8/11/2011   | Kitchen Sink                   | Upland               | Yes                                                  |                 |               |               |                  |                |                |            |                 |            |                 |                 |
| 1324          | 8/11/2011   | Kitchen Sink                   | Valley               |                                                      |                 |               |               |                  |                |                |            |                 |            |                 |                 |
| 1325          | 8/11/2011   | Kitchen Sink                   | Upland               |                                                      |                 |               |               |                  |                |                |            |                 |            |                 |                 |
| 1326          | 8/11/2011   | Kitchen Sink                   | Upland               |                                                      |                 |               |               |                  |                |                |            |                 |            |                 |                 |
| 1327          | 8/11/2011   | Kitchen Sink                   | Upland               |                                                      |                 |               |               |                  |                |                |            |                 |            |                 |                 |
| 1328          | 8/11/2011   | Kitchen Sink                   | Upland               |                                                      |                 |               |               |                  |                |                |            |                 |            |                 |                 |

Table S.8. Groundwater Quality Data for 1701 "Pre-Drill" Water Well Samples from Susquehanna County, Pennsylvania

| Water Well ID | Sample Date | Sampling Port  | Topographic Location | Gas Extraction Area (Within 1 km of Active Gas Well) | Selenium (mg/L) | Silver (mg/L) | Sodium (mg/L) | Strontium (mg/L) | Sulfate (mg/L) | Sulfide (mg/L) | TDS (mg/L) | Thallium (mg/L) | TSS (mg/L) | Turbidity (NTU) | Vanadium (mg/L) |
|---------------|-------------|----------------|----------------------|------------------------------------------------------|-----------------|---------------|---------------|------------------|----------------|----------------|------------|-----------------|------------|-----------------|-----------------|
| 1329          | 8/11/2011   | Kitchen Sink   | Upland               |                                                      |                 |               |               |                  |                |                |            |                 |            |                 |                 |
| 1330          | 8/6/2009    |                | Valley               |                                                      |                 |               |               | 0.163            |                | < 1            | 292        |                 | < 2        |                 |                 |
| 1331          | 8/11/2011   | Kitchen Sink   | Upland               |                                                      |                 |               |               |                  |                |                |            |                 |            |                 |                 |
| 1332          | 8/11/2011   | Kitchen Sink   | Valley               |                                                      |                 |               |               |                  |                |                |            |                 |            |                 |                 |
| 1333          | 8/11/2011   | Kitchen Sink   | Upland               |                                                      |                 |               |               |                  |                |                |            |                 |            |                 |                 |
| 1334          | 8/11/2011   | Kitchen Sink   | Valley               |                                                      |                 |               |               |                  |                |                |            |                 |            |                 |                 |
| 1335          | 8/12/2011   | Kitchen Sink   | Valley               |                                                      |                 |               |               |                  |                |                |            |                 |            |                 |                 |
| 1336          | 8/12/2011   | Kitchen Sink   | Valley               |                                                      |                 |               |               |                  |                |                |            |                 |            |                 |                 |
| 1337          | 8/12/2011   | Kitchen Sink   | Valley               |                                                      |                 |               |               |                  |                |                |            |                 |            |                 |                 |
| 1338          | 8/12/2011   | Kitchen Sink   | Valley               |                                                      |                 |               |               |                  |                |                |            |                 |            |                 |                 |
| 1339          | 8/12/2011   | Kitchen Sink   | Valley               |                                                      |                 |               |               |                  |                |                |            |                 |            |                 |                 |
| 1340          | 5/13/2010   |                | Upland               | Yes                                                  |                 |               |               |                  |                | < 1            | 125        |                 | < 2        |                 |                 |
| 1341          | 8/12/2011   | Pressure Tank  | Upland               |                                                      |                 |               |               |                  |                |                |            |                 |            |                 |                 |
| 1342          | 8/12/2011   | Kitchen Sink   | Valley               |                                                      |                 |               |               |                  |                |                |            |                 |            |                 |                 |
| 1343          | 8/12/2011   | Bathroom Sink  | Valley               |                                                      |                 |               |               |                  |                |                |            |                 |            |                 |                 |
| 1344          | 8/14/2011   | Outside Spigot | Valley               |                                                      |                 |               |               |                  |                |                |            |                 |            |                 |                 |
| 1345          | 8/14/2011   | Kitchen Sink   | Upland               |                                                      |                 |               |               |                  |                |                |            |                 |            |                 |                 |
| 1346          | 5/13/2010   |                | Upland               |                                                      |                 |               |               | 1.29             |                | < 1            | 85         | < .002          | < 2        |                 | < .01           |
| 1347          | 8/14/2011   | Kitchen Sink   | Valley               |                                                      |                 |               |               |                  |                |                |            |                 |            |                 |                 |
| 1348          | 8/14/2011   | Kitchen Sink   | Upland               |                                                      |                 |               |               |                  |                |                |            |                 |            |                 |                 |
| 1349          | 8/14/2011   | Kitchen Sink   | Upland               |                                                      |                 |               |               |                  |                |                |            |                 |            |                 |                 |
| 1350          | 8/14/2011   | Pressure Tank  | Upland               |                                                      |                 |               |               |                  |                |                |            |                 |            |                 |                 |
| 1351          | 8/14/2011   | Kitchen Sink   | Upland               |                                                      |                 |               |               |                  |                |                |            |                 |            |                 |                 |
| 1352          | 8/15/2011   | Kitchen Sink   | Upland               |                                                      |                 |               |               |                  |                |                |            |                 |            |                 |                 |
| 1353          | 8/15/2011   | Barn Sink      | Upland               |                                                      |                 |               |               |                  |                |                |            |                 |            |                 |                 |
| 1354          | 8/15/2011   | Kitchen Sink   | Valley               |                                                      |                 |               |               |                  |                |                |            |                 |            |                 |                 |
| 1355          | 8/15/2011   | Kitchen Sink   | Valley               |                                                      |                 |               |               |                  |                |                |            |                 |            |                 |                 |
| 1356          | 8/15/2011   | Sink In Barn   | Valley               |                                                      |                 |               |               |                  |                |                |            |                 |            |                 |                 |

Table S.8. Groundwater Quality Data for 1701 "Pre-Drill" Water Well Samples from Susquehanna County, Pennsylvania

| Water Well ID | Sample Date | Sampling Port             | Topographic Location | Gas Extraction Area (Within 1 km of Active Gas Well) | Selenium (mg/L) | Silver (mg/L) | Sodium (mg/L) | Strontium (mg/L) | Sulfate (mg/L) | Sulfide (mg/L) | TDS (mg/L) | Thallium (mg/L) | TSS (mg/L) | Turbidity (NTU) | Vanadium (mg/L) |
|---------------|-------------|---------------------------|----------------------|------------------------------------------------------|-----------------|---------------|---------------|------------------|----------------|----------------|------------|-----------------|------------|-----------------|-----------------|
| 1357          | 8/16/2011   | Kitchen Sink              | Upland               |                                                      |                 |               |               |                  |                |                |            |                 |            |                 |                 |
| 1358          | 8/16/2011   | Outside Spigot            | Upland               |                                                      |                 |               |               |                  |                |                |            |                 |            |                 |                 |
| 1359          | 8/16/2011   | Kitchen Sink              | Upland               |                                                      |                 |               |               |                  |                |                |            |                 |            |                 |                 |
| 1360          | 8/16/2011   | Kitchen Sink              | Upland               |                                                      |                 |               |               |                  |                |                |            |                 |            |                 |                 |
| 1361          | 8/16/2011   | Kitchen Sink              | Valley               |                                                      |                 |               |               |                  |                |                |            |                 |            |                 |                 |
| 1362          | 8/16/2011   | Spigot On Side Of House   | Upland               |                                                      |                 |               |               |                  |                |                |            |                 |            |                 |                 |
| 1363          | 8/17/2011   | Kitchen Sink              | Upland               |                                                      |                 |               |               |                  |                |                |            |                 |            |                 |                 |
| 1364          | 8/17/2011   | Outside Spigot            | Valley               |                                                      |                 |               |               |                  |                |                |            |                 |            |                 |                 |
| 1365          | 8/17/2011   | Kitchen Sink              | Upland               |                                                      |                 |               |               |                  |                |                |            |                 |            |                 |                 |
| 1366          | 8/17/2011   | Kitchen Sink              | Valley               |                                                      |                 |               |               |                  |                |                |            |                 |            |                 |                 |
| 1367          | 8/17/2011   | Kitchen Sink              | Valley               |                                                      |                 |               |               |                  |                |                |            |                 |            |                 |                 |
| 1368          | 8/17/2011   | Kitchen Sink              | Valley               |                                                      |                 |               |               |                  |                |                |            |                 |            |                 |                 |
| 1369          | 8/18/2011   | Kitchen Sink              | Upland               |                                                      |                 |               |               |                  |                |                |            |                 |            |                 |                 |
| 1370          | 2/8/2010    | Basement At Pressure Tank | Upland               | Yes                                                  |                 |               |               | 1.2              |                | < 1            | 200        |                 | < 2        | < 1             |                 |
| 1371          | 8/18/2011   | Kitchen Sink              | Valley               |                                                      |                 |               |               |                  |                |                |            |                 |            |                 |                 |
| 1372          | 8/18/2011   | Kitchen Sink              | Valley               |                                                      |                 |               |               |                  |                |                |            |                 |            |                 |                 |
| 1373          | 8/18/2011   | Kitchen Sink              | Valley               |                                                      |                 |               |               |                  |                |                |            |                 |            |                 |                 |
| 1374          | 8/18/2011   | Barn Sink                 | Upland               |                                                      |                 |               |               |                  |                |                |            |                 |            |                 |                 |
| 1375          | 8/18/2011   | Barn Sink                 | Valley               |                                                      |                 |               |               |                  |                |                |            |                 |            |                 |                 |
| 1376          | 3/8/2010    | Kitchen Sink              | Valley               | Yes                                                  |                 |               |               | 0.209            |                | < 1            | 165        |                 | < 2        | < 1             |                 |
| 1377          | 8/18/2011   | Kitchen Sink              | Upland               |                                                      |                 |               |               |                  |                |                |            |                 |            |                 |                 |
| 1378          | 8/19/2011   | Kitchen Sink              | Upland               |                                                      |                 |               |               |                  |                |                |            |                 |            |                 |                 |
| 1379          | 8/19/2011   | Kitchen Sink              | Upland               |                                                      |                 |               |               |                  |                |                |            |                 |            |                 |                 |
| 1380          | 8/19/2011   | Kitchen Sink              | Upland               |                                                      |                 |               |               |                  |                |                |            |                 |            |                 |                 |
| 1381          | 8/17/2009   |                           | Valley               |                                                      |                 |               |               | 0.41             |                | < 1            | 253        |                 | < 2        |                 |                 |
| 1382          | 8/19/2011   |                           | Valley               |                                                      |                 |               |               |                  |                |                |            |                 |            |                 |                 |



Table S.8. Groundwater Quality Data for 1701 "Pre-Drill" Water Well Samples from Susquehanna County, Pennsylvania

| Water Well ID | Sample Date | Sampling Port               | Topographic Location | Gas Extraction Area (Within 1 km of Active Gas Well) | Selenium (mg/L) | Silver (mg/L) | Sodium (mg/L) | Strontium (mg/L) | Sulfate (mg/L) | Sulfide (mg/L) | TDS (mg/L) | Thallium (mg/L) | TSS (mg/L) | Turbidity (NTU) | Vanadium (mg/L) |
|---------------|-------------|-----------------------------|----------------------|------------------------------------------------------|-----------------|---------------|---------------|------------------|----------------|----------------|------------|-----------------|------------|-----------------|-----------------|
| 1383          | 8/19/2011   | Kitchen Sink                | Valley               |                                                      |                 |               |               |                  |                |                |            |                 |            |                 |                 |
| 1384          | 8/22/2011   | Kitchen Sink                | Upland               |                                                      |                 |               |               |                  |                |                |            |                 |            |                 |                 |
| 1385          | 8/22/2011   | Kitchen Sink                | Upland               |                                                      |                 |               |               |                  |                |                |            |                 |            |                 |                 |
| 1386          | 8/23/2011   | Outside Spigot              | Upland               |                                                      |                 |               |               |                  |                |                |            |                 |            |                 |                 |
| 1387          | 8/23/2011   | Barn Outside Spigot         | Upland               |                                                      |                 |               |               |                  |                |                |            |                 |            |                 |                 |
| 1388          | 8/23/2011   | Outside Spigot              | Upland               |                                                      |                 |               |               |                  |                |                |            |                 |            |                 |                 |
| 1389          | 3/4/2010    | Post Office - Bathroom Sink | Upland               | Yes                                                  |                 |               |               | 2.42             |                | < 1            | 255        |                 | < 2        | < 1             |                 |
| 1390          | 8/23/2011   | Outside Spigot              | Valley               |                                                      |                 |               |               |                  |                |                |            |                 |            |                 |                 |
| 1391          | 8/23/2011   | Outside Spigot              | Upland               |                                                      |                 |               |               |                  |                |                |            |                 |            |                 |                 |
| 1392          | 8/24/2011   | Kitchen Sink                | Upland               |                                                      |                 |               |               |                  |                |                |            |                 |            |                 |                 |
| 1393          | 8/24/2011   | Kitchen Sink                | Upland               |                                                      |                 |               |               |                  |                |                |            |                 |            |                 |                 |
| 1394          | 8/24/2011   | Kitchen Sink                | Valley               |                                                      |                 |               |               |                  |                |                |            |                 |            |                 |                 |
| 1395          | 8/24/2011   | Kitchen Sink                | Upland               |                                                      |                 |               |               |                  |                |                |            |                 |            |                 |                 |
| 1396          | 8/24/2011   | Kitchen Sink                | Valley               |                                                      |                 |               |               |                  |                |                |            |                 |            |                 |                 |
| 1397          | 8/24/2011   | Inside Faucet               | Upland               |                                                      |                 |               |               |                  |                |                |            |                 |            |                 |                 |
| 1398          | 8/24/2011   | Kitchen Sink                | Upland               |                                                      |                 |               |               |                  |                |                |            |                 |            |                 |                 |
| 1399          | 8/24/2011   | Kitchen Sink                | Valley               |                                                      |                 |               |               |                  |                |                |            |                 |            |                 |                 |
| 1400          | 3/8/2010    | Basement At Pressure Tank   | Upland               |                                                      |                 |               |               | 0.057            |                | < 1            | 125        |                 | < 2        | 3               |                 |
| 1401          | 8/24/2011   | Kitchen Sink                | Upland               |                                                      |                 |               |               |                  |                |                |            |                 |            |                 |                 |
| 1402          | 8/24/2011   | Kitchen Sink                | Upland               |                                                      |                 |               |               |                  |                |                |            |                 |            |                 |                 |
| 1403          | 8/24/2011   | Kitchen Sink                | Upland               |                                                      |                 |               |               |                  |                |                |            |                 |            |                 |                 |
| 1404          | 8/24/2011   | Bathroom Sink               | Valley               |                                                      |                 |               |               |                  |                |                |            |                 |            |                 |                 |
| 1405          | 8/24/2011   | Kitchen Sink                | Valley               |                                                      |                 |               |               |                  |                |                |            |                 |            |                 |                 |
| 1406          | 8/25/2011   | Kitchen Sink                | Valley               |                                                      |                 |               |               |                  |                |                |            |                 |            |                 |                 |

Table S.8. Groundwater Quality Data for 1701 "Pre-Drill" Water Well Samples from Susquehanna County, Pennsylvania

| Water Well ID | Sample Date | Sampling Port             | Topographic Location | Gas Extraction Area (Within 1 km of Active Gas Well) | Selenium (mg/L) | Silver (mg/L) | Sodium (mg/L) | Strontium (mg/L) | Sulfate (mg/L) | Sulfide (mg/L) | TDS (mg/L) | Thallium (mg/L) | TSS (mg/L) | Turbidity (NTU) | Vanadium (mg/L) |
|---------------|-------------|---------------------------|----------------------|------------------------------------------------------|-----------------|---------------|---------------|------------------|----------------|----------------|------------|-----------------|------------|-----------------|-----------------|
| 1407          | 8/25/2011   | Kitchen Sink              | Valley               |                                                      |                 |               |               |                  |                |                |            |                 |            |                 |                 |
| 1408          | 8/25/2011   | Kitchen Sink              | Valley               |                                                      |                 |               |               |                  |                |                |            |                 |            |                 |                 |
| 1409          | 8/25/2011   | Downstairs Sink           | Valley               |                                                      |                 |               |               |                  |                |                |            |                 |            |                 |                 |
| 1410          | 8/25/2011   | Kitchen Sink              | Upland               |                                                      |                 |               |               |                  |                |                |            |                 |            |                 |                 |
| 1411          | 8/25/2011   | Kitchen Sink              | Valley               |                                                      |                 |               |               |                  |                |                |            |                 |            |                 |                 |
| 1412          | 8/25/2011   | Kitchen Sink              | Valley               |                                                      |                 |               |               |                  |                |                |            |                 |            |                 |                 |
| 1413          | 8/26/2011   | Kitchen Sink              | Upland               |                                                      |                 |               |               |                  |                |                |            |                 |            |                 |                 |
| 1414          | 8/26/2011   | Outside Spigot            | Valley               |                                                      |                 |               |               |                  |                |                |            |                 |            |                 |                 |
| 1415          | 8/26/2011   | Kitchen Sink              | Upland               |                                                      |                 |               |               |                  |                |                |            |                 |            |                 |                 |
| 1416          | 8/26/2011   | Kitchen Sink              | Valley               |                                                      |                 |               |               |                  |                |                |            |                 |            |                 |                 |
| 1417          | 8/26/2011   | Kitchen Sink              | Upland               |                                                      |                 |               |               |                  |                |                |            |                 |            |                 |                 |
| 1418          | 8/26/2011   | Kitchen Sink              | Upland               |                                                      |                 |               |               |                  |                |                |            |                 |            |                 |                 |
| 1419          | 8/26/2011   | Barn Sink                 | Valley               |                                                      |                 |               |               |                  |                |                |            |                 |            |                 |                 |
| 1420          | 8/27/2011   | Kitchen Sink              | Upland               |                                                      |                 |               |               |                  |                |                |            |                 |            |                 |                 |
| 1421          | 8/27/2011   | Kitchen Sink              | Upland               |                                                      |                 |               |               |                  |                |                |            |                 |            |                 |                 |
| 1422          | 10/30/2009  | Basement At Pressure Tank | Upland               | Yes                                                  |                 |               |               | 0.068            |                | < 1            | 100        |                 | < 2        |                 |                 |
| 1423          | 8/31/2011   | Kitchen Sink              | Upland               |                                                      |                 |               |               |                  |                |                |            |                 |            |                 |                 |
| 1424          | 8/31/2011   | Kitchen Sink              | Valley               |                                                      |                 |               |               |                  |                |                |            |                 |            |                 |                 |
| 1425          | 8/31/2011   | Spigot On Well            | Valley               |                                                      |                 |               |               |                  |                |                |            |                 |            |                 |                 |
| 1426          | 8/31/2011   | Kitchen Sink              | Upland               |                                                      |                 |               |               |                  |                |                |            |                 |            |                 |                 |
| 1427          | 9/1/2011    | Kitchen Sink              | Valley               |                                                      |                 |               |               |                  |                |                |            |                 |            |                 |                 |
| 1428          | 9/1/2011    | Spigot Side Of House      | Valley               |                                                      |                 |               |               |                  |                |                |            |                 |            |                 |                 |
| 1429          | 9/2/2011    | Kitchen Sink              | Upland               |                                                      |                 |               |               |                  |                |                |            |                 |            |                 |                 |
| 1430          | 9/2/2011    | Spigot On Well            | Valley               |                                                      |                 |               |               |                  |                |                |            |                 |            |                 |                 |
| 1431          | 3/7/2010    | Kitchen Sink              | Valley               |                                                      |                 |               |               | < .025           |                | < 1            | 285        |                 | < 2        | < 1             |                 |

Table S.8. Groundwater Quality Data for 1701 "Pre-Drill" Water Well Samples from Susquehanna County, Pennsylvania

| Water Well ID | Sample Date | Sampling Port             | Topographic Location | Gas Extraction Area (Within 1 km of Active Gas Well) | Selenium (mg/L) | Silver (mg/L) | Sodium (mg/L) | Strontium (mg/L) | Sulfate (mg/L) | Sulfide (mg/L) | TDS (mg/L) | Thallium (mg/L) | TSS (mg/L) | Turbidity (NTU) | Vanadium (mg/L) |
|---------------|-------------|---------------------------|----------------------|------------------------------------------------------|-----------------|---------------|---------------|------------------|----------------|----------------|------------|-----------------|------------|-----------------|-----------------|
| 1432          | 9/2/2011    | Kitchen Sink              | Upland               |                                                      |                 |               |               |                  |                |                |            |                 |            |                 |                 |
| 1433          | 9/2/2011    | Kitchen Sink              | Valley               |                                                      |                 |               |               |                  |                |                |            |                 |            |                 |                 |
| 1434          | 9/2/2011    | Bathroom Sink             | Upland               |                                                      |                 |               |               |                  |                |                |            |                 |            |                 |                 |
| 1435          | 9/2/2011    | Kitchen Sink              | Upland               |                                                      |                 |               |               |                  |                |                |            |                 |            |                 |                 |
| 1436          | 9/2/2011    | Well Spigot               | Upland               |                                                      |                 |               |               |                  |                |                |            |                 |            |                 |                 |
| 1437          | 3/8/2010    | Basement At Pressure Tank | Upland               |                                                      |                 |               |               | 0.096            |                | < 1            | 230        |                 | < 2        | < 1             |                 |
| 1438          | 9/2/2011    | Kitchen Sink              | Valley               |                                                      |                 |               |               |                  |                |                |            |                 |            |                 |                 |
| 1439          | 9/7/2011    | Kitchen Sink              | Upland               |                                                      |                 |               |               |                  |                |                |            |                 |            |                 |                 |
| 1440          | 9/7/2011    | Kitchen Sink              | Upland               |                                                      |                 |               |               |                  |                |                |            |                 |            |                 |                 |
| 1441          | 9/7/2011    | Kitchen Sink              | Valley               |                                                      |                 |               |               |                  |                |                |            |                 |            |                 |                 |
| 1442          | 9/7/2011    | Kitchen Sink              | Upland               |                                                      |                 |               |               |                  |                |                |            |                 |            |                 |                 |
| 1443          | 9/8/2011    | Kitchen Faucet            | Valley               |                                                      |                 |               |               |                  |                |                |            |                 |            |                 |                 |
| 1444          | 9/8/2011    | Kitchen Sink              | Valley               |                                                      |                 |               |               |                  |                |                |            |                 |            |                 |                 |
| 1445          | 9/8/2011    | Outside Spigot            | Upland               |                                                      |                 |               |               |                  |                |                |            |                 |            |                 |                 |
| 1446          | 9/8/2011    | Kitchen Sink              | Valley               |                                                      |                 |               |               |                  |                |                |            |                 |            |                 |                 |
| 1447          | 9/8/2011    | Kitchen Sink              | Upland               |                                                      |                 |               |               |                  |                |                |            |                 |            |                 |                 |
| 1448          | 9/8/2011    | Kitchen Sink              | Upland               |                                                      |                 |               |               |                  |                |                |            |                 |            |                 |                 |
| 1449          | 9/8/2011    | Kitchen Sink              | Upland               |                                                      |                 |               |               |                  |                |                |            |                 |            |                 |                 |
| 1450          | 3/8/2010    | Basement Pressure Tank    | Upland               |                                                      |                 |               |               | 1.18             |                | < 1            | 160        |                 | < 2        | < 1             |                 |
| 1451          | 8/20/2009   |                           | Upland               | Yes                                                  |                 |               |               | 1.64             |                | < 1            | 180        |                 | < 2        |                 |                 |
| 1452          | 3/7/2010    | Pressure Tank             | Upland               |                                                      |                 |               |               | 0.347            |                | < 1            | 125        |                 | < 2        | < 1             |                 |
| 1453          | 3/7/2010    | Kitchen Sink              | Upland               |                                                      |                 |               |               | 0.194            |                | < 1            | 164        |                 | 2.8        | < 1             |                 |
| 1454          | 3/11/2010   | Pressure Tank             | Valley               |                                                      |                 |               |               | 0.31             |                | < 1            | 200        |                 | < 2        | < 1             |                 |
| 1455          | 5/1/2010    | Kitchen Sink              | Valley               |                                                      |                 |               |               | 0.608            |                | < 1            | 140        | < .002          | < 2        |                 | < .01           |
| 1456          | 5/1/2010    | Kitchen Sink              | Valley               |                                                      |                 |               |               | < .025           |                | < 1            | 48         | < .002          | < 2        |                 | < .01           |

Table S.8. Groundwater Quality Data for 1701 "Pre-Drill" Water Well Samples from Susquehanna County, Pennsylvania

| Water Well ID | Sample Date | Sampling Port                  | Topographic Location | Gas Extraction Area (Within 1 km of Active Gas Well) | Selenium (mg/L) | Silver (mg/L) | Sodium (mg/L) | Strontium (mg/L) | Sulfate (mg/L) | Sulfide (mg/L) | TDS (mg/L) | Thallium (mg/L) | TSS (mg/L) | Turbidity (NTU) | Vanadium (mg/L) |
|---------------|-------------|--------------------------------|----------------------|------------------------------------------------------|-----------------|---------------|---------------|------------------|----------------|----------------|------------|-----------------|------------|-----------------|-----------------|
| 1457          | 5/3/2010    | Outside Spigot On Garage       | Upland               | Yes                                                  |                 |               |               | < .025           |                | < 1            | 42         | < .002          | 2.4        |                 | < .01           |
| 1458          | 5/6/2010    | Kitchen Sink                   | Upland               |                                                      |                 |               |               | 0.05             |                | < 1            | 105        | < .002          | < 2        |                 | < .01           |
| 1459          | 5/6/2010    | Kitchen Sink                   | Valley               | Yes                                                  |                 |               |               | 0.907            |                | 6              | 350        | < .002          | 6.7        |                 | < .01           |
| 1460          | 5/7/2010    | Kitchen Sink                   | Valley               | Yes                                                  |                 |               |               | 1.04             |                | 1              | 140        | < .002          | < 2        |                 | < .01           |
| 1461          | 8/24/2011   | Kitchen Sink                   | Valley               |                                                      | < .005          | < .001        | 6.2           | 0.18             | 9.8            | < 3            | 110        |                 | < 4        | 1.5             |                 |
| 1462          | 8/24/2011   | Inside Faucet                  | Valley               |                                                      | < .005          | < .001        | 11            | 0.32             | 9.4            | < 3            | 140        |                 | < 4        | < .85           |                 |
| 1463          | 8/24/2011   | Pressure Tank Hose Bib         | Upland               |                                                      | < .005          | < .001        | 11            | 0.24             | 7              | < 3            | 100        |                 | < 4        | < .85           |                 |
| 1464          | 5/7/2010    | Outside Spigot                 | Upland               |                                                      |                 |               |               | 0.212            |                | < 1            | 65         | < .002          | < 2        |                 | < .01           |
| 1465          | 8/30/2011   | Inside Faucet                  | Valley               |                                                      | < .005          | < .001        | 25            | 0.31             | 12             | < 3            | 190        |                 | < 4        | 4.5             |                 |
| 1466          | 5/13/2010   | Kitchen Sink                   | Valley               |                                                      |                 |               |               | 0.139            |                | < 1            | 95         | < .002          | < 2        |                 | < .01           |
| 1467          | 8/30/2011   | Pressure Tank                  | Valley               |                                                      | < .005          | < .001        | 18            | 0.34             | 8.9            | < 3            | 140        |                 | < 4        | 2.9             |                 |
| 1468          | 5/13/2010   | Kitchen Sink                   | Upland               |                                                      |                 |               |               | 0.289            |                | < 1            | 125        | < .002          | < 2        |                 | < .01           |
| 1469          | 5/13/2010   | Outside Spigot                 | Upland               |                                                      |                 |               |               | 0.102            |                | < 1            | 155        | < .002          | < 2        |                 | < .01           |
| 1470          | 8/30/2011   | Inside Faucet                  | Upland               |                                                      | < .005          | < .001        | 12            | 0.62             | 12             | < 3            | 110        |                 | < 4        | < .85           |                 |
| 1471          | 7/7/2009    | Kitchen Sink                   | Upland               |                                                      |                 |               |               | 0.227            |                | < 1            | 52         |                 | < 2        |                 |                 |
| 1472          | 5/20/2010   | Kitchen Sink                   | Upland               |                                                      |                 |               |               | 0.778            |                | < 1            |            | < .002          |            |                 | < .01           |
| 1473          | 5/20/2010   | Basement At Pressure Tank      | Upland               |                                                      |                 |               |               | 0.137            |                |                |            | < .002          |            |                 | < .01           |
| 1474          | 5/20/2010   | Pressure Tank- Quarry Top Well | Upland               |                                                      |                 |               |               |                  |                | < 1            |            |                 |            |                 |                 |
| 1475          | 5/20/2010   | Pressure Tank At Trailer Park  | Upland               |                                                      |                 |               |               | 0.725            |                | < 1            |            | < .002          |            |                 | 0.01            |
| 1476          | 5/20/2010   | Quarry Sulfur Well             | Upland               |                                                      |                 |               |               | 0.724            |                | < 1            |            | < .002          |            |                 | < .01           |
| 1477          | 5/20/2010   | Spigot In Garage               | Upland               |                                                      |                 |               |               | 0.07             |                | < 1            |            | < .002          |            |                 | < .01           |
| 1478          | 3/16/2010   | Outside Spigot                 | Upland               |                                                      |                 |               |               | 0.073            |                | < 1            | 104        |                 | < 2        | < 1             |                 |

Table S.8. Groundwater Quality Data for 1701 "Pre-Drill" Water Well Samples from Susquehanna County, Pennsylvania

| Water Well ID | Sample Date | Sampling Port                                      | Topographic Location | Gas Extraction Area (Within 1 km of Active Gas Well) | Selenium (mg/L) | Silver (mg/L) | Sodium (mg/L) | Strontium (mg/L) | Sulfate (mg/L) | Sulfide (mg/L) | TDS (mg/L) | Thallium (mg/L) | TSS (mg/L) | Turbidity (NTU) | Vanadium (mg/L) |
|---------------|-------------|----------------------------------------------------|----------------------|------------------------------------------------------|-----------------|---------------|---------------|------------------|----------------|----------------|------------|-----------------|------------|-----------------|-----------------|
| 1479          | 4/19/2009   | Kitchen Sink                                       | Upland               |                                                      |                 |               |               | 0.122            |                | < 1            | 135        |                 | < 2        |                 |                 |
| 1480          | 3/18/2010   | Kitchen Sink                                       | Upland               |                                                      |                 |               |               | 0.025            |                | < 1            | 64         | < .002          | < 2        |                 | < .01           |
| 1481          | 3/18/2010   | Pressure Tank                                      | Upland               | Yes                                                  |                 |               |               | 0.047            |                | < 1            | 104        | < .002          | 2          |                 | < .01           |
| 1482          | 3/22/2010   | Kitchen Sink                                       | Valley               | Yes                                                  |                 |               |               | 0.072            |                | 1              | 80         | < .002          | 6          |                 | < .01           |
| 1483          | 1/13/2011   |                                                    | Valley               | Yes                                                  | < .002          | < .001        | 13            | 0.65             | < 5            | < 1            | 132        |                 | < 2        | < 1             |                 |
| 1484          | 3/25/2010   | Basement At Pressure Tank                          | Upland               |                                                      |                 |               |               | 0.232            |                | < 1            | 148        | < .002          | < 2        |                 | < .01           |
| 1485          | 3/25/2010   | Hand Dug Well                                      | Valley               |                                                      |                 |               |               | < .025           |                | < 1            | 40         | < .002          | < 2        |                 | < .01           |
| 1486          | 6/14/2011   | Directly From Pressure Tank Cwt In Sw Corner Of Ba | Upland               | Yes                                                  | < .005          | < .001        | 3.5           | 0.11             | 8.8            | < 3            | 92         |                 | < 4        | 25              |                 |
| 1487          | 6/14/2011   | Kitchen Sink                                       | Upland               |                                                      | < .005          | < .001        | 13            | 0.41             | 17             | < 3            | 170        |                 | < 4        | < .85           |                 |
| 1488          | 6/14/2011   | Hose Bib                                           | Upland               |                                                      | < .005          | < .001        | 4.2           | 0.043            | 37             | < 3            | 160        |                 | < 4        | 1.3             |                 |
| 1489          | 3/25/2010   | Spring At Overflow Pipe                            | Valley               |                                                      |                 |               |               | < .026           |                | < 1            | 64         | < .002          | < 2        |                 | < .01           |
| 1490          | 6/14/2011   | Outside Hose Bib On Sw End Of Home                 | Valley               |                                                      | < .005          | < .001        | 11            | 0.85             | 11             | < 3            | 180        |                 | < 4        | 2.2             |                 |
| 1491          | 3/28/2010   | Basement At Pressure Tank                          | Upland               |                                                      |                 |               |               | 0.859            |                | 4              | 224        | < .002          | 9.2        |                 | < .01           |
| 1492          | 1/13/2011   |                                                    | Upland               | Yes                                                  | <0.0020         | <0.0010       | 9.6           | 0.36             | 10             | <1             | 192        |                 | <2         | <1              |                 |
| 1493          | 6/16/2011   | Wash Tub In Garage                                 | Upland               |                                                      | < .005          | < .001        | 12            | 0.51             | 16             | < 3            | 160        |                 | < 4        | < .85           |                 |
| 1494          | 6/16/2011   | Kitchen Sink                                       | Valley               |                                                      | < .005          | < .001        | 32            | 0.07             | 13             | < 3            | 170        |                 | < 4        | < .85           |                 |
| 1495          | 6/27/2011   | Bathroom Sink Body Shop                            | Valley               | Yes                                                  | < .005          | < .001        | 9.5           | 0.48             | 8.8            | < 3            | 120        |                 | < 4        | < .85           |                 |
| 1496          | 6/28/2011   | Garage Sink                                        | Valley               |                                                      | < .005          | < .001        | 5.4           | 0.12             | 12             | < 3            | 130        |                 | < 4        | < .85           |                 |
| 1497          | 6/28/2011   | Kitchen Sink                                       | Upland               |                                                      | < .005          | < .001        | 3             | 0.15             | 16             | < 3            | 160        |                 | < 4        | < .85           |                 |

Table S.8. Groundwater Quality Data for 1701 "Pre-Drill" Water Well Samples from Susquehanna County, Pennsylvania

| Water Well ID | Sample Date | Sampling Port               | Topographic Location | Gas Extraction Area (Within 1 km of Active Gas Well) | Selenium (mg/L) | Silver (mg/L) | Sodium (mg/L) | Strontium (mg/L) | Sulfate (mg/L) | Sulfide (mg/L) | TDS (mg/L) | Thallium (mg/L) | TSS (mg/L) | Turbidity (NTU) | Vanadium (mg/L) |
|---------------|-------------|-----------------------------|----------------------|------------------------------------------------------|-----------------|---------------|---------------|------------------|----------------|----------------|------------|-----------------|------------|-----------------|-----------------|
| 1498          | 3/18/2010   | Kitchen Sink                | Upland               |                                                      |                 |               |               | 0.826            |                | < 1            | 188        | < .002          | < 2        |                 | < .01           |
| 1499          | 5/21/2010   | Kitchen Sink                | Upland               | Yes                                                  |                 |               |               | 0.445            |                |                |            | < .002          |            |                 | < .01           |
| 1500          | 5/21/2010   | Hand Dug #1                 | Upland               | Yes                                                  |                 |               |               | < .025           |                |                |            | < .002          |            |                 | < .01           |
| 1501          | 7/6/2011    | Kitchen Sink                | Upland               |                                                      | < .005          | < .001        | 5             | 0.37             | 15             | < 3            | 120        |                 | < 4        | < .85           |                 |
| 1502          | 7/6/2011    | Kitchen Sink                | Upland               |                                                      | < .005          | < .001        | 6.6           | 0.51             | 6.5            | < 3            | 80         |                 | < 4        | < .85           |                 |
| 1503          | 5/21/2010   | Hand Dug Well #2            | Upland               | Yes                                                  |                 |               |               | < .025           |                |                |            | < .002          |            |                 | < .01           |
| 1504          | 7/6/2011    | Kitchen Sink                | Valley               |                                                      | < .005          | < .001        | 5             | 0.12             | 4              | < 3            | 88         |                 | < 4        | < .85           |                 |
| 1505          | 7/6/2011    | Kitchen Sink                | Upland               |                                                      | < .005          | < .001        | 6.2           | 0.58             | 13             | < 3            | 150        |                 | < 4        | 8.3             |                 |
| 1506          | 7/7/2011    | Pressure Tank Tap           | Valley               |                                                      | < .005          | < .001        | 5.3           | 0.048            | 14             | < 3            | 110        |                 | < 4        | 1.1             |                 |
| 1507          | 5/21/2010   |                             | Valley               |                                                      |                 |               |               | 0.805            |                |                |            | < .002          |            |                 | < .01           |
| 1508          | 7/14/2011   | Outdoor Spigot              | Upland               |                                                      | < .005          | < .001        | 7.7           | 0.53             | 12             | < 3            | 160        |                 | < 4        | < .85           |                 |
| 1509          | 7/16/2011   | Pressure Tank               | Valley               |                                                      | < .005          | < .001        | 17            | 0.33             | 8.5            | < 3            | 130        |                 | < 4        | 17              |                 |
| 1510          | 5/22/2010   | Spare Well                  | Upland               |                                                      |                 |               |               | 0.041            |                |                |            | < .002          |            |                 | < .01           |
| 1511          | 5/22/2010   | Kitchen Sink                | Upland               |                                                      |                 |               |               | 0.095            |                |                |            | < .002          |            |                 | < .01           |
| 1512          | 7/18/2011   | Outside Hose Bib            | Upland               |                                                      | < .005          | < .001        | 7             | 0.17             | 11             | < 3            | 130        |                 | 16         | 21              |                 |
| 1513          | 7/18/2011   | Hydrant Northwest Of Well   | Upland               |                                                      | < .005          | < .001        | 23            | 1.6              | 13             | < 3            | 200        |                 | < 4        | < .85           |                 |
| 1514          | 7/18/2011   |                             | Valley               | Yes                                                  | < .005          | < .001        | 5.5           | 0.055            | 16             | < 3            | 110        |                 | < 4        | < .85           |                 |
| 1515          | 5/16/2011   | Pressure Tank               | Upland               |                                                      | <0.005          | <0.001        | 5.5           | 0.047            | 12             | <3             | 110        |                 | <4         | <0.85           |                 |
| 1516          | 5/16/2011   | Slop Sink In Barn           | Upland               |                                                      | < .005          | < .001        | 4.7           | 0.042            | 12             | < 3            | 96         |                 | < 4        | 2               |                 |
| 1517          | 5/16/2011   | Pressure Tank               | Upland               |                                                      | < .005          | < .001        | 12            | 0.27             | 9.6            | < 3            | 150        |                 | < 4        | 2.2             |                 |
| 1518          | 5/16/2011   | Outdoor Spigot              | Upland               |                                                      | < .005          | < .001        | 1.5           | 0.034            | 7.6            | < 3            | 60         |                 | < 4        | 4.6             |                 |
| 1519          | 7/25/2011   | Kitchen Sink Cold Water Tap | Upland               |                                                      | < .005          | < .001        | 8.5           | 0.17             | 14             | < 3            | 160        |                 | < 4        | 1.3             |                 |
| 1520          | 5/17/2011   | Outside Spigot              | Upland               |                                                      | < .005          | < .001        | 6.7           | 0.32             | 10             | < 3            | 130        |                 | < 4        | < .85           |                 |
| 1521          | 5/17/2011   | Kitchen Sink                | Valley               |                                                      | < .005          | < .001        | 27            | 0.69             | 5.6            | < 3            | 150        |                 | < 4        | < .85           |                 |

Table S.8. Groundwater Quality Data for 1701 "Pre-Drill" Water Well Samples from Susquehanna County, Pennsylvania

| Water Well ID | Sample Date | Sampling Port                     | Topographic Location | Gas Extraction Area (Within 1 km of Active Gas Well) | Selenium (mg/L) | Silver (mg/L) | Sodium (mg/L) | Strontium (mg/L) | Sulfate (mg/L) | Sulfide (mg/L) | TDS (mg/L) | Thallium (mg/L) | TSS (mg/L) | Turbidity (NTU) | Vanadium (mg/L) |
|---------------|-------------|-----------------------------------|----------------------|------------------------------------------------------|-----------------|---------------|---------------|------------------|----------------|----------------|------------|-----------------|------------|-----------------|-----------------|
| 1522          | 5/17/2011   | Kitchen Sink                      | Valley               |                                                      | < .005          | < .001        | 20            | 0.48             | 5.5            | < 3            | 130        |                 | < 4        | < .85           |                 |
| 1523          | 5/17/2011   | Outdoor Spigot                    | Upland               |                                                      | < .005          | < .001        | 5.3           | 0.36             | 9              | < 3            | < 10       |                 | < 4        | < .85           |                 |
| 1524          | 5/17/2011   | Garage Pressure Tank              | Upland               |                                                      | < .005          | < .001        | 5.7           | 0.084            | 7.8            | < 3            | 110        |                 | < 4        | 1.4             |                 |
| 1525          | 3/31/2010   | Spigot On Porch                   | Valley               |                                                      |                 |               |               | < .025           |                | < 1            | 200        | < .002          | 2.8        |                 | < .01           |
| 1526          | 5/17/2011   | Pressure Tank Spigot              | Upland               |                                                      | < .005          | < .001        | 4.2           | 0.17             | 9.9            | < 3            | 110        |                 | < 4        | < .85           |                 |
| 1527          | 3/31/2010   | Hydrant At Well Head              | Upland               |                                                      |                 |               |               | 0.348            |                | < 1            | 128        | < .002          | < 2        |                 | < .01           |
| 1528          | 8/4/2011    | Inside Faucet                     | Valley               |                                                      | < .005          | < .001        | 11            | 0.51             | 14             | < 3            | 150        |                 | < 4        | < .85           |                 |
| 1529          | 8/9/2011    | Outside Faucet                    | Upland               |                                                      | <0.005          | <0.001        | 9.6           | 0.3              | 12             | <3             | 120        |                 | <4         | <0.85           |                 |
| 1530          | 3/28/2010   | Prssure Tank At Fitzsimon'S House | Upland               |                                                      |                 |               |               | 0.026            |                | < 1            | 76         | < .002          | < 2        |                 | < .01           |
| 1531          | 5/18/2011   | Kitchen Sink                      | Upland               |                                                      | <0.005          | <0.001        | 5.5           | 0.081            | 9.4            | <3             | 130        |                 | <4         | <0.85           |                 |
| 1532          | 5/18/2011   | Kitchen Sink                      | Upland               |                                                      | < .005          | < .001        | 36            | 0.21             | 7.6            | < 3            | 130        |                 | < 4        | < .85           |                 |
| 1533          | 5/18/2011   | Kitchen Sink                      | Upland               |                                                      | < .005          | < .001        | 3.6           | 0.036            | 14             | < 3            | 62         |                 | < 4        | 1.1             |                 |
| 1534          | 5/18/2011   | Kitchen Sink                      | Upland               |                                                      | <0.005          | <0.001        | 13            | 0.19             | 9.8            | <3             | 100        |                 | <4         | <0.85           |                 |
| 1535          | 3/28/2010   | Pressure Tank In Furnace Room     | Upland               |                                                      |                 |               |               | 0.074            |                | < 1            | < 2        | < .002          | 112        |                 | < .01           |
| 1536          | 5/19/2011   | Bathroom Sink Body Shop           | Valley               | Yes                                                  | < .005          | < .001        | 9             | 0.38             | 8.9            | < 3            | 130        |                 | < 4        | 0.97            |                 |
| 1537          | 4/1/2010    | Pressure Tank                     | Upland               |                                                      |                 |               |               | 0.1              |                | < 1            | 160        | < .002          | < 2        |                 | < .01           |
| 1538          | 5/24/2011   | Basement Pressure Tank            | Valley               |                                                      | < .005          | < .001        | 96            | 0.21             | 1.8            | < 3            | 230        |                 | < 4        | < .85           |                 |
| 1539          | 5/24/2011   | Kitchen Sink                      | Upland               |                                                      | < .005          | < .001        | 13            | 0.79             | 10             | < 3            | 150        |                 | < 4        | < .85           |                 |
| 1540          | 4/5/2010    | Kitchen Sink                      | Upland               |                                                      |                 |               |               | 0.035            |                | < 1            | 100        | < .002          | 7.2        |                 | < .01           |
| 1541          | 4/5/2010    | Kitchen Sink Father'S             | Upland               |                                                      |                 |               |               | 0.624            |                | 1              | 148        | < .002          | 3.2        |                 | < .01           |

Table S.8. Groundwater Quality Data for 1701 "Pre-Drill" Water Well Samples from Susquehanna County, Pennsylvania

| Water Well ID | Sample Date | Sampling Port                             | Topographic Location | Gas Extraction Area (Within 1 km of Active Gas Well) | Selenium (mg/L) | Silver (mg/L) | Sodium (mg/L) | Strontium (mg/L) | Sulfate (mg/L) | Sulfide (mg/L) | TDS (mg/L) | Thallium (mg/L) | TSS (mg/L) | Turbidity (NTU) | Vanadium (mg/L) |
|---------------|-------------|-------------------------------------------|----------------------|------------------------------------------------------|-----------------|---------------|---------------|------------------|----------------|----------------|------------|-----------------|------------|-----------------|-----------------|
| 1542          | 5/24/2011   | Pressure Tank                             | Valley               | Yes                                                  | < .005          | < .001        | 15            | 0.14             | 15             | < 3            | 180        |                 | 4          | 5               |                 |
| 1543          | 4/1/2010    | Kitchen Sink                              | Upland               |                                                      |                 |               |               | 0.087            |                | < 1            | 124        | < .002          | < 2        |                 | < .01           |
| 1544          | 4/1/2010    | Kitchen Sink                              | Upland               |                                                      |                 |               |               | 0.135            |                | < 1            | 140        | < .002          | < 2        |                 | < .01           |
| 1545          | 6/1/2011    | Kitchen Sink                              | Upland               |                                                      | < .005          | < .001        | 15            | 1.1              | 9.8            | < 3            | 160        |                 | < 4        | < .85           |                 |
| 1546          | 4/1/2010    | Kitchen Sink                              | Upland               |                                                      |                 |               |               | 0.355            |                | < 1            | 168        | < .002          | < 2        |                 | < .01           |
| 1547          | 6/2/2011    | Township Bldg Garage Slop Sink            | Valley               |                                                      | < .005          | < .001        | 31            | 1.4              | 12             | < 3            | 190        |                 | < 4        | < .85           |                 |
| 1548          | 6/3/2011    | Outside Spigot                            | Valley               |                                                      | < .005          | < .001        | 65            | 1                | 9.2            | < 3            | 190        |                 | < 4        | < .85           |                 |
| 1549          | 6/3/2011    | Pressure Tank                             | Valley               | Yes                                                  | <0.005          | <0.001        | 13            | 0.47             | 15             | <3             | 170        |                 | <4         | <0.85           |                 |
| 1550          | 6/9/2011    | Outside Spigot                            | Valley               | Yes                                                  | < .005          | < .001        | 8.8           | 0.19             | 13             | < 3            | 150        |                 | < 4        | < .85           |                 |
| 1551          | 6/9/2011    | Kitchen Sink                              | Upland               |                                                      | < .005          | < .001        | 13            | 0.71             | 11             | < 3            | 200        |                 | < 4        | < .85           |                 |
| 1552          | 6/10/2011   | Pressure Tank (Basement Back Left Closet) | Valley               | Yes                                                  | < .005          | < .001        | 7.6           | 0.57             | 16             | < 3            | 170        |                 | < 4        | < .85           |                 |
| 1553          | 6/10/2011   |                                           | Valley               |                                                      | <0.005          | <0.001        | 24            | 0.64             | 19             | <3             | 210        |                 | <4         | <0.85           |                 |
| 1554          | 3/28/2010   | Outside Spigot                            | Upland               |                                                      |                 |               |               | < .025           |                | 15             | 196        | < .002          | 48.4       |                 | < .01           |
| 1555          | 4/9/2010    | Basement Pressure Tank                    | Upland               |                                                      |                 |               |               | 0.084            |                | < 1            | 65         | < .002          | 2          |                 | < .01           |
| 1556          | 4/9/2010    | Kitchen Sink                              | Valley               | Yes                                                  |                 |               |               | 0.055            |                | 3              | 55         | < .002          | < 2        |                 | < .01           |
| 1557          | 4/9/2010    | Basement Pressure Tank                    | Valley               |                                                      |                 |               |               | 0.4              |                | 1              | 200        | < .002          | 2          |                 | < .01           |
| 1558          | 5/27/2010   | Garage Sink                               | Valley               |                                                      |                 |               |               | 0.008            |                |                |            | < .002          |            |                 | < .01           |
| 1559          | 5/27/2010   |                                           | Upland               |                                                      |                 |               |               | 0.112            |                |                |            | < .002          |            |                 | < .01           |
| 1560          | 5/27/2010   | Outside Spigot                            | Upland               |                                                      |                 |               |               | 0.124            |                |                |            | < .002          |            |                 | < .01           |
| 1561          | 6/3/2010    | Main House Kitchen Sink                   | Upland               |                                                      |                 |               |               |                  |                |                |            |                 |            |                 |                 |
| 1562          | 6/4/2010    | Outside Hydrant                           | Upland               |                                                      |                 |               |               |                  |                |                |            |                 |            |                 |                 |
| 1563          | 6/4/2010    | Kitchen Sink                              | Upland               | Yes                                                  |                 |               |               |                  |                |                |            |                 |            |                 |                 |



Table S.8. Groundwater Quality Data for 1701 "Pre-Drill" Water Well Samples from Susquehanna County, Pennsylvania

| Water Well ID | Sample Date | Sampling Port    | Topographic Location | Gas Extraction Area (Within 1 km of Active Gas Well) | Selenium (mg/L) | Silver (mg/L) | Sodium (mg/L) | Strontium (mg/L) | Sulfate (mg/L) | Sulfide (mg/L) | TDS (mg/L) | Thallium (mg/L) | TSS (mg/L) | Turbidity (NTU) | Vanadium (mg/L) |
|---------------|-------------|------------------|----------------------|------------------------------------------------------|-----------------|---------------|---------------|------------------|----------------|----------------|------------|-----------------|------------|-----------------|-----------------|
| 1564          | 6/4/2010    | Kitchen Sink     | Upland               |                                                      |                 |               |               |                  |                |                |            |                 |            |                 |                 |
| 1565          | 6/4/2010    | Kitchen Sink     | Valley               |                                                      |                 |               |               |                  |                |                |            |                 |            |                 |                 |
| 1566          | 6/13/2010   | Kitchen Sink     | Valley               |                                                      |                 |               |               |                  |                | < 1            |            |                 |            |                 |                 |
| 1567          | 6/13/2010   | Hydrant On Well  | Valley               |                                                      |                 |               |               |                  |                | < 1            |            |                 |            |                 |                 |
| 1568          | 6/13/2010   | Kitchen Sink     | Valley               |                                                      |                 |               |               |                  |                | < 1            |            |                 |            |                 |                 |
| 1569          | 6/13/2010   | Kitchen Sink     | Upland               |                                                      |                 |               |               |                  |                | < 1            |            |                 |            |                 |                 |
| 1570          | 6/13/2010   |                  | Valley               |                                                      |                 |               |               |                  |                | < 1            |            |                 |            |                 |                 |
| 1571          | 6/13/2010   | Kitchen Sink     | Valley               |                                                      |                 |               |               |                  |                | < 1            |            |                 |            |                 |                 |
| 1572          | 6/12/2010   | Pressure Tank    | Upland               |                                                      |                 |               |               |                  |                | <1             |            |                 |            |                 |                 |
| 1573          | 6/7/2010    | Outside Spigot   | Upland               |                                                      |                 |               |               |                  |                |                |            |                 |            |                 |                 |
| 1574          | 6/7/2010    | Spring Pipe      | Upland               |                                                      |                 |               |               |                  |                | < 1            |            |                 |            |                 |                 |
| 1575          | 6/7/2010    | Kitchen Sink     | Upland               |                                                      |                 |               |               |                  |                | < 1            |            |                 |            |                 |                 |
| 1576          | 6/10/2010   | Pressure Tank    | Upland               |                                                      |                 |               |               | 0.13             |                | < 1            | 110        | < .002          | < 2        |                 | < .01           |
| 1577          | 6/10/2010   | Kitchen Sink     | Upland               |                                                      |                 |               |               |                  |                | < 1            |            |                 |            |                 |                 |
| 1578          | 6/10/2010   | Pressure Tank    | Upland               |                                                      |                 |               |               |                  |                | < 1            |            |                 |            |                 |                 |
| 1579          | 6/10/2010   | Kitchen Sink     | Upland               |                                                      |                 |               |               |                  |                | < 1            |            |                 |            |                 |                 |
| 1580          | 6/10/2010   | Kitchen Sink     | Valley               |                                                      |                 |               |               |                  |                | < 1            |            |                 |            |                 |                 |
| 1581          | 6/10/2010   |                  | Upland               |                                                      |                 |               |               |                  |                | < 1            |            |                 |            |                 |                 |
| 1582          | 6/10/2010   | Kitchen Sink     | Upland               |                                                      |                 |               |               |                  |                | < 1            |            |                 |            |                 |                 |
| 1583          | 3/25/2009   |                  | Valley               | Yes                                                  |                 |               |               | <0.025           |                | <1             | 53         |                 | <2         |                 |                 |
| 1584          | 6/10/2010   | Kitchen Sink     | Upland               |                                                      |                 |               |               |                  |                | < 1            |            |                 |            |                 |                 |
| 1585          | 6/12/2010   | Pressure Tank    | Upland               |                                                      |                 |               |               |                  |                | < 1            |            |                 |            |                 |                 |
| 1586          | 6/12/2010   | Kitchen Faucet   | Upland               |                                                      |                 |               |               |                  |                |                |            |                 |            |                 |                 |
| 1587          | 6/12/2010   | Bathroom Faucet  | Valley               |                                                      |                 |               |               |                  |                |                |            |                 |            |                 |                 |
| 1588          | 6/14/2010   | At Pressure Tank | Valley               |                                                      |                 |               |               |                  |                | < 1            |            |                 |            |                 |                 |
| 1589          | 6/14/2010   | Kitchen Sink     | Upland               |                                                      |                 |               |               |                  |                | < 1            |            |                 |            |                 |                 |
| 1590          | 4/4/2009    |                  | Valley               |                                                      |                 |               |               | 0.036            |                | < 1            | 48         |                 | < 2        |                 |                 |
| 1591          | 6/2/2011    | Dug Well         | Upland               | Yes                                                  | <0.005          | <0.001        | 2.7           | 0.034            | 9.9            | <3             | 59         |                 | <4         | 1.1             |                 |

Table S.8. Groundwater Quality Data for 1701 "Pre-Drill" Water Well Samples from Susquehanna County, Pennsylvania

| Water Well ID | Sample Date | Sampling Port     | Topographic Location | Gas Extraction Area (Within 1 km of Active Gas Well) | Selenium (mg/L) | Silver (mg/L) | Sodium (mg/L) | Strontium (mg/L) | Sulfate (mg/L) | Sulfide (mg/L) | TDS (mg/L) | Thallium (mg/L) | TSS (mg/L) | Turbidity (NTU) | Vanadium (mg/L) |
|---------------|-------------|-------------------|----------------------|------------------------------------------------------|-----------------|---------------|---------------|------------------|----------------|----------------|------------|-----------------|------------|-----------------|-----------------|
| 1592          | 3/4/2009    |                   | Valley               |                                                      |                 |               |               | 0.181            |                | < 1            | 120        |                 | < 2        |                 |                 |
| 1593          | 4/19/2009   |                   | Upland               |                                                      |                 |               |               | 0.295            |                | < 1            | 140        |                 | < 2        |                 |                 |
| 1594          | 9/1/2009    |                   | Upland               | Yes                                                  |                 |               |               | 0.298            |                | < 1            | 128        |                 | < 2        |                 |                 |
| 1595          | 7/19/2011   |                   | Upland               |                                                      |                 |               |               |                  |                |                |            |                 |            |                 |                 |
| 1596          | 2/20/2009   | Barn Sink         | Valley               |                                                      |                 |               |               | 1.22             |                | <1             | 147        |                 | <2.0       |                 |                 |
| 1597          | 2/26/2009   | Barn Sink         | Upland               |                                                      |                 |               |               |                  |                | <1             | 130        |                 | <2         |                 |                 |
| 1598          | 11/9/2009   | Pressure Tank     | Valley               | Yes                                                  |                 |               |               | 0.358            |                | < 1            | 80         |                 | < 2        |                 |                 |
| 1599          | 12/6/2009   | Kitchen Faucet    | Upland               |                                                      |                 |               |               | 0.058            |                | < 1            | 56         |                 | < 2        | < 1             |                 |
| 1600          | 12/6/2009   | Kitchen Faucet    | Valley               | Yes                                                  |                 |               |               | 0.035            |                | < 1            | 60         |                 | < 2        | < 1             |                 |
| 1601          | 12/6/2009   | Pressure Tank     | Valley               | Yes                                                  |                 |               |               | 0.043            |                | < 1            | 92         |                 | < 2        | < 1             |                 |
| 1602          | 12/6/2009   | Kitchen Faucet    | Upland               |                                                      |                 |               |               | 0.178            |                | < 1            | 172        |                 | < 2        | < 1             |                 |
| 1603          | 12/15/2009  | Kitchen Sink      | Upland               |                                                      |                 |               |               | 0.131            |                | <1             | 72         |                 | <2         | <1              |                 |
| 1604          | 12/17/2009  | Pressure Tank     | Upland               |                                                      |                 |               |               | 0.072            |                | < 1            | 12         |                 | < 2        | < 1             |                 |
| 1605          | 1/11/2010   | Pressure Tank     | Upland               |                                                      |                 |               |               | 0.083            |                | < 1            | 84         |                 | < 2        | < 1             |                 |
| 1606          | 1/11/2010   | Kitchen Faucet    | Upland               |                                                      |                 |               |               | 0.072            |                | < 1            | 120        |                 | < 2        | < 1             |                 |
| 1607          | 1/11/2010   | Kitchen Sink      | Upland               |                                                      |                 |               |               | 0.058            |                | <1             | 40         |                 | <2         | 3               |                 |
| 1608          | 1/11/2010   | Pressure Tank     | Upland               |                                                      |                 |               |               | 0.052            |                | < 1            | 20         |                 | < 2        | < 1             |                 |
| 1609          | 1/11/2010   | Pressure Tank     | Upland               |                                                      |                 |               |               | 0.387            |                | < 1            | 164        |                 | < 2        | < 1             |                 |
| 1610          | 1/11/2010   | Pressure Tank     | Upland               |                                                      |                 |               |               | 0.251            |                | < 1            | 116        |                 | < 2        | < 1             |                 |
| 1611          | 1/12/2010   | Spigot Into House | Upland               | Yes                                                  |                 |               |               | 0.252            |                | <1             | 140        |                 | 25.2       | 4               |                 |
| 1612          | 1/16/2010   | Pressure Tank     | Upland               |                                                      |                 |               |               | 1.06             |                | < 1            | 172        |                 | < 2        | < 1             |                 |
| 1613          | 1/21/2010   | Kitchen Sink      | Upland               | Yes                                                  |                 |               |               | 0.478            |                | <1             | 136        |                 | <2         | <1              |                 |
| 1614          | 2/4/2010    | Pressure Tank     | Valley               |                                                      |                 |               |               | 0.169            |                | <1             | 108        |                 | 2.4        | 2               |                 |
| 1615          | 2/4/2010    | Kitchen Sink      | Upland               |                                                      |                 |               |               | 0.116            |                | <1             | 48         |                 | <2         | <1              |                 |
| 1616          | 2/6/2010    | Kitchen Sink      | Valley               |                                                      |                 |               |               | 0.176            |                | <1             | 136        |                 | <2         | <1              |                 |
| 1617          | 2/15/2010   | Kitchen Sink      | Valley               |                                                      |                 |               |               | 0.673            |                | <1             | 180        |                 | <2         | <1              |                 |
| 1618          | 2/15/2010   | Kitchen Sink      | Valley               |                                                      |                 |               |               | 0.656            |                | <1             | 188        |                 | <2         | <1              |                 |
| 1619          | 2/18/2010   | Bathroom Sink     | Valley               | Yes                                                  |                 |               |               | 0.176            |                | <5             | 168        |                 | 68.8       | 15              |                 |

Table S.8. Groundwater Quality Data for 1701 "Pre-Drill" Water Well Samples from Susquehanna County, Pennsylvania

| Water Well ID | Sample Date | Sampling Port      | Topographic Location | Gas Extraction Area (Within 1 km of Active Gas Well) | Selenium (mg/L) | Silver (mg/L) | Sodium (mg/L) | Strontium (mg/L) | Sulfate (mg/L) | Sulfide (mg/L) | TDS (mg/L) | Thallium (mg/L) | TSS (mg/L) | Turbidity (NTU) | Vanadium (mg/L) |
|---------------|-------------|--------------------|----------------------|------------------------------------------------------|-----------------|---------------|---------------|------------------|----------------|----------------|------------|-----------------|------------|-----------------|-----------------|
| 1620          | 2/22/2010   | Kitchen Faucet     | Upland               |                                                      |                 |               |               | 0.864            |                | < 1            | 192        |                 | < 2        | < 1             |                 |
| 1621          | 2/27/2010   | Kitchen Sink       | Valley               |                                                      |                 |               |               | 0.067            |                | <1             | 116        |                 | <2         | <1              |                 |
| 1622          | 3/4/2010    | Bathroom Sink      | Upland               | Yes                                                  |                 |               |               | 0.091            |                | 14             | 225        |                 | 3.6        | 3               |                 |
| 1623          | 3/7/2010    | Pressure Tank      | Upland               |                                                      |                 |               |               | 0.048            |                | < 1            | 56         |                 | 2.8        | < 1             |                 |
| 1624          | 3/28/2010   | Kitchen Faucet     | Upland               |                                                      |                 |               |               | 0.455            |                | < 1            | 180        |                 | < 2        | < 1             |                 |
| 1625          | 4/8/2010    | Outside Faucet     | Upland               |                                                      |                 |               |               | 0.809            |                | < 1            | 132        | < .002          | < 2        |                 | < .01           |
| 1626          | 4/9/2010    | Kitchen Sink       | Valley               |                                                      |                 |               |               | 0.085            |                | 1              | 116        |                 | <2         | <1              |                 |
| 1627          | 4/10/2010   | Kitchen Sink       | Valley               |                                                      |                 |               |               | 0.212            |                | 1              | 110        | <0.002          | <2         |                 | <0.01           |
| 1628          | 4/10/2010   | Pressure Tank      | Valley               |                                                      |                 |               |               | 0.328            |                | 3              | 190        | <0.002          | <2         |                 | <0.010          |
| 1629          | 4/19/2010   | Kitchen Sink       | Valley               |                                                      |                 |               |               | 0.05             |                | <1             | 153        | <0.002          | 2.8        |                 | <0.01           |
| 1630          | 4/22/2010   | Kitchen Sink       | Valley               |                                                      |                 |               |               | 0.255            |                | <1             | 253        | <0.002          | <1         |                 | <0.01           |
| 1631          | 4/22/2010   | Kitchen Sink       | Valley               |                                                      |                 |               |               | 0.244            |                | 1              | 226        | <0.002          | <2         |                 | <0.010          |
| 1632          | 4/22/2010   | Stepmother's House | Valley               |                                                      |                 |               |               | 0.249            |                | <1             | 260        | <0.002          | <2         |                 | <0.01           |
| 1633          | 4/24/2010   | Kitchen Faucet     | Upland               | Yes                                                  |                 |               |               | 0.462            |                | 1              | 213        | < .002          | < 2        |                 | < .01           |
| 1634          | 4/22/2010   | Outside Faucet     | Valley               |                                                      |                 |               |               | 0.222            |                | 2              | 253        | < .002          | < 2        |                 | < .01           |
| 1635          | 5/1/2010    | Kitchen Faucet     | Valley               | Yes                                                  |                 |               |               | 0.123            |                | < 1            | 215        | < .002          | < 2        |                 | < .01           |
| 1636          | 5/1/2010    | Kitchen Sink       | Upland               |                                                      |                 |               |               | 0.278            |                | <1             | 178        | <0.002          | <2         |                 | <0.01           |
| 1637          | 5/21/2010   | Pressure Tank      | Valley               |                                                      |                 |               |               | 0.06             |                | < 1            | 140        | < .002          | 5.6        |                 | < .01           |
| 1638          | 6/3/2010    | Kitchen Faucet     | Upland               |                                                      |                 |               |               | 0.158            |                |                | 115        | < .002          | < 2        |                 | < .01           |
| 1639          | 6/7/2010    | Outside Spigot     | Upland               |                                                      |                 |               |               | 1.97             |                | <1             | 215        | <0.002          | <2         |                 | <0.01           |
| 1640          | 6/12/2010   | Spigot In Garage   | Valley               |                                                      |                 |               |               | 0.056            |                | <1             | 185        | <0.002          | <2         |                 | <0.016          |
| 1641          | 6/13/2010   | Kitchen Sink       | Valley               |                                                      |                 |               |               | 0.668            |                | <1             | <2.0       | <0.002          | <2.0       |                 | <0.01           |
| 1642          | 6/13/2010   | Kitchen Sink       | Valley               |                                                      |                 |               |               |                  |                | <1             | 190        |                 | <2         |                 |                 |
| 1643          | 6/23/2010   | Kitchen Faucet     | Upland               |                                                      |                 |               |               | 0.991            |                |                | 135        | < .002          | < 2        |                 | < .01           |
| 1644          | 7/1/2010    | Kitchen Faucet     | Valley               |                                                      |                 |               |               | 0.211            |                | < 1            | 125        | < .002          | < 2        |                 | 0.01            |

Table S.8. Groundwater Quality Data for 1701 "Pre-Drill" Water Well Samples from Susquehanna County, Pennsylvania

| Water Well ID | Sample Date | Sampling Port              | Topographic Location | Gas Extraction Area (Within 1 km of Active Gas Well) | Selenium (mg/L) | Silver (mg/L) | Sodium (mg/L) | Strontium (mg/L) | Sulfate (mg/L) | Sulfide (mg/L) | TDS (mg/L) | Thallium (mg/L) | TSS (mg/L) | Turbidity (NTU) | Vanadium (mg/L) |
|---------------|-------------|----------------------------|----------------------|------------------------------------------------------|-----------------|---------------|---------------|------------------|----------------|----------------|------------|-----------------|------------|-----------------|-----------------|
| 1645          | 7/2/2010    | Kitchen Sink               | Valley               |                                                      |                 |               |               |                  |                |                |            |                 |            |                 |                 |
| 1646          | 7/6/2010    | Kitchen Faucet             | Valley               |                                                      |                 |               |               | 0.188            |                | < 1            | 110        | < .002          | < 2        |                 | < .01           |
| 1647          | 7/6/2010    | Kitchen Sink               | Upland               |                                                      |                 |               |               | 1.16             |                | <1             | 140        | <0.002          | <2         |                 | <0.010          |
| 1648          | 7/6/2010    | Pressure Tank              | Upland               |                                                      |                 |               |               | 0.193            |                | <1             | 200        | <0.002          | <2         |                 | <0.01           |
| 1649          | 7/7/2010    | Kitchen Sink               | Upland               |                                                      |                 |               |               | 0.392            |                | <1             | 175        | <0.002          | <2         |                 | <0.01           |
| 1650          | 7/7/2010    | Kitchen Faucet             | Valley               |                                                      |                 |               |               | 0.49             |                | < 1            | 195        | < .002          | < .2       |                 | < .01           |
| 1651          | 7/7/2010    | Pressure Tank              | Valley               |                                                      |                 |               |               |                  |                | <1             | 180        |                 | <2         |                 |                 |
| 1652          | 7/8/2010    | Kitchen Sink               | Upland               |                                                      |                 |               |               | 0.315            |                | <1             | 145        | <0.002          | <2         |                 | <0.01           |
| 1653          | 7/9/2010    | Pressure Tank              | Valley               |                                                      |                 |               |               | 0.531            |                | 7              | 115        | < .002          | < 2        |                 | < .01           |
| 1654          | 7/2/2010    | Kitchen Faucet             | Valley               |                                                      |                 |               |               | 0.322            |                | < 1            | 100        | < .002          | < 2        |                 | < .01           |
| 1655          | 7/9/2010    | Outside Spigot             | Valley               |                                                      |                 |               |               | 0.738            |                | <1             | 135        | <0.002          | <2         |                 | <0.010          |
| 1656          | 7/9/2010    | Kitchen Sink               | Valley               |                                                      |                 |               |               | 0.376            |                | <1             | 150        | <0.002          | <2.0       |                 | <0.01           |
| 1657          | 7/7/2010    | Kitchen Faucet             | Upland               | Yes                                                  |                 |               |               | 0.009            |                | < 1            | 100        | < .002          | < 2        |                 | < .01           |
| 1658          | 7/7/2010    | Kitchen Sink               | Upland               |                                                      |                 |               |               | 0.242            |                | <1             | 205        | <0.002          | <2         |                 | <0.010          |
| 1659          | 7/8/2010    | Kitchen Faucet             | Valley               |                                                      |                 |               |               | 0.301            |                | < 1            | 105        | < .002          | < 2        |                 | < .01           |
| 1660          | 7/8/2010    | Kitchen Sink               | Upland               |                                                      |                 |               |               | 0.049            |                | <1             | 115        | <0.002          | <2.0       |                 | <0.010          |
| 1661          | 7/10/2010   | Pressure Tank              | Upland               |                                                      |                 |               |               | 0.144            |                | < 1            | 105        | < .002          | < 2        |                 | < .01           |
| 1662          | 7/10/2010   | Basement Spigot Pre-Filter | Valley               |                                                      |                 |               |               | 0.184            |                | <1             | 140        | <0.002          | 4.4        |                 | <0.01           |
| 1663          | 7/10/2010   | Kitchen Faucet             | Upland               |                                                      |                 |               |               | < .025           |                | < 1            | 65         | < .002          | 4          |                 | < .01           |
| 1664          | 7/10/2010   | Pressure Tank              | Upland               |                                                      |                 |               |               | 0.252            |                | <1             | 110        | <0.002          | <2         |                 | <0.01           |
| 1665          | 7/11/2010   | Kitchen Faucet             | Upland               |                                                      |                 |               |               | 0.706            |                | < 1            | 130        | < .002          | < 2        |                 | < .01           |
| 1666          | 7/12/2010   | Kitchen Faucet             | Valley               |                                                      |                 |               |               | 0.738            |                | 6              | 140        | < .002          | < 2        |                 | < .01           |
| 1667          | 7/13/2010   | Basement (Pre-Filter)      | Valley               | Yes                                                  |                 |               |               | 0.154            |                | < 1            | 110        | < .002          | < 2        |                 | < .01           |
| 1668          | 7/13/2010   | Kitchen Sink               | Valley               |                                                      |                 |               |               | 0.068            |                | <1             | 55         | <0.002          | <2         |                 | <0.01           |
| 1669          | 7/13/2010   | Deep Well                  | Valley               |                                                      |                 |               |               | 0.712            |                | < 5            |            | < .002          |            |                 | < .01           |

Table S.8. Groundwater Quality Data for 1701 "Pre-Drill" Water Well Samples from Susquehanna County, Pennsylvania

| Water Well ID | Sample Date | Sampling Port   | Topographic Location | Gas Extraction Area (Within 1 km of Active Gas Well) | Selenium (mg/L) | Silver (mg/L) | Sodium (mg/L) | Strontium (mg/L) | Sulfate (mg/L) | Sulfide (mg/L) | TDS (mg/L) | Thallium (mg/L) | TSS (mg/L) | Turbidity (NTU) | Vanadium (mg/L) |
|---------------|-------------|-----------------|----------------------|------------------------------------------------------|-----------------|---------------|---------------|------------------|----------------|----------------|------------|-----------------|------------|-----------------|-----------------|
| 1670          | 7/28/2010   | Kitchen Faucet  | Valley               |                                                      |                 |               |               | 0.278            |                | < 1            | 136        | < .002          | < 2        |                 | < .01           |
| 1671          | 7/28/2010   | Milkhouse Sink  | Upland               | Yes                                                  |                 |               |               | 0.119            |                | <1             | 140        | <0.002          | 2          |                 | <0.01           |
| 1672          | 8/7/2010    | Kitchen Sink    | Upland               |                                                      |                 |               |               | 0.091            |                | <1             | 185        | <0.002          | <2         |                 | <0.01           |
| 1673          | 8/8/2010    | Kitchen Sink    | Upland               |                                                      |                 |               |               | 0.043            |                | <1             | 105        | <0.002          | <2         |                 | <0.01           |
| 1674          | 8/13/2010   | Outside Hydrant | Valley               |                                                      |                 |               |               | 0.124            |                | < 1            | 195        | < .002          | 4          |                 | < .01           |
| 1675          | 8/19/2010   | Kitchen Faucet  | Valley               | Yes                                                  |                 |               |               |                  | 17             | < 1            | 135        |                 | < 2        | < 1             |                 |
| 1676          | 9/23/2010   | Outside Spigot  | Upland               |                                                      | <0.005          | <0.005        | 19.8          | 1.95             | <5             | <1             | 152        |                 | <2         | <1              |                 |
| 1677          | 10/10/2010  |                 | Valley               | Yes                                                  | <0.005          | <0.005        | 16.1          | 0.053            | 13             | <1             | 90         |                 | <2         | <1              |                 |
| 1678          | 10/18/2010  | Kitchen Sink    | Valley               | Yes                                                  | <0.005          | <0.005        | 11.8          | 0.219            | 20             | <1             | 180        |                 | <2         | 1               |                 |
| 1679          | 10/18/2010  | Kitchen Faucet  | Upland               | Yes                                                  |                 |               |               |                  | 14             | < 1            | 190        |                 |            | < 1             |                 |
| 1680          | 10/19/2010  | Kitchen Faucet  | Valley               | Yes                                                  |                 |               |               |                  | 13             | < 1            | 150        |                 | < 2        | < 1             |                 |
| 1681          | 10/26/2010  | Spring House    | Valley               | Yes                                                  | <0.005          | <0.005        | 2.75          | 0.04             | 12             | <1             | 60         |                 | <2         | <1              |                 |
| 1682          | 10/29/2010  | Kitchen Faucet  | Upland               |                                                      | <0.005          | <0.005        | 15.1          | 0.138            | 14             | <1             | 180        |                 | <2         | <1              |                 |
| 1683          | 10/29/2010  | Kitchen Faucet  | Upland               |                                                      | <0.005          | <0.005        | 13.6          | 0.168            | 23             | <1             | 280        |                 | <2         | <1              |                 |
| 1684          | 11/11/2010  | Kitchen Faucet  | Valley               | Yes                                                  |                 |               |               |                  | 28             | < 1            | 240        |                 | < 2        | 1               |                 |
| 1685          | 11/11/2010  | Kitchen Faucet  | Upland               |                                                      |                 |               |               |                  | 8              | < 1            | 140        |                 | < 2        | < 1             |                 |
| 1686          | 11/11/2010  | Kitchen Faucet  | Upland               | Yes                                                  | <0.002          | <0.001        | 12.6          | 0.39             | 18             | <1             | 173        |                 | <2         | <1              |                 |
| 1687          | 12/2/2010   | Kitchen Sink    | Valley               |                                                      | <0.005          | <0.005        | 12.3          | 0.172            | 18             | <1             | 140        |                 | <2         | <1              |                 |
| 1688          | 12/4/2010   | Kitchen Sink    | Valley               |                                                      | <0.005          | <0.005        | 1.48          | 0.034            | 8              | <1             | 60         |                 | <2         | 1               |                 |
| 1689          | 12/5/2010   | Kitchen Faucet  | Valley               | Yes                                                  |                 |               |               |                  | 14             | < 5            | 153        |                 | 11         | 30              |                 |
| 1690          | 12/9/2010   | Kitchen Faucet  | Upland               |                                                      |                 |               |               |                  | 9              | < 1            | 87         |                 | < 2        | < 1             |                 |
| 1691          | 12/11/2010  | Kitchen Sink    | Valley               |                                                      |                 |               |               |                  | 7              | <1             | 60         |                 | 3.2        | 1               |                 |
| 1692          | 12/14/2010  | Kitchen Sink    | Upland               | Yes                                                  | <0.002          | <0.001        | 3.8           | 94               | 10             | <1             | 80         |                 | <2         | <1              |                 |
| 1693          | 12/14/2010  | Kitchen Faucet  | Upland               | Yes                                                  | <0.002          | <0.001        | 21            | 0.41             | 17             | <1             | 213        |                 | 2.4        | <1              |                 |
| 1694          | 12/18/2010  | Kitchen Faucet  | Valley               | Yes                                                  |                 |               |               |                  | 26             | < 1            | 213        |                 | < 2        | 1               |                 |

Table S.8. Groundwater Quality Data for 1701 "Pre-Drill" Water Well Samples from Susquehanna County, Pennsylvania

| Water Well ID | Sample Date | Sampling Port            | Topographic Location | Gas Extraction Area (Within 1 km of Active Gas Well) | Selenium (mg/L) | Silver (mg/L) | Sodium (mg/L) | Strontium (mg/L) | Sulfate (mg/L) | Sulfide (mg/L) | TDS (mg/L) | Thallium (mg/L) | TSS (mg/L) | Turbidity (NTU) | Vanadium (mg/L) |
|---------------|-------------|--------------------------|----------------------|------------------------------------------------------|-----------------|---------------|---------------|------------------|----------------|----------------|------------|-----------------|------------|-----------------|-----------------|
| 1695          | 10/29/2009  | Pressure Tank            | Upland               | Yes                                                  |                 |               |               | 0.717            |                | < 1            | 315        |                 | < 2        |                 |                 |
| 1696          | 11/6/2010   | Kitchen Faucet           | Upland               |                                                      | < .002          | < .001        | 59.9          | 0.013            | 12             | < 1            | 124        |                 | < 2        | < 1             |                 |
| 1697          | 3/19/2009   |                          | Upland               | Yes                                                  |                 |               |               | 0.88             |                | < 1            | 140        |                 | < 2        |                 |                 |
| 1698          | 3/25/2009   |                          | Upland               |                                                      |                 |               |               | 0.093            |                | < 1            | 73         |                 | < 2        |                 |                 |
| 1699          | 3/12/2009   |                          | Upland               |                                                      |                 |               |               | 0.181            |                | < 1            | 140        |                 | 3.2        |                 |                 |
| 1700          | 4/5/2010    | Kitchen Sink, Main House | Upland               |                                                      |                 |               |               | 0.261            |                | < 1            | 152        | < 0.002         | 2          |                 | < 0.010         |
| 1701          | 6/2/2011    |                          | Valley               |                                                      | < .005          | < .001        | 25            | 1.3              | 12             | < 3            | 180        |                 | < 4        | < .85           |                 |
